# Supplementary material for: A map of directional genetic interactions in a metazoan cell
Source: eLife journal article supplement (doi:10.7554/elife.05464), 2015-03-06
Supplement: supp [file elife_poa_e05464_Figure_4_figure_supplement_1.pdf › elife_poa_e05464_Figure_4_figure_supplement_1.pdf]

geometric  
interpretation  $\longrightarrow$  directional  
relationships  
between genes

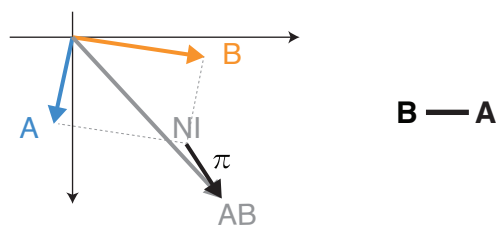

Figure 4 - figure supplement 1
