# Supplementary material for: A map of directional genetic interactions in a metazoan cell
Source: eLife. 2015 Mar 6;4:e05464. doi: 10.7554/eLife.05464 (PMC4384530; doi:10.7554/eLife.05464)
Supplement: Supplementary file 1. — A table of primer and dsRNA sequences for all targeted genes. DOI: http://dx.doi.org/10.7554/eLife.05464.019 [file elife05464s001.xlsx]

## Sheet: Table_S1_targetGenes
Supplemental Table S1. Primer and dsRNA sequences for targeted genes
TargetPlate384	384-well plate identifier [target set]
Well384	384-plate well
ID	dsRNA identifier
Content	Well content ('probe', 'empty' or controls targeting Rh3, Rh6, Pvr, th, or Rho1)
FBgnID	Current FBgn gene identifier
Name	Current gene name
Symbol	Current gene symbol
Length[nt]	dsRNA nucleotide length
SeqFor	Forward primer sequence
SeqRev	Reverse primer sequence
Sequence	dsRNA sequence
TargetPlate384	Well384	ID	Content	FBgnID	Name	Symbol	Length[nt]	SeqFor	SeqRev	Sequence
HD3A1001	A01	HD3100001	empty
HD3A1001	A02	HD3100097	empty
HD3A1001	A03	HD3100002	control_rh3	FBgn0003249	Rhodopsin 3	Rh3	171	GTCTTCTCCGCAGCCAAAT	GGAGCCAATGATTCCAAAGA	GTCTTCTCCGCAGCCAAATCGCTGCGAACTCCCTCCAATATACTGGTCATCAATCTGGCCTTCTGCGACTTCATGATGATGGTCAAGACTCCGATATTCATCTACAATAGCTTCCACCAGGGATATGCGCTGGGTCATCTGGGATGCCAGATCTTTGGAATCATTGGCTCC
HD3A1001	A04	HD3100098	control_th	FBgn0260635	thread	th	173	CGGTGAAGGTCTTTAATCGC	ACAACCAGAACACAAAATGGC	CGGTGAAGGTCTTTAATCGCGTCTCCTCGCGGTTTAAATCGTTCATTCTGGTTTTGTTTATATTATTTTTGAATAGCTGGGTCGCGTTCGTGTTGTTATCCACCTGATCAAAAGCGATAGGTCCATAAGACGGAAGATCAGCTACAACAGATGCCATTTTGTGTTCTGGTTGT
HD3A1001	A05	HD3100003	probe	FBgn0002441	lethal (3) malignant brain tumor	l(3)mbt	212	CAAACCCAAAGTAACCGTAAAT	GCGATTTGTGCTTTATATCCG	CAAACCCAAAGTAACCGTAAATATTTAAAACTAATTCGCAATCTGTGCATTTAAATACCAAATGTTGGTATATTATCAGAACCGAGAAACACGAACAATGAGAGCAAGGAAACGCGCGAAACAATAACTTTAATTCAAAAACTTAACAATTTCTGCGATTTTGATTAAGAGAAAAGTGATTGATGAATATACGGATATAAAGCACAAATCGC
HD3A1001	A06	HD3100099	probe	FBgn0038760	Mediator complex subunit 25	MED25	206	AGTATCCGGGCAAATCATGT	TGCTCTCTCCTTGAGGCTGT	AGTATCCGGGCAAATCATGTGAGCAGCTGGCGGCGCTCTTCAACGAGCGCAAAATCAATCTCTCCATTATTGCGCCACGCAAGATGCCGGTGTTGTTCAAACTTTTCATGAAGGCCGACGGAGATCAGCCCATTACGAGCAAAAACTATGCCAAGAACATAAGACACCTAGTGCTTCTAAAGGGATACAGCCTCAAGGAGAGAGCA
HD3A1001	A07	HD3100004	probe	FBgn0051156		CG31156	203	CAAGACCAAGGAGGCGAAAT	TGACAGAAAGCCATTTGTGC	CAAGACCAAGGAGGCGAAATCGTCTAAATCTAGTTCTTCTAGTAAAGCAAGCTCCAGTAAAGGATCCAACCAAAATGCAGATAAGAAATTGGATAGCTCAAAGTTTGAGAATTATTTCAACTTCCAGGGTGATGTTAAAACTATAAAACCTTATCAAATGTTAGCCATCAATCGTGGGGAGAAGCACAAATGGCTTTCTGTCA
HD3A1001	A08	HD3100100	probe	FBgn0036405		CG6833	202	GGCATCAACAGCAGCACTAT	GGCACATTACGTGCTGAAAA	GGCATCAACAGCAGCACTATTAGCAGCTCACTCGGGGAGCCCCATTGCACTGAGGGGTGTTCCATTACGGTAGTCTTAAATTTTTAAGTATACACACGGGTTTCATTCACGTGAAACTGTTGCTTAAATGTATAAAATGTTACAACCTTAGCCATAGTTCTTTCTTGAAGGCATCGGAGCGGTTTTCAGCACGTAATGTGCC
HD3A1001	A09	HD3100005	probe	FBgn0004635	rhomboid	rho	225	GCGACTCGAAACTGAAATTGA	AAAATGCGTGGGTTTCTTGT	GCGACTCGAAACTGAAATTGAAACTGAAAGAAAGAAATATTCAAATTGTCGTGTGTGTGGGTGCAAGCAGAGAATATATATCTCAAGAATATCTGAATACAAGCTCCTGGATTTACGAGCAGCAAAACTAAGTTACCAATGTGCGAGCCGAAAAAAGCGAGTGAAAAACGTGCGAATATGCCAGCTAACTAAAGACATTTGGATTACAAGAAACCCACGCATTTT
HD3A1001	A10	HD3100101	probe	FBgn0029936		CG4617	202	CTGGATCTTGACCAGGAGATG	CGCGCATGTAAAGACTCTGA	CTGGATCTTGACCAGGAGATGCTCGTGGATGATGGCATTATCTCGGATAGCGAGGAATTCCATCCGGATACAACGGCAACGGTCGTGGCCATTCTGAATTCCGACGATGAACTGGACAATCTGGTGCAGGATATCGTCGATGGTGTCCAGGCGGAGGCCACCAGCCAAGAGTCATCCGTCCGTCAGAGTCTTTACATGCGCG
HD3A1001	A11	HD3100006	probe	FBgn0038108		CG7518	204	GAGCTGCGAAACCAGCACTA	AATAACTTGAGCCAGAAACTGC	GAGCTGCGAAACCAGCACTATGTGTACAAAACATACTGGACCTTCGTGCTCTCCATCTACGCCAACTTCTTTGTAAAATTCAACTCGAGCAGCACGGATTTCGGTCACCTGGAGCTAATCAAGGGCGATCTGCGCCTGCGGCTAAACAGCGTAGTTGGCGACAAGGAGGACAATCGGTTTGAGCAGTTTCTGGCTCAAGTTATT
HD3A1001	A12	HD3100102	probe	FBgn0040080	rapsynoid	raps	223	GGTATTCTCATCGACCCCAA	AGGTGCTCTGAAAACTGGGA	GGTATTCTCATCGACCCCAATCGGTCACACTGGTCGTGAATCAGAAACGCACTAATTAGTCAAAAAAACGGTACAAAAGATCGCTTAATTGCTGAAATTTCACCTGTCGCAGTTAAGTTTACCCACCAGCAGTTCAAAACCAGCCAGAGGCTAGCTAAAAACCCCAAAGATCGACCCCAAAACATCGCCGCAAAGTGGACAACTCCCAGTTTTCAGAGCACCT
HD3A1001	A13	HD3100007	probe	FBgn0039209		CG13624	205	AAACATTTTCTTGAGCTCGCA	GGTCGCGAAAAAGTCAAAAA	AAACATTTTCTTGAGCTCGCAATTAGTCGAGAAAATTCTCTATTGAACCTCCTTCCCTCCTCAAAAACACAACGTTCTGTTAAATTGTTCTACATAAGTGATATAATATTGATAACCAAGATATAACTGTGATTCAAAGAGCCTGGGCTTTATATGTTTTGTATGGCAGAAAATTGAAGAAAATATTTTTGACTTTTTCGCGACC
HD3A1001	A14	HD3100103	probe	FBgn0260012		pds5	205	CCAGCACAGTGTCAAGGTGA	CATTTTGATGGTGGACTCG	CCAGCACAGTGTCAAGGTGACTAACTTTTTTCTAGATGTGCTAAGCCCGTTGATCACAGAAGCCGACAATCTGTCGGTGGAATTGTTGGATCTCATTCTGATTAACATCGTAGAGCCGTACAAATCTAACAACAAGTTTGCCTGCCAATTAACAGAACAACTTCTCACTAAAACGGGCGATGCTCTCGAGTCCACCATCAAAATG
HD3A1001	A15	HD3100008	probe	FBgn0262714	Sin3A-associated protein 130	Sap130	213	GGCAGCATCAGGCTACACTA	TGGTTGTGTTCAGCTTAGCG	GGCAGCATCAGGCTACACTAGTTTACTCCTCCAATGTGTCTGCACCGAATGCAAGTCAGAATCCGGGTCAGCAATTTAATCCACGCTTTGCTGTGGCCACGCCCACAGGCGGAGTAACAACAACGACGCCCGGTGGAACGACAGTAACACCTCGACAGGTGCGACCAATTCCGCTGGGCAAGAGTTTTCCAACCGCTAAGCTGAACACAACCA
HD3A1001	A16	HD3100104	probe	FBgn0003507	serpent	srp	206	AAGATGGAGTAGGCGCGA	TGGACCATTAAAATTCGACG	AAGATGGAGTAGGCGCGACACGCTGTATGTCGCACGACCAAAGATTCTGTTGTTACATTAATCTCATAGCTCCAAAGAATTTATAGCCTGTATACCAAGAGCAGTTCTCAAAGAACACTCATCTATCTAAAATCTATCGAATCATTAGTTGTACATACGGTCTAAATCGATTGATACTTACATTTTCGTCGAATTTTAATGGTCCA
HD3A1001	A17	HD3100009	probe	FBgn0038577		CG12321	201	TCTTCAACTCATTCCGGACAC	ATCAGGGCTGGATGTGTGAT	TCTTCAACTCATTCCGGACACCAAGAGATTTAACCCAATTATGCTGTTTCTAAAGGACAAGCGTACCACTCTGGACGTAGCAGAGCACACAGTAATCATACCGAGCATTTGCGTGGGAAACGCGGCGCAGCTGGCCTGTGACCTGTTGATTGCGTCCAAGGAACTCCGGCGAATTGGATCCATCACACATCCAGCCCTGAT
HD3A1001	A18	HD3100105	probe	FBgn0034537	DMAP1	DMAP1	209	CTGAACATACCGCCCTCG	TTGTTTATCCATTTATTTCCCCA	CTGAACATACCGCCCTCGCTGGTGCCCATCAAGACCGAAGCCCTGGACAATAGCACAAATTAATTAAGTTAACGCGGCCCGTTTCCACTCAGATTCCCCAGACGCCGAAGTGTGTGCGGCGTGCTAATCATTGTAACCCGTTTTCCACTGTCCATATTTGTGCATTTGCGCTACTCCCAGTCCGCATGGGGAAATAAATGGATAAACAA
HD3A1001	A19	HD3100010	probe	FBgn0038704		CG5316	202	AAAGTCTCGCCGTTGCTG	GAAAGATGCTGGGAATGTCG	AAAGTCTCGCCGTTGCTGCAATTCCAAGCAAATCAGGCAGTAGCATTTGTGATGTCCTGGTCAAGTGCACTAATCAAAGATATCTCGAAACCAGAAAATTTGATCATTTCGTCAGAAATCGCAGTGGTCATAGCAGACAAGTTTCCCAAGGCGCAGCATCACTACTTGGTGCTACCATTGGCCGACATTCCCAGCATCTTTC
HD3A1001	A20	HD3100106	probe	FBgn0020909	Rtc1	Rtc1	212	CGGTGAAGATCAGCCAAATC	ATAGTAGCCAATGCCACGCT	CGGTGAAGATCAGCCAAATCCGTTCGGAGGACGAAACGGCACCCGGTCTGCGGGAGTACGAGATAAGTTTAATTCGCCTGCTTGATAAAATCACCAATGGAACCAAGATCGAATTGAATCCCGCCGGCACGAGTGTCATGTTCTCACCAGGATTACTGCATGGCGGTCAGCTAAATCATGATTGCTGTGTCCAGCGTGGCATTGGCTACTAT
HD3A1001	A21	HD3100011	probe	FBgn0032906	Replication protein A2	RPA2	209	ATAGTGCGGAACGTGGAGAC	AAAACGGGCAGTAGCTTGAA	ATAGTGCGGAACGTGGAGACTTCCTCGACGAAGATCACCTACACCCTGGAGGATCATAGCGGCAGGATCGATGCGCACTACTGGCTTGAGGAGGGCGACGCTCTCAAGGCACCCGAAGTAATGGTCAACAACTACGTGAAGGTCTACGGCACCACCCGGTCGCAAGGCGGTTCCAAAACCCTAATGATCTTCAAGCTACTGCCCGTTTT
HD3A1001	A22	HD3100107	probe	FBgn0010417	TBP-associated factor 6	Taf6	216	TCACCGAGGACAAGGAAATC	CTGCCGCATCTTTGTTTAGG	TCACCGAGGACAAGGAAATCGACCTAGGAGAAATCACATCCACCAACTCTGTAAAAATTCCCCTGGATCTCACCCTGCGCTCCCATTGGTTTGTTGTGGAGGGAGTGCAACCCACTGTGCCCGAAAACCCCCCTCCGCTCTCGAAGGATTCCCAGTTACTGGACTCGGTCAATCCAGTTATTAAGATGGATCAAGGCCTAAACAAAGATGCGGCAG
HD3A1001	A23	HD3100012	probe	FBgn0031631		CG3225	225	ACAGGTGGCCTATCTGCATC	CGCACTGTGGTCTGTTGGTA	ACAGGTGGCCTATCTGCATCACTCTGGAGTTTATAGACAAATCAGCAGCGGCACTGAACTGGCCATTCATCCGAACTCCACTCTCTACACACTTCCTCAAGCTCAGTACGTGGTCTATGGGGAACTGCTCCAAACGACGAAATTGTTCATGAACTACGTGACCGTAATCAAGAGAGAGTGGCTGACGGAGCTGGCGCCGCATTATTACCAACAGACCACAGTGCG
HD3A1001	A24	HD3100108	probe	FBgn0035026		Fcp1	223	TCCTTGAGTAGAGCGTCCAA	TCCGCTGAAACGGAATTTAT	TCCTTGAGTAGAGCGTCCAACTACACTTATGCTTAGGGTTCGTACTGTATGTATTAGCTGTTAATATGTACTTTAGAATAGCCTGTAAGATAGCGCACACGTGCGGGCGGCCAGGTCCTTCAATCGCGTACATTCTTGAATCAAAAACTCTCATTCTGATCTAATGTAAATTGAAGCCTACTGTAAATGTAAATGTTTTAAAAATAAATTCCGTTTCAGCGGA
HD3A1001	B01	HD3100193	empty
HD3A1001	B02	HD3100289	empty
HD3A1001	B03	HD3100194	control_th	FBgn0260635	thread	th	173	CGGTGAAGGTCTTTAATCGC	ACAACCAGAACACAAAATGGC	CGGTGAAGGTCTTTAATCGCGTCTCCTCGCGGTTTAAATCGTTCATTCTGGTTTTGTTTATATTATTTTTGAATAGCTGGGTCGCGTTCGTGTTGTTATCCACCTGATCAAAAGCGATAGGTCCATAAGACGGAAGATCAGCTACAACAGATGCCATTTTGTGTTCTGGTTGT
HD3A1001	B04	HD3100290	control_rh3	FBgn0003249	Rhodopsin 3	Rh3	171	GTCTTCTCCGCAGCCAAAT	GGAGCCAATGATTCCAAAGA	GTCTTCTCCGCAGCCAAATCGCTGCGAACTCCCTCCAATATACTGGTCATCAATCTGGCCTTCTGCGACTTCATGATGATGGTCAAGACTCCGATATTCATCTACAATAGCTTCCACCAGGGATATGCGCTGGGTCATCTGGGATGCCAGATCTTTGGAATCATTGGCTCC
HD3A1001	B05	HD3100195	probe	FBgn0003415	skuld	skd	223	TCTGCCGACGATATTCTCAA	CTTAGGCTATTGCAGCCGTC	TCTGCCGACGATATTCTCAACTCGACCAATGCCCATCAGTCAGGCAACGATCATCCGCTTGACTCCAATCTCACAGCGGATGTGCTGCGCTTCGTCCTCGAGGGATACAATGCCCTTTCCTGGCTGGCGCTCGACTCCAACACACACGATCGTCTCTCCTGTCTGCCCATCAATGTCCAGACGCTAATGGATCTGTACTATCTGACGGCTGCAATAGCCTAAG
HD3A1001	B06	HD3100291	probe	FBgn0037613	Cyclin-dependent kinase subunit 85A	Cks85A	221	TGTTATCTTGCCACCGGATT	AGAGATTCGCGATGGCCT	TGTTATCTTGCCACCGGATTTGGCCAAACATGTGCCGAAGGCTCATCTGATGACCGAGACGGAGTGGCGCAACCTGGGCGTGCAGCAGAGCCCCGGCTGGGTGCACTACATGGTCCACGCGCCGGAGCCGCATGTGATTCTATTCCGACGCAAACGCATTCCGGCAGAGGACGCTCCACAGGTGGCAGCCGCTAATGCGGCTCAGGCCATCGCGAATCTCT
HD3A1001	B07	HD3100196	probe	FBgn0011692	pavarotti	pav	205	CAAGCTGGCCGTTGAGTC	ATATGCACCGCGATCTTTCT	CAAGCTGGCCGTTGAGTCGGACAAAAATAAGCGAGAGTTTGAACTAAAGCTGCGTGAACAGCGAGTGAAATTGCAGGAACGCATGCGCATCAAGGACGAGAAGTTGCGATTGGTCTCCAACATTCTGCAGTCCGAAGATCTGCCCAGTTTGCCGCGGTCACAGAGCTCGGAAAACATACTTAATGAGAAAGATCGCGGTGCATAT
HD3A1001	B08	HD3100292	probe	FBgn0004698	mutagen-sensitive 210	mus210	209	GTTTTCTACCAAGCGCGAAA	TACATTTATGTATCGATGCGTGC	GTTTTCTACCAAGCGCGAAAATGTGAATTTCGCAATTCATTTAAACTGTCCAAAACCGAGATCAGGCAGGATTAAACTTGCCCCCCAACATCCATAATCAAATATCAAATCAGGAGAACGAACTTAGGATATTCTTGTGTAACGCGTGCCCTGAATAACTGCGCAGTAAAAATCAATAACTAAGTAGCACGCATCGATACATAAATGTA
HD3A1001	B09	HD3100197	probe	FBgn0000542	echinus	ec	221	GGACACCACCCAACGACTAT	GCCTCCATCCTTATCCACAC	GGACACCACCCAACGACTATCAGAACCTGAGTGTGATTCAAAAGAATATCTTTCCGAGCAATCTGGCAATGGGTACGGATGAAACGGATGCCTACATTAGCCGCAAGACGGTTGAACATGTGCTGAGTGCCCAGTACCAGAATTTGAGCGTAATCCAGGACAAGATTGGAGGCGGCAATGGAGTCGGTGTCGGCCAACAGAGTGTGGATAAGGATGGAGGC
HD3A1001	B10	HD3100293	probe	FBgn0038772		CG4973	201	GCCTTGGCCCAGTACAAAA	ATCCGAAGAAATCTCCTGAGC	GCCTTGGCCCAGTACAAAAAGTCACAGCGCTGCATCATCTGTTCCCAGCAAACAAATGGTATTTTCAATCCCGCCAAAGAGCTGATAGCTCGCCTCAAGACAAACCCAATGGAAAACTCAGATAGTGATGAGGAGGAGGAATTTGGGAAAAAGGAGGATAAAGCGGAAGCAGGGGAGGAAGCTCAGGAGATTTCTTCGGAT
HD3A1001	B11	HD3100198	probe	FBgn0030268	Kinesin-like protein at 10A	Klp10A	220	CGATGAACCTCTCGCGTAAT	GGACGCTGTAATCCAGTGGT	CGATGAACCTCTCGCGTAATCCCACACAATCGGCTATCGGTGGCAATCTCACCAGCCGTATGACCATGGCCGGAAACATGCTGAACAAGATCCAGGAAAGCCAGTCGATTCCCAATCCGATTGTCAGCAGCAATAGCGTGAATACAAACAGCAACTCCAACACTACGGCCGGCGGAGGTGGTGGCACCACAACGTCGACGACCACTGGATTACAGCGTCC
HD3A1001	B12	HD3100294	probe	FBgn0013746	alien	alien	206	GCTGATGAAATCGGGCATAA	TGTTACGCAGCAAATCTTCG	GCTGATGAAATCGGGCATAAATCCCTTTGACTCACAGGAAGCCAAACCGTATAAAAATGATCCGGAAATCCTTGCTATGACAAACCTGGTCAATTCCTATCAAAACAACGATATCAATGAGTTTGAAACCATCTTAAGGCAACATCGCAGCAATATCATGGCCGATCAGTTTATACGTGAACACATCGAAGATTTGCTGCGTAACA
HD3A1001	B13	HD3100199	probe	FBgn0028992	sds22	sds22	216	ACCTGGACATGCTCACCAAT	TGGCAAGCTTTTCAAGGTTC	ACCTGGACATGCTCACCAATCTGACCATGCTAGAGCTGGGGGATAACAAACTGAAGAAGATCGAAAACATCGAAATGCTCGTGAATCTACGACAGCTCTTCCTGGGCAAAAATAAGATAGCAAAGATCGAGAACTTGGACACATTGGTCAATTTGGAGATACTCAGTCTACAGGCCAATCGCATTGTAAAAATCGAGAACCTTGAAAAGCTTGCCA
HD3A1001	B14	HD3100295	probe	FBgn0028662	Vacuolar H[+] ATPase PPA1 subunit 1	VhaPPA1-1	203	GGTGTGAAAACGACCGTGAT	CAACTGCTGCCTCAAACAGT	GGTGTGAAAACGACCGTGATTTGTTTATTTCATTTCTTTGCCAAACGAAAGACATCGTGTGTGTGTGTCTGTGTTTGATTTTAAGCAGTTTGTTATGTTTGTTTCTACGCTGGCTCTTCAAAGGCTAATTTAAAATGTATTATATTTACTACCGCAAAACGATAAACTTGTATATTTCAAGCTACTGTTTGAGGCAGCAGTTG
HD3A1001	B15	HD3100200	probe	FBgn0028694	Regulatory particle non-ATPase 11	Rpn11	202	CAACCTCCAATTTGGGTCAT	GTGTCCTCGTTGATGGAACA	CAACCTCCAATTTGGGTCATCTGCAAAAGCCCTCCGTACAGGCCCTGATCCACGGGCTCAATCGCCACTACTACTCGATTAGCATAAACTACCGCAAGAACGAACTGGAGCAGAAGATGCTTCTCAATCTGCACAAAAAGTCGTGGAAGGACGGCCTCACGTTGTCCGACTACAATGAGCACTGTTCCATCAACGAGGACAC
HD3A1001	B16	HD3100296	probe	FBgn0045035	telomere fusion	tefu	203	CCGTGTGCTGGTCGATATTT	GGATTAGAAGTCGCACCACAA	CCGTGTGCTGGTCGATATTTTTGGACGCTTAAAGACCAACTGTTATTCGGCCTCTTTTTCTAGTCAGGCCTTGCATGACTTTTTCCTCTACTGTGAAGTTGCAGATGCTGTCTATGATGCAGCCAGAAAAAATGAAACCATAGTTACCCAGTGCTCCTTCTTTGTTCGTGATATTTGGTTTTTTGTGGTGCGACTTCTAATCC
HD3A1001	B17	HD3100201	probe	FBgn0003514	spaghetti squash	sqh	201	ACTCCAGCGCGAAGCACTA	TGAACTCGGCAATCTGCG	ACTCCAGCGCGAAGCACTAGTGCCACCAGCTCCATAGGCCGGCTCCATTTAGCTCCATTAACCGCATCAGAACCACCAATCCAACAGCAACCATGTCATCCCGTAAGACCGCCGGACGTCGCGCCACCACCAAGAAGCGCGCCCAACGCGCCACCTCCAATGTGTTCGCCATGTTCGATCAGGCGCAGATTGCCGAGTTCA
HD3A1001	B18	HD3100297	probe	FBgn0015075	Dead-box-1	Ddx1	225	TCAAGGGCGAATACTGTGTG	CCGTGCAAATCAGAAACTTG	TCAAGGGCGAATACTGTGTGCACGCTATAGATAAACACAATATGGACCGAGCCATTATCTTCTGCCGCACCAAGCAAGACTGTGATAACTTAGAAAGATTTCTCCGCCAGCGAGGCGGAAAACATTACTCGTGCGTCTGCCTTCATGGTGACCGAAAGCCGCAGGAGCGTAAAGAAAACCTGGAAATGTTTAAGCGGCAACAAGTCAAGTTTCTGATTTGCACGG
HD3A1001	B19	HD3100202	probe	FBgn0028982	Spt6	Spt6	209	CGGTGGGGGAGTAGGAGTAG	TTAAATTACACAACTCGGGCG	CGGTGGGGGAGTAGGAGTAGAACGGCTGGGCAGGAGCTGAGACGCCGGTGGGCCGGGGAGCAATCAGGTTTGTGACGACGGAAGAATGAAAAATAAATTTCAATTTTTTCTGACCAGAAATATACCGCCAGCTCTTCTTACTAATGGGAATTCAAGATTGGTTTTATCCGCAGCTTTTATGAATAAAACGCCCGAGTTGTGTAATTTAA
HD3A1001	B20	HD3100298	probe	FBgn0010520	Bekka	Bka	203	CTCCGCTCTGTTCTTCCAGT	CCAGCTTGTACTTGTTGCCC	CTCCGCTCTGTTCTTCCAGTACAACACCCAGCTGGGACCGCCGTACCACATCGTTCTGGACACGAACTTCATTAACTTTAGCATTAAGAACAAACTGGATATTGTGCAAGGTATGATGGACTGTCTGTATGCCAAGTGCATACCCTATATCTCCGACTGCGTGCGTGCCGAGCTGGAGAAGCTGGGCAACAAGTACAAGCTGG
HD3A1001	B21	HD3100203	probe	FBgn0011604	Imitation SWI	Iswi	206	GAAGACTCGGCCACCAAG	TTGAAATGCTTGAGGTAACCC	GAAGACTCGGCCACCAAGGAGATCTTTCGCTTCGATGCCTCACCCGCCTACATCAAAAGTGGAGAGATGCGTGACTACCAGATTCGCGGTCTTAACTGGATGATTTCGCTTTACGAAAATGGTATCAATGGAATTCTGGCCGATGAAATGGGTCTAGGAAAGACCCTGCAGACCATATCTCTGCTGGGTTACCTCAAGCATTTCAA
HD3A1001	B22	HD3100299	probe	FBgn0034186		CG8950	207	AGATCTGCTTTGCCATGGTT	AATAACGCACTTCGTCACCC	AGATCTGCTTTGCCATGGTTACAACAAAAAGATTCACCTACTACCATCACGAGATCGAGAGAATTATGGTACTAACCTGCTACTACAACGACGACTGTGCCATAGCCTTCTCGTATCTGCGTGAGCTGATCGCCAAACAGCCCAGCCAGACAACGCTGTGGAACATGCTATCTCTGATGATTCAAAAGGGTGACGAAGTGCGTTATT
HD3A1001	B23	HD3100204	probe	FBgn0031189		CG14618	212	GTTTGAGCTGCTGACCAAAGT	AAGAATGGGATTCGATTTCAGA	GTTTGAGCTGCTGACCAAAGTTGCTGCCGGTCAGGACTGGACTACGGCCATTCTGGAAACTATTCCCATGCGCAAGGGAGCCAAGGCGAAAATCACAGACAAAAAGGAGCCGAATCATTGCTTGGAGCAGCAGGATGAAAAACAGAAACAGGAAGCTGAGTCAGATAAGCCCACCTTAACCGCCGTCGAGTCTGAAATCGAATCCCATTCTT
HD3A1001	B24	HD3100300	probe	FBgn0034231	Anaphase Promoting Complex subunit 10	APC10	203	GATTTGGTGTAGAGCGTTTGC	CTGCAAGTCGTTGAAGTTCG	GATTTGGTGTAGAGCGTTTGCGAGACAACATCATGGATACTTATTGGCAGTCGGACGGTCAGCTTCCCCACCTGGTCAACATTCAATTCCACAAGCGTACGAACATCAGTCAGATTTACATATACACGGATTACAAGCTGGACGAGAGTTACACGCCATCAAGGATCTCCATACGATCTGGAACGAACTTCAACGACTTGCAG
HD3A1001	C01	HD3100013	probe	FBgn0041111	lilliputian	lilli	220	GAGGCAGCTCATCGAACAA	GCCATGTCGTTTTTCTCGTT	GAGGCAGCTCATCGAACAAGACCCCCTCGCCAACGGAAAGCAACAAGTGGAATCTGAGTCGCTTTTTCCACAAGCCCGCAAATCAGACAAATTCCGAAAGCGTCTCGCCGGGCAATGTAAGCATGAAGGTGCCAGGGATACTGCCAGGTGGAGCCCAAATCATACCCGAGTCCATTGATGTGACAACGGCCATTGTTAAGAACGAGAAAAACGACATGGC
HD3A1001	C02	HD3100109	empty
HD3A1001	C03	HD3100014	probe	FBgn0015376	cutlet	cutlet	204	AACGGATGCAATTGTGAAGA	CATTTTGCCACACAACTTCC	AACGGATGCAATTGTGAAGAGTCCTATTTGGTATCGCTATAAGGAGGGTTTCAACAATGCCGTTCGCAAAGATGTTCACATTCACGAGCTGCTTTAACCCACATCTATTGATTTCCCACTCAAGACTTTTACCCTATTTATTAACTGAAATAATACACAAAAAACCATATATTTCTTACAAGCCGGAAGTTGTGTGGCAAAATG
HD3A1001	C04	HD3100110	probe	FBgn0013765	centrosomin	cnn	203	GGCAGACAGCTCCACAGAAT	AGGCGTGTATTTGCTCTTGC	GGCAGACAGCTCCACAGAATCCTTAAGCAAACAGCTCATCGATGCCAAGATCGAAATCGCGACATTGAGAAAAACTGTCGATGTAAAGATGGAGCTGCTCAAGGATGCCGCTCGAGCCATTTCTCATCACGAGGAATTGCAGCGCAAAGCAGACATTGACAGCCAGGCAATAATCGACGAGTTGCAAGAGCAAATACACGCCT
HD3A1001	C05	HD3100015	control_rh3	FBgn0003249	Rhodopsin 3	Rh3	171	GTCTTCTCCGCAGCCAAAT	GGAGCCAATGATTCCAAAGA	GTCTTCTCCGCAGCCAAATCGCTGCGAACTCCCTCCAATATACTGGTCATCAATCTGGCCTTCTGCGACTTCATGATGATGGTCAAGACTCCGATATTCATCTACAATAGCTTCCACCAGGGATATGCGCTGGGTCATCTGGGATGCCAGATCTTTGGAATCATTGGCTCC
HD3A1001	C06	HD3100111	control_rh3	FBgn0003249	Rhodopsin 3	Rh3	171	GTCTTCTCCGCAGCCAAAT	GGAGCCAATGATTCCAAAGA	GTCTTCTCCGCAGCCAAATCGCTGCGAACTCCCTCCAATATACTGGTCATCAATCTGGCCTTCTGCGACTTCATGATGATGGTCAAGACTCCGATATTCATCTACAATAGCTTCCACCAGGGATATGCGCTGGGTCATCTGGGATGCCAGATCTTTGGAATCATTGGCTCC
HD3A1001	C07	HD3100016	probe	FBgn0030674		CG8184	211	CCTAAGGTGCGACAACTGTG	GTATGCAGTTTCTGTTGCCG	CCTAAGGTGCGACAACTGTGACGGCAGCTTCAAGCACCAGCCGGCAGAGCCACCAGTAACCAACAAACCATGGACGCAACACTATTCCTACAACGCCCTCAAATACACGGGTGCAACGATGAGAAATGCATAATTGATTTGAATTGAACAGAACAGAAGAGAACAGAACAGCCACTGCAAATTTGCGATAGCGGCAACAGAAACTGCATAC
HD3A1001	C08	HD3100112	probe	FBgn0037569	tex	tex	210	GCGTATCGGTGACGAACAC	CGAGTCCGTTGGTTAGGAAG	GCGTATCGGTGACGAACACCAAGGGGGAGAATATCAACATTGCCTGGTCGCCCGATGGCAAAACGATCGCCGTGGGCAACAAGGAGGATCTGATCACCTTTATAGACACACGCACGAACAAGATTCGCGTGGAGGAGCCGTTCAGCTTCGAGGTCAACGAGATATCGTGGAACAACACCAACGACCTGTTCTTCCTAACCAACGGACTCG
HD3A1001	C09	HD3100017	probe	FBgn0033233	Histone demethylase 4A	Kdm4A	202	CGACTACGACGATCTGGAGC	GCCAAAGTAGAGGTAAGCCG	CGACTACGACGATCTGGAGCGCAAGTACTGGAAGAACATCACCTACATATCGCCACTGTATGCAGCCGATGTCAAGGGATCGCTGAGTGATGAAGACCTTGACGTTTGGAACATTGGACGCTTGGACACCATATTAAACTTGGTCAACACTGACTACAACATAATCATCGATGGGGTAAACACGGCTTACCTCTACTTTGGC
HD3A1001	C10	HD3100113	probe	FBgn0029133	REG	REG	204	CGCGTTGCTGATTGTTATTG	GGAACCCCTTGGTGATTAGC	CGCGTTGCTGATTGTTATTGAGAAGATAAGGAACGAGAAGAACCGGTACTACGCCAGGAGACAGGACTCAGGATCAAAGGCTTCCACGGACACGAAAAGGAATCCACATAGCTAACGAAATGCCTAACGACACTGTGGTAAAGGTGCAGGAGTACAAGGACTCGTTGATCCTCAAGGCAGAGCTGCTAATCACCAAGGGGTTCC
HD3A1001	C11	HD3100018	probe	FBgn0023180	Origin recognition complex subunit 6	Orc6	205	TAAGCACCACAAGGAGAGCA	ATCCATATGCGATTGGGATG	TAAGCACCACAAGGAGAGCAAAGTACCATCTAGCACCGATATGGAGGGTAAACTTAAGGAGAACCAGAATGAGAATATCAAGGGTCATGAGGCAAAAAAGGCACATAAGCCCCCACCGGAGGACTACGAAATATGGAAGGCGCGAATGTTGGCCAAGGCGCAGGCCAAATTGAAGGAATTAGAAGCATCCCAATCGCATATGGAT
HD3A1001	C12	HD3100114	probe	FBgn0002283	lethal (3) 73Ah	l(3)73Ah	205	TCACACGCTGAAGTTCGTCT	ATACACTCATGGTTTCGAGGG	TCACACGCTGAAGTTCGTCTACGTGACGCGCTGGCGCTTCCGGGATCCGCCGCTTCGGCTGCAGTTTCGTCCGCGGGTCGAGCTCTAACCACTGTTTTAGTATAATGCCACAACAAATGATCTATTTTTATAATTTATTGACAATGCGTAAATATCGTAATTAGGAGAGTCGCTAGTGTTAGTCCCCTCGAAACCATGAGTGTAT
HD3A1001	C13	HD3100019	probe	FBgn0036621	roquin	roq	225	TGTCAGTCAGGGCTTTGAGA	GGTTCCTGATTTCATCGCTT	TGTCAGTCAGGGCTTTGAGAACATTTACACATACCTACTCTACGCAAATATAAATTTGTATTTATATCTAGAAACTAATCAATTGTGCGCTCTATTATTAATATTATATATTAATGTCAGTTGAGCCTGCGTTTTGCTTTCAAGACTTTGTACATCAGTTTGATTCGAAGCAAAAGTGAGAAAGATTTTGTAACTTGTATTTGTTAAGCGATGAAATCAGGAACC
HD3A1001	C14	HD3100115	probe	FBgn0020270	meiotic recombination 11	mre11	204	CTGGCAAGGCTTATCAAGGA	GTGACCCCAAATCACCAGAT	CTGGCAAGGCTTATCAAGGATTTTAAGGTGAAGTTTAACTGTCCCGAGAACGTTGCTAATGGCGAAGACGGTAATGAGTCCAAAGAGGAGGAGGATTGGTTCCATCTGTTAGTGGTACATCAGAACCGCGCCGATCGGGGACCAAAGAACTATCTACCTGAGGACCTGTTGCCATCGTTTTTGCATCTGGTGATTTGGGGTCAC
HD3A1001	C15	HD3100020	probe	FBgn0000099	apterous	ap	225	GGACCCGGTTTGACTACTGA	GTAGTGCTGGAAACGGTCAA	GGACCCGGTTTGACTACTGAATCCGGATACTTGTCTAGATCAAGCACGGCTAGCTCTTGAATGCTATGGGCTGCCTTGTCGGATGGGAATCAATTTGGAAAGCTTGTCTTGTGTTCAAAATCGAAAAATTGATTCATCCACACGTTAAACGCCCGGGAAACGCCTCGGAAAATGCTAAGAAAATATGTATTTTTGTATTTGCCTATTGACCGTTTCCAGCACTAC
HD3A1001	C16	HD3100116	probe	FBgn0037551	GTPase indispensable for equal segregation of chromosomes	Gie	209	CCTGCAAGGAGAAGGACAAC	GCATCGAAGCATATAAGCGA	CCTGCAAGGAGAAGGACAACATTGACATCACGCTGCAGTGGTTAATTCAACATTCGAAAAGCCAAAGTCGTTAGATAACGAACACCGACATACACACAACTCCGTACCCTCTACACTCACACACTTAGGCACTATATCTCACACATATTTTAATTTTATTGTTTTTGTATTCATTATATATTTTACATTTCGCTTATATGCTTCGATGC
HD3A1001	C17	HD3100021	probe	FBgn0031885	Menin 1	Mnn1	218	ATTGCCAACGAGCTCATACC	TGGGACCTAATGTCGTAATCG	ATTGCCAACGAGCTCATACCGTACGTGATGAAAACAGAAAGTTCTGGTCATTCGGCGAGAAGTATTCTACGAGATTCTGAGGTTTTCGCCAATTTGCTGCGATTCTACGACGGCATCTGCCAATGGGAGGAGGATAGCTTGACTCCCATTCTACACATTGGTTGGGCCAAACCACTGGTGAATAATATCACCAAGTTCGATTACGACATTAGGTCCCA
HD3A1001	C18	HD3100117	probe	FBgn0041210	HDAC4	HDAC4	224	GGCTCCAACTGGATGAAACA	GCAATTACGTGGCTTGCATA	GGCTCCAACTGGATGAAACAATTGTTAACAAAACGAAACAGAAACTAAAAACTATCCTTAAAAAAAAATGAAATCACAAATGTAACTATTAATCTAAGCGAAGCATATGCCCTTGCCATTTTTATTTTCTTATTATTCACCTGTTTTCTCTTTTCAATACAGCAGATTTTTTGAAAAACATACTTTTGAACATAAGCTGTTTCGTATGCAAGCCACGTAATTGC
HD3A1001	C19	HD3100022	probe	FBgn0034645		CG10320	215	GAACGAAGTCTGGCGCTATG	TTCAGTATATCTAATGGTGGCCC	GAACGAAGTCTGGCGCTATGAGCCCAAGGCCTTCGGCACCCACAGATCCCGCCTGAACACCTTCCTTTTCCGCGGACTCGGCGTGGGATTCTGCGCTTTCCTGGCCACCGTCGCCGTGGAGTACGCGCTGGGCATTGGCAAGGGTCAGGGCGGCCATGGACATGGCCACGGTCACGAGGAACACGGAGATAAGGGCCACCATTAGATATACTGAA
HD3A1001	C20	HD3100118	probe	FBgn0052280		CG32280	204	CAAGCCTGATTACGAGCACA	ATGCACTTTCGCTGAAGACA	CAAGCCTGATTACGAGCACAAAAGTCGCTTGTGTGTCCATTTTGAAGAACAGGCCCTTTGATATTGCACAAATTGTAAATCTTTTGAAGTCCGTCTTATGTTTTTCGCACATTGTTTAATGAATAAATCGCTTAGAATGTAGTCAAAAGATAAAATACAACATATTTTTGTAACAAAGTGTAAATGTCTTCAGCGAAAGTGCAT
HD3A1001	C21	HD3100023	probe	FBgn0033010	Atf6	Atf6	223	AAATGGATTAGCGGCACTTT	TTTGTTCGCGCATATTTTCA	AAATGGATTAGCGGCACTTTAAACGTGTCTAATTTTTCAAAGGAAAAAGAGGATTCAAATGGTTTTGAATTTTTTAATAATTATTTTGAGGAAAAACGTGACATACACATCAAACACGAAAAGCGAAAAATGTTTATTGATTTAAATGATTACACATCTGTTTTGCCAGAAAAACAGCAAAAACTAAACAATACGAAATCTTTTGAAAATATGCGCGAACAAA
HD3A1001	C22	HD3100119	probe	FBgn0037632	Tcp-1eta	Tcp-1eta	221	CGTCGACATCAACAAGGAAG	ATGATTCTATTTACATGGGCCTG	CGTCGACATCAACAAGGAAGACATTTCGGACAACTATGAGCAGTGCGTCTGGGAGCCGTCCATCATTAAGATCAATGCACTGACGGCGGCCGCCGAGGCAGCCTGCATGATCCTTTCCGTCGATGAGACAATAAAGAGTCCCAAGGCCGGAGAACCCCCGATGGCCGGCGGTGGCATGGGAATGGGCCGCGGAATGGGCAGGCCCATGTAAATAGAATCAT
HD3A1001	C23	HD3100024	probe	FBgn0001330	kurz	kz	201	TGTTATCGCCTGCGCTGTTA	TTCTTCACGGCCGAGTTGT	TGTTATCGCCTGCGCTGTTATCGATAAGCGTACTTCGCACGTGTGATTTAAATCAATGTTTATATTATTGCCCAAAGTTAATTCTGTTACTTTATTTTATTAACTATATTGGTAAAGTAAAGTAATCATGGGCAAGAAGGTGCACAATGCCAAGGCGCGGCAGAATCCACAAACAATTGTGGACAACTCGGCCGTGAAGAA
HD3A1001	C24	HD3100120	probe	FBgn0020238	14-3-3epsilon	14-3-3epsilon	219	TCACACAAACGGATTTTCACA	GTGGTTCGTCGCCTTCTTT	TCACACAAACGGATTTTCACAAGTAATATCCAGATAGAAATACCATTTTAAAAAGAAATTTTTCCGATTTTACCACCATCGCTTGCGCATGCGCACGGAACGCGTGATGCGTTTTTAAGTCCGTCATTAGGCCATCGCCCATCAATTTTAGTGTTTCAACCGCCGCCCGATACGGTCACACCGCTCGAGAAGTAGAGAAAAAAGAAGGCGACGAACCAC
HD3A1001	D01	HD3100205	probe	FBgn0004647	Notch	N	213	TGTCGGCGACTACTGTGAAC	TCCAGTGTCTTTAGCTGACAGG	TGTCGGCGACTACTGTGAACACCGCAATCCGTGCAATTCGATGCGTTGCCAAAATGGTGGCACCTGTCAGGTGACCTTTCGCAACGGCCGTCCGGGCATCTCGTGCAAGTGTCCTTTGGGCTTCGACGAGTCCCTGTGCGAAATTGCGGTACCGAATGCCTGCGATCATGTGACCTGCCTCAATGGAGGCACCTGTCAGCTAAAGACACTGGA
HD3A1001	D02	HD3100301	empty
HD3A1001	D03	HD3100206	probe	FBgn0002736	mago nashi	mago	216	GACGAGCACATCTCGTTCAC	AAATACGATGTGTCCGTCCG	GACGAGCACATCTCGTTCACCACCTCGAAAACGGGATCATTGGTGGACGTGAACCGGTCAAAAGATCCCGAGGGCCTGCGATGCTTTTACTACCTGGTGCAGGATCTCAAGTGCCTGGTCTTCTCACTCATCGGCCTGCATTTCAAGATCAAGCCCATATAAGCCGTAGCCACCACCTCAAGCATAGCCTATTTATCGGACGGACACATCGTATTT
HD3A1001	D04	HD3100302	probe	FBgn0029148	NHP2	NHP2	201	CCGATGAGTCCGTTGTGG	GCAGGCGAGTCTGTACATCCTTA	CCGATGAGTCCGTTGTGGCCAGCGGCGATGTTACCATCAAGGAGGAGGAGTCCTACGACGACAAGCTGATCTTTGTGAACGCCATCGCGAAACCGATGGCAGGTAAAAAACTGGCCAAAAAGTGCTACAAACTGGTGAAGAAGGCCATGAAGCACAAGACTTTCCTGCGAAATGGACTTAAGGATGTACAGACTCGCCTGC
HD3A1001	D05	HD3100207	control_rh3	FBgn0003249	Rhodopsin 3	Rh3	171	GTCTTCTCCGCAGCCAAAT	GGAGCCAATGATTCCAAAGA	GTCTTCTCCGCAGCCAAATCGCTGCGAACTCCCTCCAATATACTGGTCATCAATCTGGCCTTCTGCGACTTCATGATGATGGTCAAGACTCCGATATTCATCTACAATAGCTTCCACCAGGGATATGCGCTGGGTCATCTGGGATGCCAGATCTTTGGAATCATTGGCTCC
HD3A1001	D06	HD3100303	control_rh3	FBgn0003249	Rhodopsin 3	Rh3	171	GTCTTCTCCGCAGCCAAAT	GGAGCCAATGATTCCAAAGA	GTCTTCTCCGCAGCCAAATCGCTGCGAACTCCCTCCAATATACTGGTCATCAATCTGGCCTTCTGCGACTTCATGATGATGGTCAAGACTCCGATATTCATCTACAATAGCTTCCACCAGGGATATGCGCTGGGTCATCTGGGATGCCAGATCTTTGGAATCATTGGCTCC
HD3A1001	D07	HD3100208	probe	FBgn0030711		Rrp47	108	GCTACAGGCAGAACGCACAT	TCACCCTGCAGTTTCAGGTA	GCTACAGGCAGAACGCACATTGAACACAAATGAACAAATAAAATTGGATAGCTACCTTGTGTACTTGAACAGCACACTGTTTTTCATATACCTGAAACTGCAGGGTGA
HD3A1001	D08	HD3100304	probe	FBgn0034976		CG4049	218	CATGTTGAAAACAGCGAGAAA	AAAAGAATTAACAACGCAGGTTC	CATGTTGAAAACAGCGAGAAAATAAATCGAGAATAACATTTTAAATTAATATAATAACAATCGGAAGGACTTGGTCCTCGCAATCACAGTGGCGCACGCGATAAGCCAAGTATCTCAAGAACGTTCACCAATTAAGAGAACCTCCCAATCGTGCACATAGAAAAATATCCATATGTATAAAATAACAATAATTAAGAACCTGCGTTGTTAATTCTTTT
HD3A1001	D09	HD3100209	probe	FBgn0004875	encore	enc	204	CTCAGCAATGAAGCGGAGTT	GGAGTTGAAGATCACACCCG	CTCAGCAATGAAGCGGAGTTCCCAAAGCTATCGCCTCCAAAGAAATCCGGCGGTCAGCACAATCGCACCAACAGCAACGGCAGCGGCATGGAGTTTAATAACAATAATAACAGTAGTAACAAGAAATTCGTCGTTGATATGAAGGCCAATGGTTTGGACAACAAGCCACACAACAACTCGTCTACGGGTGTGATCTTCAACTCC
HD3A1001	D10	HD3100305	probe	FBgn0041781	SCAR	SCAR	201	TACGATGGTCGAAACCAAGC	AGGCTTAAAATGCAAATGCG	TACGATGGTCGAAACCAAGCGTGGTATGAAATTGGATTACACAAAAGCACCAAAGCTTTTCTACCACCCTTTATACAATATACACCTAATCCTAAATAATATGTCTAAAATCAAAAGTTTCATTGAATTGTATATACACCAACGAGTAATTATCGTTAAATTAATCGCTATAGTGAACGAACGCATTTGCATTTTAAGCCT
HD3A1001	D11	HD3100210	probe	FBgn0031851	apoptosis antagonizing transcription factor ortholog	Aatf	202	GAGTAGCGACTGGACGGATG	TTAAAATCGGTTTTCTTTTAATTTG	GAGTAGCGACTGGACGGATGCCTCCAAGTCCGAGTTGTACAAATCATTGTTTGTCTAGACTGTAATAAACTAATATATGAAGTTTTAAATAGGAATAAAATCTATGAAATGTCATAATTGTTAATTGCCATTTAAAAGAATTATAATAGTAGCACTATATACCTAAACAAAAAAAATCAAATTAAAAGAAAACCGATTTTAA
HD3A1001	D12	HD3100306	probe	FBgn0037931		CG18476	211	CGCATTCAAAAGTGGAAAAC	ATCGTTTTGAATTCCGGTGA	CGCATTCAAAAGTGGAAAACAGGAAGAAAGTCTGTATATAAATGTCACGACTGCCCTAGGAGTTTTAAACGATTCGACTTCTTGAAACGCCATGAAATGCGCGTCCATAAGCCAGAAACTCGATTATATGACTGCTCCCTTTGCATTCGCAAGTTCAGCCGCAGCGAAGCCCTCGAAGCACACCTAAAAATTCACCGGAATTCAAAACGAT
HD3A1001	D13	HD3100211	probe	FBgn0026722	drosha	drosha	209	ATCTTCGCTGGGATGAACAG	GCGACAATTAGAGACAGGCA	ATCTTCGCTGGGATGAACAGCTTTGCGTATGCTATAGCTATAGGAGGCCCAAATTGAGTAAGACAATCGTGGGAGCGGTGTAAAAATGTAATGGGTTATCTTAATGAATCGCTCATTTAGTAGATGCAATTCTCCCCTTTGCTATCAGGACATCTTACTTTCTAAGTAAGATGTTAGAGGACAAAAATTTGCCTGTCTCTAATTGTCGC
HD3A1001	D14	HD3100307	probe	FBgn0031868		Rat1	206	CAGCAGGCAACAGAATCAGA	CTTTGATAGAAATGCAATGGG	CAGCAGGCAACAGAATCAGAATTATAGACGGTTTTAGGTGTATCATACAAACAATATAATATGTAGCGCATAACAAAAGTGTAATCCATATTAATTTACATTATTTTTTAATGAAGAAAATATACTGATTAAGGATTTCCAAACAAACTCATGCCAAGTTCTGAGTTTGTTCTTTAAATGAAATACCCATTGCATTTCTATCAAAG
HD3A1001	D15	HD3100212	probe	FBgn0036450		CG13472	203	GAAGCCAGAGAAGGCTCAAA	CCTCCTCCTGTTGTTTTTCG	GAAGCCAGAGAAGGCTCAAACCAACCAAAAGCATCACAATCCCAGGCACAATTCGCAGGCGAACTACAGTCAATTGGCGAATGGCTACACTTACGATCCCAGCAAGATCATGGGTTTCCAGAGCAAGGAGGCCAACGAGTTTGCCATGAACCTTCTAAAGAGCCAGGGTGTTACACTGCCCAACGAAAAACAACAGGAGGAGG
HD3A1001	D16	HD3100308	probe	FBgn0039861	partner of drosha	pasha	202	AAGGAATCCATTACACCGGA	CGCCAGCATTCGCTAGTATT	AAGGAATCCATTACACCGGAGCAACTAAACACCTACTGCCAGAAACTCTTCAAATTCAAGGTGATTCGTGTGCTGCGATTTCGGAGTTGGAATGCTCGCCGCAAGTTCACCAAAAACCGCAAACACATCAAGAATATTCAACGACCCACGCTGCCGGATGGCACTAAGCTTATTAAGTTCCCAATACTAGCGAATGCTGGCG
HD3A1001	D17	HD3100213	probe	FBgn0032723	short spindle 3	ssp3	210	TCAACCTGAAGACCCAGCTT	GAATGTGTGAGAGTGCGTGAG	TCAACCTGAAGACCCAGCTTTCTAAGTGATATTATTTTCGAAGAAAATGAAAAATCTGAAGGACAAAACTACTTGAAACATTCGCAAGGAGATCAACAGCAGGATAACTGAACTTTGAATGCAGAAGCGGCACTCAAAACAAACACTTGTAATATTATCTTAAACTAGTTTACTAAACAATCACTTCATCTCACGCACTCTCACACATTC
HD3A1001	D18	HD3100309	probe	FBgn0052706		CG32706	210	TGTCAACTGTCATACCTGATTGC	TTTGAGGGATTTGCTACCCC	TGTCAACTGTCATACCTGATTGCGTACATTACAAAATATATTCGATCCAGCTAAAACGAAAGCTACAATGAAAAAAATAATTAATACATCAAAGCCAAAGCGCAAGTCCACTTCCATGAAAGTGGAGGAGACTAAGCTAGGCGAAGTGCGCTCGGGTAAGCCGCAGACAAAGGAAGGTGAGTCTGCAAATGGGGTAGCAAATCCCTCAAA
HD3A1001	D19	HD3100214	probe	FBgn0025463	Brahma associated protein 60kD	Bap60	211	AGCCCTGCCAAACGTTGTA	GTTGCGACATCTTTGCTACG	AGCCCTGCCAAACGTTGTAATATCTATCGCCCAGTCGACCACCACCAGTAATAGTGCATCCCTGTTTTGACGCCATTTTACAGGCGAAATTGTGTGTGTGTTTGACGCGTTGTTGTATTGAAACAAAAAGGCAGAAATTTTCCTTCGTCTGCAAAGGGCAATTGTTTACGGCTGGAAAAAAGGGAGGACTTCGTAGCAAAGATGTCGCAAC
HD3A1001	D20	HD3100310	probe	FBgn0013984	Insulin-like receptor	InR	207	CAGACGATACCGATGCATTTT	ATTTTTCGCTGGGGATTTCT	CAGACGATACCGATGCATTTTTCGAAAAGGACGACGAAAATACCTATAAAGACGAAGAAGACTTGTCCTCCAACAAACAATTCTATGAGGTGTTTGCCAAGGAATTGCCACCAAATCAAACACATTTTGTCTTTGAAAAACTGCGCCACTTCACCCGCTACGCTATCTTCGTGGTAGCCTGTAGAGAAGAAATCCCCAGCGAAAAAT
HD3A1001	D21	HD3100215	probe	FBgn0025674	Cyclin K	CycK	214	CCTCCAGGAGCCAGTGGATA	CATTGATAAATACCCCGGGAC	CCTCCAGGAGCCAGTGGATACTACAACGCCGGTGGGCGTCCATCGCAGCAGCGCTACTAGTAGATGCAATGACTAATAAACAAGTAAAAAAAATTTGTATATTAAAACTAGCGAACCGTTCGGAATAGGATTTAGAGCGGGGATCTTCGTACGGTTCGGTTTTCTTTTTTGGTTACACTCTAGGCCCAATATTGTCCCGGGGTATTTATCAATG
HD3A1001	D22	HD3100311	probe	FBgn0033754	Adenylate kinase 6	Ak6	203	GGTTTCAAGCCGTCTTCGT	GCTTATATGGGCATCTGCCTT	GGTTTCAAGCCGTCTTCGTGGTAACCTGTCCCAATACAACACTCTACGATCGTCTGAAGGAGCGCAACTACAACGAAAAGAAACTGGCATCCAATATTCAGTGCGAGATCTTTGGAACCATTTTGGAAGAGGCCCGCGATTCCTACAAATCAGATATAGTATTCGAACTTAAGGGCGAAACAAAGGCAGATGCCCATATAAGC
HD3A1001	D23	HD3100216	probe	FBgn0000307	chiffon	chif	216	GACCGCGAAAACCTGATAAA	CGACAATCGACCAATTTTCAC	GACCGCGAAAACCTGATAAAAGGCATAAAAATAACAAAGGCGTTAGCAAACGAACGACGGGCGAACGAAGGCATATAGACGCTTATACCGATCGTTCCCATACAGTTGTGTATATTTAGTCATTGCAACTGATTAACTTGACGCAAGTAAATGCAAGTATAAACTCAAAAACGGCCAACGCAGAGCAAAAGTACAGTGAAAATTGGTCGATTGTCG
HD3A1001	D24	HD3100312	probe	FBgn0003963	u-shaped	ush	212	GAGCGGTACGCGGTACTAAA	TGGCTCCTTCACTTTGTCACT	GAGCGGTACGCGGTACTAAAAATCGTCAGCGGCCGAGGGATTAAGAGCTACAATACGATACCGCACGTTCGTCATAACGAGAATTTGAATAATTGTATTACAGTGAGTAGTGAGTCAAAGAAAATTCCCACGGGAAGTGACAACATAATTGCCGCTTAAGTACGGCCCAAACCGAAAGATAGAAATGTGCAAGTGACAAAGTGAAGGAGCCA
HD3A1001	E01	HD3100025	probe	FBgn0036522		CG7372	202	GGTGCAACGCAGTCAAATAA	TGCCTGCTTCATCGATTGT	GGTGCAACGCAGTCAAATAATGTCGTAAAAGTTCAACAGAACGCAAAGGGATCAAAAAAAGACGGTACTCAGTCGGCCCAGAAATCTGAGACTAATCCCAAGCACCTAGAGAATGCTGAGACAAATTCAAAGGATAATACAGAATCCGTGGCTCTGAAAGAAACCATCCACGATAAGCAGTTGACAATCGATGAAGCAGGCA
HD3A1001	E02	HD3100121	empty
HD3A1001	E03	HD3100026	probe	FBgn0263968	no-on-and-no-off transient C	nonC	223	GGGACGAGTCTGTGTCATCA	ACTATGTGCCGTAGCAGGGT	GGGACGAGTCTGTGTCATCAAGTGGCTTAAGCGAACGTGCCAGCTTCTCATCCATCCATATGCGTCAACGAACCGAGGATATTGTGCTGCACAAGCTATTAGAAGATCGTTGTGTGCCAGATCAGGCGAAAAACCTACTGGACACCCAATGGCGAGACAGTCTTCTGAATCCCAGCTTTGATCAGAGATCCTGCAAGGAGCTCACCCTGCTACGGCACATAGT
HD3A1001	E04	HD3100122	probe	FBgn0003892	patched	ptc	205	AGCTGGGTGAAGTTCCTGAC	TGGGATATTCAAAGTTGCCC	AGCTGGGTGAAGTTCCTGACCGTTATGGGTTTCCTGGCGGCCCTCATATCCAGCTTGTATGCCTCCACGCGCCTTCAGGATGGCCTGGACATTATTGATCTGGTGCCCAAGGACAGCAACGAGCACAAGTTCCTGGATGCTCAAACTCGGCTCTTTGGCTTCTACAGCATGTATGCGGTTACCCAGGGCAACTTTGAATATCCCA
HD3A1001	E05	HD3100027	probe	FBgn0261985	Ptpmeg	Ptpmeg	208	TGAAGATCTCACGCAGCAGT	ATATACGGGTTTTGTAATTGTAATGAT	TGAAGATCTCACGCAGCAGTGCGGCCATTAACGACGACGAGGATTAGGGGCAGGACCATCTAGCTACGCAATCAACAATCTTCCGCTAACACGCCCCAAGTTTTTCTTATTCTATACGAAGCTTCGTCTAAATCTATTTAATTTTTAGATCCCGTAGACATATGTTTAAAACTGATTGTATATCATTACAATTACAAAACCCGTATAT
HD3A1001	E06	HD3100123	probe	FBgn0030788	SIN3-associated polypeptide 30	Sap30	201	TTTGTAGCCTTGGTCCGTTG	CTGATGTCTAGCCAGAGCCC	TTTGTAGCCTTGGTCCGTTGTTAATAGCTCTTTATACACGCACTACATTAAATAAACTATGTAAATTTACAAGAGAATTAACAGAAAACACAACACACTCAATCAAATAGCAATTCGTATTCTTAGGCTTAAAGACATGTTTATTTGATCGTTTGTATTATACATCATGTTAAGTGAAGTGGGGCTCTGGCTAGACATCAG
HD3A1001	E07	HD3100028	probe	FBgn0026597	Axin	Axn	206	CTGATGCACTCGGCAAGATA	TTTGGGTGGCTGGTGAATAG	CTGATGCACTCGGCAAGATACGAATACGATAACGAACGCACCAAGTGTACGCATCTTAGAGCTAGCAACTGGAGAAGCTATTTCCGACAAATCAAAAGCTATATATGTACGGGCGACCGGCTTTTGTAAGCATCACAAACTACTCTCTGCGGGGGCAATGTATTTTTCTGTACAACAAAAACTGATCTATTCACCAGCCACCCAAA
HD3A1001	E08	HD3100124	probe	FBgn0016694	PAR-domain protein 1	Pdp1	204	CAATTTTGTGACTTGGCCTG	TGTGTTTGTGTGGGTGTGTG	CAATTTTGTGACTTGGCCTGAGGACACCACAACAATTAAATAATAATAACTATTGATAAAATAACAATAATCATAACTATGATAAAACTACTAATAATGTTTAGTACAGCAGACATGAAACCTACACTATAAAGTACATATTGTATCTAAATATGTATATGCAAAAGTATAATTAGTAAGCAAACACACACCCACACAAACACA
HD3A1001	E09	HD3100029	probe	FBgn0039904	Host cell factor	Hcf	205	TACGCACCGTGAAAGGAAAT	GCAAAACTGTGATTCTCGGC	TACGCACCGTGAAAGGAAATGCAAACCTAATTTGTAGCTGTCTACAATAATCAAGTTATATATATATATTATCAAAACAATAAATTGCTGGCCATAATATGGAAGGCTCAGACTTTGTGGATCCAGCCTTTTCTTCAGGAGAACGAATATCGGCATCTGATCTCAATTCGGAGCATATTATTCAGGCCGAGAATCACAGTTTTGC
HD3A1001	E10	HD3100125	probe	FBgn0003612	Suppressor of variegation 2-10	Su(var)2-10	211	GAGGATGCTGACTGCGAAAT	TGACCAGGTTGTCATAAATGG	GAGGATGCTGACTGCGAAATAGCCACCACTATGCTGAAGGTTTCCCTTAACTGCCCGTTGGGCAAGATGAAAATGTTGCTGCCTTGTCGAGCATCAACCTGCTCGCATCTGCAATGCTTCGATGCCAGTCTCTACCTGCAAATGAATGAGCGTAAGCCCACGTGGAACTGCCCTGTATGCGACAAGCCGGCCATTTATGACAACCTGGTCA
HD3A1001	E11	HD3100030	probe	FBgn0030276	Dynein light intermediate chain	Dlic	220	CGGACTACATGACCACGCT	GCATCCTTCTCAACGACTAGC	CGGACTACATGACCACGCTAGAGAAGGAGTACGAGTATCGTGACGAGCACTTTGACTTCATCCAGCAGTGGATACGTAACTTCTGCCTGCGGCATGGCACTTCGCTCTTCTACACGAGCGTCAAGGAAGACAAGAACTGTGATGTCCTCTACAAGTATCTGACGCATCGAATTTATGGTCTACCATTCCGTACGCCAGCGCTAGTCGTTGAGAAGGATGC
HD3A1001	E12	HD3100126	probe	FBgn0030855		CG5800	205	GCGCCTTCCTCTCCTACATA	GGATTGATCGATTTTGCGTT	GCGCCTTCCTCTCCTACATAAAATCCGTGTTCCTGATGCGCAACAAGCGCTTGTTTAATGTGTTCAGCCTGGATCTAGATGCATTTGCCCAATCGCTCGGCTTGGCGGTTACGCCGCGTGTTCCCTTCCTCGAAAAATTCCTGTGGCGCCAGAAGCAGCTACAGCAGCAGAAAGAACAGGGTGATAACGCAAAATCGATCAATCC
HD3A1001	E13	HD3100031	probe	FBgn0003169	punt	put	201	GGCAGTAGCCTGTGTGCAT	TTAAAACGCATGCACGTTTG	GGCAGTAGCCTGTGTGCATATGTAAACTGTTGAAAATTATCGTCAAGCCTTTTAAAGTATAATTTTATTTGTACGTTATCGAATGTCTTCATATAGTAGTAGTTTTATATTTAAAGTTATTTTCAAAATAGATTTAACAATTTTAGTTTACTTTTTAGTTGTAACGTTTTTATTTCGCGCTCAAACGTGCATGCGTTTTAA
HD3A1001	E14	HD3100127	probe	FBgn0024920	Ts	Ts	202	CTCGATTTATTTTGCGGGAA	CTGCTCTCCATTTGCGATG	CTCGATTTATTTTGCGGGAAATATATACATACATTATTTTTGCGAAATGGTTTTAACACCAACGAAAGATGGGCCCGACCAGGAGAGCATGCCGTTGCCGGCCGACAATGGGGAGTCACCAAGTAAACAGCAGGCCCCTGTCAATCGGGATGAGATGCACTACTTGGATCTTCTGAGGCACATCATCGCAAATGGAGAGCAG
HD3A1001	E15	HD3100032	probe	FBgn0041191	Ras homolog enriched in brain ortholog (H. sapiens)	Rheb	216	AGGGCGGCTGAGTAGCTAAA	CGCATTCAGATCGCTTGATA	AGGGCGGCTGAGTAGCTAAAACTACGGCCGAACTGTTGGAAATACGGCAAATCGCTATGGCAATACGAAAATCGATTATCTCTTATCTACACAGTTGGGTCAGCGTGCATGGCGGGGCCGTACCCTTTGTGCGCAGCAGGAAAATCTAAAAATCTAATAGACCTAGTATTCTTAAGACCACACAGCAAGTAACCAATATCAAGCGATCTGAATGCG
HD3A1001	E16	HD3100128	probe	FBgn0022069	Nnp-1	Nnp-1	214	AGCAAAAAGTGGCTGCCTTA	ATGCTAGAACGCACCTTTGC	AGCAAAAAGTGGCTGCCTTAGATAAGATGGAGGACGAGGTCTTTGCAACCGGAAGAAAACTGAAGAAGCTCAACAAATCCAAACGCAAACGCCTACTGCAGTCCATTAACTTTGAGGAGGTGGACGAGCACAACTACGATGAGGTTATTAGCAAGGCTCTGCCTCCTGAGCTGCAGAAGAAGGTGAATTACAATGCAAAGGTGCGTTCTAGCAT
HD3A1001	E17	HD3100033	control_rho1	FBgn0014020	Rho1	Rho1	156	TTTGCAGAACTTCCAATGACG	CTCGATGTCGGCCACATAAT	TTTGCAGAACTTCCAATGACGACGATTCGCAAGAAATTGGTAATTGTCGGCGACGGTGCCTGCGGTAAAACTTGCCTTCTGATTGTCTTCAGCAAAGATCAGTTCCCCGAGGTCTATGTGCCCACCGTATTCGAGAATTATGTGGCCGACATCGAG
HD3A1001	E18	HD3100129	control_rho1	FBgn0014020	Rho1	Rho1	156	TTTGCAGAACTTCCAATGACG	CTCGATGTCGGCCACATAAT	TTTGCAGAACTTCCAATGACGACGATTCGCAAGAAATTGGTAATTGTCGGCGACGGTGCCTGCGGTAAAACTTGCCTTCTGATTGTCTTCAGCAAAGATCAGTTCCCCGAGGTCTATGTGCCCACCGTATTCGAGAATTATGTGGCCGACATCGAG
HD3A1001	E19	HD3100034	probe	FBgn0031874		CG13775	209	CAGCCACCGCTGAAAATAAT	ATCAGGGGATCCATGTTCCT	CAGCCACCGCTGAAAATAATCAAAGTGTCATCCACATCGTCCCAGAAGAATGAATCAAAGATCGATAGCATTCTGGATAGCATACTGACAACTGGAACGACGAACACTCAACAGCCAAATACGTCAATGGGCTCCCAGTCTCAGATTAAGAATCTGCTATATCTATACAACTCCGAACCCAGAATCGATAGGAACATGGATCCCCTGAT
HD3A1001	E20	HD3100130	probe	FBgn0015268	Nucleosome assembly protein 1	Nap1	225	CCGACTTCGAAATTGGTCAC	CATCAACCTACTGATTCGGG	CCGACTTCGAAATTGGTCACTTCTTGCGCGCCAGAATTATTCCAAAAGCAGTGCTTTACTACACTGGCGACATCGTCGACGATGAGGACGATGAGGACGAAGAGGAGTATGACGAGAACGAGGAGGATGAGTACGACGACGACGATGCACCGCCACCAAAGGGCCCCAAATCAGCCGGTATCAAGAAGCAGTCGCCCAACGACTGCCCGAATCAGTAGGTTGATG
HD3A1001	E21	HD3100035	probe	FBgn0004419	maternal expression at 31B	me31B	209	AGTTGCCGATATGTCGCATT	CCTCCATCAGGTTGATCTCG	AGTTGCCGATATGTCGCATTGCAGAATATTAGTTTTGGATGAGGCCGATAAGCTATTGTCGCTTGATTTTCAAGGCATGCTGGATCATGTTATACTAAAGTTACCAAAGGATCCACAGATCTTGCTATTTTCCGCAACATTTCCACTAACAGTCAAGAATTTCATGGAGAAGCATTTACGCGAGCCTTACGAGATCAACCTGATGGAGG
HD3A1001	E22	HD3100131	probe	FBgn0037478		CG2656	207	TATGCGATGGACTGCAAGAG	CTGTTCCTTCAGCCATTCCT	TATGCGATGGACTGCAAGAGAAATGTTCAGGTGGTGAACCTCGATCCGGCGGCAGAGCACTTCACCTACAACCCGCTGACGGACATTCGCGATCTAATCCACCTGGACGATGCCATGGAGGACGAAGAGCTGCACTACGGACCGAACGGCGGCCTCATCTTCTGCCTGGAGTTCTTGATCGAGAACCAGGAATGGCTGAAGGAACAG
HD3A1001	E23	HD3100036	probe	FBgn0000617	enhancer of yellow 1	e(y)1	223	ATATGTACGTGCACAATTTCAATG	TGAACTCCAGCAGTTGGTTG	ATATGTACGTGCACAATTTCAATGGAATAAACAATCTTCTTGCAGCAAAGCCGACGTAAACATAATAACTATAGAAGTATGAGCGCAGAGAAGTCCGATAAGGCCAAGATCAGTGCCCAAATCAAGCACGTGCCGAAGGACGCGCAGGTGATCATGTCCATCCTGAAGGAGCTGAATGTCCAGGAGTACGAGCCGCGCGTGGTCAACCAACTGCTGGAGTTCA
HD3A1001	E24	HD3100132	probe	FBgn0002121	lethal (2) giant larvae	l(2)gl	204	CAGCGCTGGTGTCTTTCAT	CCATCCTTGCATCAGGCTAT	CAGCGCTGGTGTCTTTCATTTCCGTTCGTATGACCGTTCAAAGATTATAAAAAAATTGTCGTGCCCACATTTTTTAAATTTCTTTTATTTTCGGTTAAAATATTGTGATACAAAAAAATGCCCTTACAAAATTAGGACAACAACAATTTGCTTTATTATGATGAACAAATTAGGAGTACAAAAAATAGCCTGATGCAAGGATGG
HD3A1001	F01	HD3100217	probe	FBgn0003886	alpha-Tubulin at 85E	alphaTub85E	113	CTGGGGGAAGATGAGGAATA	CGAAACTGTTTTATGCATTGG	CTGGGGGAAGATGAGGAATACTAGAGAAAACGTTGTCAACAAATGATACAGCCATTACAACTTTATAAACATCACTTTCTTTCTACCAAATACCAATGCATAAAACAGTTTCG
HD3A1001	F02	HD3100313	empty
HD3A1001	F03	HD3100218	probe	FBgn0030086		CG7033	204	CAGGACAACTCGTCCAGTGA	GAACGAGTCTCCCAGTGTGC	CAGGACAACTCGTCCAGTGACGAGAAGTTCCGCAACGACCTGCTGAACATTGCCCGCACCACGCTCTCCTCGAAGATCCTGCACCAGCACAAAGACTTCTTCGCCAATCTGGCGGTGGATGCTGTGATGCGTCTGAAGGGCTCCGGCGAGCTCAAGTCCATACAGATCATCAAGAAATCGGGCGGCACACTGGGAGACTCGTTC
HD3A1001	F04	HD3100314	probe	FBgn0011836	TBP-associated factor 2	Taf2	204	CCTTATCTACGCGCTACCCA	GGGATGTAATAAAGCAGCCG	CCTTATCTACGCGCTACCCATTCAGTTGCTACAAACAAGTGTTTGTAGACGAATTGGACACGGACATAAGTGCCTATGCCACTATGAGCATTGCTTCGGTGAATCTGCTGCACTCCATAGCTATCATCGATCAGACCTATATATCTCGAACCTTTATGTCGCGCGCTGTGGCTGAGCAATTCTTCGGCTGCTTTATTACATCCC
HD3A1001	F05	HD3100219	probe	FBgn0011660	Pms2	Pms2	202	AATCCCTGCTGGACACCTTT	TGGGTGAGCACATCCATAAA	AATCCCTGCTGGACACCTTTGGCCAAACTCCAGCTACATTTCAAATGCAAAACACCACAATTGTGAGCATGCTGGAACCCAAGACAAATTCTGGTAAAACTAAATTCCCTAAAGAATCAAGTAAGGACGACCAACACGAAGAAGTATCCGAAGAAGATGTACCCACTACCTCCACGCAAAGGTTTATGGATGTGCTCACCCA
HD3A1001	F06	HD3100315	probe	FBgn0051111		CG31111	215	GACGACCCAGTGTCTCGAAT	GCTCTCAGTGTGAAAATTGGG	GACGACCCAGTGTCTCGAATGGAAAAAACGACGCCGCTGAAACCACAAAGAAATACAGTCCTGTAGTTTCGCATAAGAACCCCGTCGAAGATAAGCCAAAAAATGTTACAATTGTACGGAAAAAGAAGCCCATGTTTCCGATGAACCTAAATAATGTATTACTCCACTCACTGGGCGAGATTATATCAGTGAATCCCAATTTTCACACTGAGAGC
HD3A1001	F07	HD3100220	probe	FBgn0031537	sec5	sec5	216	GGCGGGTGAATATGACATTG	TGCTGCAGTTCCAGACTGAT	GGCGGGTGAATATGACATTGTGGTTAACGACTACTCGCGCGCCAAGAACCTCTTTGGCAAGACGGAGATTCCCATTTTCCGCAAGGTGCTCGAGGAGGTCGACCACAGGATTCTGTCAATAAGGAAACAACTGCACGAGAAGGTGGTCAAGATGCCACAGAGCGTGGAGCAACAGAAGAAGCTCATCAAGGCGCTGATCAGTCTGGAACTGCAGCA
HD3A1001	F08	HD3100316	probe	FBgn0031452	Cwc25	Cwc25	221	CGACGATGACTTGGACAGAA	GCTTTCTCCTTGGCTCTTCC	CGACGATGACTTGGACAGAAAATTAGCCCGCCAAGTGAGCAAACTCAAGGGAGACCAAGGTGACCTTAAACTGGACAAGCTGCTGGACGCCAAGTACCGCACCATTTCAAATCAATTAGACATGGCCACCAAGAAGAAAAAGAGCAAGAAATCCAAGAAGAAGAAAAGCAGCGATAGCAGTGACGAAAGTAGTGACGAAGAGGAAGAGCCAAGGAGAAAGC
HD3A1001	F09	HD3100221	probe	FBgn0036843		CG6812	201	GCAGTTGTTCCGTGTGTCAT	CCCATTATGTGCTAGCCCTG	GCAGTTGTTCCGTGTGTCATGTGTCAATTGTCGTAGTTGCTAAGCTAAAAGGAATCTCAGCTGTTTTAAAATGTAAATCTCGGACCTGCTAGGTTTTTCTAATTTGTTAAATTGTATGATAAGTTATCATATCTAGTGACATCCACATCCAAAAAAATGTATTTGCTCATAAGAACCTTAGCAGGGCTAGCACATAATGGG
HD3A1001	F10	HD3100317	probe	FBgn0261238	Alhambra	Alh	207	GCAGCTGCTCTCAGCAATTC	GCTGCTGTTTGGGTTGATCT	GCAGCTGCTCTCAGCAATTCTCAACAGGATCTCAAGGATGTGCGCATACTCCAGAATGGGGCGAGCAATACACCGGGCAATCCAGCTGGCAGCACACCAACGCCTCCTGCTACTCCCGCTTCGTCTAATGCTGTCAGCTCAGCCAGTTCGATCATTACACACACGGCCGCGCATATGCTGGGCAACCAGATCAACCCAAACAGCAGC
HD3A1001	F11	HD3100222	probe	FBgn0260397	Suppressor of variegation 3-3	Su(var)3-3	201	AGGAGATCATAGCCACCCAA	TGATCGTTTCCTCCATTTTGA	AGGAGATCATAGCCACCCAAACGAAGATCATTGAACAGCGTCGTCGACTGAAAACCCTTAGAGATACCATCGGCAAACTAAAGAATGAGCACTTGGCAATGATCAACCAGCGGAAACCCAAAGGCACGGATGGCGATCTGAAATACTGTTACCAAGAGTTTAACATTCGGAACACCCAGATCAAAATGGAGGAAACGATCA
HD3A1001	F12	HD3100318	probe	FBgn0002431	hyperplastic discs	hyd	201	TGGACTTTGTCTACTGCAAAACG	ACAAAGCATAGCTCCATACGA	TGGACTTTGTCTACTGCAAAACGAATTGCTTCCACTGTTCCTACAAAGACATGTACTAAAATACATTCTTGGGCGTAAAATTAAGTTCCACGACTTGGCATTTTTCGATCCAGCATTGTACGAATCTTTTAGACAAATTATTCAAAATGCCCAAACAAAGGAAGGCGAGGAAACTATAAATCGTATGGAGCTATGCTTTGT
HD3A1001	F13	HD3100223	probe	FBgn0040339	Mediator complex subunit 22	MED22	204	CTGGTGGCCGACCTAAAAC	CCCCTCCTAGCGCTACTTAAA	CTGGTGGCCGACCTAAAACAGTACCTAATCCTCAACGACTTTCACTCGGTCAACGAGGCCATCACAAACAATTCGCAGCTGTTCAGGAACACACAGAGCGAGTGCGACAAGAAGCTGATGAAACTTAGGGACGAAATGGCCATGGACTTGTACGACCTGGAGGAGGAGTACTACACCAGCATTTTTAAGTAGCGCTAGGAGGGG
HD3A1001	F14	HD3100319	probe	FBgn0038390	Retinoblastoma-family protein 2	Rbf2	222	CACCCATGATCTACCAGCAA	GGTCCCAAAATTTTCTGCAA	CACCCATGATCTACCAGCAAGTCTTCCCCTAAGCATTATAAAAGCATTCCCCAAGAAGGAAGACGCAGATAAAATTGTAAATTATTTAGATCAAACTCTGGAAGAAATGAATCGGACCTTTACCATGGCCGTGAAAGATTTTTTGGATGCTGAGTTGTCTGGAAAACGATTCCGCCAGGCCAGAGGCCTTTACTACAAATATTTGCAGAAAATTTTGGGACC
HD3A1001	F15	HD3100224	probe	FBgn0034691	synaptojanin	synj	204	CTGGCCAGACGTACTCAACC	CGCTCGAATCGGAATCTTT	CTGGCCAGACGTACTCAACCCAATTGCACCGGATTTGCCGAGGGCGAAGAATGAATATAATGAAGTATATGGGCGACAAAGTATTACACTAATCTGCATAAATGTAATGTTTAAATAAATTATAGCCGTACTAGTCAAATTATGAAGTAAAGTTATAAAAACTGAAGAAGCAATAGAACTCTGTAAAAGATTCCGATTCGAGCG
HD3A1001	F16	HD3100320	probe	FBgn0038965	mob as tumor suppressor	mats	213	GTCCCTCTCGCACTTTCATC	TTGGGAAATGACAATGATGG	GTCCCTCTCGCACTTTCATCAACTGTCTCTGTGTGTGAAAGCAATTTTATTTTTATTTATAACAAATTTTTTGCGTTTATAAACACAACAGAATTAACTAGTTGGCTCGGCACACTTCCTGGAACCGCTCGCATCAGCTGTTGGGCTACGGCACTAGTTAACAGACCGACCAACTGGAGGCCAGATACAGATACCATCATTGTCATTTCCCAA
HD3A1001	F17	HD3100225	control_rho1	FBgn0014020	Rho1	Rho1	156	TTTGCAGAACTTCCAATGACG	CTCGATGTCGGCCACATAAT	TTTGCAGAACTTCCAATGACGACGATTCGCAAGAAATTGGTAATTGTCGGCGACGGTGCCTGCGGTAAAACTTGCCTTCTGATTGTCTTCAGCAAAGATCAGTTCCCCGAGGTCTATGTGCCCACCGTATTCGAGAATTATGTGGCCGACATCGAG
HD3A1001	F18	HD3100321	control_rho1	FBgn0014020	Rho1	Rho1	156	TTTGCAGAACTTCCAATGACG	CTCGATGTCGGCCACATAAT	TTTGCAGAACTTCCAATGACGACGATTCGCAAGAAATTGGTAATTGTCGGCGACGGTGCCTGCGGTAAAACTTGCCTTCTGATTGTCTTCAGCAAAGATCAGTTCCCCGAGGTCTATGTGCCCACCGTATTCGAGAATTATGTGGCCGACATCGAG
HD3A1001	F19	HD3100226	probe	FBgn0027568	Cullin-associated and neddylation-dissociated 1	Cand1	221	CGATCAAAGAAACACCGGAA	CAAGTCGATCTGCATTTATTTCT	CGATCAAAGAAACACCGGAATTAAACAAGATCTTCGAGTACATACAGAAGGATTCCATCACCGGTAGCTCAGATATTATAGTAATGGATCAGAGTTAAAAGGGAAACTTGGTTTCAAATTCCTTTACTTAATTAAGAATATGCGTTTGCGCACAAACAAGTATCTCTTTTTCTGATATAGCTTTTAAATTTTCTAATAAGAAATAAATGCAGATCGACTTG
HD3A1001	F20	HD3100322	probe	FBgn0261618	La related protein	larp	201	CCACCACGAACAACAACATT	CGGAGAAGTTTTCGGTGAAG	CCACCACGAACAACAACATTAAATCTGGCAATGCTGCTTACTCCAAAACCCACTCCAAATCCTCATCCAAAACAGCTGCTCCGCCATCCGCTCAGTGCCATGCCGAAAAGGAAGAACTAGACTTCCAGTTTGACGAGGAGCTAATGGACCCCCTACCCCCTGGAACCGGACGCATCAACAACTTCACCGAAAACTTCTCCG
HD3A1001	F21	HD3100227	probe	FBgn0263757		Rpb4	225	TGCAGAAAAAGCTGCACAAA	TTTATTGTGTAAGTGGACCATGA	TGCAGAAAAAGCTGCACAAATTCGAACTGGCGGCACTGGGTAATTTGTGTCCGGAGGCGCCCGAGGAGGCCAAGGCGCTGATTCCTTCACTAGAGGGTCGCTTCGAGGATGAGGAGCTGCGCCAAATACTCGACGATATCGGCACTAAACGCAGCTTACAATACTAATTACTACTACGTATAAATATAGTTTAGATATAAAGTCATGGTCCACTTACACAATAAA
HD3A1001	F22	HD3100323	probe	FBgn0263231	belle	bel	211	GACCGCATCTATCGATTCCT	ACACAATTCCCTTTGTTCGG	GACCGCATCTATCGATTCCTCATCGATATACGTGCTAAAGCAGCCCTGATTTTTTAGACACGCGTCTGAAAGCGGAAAAAAACGTGAACTCGTCGGAGAAGCAGCATTTTCCAAGCCCATAGCGCTTGTAATTGTAATTGTTGGCACAAGCAGGCCAGCCAAATCCGATACGGAAACGTCTCAGTTTCAAGCCGAACAAAGGGAATTGTGT
HD3A1001	F23	HD3100228	probe	FBgn0030833		CG8915	215	CTGTAATGGATGTGGAGGGG	TTCCAATAGCGAAACGATCA	CTGTAATGGATGTGGAGGGGCGCAGCTTCGAGGTGTCGATCTATCATCTAGAGGACATTCTTAGTAAAACTGGGTACATGCACCCGAGAATGGAGAAGTTTTTGGGCAAGCCGACAGGCAAAGAAACTCCTAGCGAACTACTAGCCGCCTATTATGGAGGTAACACAATCGTACATCCGGATATCGACAATGACTTGATCGTTTCGCTATTGGAA
HD3A1001	F24	HD3100324	probe	FBgn0019972	Ice	Ice	220	TTGCCAACTGAACAAAGACG	GTTTGTTTTCGTTTTGGACGA	TTGCCAACTGAACAAAGACGATCTCAAAATTTTAAATTCTCTACTAAACCTTATCATAGAACAACTTGCGCCTCTTTGATTCTCGATCAGGAATGTCGGCCCACCCTTATCTATATCTACCTTAGACCATTTACAGACAAGACCTTTTTACAATTTTATACACATAGATATCTTTATAGTATAAGCCTGTGTGTCATGGTCGTCCAAAACGAAAACAAAC
HD3A1001	G01	HD3100037	probe	FBgn0033122		CG17002	207	TAAGATTTGCCACCACAATCG	CTACGGGAATCAATGGTTGG	TAAGATTTGCCACCACAATCGGAAAGTAGCTATTTTCTAGCTAGCTTTGCCCATTAATCGATTGGTGGCAACACTGGTCGGCACATCCCACTCACTCAACAAATTGTTTACCACAAAAAACCGTGCTGAAAGTGAACGAAAATAAAGTGCAGCCCGGCGTCGAGCATTTGCAGTGATCCCAAGACGCCCAACCATTGATTCCCGTAG
HD3A1001	G02	HD3100133	empty
HD3A1001	G03	HD3100038	probe	FBgn0031390	tho2	tho2	202	CATTCTGGACAGCGAAACCT	TAGCTTGGTTTTGACCTTGATG	CATTCTGGACAGCGAAACCTCCCTTATAACCGATGGACTTCAGGAAGAACGACATGCCTTTGTGCAACTTGTTAAAGACTTGGACAGGGTGATTCCAGAAAGTCTTTTGAAAGAACGTTTGGAAATCGATACGTTGCAGGAGGCGGGAATCGTCAAGAACAAGAGCTTTTACTCTAAGTTCATCAAGGTCAAAACCAAGCTA
HD3A1001	G04	HD3100134	probe	FBgn0033846	Myb-interacting protein 120	mip120	219	GGTGTCGAGGGTCAGAAAAA	CTTGGCAAAAGCGATGATCT	GGTGTCGAGGGTCAGAAAAAGGACAAAGCTAAAAACAAGCAATTGAACGAGAATCGCGCAAATATATATTTTACGGACGATGTCATTGAGGCGACCATCATGTGCATGATATCGCGGATTGTGATGCACGAGAAACAGAATGTGGCCGTGGAGGACATGGAGCGCGAGGTTATGGAGGAAATGGGCGAAAGTCTGACACAGATCATCGCTTTTGCCAAG
HD3A1001	G05	HD3100039	probe	FBgn0000568	Ecdysone-induced protein 75B	Eip75B	216	CTGCTCACCCAGGACGATAA	CAGGTTCATCGAGTTCATGC	CTGCTCACCCAGGACGATAAGTTCACGCTCCTGAAGGCGGGACTCTTCGACGCCCTGTTTGTGCGCCTGATCTGCATGTTTGACTCGTCGATAAACTCAATCATCTGTCTAAATGGCCAGGTGATGCGACGGGATGCGATCCAGAACGGAGCCAATGCCCGCTTCCTGGTGGACTCCACCTTCAATTTCGCGGAGCGCATGAACTCGATGAACCTG
HD3A1001	G06	HD3100135	probe	FBgn0032940	Mlx interactor	Mio	202	AAGTGGCCAGCATCCAAAT	CACTAATTGCTGCTTTGCGT	AAGTGGCCAGCATCCAAATCTGCATGGACCCTAACCGTTGATGCTGATGTCCTTGATATGAATTTATTTAATTCAATCTTTATTTTAACAAATAATTTTTGCTAACTGCTCAGCACTAATTGTACAAAATGCCTGATGAGCATATTTTTATACAAGAAATGGGCAACCGGCAACCAATAAATACGCAAAGCAGCAATTAGTG
HD3A1001	G07	HD3100040	probe	FBgn0032408		CG6712	219	CTGCGAGAGAAGGACCAAAC	GTTGCGAATCTTAACCAGGG	CTGCGAGAGAAGGACCAAACAGAGGTGGCCAATCTGAACGATTCCGACAACGAGGAGTTGCAAAAGGAACTCCAACTGGACGATTTCAGCTCGTACTTCGAACGTTCGTACGAGCCAAAGGTGCTGATCACTTTTGCTGACAATCCGGTGACCAAGACGCGTAAGTTTGGACTGGAGCTTTCGCGCATATTCCCCAACGCCCTGGTTAAGATTCGCAAC
HD3A1001	G08	HD3100136	probe	FBgn0001233	Heat shock protein 83	Hsp83	205	TCGACCGTATCACAACACTGA	CAAAACTTTTCAGACGCTGC	TCGACCGTATCACAACACTGATCTACCCTAGTATTCACAGGAAGTTGCATCCCTGGCATCCAGAAGCCTCTAGAAGTTTCTAGAGACTTCCAGTTCGGGTCGGGTTTTTCTATAAAAGCAGACGCGCGGCGTTTGCCGGTTCGAGTCTTGAAAAAAATTTCGTACGGTGTGCGTCGTAACAACAAGCAGCGTCTGAAAAGTTTTG
HD3A1001	G09	HD3100041	probe	FBgn0029173	fu2	fu2	202	TTGGATAATTTATTGCAATCCC	CCAGAGACTCTTGGAAACCTCT	TTGGATAATTTATTGCAATCCCGGCTTAAATGCATATGATTGAAGAATGCATACATCGGATATCAGCATGACCCAGGATCAGGATGTGAGCACTTGTCGCCTGTGCCACCATAATACGGATCCCAACTCGCTAAACATTTTCGATGACACCGTGCAGTTTTGCAAGGATGTGTCCATTGCAGAGGTTTCCAAGAGTCTCTGG
HD3A1001	G10	HD3100137	probe	FBgn0026577		CG8677	219	GTTTGAACGCAATGCCAAGT	CGCAGCCTTGAAATGAGATT	GTTTGAACGCAATGCCAAGTTTCGGGCCCACATCCTCACCTTGAATGCCGATACTTTACGCTCTGAGCCAATTGGAAGGGACCGGTTGGGACATGCCTACTGGCTGACTCAGGATGCCCACTGTAATCTGCGGATCTACCAGGAGCATCTAGACGAGGAAATTTGGCAGGTGGTTGCCACGAACAGGGACGAGTTTGTAAATCTCATTTCAAGGCTGCG
HD3A1001	G11	HD3100042	probe	FBgn0033194	Vacuolar protein sorting 13	Vps13	204	TACCGCAGCATAAACGACAA	CGACACGTTGATGATAATGTCAC	TACCGCAGCATAAACGACAAACAGATTGTAAACGGACAGATCGATGCTCTGAAGATGTACATGTGTGCTTTCCTACCAGAGCGGCGAGAGATGACGCGTCATTATATCCTTCACCCGTGCGTTATTAGCCTGCAAGGATCAACTCCCGAAGAAGAGGGCATGCACATTAGCCTAAAGCTCAGTGACATTATCATCAACGTGTCG
HD3A1001	G12	HD3100138	probe	FBgn0015396	jumeau	jumu	208	CAAGGAACAACGGTGTTGAG	GTATGCCGCTCGAATAATCC	CAAGGAACAACGGTGTTGAGACTGAATATATTTTTTGTGCGCTGTTTCGAAATAGAACCGTTAATTGGAATTGGCAGTAAGAAGCAGAGAGGCGGACGATATTCCGGTGAAATCTTCGCCAGGCGGAAACATCGATCAAAACAAAGTGCATGCTAAAAACATAAAAGATTCAACATGTTCGAACTAGAGGATTATTCGAGCGGCATAC
HD3A1001	G13	HD3100043	probe	FBgn0030081		CG7246	221	CACCAGAGCATCACCGACTA	ACAGGATTTGACTTCCTGCTG	CACCAGAGCATCACCGACTACCTGGACTTCATACTGTACGAGAAGCACATGCACATGACCATCGTGGACAAGGAAAAGAAGATGCACGTTAAACTCACCGGTCTAAAGGCCTCCATAGCCACGCGGATCATGCGCCTGTACAGAGAGGCCTTGGCTAAGTTTAACCACGACAGACGGCTGTGGAGCAACTGGATCAAGTTCAGCAGGAAGTCAAATCCTGT
HD3A1001	G14	HD3100139	probe	FBgn0261266	zucchini	zuc	207	CTCACAGCCACGTTTCAGG	TGTGTGAAGATCAAGCTGCC	CTCACAGCCACGTTTCAGGCGGAATTCCAACGAATGTGGCGGGCTTTTGCGAAGACCGAGGGGAGCCAAATCCAGCTCAAGTAGAAATCAATTGATTTAATGTATGACTACCAAACAGTTCCTCAGTATGCCAAATAATTATAGTTCTTATTTTCTAAGTGCCTTCAATTAAACTAAAACTTTTTAAGGCAGCTTGATCTTCACACA
HD3A1001	G15	HD3100044	probe	FBgn0035520		CG11586	106	GGCTTCGGTGGATCAAAGA	CGCGTCGTCTTGTGGTTAGT	GGCTTCGGTGGATCAAAGAAGAACTCGTAGGAACTAAGTGTTGAACTGCCCCTCCCCTCCAATTTTAGCTGTACCATGAAATAGAAACTAACCACAAGACGACGCG
HD3A1001	G16	HD3100140	probe	FBgn0010397	Lamin C	LamC	217	CCAGGAACTGCGTGATCAGT	ATTCAAGCCAGCATTGGTGT	CCAGGAACTGCGTGATCAGTACGAGGGTCAAATGCGCATCAATCGCGAGGAGATCGAGCTGCTGTACGACAATGAGATCCAGAACCTCAAGGCTGCTGCCAATAGGGCTGCCCAGGGATCCGCTCTTGCCACCGAGGAAGTCCGTCTCATGCGCACCAAGATCGATGGCTTGAACGCCAAGCTACAGAATCTGGAGGACACCAATGCTGGCTTGAAT
HD3A1001	G17	HD3100045	probe	FBgn0031344		CG7420	203	CGCTGCAATACGGTGAAGAT	AACTGACGCACATCCTCCTC	CGCTGCAATACGGTGAAGATACAGGTCCACAATCCCAACGAACTGCGGATAGTTTCCATTTCGAGTGGTCAGAACCACATGGTGCTCAAGTGCGCGGATCTAAGCGAAACGGGTGGAGGCAGCACCAAAAGAATCCTTACCTTGGGTGACAACAAGTTTGGCCAGTCCAACGCCTTTCAGTTTGAGGAGGATGTGCGTCAGTT
HD3A1001	G18	HD3100141	probe	FBgn0038766		CG4854	201	CGGAGCCGCACAAATTTTA	TGTGCAGCGTTTGATTTTATC	CGGAGCCGCACAAATTTTAATTGTTTGGTCAGTAAACAAACAAAAATTAAATATTTCGGAATTTGTACCTACAATAACAGAAGAATGCATACCAACGTGGATAGCAGGGACCTTAAGTGTCGCATCTGCTTGGTGCAGCCTAAGGATGAGTCTCTCATGCCCACGGAGCCCGATTTTCCAGATAAAATCAAACGCTGCACA
HD3A1001	G19	HD3100046	probe	FBgn0011642	Zyxin	Zyx	209	CGCTGCCTCGTGAAAGTTAT	TTCGGTGGGTATTGAAATGT	CGCTGCCTCGTGAAAGTTATAATCTGCATAATTCATACGTTAATGATAATAATCCAAACATTTCCCATGAATACAATATTTCGAATTCGATTGAAGCTAACCAAACACTATACATACATGGTAATGCTAGAACTACATTTTATGACGTGAACAGCATCCATAGAAATGATAAGGAAGGTCTAAAAAATTACATTTCAATACCCACCGAA
HD3A1001	G20	HD3100142	probe	FBgn0020304	drongo	drongo	213	CGGTCAACCTGAAGTCGTC	TGTTTTGGCTGTTGTTCTGG	CGGTCAACCTGAAGTCGTCTGCTCCGGCGACGAACCACACTCAGAATGGCCACCAAAATGGGTATGCCAGCATCCATTTGACGCCTCCTGCTGCCCAGCGGACCTCGGCCAATGGATTGCAGAAGGTGGCCAACTCGTCGAGTAACTCTTCTGGAAAGACCTCATCCTCGATCAGTAGGCCACACTATAATCACCAGAACAACAGCCAAAACA
HD3A1001	G21	HD3100047	control_pvr	FBgn0032006	PDGF- and VEGF-receptor related	Pvr	175	AGGTATCCATCTGACGGTCG	AAGTACGCCAATGTCGGTTT	AGGTATCCATCTGACGGTCGTAGCTGTAGGTGGCTGTTCCGGATCCGGTTCGTCCGGCTCGGGTGCCCGATCGGGGATCATTGTCCGAATTTCTGCGATGAGTTGGCGGTTGCGTGTTATTGTTGTGCGGCTCATTAATGTAAGAGTGGATCGGGAAACCGACATTGGCGTACTT
HD3A1001	G22	HD3100143	control_pvr	FBgn0032006	PDGF- and VEGF-receptor related	Pvr	175	AGGTATCCATCTGACGGTCG	AAGTACGCCAATGTCGGTTT	AGGTATCCATCTGACGGTCGTAGCTGTAGGTGGCTGTTCCGGATCCGGTTCGTCCGGCTCGGGTGCCCGATCGGGGATCATTGTCCGAATTTCTGCGATGAGTTGGCGGTTGCGTGTTATTGTTGTGCGGCTCATTAATGTAAGAGTGGATCGGGAAACCGACATTGGCGTACTT
HD3A1001	G23	HD3100048	probe	FBgn0030556	mRNA-capping-enzyme	mRNA-cap	208	CCGTTGTGGACAGCATAAAG	TCTGATTAATTTCCTAATGTCGGG	CCGTTGTGGACAGCATAAAGCATCCAGTCACCAAGGAGTACCTACTAAACTTTATCGCAAGCTCTGGCTATCGGAATGATCATGTCATGATGCCGCCGCCGATCAATTCCCATAACCAAAACCACAACCATAACCACTTTTATCCCCATGGTCATGGCCAACACCAGCGTCGTCCCTGCGTGAACCCGACATTAGGAAATTAATCAGA
HD3A1001	G24	HD3100144	probe	FBgn0025382	Rab27	Rab27	212	CCAAAGCCGTTCCATTCTTA	CAGACTACAGGGCTCGTTGG	CCAAAGCCGTTCCATTCTTAAAGTTGCCCGAGGGATTATGTCTCGAGAGTGCTTCGAAGTACTCACGAAATAACCACGTTCCCGTGGGAAAGGACACCTGTGCGGCGCACCTGTCGCGCGCGGAAGCGCTTGAAAGCTGGCGCAAGCTTTGGCTGAAAGCTGAGCCTCGGAAAAGGGACTGCCTGTTGGCGGCCAACGAGCCCTGTAGTCTG
HD3A1001	H01	HD3100229	probe	FBgn0015239	Hormone-receptor-like in 78	Hr78	225	CAATGAGGCGGTCTTTGAAC	ATTAATGCTGGCCACACTCC	CAATGAGGCGGTCTTTGAACAGGATCTTCTCACCGATGTGCAGTGTGCCTTTCATGTGCAACCGCCGACTTTGGTCCACTCGTATTTAAATATTCATTATGTGTGTGAGACGGGCTCGCGAATCATTTTTCTCACCATCCATACCCTTCGAAAGGTTCCAGTTTTCGAACAATTGGAAGCCCATACACAGGTGAAACTCCTGAGAGGAGTGTGGCCAGCATTAAT
HD3A1001	H02	HD3100325	empty
HD3A1001	H03	HD3100230	probe	FBgn0002891	mutagen-sensitive 205	mus205	206	TGGGTTGTAGGACCCTTTACG	TCGATCTATCGATTGTTGCTTTT	TGGGTTGTAGGACCCTTTACGTAATTAAGTTTATACAAAAATTAGCATTGTCAAGTATAAAATTCCTTCATCTTGCACTAAAGTTTTTCTTAACATTGTTGCCAAGTTAGTTCTTTAAGTTCTAGAGCTCTTCTTTCAATTTAAAAATATTTATTTTACGTTTTTGCCCTTAGTTTGAATTCAAAAAGCAACAATCGATAGATCGA
HD3A1001	H04	HD3100326	probe	FBgn0028398	TBP-associated factor 10	Taf10	211	CTGCAGCACTGCAAGACG	ATTTGTGTGCCCAATTCAAA	CTGCAGCACTGCAAGACGCGCACCACGAACATCCAGCATTCCAGCGGACACAGTTCCAGCAAGGACAAGAAAAACCCCAAGGACAGGAAGTACACGCTGGCCATGGAGGACCTGGTGCCGGCACTCGCGGACCACGGCATCACCATGCGCAAGCCGCAGTATTTCGTTTAGATTTAGTTAAGCTCTAAAGTTTTGAATTGGGCACACAAAT
HD3A1001	H05	HD3100231	probe	FBgn0001965	Son of sevenless	Sos	208	CGCGATGCGGTCAAATACTA	GAACTTGTCGCTCCTTGGAC	CGCGATGCGGTCAAATACTATTTGCCCAAGCTGCTTCTGGTGCCCATTTGCCATGCCTTCGTGTATTTCGACTACATCAAGCATCTCAAGGATCTCAGCTCTTCGCAGGACGACATCGAGAGCTTCGAACAGGTACAGGGACTGTTGCATCCACTCCACTGCGATCTCGAAAAGGTAATGGCCAGCCTGTCCAAGGAGCGACAAGTTC
HD3A1001	H06	HD3100327	probe	FBgn0034033		CG8204	223	CTGCTTGCGTTTTGCATTTA	GAGCATTTGCTGCACTTGTA	CTGCTTGCGTTTTGCATTTAACTTTTTGATTGTTTACCTCCAAAAACATAACGCCGTTCCAGTGGAGCAGAAACGGCTTGGAACCCTCGATAGAGGCAAAAGCTGGAGGCTATAAAACTCGCACAGCTGAGTTTTATTTTGCACGCGACATTGAATTTGATGAGATGGAAAAATGCATTATTTGCGTAGATAACTTGAGAAAATACAAGTGCAGCAAATGCTC
HD3A1001	H07	HD3100232	probe	FBgn0004584	Recombination repair protein 1	Rrp1	210	GGTTATTGAGCTCCACCCAT	TTCAGCACCCGATATCAACA	GGTTATTGAGCTCCACCCATTTTGTACTACTAATGACGTCGAACTATTTGTACTACTAGTGACGTCACAATGTGCAATATTTGCTCCACAGTCGTGTTTTTCCAAGGAAGGCACACAAATAGTGTTGTAAGCAGACCAAAGTCAAGCCGACCGGCTTGCAAAAATCGCGTTGCCCGCGCAGTTTTCTTTTTGTTGATATCGGGTGCTGAA
HD3A1001	H08	HD3100328	probe	FBgn0086695	humpty dumpty	hd	217	CAGATGCGGAAGGAGAAGAT	ACAGATTAGGAAAACAAAGCTGC	CAGATGCGGAAGGAGAAGATGCCGCCGGGCAGGTCTTTGGCGAGCAGAATCTTTCGGAGTGTGGTCTGCTGCCGGCAGTAGTTGGCTCCATCTGCCGCACGGGCCAACATGCCGTAGGTCTTTTAGAGCGCGTTTGCTATCAAAGAGATGAGGGATATGCTTGGAGCTAGACACCAAGTGCTCCTCACACTAGAGCAGCTTTGTTTTCCTAATCTGT
HD3A1001	H09	HD3100233	probe	FBgn0025742	myotubularin	mtm	217	GAGTCAGAGGACGCGTACAA	TCATGGTCTCCACCTTGTCA	GAGTCAGAGGACGCGTACAAGAACGTGGAAATCAACTTCCTCGACATACACAACATCCACGTGATGCGGGAGAGCCTACGCAAAGTGAAGGAGGCTTGCTTCCCCACCACCGACGACTCAAAGTGGCAGACGGCTATTGACAACACACTGTGGCTAAAGCACATTAGGTGCATCCTGGCCGGCGCCGTTAGGATTGTTGACAAGGTGGAGACCATGA
HD3A1001	H10	HD3100329	probe	FBgn0034939	thoc5	thoc5	206	AGTTCTGGACCAACTCCCTG	CTTGATGTATTTGTAGGGGCG	AGTTCTGGACCAACTCCCTGCAGCCCAAACATTTGGAGCCCAACGACTGCATCCTGTACGCGCAGCTCTTCCGCACCATCTACAGCTTCGATATATTCCTCGAAACCGAGGGATCCATGCAAAACACCATTGAGTACAACAAGGAGAAGCCTTACATAAGCGCCTTCGCCAAGCGGAGCCGCTCACGCCCCTACAAATACATCAAG
HD3A1001	H11	HD3100234	probe	FBgn0024321	NK7.1	NK7.1	206	GTTAAATGCGCTGCTGGAA	CCAATTTCTCGGTTTGTTCG	GTTAAATGCGCTGCTGGAAAAGACAGTTAAAACGGCTAATCAAGCACATCGAAGTGCAGAATTGGAGAGCAGCGATCAAAAGCCCGCAGTCGAAAAAAGGCCAAATAATAGTAATGAAAATCAATTGCTACACCAGCGTTTGCATCAGCATGCCATACCTTTAACTGTAGAACCAGCCGCTCCACTCGAACAAACCGAGAAATTGG
HD3A1001	H12	HD3100330	probe	FBgn0036827		CG6843	207	AGAGCATAAGGGCCATTCAA	TTGATTTCCTTTTTGTGGGC	AGAGCATAAGGGCCATTCAACAGCAACATCAACTGGTGCCCAGCGATGGCGAGAAGGACGCTCATGCCGATGACCAAAATCCCGAACTAGTTTTTCTCAAATCCCTGTCCAAGAAACAAAAGCTAAAGCTGTTGAAGAAACTGGAGAAGATTGAACGAATGAAGCGCAAAGGCGAGGGCATCAAGAAGCCCACAAAAAGGAAATCAA
HD3A1001	H13	HD3100235	probe	FBgn0011770	GIP-like	Gip	201	CGAAGACGTATACCGCCAAT	GCAAATGCTGCAGGTGATAC	CGAAGACGTATACCGCCAATCTAAAGATCGCCGCCGATAGCCTTAGAGCCAGTAAAATGATCGGCGTGATAGAGCCAATTAACAAGTACGCCGTGCCTGGCTACTACATGAATTCATACTCCAAAGCCGCTGGAATTCTGGCCGATGTGGCTGCGGACAACATTCAATTGCTGGCCGATCTGTATCACCTGCAGCATTTGC
HD3A1001	H14	HD3100331	probe	FBgn0261797	Dynein heavy chain 64C	Dhc64C	223	TCCAAATTATTCCTTCAAAGCC	CGGAAATGGGGAACAGATT	TCCAAATTATTCCTTCAAAGCCTTTACCTAAGGTATCTAAAAGTTTAATCTAAAGCTATATTCGTACTCTTTTCATTCAAAAAACATTAGAATTTTACAAAATGTAATTTCAAGATTTAAAATGAAATACTTTAAACTTGTAGAGTTTATTTTAAAAATATTTCAATTTCTGTGGATAGCATGATTTTGTGAAAGTAATTTTTAAATCTGTTCCCCATTTCCG
HD3A1001	H15	HD3100236	probe	FBgn0031051	Ranbp21	Ranbp21	205	AGGCAATCCCAACCAGAAC	CGTTGTCTGTGACCAATGCT	AGGCAATCCCAACCAGAACACCAACACACCACAATCCCAGCTCACGCATTCCGCATTTCGCACACGGAACAGACCACACAACACACAGCACATAGCACATAGCACACACGCACACAGGTAGCGGCAGCTCTTTTAATCTTCCAAAACGTTGTCTGGCTCGCTGGCTGGTTGGCTGGCTCCACAAAAGCATTGGTCACAGACAACG
HD3A1001	H16	HD3100332	probe	FBgn0000181	bicaudal	bic	220	TTTCCCCAATTTCCGACTTT	AAATGCTGGAAATATGAATGGG	TTTCCCCAATTTCCGACTTTTCGATGTAACCCCGCCCTCAAGGAATCCTCAATTGAAAACGAAAACAAGCTGAGGCCACAATTTCGATTCGAGAACAATGTGCCCAAATTGTTGAAAGCATAGCTTATAATTTGTAAACTATTGTTTTAGACCATCATTACCATGCATAACATTAAATGAGCTGTAAAAACCATACGACCCATTCATATTTCCAGCATTT
HD3A1001	H17	HD3100237	probe	FBgn0033761		CG8778	209	GTTTTCTGCCGGTCGTTTTA	GAGCTCCATCCAAACGCTC	GTTTTCTGCCGGTCGTTTTATAATCAGCTTATTGCCTTTTCTTGCTTTCTTTTTATCTGTTTTCAACGTTAAAATGTCAATGTTAATAAAAAGAGCGTCTGGTTTAGCTCGACAGTTAGCCCGGCCACTTGTTGCATCACGTAATTTGGCGTCGGCAGCGCCCTATGGCGATGGAACTGAAGTTCTCGTGGAGCGTTTGGATGGAGCTC
HD3A1001	H18	HD3100333	probe	FBgn0013435	cdc2-related-kinase	cdc2rk	207	GCACGTGACACTCGTAGCAA	TAGGTCCTGCTCGCAGAAAT	GCACGTGACACTCGTAGCAATGAGATTGTGGCCTTAAAGAAGGTCCGCATGGATCAGGAAAAGGATGGTCTGCCAATTAGTGGACTCCGCGAGATCATGATCCTAAAGCAGTGCCATCATGAGAATATTGTCCGCTTGCGTGAGGTGGTGGTGGGCAAAAGCTTGGACAGCATCTTCCTGGTAATGGATTTCTGCGAGCAGGACCTA
HD3A1001	H19	HD3100238	probe	FBgn0027599		CG2790	225	GCTAGCCAAACGAACCAAAA	GGTTCCGAAACAGTTTGCTC	GCTAGCCAAACGAACCAAAAAAAACAAAAAGGCAAGGAAGTCAGCTGTCAAGCAAGCGCAGGCGGAAGGCAGTGACGAACCAGATGAGCCAATAGAAAAGAAGGCAATCAAGAGCGAGTCAGAGGATGAAGACTGGAGTAAAGGCAAAAAAGCGAGCAAAAAGAGTAAAAGCAAAAAGACGACGACTAGGAAGGTTAAGCTATTAGAGCAAACTGTTTCGGAACC
HD3A1001	H20	HD3100334	probe	FBgn0021796	Target of rapamycin	Tor	206	TCTGCGAGAAGATTCCCAAG	AGTCCGAGGAATCCGTCTTT	TCTGCGAGAAGATTCCCAAGTTTTTGAGTCCTTGATTCTAATCAACAACAAGCTGCAGCAAAGAGAAGCAGCGGAAGGTCTGCTCACAAGGTATCGTAATGCAGCCAACGAACTAAATGTTCAAGGAAGATGGTATGAAAAACTTCACAATTGGGATGAGGCGCTGGAACACTATGAAAGGAATCTAAAGACGGATTCCTCGGACT
HD3A1001	H21	HD3100239	control_pvr	FBgn0032006	PDGF- and VEGF-receptor related	Pvr	175	AGGTATCCATCTGACGGTCG	AAGTACGCCAATGTCGGTTT	AGGTATCCATCTGACGGTCGTAGCTGTAGGTGGCTGTTCCGGATCCGGTTCGTCCGGCTCGGGTGCCCGATCGGGGATCATTGTCCGAATTTCTGCGATGAGTTGGCGGTTGCGTGTTATTGTTGTGCGGCTCATTAATGTAAGAGTGGATCGGGAAACCGACATTGGCGTACTT
HD3A1001	H22	HD3100335	control_pvr	FBgn0032006	PDGF- and VEGF-receptor related	Pvr	175	AGGTATCCATCTGACGGTCG	AAGTACGCCAATGTCGGTTT	AGGTATCCATCTGACGGTCGTAGCTGTAGGTGGCTGTTCCGGATCCGGTTCGTCCGGCTCGGGTGCCCGATCGGGGATCATTGTCCGAATTTCTGCGATGAGTTGGCGGTTGCGTGTTATTGTTGTGCGGCTCATTAATGTAAGAGTGGATCGGGAAACCGACATTGGCGTACTT
HD3A1001	H23	HD3100240	probe	FBgn0029977	hold'em	hdm	220	GCCAGCTATCCGGAAGGTAT	CGAAAGCTAGCAAGAGACGG	GCCAGCTATCCGGAAGGTATGCTGCTCTCCGTTTGGCAACCCGACTGGATACAACGTGCCCAGCAATGGCAGCCACGTCGCACTGTCCTTCATTTGATCGACGTGCGTGTTTCCTACTCGAACTTTCATCGTTCTCTCGTCCTCTCCCATTCCAATTGCACACTTATTTGCGAAAATCCTCAGGCGGCTGGAGATGATTGCCGTCTCTTGCTAGCTTTCG
HD3A1001	H24	HD3100336	probe	FBgn0003888	beta-Tubulin at 60D	betaTub60D	201	GTGAAGTTGCGCCTTCGT	CCTGCAGGTTCACGATTTCT	GTGAAGTTGCGCCTTCGTTCTGAAACCTAATAAGCTGAGAATCAGAACCTCTGGACATCTGAACGTCTGAAAATCCAGCAGCAGCTACTCGGACCGTGCGGTGCATCCTTCTCCAGACTGAGACTAAGATCCGATTCCAGCCTTAGCCTTCGACCCCACAAATCGCCGCTTTCAAGATGAGAGAAATCGTGAACCTGCAGG
HD3A1001	I01	HD3100049	probe	FBgn0011659	Mlh1	Mlh1	225	CGGTCCGTTTTTCGTTTAGT	CTCCAGGCTGCAAATATTCC	CGGTCCGTTTTTCGTTTAGTTTTAAATTAAGTTATGTTTCTGCAATTTTTGTTCATTCGTCGTTTTATAAACGAAGTGATATCACAATTCAAATTTACCGCCTTACCGCATAGACCGTTTTATCTCTTGTATACTCCCGCGCAAACAAACGGGCACACTACTTTTTGTTTACATTAAACTTCGCGTGAAGATTTCCCGCCATGGCGGAATATTTGCAGCCTGGAG
HD3A1001	I02	HD3100145	empty
HD3A1001	I03	HD3100050	probe	FBgn0027356	Amphiphysin	Amph	213	GTCCCCGAAGTTTTGGAAAT	ATTTCGGGTTTCGTGTGATT	GTCCCCGAAGTTTTGGAAATTGTTTCAAGTAACAACATTAACGTTTAGCGATTACGTGTATCTTTAATTTGTACTTTGGTTTTTAATTTTTCGTTTGAGAGACTCGAACTAGCTACAGCTTTATAACGCGAACACAATCCAATAGTCACTAACCGATCGATTCGATGTTTTTATTTTATTTAACTCGATTGTAAATCACACGAAACCCGAAAT
HD3A1001	I04	HD3100146	probe	FBgn0002031	lethal (2) 37Cc	l(2)37Cc	201	GCGAGGGTACCCACTTCTTC	CACGCTCGTCGTAGTCCTG	GCGAGGGTACCCACTTCTTCATCCCATGGGTGCAGCGGCCCATCATCTTCGACATCCGGTCCCAGCCCCGCAACGTTCCTGTGATAACGGGCAGCAAGGATCTGCAGAATGTCAACATCACGCTCCGAATCCTGTACCGCCCCATTCCAGACCAGCTGCCCAAGATCTACACCATTCTCGGCCAGGACTACGACGAGCGTG
HD3A1001	I05	HD3100051	probe	FBgn0042085	Brahma associated protein 170kD	Bap170	220	AAGGCGGGTAAGCTTTCAGT	GCAATATTGGCGTGTCCTTT	AAGGCGGGTAAGCTTTCAGTGGTTAATCACATGCAGTTTCCTCGTCTAGTGCGGCTTATATTTAATCAATCGGTGGGACCAGTAATTGTACGGCACCTGGACGGAATAGAGCTACCTGGGACGTACTACGTAGGCATTAGGATGCGAGCTCAGCCGCTAGCCATGCAACAGAGACCCACCCCCAGCATTGTTCCTGTTAAAAAGGACACGCCAATATTGC
HD3A1001	I06	HD3100147	probe	FBgn0035630		CG10576	212	CGTTGCGTATTAGAGGACCC	TTGCTTTGCTTTTTCGTTGC	CGTTGCGTATTAGAGGACCCTTTTGACAACAGAACAGGACAGAAGAGAAGACGGCAACAATTTGAGGATACATTTCCCCAGAAATCCTCCATCCATCAACAAGGCGGGCGGTCGGTCGGTCCCGCGCCAACTTTACCTCTTTATTTCCTTTACTATAAGCTGCCTTCGTTTATCGGTCTGTTCAACATCATCGCAACGAAAAAGCAAAGCAA
HD3A1001	I07	HD3100052	probe	FBgn0027509		CG7261	205	TTCGGAATCGAAATCTCCAC	CCCAAAGGGATAGTTTGTGC	TTCGGAATCGAAATCTCCACCACGACGGACTTCTATTCCGTGGGCATCAGGCAGAATTCCTATCTAAACATCAGTGACTACATTGCACAGTTTGAGGTGTACAGGGAACCATTGATTAACCATCTAGTTCAGCATAAGGTAAGCCATTGGGATTCGGCTATAAGGGAGCTGACAGCCAAAGCCCTGCACAAACTATCCCTTTGGG
HD3A1001	I08	HD3100148	probe	FBgn0004811	female sterile (2) ltoPP43	fs(2)ltoPP43	204	TGATGCAGCCATTGCTAGTG	TGTTGCTGTTGCGATTCAA	TGATGCAGCCATTGCTAGTGCGCTGCGCAGAGATCGCCAGCGGCAGGAGGCTCAGGAGAACTCAAGGGAGCAGCGTTTCCGGGTCGTAAACTGCCTGCGCAGCACGCTCGAAAACAGTGCCGCAGAAGCGGAATGCCCGGAGAGCCAGAGTCATGAGTCCAGCAGCCACATAACCATCGTGGACATTGAATCGCAACAGCAACA
HD3A1001	I09	HD3100053	probe	FBgn0024956	Menage a trois 1 ortholog (H. sapiens)	Mat1	210	TTATCGAAAACATTGGCCG	GGATCCTTTGAGGAACAGCA	TTATCGAAAACATTGGCCGGCAAAGAGTTTTTATTTACGGATTTAAGCAGCAGAGAGGAGGACAGGTAAACCGGCTACGCGATGGACGACCAGGCGTGCCCGCGGTGCAAGACCACCAAATACCGGAATCCATCGCTCAAGCTGATGGTCAACGTTTGCGGACACACATTATGCGAATCTTGCGTGGACTTGCTGTTCCTCAAAGGATCC
HD3A1001	I10	HD3100149	probe	FBgn0033155		Br140	205	CTTGACCTCTACGGCCCTC	GTCCGGTATTCGTTCAAAGG	CTTGACCTCTACGGCCCTCGCAATGAACAGTAAGCTAAGCGCGAATCTGCCTGTCAAGTCGCCCAAAAGACCAGGACGCTATCGTCGGGTGCCGGAAGTGAGGCACAGCTCCTCCATGTCACCAAAGAAGTCGCCCAATCCGGCGGTGACCGTCAGCCAGGCACTACCCATGCCCGAGACCCTACCCTTTGAACGAATACCGGAC
HD3A1001	I11	HD3100054	control_rh6	FBgn0019940	Rhodopsin 6	Rh6	167	CCTGCGGCACTGACTACTTT	TGAAAGGCCAAAATCAATCC	CCTGCGGCACTGACTACTTTGCCAAGGACTGGTGGAACAGGTCCTACATCATCGTCTACTCCCTGTGGGTCTATCTCACGCCGCTGCTGACCATCATCTTCTAATATGACATTCGTTACTAATTATCCAAGGATTCTGTTTGATTAAGGATTGATTTTGGCCTTTCA
HD3A1001	I12	HD3100150	control_rh6	FBgn0019940	Rhodopsin 6	Rh6	167	CCTGCGGCACTGACTACTTT	TGAAAGGCCAAAATCAATCC	CCTGCGGCACTGACTACTTTGCCAAGGACTGGTGGAACAGGTCCTACATCATCGTCTACTCCCTGTGGGTCTATCTCACGCCGCTGCTGACCATCATCTTCTAATATGACATTCGTTACTAATTATCCAAGGATTCTGTTTGATTAAGGATTGATTTTGGCCTTTCA
HD3A1001	I13	HD3100055	probe	FBgn0051301		CG31301	203	CCCTGTAAAGATGTCCGTTCA	GGTCCTCCTCAAAACGATCC	CCCTGTAAAGATGTCCGTTCAACAATCCAAGCCAAAGCAGAAGAAAGTCAAAGTTAAAAAACAGGATGATGCCGGCTATGGATCCGGGGAATTTTCCTTGGACTGGGATGTAGACAGCTACAAGACGGAATACGAAAGTGATGAGCACTGGGATCTGCGACGCAGCTTCATGCTGGCCCACAAGGATCGTTTTGAGGAGGACC
HD3A1001	I14	HD3100151	probe	FBgn0260639	gamma-Tubulin at 23C	gammaTub23C	206	TCCAAGTCGGAGGATAGTCG	TCGTAAAAGACGAAACAGCG	TCCAAGTCGGAGGATAGTCGATCTGTGACCAGCGCCGGTTCCTAGTTCGCTTGTGCCAGAAGAAATGCGTGCCATGCATCTTAACCAATGTATTTTAAAATGTAATATTCTCCAATGACGATGGGATTCGAAATCCTTAAGTAGTAGTGATAAGACGATTGTTGGTATGACTCGCATGTATGTAAACGCTGTTTCGTCTTTTACGA
HD3A1001	I15	HD3100056	probe	FBgn0034982		CG4065	211	GAGCTCATACGCAAGTGCAA	CCCGATCCAAAGTGTTCCT	GAGCTCATACGCAAGTGCAAAAAGCTGACTTCCACGGAGGACTGGATGGCCGTGGTTCACCGGCTGCGTTTCATGCGCCATCTTTTCCAGGTGATCTACCACGTGGAGCAAATGGCCAGCAATGATACCGTCGATGACAAGGTAGACATATACAAAATCCTGCTTGTGGCCTCCGAGATGCTTCCAGGAATAAGGAACACTTTGGATCGGG
HD3A1001	I16	HD3100152	probe	FBgn0031655	Marcal1	Marcal1	205	GCCATTAGCGACTTCCTCAG	GATTCCAGTCCAGTTCAGCG	GCCATTAGCGACTTCCTCAGTGGATTGAAAGTACACTACATACGTATTGATGGACAAACGCGTAGCGATCACAGGTCGGATTCTGTGGACACGTTCCAAAAGAAGAGCAGTTGTAAGGTGGCCCTGCTCTCCCTAAAAGCCTGCAATTCAGGAATAACGCTAACTGCAGCTGAGATCATAGTGTTCGCTGAACTGGACTGGAATC
HD3A1001	I17	HD3100057	probe	FBgn0014189	Helicase at 25E	Hel25E	207	TCGGAACAAGACTATGCACTTC	GCCCCAGAAATTTTCACAAA	TCGGAACAAGACTATGCACTTCGAATAGATACAAACCTAAAACCTTTTTTAAAACTCTACTTTATAACTAAATAAAAACTATTCAGACAATGTGTTGACAAACAAAAACGGAATTATAAGTAATGTATTTATTTTGGGAATGGATTCTAAAACCCACTTGTTTCACATTTCCGTTTAAACTATTTTATTTGTGAAAATTTCTGGGGC
HD3A1001	I18	HD3100153	probe	FBgn0036515		CG12304	208	GTCATCAATGGACATCCCAA	TCTTCCAGATGAGCGTCACA	GTCATCAATGGACATCCCAACTTCATACCCTATGCCTTGTTGGCCCTGAAAAATGCCTGGCGCAATCTGTACACTATTGATGTCAAGACCTTTACGCACTCTACGATGGCCGACATTGGACCAGCAGCACGGGAATTCGAGGCCAACTTGGCGAAGGTTCCAGTAAACCCTGCTTTGCCCAAGATTAGTGTGACGCTCATCTGGAAGA
HD3A1001	I19	HD3100058	probe	FBgn0041627	Ku80	Ku80	201	CGTGTGCGATAGGAAGGACT	GCCTGTAGACCATTTAGCCA	CGTGTGCGATAGGAAGGACTACGTGTCCTTCGTCCTCGTGGGTTGCGACACCGATGAAATAAAAACTGAGGATGCTTCCCACCCAAATGTGCTGCCCTTTGGTGAACCAAGACTTTGCAGCTGGCAGCTCTTGCTGGAATTCTTCCAGTTTGTGAATAAGACAGCCTGCGAGGATGGAGAATGGCTAAATGGTCTACAGGC
HD3A1001	I20	HD3100154	probe	FBgn0003475	spire	spir	82	CCACCAGCATCATCCACAT	CATGTAGCCACCGAATGGAT	CCACCAGCATCATCCACATTTCGCCGAGATGCACCGCTGCTCGCAGCCCAAGATGCCGCCGTATCCATTCGGTGGCTACATG
HD3A1001	I21	HD3100059	probe	FBgn0026196	nop5	nop5	204	AAGGACGAAGAGGTGGAGG	CGGAAACTTTAATCGTTTTGGT	AAGGACGAAGAGGTGGAGGCCGTTGAGGAGGCGGCAGCACCAGAGCCCGAGGATCAGCCAACACCAGCAAAGAAAAAGAAAAAGTCAAAGCACCAGGAGTAATTTCCCACCTTGACTAGTTAGTAGGCCTTAAGTTTTAGCATCATAGGTTACCTTACTGTAAAGTATAGGATTTTATAATTACCAAAACGATTAAAGTTTCCG
HD3A1001	I22	HD3100155	probe	FBgn0000996	double parked	dup	210	GAAAAATCGTGGCCAGTTGTA	GATGGCTGGGCCATAGTAAG	GAAAAATCGTGGCCAGTTGTAATTCGAGCAGTGCGCTGGCACGACGTGGTGATAAAAAAGGAAAACTAATAGAATTATACTGACTAGTGATAATTAACCGGACGTGCCCATCTGTTAATTCAGCCAAGTGGTATCTTTACAACCGTTTAGCCAACAACCAAATTGCTATCAGAAATATATATTATACACACTTACTATGGCCCAGCCATC
HD3A1001	I23	HD3100060	probe	FBgn0032295		CG12299	202	AAAACAAGCGAGCACCGA	TTGGGTGAGATTAGATGCGA	AAAACAAGCGAGCACCGAAAACAGGAAGCAAGTTATTCGCATTTCGCTGGCGGCGCATAAAATGGAACGCAGTGGACGAATGTGGACGAGAGCCCTGAGAGAAACACAAAAGCACGGAACCTGAGCAACAGCACACACCAGTGATATAATAGTAGTCTACGGAACCCCTGATCCACGGCACTTCGCATCTAATCTCACCCAA
HD3A1001	I24	HD3100156	probe	FBgn0032863	Cell division cycle 23 ortholog	Cdc23	202	ACCTTGATGGGACACGAGTT	GCATTCGAGAGTCGTAGGGA	ACCTTGATGGGACACGAGTTCATGGAGCTGAAAAACACAAATGCAGCCATACAGAGCTACCGAAAGGCAGTGGAGGTCAACAAGCGGGACTATCGCGCCTGGTATGGACTGGGCCAGGCCTACGAGATCATTAAAATGCACTACTACAGCCTGTACTACTTTAAAATCGCCCACCAACTGCGTCCCTACGACTCTCGAATGC
HD3A1001	J01	HD3100241	probe	FBgn0032030		Wdr82	219	CATCTCTCTGGACGACCCAT	GATGACCGATCCATTCGTG	CATCTCTCTGGACGACCCATTGCTGCCTACGATCCCGAGGGCTTGATCTTCGCCGCTGGCGTTAACTCGGAAAGCATTAAATTGTACGACCTTCGCTCTTTCGACAAAGGCCCCTTCGTCACATTTAAACTTAATCAGGAGAAGGAATGCGACTGGACTGGCCTTAAGTTCTCCCGTGACGGCAAAACAATTCTGATCAGCACGAATGGATCGGTCATC
HD3A1001	J02	HD3100337	empty
HD3A1001	J03	HD3100242	probe	FBgn0011802	Gemin3	Gem3	221	GGAAAACGGCGTGTGATACT	TGGAGCCGTTTCAAAAATCT	GGAAAACGGCGTGTGATACTATACAAGAAAGTATTTCCTAAACTAAAGGCGAATGTTAAACGCAAGCTTAAAAAACGGATGAGCTCGTCATGCAGATCCAAAAAAGCACACCATTTGCGAAAACGTCATGTATACAAAAATATATCACTTTTGCCACACATGAATTTGTGTCATCTGCTTCAAAAATTTACAAATCAAGAGAGATTTTTGAAACGGCTCCA
HD3A1001	J04	HD3100338	probe	FBgn0026181	Rho-kinase	rok	222	ACGGCATCGAGGACATTAAG	CCGTATACGTAAAGCCGATGA	ACGGCATCGAGGACATTAAGGCGCATCCGTTTTTCCGAAATGATACCTGGTCGTTCGACAACATTCGCGAGAGTGTGCCGCCTGTGGTGCCCGAACTCTCCTCCGACGATGATACGCGAAATTTCGAGGACATTGAGCGCGATGAGAAGCCGGAGGAAGTGTTTCCCGTACCCAAGGGCTTCGATGGCAATCACTTGCCCTTCATCGGCTTTACGTATACGG
HD3A1001	J05	HD3100243	probe	FBgn0038197	forkhead box, sub-group O	foxo	204	CAGGCTATACAGAATGCGAATG	CCATCCGGCACTGCTATT	CAGGCTATACAGAATGCGAATGCAGCCAAGAAGAACTCATCGCGTCGCAATGCATGGGGAAATCTATCCTATGCGGATCTCATCACGCATGCCATTGGATCGGCCACCGACAAACGATTGACACTGAGTCAGATTTACGAGTGGATGGTCCAGAATGTGCCATATTTCAAGGACAAGGGCGATTCGAATAGCAGTGCCGGATGG
HD3A1001	J06	HD3100339	probe	FBgn0086359	Invadolysin	Invadolysin	217	CGGTTTTCGCGAGTTAATTG	TACTTCGGGGTGGAATATCG	CGGTTTTCGCGAGTTAATTGACAAAGCAAACGGCGGAAAAGCAGCAAACATAAGCAAACCAAAGAGGAAAATAAACAAAGAATTTTAAGTGCAGATATGGGTGTTCGAAGTCAAGTGATAATTAAACAAAAATCACACTAATCCTGACAATGAAAAGGATCACCGCTACAATGCTGAGTACTCTATAATATCCACGGCGATATTCCACCCCGAAGTA
HD3A1001	J07	HD3100244	probe	FBgn0260985	Replication factor C subunit 4	RfC4	203	ATTGCGCTGCTAACGACATA	CTGCAGCAGCGAGTTGATAC	ATTGCGCTGCTAACGACATACACAAGGCCTACAAAATCCTGGCCAAGCTGTGGAAGCTGGGATACTCGCCGGAGGACATCATTGCGAACATATTCCGTGTCTGCAAGCGCATCAACATCGATGAGCATTTGAAGCTGGACTTTATCCGTGAGATCGGAATCACCCACATGAAGATTATCGATGGTATCAACTCGCTGCTGCAG
HD3A1001	J08	HD3100340	probe	FBgn0026056	Ral interacting protein	Rlip	204	CTGGAACTCCAGCCGTATCT	GTTCGTTCTGCCATTCCATT	CTGGAACTCCAGCCGTATCTACGAACAACAGTATTTCCCAGGAAGAGCCAAAAACCGATACACTAACTCCGAAAGATGCTCCTAACGATTTTACTATTGATCCCAGCACTGGCTTTATTTTGCTCCCCAAATCAAATCCGCACCGCGAAAATTTGCTGCGGCTCCAAATTGAATATGACGAGCTAATGGAATGGCAGAACGAAC
HD3A1001	J09	HD3100245	probe	FBgn0027490	D12	D12	212	CCTTTCCTGGAGAGTCATGC	TTGAGTCCTAGGAGGCGATG	CCTTTCCTGGAGAGTCATGCAAACCGCGCACCATTTCAATCACTCAAAATAAGGAGGAACTTGATGACAATCTGTTTGCTGGTATCAACAAAATTGAACTCAGCGACGACATTGAGAAAATTGAACCAACTGTGTTGGTTTCAGAGCCCCTGAAGTTAAACTACAGTCCAAGAAAGCAGCCACCCACTCCGTCATCGCCTCCTAGGACTCAA
HD3A1001	J10	HD3100341	probe	FBgn0030120		CG17440	84	GCATAAACCGGAAAATCCAT	GAAAAATATTTCTTGGACATCAGTT	GCATAAACCGGAAAATCCATAGATTTGTAATCCCCTAATCATAGCAAGAAATAACAATAAACTGATGTCCAAGAAATATTTTTC
HD3A1001	J11	HD3100246	control_rh6	FBgn0019940	Rhodopsin 6	Rh6	167	CCTGCGGCACTGACTACTTT	TGAAAGGCCAAAATCAATCC	CCTGCGGCACTGACTACTTTGCCAAGGACTGGTGGAACAGGTCCTACATCATCGTCTACTCCCTGTGGGTCTATCTCACGCCGCTGCTGACCATCATCTTCTAATATGACATTCGTTACTAATTATCCAAGGATTCTGTTTGATTAAGGATTGATTTTGGCCTTTCA
HD3A1001	J12	HD3100342	control_rh6	FBgn0019940	Rhodopsin 6	Rh6	167	CCTGCGGCACTGACTACTTT	TGAAAGGCCAAAATCAATCC	CCTGCGGCACTGACTACTTTGCCAAGGACTGGTGGAACAGGTCCTACATCATCGTCTACTCCCTGTGGGTCTATCTCACGCCGCTGCTGACCATCATCTTCTAATATGACATTCGTTACTAATTATCCAAGGATTCTGTTTGATTAAGGATTGATTTTGGCCTTTCA
HD3A1001	J13	HD3100247	probe	FBgn0001565	Helicase	Hlc	203	AACAAGGGCACCTACGACAT	CCAGCCCGATGGATATAAGA	AACAAGGGCACCTACGACATAATCATTGCCTCCGACGAACATCATATGGAAAAGCCAGGAGGCAAATCAGCGACTAACCGAAAATCTCCTCGAAGCGGCGACATGGAGTCGAGTGCTTCCCGCGGCATTGACTTTCAGTGCGTGAACAACGTAATCAACTTCGACTTCCCCAGGGATGTCACGTCTTATATCCATCGGGCTGG
HD3A1001	J14	HD3100343	probe	FBgn0011020	Spindle assembly abnormal 4 ortholog (C. elegans)	Sas-4	201	GCAGTGACTTTAAGCGGGAG	GGTAGGAGGTGTGCCAAGTG	GCAGTGACTTTAAGCGGGAGATTACGAATGCGGATGGGAGCAAGGACATTTGGTACCCAAACGGCAATCTAAAAAAGATAAGCGCCGATGGCATGAACTTGCGCATGCTCTATTTCAACAAGGATATCAAGGAAACTAACATCAGGGAAGGCACAGTGAAGTATTACTACGCTGAGACCAACACTTGGCACACCTCCTACC
HD3A1001	J15	HD3100248	probe	FBgn0261397	dilute class unconventional myosin	didum	225	GCCTCAACAACGGTAGCAAG	CGATACACGGTTGATTGTCG	GCCTCAACAACGGTAGCAAGCAGTGCAGCTTCATTGGCGTCCTCGATATCTACGGCTTCGAAACGTTCGAGGTGAACTCCTTTGAACAATTTTGCATAAACTATGCGAACGAAAAGCTTCAGCAGCAGTTCAACCAGCATGTCTTCAAGCTGGAGCAGGAGGAGTATCTTAAGGAAGGAATCACCTGGACGATGATTGACTTTTACGACAATCAACCGTGTATCG
HD3A1001	J16	HD3100344	probe	FBgn0037338	Snm1	Snm1	202	CCCTGGGCAAAAACTCTAAA	AGGGGATGGCAGAACTTTTT	CCCTGGGCAAAAACTCTAAAAAAGGAACTGTACGCAAACAAAGAAAACCAAAGCCTTGTCCGCCCTATAAAGTAGTGGAGGGTACATCCTTCTGCGTCGACGGCTTTCAGTTTGGGGAAATAGAGGGAGTCACACATTACTTTCTCACGCACTTTCATGCGGATCACTACATCGGCCTGACTAAAAAGTTCTGCCATCCCCT
HD3A1001	J17	HD3100249	probe	FBgn0015754	Lissencephaly-1	Lis-1	201	CGCTTTCTGTGTCAGCGTAA	TGGTTTATAAAGGAGGGCGG	CGCTTTCTGTGTCAGCGTAAAATGAACATATTGTATTTTAAAACTGAATGAAACTGGCGAAAACGAATTATTTATTTAATTGTACGACCTTCTAACTAAACTAACTACCTACCTACTATACAAAGTACATAAACAAAATGCCCAAAAAATACATACATACGATTATCGTTTAAAGTTAATGCCGCCCTCCTTTATAAACCA
HD3A1001	J18	HD3100345	probe	FBgn0038454		CG10324	214	GCCAAATACGAAGAATTCAAAAA	AAGACCTTTTATCTTCTTCCTTGC	GCCAAATACGAAGAATTCAAAAAAAATGAAAACGAGCATGGCCAGATTATTGTGAAGCAGGAAAATCCGTCAGGAAGAAGGGACAGAGACCGCAGGGAAGAAATTAGATCAGACCGGGATGAAGCTCAAAATCAAAAGAGTTCGAAGCCAGGGGACCAGAGATCTAGTAAAGAAGACTATCGCATGAAATGCAAGGAAGAAGATAAAAGGTCTT
HD3A1001	J19	HD3100250	probe	FBgn0022724	TBP-associated factor 8	Taf8	224	GAGATGGATGGCGACAAATC	ATCTCTAGAGTGGAGGGCGTT	GAGATGGATGGCGACAAATCCAAAGAGGAGAAGCCCGAGCTGGATATCAAGCCCAATTCCAACACAAACAAGGCCATTTTGGAGAACCCCAACATCGATAATCCCTATTTGCGGGCGGCTACTCTGCCCAAGCGATCCAAAAATTGCCCCACACCCGGAACCATGCCCAGCAGGAGTCTGGCCACCACGGCGCCAACGATACGAACGCCCTCCACTCTAGAGAT
HD3A1001	J20	HD3100346	probe	FBgn0002774	maleless	mle	205	TAAATACGCATGTGCGATCC	ACACAGGTTCACCAAAAGCC	TAAATACGCATGTGCGATCCGAATAGATTCACGAGTTAACGTATGTAAATAGTAACCAAATATGATAGTTCCGCTGACATTCCCTAACCTGTTGCATACATACATATATTGCTGGAATTTCGTTTGTGAAGGCGTGGAAATCGTTTATTGTCACAAAATGAGATCAAAAACATTCATTCTATAAAGGCTTTTGGTGAACCTGTGT
HD3A1001	J21	HD3100251	probe	FBgn0030434	BRMS1 ortholog	Brms1	203	TCCACAGTTTCCACACTCCC	ATTCGAGTGCTCCGATTCTC	TCCACAGTTTCCACACTCCCCGATTGTCGAAAGCAAACAAAAAAAGATATCGCGCTTATACCGGCGGCCACCTGCAGTCCATTGCCGAATCGGAATACGCCGAGAACAAGGAGAACCGCAAAATCCACTCTGAAATGCCCGTGAAGAATGGCGAATCCGATGGCGAAGGCGACGTTTCTGGCGGAGAATCGGAGCACTCGAAT
HD3A1001	J22	HD3100347	probe	FBgn0038768		CG4936	217	GGGTAACAGTGATTCGGCTG	GGAGTGGACCTTGATGTGCT	GGGTAACAGTGATTCGGCTGGCAGCAAAATGAGCATCAAATCCGAGAAGGACATCTCGATTGGCGAGGTGCTGGCGCGCAAGCATTCCGGCATTAAAACCAAAGGCGGCCACAAGATCCTTCTTGGCGACAAGAAGGAGTTCAAGTACATCTGCGATGTCTGCGGCAACATGTATCCCTCCCAGAGTCGCCTTACCGAGCACATCAAGGTCCACTCC
HD3A1001	J23	HD3100252	probe	FBgn0264694	merry-go-round	mgr	201	AACATCGGTAGCAGCCACTC	CATGCAGTTAAATGCCCGTA	AACATCGGTAGCAGCCACTCGCATCTTATTTATTTCGACAGTACACCGCAAGGGCTCGGCAGGCGATTCCACCTGGCTTATTCTTGTTCTCCACTGATAGCAATAAAACCGCCACACAAACGCATCAAGCTGACTCCAAACGAGATGCCTATTCCGGAGGAATGTAATATTTTAATTTGGCTACGGGCATTTAACTGCATG
HD3A1001	J24	HD3100348	probe	FBgn0031401	papi	papi	201	CCTCGAAAGGCAGACTTGAA	GCTTCCTCCTCGTCGTTTC	CCTCGAAAGGCAGACTTGAAAAGGCTGCCCCAAACACCCAGCTCTACGCAAATCCACCCACAACAAGTTAATCAACATGTTGCGCAACACGCCTTTCGGTGCCACGCCCACCTACAAACTACTTCTGGGCTTCGGACTATGCTCCCTTGGGGGCGCCATGCTATATGCCTATTTCAAGACTCGAAACGACGAGGAGGAAGC
HD3A1001	K01	HD3100061	probe	FBgn0000723	Fps oncogene analog	Fps85D	202	GGGGATGTCTACAAGGCCA	GCACCAATTCCATGACAATC	GGGGATGTCTACAAGGCCAAACTGAAGTCCACCAAACTGGATGTGGCTGTCAAAACCTGTCGAATGACCCTGCCCGACGAACAGAAGCGTAAATTCCTACAGGAAGGGCGCATCCTCAAGCAATACGATCATCCAAATATCGTAAAATTGATTGGCATTTGTGTGCAGAAGCAGCCCATCATGATTGTCATGGAATTGGTGC
HD3A1001	K02	HD3100157	empty
HD3A1001	K03	HD3100062	probe	FBgn0030555	F box and leucine-rich-repeat gene 4	Fbxl4	201	GATTACGGCGGTTGGTTC	AAAGGTCTCCGGATAATCGC	GATTACGGCGGTTGGTTCGGTTGCGACAGCAAAATGCAGACGACGCAATCCGATCAGGGCTACTATCTCGAGCAATATGTGCTGGGCGTGCTCGATTTCAGTTCACAGTATGGCATCGATTACAGCATCTCGTATACGGCGGCCAATGTGATTGGCAGGCCAACGAAATTTCCCGCCTATGGCGATTATCCGGAGACCTTT
HD3A1001	K04	HD3100158	probe	FBgn0037926	Elongator complex protein 1	Elp1	205	CTTCAAGCCGCAGCTGATTA	TTCGTTTTGTTTAATCTCGATACA	CTTCAAGCCGCAGCTGATTATGATGGACTGGCAACACGAGATCCTCCAGTGAATCTTCGACGGGATCATTGGATTTGCGTGCTGCACTCATCCTCCCACCAATCCGTAGTCGTCTCAGTCTCCCACTTTTGTTAACTTTCACTGCTTTAAAAATAAATGTAGCATTGAAATGCTAATTGAATGTATCGAGATTAAACAAAACGAA
HD3A1001	K05	HD3100063	probe	FBgn0025630		CG4061	223	GTTCCACAGTGGCAGGTGTT	GCGTCCATTTTCCCAATTTA	GTTCCACAGTGGCAGGTGTTTGTTTCCAAGCAAACGCGAGCGTCGGGCACACTGCCCGGATCACAGTGTGCCGTCCCAATCGAGTGAAATGGAGCTGTTATTCTTAGCCCCTGTCATTGTGATATTTGATTGCTCCGATTGTTCTGACACACACTTGGCTGACAACCTGAGAGGAAACCAGACTGAAAATCCCTGAACATAAATAAATTGGGAAAATGGACGC
HD3A1001	K06	HD3100159	probe	FBgn0005617	male-specific lethal 1	msl-1	218	CCCGTCTGATATTCGGAAAC	GCGTAACCTGTGACGAATGA	CCCGTCTGATATTCGGAAACAAAAGAACGTTGATCCAGTTTCGACGCCCGAGACGAAAACCATTAAAAGTAAAAGTATGTTGGTCAATGATAAAAAGACCACGTCGGAAACGTCTCAGAGCCCAGATCAAGAAATAGATGTGGAAACAGTTAGAAGAAAACTGGCGGAACATTTAAAAAAGGAGCTCCTAAGCCAGAGTCATTCGTCACAGGTTACGC
HD3A1001	K07	HD3100064	probe	FBgn0002914	Myb oncogene-like	Myb	206	CGCCATTAAAAACCATTGGA	CGGCGTTTTCGGATTTATTA	CGCCATTAAAAACCATTGGAATTCAACAATGCGTCGCAAATATGACGTCGAACGCAGATCGGTTAATGCATCTGGTAGCGATTTGAAGAGTTCGCGAACCCATCTCATCACGCTGATCAAGTCCGGTGGCATCAGCAAGTGTATGAATAATATGCAACATAACAAGGAATCTGGTGGTGAGGCAGTTAATAAATCCGAAAACGCCG
HD3A1001	K08	HD3100160	probe	FBgn0030990		CG7556	221	CAACTGGAAGTCTGCCCTCT	TCTCGCTAAGGATCACGTCC	CAACTGGAAGTCTGCCCTCTACTATTACCGACGTATGCGCAAGATCGGGCTCTATGAGGGCGCCTTTATCCTCTTCCTGATAACCACCGTGGGCCAGTATCTATTCGCCTGGGCGGCCTACCTCGAGAAGAAGTACACCGCCGAACAGGTCTTTGGCACCAAGCTGAAGAAGCTGCAGAAGAAGAACAAGAACATCGACATGGACGTGATCCTTAGCGAGA
HD3A1001	K09	HD3100065	probe	FBgn0260444		Not10	209	GCACACTAAACGCCTTCGAT	ACCCATTTTGAGGTCCATGA	GCACACTAAACGCCTTCGATTTTGAGACGCGTGACTGGCAACTGAAGTCGGTGGACGCCGCTCAGAACGTTGTGCGGTATAATCTGGCCGTTGCCATGGCTCTACAGAACGACCTGCCTCAAGCTAAAGCACTCCTGGCCAATTTAACTCATTCGCTGGTTGCCAACAAGGCGCTTGCTTTGCGACGCTTCATGGACCTCAAAATGGGT
HD3A1001	K10	HD3100161	probe	FBgn0003483	spindle E	spn-E	210	CCTTTGCAAGGATCGTAGATA	AAGTTGCGCCATTTGTGC	CCTTTGCAAGGATCGTAGATATATCGAAAGAAATATGAGCAATGCGGATTTTGAATGGGAAACCAATCCCGAACTACCACTGCCGAATGAACCTTTTGGCAAGAGGGCCATATTTCCGATGCACTCACTTACTGAGCTCCAAGAGGAAGACACGGGTCGCTTGGTGCAACTGAGAGAGAACTGCAGCATGTTGCACAAATGGCGCAACTT
HD3A1001	K11	HD3100066	probe	FBgn0001986	lethal (2) 35Df	l(2)35Df	204	GACAAGGGCATCGTCATTCT	CAGTGCAGCTTGATTTTGGA	GACAAGGGCATCGTCATTCTCATGATCGATGAAAAAGTTTCGCCGGCTGTTGGTCGTGACATTGTTCAGGGCAAGGCAGATCCCATCAATTCGGCCTTCCATCTTACATACAATATGGTGCTGAATCTGCTTCGTGTGGAGGAAATCAATCCGGAATACATGCTGGAACGCAGTTTCTATCAGTTCCAAAATCAAGCTGCACTG
HD3A1001	K12	HD3100162	probe	FBgn0003138	Protein tyrosine phosphatase 61F	Ptp61F	212	GGCGGTATACTTTCGCTCAA	TCGTCATCCAGCAAGTAATCC	GGCGGTATACTTTCGCTCAATATGCGCGCGGCCCAGGCTAATGGAGCTGAAAGTATCGGCAAAGAGCTGAGCAAGGACGCCCTGAACAACTTCATTAATCAGCACGACATGATCCACGATGCCGAGGTGGCCGACAGTCGTCCCTTGCCGCCATTACCCGTAAGGGCTTTCAACGATTCGGACAGCGATGAGGATTACTTGCTGGATGACGA
HD3A1001	K13	HD3100067	probe	FBgn0261823	Additional sex combs	Asx	206	AGGAGTTACCCGTGGAGTTG	AACATCGTGGCACACATCAT	AGGAGTTACCCGTGGAGTTGAACTCCAATGAAATGTACCAGCATGTGCAGCACGATTGGAACTTTGGCGACATTAAGTTAAGCAGTTCGCAGTCAAGCGGAGATCAGCAGCGTAATCTAAGCCATGAAGCAATCGATCTGATGGATGTAGTGCAAGATGCCGACGTCATCGACGACATTATGCACAATGATGTGTGCCACGATGTT
HD3A1001	K14	HD3100163	probe	FBgn0003268	rough deal	rod	222	ACCTGGAGTTTTGCCAACAG	TATCCCTCTTCACCTCGAAGC	ACCTGGAGTTTTGCCAACAGGATCATAGAATAAAGGGCAAGTTCAATGCCGACATGGACAACATAGAGGACCTGCTTAAGGAGTTTCACAATAAGCAACTTGACGTTCAGCTTTTGGAACGCATGAGCAAGGACTTTGGGTTCGACTACCAAAAGATTCTTATTACCCAGATACTAAGCATATTGAGCGCCCAGGAGTTGCGCTTCGAGGTGAAGAGGGATA
HD3A1001	K15	HD3100068	probe	FBgn0024188	separation anxiety	san	223	TTTCCCGGTCTCCTACAATG	GGCGAAGTTCATAATGTGCTC	TTTCCCGGTCTCCTACAATGACAAGTTTTACGTGGACGTCCTGGAGGCCGGCGAACTGGCCAAATTGGCCTACTACAACGACATTGTAGTGGGCGCCGTCTGTTGTCGCATCGACAACACTGAGAACCAGCGGCGCCTGTATATCATGACCCTAGGATGCCTCTCCCCGTACCGGCGCCTGGGCATCGGCACAGTTATGTTCGAGCACATTATGAACTTCGCC
HD3A1001	K16	HD3100164	probe	FBgn0010315	Cyclin D	CycD	201	GCTCAGGTGCGAGATTGTATG	GCACTCGGCAGGAGCTTT	GCTCAGGTGCGAGATTGTATGCTGCACATGGAGGACATCTTTAAGGAGCACAGTCGGAATCTAGAGCCATTTCTAGTGAATATTGACCCAAAAGAAATGTCAACATTATACTACAAGAGGCGCTTCCAAATACATCAATCGCAGCATCTCTCGCAAATCTCAATTAGACCCTTGCCGCTACCGAAAGCTCCTGCCGAGTGC
HD3A1001	K17	HD3100069	probe	FBgn0262699	retina aberrant in pattern	rap	203	GGATCATACAGCGGGATACG	CTTTACAGCCGCCATATGCT	GGATCATACAGCGGGATACGAGAACGCCGCAACTGCAATCGGAGCGCAGATTGGCCGGACATCGGCAGGAGGTGTGCGGACTGAAATGGTCACCGGATAATCAATACTTGGCCAGTGGCGGCAACGATAATCGGTTGTATGTGTGGAATCAGCATTCCGTGAATCCCGTACAATCATACACGGAGCATATGGCGGCTGTAAAG
HD3A1001	K18	HD3100165	probe	FBgn0015299	Single stranded-binding protein c31A	Ssb-c31a	204	AGGTGCGAATCAACGAGTTC	TGGCTACGACTTAGTTTGGCA	AGGTGCGAATCAACGAGTTCCGCGGTCGCAAATCGGTGGACATTCGAGAGTTCTACGATAAGGGCGGCCAAATTCTTCCCGGCAAGAAGGGCATCTCCCTATCTTTAATTCAATGGAAGAAACTCCTTGAAGTGGCCGAAGAAGTCACCCGCGCGATCGAGAATTAATTGAAGTTCATCCACATGCCAAACTAAGTCGTAGCCA
HD3A1001	K19	HD3100070	probe	FBgn0262519		Mi-2	87	GATATCCGTTTCGCGATCAT	GGCCAGGAACTTGTTTTTGA	GATATCCGTTTCGCGATCATAAACGAACCTTTCAAGATGGACGTTGGTAAGGGCAACTTTCTGGAAATCAAAAACAAGTTCCTGGCC
HD3A1001	K20	HD3100166	probe	FBgn0030240		CG2202	225	CAGTGTAGGCGGTTGGAATC	TGGGGAGCTATTTGCACTTT	CAGTGTAGGCGGTTGGAATCTTTTTATAAAGCTTGCATCAGTGCGATTGTATATTAGTATATTAAAATTAAATTGCACATAGCTCCCCCTCCCTCAAACAATTGACAAATTGAATTGTATATTAGTATATTAAAATTGAAGTCCAAATAGCACCCCCTCCCTCTAACAATTGACAAATTTAGTTGTATATTAGTATATTAAAATTAAAGTGCAAATAGCTCCCCA
HD3A1001	K21	HD3100071	probe	FBgn0039218	Rpb10	Rpb10	83	GTTGTGATTGCACATTTTTCG	AGGTGAAACAACGGATTGGA	GTTGTGATTGCACATTTTTCGTGATTTAACTAAGAATTAGAGCCTGATCTACAAAATGATTATTCCAATCCGTTGTTTCACCT
HD3A1001	K22	HD3100167	probe	FBgn0029885		CG3224	213	AACCAAAACACGTGCCAAA	CTGATTGATCAGTTCACCGC	AACCAAAACACGTGCCAAAACAAACGATTAAATTTTCCGTAAAAGTTGTAAATATAAAAAAAAGTCAGCAAGATGGGAATGGTATCGAAACGCAAGAAGATGCACTATGGCGATACCCATCTGCAGAGGAGATGGCGTGTGCGGAATCGACGTCGTGATCTCGACCAGATCGACGACGATCTGCAGACCCGGAGCGGTGAACTGATCAATCAG
HD3A1001	K23	HD3100072	probe	FBgn0029798		CG4078	204	CTGTCCCTACTTCGCGTCTC	ATGGCCACATCAGAGGACTT	CTGTCCCTACTTCGCGTCTCGGGAGTTGGTTCCCCAGGCGGATATCACCTTCATGCCCTACAATTATCTACTCGATCCCAAGGCTCGCAAGGCCAACAAAATCGAACTGGGCAACACTATTGTGATCCTGGATGAGGCCCACAACATCGAGAAGATCTGCGAGGAGTCCGCTTCGGTGCAGATTAAGTCCTCTGATGTGGCCAT
HD3A1001	K24	HD3100168	probe	FBgn0031606		CG15439	208	GCCCACGCCCAATACTATC	CAAATGGGTGGAAGACTCGT	GCCCACGCCCAATACTATCGTGATTAACCTATCTGGCTGTGAGGACTCGATTGACGACTCCAGTGGAAAATTATCGCGCAAGGGTAAGCGCAAGGACAAGCACAAAAACAAACACAACCTGTCGTCGGATACAGAGAAATCGATCGGCAAGGAGCATAAACGGAAGCGAAAAAAGCGCGCCCACCTTGACGAGTCTTCCACCCATTTG
HD3A1001	L01	HD3100253	probe	FBgn0027581		CG6191	202	CCAACCATCTTCCGTCATCT	CTCTTCGCGATTCTTTACGA	CCAACCATCTTCCGTCATCTAAAGTGCTAAAAATTCGTCACCATGTCGCGTTCAAGTAGTTTGTTTTTTAATTCGGCTGCCAAGTTAGAGACTAAAAAACTTAATTGATTCGATCAAGAAAAGTGAGCAACCAGCAGTGAAAATACACAACAGCAGCATAATCACTTTCGAAACCAGTTTTTTCGTAAAGAATCGCGAAGAG
HD3A1001	L02	HD3100349	empty
HD3A1001	L03	HD3100254	probe	FBgn0043001	Chromatin accessibility complex 16kD protein	Chrac-16	219	CACTTGTGAGCCCAGCTCTA	GTGCACTTGGTCATCAGGAA	CACTTGTGAGCCCAGCTCTAAAACCAAAAAAATTCCCAAGCCATAGTTTGCTTGGGAATTAAGTAAACAAATGGGCGAACCAAGGAGCCAACCACCCGTGGAGCGTCCACCGACCGCGGAAACCTTTCTGCCCCTCAGCCGCGTGCGAACGATCATGAAGAGCTCCATGGACACGGGCTTGATCACCAACGAGGTGCTCTTCCTGATGACCAAGTGCAC
HD3A1001	L04	HD3100350	probe	FBgn0264959	Src oncogene at 42A	Src42A	225	CGTGGGCAAGCATTTAATTT	ATCAATGGAAGCCAAATTGC	CGTGGGCAAGCATTTAATTTCGTTAGTGCCCAGTAAAACAGAGTTGAGCGAAAAGGCGATAGCAACTTGCACAAATTGTAAGCAGTGCAGAGAGTCAGTGAAGAGGGGATCGAGTGAGAGCGGCGTTTAGTGCCAACACCCAAGCGCTGATCTCGCAGCTACAAACAATAAACAAACAGTGAAAGTAACAGTAAACGCAAGCGCTGCAATTTGGCTTCCATTGAT
HD3A1001	L05	HD3100255	probe	FBgn0001324	kohtalo	kto	208	ACGCCTGGTTTAAGGACCTC	GGGTCGTAAATGGATCGCT	ACGCCTGGTTTAAGGACCTCGCCGGTAACAAACCCCTACTTAGCCTAGCCAAACGGGCTCCATCGTTCAACAAGAAGGAGGAGATCTTCATTACTCTGTGCGAGAACCAGGTGAACATGCAACGCGCCACCTGGTTCATCAAGCTGAGCGCCGCCTATACGCTTAGCTTCACCGAGTCTAAGAACAAAAAGCGATCCATTTACGACCC
HD3A1001	L06	HD3100351	probe	FBgn0026431	Grip75	Grip75	214	TCAAGAGCAGGAGTGATTTCG	TCATCAGACGGATCTTTCGTT	TCAAGAGCAGGAGTGATTTCGAAGTTATACAAAGGGCTCACACTGTATTTCTGGCAAATGTTCTTTCGCATTGCTTCCTGCTTAACGAATCAGAGACCCAATTGAATGTCACCGGGAGCCAAAACCGAAATCCCATTTATGGAACCCTTCTTAAACTCTTTGGCATATGTGAGAAGTTTGCGCATATGACCCAAACGAAAGATCCGTCTGATGA
HD3A1001	L07	HD3100256	probe	FBgn0036374		Spt20	201	TTGGGACGACTGAGAGATGA	TTGCACAACTATGAGCTGCC	TTGGGACGACTGAGAGATGAAGCTATAGAGCGAACAAGTAGAAGGCTACGCGTTGTGTATTGCTTGATATTATAGTTTATGGTTACCTCCTAACTATCACTACTATCGTACATTGTATACCCATATAACTATATATGTTTTGATGTGTAATCGTAAGTGTAAATTGCATGGGCAACAGCATGGCAGCTCATAGTTGTGCAA
HD3A1001	L08	HD3100352	probe	FBgn0052190	NUCB1	NUCB1	201	CCCAGCAGCAACAGCAATAC	GCTGCTGATAGACTGGCTGC	CCCAGCAGCAACAGCAATACGCGCAACAGCAACAGCAATATGCCCAGCAATACCAACAGCAGCAGTACGGAAACGGACAGCAGCCTGTGCAGCTGCAACCCAACCAGGTTTACCAACACGCTGGACAGATTCCGCAGCAACAACAACCGGTATACCAAAATCAACCTGTGTATCAGCAACAGCAGCCAGTCTATCAGCAGC
HD3A1001	L09	HD3100257	probe	FBgn0263831	XPG-like endonuclease	Gen	203	AATTTGTTGCGAATTTCTCG	TTTAAATGATGCCTTGGATGC	AATTTGTTGCGAATTTCTCGCGGGGTTTTTGTTTAGCTTATTTAAATGGGCGTCAAGGAATTATGGGGTGTTTTAACGCCCCATTGTGAACGTAAACCCATTAATGAACTGCGGGGAAAGAAAGTGGCCATCGACCTGGCCGGCTGGGTGTGCGAATCTCTTAATGTTGTGGACTACTTTGTGCATCCAAGGCATCATTTAAA
HD3A1001	L10	HD3100353	probe	FBgn0035769	CTCF	CTCF	204	ACGAGGCTGAGGTCTACGAA	GCGTGATCAGAAACTTCTTGC	ACGAGGCTGAGGTCTACGAATTTGAGGACAATGCGACGACAGAGGATGAGAATGCCGACAAGAAGGACGTAGACTTTGTGCTAAGCAACAAGGAGGTGAAGCTGAAGACAGCTTCTTCTACCAGCCAGAATTCGAATGCATCGGGACATAAGTACTCATGCCCACACTGCCCGTATACGGCGAGCAAGAAGTTTCTGATCACGC
HD3A1001	L11	HD3100258	probe	FBgn0015546	spellchecker1	spel1	203	CGAAGCCGAAATATCCTCAA	AGAATTTTCGGGGTCCTCAG	CGAAGCCGAAATATCCTCAATGATCGTCATAACATTGTCCAGTGCCTACTCGAATCTCCAGACACAATGGAGACTTTGAGTCTCGATTATCTGAAGCGTATTCCGGATATTCTTATGCTAACTAAGAAGCTAATGCGACGCAAAGCTAATTTGCAAGATTTATTCCGCATTTACCAGGTCATTCTGAGGACCCCGAAAATTCT
HD3A1001	L12	HD3100354	probe	FBgn0037182	ADP-ribosylation factor GTPase activating protein 3	ArfGAP3	202	CAGCGTCATCAGAGAGCAGT	TGGCTCTACCGCTTCAATTT	CAGCGTCATCAGAGAGCAGTCTAGTAATAACGTTTTTATATATTAGCTGTCGCGATTATGCAGAAAGTTTTCAAGGACTCCAAGCCGATAGCCACGTAGTCTTGTTACAGAGGAGCAACCACTTCACATGCCTCATATCGTTCTTGTATACACAAATAGCAGAAACAGAAGAATCTAAAACAAAATTGAAGCGGTAGAGCCA
HD3A1001	L13	HD3100259	probe	FBgn0033890		Ctf4	202	TCCGGATATCACACCCTCTC	ACAAACAGACTATTTCTTTGCCA	TCCGGATATCACACCCTCTCCGCTGGACACCCAGGAAAACATATTCGGCGAATCGGAATCCGAGGTTCCCATGGGTAAAGCCACCGATCACCGGTCCCCTTTGAATTCGGTTAATCCCTTTGCTATGAAGCGCAAACTGGGCGACACTGGAGTCATCTTTGGATCCGAAAAGCTGAAGCTGGCAAAGAAATAGTCTGTTTGT
HD3A1001	L14	HD3100355	probe	FBgn0264922	smt3	smt3	82	CAACAAACCAGGCCCTAAGA	GTTATTTACGCACACAGACGC	CAACAAACCAGGCCCTAAGAATCGATTGAATATGCTTTTAGTACAACTGTAGATTCTAAATGCGTCTGTGTGCGTAAATAAC
HD3A1001	L15	HD3100260	probe	FBgn0011766	E2F transcription factor	E2f	211	TGGGCCCAATAGCAGTTTAT	TGCGGTTCTCCTTCGTTTAT	TGGGCCCAATAGCAGTTTATTCATAGAAGCCAAATCATCCCACAAAACAAACAACCAACCACTTAACAGAGTCAACTACAAGTACATAAATAATTATTTAAACTCTCTCCTAGTAGTTATATATTTAACTAAACGATAGATAAAAGCAACAAACAAATGCAAATCATACAATTGTAAAAAAAAATCAATAAATAAACGAAGGAGAACCGCA
HD3A1001	L16	HD3100356	probe	FBgn0039169	Sp1-like factor for pairing sensitive-silencing	Spps	209	GGCGACAATTCGTCCAACTA	AATCTAGGATGATCCGCAACC	GGCGACAATTCGTCCAACTAGCATTCGGAGTCGCTGTTCATGGAACAGTTCTTGTTTGACCACTTCCCGTAGCACCCACCGCCCCCTGCCGCGCCCCATGGGACCATGGTTTAGCAATATATAAATTGTACATAGCGTAATTATGTAAAAGCGAGCATTTTAAATGTTTACCCTTCTTGTACAGCTCCGGTTGCGGATCATCCTAGATT
HD3A1001	L17	HD3100261	probe	FBgn0011818	out at first	oaf	209	TGGTTCGTTGTGCTTTCTTG	GATTTTTACTGACGACGCGA	TGGTTCGTTGTGCTTTCTTGTGATTTTATTTAAAAGTTGTCGGATCGCAATGATCTTAAAGGAGGAGCACCCACACCAGAGCATCGAAACTGCCGCAAATGCGGCAAGGCAGGCGCAGGTCCGCTGGCGAATGGCGCATCTTAAGGCACTCAGCCGCACTCGAACACCAGCGCACGGCAATTGCTGCGGTCGCGTCGTCAGTAAAAATC
HD3A1001	L18	HD3100357	probe	FBgn0023215	Mnt	Mnt	217	GCAACAAAACAAACCACAATCA	GAGTCGCGACACGTTTACAG	GCAACAAAACAAACCACAATCAGTAACCATTTTTAACAAACAATTTTGTAAACAATATTTGAAACCAAAACCATTTTCAAAAACTTTTAACAATCATTTAAGTAACAACAAATACGAAGGATTCAACCAAAATTTATACAAAAAATAAGAACTGAACCAATTCTCAACACCAATTCAACAACTATTTCAACAAATAACTGTAAACGTGTCGCGACTC
HD3A1001	L19	HD3100262	probe	FBgn0002466	sticky	sti	207	CATAGAGGAGACCCGCAAAC	CATTCAGAGTTGCGAATGGA	CATAGAGGAGACCCGCAAACTCAGGGTCAACGCAGATGACTTCCTCATCAAGACGCTTATTGGCCAAGGATACTTTGGCAACGTTCACCTGGTGGTGGAGCGGCAAACCAACGACATATACGCCATGAAGAAGATCAAAAAGTCGGTGGTGACGACGTCACAAGTCAAGGAGGAGCGCGATATCATGTCCATTCGCAACTCTGAATG
HD3A1001	L20	HD3100358	probe	FBgn0030242	sister of feo	sofe	201	TCACATCCAATGGCAATCAT	CCGTCACAGGTAGTGCAAAA	TCACATCCAATGGCAATCATTTCGGCAACTGATCTGTGTTCTATATCTATTACCTGTACTGAAGTATTTGGCTCGCAATTGCAGACTCATCGTATTTATATGTATACACATATGTATAGTGTTAGGGCTTTTCCTAGCGCAAAGACTATCTAAATTTACAACTTTAAAATTCTTTTAACTATTTTGCACTACCTGTGACGG
HD3A1001	L21	HD3100263	probe	FBgn0038524	slalom	sll	211	AGCTGGTTGAGTCGCAGAAC	CCTGCATCCAACTGATCGTA	AGCTGGTTGAGTCGCAGAACTCGGACTACGCATGGTTCCTTAAGCTGCTGGTCAATTGCTTTGGTTATAGCTGCGTCTTTGTGCCGGGCTTCTTGATCTACAAATATGTCGGCAGGATTAACTACCTGGAAAGAGGCAACAAGACATTCCTGCACAAGGCTATCAATATGTGTATCACGGGTAACTCTGGATACGATCAGTTGGATGCAGG
HD3A1001	L22	HD3100359	probe	FBgn0003884	alpha-Tubulin at 84B	alphaTub84B	189	GGGTAACCGTCGAAATCAGT	CTGGCCGATTTTATTCTTGTG	GGGTAACCGTCGAAATCAGTGTTTACGCTTCCAATCGCAACAAAAAATTCACTGCAACACTGAAAAGCATACGAAAACGATGAAGATTGTACGAGAAACCATAAAGTATTTTATCCACAAAGACACGTATAGCAGAAAAGCCAAGTTAACTCGGCGATAAGTTGTGTACACAAGAATAAAATCGGCCAG
HD3A1001	L23	HD3100264	probe	FBgn0263993		CG43736	207	GAATGCATCGGGTAACAACA	AGGTTCATGTTGTTGGTGGG	GAATGCATCGGGTAACAACAATGGGACAAGCAACACCGGCTCCTCGGGTAATGGCTCAAACGGCAATGGCAATGCCTCCTCGAATAGCGCCTCCATGCATCTGCAGCGCCATGCGGCACTTGCTCATGCTGCGGCGGCGGCGAATGCGGCAGATAGTGCGCAGCGGCTGTGCGTCATACCCGAAATACCCACCAACAACATGAACCT
HD3A1001	L24	HD3100360	probe	FBgn0001168	hairy	h	213	CACACACGCAAACGTTGTTA	TTTTCAGGTGCTTATTTTCGC	CACACACGCAAACGTTGTTATAATTTATTTATTATTATATTATGTAATCGATTTGAGAGAACGGTATTCTACCAGGACATCGCCAAACTACCTCAGTCCAAGTACTTGGTGTTGAATTGCCTCATGTATCATGTATTACTCTTTGAATAACAGCAAATCAGCAAAAGTCTTCCAAACACAGAAAATGAAAATGCGAAAATAAGCACCTGAAAA
HD3A1001	M01	HD3100073	probe	FBgn0015929	disc proliferation abnormal	dpa	202	GCCATTGCCCCATCTATTTA	ACTGTGATCTTGGCACGAGG	GCCATTGCCCCATCTATTTACGAGAACGACGACATCAAGAAAGGCATCTTGCTGCAGCTCTTTGGTGGCACCAAGAAGAAGCATGCAACTCTCGGCCGCCAGAATTTCAGATCGGAAATTCACCTGCTGTTATGCGGTGATCCGGGTACTTCCAAGTCCCAGATGCTGCAGTACGTCTTCAACCTCGTGCCAAGATCACAGT
HD3A1001	M02	HD3100169	empty
HD3A1001	M03	HD3100074	probe	FBgn0024227	IplI-aurora-like kinase	ial	210	ACTGAAGCACCCGCACAT	CGATGGATCACGTTGTTCAG	ACTGAAGCACCCGCACATCCTGCGCCTGCTCACTTGGTTCCACGACGAGAGCCGCATCTATCTGGCCCTGGAAATTGCGTCCGAGGGCGAGCTGTTCAAGCACCTGCGTGGCGCACCCAATCATCGATTCGATGAACCGCGGTCTGCGAAGTACACCTACCAAGTGGCGAATGCCCTCAACTACTGTCACCTGAACAACGTGATCCATCG
HD3A1001	M04	HD3100170	probe	FBgn0035111		CG16940	204	GCTGCAAAAGAAGCCAGAAT	GTCTTACGGATGGAGCTTGC	GCTGCAAAAGAAGCCAGAATTTTGCCGCACAGTCATTAACTCTTGCTCGCAATTTGCTTATGAACACGCTCAAAAGATCATCGACAACCCTAATGAACGGTTTACCGAGAACGACTTTCCGACCATCCTGAATGGATTTAATCCCGATGATATCAGAAATAGGGTGCTATGGCTGCACGACATTGCAAGCTCCATCCGTAAGAC
HD3A1001	M05	HD3100075	probe	FBgn0037109	Mediator complex subunit 1	MED1	215	GACCATCCTCCAATACGCTT	TCAGTCCAGTAGAGCTGGCA	GACCATCCTCCAATACGCTTCTCCGACAATGGCCGCAAGCATGGAAGGCTTCATCAAGGGGCTCCACAACAAATTCCAGATCCCAAAGTTATCGCAGAGAGGAAGCGGAGGCAATACAACCAGTGGACGCAGCACGCCAAGTGGCAGTTCAGAACCGGCTTTAGCGGGAACATCATCTTCGATATTAGGACCTATTGCCAGCTCTACTGGACTGA
HD3A1001	M06	HD3100171	probe	FBgn0264075	tango	tgo	204	CCGTCCCGCAACTTAATCT	TAATGGATACGGGAGGTGGA	CCGTCCCGCAACTTAATCTGTGTCTCTCTTAACCACTTCTCAAGTGCAATCCATCTTACATTGTTGAAATAATTCAGCCAAACGCATGCAAATTGTAATCTCGTAAATAGCATTTTAAGTACATAGGGGTAGTCACGTACACGATTCAGATATCTTTATTTTTGTGTGCTACGTCTTCTTCACTTCCACCTCCCGTATCCATTA
HD3A1001	M07	HD3100076	probe	FBgn0019686	loki	lok	214	CACACACTGCCGCAGAAAT	TCCGATCTTCGGAAAAGCTA	CACACACTGCCGCAGAAATTGTAGTCCCTCGCGCAGTTCACATCGAACCAATGTCGTGATTTTTGTTAGTTTTCGTTGTTTTCGTCTGATAAACTCTAAATAACTATCAGCCAGCGCTGTGCGAAAAGCTCGATGTAATCGAATTGGGCAGAAGAAACGCTCAGAGATTCAAACCCATAGCTTCTATAGATCTATAGCTTTTCCGAAGATCGGA
HD3A1001	M08	HD3100172	probe	FBgn0026086	Adenosine deaminase acting on RNA	Adar	201	CGAATGACTGCACTCAGCAC	TTGCTATTGCAATGGGTACG	CGAATGACTGCACTCAGCACTATTATATAATTTTAAAAAAGACAACAGCAACGGCAAGCAATTAATAGAATTAGACGACATAGATTTTATGACAAATTCTGATATAGAATGCAAATTATATTGGGTGCAAGCACATCGCTATGATATACCACTTCATATGATTGACAACCTGCCAACTTTGCGTACCCATTGCAATAGCAA
HD3A1001	M09	HD3100077	control_th	FBgn0260635	thread	th	173	CGGTGAAGGTCTTTAATCGC	ACAACCAGAACACAAAATGGC	CGGTGAAGGTCTTTAATCGCGTCTCCTCGCGGTTTAAATCGTTCATTCTGGTTTTGTTTATATTATTTTTGAATAGCTGGGTCGCGTTCGTGTTGTTATCCACCTGATCAAAAGCGATAGGTCCATAAGACGGAAGATCAGCTACAACAGATGCCATTTTGTGTTCTGGTTGT
HD3A1001	M10	HD3100173	control_th	FBgn0260635	thread	th	173	CGGTGAAGGTCTTTAATCGC	ACAACCAGAACACAAAATGGC	CGGTGAAGGTCTTTAATCGCGTCTCCTCGCGGTTTAAATCGTTCATTCTGGTTTTGTTTATATTATTTTTGAATAGCTGGGTCGCGTTCGTGTTGTTATCCACCTGATCAAAAGCGATAGGTCCATAAGACGGAAGATCAGCTACAACAGATGCCATTTTGTGTTCTGGTTGT
HD3A1001	M11	HD3100078	probe	FBgn0032988	Tif-IA	Tif-IA	201	ACCAGAGCAATGACACGGAT	CGACTTATTCGTAAAATCATGGC	ACCAGAGCAATGACACGGATGAGTATGTCTATGGGTCTAACAAATACGGGCATTCTAGGAAACGTGGTGACTCTGAAATGCTAGAGGAAGACGAATTCCTAATTGTCGACAAACGTCCAAAGAATTTTGATCTGTCTAAAAGTCAGGAATTTGACAAACAATTTCATTTCGGATCTTCGCCATGATTTTACGAATAAGTCG
HD3A1001	M12	HD3100174	probe	FBgn0035691		CG7386	208	CTGCATTCGGAGAGTCTCAA	CCAATAGGGCCACATCAACT	CTGCATTCGGAGAGTCTCAACAATCATCTGAAGATTCATGAGAAGAGCGTGGAAAGGGCTCTGGAAACTTATAAACAGGTGCAAGTAAATGGCGATGCCAGTGACACTCAAGTGGACTCACATCAGCTGCTGAAGGTTTACGCCGAATCCGTAGCCAGCATTCCTAAGAATCCCCGCCGCGTAGAGCAAGTTGATGTGGCCCTATTGG
HD3A1001	M13	HD3100079	probe	FBgn0052251	Claspin	Claspin	202	ACCGGAAGATAAACCTGGCT	GTTCGCTTCACATTCCTGCT	ACCGGAAGATAAACCTGGCTATGCAGAAGTAACTATAAATGAAGATGAGGAAATCATAGATAAAGTTGATAGCACTGCTGAGGATGATGGCGATGCTGAAGAAAACAAAAACGATGCAGACGAAGATCCCGAAGACAATCCAGTTGAAGACAGTGAGGATGAGAAAAATGACAGTGAAAGTGAGCAGGAATGTGAAGCGAAC
HD3A1001	M14	HD3100175	probe	FBgn0020493	Daughters against dpp	Dad	218	GAAAGCACACGTCATGTTCG	AGTTGGTGCTTCGTCAATGG	GAAAGCACACGTCATGTTCGAACATTATTTGTTTTATGTTGATATTTTGACTGTTTTCGTTGTCATTATTACGTACATTCATTGTTTAAATTAAAAAATCTGTCATTTGTCAAGTGTATAAAAAGATATCACAACACGATACTTACATGAGCTGAATACCATAGAATAATTTTATTTAAATCTGTAATCACTTTATGTCCATTGACGAAGCACCAACT
HD3A1001	M15	HD3100080	probe	FBgn0015589	APC-like	Apc	208	AGGCGGACAAAAGAGCACTA	GCGAACTTCTGGCTTGACTT	AGGCGGACAAAAGAGCACTATCACTCCTCCTGCTGAAACAGTTCCCGAGAAATCCGAGGGCCAGGAAATATTGTTGATCCTAGACGACAGTGTTAAGTGCTACCAGACGGAGGATACCCCTTATGTTATATCCAATGCGGCTTCAGTCACAGATTTACGAGTCGCTGCTAAAGCGGATGCAGAAGCGGAAGTCAAGCCAGAAGTTCGC
HD3A1001	M16	HD3100176	probe	FBgn0022935	D19A	D19A	148	GGCGGGACTAAGAGACCACT	CCATCCAGATGGATTTCAGC	GGCGGGACTAAGAGACCACTTTGCAATACCAGTGATTTTTACAAATATATTTTAATAACAAAAAACAAATTTTTTAGCCCGCAAGAACATTAATCAAACCTTAATTTAATTAAAATAAGTCATTTTTAGCTGAAATCCATCTGGATGG
HD3A1001	M17	HD3100081	probe	FBgn0032051		CG13097	201	TCTGTTCCATCTCTCACCAACT	TGGAGAAAACGCTCTGGATT	TCTGTTCCATCTCTCACCAACTGGTTGTTGTTTTTGGACCCGCTCTTGCGCTCGAATTGTTGGAATATATATTTCATTTAATTAAGCACAGAAAGCAGTAGTAAAAATGATTGGAAGTAAAAAATCCAAGGAGGCGAATGTCTTCAAGGAAATCGCAGAGAACTTCGAGCAGCTGACCAAGAATCCAGAGCGTTTTCTCCA
HD3A1001	M18	HD3100177	probe	FBgn0003345	scalloped	sd	203	ACGGCAATATGAAAACCAGG	TGTTGGCTCTTGTACGTTGG	ACGGCAATATGAAAACCAGGAACCTATCCGTTGCTGGCGCCACAATTATCAAGCAATCACTCACCTCACCGCAACATCATACGGATATCGATGCCTTGACAGCACTTCAAGTGGAGGAGGTTATTTATACACAGTCACAAGGGAATACCAGTTATCAATTAGACACCGAAACAAGCATTGCTCCCAACGTACAAGAGCCAACA
HD3A1001	M19	HD3100082	probe	FBgn0036004	Jumonji, AT rich interactive domain 2	Jarid2	208	AAGCAAATCTCGCGAAAGAA	AACGAATAGCGTTTTTGTTGC	AAGCAAATCTCGCGAAAGAAAATGAAATTTGCAGCACTTGTCGTGTGTGAAATGTGAACACAGAGTGCACTAAACAATAACAAGACAATAAACAGCATTTTAGTGTTTATTTCGAGGGATAAAACCACCGCTGAGTCGCCGTTAAGATGAAGCGAAAATACGAAAATTGCGTGCTGCAGCAGAGGCAGCAACAAAAACGCTATTCGTT
HD3A1001	M20	HD3100178	probe	FBgn0261112	beta-Amyloid precursor protein binding protein 1	APP-BP1	203	GCAACAGTTAAAATTACCAACGTG	GATTTGTCTGTCGTATTTCTTGC	GCAACAGTTAAAATTACCAACGTGTTTTTTCCAACACTCCACCCAATAAACAAATTGTGTCAGAAGTATTGGCTGCCGGCGCTTTACAGTACTGGATTATTTGCAACCGGCTTATTATTGCACAAAAATCTAGTGAAATGTCCTCGCCAGCCCCCAAATCGCCAGAGCTTTCGGATAAAAGCAAGAAATACGACAGACAAATC
HD3A1001	M21	HD3100083	probe	FBgn0040010		CG17493	214	ACGATAGATTGCTGGTTCATAATTG	CGCAACACACAAGTTTACGG	ACGATAGATTGCTGGTTCATAATTGTACTCAATTTTAAGTGTCTTTACTGCTTTTACTTTGCTTTTGTGCAAATATATGTGTAGATGTTTCACAAGTGTGAACAGGCCTTAAACATTGTGTTTTTCTGGCATTCTAGTCGGCTTTATTTGAGCTGTTTCACAAACGAAAGATATGGCTTTCTTGTAATCGTGAACCGTAAACTTGTGTGTTGCG
HD3A1001	M22	HD3100179	probe	FBgn0004656	female sterile (1) homeotic	fs(1)h	221	TTGCTGAGCATGAAGCAATC	GGGAACTGGTCTTATGTGGC	TTGCTGAGCATGAAGCAATCACTACGGACCACTACACAATTTTATCCCTTGAACAAGAAGAGATTCTTATCAAAAACCAGAACAGAAGCACCAGGATCAGGAGTTGAAAAAACGATAGGCGGCGGAGGATTACCAGGAGTAGGAGTCGCAAGAACAGCAGGAGAAGGCGTAATCAGTCGCAGGAGGAGGAGGTGGTCACCGGCCACATAAGACCAGTTCCC
HD3A1001	M23	HD3100084	probe	FBgn0010356	TBP-associated factor 5	Taf5	205	CGAGGACGTCTACCTCATGC	GGATGGGTCACAAACGAAAT	CGAGGACGTCTACCTCATGCGTACTTTCCCCAGCAAGAACTCGCCATTTGTCAGCCTGCACTTTACGCGCCGAAATCTCCTGATGTGCGTGGGTCTATTCAAGAGTTAGGAGCACAGATAAGCTTATTTGGTATACGTAATGTAGTGTTAAGGAATGCTCGGAATGTTTAGGATTAATGTTTTGTATTTCGTTTGTGACCCATCC
HD3A1001	M24	HD3100180	probe	FBgn0039466		CG5521	217	CGGGATAATAGGGCACAAAA	GGGTGAAACGTGATACCCAG	CGGGATAATAGGGCACAAAAGGATCATCGGGCATTTGCCTTCCTGCTGCAGCGATTTATGGATGTTTTCCTACCAGTATTTTCACCCAACTTCGATGTCAGTTGCTCCATTTACAATCCGCGATTGGATTTGCCCGTCATGCGATCCATAAACAAAAAGGAAGAGGTAATGGCCTCTTGCGTTGTGGTCTTAATCAACTGGGTATCACGTTTCACCC
HD3A1001	N01	HD3100265	probe	FBgn0029881	pickled eggs	pigs	221	GTTGTGTCTCGGTTTCCGTT	GGTTTCTTTTCGCACACTGC	GTTGTGTCTCGGTTTCCGTTAGATCTTTTCGAAAATTTGTCTCGAAAACATGCGTTCAATTTTGCGGGAAAACGATATCACACGATGATATTTGATTTCTTTCAAGAGGATATATTGTTATAATGATTGCTATATATACTCCTCACAACCCAATCGATTTTGGGCCGTGACGCGGGATTTTTTGTTTATGTTCTTTTGAAAGCAGTGTGCGAAAAGAAACC
HD3A1001	N02	HD3100361	empty
HD3A1001	N03	HD3100266	probe	FBgn0001974	lethal (2) 35Bd	l(2)35Bd	204	CCCGTGGCTTAGCACTTTTA	ATTTCGTAGCTTGATGGTTGG	CCCGTGGCTTAGCACTTTTAAAGTTTATACTCGAAAGCATGAACAGATTATTAATTTCAGAAAAGATTAGCTCCGTAGGTTACAATTCGTAAAACTAAGGGTATGTTTGTTTGTGTTCATAGGTTTCAATTCAAATTTTATTGTCCAGTCTAGGAGATATTTAACAAATTTACGAGAAAGCCACCAACCATCAAGCTACGAAAT
HD3A1001	N04	HD3100362	probe	FBgn0011742	Actin-related protein 2	Arp2	201	GAGCAGGATTGGTCCACTTG	GAAAAGGGCTTTTGGGTTTG	GAGCAGGATTGGTCCACTTGCCCTTAGATTATCTATAATCGCAGACATGTCGTCACTGGTCGTTATCCCCGTACAATATAATGTAATATTTCTTTGAGCGCGAAAACTTTAATTCGATAGTCGCCTAAATTGTGTAACCCTGCATTAGTGTGTTTAATTGTTTATAATTACGTCTAAAATTCAAACCCAAAAGCCCTTTTC
HD3A1001	N05	HD3100267	probe	FBgn0022936	Cyclin H	CycH	201	GCCACATGCGTGTTCGTT	TTTTATATCTATCAGGAAACCCTCG	GCCACATGCGTGTTCGTTGCCTGCAAAGTTGAGGAGTTCAACGTGTCCATCAACCAGTTCGTAAACAACATCAAGGGCGACAGGAACAAGGCCACCGACATAGTGTTGTCCAATGAATTACTGCTGATTGGACAGCTCAACTACTACCTCACCATACACAATCCGTTCAGACCCATCGAGGGTTTCCTGATAGATATAAAA
HD3A1001	N06	HD3100363	probe	FBgn0035762		CG8605	205	GGACTGGTGCAGTTAGCCAT	CTTCCAGTGAAATCCAGCGT	GGACTGGTGCAGTTAGCCATTGAAAAGTTGGCGGTGGACATAGAACAGATTGCCCAGGACCAGATACTATTTGCCCATCTACTTGATGAGACGCTGGCCTTCGAATCCGAGTTACGGGAAACATTTGGGTATCCGGCTAGTTTTCCCAGCGCGATTTCTGTAATCACACAACCCATGTATTTGCTACGCTGGATTTCACTGGAAG
HD3A1001	N07	HD3100268	probe	FBgn0003124	polo	polo	225	GGCGGGTTTGCAAAATGTTA	TCTTTTCTTGCACAGCTCCA	GGCGGGTTTGCAAAATGTTACGAGATCATCGATGTGGAAACCGACGACGTCTTCGCCGGCAAGATCGTATCCAAGAAGCTGATGATCAAACACAATCAGAAGGAGAAGACCGCCCAGGAGATAACTATTCACCGCAGCCTTAACCATCCGAACATTGTCAAGTTTCACAACTACTTTGAAGATTCGCAGAATATCTACATTGTGCTGGAGCTGTGCAAGAAAAGA
HD3A1001	N08	HD3100364	probe	FBgn0037578		CG9601	203	CTCTTCACCAACCAAGGAGG	TCTTCCTGAATCTCAACGCC	CTCTTCACCAACCAAGGAGGCATTGCTCGTGGAAAAATCAACCTAGATGACTTTAAGGTCAAGATCAAGCATATTGTGGCTAAACTGGGAGTTCCAATTCAAGTATTTATAGCCATAGGTGATGGATTTTATCGCAAACCTTTGACGGGAATGTGGCAGCACTTAAAGAGTGAAATGAATGATGGCGTTGAGATTCAGGAAGA
HD3A1001	N09	HD3100269	control_th	FBgn0260635	thread	th	173	CGGTGAAGGTCTTTAATCGC	ACAACCAGAACACAAAATGGC	CGGTGAAGGTCTTTAATCGCGTCTCCTCGCGGTTTAAATCGTTCATTCTGGTTTTGTTTATATTATTTTTGAATAGCTGGGTCGCGTTCGTGTTGTTATCCACCTGATCAAAAGCGATAGGTCCATAAGACGGAAGATCAGCTACAACAGATGCCATTTTGTGTTCTGGTTGT
HD3A1001	N10	HD3100365	control_th	FBgn0260635	thread	th	173	CGGTGAAGGTCTTTAATCGC	ACAACCAGAACACAAAATGGC	CGGTGAAGGTCTTTAATCGCGTCTCCTCGCGGTTTAAATCGTTCATTCTGGTTTTGTTTATATTATTTTTGAATAGCTGGGTCGCGTTCGTGTTGTTATCCACCTGATCAAAAGCGATAGGTCCATAAGACGGAAGATCAGCTACAACAGATGCCATTTTGTGTTCTGGTTGT
HD3A1001	N11	HD3100270	probe	FBgn0038788	Sirt2	Sirt2	203	GAGCGGCAGCCAGAATAGT	GGCATTGTCCGCTTTATACAC	GAGCGGCAGCCAGAATAGTGAGGAGCTGCAACAAGGCAAAGAGAAACCGCAATCGGACCCGGATAAGATGACTTCGGGCGATAGGGACAAGAAGGATGCTTCGCTTTAGACCCTAAGATTAGTTAGTAACATCCGTAGTTAATTTGTAGTTGAATTGTGCAATTTGTTTACATGTGGATTACGTGTATAAAGCGGACAATGCC
HD3A1001	N12	HD3100366	probe	FBgn0260749		Utx	201	TTGGGTTCAGTCGATCGGT	TTTATCAGCTCGAAAAGTTTGGT	TTGGGTTCAGTCGATCGGTTGGTGCAACAACATTGCGTGGAATGTTGGACCCTTGACTGCCCGTCAGTATTCTCTTGCCATCGAGCGATATGAGTGGAATAAAGTGCAGGCCTTCAAGAGCATTGTGCCGATGGTGCATTTAAGCTGGAATCTTGCAAGGAATATTAAAGTGTCTGATACCAAACTTTTCGAGCTGATAAA
HD3A1001	N13	HD3100271	probe	FBgn0037102		CG7172	206	GGTGTCATCGCTATCGATTTT	GATATGTTGGTTCCACATCCA	GGTGTCATCGCTATCGATTTTCTCTCATCTCTATTGGAAATTAATAAACTATTTTGCTTAGACAATACAATTCAAAATGAATGTAGGCAAGATAAGCGTTGTCACCAGACTTCCTGCCCTCCGCTCGTGCGCCCAGTACTCGAGCGCTGCGAAAGCGGAACTGCCGGCTTCCTTGGTCGGCGACGTGGATGTGGAACCAACATATC
HD3A1001	N14	HD3100367	probe	FBgn0032169		CG4709	207	CCTACGTCCGTGAGTCACAA	CCTTGGCCATATCTCTTTGC	CCTACGTCCGTGAGTCACAACGTGTGGATGTCTTTACATTCTTAAACGACAGTGTTTTGGGGCCTGGAGAAAGCACTCAGCAAGGCGAGCAGGTGACCAAGAAAGCTAAGACCAACGAGCTACAGCAGCACTCAACCAAAACTCTTAACGTGGAAACAGTGCGAATTGCTGATGAAATCCGCCGAAAGCAAAGAGATATGGCCAAGG
HD3A1001	N15	HD3100272	probe	FBgn0019637	Another transcription unit	Atu	204	ATCTCTGCAGACCTGGGAAA	CATGTCGCCCTTATTGTTCA	ATCTCTGCAGACCTGGGAAAAGAGCAGCACTTTATCAAGCTTCCCAACTTTTTGTCAGTGGTCACGCATCCGTTTGATCCGGAAACCTACGAAGACGAGATCGACGAAGAGGAGACAATGGACGAGGAGGGCAGACAGCGTATCAAGCTCAAAGTGAGCAACACTATCCGATGGCGAGAGTACATGAACAATAAGGGCGACATG
HD3A1001	N16	HD3100368	probe	FBgn0015298	Signal recognition particle protein 19	Srp19	99	GGTTGCTTGCGTGGAAAATA	GCTGTCGCCATTCTTTCAGT	GGTTGCTTGCGTGGAAAATAGCTTTCTAGCTCATTTTTTGTTAATTACACAGGAATTGCAATAAACCAACCAAGAATTCACTGAAAGAATGGCGACAGC
HD3A1001	N17	HD3100273	probe	FBgn0263755	Suppressor of variegation 3-9	Su(var)3-9	82	AATCCACGGTGGTCAAAGC	AGCTTGATTGTGATGTTGCG	AATCCACGGTGGTCAAAGCCATATCCGGCGTGCAGACTGTGCGCTTCAAGAACGAACTGGAGCGCAACATCACAATCAAGCT
HD3A1001	N18	HD3100369	probe	FBgn0028689	Regulatory particle non-ATPase 6	Rpn6	201	CCACGGCCAATGCTATCTAC	CCAACATGATTTTGCACAGC	CCACGGCCAATGCTATCTACTGTCCGCCAAAGGTGCAAGGCGCACTGGATCTTCAGTCCGGCATCCTACATGCGGCTGATGAGCGTGACTTTAAGACCGCATTCTCCTATTTCTACGAGGCCTTTGAAGGATTCGACAGCGTGGACAGCGTCAAGGCCTTGACCTCGCTTAAATACATGTTGCTGTGCAAAATCATGTTGG
HD3A1001	N19	HD3100274	probe	FBgn0260741		CG3281	216	TATCGGGCATCTCTGAACATC	AACAACTGCCAGAGCTCCAA	TATCGGGCATCTCTGAACATCAGGTGTTATTAACAAGCAAAGTTTTTATTGGAATTCGTCGTTTATGATATGATGCCGAATCATGGACACACCGGAGATCCACGTAAATATAAGCTCGCAGACTTGCCGCGTCTGCCTGGAGACGCACGAGACCAATCTGTATGTCCACGATGAAATCAAATACAACGACCTTAAGTTGGAGCTCTGGCAGTTGTT
HD3A1001	N20	HD3100370	probe	FBgn0033636	toutatis	tou	222	CAGCAGCACGATCACCATT	GACCCTCTCCTCATTCCTCC	CAGCAGCACGATCACCATTGGCACCACCGTCACACCGAACAACATGGCCGTCACAGCAACGCATCCCATTGAAATGGTCACCCTGGTCGCGGCAACGCAGGAGGATGAGGAGGCAGCCGTGGAGACGACAACAGCATTAACTGAAGCAGCACAATTTTGGTCAAGAGATTAGTTTAGATTAAGCAGAGATTGTACATAAATGGGAGGAATGAGGAGAGGGTC
HD3A1001	N21	HD3100275	probe	FBgn0000404	Cyclin A	CycA	202	GGTTGGCCGATTGACAAG	GTGGCTTCCTCCAATTTCAA	GGTTGGCCGATTGACAAGCTCCCGTTGCAAGTGCCGGACAATTTTATATGTAAGCCATATAAAAGATAGTTGCCAAAATATACGCGCTTAACAACATTCGCGTCTGTCCACGGTGAGAGCTTGTCATGCCAAGCGGGAGCAGTAAGAACTTCGGCAGTCTTAAAAACTATCCGATTAGCCAATTGAAATTGGAGGAAGCCAC
HD3A1001	N22	HD3100371	probe	FBgn0086757	centrosomin's beautiful sister	cbs	205	TGACAACCGAGGAGGAAAAG	ACAAAATGGAATGTTGTTGGTAAA	TGACAACCGAGGAGGAAAAGCTGCTACACGACACATTGAATTGGAAGATGAGTTGGTTTGGCATGAAACCAACTTAAGTAGCCACAGCAATACATCACATTTGTACTCTAATCTATAGTCAATTCATAACGTTCGTGTAATATGTACATACCAATTGCATACGCAGCACTGTGTTATTTTGTTTACCAACAACATTCCATTTTGT
HD3A1001	N23	HD3100276	probe	FBgn0038877		CG3308	223	CCAGCAGCTTTAAACCCGTA	GATCGATGGTTTGCACCTTT	CCAGCAGCTTTAAACCCGTAACTCTATAGATTCAACGAGCCTGAGATTCACGATAGACTCATACCTATGTGCCTTAACCACTAATCGAATTCAGGATGAAGCGCTTATCCTGATCCCCACACATACACACATCCACAAATACGACCCCCATTGCATGCGAAAAGTACGTATACGTATATAACTATATATTCACCCCCTGCCGTAAAGGTGCAAACCATCGATC
HD3A1001	N24	HD3100372	probe	FBgn0035754	Mediator complex subunit 4	MED4	209	CAATTATTGCTTAGCACAAACGA	CAGTTCCAGCATTTTGCGA	CAATTATTGCTTAGCACAAACGATTTGCCGTGATAATGTCGTTTCATTTGAGCACAAAAGAGCGCCTTCTGCTCCTGATCGACGACATTGAGATGATTGCCAAGGAGTTGATCGAGCAGGCGCACCAGAAGATCTCCAGCACCGAATTGGTGGACCTGTTGGATTTGCTGGTGGCCAAAGATGAGGAATTTCGCAAAATGCTGGAACTG
HD3A1001	O01	HD3100085	probe	FBgn0041164	armitage	armi	219	GCGTCTGGCATCTTCCATAG	TCCACAATGCACTTTTCACC	GCGTCTGGCATCTTCCATAGACGTCGAAACGGAATACGGACAGCTGACCGTCGAGCTAGACAATATCGAGATGAACTTCATCCCAACGAATGGAGATCGAGTGCGCCTAGAGTGCAACATTCAGCTGGATGACGGTTTCGTGGACAAACAGGGAGAAATCCTAGAGGTGACAAAGTTGTTTCCCACCCGCATTCAGGAAGGTGAAAAGTGCATTGTGGA
HD3A1001	O02	HD3100181	empty
HD3A1001	O03	HD3100086	probe	FBgn0032882	Nucleostemin ortholog (H. sapiens) 4	Ns4	224	TGCCAACTGGTGTGAAACTT	CTTTTGTGTTGCGCTTTTGC	TGCCAACTGGTGTGAAACTTTTAATTCGCAAAAGGGAAAAGCCGCAACAACATTCAATCCCAATTAACTACAACTAACAGTTGGCCACCGCTGCTGGACGAAACCAAATTGACCGGGAGTGAGACCAGGACGTGACCCAAAAACGATGCCACAGCAACGGCGCAAGGTGGCCTTTAGCGGCAAGAAGAAGAAGGACCAGATGTTGCAAAAGCGCAACACAAAAG
HD3A1001	O04	HD3100182	probe	FBgn0031604	Elongator complex protein 3	Elp3	213	GGCAAGGATGCTGGCTATAA	CATGGATGGCGGATATGACT	GGCAAGGATGCTGGCTATAAGATCGTGACGCACATGATGCCTGATCTTCCCAATGTTGACTTTGAACGCGACATCGAGCAGTTTATCGAGTACTTTGAGAACCCTGCCTTCCGCTCTGACGGCCTAAAGATCTATCCCACGCTCGTCATTCGCGGCACTGGTCTCTACGAGTTATGGAAAACCGGGCGATATAAGTCATATCCGCCATCCATG
HD3A1001	O05	HD3100087	probe	FBgn0003502	Btk family kinase at 29A	Btk29A	214	AGCTGCAGCATCCAAATCTT	CGGTGAATGTAGTTATGGCG	AGCTGCAGCATCCAAATCTTGTGCAGCTATATGGCGTCTGCTCCAAGCACCGGCCCATCTACATTGTGACCGAGTACATGAAGCACGGATCCTTGTTGAATTACTTGCGACGGCATGAGAAGACCCTGATTGGTAATATGGGTCTACTCCTTGACATGTGCATACAGGTTAGCAAGGGAATGACCTACCTGGAGCGCCATAACTACATTCACCG
HD3A1001	O06	HD3100183	probe	FBgn0016054	(6-4)-photolyase	phr6-4	207	AGGCAGAGGGTGTGAGAGTG	CCTTTTGCTCCACCTCATCT	AGGCAGAGGGTGTGAGAGTGGAAACTCATTGCTCCCACACGATTTATAATCCGGAATTAGTAATAGCGAAGAATCTTGGCAAGGCTCCAATTACCTATCAAAAGTTCCTGGGCATTGTGGAGCAACTAAAGGTACCTAAAGTTCTAGGGGTTCCTGAAAAGCTTAAAAACATGCCTACACCACCCAAAGATGAGGTGGAGCAAAAGG
HD3A1001	O07	HD3100088	probe	FBgn0027499	windei	wde	212	AGGATGAAACACCGCAGAAT	ACTGTTCCCATCCTCTGTGG	AGGATGAAACACCGCAGAATGGGATATCGGAAAAGGAAGTTCAAACTATCCAAAAGGAAACAGCTTTAAAAGGACTTCCCAATGAGTCAACTACAGAATCAGTTGAAGCAAAGAATCTCCAAATAGACAATTCCGACAATGCATGCGATCAGTTCGAGAAACTGAAGACCCATGATATGGTGAAGCAAACTACCACAGAGGATGGGAACAGT
HD3A1001	O08	HD3100184	probe	FBgn0002183	dre4	dre4	210	CACGTCGAGCTGACGCTTAT	ATTCCGTGTAGAGGCGTTTC	CACGTCGAGCTGACGCTTATTCTGCTTCTTCTTCATCTGGTCGCCGCGCAATTTTTTTATCCGGCGGAATTTGCAAATGCAATTTCTGGCGTTTAGCGCATTTTAAGCGGAGTTAACGCATACACAGTAACAAATCCGGCGGCAATATGTCGAGCTTTGTGCTGGACAAGGAGGCGTTCGTGCGCCGCGTGAAACGCCTCTACACGGAAT
HD3A1001	O09	HD3100089	probe	FBgn0038327	Translin associated factor X	Trax	202	CTGTCAGAGAGCCCGTGAAC	CTGTTGATGAAAACTTATGTCTATGG	CTGTCAGAGAGCCCGTGAACTATGGCGTAAGATCACTACCATGAAGCAGAGCGTTCTTAAGGCCGAGAATGTTTGCTACAATGTAAAAGTTCGCGGCGGAGAGGCTGCAAAATGGGGCGCCACTTTTGATCAAAAGCCAGCCGATGAAGTTGACGAGGGCTTCTACTAATGGAACTCCATAGACATAAGTTTTCATCAACAG
HD3A1001	O10	HD3100185	probe	FBgn0000117	armadillo	arm	210	GACAAATACGAGGAGCTGCG	TCCATTTCGTTTACGTGGGT	GACAAATACGAGGAGCTGCGGCAGGTCAAAGTTCTGCTTCCAGAACTGAAGTCCGTGGGAGAAGGCTATTTGCTCACACACCATACCCCGCGACAAAGCATACACACACGCATACATGCATAATATTATACATTTATTATAATGCGAACGAAACGGCAAGAAAAACATATTATATGATGCATTACATATTACCCACGTAAACGAAATGGA
HD3A1001	O11	HD3100090	probe	FBgn0004556	Dead box protein 73D	Dbp73D	206	CTGCGACTTAAACCCCTCAC	GCAGCAAAGTCCCTTAGTCG	CTGCGACTTAAACCCCTCACTGTTTTTGCCTTGGTGGAAAAGTACAAATGGAAGCGATTCTTGTGCTTCACCAACAGTTCGGATCAGGCAACTCGACTAACATTCGTGCTGAAAGTGCTATTTCAAAAGTATAGCACCAAAGTGTCTGAATTGTCGGGAAATCTCTCGGCTAAGGTTCGAAATGAACGACTAAGGGACTTTGCTGC
HD3A1001	O12	HD3100186	probe	FBgn0035702		CG10147	201	GCCCCTACTGTGGTCTCAAG	TGGTGGCAAATTTCTTTTCG	GCCCCTACTGTGGTCTCAAGAAGACGACCAAAAACGAACTGCGACTGCATATCAACTATCATACTCTGGAAAGGACCTGGTCCTGCAAGGATTGCCCCAAAGTTTGCAACAGCTCAACGAGTCTTAAGAAACATATCCGCGCAATCCACGAGAAGGCACGAGATTATGCCTGCAGCTATTGCGAAAAGAAATTTGCCACCA
HD3A1001	O13	HD3100091	probe	FBgn0026324	TBP-associated factor 10b	Taf10b	201	ATTGTAATCGATGACGAACCG	CGAGGATTGTCCATGACTGC	ATTGTAATCGATGACGAACCGTAAGAAGAATCGATAGCACTGGCAGCAACAATACGGAATAATTCGATAACTAGCATCTCCCATCACTACGTCTGCACTGTGTTTAATTTGTATTGTACACTTTTTTCGATGGTGGGCTCCAATTTCGGAATTATTTACCACAACAGCGCCGGTGGCGCAAGCAGTCATGGACAATCCTCG
HD3A1001	O14	HD3100187	probe	FBgn0025808	Rad17	Rad17	202	TACACAGCCCGGAGGAAATA	CGTATGGCAACGTTTAAGCC	TACACAGCCCGGAGGAAATAACCGAAGCCTTTAATACAGAGCCCAGGAATTTTGTGAATTTTGTATATGCCAACTATCTGCCGCATTTTAAGGAAATCGATGATGTCGTGACCGCCATAAATGACTTGGGCCTATCAGATTGCATGCTCAACGAGTACAGAGATGATAATTTGTCTGTGATGGGCTTAAACGTTGCCATACG
HD3A1001	O15	HD3100092	probe	FBgn0027783	SMC2	SMC2	210	TCTTCAGCGTCGTGTCACTT	TGTTTGGCTACAATGAGGTCC	TCTTCAGCGTCGTGTCACTTTGATTCCCATCAACAAGATTCAATCTGGTTCGCTAAACAGAAATGTGGTAGAATACGCTCAAAACAAAGTGGGCGCCGAGAATGTCCAATGGGCCATGTCACTGATTGACTATGACCGCTATTACGAGCCTGTCATGAAGTTTTGCTTTGGCGGAACACTTATCTGCAAGGACCTCATTGTAGCCAAACA
HD3A1001	O16	HD3100188	probe	FBgn0035149	Mediator complex subunit 30	MED30	209	GCCGGAATGGATTACATGAG	GCCAGCATGGTGTTGATCT	GCCGGAATGGATTACATGAGCGCCGAGAGTCTGATTCCCTACCGCGATGAGCCGGAACCGAGAATCGAGCCCTCGCTGTGCGATGAGTACCGGAAAGTCCTGCAGGAGAACCATGAACTCATAGAGACCGTCAAGCTGAAGAACAGGCAGCTACGCGAGATCATCGATCGGACACGCATCATCATCTGGGAGATCAACACCATGCTGGC
HD3A1001	O17	HD3100093	probe	FBgn0032154	mitochondrial DNA helicase	mtDNA-helicase	213	CACAAGGCCATCACAACATT	CATGGCCAGATCCAGAGAGT	CACAAGGCCATCACAACATTCGGAGCAATGCGAAATGACATTCTCAGCGAGTTGCAAAACATCGAGAAAGTCAATGGAGTAAAGTGGAAGCGCTTTCCAGTACTGAATAAGCTGCTCAAAGGCCATCGGAGGGGAGAGTTGACAATCCTCACAGGACCCACGGGTAGTGGAAAGACAACCTTTATGAGCGAGTACTCTCTGGATCTGGCCATG
HD3A1001	O18	HD3100189	probe	FBgn0052344		CG32344	212	ACGACCGCTACACAGCACTT	CACGGACACCTTTTTGTTCA	ACGACCGCTACACAGCACTTGTGGTTCTTCTTAAGTACGTTATTCCGGTGCAGTCGCAAACCGTGGTGTTCGCCGGTACTCAGCACCATGTCGAACTCATTTCGTACATACTTACTGAGGCTGGAATCTCCAACGCCTCAGTCTACTCCAGCCTGGATCCAGCTGCACGCAAAATAAACACCGCCAAATTTGTGAACAAAAAGGTGTCCGTG
HD3A1001	O19	HD3100094	probe	FBgn0038389		CG5516	202	CTCAGACAGCAGCAGCGAAT	TTGATCGTCAGAAGATTCAGG	CTCAGACAGCAGCAGCGAATCGGGCTCCTCATCCGAATCAGACTCGAGCAGCTCCAGTTCGGATTCGGACGACGAGGAAGGCAGCTCGTCAGACTCCAGTGGAAGTGGCTCGGACAGCGACAGCAGCGAGGATCAAAAGCAGGGAGCTCCACAAAAAAAGAAAAAACGAGCCGGGAGTTCACCTGAATCTTCTGACGATCAA
HD3A1001	O20	HD3100190	probe	FBgn0036124		CG7839	207	TCCAAGTCGTTCAACCAAAA	TGTGTTGGAAGAATTCGCAG	TCCAAGTCGTTCAACCAAAATCATAAAAATGGACCAAAACCACAGAAAATCAAATTTGGAGAGGATAGAGAAGCAGTGCATCAAAAACCTTTCAACAAAAACAACCATAAACATAATGGTCAAAAGTCGGACTTCGCCAATAAACCTCAGAAAATCAAGTTCACTGATGATGGAGAAGATGAAGTAACTGCGAATTCTTCCAACACA
HD3A1001	O21	HD3100095	probe	FBgn0263667	Lost PHDs of trr	Lpt	202	ACAGTTTCATGGTCCCCAAC	TTCTGCTCCTCCTCTGGTCT	ACAGTTTCATGGTCCCCAACCAGTTGCCACAGGAACAGAAGTTTCACAATCAGCTATATTTGGGCGGAAATACTTTGGTTAATCCCGCCCAGCAGCTTCAGTTCCGTCAGCAGGCACCACAAAATGCCAATAAGCAGAATATGCAAACTATAATGAGCCAAGTCGTTTTGCAAACCGAAAAGAGACCAGAGGAGGAGCAGAA
HD3A1001	O22	HD3100191	probe	FBgn0021761	Nucleoporin 154kD	Nup154	205	GACGATGCCGACAAACTACA	CGTGGAGCAGATAAAGTCCC	GACGATGCCGACAAACTACATCTTGTGGCCGTTACTCAGTGTGGTGTGCGGCTCTTTTTCTCCACAACATCGCTAAATGTGAAGCAACAATTTGGTCCCGCGGTTCCTTGCAGTCCAGGTGAGAATACAGGATTCGGTCAGCCAGCAGTTCAGCCACCACTGTCTCCAAATGCTGAGGCTCCTAAGGGACTTTATCTGCTCCACG
HD3A1001	O23	HD3100096	probe	FBgn0038490		CG5285	206	GGGCAGTACATCGGAATTCTT	TCATGCCAACAAATACCAGC	GGGCAGTACATCGGAATTCTTTGATAAGCCGCTGTGGCTTAAATTCTACGAAACCGAAGTCAAGTTAAATGAGGCGCTGGAAAAACTGAATCCTCCTGAGAGCACACCGTTCATCTACAACCCGATAGTATATGCATCCCAGCTGCACTGCGACTATTTACGTCGCTATATGGACGGTCCCAAGAAGCTGGTATTTGTTGGCATGA
HD3A1001	O24	HD3100192	probe	FBgn0002044	second mitotic wave missing	swm	220	GAGCTGAGGAAGGTACCGC	TGCTGTCGTTATGCCAGAAG	GAGCTGAGGAAGGTACCGCGCGGACTTAACACCATCGCTCATTTGAACAACCACTTTGCTAAGTTCGGAAAGATCGTTAACATTCAGGTTTCGTACGAAGGCGATCCAGAGGCAGCTATCGTGACTTTTTCCACTCATGCTGAAGCTAATGTGGCCTACAGGAGCACGGAGGCGGTGCTAAACAACCGATTTATTAAGGTCTTCTGGCATAACGACAGCA
HD3A1001	P01	HD3100277	probe	FBgn0034962	MAN1	MAN1	201	CCATTTCCATTCCGTTTCAC	ATATAAAAATCGAACACTTTCGCA	CCATTTCCATTCCGTTTCACTTTGTCCCACGCCGCACCCTTGACTTAATAATTTAGTATGTGCCGTGCCGTAAAAATTTGTAATCAAAATATGGTTGTAAGACTGTTGCTTTAACGTCGGTAGTTTATTTTATATTTATGTAATTTTGGCCTGTGACACTGCAAGCCCGTGGTGTGATGCGAAAGTGTTCGATTTTTATAT
HD3A1001	P02	HD3100373	empty
HD3A1001	P03	HD3100278	probe	FBgn0025781	Cell division cycle 16 ortholog	Cdc16	208	GGCAATGGCAGCCTATTTTA	GGCACCGTCAAAGAACTCAT	GGCAATGGCAGCCTATTTTAAGGCCACACAACTGATGCGAGGTTGTCATCTCCCGTTGCTTTACATAGGTGTGGAGTGCGGGCTAACTAAAAATCTTGAGCTAGCTGAGAAATTTTTCCTACAGGCTATGAATATTGCGCCGCTGGATGTATATGTACTTCATGAGCTTGGTGTGATAAAGTACGAGTATGAGTTCTTTGACGGTGCC
HD3A1001	P04	HD3100374	probe	FBgn0002973	numb	numb	223	ACCCACGAAAGTCCACCATA	TGTACCGCAAAACTGACACTG	ACCCACGAAAGTCCACCATAAAGTAAACAACAAAACAAAAACAAATGGCACCCTCTAAGCTTAAATGCAAACTCTGTATTATACTTTGGTAATGCCCTTCCACTACTTGTTGATTGATCCCACTAAGAATAATGATTAGATACATAAATATGTATGTTGATATATAGGAAGCTCTATGTCATAGAGCCGATTATTATTTTATCAGTGTCAGTTTTGCGGTACA
HD3A1001	P05	HD3100279	probe	FBgn0033427		CG1868	201	AGTGTGCCGCCTACAGAAAG	GCAGGCTTCGCAAATACTCT	AGTGTGCCGCCTACAGAAAGGATATCCTCCGACTTTTGGGCATTTCGCATTTGGCCTTGCGATTGCTTTTGACTTACATTCCCTACATAAGGCCTCATTTGCAAGAGATGACCAGTGCAAAGGGTATGTGGGAAGAAATAATGAATCTGTCCCGAAAACCGGAAGAGAGTGAAAACGCTCCAGAGTATTTGCGAAGCCTGC
HD3A1001	P06	HD3100375	probe	FBgn0015271	Origin recognition complex subunit 5	Orc5	201	GGGCGAGCTGATAGGAGATT	GCCAGCGAGTCTAACAGGAT	GGGCGAGCTGATAGGAGATTCGAGTGAGACATATCCCTCGGCAATTTACCTATTCGGACACAGTGGAACCGGCAAAACAGCTCTGACCAGAGCTTTCCTCAAAGAATGTGGAAAACGGCAAAATGTCCGCACAGCGCATTTAAATGCCATCGAATGCTACACCACCAAGATAATGCTGGAGATCCTGTTAGACTCGCTGGC
HD3A1001	P07	HD3100280	probe	FBgn0030093	dalao	dalao	214	CCCACCACCCAGATCCTAGT	AAAATTAGGCTTCGCGAAAAA	CCCACCACCCAGATCCTAGTTGTGGTCCCTAACTTATATATGAATCGATCCCTGGTGTTGTAACATAGCTGTCCCCTCCCGGAACTTCCGGAAGGCAAACAACCGGAATGCTCTTAACTTGAAATCCCTATTTAGGCGCCACACCTAAGAACTCCACATCAATCCCATTCTCAAATTAAGTTTATATCACTTTTTTTTCGCGAAGCCTAATTTT
HD3A1001	P08	HD3100376	probe	FBgn0044020	Roc2	Roc2	218	ACCACTCCTTTCACCACTGC	TGATTTTGGTTACAATGATTTCTGA	ACCACTCCTTTCACCACTGCTGCATGTCGCTGTGGGTCAAGCAGAACAACCGATGCCCGTTGTGCCAGCAGGAGTGGTCCATTCAGCGCATGGGAAAATAAATATCTCCACCTGATATTACTTTATGCTGTGTCTAAAAAAACAACTATAAATAAAAAATTAAAAGTATAAACATATGTTTTCAGGGTTGAATTCAGAAATCATTGTAACCAAAATCA
HD3A1001	P09	HD3100281	probe	FBgn0020388	Gcn5 ortholog	Gcn5	210	CGCACTTGATGAACCACTTG	TGTTCACAATGCTTGGATGC	CGCACTTGATGAACCACTTGAAGGACTACAGCATACAGAGGGGTATCAAGCATCTGCTCACATTCGCCGATTGCGATGCCATCGGGTACTTCAAGAAGCAGGGTTTCTCCAAGGACATCAAATTGGCGCGACCAGTTTATGCGGGCTACATCAAGGAGTACGATAGTGCTACTCTCATGCACTGCGAGCTGCATCCAAGCATTGTGAACA
HD3A1001	P10	HD3100377	probe	FBgn0020497	embargoed	emb	215	GGGTCACGCGTATGTCATT	CCATCACCAACTGATTGTCG	GGGTCACGCGTATGTCATTCAACTGGGCCGCATATATCTGGACATGCTGAATGTGTACAAGATAACATCAGAGAATATCATTCAGGCCATCGAGGTGAATGGCGTCAATGTGAACAATCAGCCCCTGATCAAAACCATGCATGTGGTCAAGAAGGAGACGCTTAACTTGATATCCGAGTGGGTGTCTCGTTCCAACGACAATCAGTTGGTGATGG
HD3A1001	P11	HD3100282	probe	FBgn0000289	combgap	cg	209	TCACTCCACGGAGAGACCTT	CACCACATTCCTCGCATACA	TCACTCCACGGAGAGACCTTATCAGTGCCAGGAGTGCAAGAAGAGCTTCACCCTCAAGCACCATCTGCTGACCCATTCGCGGGTCCATAGCCGGGAGCGACCATTCGTCTGCCAGGAGTGTGGACGCGCATTTCCGCTTAAGCGACACCTGGTCACGCACAGCAAGTTCCACGCCGGCGAACGACCATATGTATGCGAGGAATGTGGTG
HD3A1001	P12	HD3100378	probe	FBgn0030246		CG1582	220	CGAGAGCGCAAGGATCTAAA	CCAGTATTTCCTGCTCCTGC	CGAGAGCGCAAGGATCTAAAAGTTATTCTCATGTCGGCCACGCTCAATGCCGCCCTCTTTTCGGATTACTTTGGCGGAGCTCCCGTGCTAGATATTCCTGGTCGAACGTTTCCAGTACAGCAGCTCTTTTTGGAGGATATCCTGGAGATGAGCGACTTTGTCATGGAATACGACACTAAGTACTGCCGCAAGCTTAAAAAGCAGGAGCAGGAAATACTGG
HD3A1001	P13	HD3100283	probe	FBgn0039183	Dis3	Dis3	202	CAAGTGTGTCAAGGCGGATA	CAGCAGGCGATGTACCATAA	CAAGTGTGTCAAGGCGGATAATCCGTACTTTAACACAATGATCCGCATCCTCACCACACGCTGTATGATGCAGGCAGTGTACTTCATCAGCGGCAGTCTGCAGAAGGAGGAGTTCTTCCACTACGGTCTGGCTGCTCCCATCTACACGCACTTTACGTCGCCCATTCGTCGTTACTCCGACATTATGGTACATCGCCTGCTG
HD3A1001	P14	HD3100379	probe	FBgn0027948	mini spindles	msps	207	CCAGCCGCTATTATCCATTC	AAATTCGTAAAATCTACCTTGTCCA	CCAGCCGCTATTATCCATTCTGTATACATTTTTCCATGCCAACATTCTGGGCAAAACGCTGAGCGTGGCCTGCATCAAAAATCTAATGTCGGCGCTGTTGAACCTTATGGCTGATCCGAAGTTGGCCGTGGGTGATGATAGTCAGTATAACAAGGTTATTAATGGCATATGTCTAAAAGTGTTGGACAAGGTAGATTTTACGAATTT
HD3A1001	P15	HD3100284	probe	FBgn0038950		CG5382	201	CTCTCTGAGGAGCAGAGCAGC	GTAGTCGCCCGCACTTGG	CTCTCTGAGGAGCAGAGCAGCAGTCTGAAGGCCATTAAGCCCAAGGTGGCAAGCCAGGCGGCTGTCAGCAACATGACCAAAGTGCACCACATCCATTCCGGTGGCGAGCGAGAGCGCACGAAGCCCAATGGCCATGACGCCGTGAGCCCACATTCCGTGCTCCTAATGGATGCATTTAATCCCCCAAGTGCGGGCGACTAC
HD3A1001	P16	HD3100380	probe	FBgn0037359	Mediator complex subunit 27	MED27	222	ATTGGCATTCGCAAAGAAAA	GAGTTGATGGCTGCGAATCT	ATTGGCATTCGCAAAGAAAACAAAGTAAACATTTTTTTTTGCCGGAACGAGAATTACCGTTATGGATAAGTTAAATTCCACTCTAACTGCCGTCAAAAACCTGCGGTCCAACGTAAGGCTGTGCTTCGAGCACCTGGCCGATGGAACCGATGGGGAGAGCGGCGAGGAGAGCCGGAATAAGTTCGTAAATGACTTCCAGGAGAGATTCGCAGCCATCAACTC
HD3A1001	P17	HD3100285	probe	FBgn0029970	Nek2	Nek2	225	GCCATCAGAAGCTAACAACG	CAATGAATGGCAGCTGAAAA	GCCATCAGAAGCTAACAACGCGCGACCAGATGGTGATCTGATCAAATTGATCAGGAAAGATGTGCAGTCCAGGAGCCATGGCAACCATGGAGACTATGAGCGTTGTGATGTGGAATAAGTTCCGAAATATTTACATTTTTTTTATGCAAAAATTTTTTTGAATGCCATATTTTAAACACGTATTATTAGCATTAAGATTCCAGTTTTTTCAGCTGCCATTCATTG
HD3A1001	P18	HD3100381	probe	FBgn0036059	nudE	nudE	212	CTATTCACCACCCCCAACAC	TGGGTTTGTAATTTCGTTCG	CTATTCACCACCCCCAACACACAAAACAAAAAAAAAGTAAAACTACGACTTGAACAACAACTGTGTTTTGGCATTTTAATCACAGCAATTAAAAACAAAGCAGCCAAAAAACACGAATAAATAACCCAAACAGTAATAGACCAACCGTAGTACATAGCATTGTTCAGAAATTAAAAGTTAAATCAATTCGAACGAACGAAATTACAAACCCA
HD3A1001	P19	HD3100286	probe	FBgn0038976		CG7048	204	ACCAACGTACAGGACTCGCT	CTTTTCAATGTAGTAGCCGGTG	ACCAACGTACAGGACTCGCTGTCGACGCTTCACGGCTGTCAAGCCAAGTACGCCGGATCCAAGGAGGCGCTGGGAACCTTTCAACCCAATTGGGAGAACCGTCAGATCCTGGTGCCCCTGACCAGCAGTATGTATGTGCCAGGACGGGTCAAGGATCTCAACAGGTTCGTCATAGACATCGGCACCGGCTACTACATTGAAAAG
HD3A1001	P20	HD3100382	probe	FBgn0031601	Dim1	Dim1	223	GCCGAGAAGGTGAAGAACTTT	CACCTCGATACACCGTTTCC	GCCGAGAAGGTGAAGAACTTTGCTGTCATCTATTTGGTGGACATTACCGAGGTGCCGGACTTCAACAAGATGTACGAGTTGTACGATCCTTGCACGGTGATGTTCTTCTTCCGCAACAAGCACATCATGATCGATTTGGGCACGGGCAACAACAACAAGATCAACTGGCCACTGGAGGACAAGCAGGAGATGATCGACATTGTGGAAACGGTGTATCGAGGTG
HD3A1001	P21	HD3100287	probe	FBgn0033741		CG8545	201	GCTGGAAAACACTCGCTGTC	GATTGTTTGCGAAAAACAGG	GCTGGAAAACACTCGCTGTCTTTTGAGCGGCGCACGTGGAGCAAAATCGAAGTGCTCACGTTTTTTTTTAAGTTCTGCTCCAAGAAACTGGATAAACTAAGTTAAAAATATGGGTCGGAAGGCTGAATACAGTGAGAAACCGAAAAAGGGACCTGGGCGCAAGGCGCGCAAGCAAGGACCGCCTGTTTTTCGCAAACAATC
HD3A1001	P22	HD3100383	probe	FBgn0002878	mutagen-sensitive 101	mus101	214	TGATTTGTGTCCTTTTCTTTTGG	TTTCATTCTAAAATAATTTGCGCTT	TGATTTGTGTCCTTTTCTTTTGGTTACTGAAAAAAATCATAATATTTGGAAGCCTTTAGCGTAATGAATTACTAATAAATTAATATCGTTAATTAACTTCAAAATAAACGAACTGAAATTGAAGTCCATTTGATAATTGTATTTAGTGATTTATTTCTAAAGGTGTTGTTGAAAATTAATTCTAAGTCAAAGCGCAAATTATTTTAGAATGAAA
HD3A1001	P23	HD3100288	probe	FBgn0039654	Brd8	Brd8	223	GACGAAGCCACTTCTTCTGC	CCAGCTTGTCCTCAAAGTCA	GACGAAGCCACTTCTTCTGCAGCTGGCACAGCAGACTCCGACGAGGCGGATCCCAACGAAGCGCAGCTGCTGGAAGTCTTCAAAAACATTGATCAAATAATAGATGACATCGACATTGATATGGCCAGTGTCATTGACGATGAGATTCTGAAAAATGTGGATGACGTCGTAGCCTCGCCATCAAACGATAAAGCCGAAGTTATTGACTTTGAGGACAAGCTGG
HD3A1001	P24	HD3100384	probe	FBgn0025455	Cyclin T	CycT	201	CCAATCCTGGAGAGAGTGGA	TCTCGATTCCGTTGGACATA	CCAATCCTGGAGAGAGTGGAAGCCTAAAACGGCCCAACGAGATCTCGGGAAGTCAGTATGGACTAAATAAGCTGGATGAAATAGATAACAGTAATATGCCTCGAGAAAAGCTTCGCAAGCTGGACACTACAACTGGACTACCAACTTATCCGAATTATGAGGAGAAACACACGCCTCTGAATATGTCCAACGGAATCGAGA
HD3A1002	A01	HD3100385	empty
HD3A1002	A02	HD3100481	empty
HD3A1002	A03	HD3100386	probe	FBgn0001941	infertile crescent	ifc	209	TTACCAAGGTGATGAGGCAA	AGTAAACGATCAGGGCGTTG	TTACCAAGGTGATGAGGCAATTGACACTGACATACCCACACTGCTGGAGGCGCGCCTGTTTGACACCACATTTGGAAAATTTCTGTGGGTGTGCCTGCAGCCTTTTTTTTACATTTTCCGTCCACTGATTATTAACCCGAAGCCACCTACACGCCTGGAGATTATTAACACCGTGGTGCAGCTAACTTTCAACGCCCTGATCGTTTACT
HD3A1002	A04	HD3100482	probe	FBgn0033526	Caf1-105	Caf1-105	214	ACCGATGGCTACTGCTCACT	CGGACGCCCTTCTAATTGTA	ACCGATGGCTACTGCTCACTGATTACCTTCGAGCCAACCGAGCTGGGCGACTGCTATGAAGATATGGAAACAGTGCTGAGCGTTGTTCTAAAATCTTCAGAGAATGCAACGGTGTTGAAAAAGAAGAGGCAAAAGCTGCGCAAGGTATCGTTGGATGAACCACGGAAACCACTGCAGGAAAAATCGAAACCAAATACAATTAGAAGGGCGTCCG
HD3A1002	A05	HD3100387	control_rh3	FBgn0003249	Rhodopsin 3	Rh3	171	GTCTTCTCCGCAGCCAAAT	GGAGCCAATGATTCCAAAGA	GTCTTCTCCGCAGCCAAATCGCTGCGAACTCCCTCCAATATACTGGTCATCAATCTGGCCTTCTGCGACTTCATGATGATGGTCAAGACTCCGATATTCATCTACAATAGCTTCCACCAGGGATATGCGCTGGGTCATCTGGGATGCCAGATCTTTGGAATCATTGGCTCC
HD3A1002	A06	HD3100483	control_th	FBgn0260635	thread	th	173	CGGTGAAGGTCTTTAATCGC	ACAACCAGAACACAAAATGGC	CGGTGAAGGTCTTTAATCGCGTCTCCTCGCGGTTTAAATCGTTCATTCTGGTTTTGTTTATATTATTTTTGAATAGCTGGGTCGCGTTCGTGTTGTTATCCACCTGATCAAAAGCGATAGGTCCATAAGACGGAAGATCAGCTACAACAGATGCCATTTTGTGTTCTGGTTGT
HD3A1002	A07	HD3100388	probe	FBgn0037384	degringolade	dgrn	201	TCGCCGAAACGGAAATTTTA	GCAGATTGAAATGTGCAAAA	TCGCCGAAACGGAAATTTTATTTTTAATAAATTATTGATTTTTATTGAATTACAAGTGTCATTCTAAACAGCATTGTATAATACCGCAAAAATCGATAGTCGATCTTAAATCCTTGTTCCCGAATGTCCGTAAAGTGTCATCTTTAAAATAACCGAATGGTCGCGTGAAAGGAGGAAACTATTTTGCACATTTCAATCTGC
HD3A1002	A08	HD3100484	probe	FBgn0031161		CG15445	209	CCAGGCAGAGCTTATCCCAT	CGAGTGATGTGATGTTCTGGTT	CCAGGCAGAGCTTATCCCATACGAAGACGCAGCACAGTTCACATTAAATAAATTTCCGTAAATAGTTCTTATTTGTCACCCGCCCAAAATTAAAGTCTACTCCACTGCACCCAACCCCGCGATTATCAACGACTGCGCATCGTTCTTTGTTGTTTCGTGTAGAAACACATGTGCAAGGAAGAAGAAGAACCAGAACATCACATCACTCG
HD3A1002	A09	HD3100389	probe	FBgn0032859	Actin-related protein 2/3 complex, subunit 2	Arpc2	201	TCGATATCCGAATGGTGAATC	TGACTGTAACAAATTGGCGG	TCGATATCCGAATGGTGAATCCAACATAAACTAAACCAGATTGCAAGACAAACCCAAGTATTCCAAACAGAACCGTAAGGCTAAATGTAAGCTCAGCAAAATAATGATCAAAGAATTAATAGTTACGCGTTAGTAAATGAATTGTGTGTGTTTGTGTCGAGTCATCGTCAAATCCGTGTCTCCGCCAATTTGTTACAGTCA
HD3A1002	A10	HD3100485	probe	FBgn0037816		CG6345	206	TCCGAGAGGGAGCTACACAG	GACGGCCAAAAAGTCACCTA	TCCGAGAGGGAGCTACACAGCTACATCGTAAAATGGAAGGCCAGGAGCAGCTCATACTTATAGAAGGGAAAAGCAAGAGGTCCGATGCTCACTGGTTCGGTCGGAATGATGCCAATATCAAGGTCATAGTTCCTTCTATATATGTACCCATATCTGGAGATTCCACAGCCAGAAAATCGTTTGGAGTAGGTGACTTTTTGGCCGTC
HD3A1002	A11	HD3100390	probe	FBgn0020412	JIL-1	JIL-1	209	CATCGATTACGTGAGGAGCA	GCCATTTAGATGATTCCGCA	CATCGATTACGTGAGGAGCACGTAGAGCATTATTAAAGGCATAGGATCTTTTACGGAAGAATCTAGCCATGAGTCGCTTGCAAAAGCAAAACTACGAGATCTTAAGCGGTACAAGTACGTCGCGCCTCAAGAATCATCAACATCCCCGTGAATCGGAGTCACTAGCCTACGAGGAGCCAGATCAAATGGTGCGGAATCATCTAAATGGC
HD3A1002	A12	HD3100486	probe	FBgn0262732	multiprotein bridging factor 1	mbf1	215	ACACAAGTCGGAAACGGAAG	ATTGTGTACGGCTGATTGGG	ACACAAGTCGGAAACGGAAGCGAGACGGACGTGAAACGCAAAAGACTAATCTGATATTAACGCGCTCATAGCTTGGAGTAGTGTTATTCGTTCATTTTGGCATTAGAGTATGTTTTGAAACTTAATCTAAGTTATGGAATTAAAAACAAGACATAAAAAGCATGTAAAACACTCTAATTTCTTTCTTTTTGTACACCCAATCAGCCGTACACAAT
HD3A1002	A13	HD3100391	probe	FBgn0010246	Myosin 61F	Myo61F	216	ACGGCAAGACCTACAAGCAG	TTCTGTCCACAATGGAGACG	ACGGCAAGACCTACAAGCAGAAGCACCGCCTGCCGCTAGACAAGATCGACTTCACGCTGACGAACCACAACGACGACCTGATGGTCATCCGCATACCGCTCGACCTGAAAAAGGACAAGGGCGACTTGATTCTGATCATTCCGCGCATAATCGAGTTCAGCACGTATATCATTGACACCGTGGGAACTGCCTCCATCGTCTCCATTGTGGACAGAA
HD3A1002	A14	HD3100487	probe	FBgn0010660	Nucleoporin 214kD	Nup214	206	CGACTAAGCCCAAAGAGCAG	TAGAGATGAACCCAGTCCGC	CGACTAAGCCCAAAGAGCAGAAAGCAGCAGAAAGCAAAGAATTCAAGGCGGTACAACCCGAAACAGAAGAGTCAAAAGTACCCCAAAAACCAAAGGCAGAGACGGAAAACAAATCCTTTGGATTTGGAGGATTTACAGGAACTGGAGGTACTGTCGGAAATACTTCCAGCTCCCCGTTCAGCTTTGGCGGACTGGGTTCATCTCTA
HD3A1002	A15	HD3100392	probe	FBgn0034722	Rtf1	Rtf1	217	CCACACGCGAGGATCTTAAC	AATCCACGATTGGTTCGTGT	CCACACGCGAGGATCTTAACAAATTGCGTCTATCTCGCTACAAAATGGAGCGATTTGTGAACTTGCCAATCTTTGAGAGCACTGTACTCAACTGCTTTGTCCGGATAAGTATCGGAAACAATGGCCAGAAACCCGTGTATCGAGTGGCCGAAATTGTGGGAGTGGTTGAGACGGGGAAGATCTACAGTCTGGGCACTACACGAACCAATCGTGGATT
HD3A1002	A16	HD3100488	probe	FBgn0262716	Actin-related protein 3	Arp3	201	GCCAGTTCAACCCCCTATCT	TCATTCAGTGTTTGAATTGGTTG	GCCAGTTCAACCCCCTATCTAAGGTGCATTATTTCTAGAAGTCGACTTTTATACCATACTCAAACACGATCACACACAGTCACACCGATCTAAGCTCTTGGAGAAATCCCGGCTCTATACACAATTAAATACGAAAACGCTCTACTTGTCATAGAAATATTTATAATTGCAATAACTGCAACCAATTCAAACACTGAATGA
HD3A1002	A17	HD3100393	probe	FBgn0003676	Tcp1-like	T-cp1	215	CAAGAAGATTGTGAACGCCA	TCATGCACAAATCATCAACG	CAAGAAGATTGTGAACGCCAAGATTGCCTGCCTAGACTTCTCGCTGCAGAAGACCAAGATGAAGATGGGTGTCCAGGTCTTGATCAATGATCCCGACAAGCTGGAGGCTATTCGTGCCCGTGAGCTGGACATTACCAAGGAGCGCATCAACATGATCCTCGGAACCGGTGTCAATGTAGTACTGGTTAGCGGCGGCGTTGATGATTTGTGCATGA
HD3A1002	A18	HD3100489	probe	FBgn0052533		CG32533	206	CGAAGCTCACCAACATCCTT	GTTGATGGTGGCAGACATGA	CGAAGCTCACCAACATCCTTTTCATTACGGAGGGCTTGTTGCTGCGGCAACTAGCGGTGGCCGCCAACCTAGACCAGTACGATGCCCTGATTTTGGACGAAATCCACGAGCGCAACTTATTCGGTGACTTTCTACTGGGTGTTACCAAGTGCTTACTGAGGGCGCGGCCGCAACTGAAGCTGATACTCATGTCTGCCACCATCAAC
HD3A1002	A19	HD3100394	probe	FBgn0010551	lethal (2) 03709	l(2)03709	201	GGCATCCAGAGCGACATTTA	CAGCTGCTTGTGCAGATAGG	GGCATCCAGAGCGACATTTACTCCGAGGGACTGCACGTGCGCATCCCCTGGTTCCAGTATCCCATTATCTATGACATTCGCTCGCGTCCCCGCAAAATATCCTCGCCCACTGGCTCCAAGGATCTGCAGATGATCAACATCTCGCTGCGTGTGCTGTCGCGCCCCGATTCCCTGAACCTGCCCTATCTGCACAAGCAGCTG
HD3A1002	A20	HD3100490	probe	FBgn0025634		CG13367	214	TGCATAGCAGAACAAGCACA	TCGCAGGAATAGGAGGGAG	TGCATAGCAGAACAAGCACATTGAAGCATTTATTGTTTTAAAAATCACTACGACCTGAATAAGGGCATGGATTAGCCATGTCAACCGACGCCGACCTAAACAAGTGCGTCAGTCCCATGTACCAGGTGTCAACCGCAGGCGACGGCCTCCAAGCAGAAGCCGCTGGAGATCTGGCGTTGGCCTCCATTGTCGCAGCTCCCTCCTATTCCTGCGA
HD3A1002	A21	HD3100395	probe	FBgn0002673	twine	twe	224	GTTGAACCAGCCATGCAAAT	CAGTGATTTCGATTGCCAAA	GTTGAACCAGCCATGCAAATACCAACAAAAAAATATACAAGCAATTTAAATTCAAACTAGAGCGTCCTGTTTAAATACGGCGCAGTGGTGAGTTAGCAGGTGGTGGGTTTGCATCGGTAGAATGGGGAATTGATAAAGGCGCCAATAAAGTTGACCGCCAAAAGCGAAACAAACAAGTCGACAGAACAAGAAAATCGTCAAGGATTTGGCAATCGAAATCACTG
HD3A1002	A22	HD3100491	probe	FBgn0034758		CG13510	209	CATCGGCACCTACGAGAACT	TTTAGCGGAAAGAGTGCCTT	CATCGGCACCTACGAGAACTAACTAACTAACGCCTATTTATGCATACAAACGTATATACCTATAGAGAACCCTAAGCACTAGCGTCATAACCGAGAAAAATTGAACTGTAAATACACATGTACGAACGCCACACATTAAACTCATGAGACTCACACAGGAAACAGAAATGCGACAAGATATCTTGGGACAAGGCACTCTTTCCGCTAAA
HD3A1002	A23	HD3100396	probe	FBgn0261394	Proteasome alpha3 subunit	Prosalpha3	209	GCCGATAAGGAGAACGTGAA	TCCGCCTGTACCTTTGTGTA	GCCGATAAGGAGAACGTGAAGCTGACGCTGGCGGACGCCAAGGATTTGGCCATCAAGGTACTGAGCATGACCCTGGACACCACCAAGCTGACCCCGGAGAAGGTCGAGATGGCCACGCTGCAGCGTGTGGACAATAAGACCGTATACAGTGTCCTGGAGAAACCCGATGTGGAGAAGCTGATCGAGAAGTACACAAAGGTACAGGCGGA
HD3A1002	A24	HD3100492	probe	FBgn0261456	hippo	hpo	209	ATATGCATACGCAATCGCAC	ATTATTGATGTTCTGCTGGCG	ATATGCATACGCAATCGCACGCCTATGTTGAGGGTGAGTTTGAGTTCCTCAAGTTCCTTACCTTCGACGATCTGAACCAGCGGCTGTGCAACATCGATCACGAAATGGAGCTGGAGATCGAACAGCTAAACAAGAAATACAATGCCAAGCGGCAGCCAATTGTTGACGCCATGAATGCAAAGCGCAAACGCCAGCAGAACATCAATAAT
HD3A1002	B01	HD3100577	empty
HD3A1002	B02	HD3100673	empty
HD3A1002	B03	HD3100578	probe	FBgn0035518		CG15011	201	GGGACCAGTGTCCACCGT	GACAGAGTTCCAAGCAGACAA	GGGACCAGTGTCCACCGTGCGAAAAGATTTGTGGCAAGCAGCTGAGCTGCAACAAGCACAAATGTCAGTCCGTGTGCCACAACGGACCTTGCTATCCGTGTAAACTGGAATCCCAGATTAACTGCCGCTGTGGAAAGACCAAAAAAAGTGTTCCTTGTGGCAGGGAAAGAAGTGCACGCATTGTCTGCTTGGAACTCTGTC
HD3A1002	B04	HD3100674	probe	FBgn0039260	Smg6	Smg6	202	GCTGGGCTGAGCTAACAATC	TGACCAATCCTACGAACACG	GCTGGGCTGAGCTAACAATCCTTTTTGAGTACATTGAATGCTTAATGGGGAAGCACAAACTTGAGAAAAACGAAATACTGTTGGATGAGGATGTGGCCCTTAGAGGTTTCACTCCGTTGGGTCGTGAAACGCTGAGCATGGACTATCTCAAAAGAGGATCCGAACGTCTTCAGTTTTTCGAACGTGTTCGTAGGATTGGTCA
HD3A1002	B05	HD3100579	control_th	FBgn0260635	thread	th	173	CGGTGAAGGTCTTTAATCGC	ACAACCAGAACACAAAATGGC	CGGTGAAGGTCTTTAATCGCGTCTCCTCGCGGTTTAAATCGTTCATTCTGGTTTTGTTTATATTATTTTTGAATAGCTGGGTCGCGTTCGTGTTGTTATCCACCTGATCAAAAGCGATAGGTCCATAAGACGGAAGATCAGCTACAACAGATGCCATTTTGTGTTCTGGTTGT
HD3A1002	B06	HD3100675	control_rh3	FBgn0003249	Rhodopsin 3	Rh3	171	GTCTTCTCCGCAGCCAAAT	GGAGCCAATGATTCCAAAGA	GTCTTCTCCGCAGCCAAATCGCTGCGAACTCCCTCCAATATACTGGTCATCAATCTGGCCTTCTGCGACTTCATGATGATGGTCAAGACTCCGATATTCATCTACAATAGCTTCCACCAGGGATATGCGCTGGGTCATCTGGGATGCCAGATCTTTGGAATCATTGGCTCC
HD3A1002	B07	HD3100580	probe	FBgn0002413	discs overgrown	dco	221	TCAGGCAGAACATGCAGAAC	CGTGGTAATCGCAATCATTTT	TCAGGCAGAACATGCAGAACCGATCATGAACACATAATAACTCGATTGTAAGTGTAATATTTGTGTAAAAGAAACAAAGGACACCGCGTTCAGCGAGTGTCCCTAACCCTAGACTATAGGCTCTAGCTCTAGCGAATCCAATCCATACAAAAGCATATGCCACACAGCAAGGCACCCACATTGTAACCTAAGTTGATGGTAAAATGATTGCGATTACCACG
HD3A1002	B08	HD3100676	probe	FBgn0262127	kibra ortholog	kibra	201	GCTCTTCCTCCAGTTCGATG	CGATGTCGTAGCAACCATTTT	GCTCTTCCTCCAGTTCGATGAGTCGCCACGATCCGGAACTACTAAGAGCCGATCTGATGTTGGCACGTGAGCGAGTCCACCAGCTGAAGCAGGAGCTAACCCACATTACCAATGACATATCCTACACGGAACGGGGCATGAACACACTGTATTCCGTGGGCGAAAAGATCAATGCTCGGGAAAATGGTTGCTACGACATCG
HD3A1002	B09	HD3100581	probe	FBgn0025381	rush hour	rush	211	CGACGGAACCAATCGACTAC	ATCCTCTCGCCAAACATACG	CGACGGAACCAATCGACTACCAAACGTTTGATAGCCCTGTCCAAATTTAAATGAAGTGAAGTCGATGCTACACATAATCGTGTTTACCGATGCATAGTTTTACCAGATTAACACAATTTTTGTCTCTTAACATTAACATTACTTTTACGCATATATCGTTCCCGTTTTTGGCGGATAAGAACCACTAAAATCGTATGTTTGGCGAGAGGAT
HD3A1002	B10	HD3100677	probe	FBgn0029873		CG3918	201	GGAAAGGGAGCGGGAGAG	CTGCTATTGTTGGTGTTTGTGG	GGAAAGGGAGCGGGAGAGAGAGAAGGTGAAGGAGAAAGAGAAGGAGAAGGGTAGCCGGAGCAAGGACAAGAAGCGTAGCCACTCAAAGAGCAGCCACAAGCTGGCCGAGAAGAGCAAGGACAAGAAGTCGGTGCGGCACAAGAAGCATGGCAAGAAGAGGAGCCGGAAGCACAAAAAGACCACAAACACCAACAATAGCAG
HD3A1002	B11	HD3100582	probe	FBgn0032409	Ced-12	Ced-12	206	GGAGGAGTTGCCCAAGAAAC	CGTTTATTCCATCCGTCCAG	GGAGGAGTTGCCCAAGAAACTGCCCATCAGTGAGATTAAGCAATTGCTAGAGGGCAAGGAATGCCCGCATATGAAGGAAACTCGCATTCGGAAATCGGCGGTAAACCTGGCCTTTTCCATCACCTTCGAAAACATGGAGCACTCTACGTTGGACTTTGTGGCACCCGACGAAAGCATATTCAACTACTGGACGGATGGAATAAACG
HD3A1002	B12	HD3100678	probe	FBgn0002906	Bloom syndrome helicase ortholog	Blm	203	CATATTGCGCGGGTTTTTAG	TGCTCTTAGGTTGACTCTGGG	CATATTGCGCGGGTTTTTAGTCCGAAAGTGTATAAAATTGTATTGCTTACTTATTTGTTAACTAGTTGTATGCAAATTAAAGCGCTGACATCTGTTTAAATCGCTGGTCGTGATGTCCAAGAAGCCTGTCGCGCAAAGAAAACAGCTCACACTTAGCAGCTTCATTGGCCTGGATGGCAATTCCCAGAGTCAACCTAAGAGCA
HD3A1002	B13	HD3100583	probe	FBgn0010406	Ribonuclease X25	RNaseX25	212	CCACCGCTACAAAGGAAAAG	TTGTTAAGCTCCGAATCTCCA	CCACCGCTACAAAGGAAAAGCCATTGGAAGTTACCGCTCGTAAACGTCTACAAGTTGCTGCAATTCCTCATGTGGTTCACCTTGTAAACAGGTCGTTGTGTAACCCAAGCTGGGAAGTATTTTGAGGCGCGCCTTAGGAGGACTCATCGTTAACTCCAATTTTATTTGATACTTCCACTGATTTGGTGTGCTGGAGATTCGGAGCTTAACAA
HD3A1002	B14	HD3100679	probe	FBgn0260991	Inner centromere protein	Incenp	202	GTGTTGGAAAGCAGAGGCAT	CCCAAGATGTCCTCCATATCT	GTGTTGGAAAGCAGAGGCATAAATGCGCCTTACAGCACCCGACGAGCTGTTAACTGTCAACAGTGCACAATTAAAGGCATGTTATCAAATGCTGACGCGCGTCGCAATTGCCGCCATTTGAAAAAAACGATAAAATCGAAGGAACCGAATCCGGATTTGCAGTTTGTCAGATACAGTCGCTAGATATGGAGGACATCTTGGG
HD3A1002	B15	HD3100584	probe	FBgn0015024	Casein kinase Ialpha	CkIalpha	220	TGGATGCGTGGATGTAAATG	TCACATTTGCTGGGGTATCA	TGGATGCGTGGATGTAAATGACGTTGATGTGGGCGAAAGGCCCGGCAAGGAGCGGAGCAAATATGAAACAGACGCAACCGTAAAATTGAGTAACACCAGCGGTCGTCCGAATGTTTCTTAATATTAATTTAAATTCAATACTAAACAAATAAGGAACCACAAACAAGCAAGCAACGGCATCATCAGCAGGGCATATAAAATGATACCCCAGCAAATGTGA
HD3A1002	B16	HD3100680	probe	FBgn0052857		CG32857	225	CGCAGTTTTAAGGGCATCTC	GTTGGGGAAGTCGTACGTG	CGCAGTTTTAAGGGCATCTCCAACACGCGTAACCATCGCATACCGGCTCACCAGGAATCGGGATGTGGTCACTCAGTGGGATGCGGGCTGCTAGAGTTGCGGATGCCGGTGGCGTGCAGGAGGAGCATGTTCATCCAGACGCAGGACACTCCGAATCCGGAGAGCTTGAAGTTCCTGCCCGGCGTGGACGTCCTGGGAAAGGGGAACACGTACGACTTCCCCAAC
HD3A1002	B17	HD3100585	probe	FBgn0010747	Signal recognition particle protein 54k	Srp54k	215	CGAGCTGAAGCTAGACGGAA	CCATCATCGTCATCATACGC	CGAGCTGAAGCTAGACGGAAACGATGAGCTGTTAGAAAAGATCAAGCACGGTCATTTCACCATCCGCGACATGTACGAGCAGTTCCAGAACATCATGAAGATGGGCCCCTTCTCCCAGTTCATGAACATGATACCCGGTTTCTCGCAGGACTTTATGACCAAGGGCGGCGAACAGGAGTCGATGGCGCGCGTTAAGCGTATGATGACGATGATGG
HD3A1002	B18	HD3100681	probe	FBgn0023423	supernumerary limbs	slmb	205	GTGGTTTCGCAGTCCGTATT	TGGCAAAGGCAAACTCAACT	GTGGTTTCGCAGTCCGTATTTGGGCGAGATCTGGTAAAAAAAAATAAAATTCTCCGTGTGAAAAGTGAGTGTCCAGTAGTTGGCGTCATCTGAATAAGCAAAAACAAACAACGTGCAAGCCGCCAGGAGCGGTGAGAATAATGACTTGCATACGACATTCGCTCAATTGGTGAGGGACCTCGGCAAGTTGAGTTTGCCTTTGCCA
HD3A1002	B19	HD3100586	probe	FBgn0040918	schlank	schlank	202	CGTCTCTGGGCACACTGTATT	CTTTGCCGTTTGTTTGGG	CGTCTCTGGGCACACTGTATTGTTGTTGCTCGACGAGGAAATACTATTAGTATTTTTTTTCGTTCATCCTGAAAGTTTAAGTGGACGAAACGAGCGGCGGCCGACTCGACACCGAGCCGAAATTCAGAAAGTCTATTGCTTTGGTCGAGAACAGATTGTCAGGGAACTTCACTTCATTTACGCTCCCAAACAAACGGCAAAG
HD3A1002	B20	HD3100682	probe	FBgn0027492	widerborst	wdb	225	ATTTCCAGTGGCAAGCGTTA	AATTGCTGCAGCTCAACATC	ATTTCCAGTGGCAAGCGTTAAAAACAAAGCCGGCAAGCTGAATACCACACAGACAGCCACGGAGACCGCCATCGATTCAAACGAACCCAAATCTGAAAAGATGTCATCGGGCACGTTTGTGGATCGAATCGACCCGTTCGCCAAACGTTCGCTCAAGAAGAAGGGTAAAAAGAGTCAAGGTTCCTCGCGCTACAGAAATTCTCAGGATGTTGAGCTGCAGCAATT
HD3A1002	B21	HD3100587	probe	FBgn0051064		CG31064	217	AAGGACAAGGAGAAGGCGTC	GCTTTCGGTACATCTCCAGG	AAGGACAAGGAGAAGGCGTCCGAAGAGCTGGTTGAGGAGCGTCGCAAGAACAGCGAGCTGGAGAAGGAGCTCAAATTGCAGGTGTCCCTCAAGGCGGAATCGGACATGGCCATGAAACTGCTGGAGAAGGATATTCACGAAAAGCAGGACACGATAGTCTCACTGCGCCGCCAGCTGGACGATATCAAGCAGATCAACCTGGAGATGTACCGAAAGC
HD3A1002	B22	HD3100683	probe	FBgn0020655	ADP-ribosylation factor GTPase activating protein 1	ArfGAP1	211	GCCCAACTTCCTTTGGTTTT	CCTTTAAAGTCCACGGATCG	GCCCAACTTCCTTTGGTTTTCCATGCAATATTCGGTATATCGATGCTGTCGTGAGTGGTCAGCTCATCTCCAATTCCAAGTGGGACACGCTTAACACTTTTTTTTTGCCAATTTGCCATTAATTGCAAGCGTCCCAGCTGATCCAAAAAAATTCAAAACTCTGTTAAATGCGTTTGGCCAGGCGTTCGTCGCGATCCGTGGACTTTAAAGG
HD3A1002	B23	HD3100588	probe	FBgn0026777	Rad23	Rad23	205	GTTGACACGCGATTCGTCTA	CAACTCGCCAATCAATTCGT	GTTGACACGCGATTCGTCTAGTTCAAATCGTAATCAACTTAGTGTAAAAGAAAGTAATAAATTGACTAGCACCGACGATTCAAAGCAATCTATGCCTTGCGAAGAAGCCAACCATACCAATTCGCCTAGTTCCACAAATACAGAAGATTCAGTTTTATCACGTGAAACCAGACCTTTATCTAGTGACGAATTGATTGGCGAGTTG
HD3A1002	B24	HD3100684	probe	FBgn0030067	RNA-binding motif protein 13	Rbm13	81	GTGTTGAATTTGCACGTGTTT	TGGCGCCGTTTTGTTATTA	GTGTTGAATTTGCACGTGTTTCAAAGTAAGTTGGTTGTTTTTTATCATTGAAGGCATTTCGTTAATAACAAAACGGCGCCA
HD3A1002	C01	HD3100397	probe	FBgn0014184	Ornithine decarboxylase antizyme	Oda	202	GGACGATGACTGCCAGGA	CTCCAGAAGCGAGATGAAGG	GGACGATGACTGCCAGGAAGTGCTGCGCCAGATCTTGCAGCACGACCAGCCGGTGCAGATCACCATCAAGCTGCATGTCACCGAGGACCAGTACACCAATTGGAATACGATTCTGAACCCAGTCAACAACTTGTTGTATGTCGCTCTACCGAAGGACCTTCCTCCGGCCGGCTCCAAGCAGACCTTCATCTCGCTTCTGGAG
HD3A1002	C02	HD3100493	empty
HD3A1002	C03	HD3100398	probe	FBgn0028647		CG11902	201	CAGTGCATGATCTGCCTCTC	GTCGAATTCCCTTTGCACAT	CAGTGCATGATCTGCCTCTCACGCCACTCAAAGATCAGTGATCTAAGGTCTCATTTGAGTTCTCATCAATACGAACTGAGTTTCGCCGAAGACAGAGATATTCCGAGTGCTTCAAAAGCTTTTTACCCAGATCTGGAAAATACTCTAGAAAAAGATGAACTGGCCGAAATGATTATGGCTGATGTGCAAAGGGAATTCGAC
HD3A1002	C04	HD3100494	probe	FBgn0050085	Rap1 interacting factor 1 homolog	Rif1	207	TTCTTGACGGACCTGAAAGC	GTTTAAACAGGCTTCGAGCG	TTCTTGACGGACCTGAAAGCCACACTTACAGACCTCCTAAAGAGCAAGGATGAACCGCTCTTTGCAGAGCTCTTCGATGCTTATGTGACCTCCTTAATCAAGTTTGGACTCTGTAAGGAGGCACCTTTGTATAAGGACGTTTTTGGGCTACTTCAAACCATTTTCGAGCAGCCCTCCTCCCAGAAAACGCTCGAAGCCTGTTTAAAC
HD3A1002	C05	HD3100399	control_rh3	FBgn0003249	Rhodopsin 3	Rh3	171	GTCTTCTCCGCAGCCAAAT	GGAGCCAATGATTCCAAAGA	GTCTTCTCCGCAGCCAAATCGCTGCGAACTCCCTCCAATATACTGGTCATCAATCTGGCCTTCTGCGACTTCATGATGATGGTCAAGACTCCGATATTCATCTACAATAGCTTCCACCAGGGATATGCGCTGGGTCATCTGGGATGCCAGATCTTTGGAATCATTGGCTCC
HD3A1002	C06	HD3100495	control_rh3	FBgn0003249	Rhodopsin 3	Rh3	171	GTCTTCTCCGCAGCCAAAT	GGAGCCAATGATTCCAAAGA	GTCTTCTCCGCAGCCAAATCGCTGCGAACTCCCTCCAATATACTGGTCATCAATCTGGCCTTCTGCGACTTCATGATGATGGTCAAGACTCCGATATTCATCTACAATAGCTTCCACCAGGGATATGCGCTGGGTCATCTGGGATGCCAGATCTTTGGAATCATTGGCTCC
HD3A1002	C07	HD3100400	probe	FBgn0033380	Phosphorylated adaptor for RNA export	Phax	203	GCGGGGTATTCCTGTTCCTA	CTCTTTGCGCTGATTTAACG	GCGGGGTATTCCTGTTCCTAATAAAGCACCACGATAACATCACTCAGGAGCAGCAGAAGCGCATTTTTAGTGAGGATCGCCAGAGTCTGAGCAAGTCTCGAAAGCAGATCGAAACGTTGATGCGGGACCGTAAGGTGGAAGAGTTGAAGAAGTGCCTCAGCAAGCAGGTTACGGAACTGCCGACGTTAAATCAGCGCAAAGAG
HD3A1002	C08	HD3100496	probe	FBgn0034528		CG11180	220	TCGATGATGACGACTTACACAG	GCGGGAGGTGTTTCTTCTAA	TCGATGATGACGACTTACACAGAAATAATGAATCGCATACTTCGAATGAAAATAGAACTAAAAATAAAAGTAAATCTAAGGACAGTCAAGAAACCACTCAAATTCAGGAAGAAATTACCATAGATTTAACAGCCGAAGCTCCGTCTAAGAAGAAAAAGAAATCCAAGGAAGAGAAGCGTAAGGACAATGATGAAAAAGATTTAGAAGAAACACCTCCCGC
HD3A1002	C09	HD3100401	probe	FBgn0034650	Negative Cofactor 2alpha	NC2alpha	201	GCAACGCCAAGACGCTATC	GCAGGCTAAGATCATATGGCG	GCAACGCCAAGACGCTATCGCCATCGCACATGAGGCAGTGTATCGTATCCGAGAAACGCTTTGACTTCCTCAAGGAGCTGGTCCGCAACATACCCGACATCAGTGTGGCCGAGGAGGCCGCCTACAACGAGGACGATGTGTTACGCAGCTCGCCAGAGGAACAGTATCCAGATTCAGACACGCCATATGATCTTAGCCTGC
HD3A1002	C10	HD3100497	probe	FBgn0039680	CAP-D2 condensin subunit	Cap-D2	208	TCGAACACCGAGTTAAGGCT	GGGAGATGATATCTGGCAGG	TCGAACACCGAGTTAAGGCTAACTGCCGTCAAAATGCTATCTCATCTGATCCTCAACGAGATGATACGCGTCAAGGGTCAAATCGCCGACATGGCACTTTGCATTGTGGACGGCAACGAGGAGATTCGCAATATCACCAAGCAGTTCTTCAAGGAGATAGCCAACAAGTCGAACATTCTGTACAACGTCCTGCCAGATATCATCTCCC
HD3A1002	C11	HD3100402	probe	FBgn0041100	parkin	park	202	GTTGCAATTTGGAGGGAAAA	TATTGTCGTGGCATCGCTTA	GTTGCAATTTGGAGGGAAAACCCTTACGCACACGCTGAGTATTTATGTAAAAACGAACACGGGCAAAACGCTGACCGTTAATCTGGAGCCCCAGTGGGATATTAAAAACGTAAAGGAACTGGTGGCACCACAATTGGGACTTCAGCCGGATGATCTAAAGATCATATTTGCCGGTAAGGAACTAAGCGATGCCACGACAATA
HD3A1002	C12	HD3100498	probe	FBgn0025637	skpA	skpA	201	GCGCACAGACGACATTATCT	GGCGAAAAGTCCTTCTTAATG	GCGCACAGACGACATTATCTCATGGGATGCAGATTTCCTAAAAGTCGACCAGGGCACACTGTTTGAGCTGATATTGGCAGCGAACTATCTGGACATTAAGGGCCTTCTGGAGCTCACCTGCAAGACTGTTGCAAACATGATTAAGGGAAAGACTCCCGAGGAAATACGCAAGACCTTCAACATTAAGAAGGACTTTTCGCC
HD3A1002	C13	HD3100403	probe	FBgn0014879	Set	Set	222	CTGACAAAGCCGTACGGAAA	GTCGTCAAATGCCTCCTCAT	CTGACAAAGCCGTACGGAAACAAGAAGAAGCGCAACTCCGAATACAAAACCTTCTTCGATTGGTTCTCGGATAACACCGATCCCGTCAACGACGAGATCGCAGAACTGATAAAAGACGACCTTTGGCCAAATCCACTGCAGTATTATCTGGTACCTGATATCGAGGTGGAGCCCGAGGACGAGGAGGACAACGAAGATAATGATGAGGAGGCATTTGACGAC
HD3A1002	C14	HD3100499	probe	FBgn0027066	Eb1	Eb1	103	TGGCTTCATAACAAAATGATTG	CAAACTTTTTAACGAGTTCTGCC	TGGCTTCATAACAAAATGATTGTATAAAATAAGTGATTTTTGCTCTCAATTTTTTAAGTTCTATATTTATGTGTAAAACAGGCAGAACTCGTTAAAAAGTTTG
HD3A1002	C15	HD3100404	probe	FBgn0263289	scribbled	scrib	224	TTCCCGACGATATCAAGCAT	GCTTATTGTCTCGGGCAGAT	TTCCCGACGATATCAAGCATCTGCAGAGCCTGCAGGTGGCTGATTTTAGTTCGAACCCGATACCCAAGTTGCCTTCGGGCTTCTCCCAGCTAAAGAACCTGACCGTCCTGGGACTCAACGACATGTCGCTCACCACATTGCCAGCGGATTTTGGCAGCCTGACTCAATTGGAATCCCTGGAGCTTCGCGAGAATCTGCTCAAGCATCTGCCCGAGACAATAAGC
HD3A1002	C16	HD3100500	probe	FBgn0040233	CENP-ana	cana	201	TTCGCATAAGTTGCTGGTTC	GCAGCTATTCAACACTGACGC	TTCGCATAAGTTGCTGGTTCTAATAATAAAAGACATAAATTACTTAAATGTAAATCTAAATAAGCATAACGCTTCTTGTTTGAATTCCCGATTGCACCAATCGATAAGTCGATAGTAGCGCAAATACATATTCTAGTGTTGTGCATTGGAAAATTGACGGCCGCTTGAGTGTTGTGTACGGCGTCAGTGTTGAATAGCTGC
HD3A1002	C17	HD3100405	probe	FBgn0028700	Replication factor C 38kD subunit	RfC38	201	TGGCACGAAAACAGTGTAAATG	TGCAAGCTTCGATGTTTTTG	TGGCACGAAAACAGTGTAAATGTAATAATATTACTTTAAAATTAATTTTAATTGTGATCTGTTAAAGTATTTAATTTTTTAAATCATTCAAGCCGAAATAATCATTTGAAAATATGTGCGTGGCAAATTTAATGAAACCTCTAAACATCGATATCACAGCGTAGAAATCGACAATAATCATCAAAAACATCGAAGCTTGCA
HD3A1002	C18	HD3100501	probe	FBgn0028292	ric8a	ric8a	208	TCCAATCTGGCTTTGATTTC	CGGGACAACAAAATAACAACG	TCCAATCTGGCTTTGATTTCAGTGATCAGCTTTTGTCTAAATGCCATTATTATTAGTGTTAGCTAAAATAATTATAATCTATCCAATTAGCTTCAATTCGTAGATAAGTTCGGTCTCCCAACTTTTACAGAATTTCTTTAACCATTAACCATGTAGAACGTTGTACTTATTAAGTTATTACGCACTTCGTTGTTATTTTGTTGTCCCG
HD3A1002	C19	HD3100406	probe	FBgn0023172	Rho guanine nucleotide exchange factor 2	RhoGEF2	204	CCATTGGAATAGTGCAACCA	CCACTCGAAGTCGGAGGAT	CCATTGGAATAGTGCAACCAAAAAATCATAAAACAGAACTAAAGCAACGAAAATCGAGGCAATTAAATCACTTCTGGATTCATTTCGGCCCGTTTTTACTAGCTAATTTAAAAATAGCTGCCGAAAGCATTCCGCAACCACTTCTGGTGACTGGCCCCACACCAATGCGAACAATACTCCACGGGATCCTCCGACTTCGAGTGG
HD3A1002	C20	HD3100502	probe	FBgn0031873	Gas41	Gas41	92	GAAGACGAAAACGTTGGACA	CACGTGCCAGCTTTAGTTTG	GAAGACGAAAACGTTGGACAACATTGTGAATGTAAAACAGAAGGTCAAGGGGGAGATTGTTACACTTAAGGACAAACTAAAGCTGGCACGTG
HD3A1002	C21	HD3100407	probe	FBgn0028684	Regulatory particle triple-A ATPase 5	Rpt5	222	GCTTACTTGCCGCTGAAAAA	CACAATTTCATCGGTGGACA	GCTTACTTGCCGCTGAAAAACAAGAAATTTACAAGTCATCGACAGAGTGTTTGCCCAAAAAGATCGGCAATAATAGCATTTTAACAAAGAATTACATTCAGCAACGGCTAATCAACAATCGTATTAGACATGGCTCAGACTCTGGAGGATAAGTCAATCTGGGAGGACGGGGAGGAGTCCCTGGGCGAGGAGGTGATGCGTATGTCCACCGATGAAATTGTG
HD3A1002	C22	HD3100503	probe	FBgn0051151	winged eye	wge	205	GCACGAGGATGAGAACGATG	CAGCTCTTCGAGAGTTGGAA	GCACGAGGATGAGAACGATGTGCAGACCATTTCGCATCGGTGTGAGGTGCTGCAGTTTGGCAGTTACTTCGAGAAGTTCGGTGCCGATTCGAAGCAATATCAATCCATATACGATAACAATGATACATATTATTTAGCCGGGCACTATAACCCAAGGTTACAAGTGCTAAAACTACAAGACGATATTCCAACTCTCGAAGAGCTG
HD3A1002	C23	HD3100408	probe	FBgn0013531	Mediator complex subunit 20	MED20	210	ACTGGTCACACTGGACGCTT	AGTCCACCAGAAATTGACCG	ACTGGTCACACTGGACGCTTTTAGCTTGCAAGACTTGTAAACAAAATTAATAAAACTAAAAAGCTGACATTATTGCATAAACTATGGGAGTAACTATCCTTCAACCGTATCCCTTACCCGAAGGCAAATCGGGTGCCCACATAATCGATCAGCTGAGCAAGCGTCTGCTCGCCCTGGGCGCCACACATGCCGGTCAATTTCTGGTGGACT
HD3A1002	C24	HD3100504	probe	FBgn0037716		CG8273	207	ATATCTTTGAGCCCTGCGAA	CCCTTTCTCTGTGTTCTCCG	ATATCTTTGAGCCCTGCGAACTGTAGATACCATTACGAGTGTCATCGCTATTATTGAAACTTCTGTCCAAGCAAGACGTGCAGAAAAACGCTTAATCGCGAACAGCGACAAATTCGCTGATCTGTTGCGGTAATCTATTAGCATGCATAGACACTAGGACGATCCGCGCCCAGCGAGAGAGCAATGACGGAGAACACAGAGAAAGGG
HD3A1002	D01	HD3100589	probe	FBgn0005616	male-specific lethal 2	msl-2	224	GGAACCCAACGAAATCTCTG	GTGTTTTTGTGGCAACATGC	GGAACCCAACGAAATCTCTGATCAATTGGCTAATCTGCAAGTTGAGGAATCTGATGAGGCTCTGGTTGAAGAGACCGTTGAAGAGGCCGAAGGGACCTCAATCCCGTCAGAGGTTGTAGCTGAGCACATGGAGGAGGATCAACACTTGGATGTGCACACTTCACAGTCACCTACACAAACCGAAATGGAGGAAGCAGTGGAGGAGCATGTTGCCACAAAAACAC
HD3A1002	D02	HD3100685	empty
HD3A1002	D03	HD3100590	probe	FBgn0004391	shattered	shtd	214	ACAGTCAGTGGACCGGACTT	CATCCAGAGTCACCACTTCG	ACAGTCAGTGGACCGGACTTGCAGCGAGCCTTCTGCGTGATCAATTACTACAATCTGTTGCCGAATATGTTGAATGGAGTGGACTTGAGCACGGGCACAGTTAACTATATGCGTCTTTTATACGAATTCCGCCGGCTGAATCTCGGCGCGCACACCATATTTGGCCTAATGAAGATCCTACAGTCACTGGCCACCGAAGTGGTGACTCTGGATG
HD3A1002	D04	HD3100686	probe	FBgn0035357		MEP-1	201	AGTCCAGTGCAGCTGAATCC	CAGCGCATACTTGGTCTCAA	AGTCCAGTGCAGCTGAATCCGCCAACGTTATCGCTTACCGGGCTGCCCAGCATGACCAACAACGCCAACCTGCTGCCCGGTCTCACTGACGACATGTTTGTCCTGGAAGCGCCCTCCTTCATTGTACCCTACATCTATGAAAAGCCACCACGCGAAAACATCTGCGAGGTCGTCAAAGCAATTGAGACCAAGTATGCGCTG
HD3A1002	D05	HD3100591	control_rh3	FBgn0003249	Rhodopsin 3	Rh3	171	GTCTTCTCCGCAGCCAAAT	GGAGCCAATGATTCCAAAGA	GTCTTCTCCGCAGCCAAATCGCTGCGAACTCCCTCCAATATACTGGTCATCAATCTGGCCTTCTGCGACTTCATGATGATGGTCAAGACTCCGATATTCATCTACAATAGCTTCCACCAGGGATATGCGCTGGGTCATCTGGGATGCCAGATCTTTGGAATCATTGGCTCC
HD3A1002	D06	HD3100687	control_rh3	FBgn0003249	Rhodopsin 3	Rh3	171	GTCTTCTCCGCAGCCAAAT	GGAGCCAATGATTCCAAAGA	GTCTTCTCCGCAGCCAAATCGCTGCGAACTCCCTCCAATATACTGGTCATCAATCTGGCCTTCTGCGACTTCATGATGATGGTCAAGACTCCGATATTCATCTACAATAGCTTCCACCAGGGATATGCGCTGGGTCATCTGGGATGCCAGATCTTTGGAATCATTGGCTCC
HD3A1002	D07	HD3100592	probe	FBgn0000212	brahma	brm	203	AGGACGGAGGAACAGACGTA	AGCGAAATGGTTTGAATGGT	AGGACGGAGGAACAGACGTACTACAGCATCGCTCATACCATTCATGAAAAGGTTGTGGAGCAGGCCAGCATCATGGTTAATGGTACGCTCAAGGAATACCAGATCAAAGGCTTGGAGTGGTTGGTTTCGCTGTACAATAACAATCTAAATGGTATTTTGGCCGATGAAATGGGTTTGGGTAAAACCATTCAAACCATTTCGCT
HD3A1002	D08	HD3100688	probe	FBgn0015019	Cctgamma	Cctgamma	202	TGACTGCTCGCTGGAGTACA	GCCAGCCTTCAGCAAATAGT	TGACTGCTCGCTGGAGTACAAGAAGGGCGAGAGCCAAACCAACGTGGAGATAATCGGGGAGCAAGACTTCACCCGCATGCTGCAGATCGAGGAGGAGTTTGTGCAGCGCATCTGCGCCGACATCATTGCCGTGAAACCGGATTTGGTATTCACTGAGAAGGGTGTCTCCGATCTCGCCCAGCACTATTTGCTGAAGGCTGGC
HD3A1002	D09	HD3100593	probe	FBgn0037843		CG4511	217	CCTGGTGAAGGACAGCAAGA	GGAGTCATCCGAGTCGTAGC	CCTGGTGAAGGACAGCAAGACCAAGGACTTCATTGTCGGATTCACCGATCTGGGCAACTGCGACGACTTCGCCACCGAAATGCTGGAGTGGCGCATCGCCCACTCGGGGGCCATTGACTACAAGGGCGATCTGATGCAGCCACCAGATGTGAAACGCAAACCATTCATCAACCGCCCACAGAAGACAATACGTGGAGGCTACGACTCGGATGACTCC
HD3A1002	D10	HD3100689	probe	FBgn0001078	ftz transcription factor 1	ftz-f1	208	GGATAGAATGCGTGGTGGAC	CTGAGGTATTTGAATTTCCTGCTT	GGATAGAATGCGTGGTGGACGCAACAAATTCGGACCCATGTACAAACGGGATCGCGCGCGGAAGTTGCAAGTGATGCGGCAGCGGCAGTTGGCGCTGCAAGCGCTGCGCAACTCGATGGGTCCGGACATCAAGCCAACGCCGATCTCGCCGGGCTACCAGCAAGCATATCCAAATATGAACATTAAGCAGGAAATTCAAATACCTCAG
HD3A1002	D11	HD3100594	probe	FBgn0030054	Caf1-180	Caf1-180	204	GGAGCAAAACCAGCTGAAAA	AGATGCCTCGTCTTTCTTGG	GGAGCAAAACCAGCTGAAAAGAGTAAGAAAGAAGAGAAGGAAGACAGCACAACAAAGTCAAAGAAAGAGAAAGCAGACTCACCTGCAAATAATCAAAAAGAACAACAAATTGGAGTCAAGAAAAAGACTTCTGAACCAGAAGATGCATCGAACTCACACAAATCGGTGACGGCCAAAAAGGATTCCAAGAAAGACGAGGCATCT
HD3A1002	D12	HD3100690	probe	FBgn0261109	marionette	mrn	224	TATCACGGCAGAGCAGATTG	ACTGGGCGTAGTCTCGTAGC	TATCACGGCAGAGCAGATTGTCTCGTATCTGGAGCAGTATGCGCATCCCAATATGCGCATGGTCGAGTCAGCCATTCACTCTAAATCCTGCCTGCCACCCACAGTCGTTGATCAAATTAAGCTGTGGGAATTAGAGCGAAATCGCTTCACCTACACCGAAGGCGTGCTGTACAATCAGTTCCTCTCGCATACAGATTTCGTAACGCTACGAGACTACGCCCAGT
HD3A1002	D13	HD3100595	probe	FBgn0038805	mitochondrial transcription factor A	TFAM	218	CGTTTGGGAGGAGAAGATGA	GCCCTAACCTTAACAATTGGC	CGTTTGGGAGGAGAAGATGATCCGCCTGGGCCACATCGACGTGGTGCGTCACGGAAATCTTATCGATCCACCTGAGCCAAAGCCCCGCAAGACGCTGGCCTCCAAAGATATATAGTTGTAGCTGCTCGGCCCGCCCTCTTCCATCACATAATTCACAAATCATGCATCATTCTGTTTTTCGTTTTTCTTTTTCGATCGCCAATTGTTAAGGTTAGGGC
HD3A1002	D14	HD3100691	probe	FBgn0028406	DNA fragmentation factor-related protein 4	Drep-4	201	GAGTCATCCGCAGACCAAGT	AGCTCTTGCACAATGCGATA	GAGTCATCCGCAGACCAAGTGTTCAATTCATAAGAAGCAAGTGGTCGATATCTCAGTACTGGAGTACTTTCTAGAAATATTCTCCCTAAAGAATCTCAAACTAGTGCACATTGTCTGTCATGAGAAGGCGCAGCGCTCAAACCGTTCGAATGGTCGCCTACTGTGCTCCGACTGTCATGAGTATCGCATTGTGCAAGAGCT
HD3A1002	D15	HD3100596	probe	FBgn0040346		CG3704	204	CCCTGGACACCTTCTACGAG	CGTCCTCTTCCACATGATCC	CCCTGGACACCTTCTACGAGAATCTAAGAACGTGCGGCGTCTCGGCCAAGACAGGCGTAGGCTTCACCCAGCTACTGACGAAGATTCTCGAAAGCGTGGACGAGTACGAGACGGACTACAAGCCTGTTTACGAAAAGAAGCGCCAAGAGCGACTGGCGGAGAGTGCGACGGGTCCAAAGCCAGTGGATCATGTGGAAGAGGACG
HD3A1002	D16	HD3100692	probe	FBgn0031309	TFB4 ortholog (S. cerevisiae)	Tfb4	205	CTCCAGAGGAATCTGGCTCC	GGAACTGTCCGGAGGTAATG	CTCCAGAGGAATCTGGCTCCTGGCGTCAAGATGCATTCCCGCATCCTGGTCGTCACAGGCAGCAACGAGTGCGCCTCGCAGTACATGACGTTCATGAACGTCTTCTTCACCGCCCAGAAACTGGGCATCACGATCGATACCTGCGCCCTGGACAAGACCCTCAGTTTGCTACAGCAAGGCTGTGACATTACCTCCGGACAGTTCC
HD3A1002	D17	HD3100597	probe	FBgn0036194		CG11652	216	CTCGGAAGACAAGGCAGTTC	CAGCTCGTAAGGATTCAGCA	CTCGGAAGACAAGGCAGTTCAAGAGTGCATCGGTTTTTGGAGAAGCGACTTCATGCCAAGGGTATTGAAACTACCACATTATTGCTGTCGGAGATCTTCCCACAGAAATTGGCTCTTTTCGCCGACATCGACGCCTTTGTGCAGATTGCTTGTCCGCGACTTTCAATCGACTGGGGATCCGCATTTAGCCAACCGTTGCTGAATCCTTACGAGCTG
HD3A1002	D18	HD3100693	probe	FBgn0010421	Transcription factor TFIIFbeta	TfIIFbeta	214	GCCGTGATGGATATGCTCTT	TGTGCTCCTCCTCTTTCTTCTC	GCCGTGATGGATATGCTCTTCCACGCATTCGAGAAGCATCAATACTATAACATCAAGGATCTGGTCAAGATCACCAACCAGCCGATTAGCTACCTGAAGGAGATTCTCAAGGATGTCTGCGATTACAATATGAAGAACCCGCACAAGAACATGTGGGAGCTCAAGAAAGAATATCGCCACTACAAGACTGAAGAGAAGAAAGAGGAGGAGCACA
HD3A1002	D19	HD3100598	probe	FBgn0265630	strawberry notch	sno	87	CCGATGACGACAATGACAAT	CGGGCACTTCTATTTGATCTG	CCGATGACGACAATGACAATTTTGATGAAGACGATTCGGGCTCCGATTTCGACGATGACGAGGATCCAGATCAAATAGAAGTGCCCG
HD3A1002	D20	HD3100694	probe	FBgn0029783	Sirt4	Sirt4	222	CAGTCTCCTGGTCTTCTCCG	CAAATTTAGTGGGGGTCAACA	CAGTCTCCTGGTCTTCTCCGGCTACCGCGTTGTCCTGCAGACCAAGGACCTCAAGCTACCGGTGGGCATTGTTAATATTGGCGAAACGCGCGCCGATCACCTGGCGGATATCAAGATATCCGCCAAGTGCGGCGATGTCATACCCAAACTGTTCGACTTTCGCAATTCGAAAAGCGTCAGTTAATACTCACAGTTGTTATATGTTGACCCCCACTAAATTTG
HD3A1002	D21	HD3100599	probe	FBgn0031876	Ada2a-containing complex component 1	Atac1	211	CGTGGCAACCAGTGCTATAC	GAGTTGGCAAGTCCGGTAGA	CGTGGCAACCAGTGCTATACCAATTTGCTGCGCACTTTGGCCGTGCTGCAGGCACAAAGGATTCGGGTGCATCAGCAGATTGAGGAATTGGAAGCCACACAAAATATCTACTTGGAGAATCCGCAACATATGCTGGACAAACTGCGAAACAACGAGCCTTTGATAGCGGATAATTACATCACCACGACCGTTCTACCGGACTTGCCAACTC
HD3A1002	D22	HD3100695	probe	FBgn0001179	haywire	hay	212	GACCACCAAGACCTCCAAAA	GGAGGATCTGGATACGTTCG	GACCACCAAGACCTCCAAAAAGATGTTGCTCTATGTGATGAATCCCTCCAAGTTCCGCAGCTGCCAGTTTCTTATTAAATATCACGAGCAACGAGGCGACAAAACAATCGTCTTCTCAGATAATGTGTTTGCGCTAAAACACTATGCGATCAAGATGAACAAGCCTTTCATCTATGGTCCCACCTCGCAGAACGAACGTATCCAGATCCTCC
HD3A1002	D23	HD3100600	probe	FBgn0002643	mastermind	mam	206	CGGCTTTCCCGATCTACTC	CCTCGGACTTCACATTCAGG	CGGCTTTCCCGATCTACTCGGGGATGATAACTCGGAGAACAACGACACGTTCAAGGATCTCATCAACAACCTGCAGGACTTCAATCCCAGTTTCCTCGATGGCTTCGATGAGAAACCGCTGCTGGACATAAAGACGGAGGATGGCATCAAGGTGGAGCCGCCCAATGCCCAGGATTTGATCAATAGCCTGAATGTGAAGTCCGAGG
HD3A1002	D24	HD3100696	probe	FBgn0004861	polyhomeotic proximal	ph-p	210	CACCCCAAAGCTTTCAGAAT	TCTGTTCCATTCACTTCCGA	CACCCCAAAGCTTTCAGAATCGTTTCCTATTTTGGGAGCCTCAACAGAAGTACCTCCAATGTCACTGCCAGTCCAAGCGGCGATTTCTGCGCCCTCGCCTCTTGCAATGCCTCTAGGATCGCCATTGTCAGTTGCACTTCCAACTCTTGCACCACTGTCTGTAGTCACTTCTGGCGCGGCGCCCAAGTCTTCGGAAGTGAATGGAACAGA
HD3A1002	E01	HD3100409	probe	FBgn0033926	Activity-regulated cytoskeleton associated protein 1	Arc1	205	GCCTCGAAAACGGCTCTATT	TTCCTCCATTGCGAATAACC	GCCTCGAAAACGGCTCTATTTTCATATAATTTCACGCCGACTTGCGGCTACTTTGGCACAGAACGCCAGCTTTTGGAAAGCAATAATTTTTATTGCAACATTGAACCTTTATTTGCAACTAGAAACTAGATTTCGAGAATCATCGGGCGGGGCGGCTGAGGATCTGGCATTTCGTCCGTAAGATCGGTTATTCGCAATGGAGGAA
HD3A1002	E02	HD3100505	empty
HD3A1002	E03	HD3100410	probe	FBgn0038746	Surfeit 6	Surf6	214	ACGTGTGCGTGCGTAAATAA	CTTCTTGTTTGGAGTAGGGCA	ACGTGTGCGTGCGTAAATAATAGTTTTATTGTTATTTTACTCTCGAAAATGACCCAGGCGGAGATCGTGAAATGTCTGCGGGAGGAGTATGAAATCGAACACAACAAGGATCAGAAGCCGGAGAAGGAGGACCTGCCCGCCATCACCAAAAAGTTCTATCAGCGAGTCTTGGAACTGCTGACCATTCACAAAGTGCCCTACTCCAAACAAGAAG
HD3A1002	E04	HD3100506	probe	FBgn0023097	bonus	bon	214	CGAGCGAACGTCGTGTATAA	AGGCAAAAACAACGATTTGTG	CGAGCGAACGTCGTGTATAAGTAAAACGAAAGTTGTGTCGCTCTGTGCGAAAGAGAGAGGGAGAACCCAATATTTTTGCAAGCCAGAAGTCGAAGGTGAAATTAAAATGCATTAGCCACCCAATTGAAGAGGAGTCAACTACGAACAAAACTTTAAGAATCAGCGAAAAATCGTTTGTGAACATCCATACAAGCACAAATCGTTGTTTTTGCCT
HD3A1002	E05	HD3100411	probe	FBgn0031759	little imaginal discs	lid	218	CCTGTGCTGAGCAGTTTGAA	CGCGAAGTTATAGCCTTGGT	CCTGTGCTGAGCAGTTTGAAGAGACCATGAAGCAGGCAGCTCCAGAACTTTTTTCATCACAGCCCGATCTGCTTCACCAGCTGGTGACCATTATGAACCCGAACATTTTGATGAACAATCGTGTACCGGTATTCCGAACCGATCAGCATGCAGGCGAGTTTGTGATCACCTTTCCCAGGGCCTATCACGCAGGCTTTAACCAAGGCTATAACTTCGCG
HD3A1002	E06	HD3100507	probe	FBgn0032321	YL-1	YL-1	209	TTGGTCACACTGCTCTGCTT	CCTCCTGAAATCCACCATAGG	TTGGTCACACTGCTCTGCTTGTTTACATTTACAAATTGTAAAATATTATTATTTAATAGCTGCTTTAAATCATAGTTTCTATATATAAATAACAAAAATGGCTGCCTCGCGATCACGGCGCAACAATGCCGGCAACAAAATAGCTCATTTGCTCAATGAGGAAGAGGAGGACGACTTTTACAAAACGTCCTATGGTGGATTTCAGGAGG
HD3A1002	E07	HD3100412	probe	FBgn0004907	14-3-3zeta	14-3-3zeta	81	CCATGAAGTCCGTCACAGAG	CCACATTTTTGTAGGCAACG	CCATGAAGTCCGTCACAGAGACTGGCGTTGAGCTCTCAAATGAGGAAAGAAATCTGCTCTCCGTTGCCTACAAAAATGTGG
HD3A1002	E08	HD3100508	probe	FBgn0031308		CG4749	204	GGCGGCAGTTTGGTCTACT	GTAGGGCACCACCATTTGTC	GGCGGCAGTTTGGTCTACTCCACCTGCTCGCTGTCGCCCATCCAGAACGATGGTGTCGTCCACATGGCTCTGCAAAAGGTCTTCACGGAGTACGGCATCACAACTACCATCAAGGATCTGAGTCGCCACACGGCGCTCTTCAGCGATGTCTTCAAGTTCGAGCACCCAAAGGGACTCAAGTATGGACAAATGGTGGTGCCCTAC
HD3A1002	E09	HD3100413	probe	FBgn0003744	tricornered	trc	208	GTGGGAACGCCGGACTAT	CCTCCGATATGGGGATCTCT	GTGGGAACGCCGGACTATATTGCACCCGAAGTATTTCTGCAGACTGGCTACGGACCCGCCTGCGACTGGTGGTCCCTGGGAGTCATCATGTACGAAATGCTGATGGGCTATCCTCCATTCTGCTCGGACAATCCCCAGGACACCTACCGCAAGGTGATGAACTGGCGCGAGACGCTGATATTTCCCCCAGAGATCCCCATATCGGAGG
HD3A1002	E10	HD3100509	probe	FBgn0003204	raspberry	ras	218	TAATCGGAATCGCTGACGTT	AACGCGTTGCGCTTTAGATA	TAATCGGAATCGCTGACGTTAAAGATTACGATTCCAATGTAGATTCCCCTTTTTGATGGCGGTGGAGGTTACCTCGAATCGCCCGAATACATGTGTATACTTAATCCATCTGTCTGGTAGACAGAATCCTAATTATAAGTGTTTGCAGGTTACTTGATCTGTATAGAAAGTATATAATCTTCAACTATTCGCTATATATATCTAAAGCGCAACGCGTT
HD3A1002	E11	HD3100414	probe	FBgn0031540		CG3238	208	CCAGGCTCCATCTCAGTTGT	TATATGGTTTCCTGAGGCGG	CCAGGCTCCATCTCAGTTGTACCTAAAAGTTAACGCCCAAGTAATGCTACTCAAGAATATAAACATATCCAATGGACTGGTGAACGGAGCTCGAGGCGTCGTTGTAAGAATGGAGAAGGATCTGCCAGTGGTAAGGTTCAAAAACAACCAGGAATACGTTTGCAAGCACGAAAGGTGGATAATAAAGACCGCCTCAGGAAACCATATA
HD3A1002	E12	HD3100510	probe	FBgn0013762	Cyclin-dependent kinase 5	Cdk5	225	TATAGCCATTTGAGCTGCCA	TTGGAAACCAGATGTATTGCC	TATAGCCATTTGAGCTGCCAAATTAACATTTATCGATAAAATACTTATTGATTCAGTAAAATAGTTTTATTCTTAAAAATTTTTATGTTGAGTGTATCGTTAAGATCCGAAAATTGTTCAAATTCCTAGACGATATCTACTGTTTGTGTGAATGTGGAAAAAATATTTGAAATCCTAGTTTCTGTTTTCAAAGACTAAAAACTAGGCAATACATCTGGTTTCCAA
HD3A1002	E13	HD3100415	probe	FBgn0032516		CG9293	84	CGTAAACAGACGCTGGAATTT	ATAGCCGATGACATTTTCGGT	CGTAAACAGACGCTGGAATTTAGCTTACACACTCCATATTCTTTGTTAAATCCGATATTTGACACCGAAAATGTCATCGGCTAT
HD3A1002	E14	HD3100511	probe	FBgn0032248		CG5343	201	ACTTTCCAATCGGGATTCCT	GATGCCCAGCGTCTTCTTC	ACTTTCCAATCGGGATTCCTATCAATTCTGTACAGTATTGGCTCAAAGCCACTGCAGCTGTGGGATAAGAAGGTGCGCAATGGACACATCAAGCGGATCACCGACAACGACATACAAAGCCTCGTGTTGGAAATAGTCGGCACCAATGTCAGCACCACGTTCATAACATGTCCGGCAGATCCGAAGAAGACGCTGGGCATC
HD3A1002	E15	HD3100416	probe	FBgn0036761	Mediator complex subunit 19	MED19	222	CTGAAAACGACCATTTCGCT	CGTGATGAGGTCGTTAATGC	CTGAAAACGACCATTTCGCTGGGCAAGACGCCAACGATCATTCACACGGGGCCATTTTACTCCATGAAGGAACCACCCGCCAAGGCAGAACTTACCGGCGACAAGGATCTCATGACCGAGTACGGACTGCACCACACACTCACCAAGTTCAAGGAGAAGAAGTTCAAGGAGTCGCTGGCCTCGTTTCTGCAGAACATCCCCGGCATTAACGACCTCATCACG
HD3A1002	E16	HD3100512	probe	FBgn0004606	Zn finger homeodomain 1	zfh1	205	CAACGACCCTACCAGTGCAT	AGGTGTCGCTTACCTATTCCC	CAACGACCCTACCAGTGCATAGAGTGTCCGAAGGCCTTCAAGCACAAGCACCACCTCACGGAGCACAAGCGTCTGCACAGCGGCGAGAAGCCCTTTCAGTGCTCCAAGTGCCTGAAGCGCTTCTCGCACTCGGGCAGCTACAGCCAGCACATGAACCACCGGTATTCCTATTGCAAGCCCTACAGGGAATAGGTAAGCGACACCT
HD3A1002	E17	HD3100417	control_rho1	FBgn0014020	Rho1	Rho1	156	TTTGCAGAACTTCCAATGACG	CTCGATGTCGGCCACATAAT	TTTGCAGAACTTCCAATGACGACGATTCGCAAGAAATTGGTAATTGTCGGCGACGGTGCCTGCGGTAAAACTTGCCTTCTGATTGTCTTCAGCAAAGATCAGTTCCCCGAGGTCTATGTGCCCACCGTATTCGAGAATTATGTGGCCGACATCGAG
HD3A1002	E18	HD3100513	control_rho1	FBgn0014020	Rho1	Rho1	156	TTTGCAGAACTTCCAATGACG	CTCGATGTCGGCCACATAAT	TTTGCAGAACTTCCAATGACGACGATTCGCAAGAAATTGGTAATTGTCGGCGACGGTGCCTGCGGTAAAACTTGCCTTCTGATTGTCTTCAGCAAAGATCAGTTCCCCGAGGTCTATGTGCCCACCGTATTCGAGAATTATGTGGCCGACATCGAG
HD3A1002	E19	HD3100418	probe	FBgn0038047		CG5245	211	GAAGGACGAACCACCTCAAG	CGTATCTGTTTGCTTTCGCA	GAAGGACGAACCACCTCAAGAAGACACTTTCGAAGAAGAATTAATCTTCATTTCTAACAGCGACTTCGAAGAGCTTGAAAGCGAAATAAAGATTGAGAACTTCTGTAGTTATGGCAAAGATTTGGAGCCAGTTAAAGGCGTCCCGTCGAAGCTGAAGACGTGTAAATCCAAAATAGCAAAGAAGCGCCCCTTGCGAAAGCAAACAGATACG
HD3A1002	E20	HD3100514	probe	FBgn0028897		CG4935	206	CGTCCACTCCTTAGCCACTC	ATTTTGATGAGGTGGGCTCC	CGTCCACTCCTTAGCCACTCATCCCAAGCGACAGGAAATGCTTTTCGCCAGACGACGGGACATGTATGTCTTCTCGACAGATTTGCAAATCGAAGAGGAGCAATTATAGGTACTCATAATGCTGTATAGTTTTACCAAAAGCTAGTGATATAAATAATATAGTTATAAAATATAAAGACTCCTTCAGGAGCCCACCTCATCAAAAT
HD3A1002	E21	HD3100419	probe	FBgn0036126		CG6272	203	ATTCAGGGTGAGAAAACGGA	TTCGAGCAATTGCACCATTT	ATTCAGGGTGAGAAAACGGAGGACGGCCATCGAATCATCCAGGAGATTCTCGCTGAACCAGATCCCGATCCCAAGGACAATGACTAACGAGGAGCTTCTCCTGATTTACCTTCTTATATTTTCATACTTTTAAGCCATTTCCCATGGTTGTTAACCATGTGTATCATCTTAGTTTTTCGATTAAAATGGTGCAATTGCTCGAA
HD3A1002	E22	HD3100515	probe	FBgn0012058	Cell division cycle 27 ortholog	Cdc27	212	CAGCACACAGGCCAAACTT	CTTTCTAGGGGCGCTCTATG	CAGCACACAGGCCAAACTTTTACTTTTTCCCATTCGATATTGTTGGAAAAAATTTGGCCAAAAGAAAACAATTCGAATACAAATACAAACAGAAGAGTGTACGAGTGGGGGGCGACATGATAGTTTGTTTGAGTTCTACACACTGCATGTTTGAATTATTGTAAAGCCCTGAAGTACAGTGAACGTACATCTCATAGAGCGCCCCTAGAAAG
HD3A1002	E23	HD3100420	probe	FBgn0027339	jim	jim	207	ATAACAACGCTGTCGCCC	AGCACTGCGGAAAATAGAGC	ATAACAACGCTGTCGCCCAGGTGGCCAATCACCTGATGAACGACGCCAAGAGCCTGGCGGCCCAACAGTTCCTCAACAACAACAATCCCTCGGCAGTGGACAACAAGGCCAACATCCTTCCGGTGCGCAGTATAGCATCCAACGCTGCGGCAGCCGCTGTTGTCCAGCAGTCCGTAGTAAAGAACGAGCTCTATTTTCCGCAGTGCT
HD3A1002	E24	HD3100516	probe	FBgn0004510	Ets at 97D	Ets97D	207	GGCACCGAGGGAGAATTTA	CGCATCATAGCCGATCAATA	GGCACCGAGGGAGAATTTAAGCTCACTGACCCGGATCGAGTGGCACGCCTTTGGGGCGAGAAGAAAAACAAACCCGCTATGAACTACGAAAAGCTATCAAGGGCTCTCCGCTACTATTACGATGGGGATATGATCTCCAAGGTGTCCGGCAAGCGATTCGCATACAAATTTGACTGCGATTTGAAGCTATTGATCGGCTATGATGCG
HD3A1002	F01	HD3100601	probe	FBgn0052500		CG32500	216	GTGACGCTGAAGAACGGAGT	AGCGAATTAGCAACGTAAGCA	GTGACGCTGAAGAACGGAGTGCAGAACATGCTGCAATTCTACATACCGGAGGTGGAGTCCGTTGAGCAGGTCTTCGACGAGGCGGACAGGATGATCGAGAGCGAGTTTGAGCGCTTCGAAAAGAACCTCAAGACGCTCAAGCAGCAGGAGCCCAGTGGCGGCGGTCCCCATTAGAGGGACTCATTTTAATTTCCCTGCTTACGTTGCTAATTCGCT
HD3A1002	F02	HD3100697	empty
HD3A1002	F03	HD3100602	probe	FBgn0051953		CR31953	81	TCCTGCCCAGATTTGTGGT	CAGTCTGGAAAGCAAAGAGCA	TCCTGCCCAGATTTGTGGTAGGTCTTGTGAGATTTTTGAATCAAAGTCCATTGCAACTGGTGCTCTTTGCTTTCCAGACTG
HD3A1002	F04	HD3100698	probe	FBgn0036746	CREB-regulated transcription coactivator	Crtc	209	AACGCATTCACTTGCCATTT	AAGCACGGACGATAACGAGA	AACGCATTCACTTGCCATTTCTCGATTAAATGCCATATTACTTAAGCTCAGGATTTACAAGCTTAATGCGAATTAAGTTAATTTCGGAAATGCTGACGAGAGTGATTGCAAAGTTCAAAATTGATACAAATTCACTTCCGCAAATTCATGCTGAAACTGAAAGTTTTCTAACAGTCCTCAATATTGTTATCTCGTTATCGTCCGTGCTT
HD3A1002	F05	HD3100603	probe	FBgn0037345	rev7	rev7	225	ACACTACCCAGGAGGCATTC	CCAACGTCGTGTAGTTTTCG	ACACTACCCAGGAGGCATTCATCCGCTTCAGCCATGACTCCCAGTACCAGGAGTTTCCCTGGCTTCAGACCCAAAAAACTGAATCCCAAGCGACAGGGCGAACCGTTTACCTCCTTCCTTTGGCTAGGGTAGATGATTTGGGACTGAAAATGGATGTCCTCATCGTTAATTAATGTTATATTCCTAAAACTGTTATCCATTTTATCGAAAACTACACGACGTTGG
HD3A1002	F06	HD3100699	probe	FBgn0033260	Cullin-4	Cul-4	217	GATTCGTCCGATATCCCAAA	TGCGAACTCAAGGCAAATAG	GATTCGTCCGATATCCCAAAAAGCAATATTTTCCGCATGCAACCAAAAGCGAAATAATAAAATGTTGCCTGTGTAATTGTACTTCCGAAGTTTTGTCGATTTGAATAGTCTCTCAGGCGTCGAAGGAACCCCATTTGTCCAAAAGGACGCCGTTTGTCGGAGAAATCTACTTCGCAGCCGGAAAATTCACAGGAAGTCTATTTGCCTTGAGTTCGCA
HD3A1002	F07	HD3100604	probe	FBgn0261278	grapes	grp	201	AGGAGGCTCGGCTCAGTTAC	AACCACCCAGTCTTTCGATG	AGGAGGCTCGGCTCAGTTACTCCTTCTCGCAACCAGCTTTGCTTGATGATCTCCTACTGGCTACCCAGATGAACCAAACGCAGAACGCTTCCCAGAACTATTTCCAGCGTTTGGTGAGGAGAATGACCCGATTCTTTGTGACCACACGATGGGATGACACTATCAAGCGATTGGTGGGAACCATCGAAAGACTGGGTGGTT
HD3A1002	F08	HD3100700	probe	FBgn0037026		CG3634	204	CCCTCGATCATGAGCGTACT	TCGCTTGGATGCTATGTCTG	CCCTCGATCATGAGCGTACTGAACATTCACGAGAATCTAATCGAAACGCTGCTGGAGATGCAGGCCTACGCCGATTGCCATGCCATTCTGGCCAAGTACGATGACATCTCGCTGCCGAAATCGGCGACTATCTGCTATACAGCTGCTCTGCTGAAGGCGCGCGCCGTAGCCGACAAGTTTTCGCCAGACATAGCATCCAAGCGA
HD3A1002	F09	HD3100605	probe	FBgn0023177	Protein phosphatase 19C	Pp4-19C	217	TTTCGGCTGCAGCGTATTA	ATAAACGTTTTTGCCAACCG	TTTCGGCTGCAGCGTATTATAAATACACAAAAATAAATAATTTATCGATGGAATCCTTGGTGCAGTGTAAAAGGCTTTTTAGGGTCTTCGTGGTAATGCCCACTATCGAAACTGAAGACTCGATGTGTCATTGCAAGTGCCATTACTCAATATATCGATACAAACGCAAGTAGCCAATCCAGCTCTTCGCAGAAACCCGGTTGGCAAAAACGTTTAT
HD3A1002	F10	HD3100701	probe	FBgn0039016	Dicer-1	Dcr-1	206	TGGAGTCTATCGGAGGTGCT	TCTTGCAGCTTCTCCTCTCC	TGGAGTCTATCGGAGGTGCTCAAGAAATCGCGGGAGTCCAAACAAAAGGAGTCCCTTAAGGATGATACTATTAATGGCAAAGACTTAGCTGATGTTGAAAAGAAACCGACTAGCGAGGAGACCCAACTAGATAAGGATTCAAAAGACGATAAGGTTGAGAAAAGTGCTATTGAACTAATCATTGAGGGAGAGGAGAAGCTGCAAGA
HD3A1002	F11	HD3100606	probe	FBgn0001291	Jun-related antigen	Jra	214	CCCCATGTCACTGGACTTTC	CGGTGTTTGCATCAGATTGT	CCCCATGTCACTGGACTTTCAGTCGCCGAACCTGAACACATCCACCCCGAATCCTAACAAGCGTCCCGGCTCGCTGGATCTGAACAGCAAGAGTGCCAAGAACAAGCGCATCTTCGCACCACTGGTCATCAACTCACCGGATCTGTCATCCAAGACGGTAAACACACCCGATTTGGAGAAGATCCTGCTATCCAACAATCTGATGCAAACACCG
HD3A1002	F12	HD3100702	probe	FBgn0010339	upstream of RpIII128	128up	205	GCATCCGGCTTAACAAGAAA	TTGCCCTCGATAACGTCAAT	GCATCCGGCTTAACAAGAAACCACCAAATATCTACTACAAGCGGAAGGACAAGGGTGGCATCAATCTGAACAGCATGGTTCCGCAGTCCGAGTTGGACACGGATCTGGTGAAGACCATTCTATCCGAGTACAAGATCCACAATGCGGACATCACCCTGAGATACGACGCCACTAGTGACGACCTCATTGACGTTATCGAGGGCAA
HD3A1002	F13	HD3100607	probe	FBgn0003396	schnurri	shn	205	GCGAAAGTGCAGGAACACAT	GTGCGTTGGTGTTGTTTTGA	GCGAAAGTGCAGGAACACATTTCCAAGTTGATCTCTCAAAATGAAGCCATAGTTGAAAACAAGGAGATATTGTTGCAGAAGAAGTACCCCAAACAGCTTAGTCGTTCCCGCAGTTTCAACAATGCCAACAGCAATAATGCTTCGCAGCACGGGAGCAACGCGTCGGCATTGCATGCAAACAATAGTCAAAACAACACCAACGCAC
HD3A1002	F14	HD3100703	probe	FBgn0031091	PHD finger protein 7 ortholog	Phf7	201	CGTGCGTTCGATACCAAAGT	GGATGTGGATGTGGATGATG	CGTGCGTTCGATACCAAAGTGCAGAGTCGCGTGGTGACCCTCTCCGATGATCAACCATCTACTTCTGCGGGGGCACGCGCTTTAGCCGATCGTGGAACTCGCACATTTGAATCACAGGGAACGCAAACAACATTTCTCTCAAGTGTAGTAACCTCGTTTCGCTCTGCTACTGCAACTGCGACATCATCCACATCCACATCC
HD3A1002	F15	HD3100608	probe	FBgn0026869	Thd1	Thd1	206	GGGCGGTATGGGATTTTAGT	ACTGGCGTTGTCATTTGTGA	GGGCGGTATGGGATTTTAGTATCAAATGATACTCCCGAATGTCTAAGCAGAGAAATGTATCGACACAGTCAACAAAGTACAACTGTATTGGAACAAACTGATAGCTCTTCGTGCGGCATAAATTTCAAGCCAATGCCAAAAAAAAGAGGCCGCAAAAAGAAGCTAGTAGCTGTTAATGCTGATACCTCACAAATGACAACGCCAGT
HD3A1002	F16	HD3100704	probe	FBgn0035689		CG7376	214	CAACGATGGTGAACCACAAG	TGCTGCATAACTCCTTTCAGG	CAACGATGGTGAACCACAAGACCTCTCTTCATGATGCTATTTGGAACAAAGTCCGGGATGACTTCTTTCGCCAAAACATTTCTGTGGAAAGGCTAGAAAATGTCAACTCCATGGCCGGAATGCTTTACTTTATGGATATATGGCATAATAAGCTACAAAATCTTAAGAGTACTTTGATCGCTGAGTTTGAATTCCTGAAAGGAGTTATGCAGCA
HD3A1002	F17	HD3100609	control_rho1	FBgn0014020	Rho1	Rho1	156	TTTGCAGAACTTCCAATGACG	CTCGATGTCGGCCACATAAT	TTTGCAGAACTTCCAATGACGACGATTCGCAAGAAATTGGTAATTGTCGGCGACGGTGCCTGCGGTAAAACTTGCCTTCTGATTGTCTTCAGCAAAGATCAGTTCCCCGAGGTCTATGTGCCCACCGTATTCGAGAATTATGTGGCCGACATCGAG
HD3A1002	F18	HD3100705	control_rho1	FBgn0014020	Rho1	Rho1	156	TTTGCAGAACTTCCAATGACG	CTCGATGTCGGCCACATAAT	TTTGCAGAACTTCCAATGACGACGATTCGCAAGAAATTGGTAATTGTCGGCGACGGTGCCTGCGGTAAAACTTGCCTTCTGATTGTCTTCAGCAAAGATCAGTTCCCCGAGGTCTATGTGCCCACCGTATTCGAGAATTATGTGGCCGACATCGAG
HD3A1002	F19	HD3100610	probe	FBgn0035690		CG10274	202	GCCGATCTGATGACCATCTT	AGCCTGTTGGGAACTCTTGG	GCCGATCTGATGACCATCTTTGCCGCGGAATCCTCGGAGGAGAGCGAAGAAGATATTGACCAAGATGTGGACTTTGAGCCCAACAGTAGCGATGGTGACGATGATGTGCCTTTGGCCCAGCGCTTACGGGATAATTCGCGGATGATACCAAAAGCAAAGGCAGCCGTAATTAAGGAAGAGGACCAAGAGTTCCCAACAGGCT
HD3A1002	F20	HD3100706	probe	FBgn0086613	Ino80	Ino80	225	CAACGAGTGGTTCTCCAAGG	ATGCGGATCTTTTGCTTCAG	CAACGAGTGGTTCTCCAAGGATATTGAATCGCATGCGGAGAACAAAACTGGTATTGATGAAAAACAAATTTCCAGACTCCATATGATCTTGAAACCCTTCATGTTGAGGCGGATAAAGAAGGATGTGGAGAACGAGCTGTCGGATAAAATTGAGATTATGGTCTATTGTCCGCTGACCATACGTCAAAAGTTACTATACAGGGCGCTGAAGCAAAAGATCCGCAT
HD3A1002	F21	HD3100611	probe	FBgn0011300	baboon	babo	202	CTGACCAGCTGGGAGTTTGT	AACCAGAGGTGGTCATCTCAA	CTGACCAGCTGGGAGTTTGTGGCTATCATCCTAGGGGCCACCCTCTTCATTTGCTTCACGGGCACCAGTACGTGGTATTATTGCCAGCGTCGCAAGCGAATGGCTAGCGGAAGGACGTTTGCCAAGGAGGATTCGGCGTACGATCCTATTTTGAATGGTAATACAACCATACACGACATCATTGAGATGACCACCTCTGGTT
HD3A1002	F22	HD3100707	probe	FBgn0052451	Secretory Pathway Calcium atpase	SPoCk	206	AAGACCAAACGGGACACAAC	TCCGTCTGGAAAACCATTTG	AAGACCAAACGGGACACAACGATGACCTTTACTTGTTTCGTGTTTTTCGACATGTTTAACGCCCTGTCTTGCCGCTCGCAGACAAAGAGTGTCTTTACCATCGGACTCACTACCAATCGAATGTTCTTGCTGGCCGTCGCTTTTTCGATCATTGGTCAAATGCTCGTTGTCTACTTTCCGCCGCTGCAAATGGTTTTCCAGACGGA
HD3A1002	F23	HD3100612	probe	FBgn0032171		CG5846	201	GACGGAGACACGGCCTACT	GAGGTATCGTGGGTTTCCAA	GACGGAGACACGGCCTACTCGCTGGCCGTAGAGCATGGGGCTCATCTGGCGCAGGCGCTACTGGAGCAGTACATGACGGCCATAATCACAGCGGGAGCCTTCGGTAGTATTTAATTGTGCGTAGATAATAATTAGGATATTCTTAATCATTTTTAAATTTTGTTTTTGTCAATAATAGATGTTGGAAACCCACGATACCTC
HD3A1002	F24	HD3100708	probe	FBgn0011725	twin	twin	222	GCTATGCTGGGAGTACCGAA	CTGAAGAATATCGCACAGCC	GCTATGCTGGGAGTACCGAAAAAAGTCGATTATCGACGAGATACGGCACTATGCAGCGGACATTATCAGTCTGCAGGAGATCGAAACGGAGCAATTCTATCACTTCTTCCTGCCGGAACTCAAGAACGATGGGTACGAGGGAATCTTCTCACCGAAGTCGCGTGCTAAGACTATGTCCGAGCTGGAGAGGAAGTACGTCGATGGCTGTGCGATATTCTTCAG
HD3A1002	G01	HD3100421	probe	FBgn0032515	loquacious	loqs	215	CCGATTCCTTTGATTAGGCA	TTTTTCCTTCGCAAACTAGCA	CCGATTCCTTTGATTAGGCAGTTGTATTTGTTAACTGCATATGTAAATGTTCATATATGTACTACACTTACCGATGAATGTATGTACGCTTGCAAATACAGACAAGCGTGTAATCGATATTGGAATCTTCTAGTCGCTTTCAAATTCTGAAAAACGTAAAACGGCAGATAAAACTAGGTTTAAGGTAGACTACGTGCTAGTTTGCGAAGGAAAAA
HD3A1002	G02	HD3100517	empty
HD3A1002	G03	HD3100422	probe	FBgn0004924	Topoisomerase 1	Top1	220	CTGCACCAAGGAAGTGTTCA	GCAGAATCCGAATTCCTTCA	CTGCACCAAGGAAGTGTTCAATAACAACTTCTTCAAGGACTTCCGCAAGTCCATGACGCCCAGAGAGAGGGAGATTATCAAGGATTTCCGCAAGTGCAACTTCCAGGAGATGTTCAACTACTTCCAAGCGGAGTCCGAAAAGCGCAAGGCAGCCAGCAAGGAGGAGAAGCTGATCAAGAAGAACGAAAACGAGGCGCTGATGAAGGAATTCGGATTCTGC
HD3A1002	G04	HD3100518	probe	FBgn0034310	Nucleoporin 75kD	Nup75	217	TGCCAGGATACCTGCTCTTT	ATCAAATGCGTTGAGAACCA	TGCCAGGATACCTGCTCTTTACCAAGCCCACCTGCAAACCCTTTGAGCTGAAAATAGCGGCAGCCAAATGGCTAAACCGATGGTGTCTTCTCCGGCCGGAAAGAGAGCAGTGCAGCATGAACCGCATGGTTTCTCAGCTTATGGATCACGATCTTAGACTATTTATATACGATGCTCAAAAACTTAACGACACACACTGGTTCTCAACGCATTTGAT
HD3A1002	G05	HD3100423	probe	FBgn0015828	Transcription factor IIEalpha	TfIIEalpha	211	CACCGACAAGTTCATCCAGA	CGTGAATGTTTTGGAACACG	CACCGACAAGTTCATCCAGATCAGGCTTAAAATGGAAACGGGGCCGGATGGTAAGGCGCAGAAGGTCAATTACTACTTCATCAACTACAAGACCTTCGTGAACGTGGTGAAGTACAAGCTGGATCTCATGCGCAAGCGTATGGAGACGGAGGAGCGTGATGCCACCAGTAGAGCAAGTTTTAAGTGCTCTTCGTGTTCCAAAACATTCACG
HD3A1002	G06	HD3100519	probe	FBgn0263987	spoonbill	spoon	203	CAGAGCAATGGACGCACTT	ACCGTCTTTTGGGTAGCCTT	CAGAGCAATGGACGCACTTCAAATGGCAAGCATCAGCAGCAGATCGATTCCGAAATACTGAAGTCAAAGATACAGGATGCCGAACACAAGACACTCTGCTCCATAGACGAGGATTTCGAGAATCTATCGTCGCCACGTGATTTACCCGATTCGGTAAATACACGCGTATCCTTCTACAATCGTAAGGCTACCCAAAAGACGGT
HD3A1002	G07	HD3100424	probe	FBgn0024909	TBP-associated factor 7	Taf7	202	GAATGCAGGAAACGCTTGAT	ACAACAGAAACTGGCGTTGA	GAATGCAGGAAACGCTTGATAATCTCTACACACAGGTTATTGAAAGGGAATTGGAGCTGAAGGACTTCGAGAATATGCTGGAGTCTTAAGATACAGATATAATACAAATGGTGGACTAGCATAAGTTATAATAAAAACTATGTACATACATATTCGGATGTTACTTCAAACTATTTACGACTTCAACGCCAGTTTCTGTTGT
HD3A1002	G08	HD3100520	probe	FBgn0015615	Chromosome-associated protein	Cap	210	AGTCAGAATACGAGGGCACG	TGCAGATTAGCGTTTTTCCA	AGTCAGAATACGAGGGCACGCAAATCCTCAAGGAGATGAATAAGCTGAAATTACCGGGCGAGGTGACCTTTATGCCCCTGAATCGACTTCAGGTTAAAATACACGATTATCCGGATGATCCCGACTCCATACCTATGATCTCCAAACTGAAGTACGATGAACAGCACGACAAGGCGCTGAGGTATATCTTTGGAAAAACGCTAATCTGCA
HD3A1002	G09	HD3100425	probe	FBgn0037466		CG1965	211	GGACAAACATCGCTCACATC	CTTTCGAAGGTTTGGGTTGT	GGACAAACATCGCTCACATCAATCCTAACAATCAAATACTCGTTATAAAGAAATGCACAACTTATATCGGTCTGTTAGAAAATATTGTATATAAGTAGCTTCGTAAGAGATTTATTTAATTCAAGCTTGAGCTTAACAAACTAAATGGAGAACAGCCCTTCCAAACTAATCAATTTTAAATCGTTTTTCCAACAACCCAAACCTTCGAAAG
HD3A1002	G10	HD3100521	probe	FBgn0033352		CG8232	201	GATCGGGAACGCAGTAAGAT	AGATCGCTTCAAAATGGTGC	GATCGGGAACGCAGTAAGATCAACGCAGAAACTGACATCAGTAAGATCTTTGGGACCAAGCAAATCTGTATAAACCGCTGCATCAAATGCCAAGAAGAGAAGATAAAGGAAAGCATTCTACTTGCCTGCAATTTGTCGTATCCCAACCACATCAAAGATAGTGATCAGTATTTCAACTTTGGCACCATTTTGAAGCGATCT
HD3A1002	G11	HD3100426	probe	FBgn0000250	cactus	cact	208	GCTAACCCCTCGTCCTCACT	CCGACTCCTGCTGATCCTTA	GCTAACCCCTCGTCCTCACTAGCCACTAGCGGTAAAATTGGCGGCAAAACACAAGATCAAACGGCCGCCATTAACAAGCAAAAGGAATTTGCCGTGCCAAACGAAACCAGTGATTCGGGCTTCATCTCCGGCCCGCAATCCTCGCAGATCTTCAGCGAGGAGATAGTCCCCGATAGCGAGGAACAGGATAAGGATCAGCAGGAGTCGG
HD3A1002	G12	HD3100522	probe	FBgn0002924	non-claret disjunctional	ncd	207	GGTGGATCTGCTCTTCGACT	TTTGGATCCAGAACCGTCTC	GGTGGATCTGCTCTTCGACTCCATCCGGGGATATCGCAACTTGGGCTGGGAGTACGAGATCAAGGCCACCTTTCTGGAGATCTACAACGAGGTGCTCTACGATCTGCTGAGCAACGAGCAGAAGGACATGGAGATTCGAATGGCCAAGAACAACAAGAACGACATCTACGTGTCCAACATAACGGAGGAGACGGTTCTGGATCCAAA
HD3A1002	G13	HD3100427	probe	FBgn0002932	neuralized	neur	205	CTGCAATTCCACTCCGTACA	TTACAGGATCGTTGCTGGTG	CTGCAATTCCACTCCGTACATGGCGACAACATCCGAATTTCAAGGGACGGAACCCTGGCCCGTCGCTTTGAGAGCTTCTGCAGGGCCATCACCTTTTCAGCGCGTCCGGTTCGCATCAACGAGAGGATCTGCGTGAAGTTTGCTGAGATCTCGAACAACTGGAACGGTGGAATTCGCTTTGGATTCACCAGCAACGATCCTGTAA
HD3A1002	G14	HD3100523	probe	FBgn0005596	yemanuclein alpha	yemalpha	218	GGTGGAGCGGAGAGAATGTA	AAGTGGAAACTTTTTGGGGG	GGTGGAGCGGAGAGAATGTAGCGTTGAGGATTTTAACAAGAAACAATTTAAGAATCGCGCTCCTGGCCGTGCGAAAAGCGCCTGGTCGAATCGTTTAAATGTCCCCTTTGGTAGCGTCGATTGCGTGTGTTTAATCCCCGGTGCGCTGCTTTTACAGACTGTGTTGTTTTCGTGCCGGCAAGCCAACCAATTTGAAACCCCCCAAAAAGTTTCCACTT
HD3A1002	G15	HD3100428	probe	FBgn0003321	small bristles	sbr	215	GATGGTCGAAAAGCATGGAT	TGAATTTACGGCTAAGCGTG	GATGGTCGAAAAGCATGGATCGCGCCAATAATTCTATATTCCCCGCTTTCCCAGATCCTCGACTCGCCTTACATTTTGTATACAAATACCATAGAATAAAAAGAAACATTTTGACCACTGTAAAAATTTTGTAACGACTCGGAAACCAAAATTACCTTTATTTCTTAATAGAAAAAAATTATTCGATTTACAATACACGCTTAGCCGTAAATTCA
HD3A1002	G16	HD3100524	probe	FBgn0037734	trabid	trbd	201	TTTAAATGGGTGGCGAACAC	ATTGGCCCTTTGTTCAACTG	TTTAAATGGGTGGCGAACACACAACATAATTATGCAGCGGGTGAAAATGAAAGCGTCATTGAAATGTTTATTGATAGTTTTTAAAACACTTTTTGGAATTATTATGAATCATTATACATTCATGCCTATAAATATAATATCTATAATTATATAACATATATAGAAATCCTATGGTTCTAGACAGTTGAACAAAGGGCCAAT
HD3A1002	G17	HD3100429	probe	FBgn0035900	ZC3H3	ZC3H3	210	GCCTGACCAGAGTTTCAACC	TCACCAACGATTTGTTGAGC	GCCTGACCAGAGTTTCAACCTCATCAACTGGTGCTACCCAGAGTAGCGTAAATCGTAGCATCCTGAGGCGCATCGATATCGGCGGCCTTACCTACGTTGCTTCGCCAAAGGCACTGAATGTCTTTGTACGCACCAGTAATCACGTGTCGCGAGCCCATTTAATCACCGCCAAACAGAGAAGCCTGACGTTGCTCAACAAATCGTTGGTGA
HD3A1002	G18	HD3100525	probe	FBgn0036534	Decapping protein 2	Dcp2	213	GGGAGCAGGTGAAGTTGTCA	TCCAAATAGAACCAATGGGC	GGGAGCAGGTGAAGTTGTCACATCAGCAGCATTAACACCAAGAGCAAGCACCACGAAGGCGTCCAGCAATAAATTGCCAGAGAAATCGAAAATTCCGTCCGATATACTTGATGATCTGGCCAGTCGATTTATAATCAATGTTCCGGACATGGAGCTAAACAATCTAATACGTATGTGTTTCCAAATCGAACTGGCCCATTGGTTCTATTTGGA
HD3A1002	G19	HD3100430	probe	FBgn0001222	Heat shock factor	Hsf	203	GGTCACGCTGCGAACAGA	AATTTTGCAGCTCACAAACC	GGTCACGCTGCGAACAGAAGCAATTTTACTTGACGGAGGTTTCATTAAATTTTCACTTGTGAATAAAACGCGAAAAAGCACTTAAAAACCGAAGAACTGTGTAAAACAAAAGCGGTACGCCAAGAAAGTGAAGTGTAATAACTAAACTAAACAAGTAAAACGCGAGTTTTTCACTTCGCGAAAGGTTTGTGAGCTGCAAAATT
HD3A1002	G20	HD3100526	probe	FBgn0002542	lodestar	lds	211	AAGGCCTCCAAGAATCTGCT	CGTTTAATGATAAGGTCGCCA	AAGGCCTCCAAGAATCTGCTGAAACGCAGCAACCCGGTATTTAATCTGCATCGTCCCTCTTCAAAAATTAACATGGTGATACAAATCCTTAAGACATCGATTCTGAAGAGCTCGGACGACAAGGCCATAGTAGTATCTCAGTGGACGTCAGTGTTAGACATTCTTCGCGACCATTTGAGTAAGGATGGTGTGGCGACCTTATCATTAAACG
HD3A1002	G21	HD3100431	control_pvr	FBgn0032006	PDGF- and VEGF-receptor related	Pvr	175	AGGTATCCATCTGACGGTCG	AAGTACGCCAATGTCGGTTT	AGGTATCCATCTGACGGTCGTAGCTGTAGGTGGCTGTTCCGGATCCGGTTCGTCCGGCTCGGGTGCCCGATCGGGGATCATTGTCCGAATTTCTGCGATGAGTTGGCGGTTGCGTGTTATTGTTGTGCGGCTCATTAATGTAAGAGTGGATCGGGAAACCGACATTGGCGTACTT
HD3A1002	G22	HD3100527	control_pvr	FBgn0032006	PDGF- and VEGF-receptor related	Pvr	175	AGGTATCCATCTGACGGTCG	AAGTACGCCAATGTCGGTTT	AGGTATCCATCTGACGGTCGTAGCTGTAGGTGGCTGTTCCGGATCCGGTTCGTCCGGCTCGGGTGCCCGATCGGGGATCATTGTCCGAATTTCTGCGATGAGTTGGCGGTTGCGTGTTATTGTTGTGCGGCTCATTAATGTAAGAGTGGATCGGGAAACCGACATTGGCGTACTT
HD3A1002	G23	HD3100432	probe	FBgn0003330	Sex combs extra	Sce	203	ACAACCAAAGTGCGGTCAC	GATTTCCGTGCTGTCCGT	ACAACCAAAGTGCGGTCACACTTCAAGCTAATTTGGAAAATCTTAGCGAAAATTTCGTAAAAAGTGGTGTTTGTGTATTGAAAAGCCTCAGAATTGGTGTGAAAATGACGTCGCTGGACCCGGCGCCAAACAAAACGTGGGAGCTGTCGCTGTACGAGCTGCAGCGCAAGCCGCAGGAGGTGATCACGGACAGCACGGAAATC
HD3A1002	G24	HD3100528	probe	FBgn0034495		CG11788	205	CGCGTGATGGAGTACGAATA	CCTGGTACTCAAACTTGCCC	CGCGTGATGGAGTACGAATACGAGTATCGCATTATTAACATGATGCTGGGTTTGATAAGCGAAAACTCCTGGGCCTTGGACGAAGTGGAACGGGAGGAGACCATCAATGCACTGAAGGGCATAGCTCCAGAGGATGTTGTGGCTGGGCTGTTTGATATCTATACCATTCCCAGTGAACGTTGCCCGGGCAAGTTTGAGTACCAGG
HD3A1002	H01	HD3100613	probe	FBgn0015282	Regulatory particle triple-A ATPase 2	Rpt2	210	CAACCTGGAGGAGATCATCG	GGAGCCTTTTCCAGTTTCATC	CAACCTGGAGGAGATCATCGACGACAACCACGCCATCGTGTCCACATCGGTGGGCTCCGAGCACTATGTTAGCATCCTGTCCTTCGTGGACAAGGATCAGCTGGAACCAGGCTGCTCCGTGCTGCTCAACCACAAAGTACACGCTGTAGTCGGAGTTCTCAGCGACGACACCGATCCAATGGTCACGGTGATGAAACTGGAAAAGGCTCC
HD3A1002	H02	HD3100709	empty
HD3A1002	H03	HD3100614	probe	FBgn0086904	Nascent polypeptide associated complex protein alpha subunit	Nacalpha	203	TGGATGAGAAGGATATCGAGC	TGCACAACATTTGGGTCAGT	TGGATGAGAAGGATATCGAGCTGGTCATCACGCAGGCCAACACGACGAGGGCCAAGGCGATCAAGGCTCTGAAGAACAACAACAATGACATCGTCAACGCCATCATGGAGCTTACTATGCTTTAGAGCGGGCTTCAGCGTTAGCTGCACTCCTGATTTTGTTGTTTACCCGCCTTTCGATAATACTGACCCAAATGTTGTGCA
HD3A1002	H04	HD3100710	probe	FBgn0038106		CG7488	219	CGTATAGCAACCTGCCCAGT	TCAAGGCGGAAACAAGAAAC	CGTATAGCAACCTGCCCAGTTTCCTGGTGCTGAATAAGATAGACGCCCTGAAGTCGAAGCGTTTGCTGTTGGATCTGATCAAGACACTCACCAACGACACCTTGACAGTTGGCAAGCGGGAAGTCCAGGCAAAAAGTGCTCTCGCCAAGGAAATAAGAATCAACAAGCGGGAGTCTAGCTGGAGCCATTTTAGCGACGTGTTTCTTGTTTCCGCCTTGA
HD3A1002	H05	HD3100615	probe	FBgn0040068	Vav ortholog (H. sapiens)	Vav	212	GCCCAGGTGTTTCTCGACTT	TGGTACTTGAGAATGCGCTG	GCCCAGGTGTTTCTCGACTTCCGCGAACCCTTCCTCATCTACGGCGAGTTCTGCTCCCTCCTGCTGGGCGCCATTGACTATTTGGCGGATGTGTGCAAGAAGAACCAGATCATCGATCAGCTGGTGCAGAAGTGCGAGCGGGACTACAATGTGGGCAAACTGCAGCTACGTGACATACTCTCAGTGCCCATGCAGCGCATTCTCAAGTACCA
HD3A1002	H06	HD3100711	probe	FBgn0010355	TBP-associated factor 1	Taf1	217	GATGCTGGGTATGGAGAAAAG	GCTTGTTTGGCACTCGAAC	GATGCTGGGTATGGAGAAAAGTTTTTGTTCGCACCTCAGGAAGATGACGACGAGGAGGCGCAGCTGAAGCTTGACGACGAAGTAAAGGTGGCTCCTTGGAACACGACTCGCGCATATATCCAAGCCATGCGGGGAAAGTGTTTACTCCAGTTGAGTGGTCCAGCCGATCCAACGGGATGTGGAGAGGGATTTTCATATGTTCGAGTGCCAAACAAGC
HD3A1002	H07	HD3100616	probe	FBgn0030506	Ligase4	Lig4	219	GGAGGATCAGCTTCTGGATG	GAATGATTGTGCAGCCAGTG	GGAGGATCAGCTTCTGGATGGGAAAAAGAATCTGAACATGTTCCGCAACCTTAATGCGTTCTTCTACAGTCCGCATGGTGATGAAGTGGCTAAGCTTCTGTTTCTTCAAAACGGCGGCCGGATAGTCGACGATTCCGATCCGCAACTAAATCTGGGATTTATCTGTATGTCTTCTGACATCGATAACGACCACTTCGAGCACTGGCTGCACAATCATTC
HD3A1002	H08	HD3100712	probe	FBgn0036341	Syntaxin 13	Syx13	204	GGAGATCGCCAGCAGAAG	GAGATGGGCCTGCTCCAA	GGAGATCGCCAGCAGAAGCTGCAGCTGGAGAAGCTCACCCGGGAGTTCCATGGCGTGGTGGAGAAGTACTCCAATCTGCAGCGACGCATCTCATCGGCCATGCGGCAGACCCTGCAGCAGGCGCAGCAATTTGCCGATCAGGTGGTGGAGACCAACGCCCGTGCTGAGCTGCTGCAGCAACAGCGCTTGGAGCAGGCCCATCTC
HD3A1002	H09	HD3100617	probe	FBgn0001297	kayak	kay	225	AGGACACACTGGGCCACTT	CGTTCATCTGCGTATCGTTG	AGGACACACTGGGCCACTTGCTCTCGGACACGCAGACCGATCGTGTGGCTGGTTGCGCGGGATTTGCAGTGCCAAAGGTGCTACCCAATGCCATTGATGTCCTGGGCATGGGTATTCCCACCGGTGTTTCGTCGCTCCCACTTCAGCAGACATTCGATTTGAGCCTGGGGCAGGGCAGCGAGTCCGAGGACTCCAACGCTTCGTACAACGATACGCAGATGAACG
HD3A1002	H10	HD3100713	probe	FBgn0265003	klaroid	koi	221	GACTGCCGAGGAATACGAAA	TTTGCAGCTCCAGTTTCAGTT	GACTGCCGAGGAATACGAAAATATCTTAAACCATGTAAACAGCTACGTGCAGCAGTTGGTCGAGCTGAAAATGCAGCAGCATTCCAAGGAGCTCGCACCGCAACAGATTGAACTCTTTGTTAAGCTGATGAAGGAAAACCTCAAGCAGATTATGTACAAAACGGAGCTAAGCGAAAAGGATTTGTCTGATCTGGCCATAAAACTGAAACTGGAGCTGCAAA
HD3A1002	H11	HD3100618	probe	FBgn0029672		CG2875	203	CACGCGGCATAAATTCATCT	GAATCCCTTGAGCGTTTTGA	CACGCGGCATAAATTCATCTTATTTTTGTTTGTTGCGCATAATTAATATGTTTTAGCGTACATTTGCCAAACCGAAAATGAAACCCTTAACTGTGAAAGTGAACGATGACACCGGCAAGTCTTTGGCTAAGAAGAAGCTGCAGTCCAAGGCCAATTCCCTGCTAAATGCCGAGCAAGTGGACATCAAAACGCTCAAGGGATTC
HD3A1002	H12	HD3100714	probe	FBgn0027287	Golgi microtubule-associated protein	Gmap	218	CAGGATCAGCACAAACTCCA	GCTTCCTTGACGGTTAGCCT	CAGGATCAGCACAAACTCCAGTTGGCCAATCTCCAAAATCAGTTGCAAGCCGATCAGGAGAAGCTAAGAGAACTGCTCCAGCTGCAGGACAAACTGGAGCAGCAAAAGGAGCTCATGGAAGTCGACCAGAATCAACAGATTACCATAATCAAAAAGGAGCTGGCCGAGACGACCAATCAATTGAGTGAGTGCCAGGAGAGGCTAACCGTCAAGGAAGC
HD3A1002	H13	HD3100619	probe	FBgn0035295	Centrobin	Cnb	207	CGGTAGTGTTAATTACAACAGATATGC	ATGGTGATGCACAGGGTTG	CGGTAGTGTTAATTACAACAGATATGCCAAAAGGCAAAATAAGACTAACAACGTATATTATTTTTAAAATTATATAGTGCCTTGTGAAGACTAGAATATCGAGCTTTAGTTTTTGTTTTGACACACTGAATAGTGATATACCGATAGTCCATTGTTTTCGATAATCCTGCATTGCCACGTGCACCTGGCAACCCTGTGCATCACCAT
HD3A1002	H14	HD3100715	probe	FBgn0036239	Pop2	Pop2	201	CTGCTGATGAGCTCTGGCAT	CAGGTTCTTGCACGACTTCA	CTGCTGATGAGCTCTGGCATCGTGCTGGTGGAAAACATCAAGTGGCTGTGCTTCCACTCCGGCTACGATTTTGGCTACCTTCTAAAGCTGCTCACCGATCAGAACCTGCCCCCGGACGAATCTGAATTTTTCGATCTGCTGCACATCTACTTTCCCAACATCTTCGACATCAAGTATCTGATGAAGTCGTGCAAGAACCTG
HD3A1002	H15	HD3100620	probe	FBgn0026433	Grip128	Grip128	214	GATGGAACTGCGTCACATCA	CAGCTGGCTAAAATGTTCCC	GATGGAACTGCGTCACATCATCGATACTCATACGTTGCATTTTCATGGCGTAAAGACAACATACACCGTGGAGTTCTTTGCATACGGCCTGAGAGATCTTGTCCAGCCCATTTGCCAGCTCCTCATCGCTTACGAGGATCGTGTCAATAAGGATCCAGCGAAAAATACACTGATCCGTTTTACGATTGAGTTCAGGGAACATTTTAGCCAGCTG
HD3A1002	H16	HD3100716	probe	FBgn0003302	roughex	rux	208	AGGAAACGACAACAGGCAAC	GGGTGCAATCAGTCTTGTTC	AGGAAACGACAACAGGCAACCAATGGCAACGAAGTAGTGCGTAAACGTGCGACGGGACCAAGGCGGATGCGTTTCTAGACCGGACAGATATTTAAACAGCTATAGTCCCTAGTTGCTTTTCCAAATTTACGTAGCACAATTATTTTCTTTGGCTTTCGAGGATACCCGACAAATTTCCGTAATTATTTGAACAAGACTGATTGCACCC
HD3A1002	H17	HD3100621	probe	FBgn0261850	Xeroderma pigmentosum D ortholog (H. sapiens)	Xpd	210	CCCATGCTCACATTGTGGT	CCAGTTTAGTTAGATGGTTCAAAGC	CCCATGCTCACATTGTGGTATACAGTTACCACTATCTATTAGATCCGAAAATTGCCCAGGTGGTATCTAAGGAAATGAGCCGCGAGTCCTGTGTGGTCTTTGATGAGGCGCACAACATCGACAACGTTTGCATCGATTCGATGAGTGTGAAGATCAACAGACGCACCGTGGAGCGAAGCACGAATGCTTTGAACCATCTAACTAAACTGG
HD3A1002	H18	HD3100717	probe	FBgn0003275	RNA polymerase II 18kD subunit	RpII18	81	TCGACGAGCTCATCATGG	TGCTTAATCTTAGGCGGTATGA	TCGACGAGCTCATCATGGTGGACAACTAGCTAGTACTCAACCCCTTTATCCATAATAAATCATACCGCCTAAGATTAAGCA
HD3A1002	H19	HD3100622	probe	FBgn0025457	Bub3	Bub3	208	ATCTCTTCTCCAGACGCCG	AGAAGACGCCGCCATGTAT	ATCTCTTCTCCAGACGCCGTGCAAATTCGGAGTTTGATTTGTTTTAAGCAGTTTCTGTTTGAATTTATTGTTTTATTATCCACAAGTTGCTAGCAGAAAACTTGACAAAATGCGTCCCCCAGAGTTCAAGCTTAACAATCCGCCGGAGGACCTGATCTCCGCTGTGAAATTCGGCCCCAAATCGAATCAATACATGGCGGCGTCTTCT
HD3A1002	H20	HD3100718	probe	FBgn0050077	BLOC-1 subunit 1	blos1	207	CTACTTCAGCGTCGGCAAG	AACTTGTGAATGGGCGTTTT	CTACTTCAGCGTCGGCAAGTGCAAATCCCAGTGCTACTTGAGCGTTTTCCAAAGAATGCATTTGTATCCTGTGGAGATCCATTGAGTAAGTGTATGACCGGTTCTGCTTCCCATACAAACTTAGTTAATCCTAATTAAACTGAAATTTATAGAAGCTTAAGTAAATGATATGTACGACCAATTCAATAAAACGCCCATTCACAAGTT
HD3A1002	H21	HD3100623	control_pvr	FBgn0032006	PDGF- and VEGF-receptor related	Pvr	175	AGGTATCCATCTGACGGTCG	AAGTACGCCAATGTCGGTTT	AGGTATCCATCTGACGGTCGTAGCTGTAGGTGGCTGTTCCGGATCCGGTTCGTCCGGCTCGGGTGCCCGATCGGGGATCATTGTCCGAATTTCTGCGATGAGTTGGCGGTTGCGTGTTATTGTTGTGCGGCTCATTAATGTAAGAGTGGATCGGGAAACCGACATTGGCGTACTT
HD3A1002	H22	HD3100719	control_pvr	FBgn0032006	PDGF- and VEGF-receptor related	Pvr	175	AGGTATCCATCTGACGGTCG	AAGTACGCCAATGTCGGTTT	AGGTATCCATCTGACGGTCGTAGCTGTAGGTGGCTGTTCCGGATCCGGTTCGTCCGGCTCGGGTGCCCGATCGGGGATCATTGTCCGAATTTCTGCGATGAGTTGGCGGTTGCGTGTTATTGTTGTGCGGCTCATTAATGTAAGAGTGGATCGGGAAACCGACATTGGCGTACTT
HD3A1002	H23	HD3100624	probe	FBgn0026143	CDC45L	CDC45L	206	CAACGCACTGCACTCATGTA	GGCATCGATGTCGTAGTTGA	CAACGCACTGCACTCATGTAGAATTCTACTTTGCATCGTAAGCGATTGGAAAGAGACCGTTGTGTCTAGACGTAGACAGATTAGGCAGACGATTGGGATTCCCGCCAGAAGTGTTCACCATGTTTGTCCAGGATCTGCGCAACGACTTTTACCGCCAGCTGGTTGGCAAGCGCATCTTGATCGTGGTCAACTACGACATCGATGCC
HD3A1002	H24	HD3100720	probe	FBgn0039233		CG7006	210	TTGGCACAAATGTGAAGCAT	CCAAGTAGTAGAGGGCCGTG	TTGGCACAAATGTGAAGCATTTGATTGACCGGCCAGATGGAACATATTGCTTTCGGGAGCACAAGGATCGGGTCTACTACGTCTCGGAGCGGATTTTGAAGCTGAGCGAGTGCTTCGGCTACAAGCAGCTGGTGTGCGTGGGCACCTGCTTCGGCAAGTTCTCCAAGACCAACAAACTGAAGTTCCATATCACGGCCCTCTACTACTTGG
HD3A1002	I01	HD3100433	probe	FBgn0005671	Vacuolar H[+]-ATPase 55kD subunit	Vha55	206	CCTGCAATATCCGCTGTGTA	ATGTACATTGCAAGACGGGA	CCTGCAATATCCGCTGTGTATGCGTCTATATATACATAAACCACAATTAAACCACAAAATATCTAATCTACGTTGAGAGCCTGGATGCGTGTATCTCGGAGCCACCCAGCGTAGCCAAAACAATAACTAGTTAAATATCGTCCAAGCGAGCAAACCTACTCTAAAGTGTGTGTTTTAGTATTGAAGTCCCGTCTTGCAATGTACAT
HD3A1002	I02	HD3100529	empty
HD3A1002	I03	HD3100434	probe	FBgn0014018	Relish	Rel	222	GGACGCGAAAAGCATCTAAA	TTTTATTGGCGATATGCGGT	GGACGCGAAAAGCATCTAAATGAATTTATTGCTTCCGAAGATTTCCGCAAACTTATCGAGCACAACTCTTCTGATCTCGAGAAGATCTGCCAGTTAGACATGGGAGAGTTGCAGCACGATGGTCATAACCGGGCGGAAGTGCCATCGCATCGAAATCGTACAATTAAATGCTTGGATGACTTATTCGAAATTTACAAACAGGACCGCATATCGCCAATAAAA
HD3A1002	I04	HD3100530	probe	FBgn0017414	cag	cag	205	CCTTTGGGCTACAGTCGCTA	GGTGTTGTATGACCAGAGCG	CCTTTGGGCTACAGTCGCTAGCAAGAAAATGATTCAAGGCCTATAAAAAATGCCTTTGATGAAAGACACAATACTAGACAAAAAGTTTATTCTTTACAAATATAGTAAAATATGGAGTTTCTTAAACCCCCTAAACCGCAGCCATAAAAAACCTAGCATACGCCCTTGCCTTTTGTATACTTCATCGCTCTGGTCATACAACACC
HD3A1002	I05	HD3100435	probe	FBgn0016076	vrille	vri	207	GAGGCAAAGAGGAGAAGCTG	AGTTAGAAGCCTCGTTGGAGC	GAGGCAAAGAGGAGAAGCTGCTCCTGCTAGCGCCGCCGGGCAAACTCTATCCGGAGGCGTCTGTGTCCACAGCAATGCCCGAGGTCCTCAGCGGCACGCCCACCAACAGCCACAACAAAGCCAACATCGCCATGATGAACAACGTCCGGCTATCCAATATATCGCCGACTCTCTCGATGAACGGCAGCTCCAACGAGGCTTCTAACT
HD3A1002	I06	HD3100531	probe	FBgn0002989	okra	okr	214	CTGACTCCACGGAACAGGAG	GCCAAACTACGTCGAACTTGA	CTGACTCCACGGAACAGGAGCGACAACGGGCCATAGAGAAGACACAGGAGCTGATAGGTCTGGTCGATCAGTGCATCATTCGTCGCACTAATCAAATTCTAACCAAATATCTGCCGGTTAAGTTTGAAATGGTTATCTGTGCGAAACTGACGGCGATTCAACTCGAGCTATACACGAATTTCTTGAAGTCTGATCAAGTTCGACGTAGTTTGGC
HD3A1002	I07	HD3100436	probe	FBgn0263916	Equilibrative nucleoside transporter 2	Ent2	219	GGACTTCAAGTTCGGACCAA	TCGAGCATGGCCAAAATAAT	GGACTTCAAGTTCGGACCAAACAACACCGTGGCCACGGAAGTGAGTTACCGCACCCATTTCATGCAAAATATGGGCTTTGCCTCGCAGATTCCTAACCTGGTCTTCAACTGGCTGAACATCTTTGTCAACTTTGGCGGCGACCTGACCACCCGAATCGTCTACAGCATCATCTTCGAAATGGTCATTCTGCTGGTTACCATTATTTTGGCCATGCTCGA
HD3A1002	I08	HD3100532	probe	FBgn0053182	Histone demethylase 4B	Kdm4B	203	GTAACCGGCAAACAGGGATA	TCTGTGATACTTCCGCTGACA	GTAACCGGCAAACAGGGATACTACCAGCAGATTAACATCCAGAAAAAGCCACTCACAGTTAAGCAGTTTAGCGAGTTGGCCAGCACCGAGCGTTACGCCACACCCAAACACTTTGACTTTGAGGATCTGGAGCGCAAATACTGGAAGAACATAACATATGTGGCGCCCATTTATGGGGCAGATGTCAGCGGAAGTATCACAGA
HD3A1002	I09	HD3100437	probe	FBgn0086130	DEAD box protein 21E2	Dbp21E2	209	GATTCATCCGCAACTCCTTG	TGTTGAGTTTTCGTTCGGTG	GATTCATCCGCAACTCCTTGAGAACTTGCGAGTCGAGCTGGGCATCAAATTACTGACGGGAATCCAAAAACAGGGAATGCCCGTTGTCCATGGAAATGAGCACTGCCTCATTGCCGCTGAAACTGGGTGTGGAAAAACAATTACATATCTCCTGCCTATCGTAGACAAACTCCTCCAGAAAGAAGTGGTCACCGAACGAAAACTCAACA
HD3A1002	I10	HD3100533	probe	FBgn0001987	Gliotactin	Gli	220	GCCCAAAACGAATCCCTAAG	CCGGTGCTCGGTAGTAGAGA	GCCCAAAACGAATCCCTAAGTCCGTACTATGAACTAGATGGACGTTTCTTCGATCAGAAAATAAGGGAACACGTTTTCCGCTACAACTATACACTTAATCCGAACGGAGTTTACGAGGCCATCAAGTACATATACACCTTCTGGCCGGATCCCAATAATAACACCATAATCCGGGACCAGTACATAAACATGCTGAGTGATCTCTACTACCGAGCACCGG
HD3A1002	I11	HD3100438	control_rh6	FBgn0019940	Rhodopsin 6	Rh6	167	CCTGCGGCACTGACTACTTT	TGAAAGGCCAAAATCAATCC	CCTGCGGCACTGACTACTTTGCCAAGGACTGGTGGAACAGGTCCTACATCATCGTCTACTCCCTGTGGGTCTATCTCACGCCGCTGCTGACCATCATCTTCTAATATGACATTCGTTACTAATTATCCAAGGATTCTGTTTGATTAAGGATTGATTTTGGCCTTTCA
HD3A1002	I12	HD3100534	control_rh6	FBgn0019940	Rhodopsin 6	Rh6	167	CCTGCGGCACTGACTACTTT	TGAAAGGCCAAAATCAATCC	CCTGCGGCACTGACTACTTTGCCAAGGACTGGTGGAACAGGTCCTACATCATCGTCTACTCCCTGTGGGTCTATCTCACGCCGCTGCTGACCATCATCTTCTAATATGACATTCGTTACTAATTATCCAAGGATTCTGTTTGATTAAGGATTGATTTTGGCCTTTCA
HD3A1002	I13	HD3100439	probe	FBgn0040066	will die slowly	wds	201	CCAGTGGACAGTGCTTGAAA	CCGAGAAGTTGGCGAATATG	CCAGTGGACAGTGCTTGAAAACCCTGATCGACGACGACAATCCGCCCGTCAGCTTTGTAAAGTTCTCGCCCAATGGCAAGTACATTTTGGCCGCCACGCTGGATAATACGCTCAAGTTGTGGGACTACTCGAAGGGCAAGTGCCTGAAGACGTATACGGGTCACAAGAATGAGAAGTACTGCATATTCGCCAACTTCTCGG
HD3A1002	I14	HD3100535	probe	FBgn0038462		CG17556	209	CTGTGGGTTGCTGTGCTAGA	TCATCGTACTGCTCCAGGG	CTGTGGGTTGCTGTGCTAGAGGACAAGGTGCACAAGACCGGCAACGAGCGGCATCTCATCCTGGAGCAGGTGATCATCGCGGCATTGGATACGGCTCGCTTTGACATCGCCACCAAGTGTACCAAGCAGCTGTCCCTCGAGTTCCCGGGCAGCCTGCGCGTGATGAAGTTCAAAGCGATGCGCTACGAGGCCCTGGAGCAGTACGATGA
HD3A1002	I15	HD3100440	probe	FBgn0050011	gemini	gem	225	GTGGACGTACCGCTTTCGTA	GGTGGCACTGTTTGTGTTTTC	GTGGACGTACCGCTTTCGTACGGCCTCTGCCACGTGTCGCAGCCGTTGAGCTCCGGCTCACTGAACACTGTCGAGATCTTCTGGGACCCACTGAAGGAGGTCGGCGTCTACATCAAGGTCAACTGCATTTCAACCGAATTTACCCCAAAGAAGCACGGCGGCGAGAAGGGTGTGCCCTTCCGACTGCAAATTGAAACCTATATAGAAAACACAAACAGTGCCACC
HD3A1002	I16	HD3100536	probe	FBgn0261976	Psf2	Psf2	212	ATTGGCGAAAAATGCATGA	TTTTCCTCCTCCTTGATTTCC	ATTGGCGAAAAATGCATGATCAGCATAATACCGAACTTCAGCAACGAGCCTCTGCACCTGATATACGGACCTGTGGGCCCTTTCCGAGCCGGTTTTCCCGTCTTCGTGCCCCTGTGGATGGCCACGCATCTGCGCAAGCAACAAAAGTGCCGAATTGTACCTCCAGAATGGATGGACATGGATATATTGGAGGAAATCAAGGAGGAGGAAAA
HD3A1002	I17	HD3100441	probe	FBgn0262619	DNA ligase I	DNA-ligI	216	CGGAAACTAAGCCCAAGGTA	AGTAGGCATTCTTGAGCGGA	CGGAAACTAAGCCCAAGGTAGAACCTATGTCTGTGGATTCCGAGGAGAAGACAAGTCCGGTGAAAAATGTTAAGAAGGAACCAAAGGAAGTCGATGACAAGACCACTGACAAGAAGGTCACAACCATAGGTCTCAACTCCACTGCCGCTACTAAGGAGGATGTGGAAAACTACGATCCATCCGCCGACTCCTATCATCCGCTCAAGAATGCCTACT
HD3A1002	I18	HD3100537	probe	FBgn0004106	cdc2	cdc2	203	CGTTACTTCGCTACCCGACT	AATTTCGAACTAAGCCCGATT	CGTTACTTCGCTACCCGACTATAAGAACACGTTCCCCTGCTGGTCCACGAACCAATTGACCAATCAGTTAAAGAATCTCGATGCGAATGGTATTGATCTCATACAAAAGATGTTAATCTACGATCCAGTTCATCGCATTTCCGCCAAGGACATTTTGGAGCATCCCTATTTCAATGGTTTTCAATCGGGCTTAGTTCGAAATT
HD3A1002	I19	HD3100442	probe	FBgn0032816	Nuclear factor Y-box B	Nf-YB	225	GGGGAAACAGTAACCCCTTT	ATGCATATAAAATCTGTGGTTACAAT	GGGGAAACAGTAACCCCTTTCTTACTTACCCTGTTAGTTAAGGTTCTTTTGACATTAAGGAAATATTTGTCTAATTCAAAGTGTTTTGTTTAATCCTAACAGTACACCTTGATTGACTATTTAAGTTAATATTATCATTACTATTCTTTCTGATTATTTAATTTTTTATTTTGTATATATGATATATGATTTTATTTTAATTGTAACCACAGATTTTATATGCAT
HD3A1002	I20	HD3100538	probe	FBgn0039066	Elongin A	EloA	217	TTCACGGTGGGATTACCTTC	TCTTTATCCGGTTGGCTTAAA	TTCACGGTGGGATTACCTTCCAACTTTATTGGCAAAGACTTTCAGGTCTGAATAAAGTGACATTGTGATACTAGACCTTCTACTTCCCAGTGCGCTGTGGAATCAGACTGCTGCTGTCGGCATGCGTAGCATATGCATGCTATTTATTATTTATTCATGTTCTGCCCTCTTTTATTACGCTGTATAAGTCACTATATTTAAGCCAACCGGATAAAGA
HD3A1002	I21	HD3100443	probe	FBgn0025864	Calmodulin-binding protein related to a Rab3 GDP/GTP exchange protein	Crag	204	AAGGAGCCAGAGATACTGCG	GCGGTTGTAGAAGCCATAGG	AAGGAGCCAGAGATACTGCGCGCCGCCTACGATGTCCTCGTGCGAGCCAGTCGTCTAAAGATCACCTGTGACGAGTTCTGCTACAGGATCATGATGCAGCTATGCGGTATTCACAATCTGCCTGTGCTGGCCGTCCGTCTGCACTACCTGATGAAACGCTCTGGCGTGCAGGCCAATGCGCTCACCTATGGCTTCTACAACCGC
HD3A1002	I22	HD3100539	probe	FBgn0261396	Regulatory particle non-ATPase 3	Rpn3	217	GAAACGTAACGGCTTAACAGC	ATCTCCACGTCGTTAGCACC	GAAACGTAACGGCTTAACAGCTCTGTTAACCAACTAAATTTACCAGCACTGCCTGTAGCCGAAAACGAATAAGAAGAAGAAGCGACATTACTAGGCATTTTTGATTGGGATTGAGAAAAACAAAAGAAAAGTCGGCTATATTTGTGACCCCAGTAAATTGAGAGTTCCATTACAAAATGACCAACGCAACGGACATCGGTGCTAACGACGTGGAGAT
HD3A1002	I23	HD3100444	probe	FBgn0039338	XNP	XNP	209	GCAGCTGCTGAACATGAAGA	GATTCTGGTTGGCGTAGAGC	GCAGCTGCTGAACATGAAGATATCGAAGGATCATCAGGAGCTCAACCAGAACCAGGTCATTCAGCTGGTGCCTACCTATCTGCAGCAACTGTACAATGAGATGAACAACGGCGATCCGACCATGTACAAGGATCTCCTCAACCTGCACTCAAATATTGTCCATCCCAGCGGGATGTACATGAATCCCCTGCTCTACGCCAACCAGAATC
HD3A1002	I24	HD3100540	probe	FBgn0260962	piccolo	pic	224	CCGAAACTAGCAAGGGAGTG	CACAGCAATGTCCAGAATGG	CCGAAACTAGCAAGGGAGTGACTGTGAAGGACATAAAAGTGGAGCAACTAGGCGAGATCTCTATACCAGAGTGCATTACATACCTAGACAATGGTTTCCTTTACATTGGAGCACGTCATGGAGACTCGCAGTTGGTGCGCTTGAATTCGGAGGCCATCGACGGGTCATATGTCGTGCCTGTAGAGAATTTCACCAATCTAGCTCCCATTCTGGACATTGCTGTG
HD3A1002	J01	HD3100625	probe	FBgn0028695	Regulatory particle non-ATPase 1	Rpn1	220	GTGCCGGACTACGATGATCT	CGGCGTTAACAAAACCATTT	GTGCCGGACTACGATGATCTCATGGAGATCATGTCGAATGCTAATCTGAACAAGCATTTCCTCAATCTGGCTCGCGAACTGGACATCATGGAGCCCAAAACGCCTGAGGACATTTACAAGTCGCATTTGGACAACTCGCGCTCCCGCTTTGCATCCATCCAGGTAGACTCTGCCAAGCAAAATCTGGCCGCTAGCTTTGTAAATGGTTTTGTTAACGCCG
HD3A1002	J02	HD3100721	empty
HD3A1002	J03	HD3100626	probe	FBgn0026326		Mad1	222	GTCTTAACGACACCGCCTCT	TCTTCTTGCTGGTGATGTCG	GTCTTAACGACACCGCCTCTTCCCTCAATATGCCCGCCAACGATTCCATGGCTTCTTTGCAGAACAGCAAACTACGGACCGAGCTGATCGAAACCAAGGCCATAGTAATTCAGCTGCGTAACGAAATCGAAAAGAAGAGCCGGGAACACAAAGAGGCCATATTGCTGGCTGAGAACAAGAGCACGGCCTTAAAGGATCAGTGCGACATCACCAGCAAGAAGA
HD3A1002	J04	HD3100722	probe	FBgn0039829		CG15561	206	AATCCATAGCGGAGGAGTTTT	CTCTTCGACTTCCACACCGT	AATCCATAGCGGAGGAGTTTTCCGAGGCATGTGAGGTTTCCCAACTGGAAGAGCCCATAAAATCCAAGAAAAAGAAGAAAGACAAGGCTGAGAAGGCAGGAAAGGAATCCCCAGCACATCAAACTCCAGAAGATCCCGTCAAGATCAAGAGGAAAAAAAATAAGACACGGGAGCCGGGAGAGGAAGACGGTGTGGAAGTCGAAGAG
HD3A1002	J05	HD3100627	probe	FBgn0032748		CG10492	218	CAGCCACGGTCACACAAAT	CGCTGTTATTCGGAGGAGAC	CAGCCACGGTCACACAAATCAAAGTGGAAAAAATTTTTAGACAAAAAGGTGCACACAATGCAAATTAATTAAAGGCCGTGCGTATTAAATGCCCTAATACGCGATCCTACGTACTGTATTTTGCTGCCGAAAAGTGCAACGCGCGCCTATCGGGGAGTTTCGCGGAAATTGCTGGGTTTTTTGTGACAGCGGCGAGTAGTCTCCTCCGAATAACAGCG
HD3A1002	J06	HD3100723	probe	FBgn0261641		CG42724	219	TCTCTACGCCAGCAGGACTT	GAAATGCGACAAACAGATCG	TCTCTACGCCAGCAGGACTTGAATTAATCCAACGTTCTTTTCCAGTTAAGTCTGAAATCGCTAACCAAACCCGCTCTCTTTCAGGCACAAATCGTGTAACTATGTTCTATAGCTTAAGAAAAATAAGTCTAAGTCTTAAGTTAGGCAATTAAGCATAGAGTTTTAAGTGAAGCCGCAACAATTCGAGACCCCTCTAATTCGATCTGTTTGTCGCATTTC
HD3A1002	J07	HD3100628	probe	FBgn0037120		CG11247	213	AACCAAAGGTGAATGGGAAC	TCCTTGGACACACTACGACG	AACCAAAGGTGAATGGGAACTATCCTAGAAGTAGCAATCGAACCAAAAAATACGAATACCCTAAATTACATACGTAGAACATTAACCCTAGAAGTAAAGACAAACGCAGCAGGTGCCGGTGTTTCCCAGGAAGCGGTCCCCAGAAATTTAGTTACGAATCCAAATAATAAAAACCAAACAAATGGTACGCAGCCGTCGTAGTGTGTCCAAGGA
HD3A1002	J08	HD3100724	probe	FBgn0003278	RNA polymerase I 135kD subunit	RpI135	201	GAGGACGAATCATCCCTGAG	TTGCACGCAGGACACATAGT	GAGGACGAATCATCCCTGAGCAATGTAGTACATTATTTAAACAATGGAACTGCAAAGTTTATGTTTTCTCACGTCAAGAGACTATCATACGTACCAGTTTGCCTGATCCTCAAGTGCCTAATGGATTATACAGATGAGGAAATATACAACAGATTGGTGCAAGGCTACGAGTCCGACCAGTACTATGTGTCCTGCGTGCAA
HD3A1002	J09	HD3100629	probe	FBgn0032796		CG10188	217	GCTTTCTGAGCGAGAACTCC	CGGATGGTCTGAATCCAAGT	GCTTTCTGAGCGAGAACTCCGGTCACAACAAGTACTCATTCTTCACGCCGGAGCACAAGGCTGGAGTGGTTCCTCTCCAGAAATTGCTTATCCGCGAAAAGGCAGGCACCGAATCCCGGGGAATATATATTATCAGTTCCAATCCGGATTTCCCAGAAATGTACGAGCTGAAAGTGCAGACGCCAAAGGACAAGAACACTTGGATTCAGACCATCCG
HD3A1002	J10	HD3100725	probe	FBgn0031777		CG9154	202	GAGGCCTATGGCACAGATTT	CGGAGCACAGGATTACCTTG	GAGGCCTATGGCACAGATTTTGTGCACTACGACTTGAACTGCGTAGGGAGCAACCCGGACTACCTCAAAGAGCACCACCAGCAATATGACCTCATCGTGGCCGACCCGCCCTTCCTGTCCCAGGAGTGCATCGCCAAAACGTGTGAAATAATCACTAGGCTGCAACGAAACCAGAAGGAGAGCAAGGTAATCCTGTGCTCCG
HD3A1002	J11	HD3100630	control_rh6	FBgn0019940	Rhodopsin 6	Rh6	167	CCTGCGGCACTGACTACTTT	TGAAAGGCCAAAATCAATCC	CCTGCGGCACTGACTACTTTGCCAAGGACTGGTGGAACAGGTCCTACATCATCGTCTACTCCCTGTGGGTCTATCTCACGCCGCTGCTGACCATCATCTTCTAATATGACATTCGTTACTAATTATCCAAGGATTCTGTTTGATTAAGGATTGATTTTGGCCTTTCA
HD3A1002	J12	HD3100726	control_rh6	FBgn0019940	Rhodopsin 6	Rh6	167	CCTGCGGCACTGACTACTTT	TGAAAGGCCAAAATCAATCC	CCTGCGGCACTGACTACTTTGCCAAGGACTGGTGGAACAGGTCCTACATCATCGTCTACTCCCTGTGGGTCTATCTCACGCCGCTGCTGACCATCATCTTCTAATATGACATTCGTTACTAATTATCCAAGGATTCTGTTTGATTAAGGATTGATTTTGGCCTTTCA
HD3A1002	J13	HD3100631	probe	FBgn0051223		CG31223	220	CTGGATGAAGACCTGGAGGA	CAGCTTCTTCGGGTGTAGGT	CTGGATGAAGACCTGGAGGAAGACATTGCAACTCGACTGAAAGGCGTTGATATCAACGATGCGGATGAAGTTTGGAGCCGGTTAACTACAGAGGAGCAAGATGAGTTCCAGAAATTGATCACCAATGGAGATATCATGAAGCTTATGCCAGACTACAAGCCCTGGTGGATCAAGCCGAAGAACTCTAAGATTGTGATTATACCTACACCCGAAGAAGCTG
HD3A1002	J14	HD3100727	probe	FBgn0266377	Phosphodiesterase 8	Pde8	223	TGGCCATCAGTCAATCAATC	CCTTGTGATTTCGGTTTTGC	TGGCCATCAGTCAATCAATCAGCAGACCGCAGCCCAAAAATGTTTCAATTATGTTATCGCCAGCAACAACGACATCGTCCAGAATCGAAAGCATCGAACCAGAGCAGCAGCAACCACAAGAAGGCAGCCGCACTGTCCAGGACGAAGGAGTAAGACGTGCAATTCCGCAAAGGCTAAATCCGGATACGGAACCGGAGCCCACTGCAAAACCGAAATCACAAGG
HD3A1002	J15	HD3100632	probe	FBgn0029992	Upf2	Upf2	207	AAGAAATCCCATCCCGTGTT	CGGATCCTGAGCATTATTGG	AAGAAATCCCATCCCGTGTTCAGCAAAACGGAGAACACCTCCGATTTGTTCCCCATCCTAATGGATCACACCTATCGCGACTGTCTACTCAATGTGCGGCCCAAGCTGAAGATTTACAAGAGTCTAGAGCAGGCCAAGGCGGCGATTGATCATCTGCAGGAGAAGCTCTATCCGCAGCTAAAGACTACCAATAATGCTCAGGATCCG
HD3A1002	J16	HD3100728	probe	FBgn0035603		CG10635	81	AACAGCAACTGTTTGTAAAATATCA	TCGCTACTTTTGCTGCCATT	AACAGCAACTGTTTGTAAAATATCATAAATTATTTATTAAATTAATTAAAACCAACGGGAAAATGGCAGCAAAAGTAGCGA
HD3A1002	J17	HD3100633	probe	FBgn0051249		CG31249	216	CCGGTAGTGGGTAAACCCTT	CGTCTAGAATCCCACTTTCCC	CCGGTAGTGGGTAAACCCTTCCCTTTTGACAAGGGAAACGACGTCGTCTCGTCCAACGACTCTGCCCTGGACCTGCCCATGCGCATACTACGTCTTCTCCAGATCCAGAGCCTACGCGAGCTGCAGACACACATCAATGAGACCATTGTGGCGGTGCAGAACATCACGGCCAATCCAAAGACTGATACCAAGCTGGGGAAAGTGGGATTCTAGACG
HD3A1002	J18	HD3100729	probe	FBgn0000259	Casein kinase II beta subunit	CkIIbeta	89	GGTGGATGAGGACTACATACAGG	AGATCATGTCCAACGCTTGC	GGTGGATGAGGACTACATACAGGATAAATTCAATTTAACTGGTTTAAATGAGCAGGTACCCAACTATCGGCAAGCGTTGGACATGATCT
HD3A1002	J19	HD3100634	probe	FBgn0004837	Suppressor of Hairless	Su(H)	201	CAGCACCAGCGAACAGTGTA	CGTTGGGATTTACAACCGTA	CAGCACCAGCGAACAGTGTATAAAGTGCCAAACGAATTTGCCAAATAGCCAAAAACGAAATAATAGAAAAGATCCAAACAAAATTCCAATAAGTTCAATGCAAGGAGACATGTGCATAAATGAAGAGCTACAGCCAATTTAATTTAAACGCCGCCGCCCCGCCCGCCATTGCCTACGAAACTACGGTTGTAAATCCCAACG
HD3A1002	J20	HD3100730	probe	FBgn0038475	Keap1	Keap1	208	CCCAACACCACAAGGATGAT	CCGAGTCGTAGGAAGATCCA	CCCAACACCACAAGGATGATATTTGTCGCCGGTGGCTTTTTTCGTCACTCACTGGACATTCTGGAGGCCTACAATGTAGACGACATGACGTGGACGACACTGGCAAATCTACGCATTCCAAGATCTGGTTTGGGTGCCGCCTTTCTCAAGGGCAAGTTCTATGCGGTTGGAGGCAGAAATAACAACATTGGATCTTCCTACGACTCGG
HD3A1002	J21	HD3100635	probe	FBgn0265935	coro	coro	202	GCTCAGGACTGATCGCTGAC	GCCGACTCTACGATAATGGC	GCTCAGGACTGATCGCTGACCCAAGCCACTGCAGCATCAAGATGTCATTTCGCGTAGTGCGCAGCTCCAAGTTCCGCCACGTCTACGGACAGGCTCTCAAGCGGGAGCAGTGCTACGACAACATACGGGTATCCAAGTCCAGCTGGGACTCCACATTCTGCGCGGTGAATCCCAAGTTCCTGGCCATTATCGTAGAGTCGGC
HD3A1002	J22	HD3100731	probe	FBgn0011823	Pendulin	Pen	208	GCAGGCATTGACTCCAATTT	TTGTACCTTTGCCCTTTTGAA	GCAGGCATTGACTCCAATTTCGCATCGATTACGAGAGTACTGTCTACGTTTGTCTACAGTTTCACCGACACATTCAGCGTGCTAACACGCTCGACAAATTCTCGTGCTCGCGTTTCGTTAGGGAACGATAAAAATTGTGTAAAAATTCAGTAAAGTGAATTTCCATTCGAAAAAGCCAGCACACGCATTCAAAAGGGCAAAGGTACAA
HD3A1002	J23	HD3100636	probe	FBgn0011774	Inverted repeat-binding protein	Irbp	215	CCCCAGATAATGGGGAAGAT	TGGATCGTTGATGAGATTCG	CCCCAGATAATGGGGAAGATAAGAACTATCGCTCTCTGCTCTGCGGTGACGGATTCAAGATTGTCTACTTGCCGGAGGCCAAGCACATCCGCCACCTAGACTTGCAGGACTGGAACAATACGGAAAACACTGCTGACGAACAGAAAGTCGAGTTTTTCCAAAAGATCATCAAGAAGCTGCGCGTTGACTATCAGCCGAATCTCATCAACGATCCA
HD3A1002	J24	HD3100732	probe	FBgn0011704	Ribonucleoside diphosphate reductase small subunit	RnrS	205	ATCGAAACAGTTTGCCGC	TGTTGTCAGCAATGTTTTCCTT	ATCGAAACAGTTTGCCGCCCGGCATAAAACCCAATGTAGCTGTATTTCCCAGATCATTTGCCACACAACTTTCAAACTGTACACTTAATACACGTCGTGGTTTAAGTGAATTTTACCAGAGAATCAGAGAAGCGCCCCTACCTGCTAATAATAATCCATTCAAAAACATCTCAAATGGCGTCCAAGGAAAACATTGCTGACAACA
HD3A1002	K01	HD3100445	probe	FBgn0030800		CG9104	212	CCTGGTCAAGTCGTGCATAC	TCATCGAGGCGTAGAACTGA	CCTGGTCAAGTCGTGCATACAGAATCTGGTCTACTACGGGGTCGTTCAGCTGCTGCCAATCCTGAAGTACAGCAACGTGTACATGACGCAGAACCTAAAGCATCTCATCCAGAGCGCATCACTGAGCGGCGCATGCCGGAAATACGTGGCCTTGCGTCCGGACAAGACGCTGCCCAGTGTTCAGCGCATCTTTCAGTTCTACGCCTCGATGA
HD3A1002	K02	HD3100541	empty
HD3A1002	K03	HD3100446	probe	FBgn0010621	T-complex Chaperonin 5	Cct5	207	CATTCGGAACATCCAAGGAC	CCAACGAGCAGCTAATCTCG	CATTCGGAACATCCAAGGACAAGATGCTGGTCATCGAGGAGTGCAAAAACTCCAAGGCTGTGACCATCTTCTTGCGTGGAGGTAACGCCATGATCATTGCGGAGGCTAAGCGATCGATTCACGATGCCATCTGCGTGGTGCGTTCGCTTGTGAAGGACTCGCGTATTGTTTACGGTGGTGGAGCTGCCGAGATTAGCTGCTCGTTGG
HD3A1002	K04	HD3100542	probe	FBgn0029711	Usf	Usf	209	ATCCCCGTCCTCCGTAAATA	CTCCGCAAATGGTGAGAAAT	ATCCCCGTCCTCCGTAAATATCAGCAATGCGAATCCAACAGCTGGACCTGGCCTCATGACCATTACCAATCACCACACCGCTGATTTGTCAGAGGCCCTGGTCCACAGTTCCTTTGCCAATGGTCAGCAAAGTCTGATTCTCACCAGCGACACGGGAAATCCGCTGATGAATAGCCAAGGTGCTCAGATATTTCTCACCATTTGCGGAG
HD3A1002	K05	HD3100447	probe	FBgn0001139	groucho	gro	218	GTCGGCGATACCTACCTACG	ACATTTGTTGTTGCATTCGC	GTCGGCGATACCTACCTACGTTCATCTTAACATAAAAACAAATAGGAGGATAAGTGGAATTAGTCAGTCATTGCAATTGCAGGAGCGTTGAGATTATGATTACCAGCTGAACAAAAGGAGTTAAATACAAATACGATGCGAGTGCTTTTAGTTTGTTTTATGTGAGCGGTTTTTGTAATTTAGCTGAAAAGTCAGACAGCGAATGCAACAACAAATGT
HD3A1002	K06	HD3100543	probe	FBgn0036104		CG6418	217	GAAATGGAATTGGCTGCTGT	GGTGGCCACTAGAATATCGC	GAAATGGAATTGGCTGCTGTGCCATCTGGTGAAGTTCCTTTCCGAAGGAAGTGTCCTGATCTTTGTGACTAAAAAAGTAGATGCTGAAACGGTGTCTAACAATCTTTTAATTAAGGAGTACAATTGTCTTTTACTCCACGGCGATATGGACCAAGCGGACAGAAACAAGGTCATCACTCAGTTTAAGAGAAAAGAGTGCGATATTCTAGTGGCCACC
HD3A1002	K07	HD3100448	probe	FBgn0004396	Cyclic-AMP response element binding protein A	CrebA	222	CAGTCGCACTACGGACAGTT	TGTTTTGGACTCGATTACGATTT	CAGTCGCACTACGGACAGTTTATTCTAATTGTGTGCTACCATCCCATACATCCAAACATACAAATATTATTGCTAAAGTTAACGATATTAACTACACATATTAAATGCTATTATACACGGGCCGAGCAAAGCCATTTCTAAAGCGGTTTACTGCCCATTCACACACAAAACACATCAAAAAATTCAATTAAATCAATTGAAATCGTAATCGAGTCCAAAACA
HD3A1002	K08	HD3100544	probe	FBgn0034897	Sestrin	Sesn	213	GGAAGAGCCGCGAAAATACT	TTTCCATTCTTGCATTGTGG	GGAAGAGCCGCGAAAATACTGTTTTGAACACAACGAAAAGATGGAGTAAATGGAGCGTGTGCTAAGCTACATGGATAGCAATTAATAGCCATTCGATATCGGTGTCCATTAAATGAATGTGAATCGTTTACTACTCAATTACCAATAGTCTGTGTCTATGGTTAGCCAACACGCCAATTAATCACGTATGCAGCCACAATGCAAGAATGGAAA
HD3A1002	K09	HD3100449	probe	FBgn0028837	COP9 complex homolog subunit 6	CSN6	223	ACGACAGCTTATACCGGAGC	CAGCCATTATGTTTCCCTGC	ACGACAGCTTATACCGGAGCTTGTCAAACAAAAAGAAGTAAAATTAAGTTTATACCGCAAACTACGTGTAAATAAAGGCCCCCCGACAGCATGGAGCAAATGGAAGTGGACGTTGACATGTCGGCCAAGCCCAGCACATCGTCCTCCGCCGCCGCCGGGAGCAGTATGGCAGTGGATAAGACTGCGGATCAAAACCCACAGCCGCAGGGAAACATAATGGCTG
HD3A1002	K10	HD3100545	probe	FBgn0263933	ebi	ebi	205	CTGGGGCAAGTCAAAAGAAA	TCCGGATTGGAGGTTGATAC	CTGGGGCAAGTCAAAAGAAATCCCAGAACTCGAATGAAGCGGGAAGCTCATCTAGTGGCAATGCAGGCAATGCAAATGCTACCAGTACCGATGATGCAGCCTCCTCAACATCCACAAATGGCAATAGCAGCACTTCCAGCAGCGTAGAACAACCTACAAGCGGGCTGACGCCCGCTGGTGGAACTGTATCAACCTCCAATCCGGA
HD3A1002	K11	HD3100450	probe	FBgn0034599		CG9437	223	GTCCGCACCTGAGCCTATT	CACCTTGGCCTTGATCTTGT	GTCCGCACCTGAGCCTATTGAGTCTAACCACGCGGATCTGAACTACTTGGTCTGTATGCCGCCCAATGCGAATCAGGAGCGAGAGCATTCCGCCCCAGAATTACCCAATCCCACGGCCGTCATCACCCAAAAGACTTGCGAAACAGAGGACGACTTCTTTTGCAAGTCGATTGCCGCGTATTTGCGCCAACTGTCGCGCGTGCACAAGATCAAGGCCAAGGTG
HD3A1002	K12	HD3100546	probe	FBgn0035021		CG4622	203	CACCACAATGTACCGCCAT	GGAGGGTCCTCTGTTTCCTC	CACCACAATGTACCGCCATTCCAAGAGAGCCAGTCCAAGGAGAACTTCATTAAATCGTTGGGCGAAAACGTGATCAACGGTTACAAGCGCAAGAAGCTAGTGGATTTGCCTGCTCCACACGACCGTGTTCCCGCTCCCAGCGAGTTGCTGACCAGCTTCGATGACTACGACATGGAACTAGAAGAGGAAACAGAGGACCCTCC
HD3A1002	K13	HD3100451	probe	FBgn0017578	Max	Max	225	CTTCCGTTTTCACCGACATT	AAATTAAGGTCGATTGGGTGG	CTTCCGTTTTCACCGACATTCTGAATTCTTACGTGGATTTAGTTCAACTTTGAGTTGTGTTATACGAAAGCAATAGCCCTCGAAAAGTTGTGAAGGAAACGGTTCCAAATTCGAATTAAAGTGAAAATTAAAATTATGTGGAAATGAGAACAGTAACAAGTCCGATAATCATAATCATCATTAGCTGTAAGCCCAAAATGTAACCCACCCAATCGACCTTAATTT
HD3A1002	K14	HD3100547	probe	FBgn0010438	mitochondrial single stranded DNA-binding protein	mtSSB	201	ACTGGCATCGTGTAGTGGTG	GGCTTAAATTTTAGTTGTTGGCA	ACTGGCATCGTGTAGTGGTGTTCAAGCCCAATCTGCGTGACACCGTGCTGGAATACTTGAAGAAGGGACAGCGAACCATGGTGCAGGGAAAGATCACCTATGGAGAGATCACCGACCAGCAGGGCAACCAGAAGACTAGCACCAGTATCATAGCCGACGATGTGTTGTTTTTCCGTGATGCCAACAACTAAAATTTAAGCC
HD3A1002	K15	HD3100452	probe	FBgn0015805	Rpd3	Rpd3	202	TCCAGGGCTTTTTCTACACG	TTAGTTTCTGCGTTATTCGCC	TCCAGGGCTTTTTCTACACGCCCCTACACAAGGTCCCACTGCGATCGGCTCCTTTTTTTCAGTGGGAATATTCCCAAAGGGGGATAAATCAGTAATCAGTGGGCGGAAACACAATTTATTTTAAGATCGAAAGTGTATAGCTAAGCAAAAAGTGAATGCATACTTACAAGCGATCCAATGTGGCGAATAACGCAGAAACTAA
HD3A1002	K16	HD3100548	probe	FBgn0036964		CG6480	81	AAAGAACTCGAGCAGGCAAA	CCGATCGGCTTTCATTTTAC	AAAGAACTCGAGCAGGCAAAAGCTCAGGGATCTTTGCATGAAACTCTTCTGGATAGACGCAGTAAAATGAAAGCCGATCGG
HD3A1002	K17	HD3100453	probe	FBgn0086902	kismet	kis	223	GACCCTCAGACGTTCCTCAA	CGCCTCCTCCTACGTAATCA	GACCCTCAGACGTTCCTCAAACAACAGCAAAAGATGATGCAGTTCCTGCCCCCCGCTCAACGGAAGGCTTATGAAAACATGCTAGCCGAGATGGAACAGGCCATGAAGATCAGTTCAAAGTTTTCAACAAACTCACCACACGACGTCAAGGTCAACAAGTGGCTTTCAGACATGACAAGTCCACTGGGTGACCAGCTGAGCATTGATTACGTAGGAGGAGGCG
HD3A1002	K18	HD3100549	probe	FBgn0266111	anastral spindle 3	ana3	221	CCCGAGTACATGGTGATTCC	TCATACGCAGCAAGTTGAGC	CCCGAGTACATGGTGATTCCCCTATTAAAGATGTTTCTCATATTCTGCACGGACTCGAATTCGAACTCATTTCTCATCGAACAGATAAAGAATAAGCCATCTCTATTCATGGATTTCTTCCTGTTTGGATTGCATGTGAAGCTTATTAATTCGCCATTTCAGCGCTTTACTCTGTCAGCATTATCACTTGTGTTCACCAAAGCTCAACTTGCTGCGTATGA
HD3A1002	K19	HD3100454	probe	FBgn0011655	Medea	Med	201	GTTTCCCAAGCAGCCAATTA	TCCCACAAAGTTGGCGTAA	GTTTCCCAAGCAGCCAATTAAGTGCAAACTATGAAATTCCACGAAAAACAGTAAAAGCCAGTCTCTACCAAGGATTTGAGCAGGAAACTTCTCGCTGGGCGTGTGTGTGTGCAGTGCGTGTGCCAGTGTGCGTAAAGAAGGAGGTGGAGAAGACGAAGGAGAGGAGAGTTTTCGCAGGGAAATTACGCCAACTTTGTGGGA
HD3A1002	K20	HD3100550	probe	FBgn0015283	Regulatory particle non-ATPase 10	Rpn10	216	AGGGCGAGATAAACCTCCTG	GAATCTCGTTGTTGTTGCCA	AGGGCGAGATAAACCTCCTGACCGGAATCCGAATTGCCCATCTGGTGCTGAAGCATCGCCAAGGCAAGAACCACAAAATGCGCATCGTGGTCTTTGTGGGCTCCCCCATCAATCACGAGGAGGGCGATCTAGTGAAGCAGGCCAAGCGCCTCAAGAAGGAGAAGGTCAACGTAGACATAGTTAGCTTCGGTGATCATGGCAACAACAACGAGATTC
HD3A1002	K21	HD3100455	probe	FBgn0028692	Regulatory particle non-ATPase 2	Rpn2	204	CGATTCCCTTAACGAGGTTG	ATGAAGGCGTTGGCAATAAC	CGATTCCCTTAACGAGGTTGAAAAGTTGCATCAGAAGAACATTGAAAAGCTCATATCGATCCTCTCCGGCGAGGTTTCCATCGACCTACAGCTCCAATTCCTCATCCGCAGCAACCACGCCGATTTGCAGGTCCTTCGAGGCACAAAGGAAGCGGTCCGCGTGTCTATCTGCCACACAGCCACTGTTATTGCCAACGCCTTCAT
HD3A1002	K22	HD3100551	probe	FBgn0005660	Ets at 21C	Ets21C	132	CGCCTCCACTTCGAATTTT	CAGTTGAATGCATTTGTGGTG	CGCCTCCACTTCGAATTTTACTGCTCCATTCCAAGGTGGGACAGCCGGCGTAGACCCGGCCAGGACGTCCACATCTTCTGCGGGAAACTACGACCAGGGCCCGGTCACTCCCACCACAAATGCATTCAACTG
HD3A1002	K23	HD3100456	probe	FBgn0030521	Cathepsin B1	CtsB1	224	ATTTCACGGGCAGTACGAAA	CGATGAACTCATCCGAGAGC	ATTTCACGGGCAGTACGAAAACAAGAACGGAGCAGAGAGCCCGCTTAATACGACGCGTCATTTTCCACCATTTTACTGCTGTGATTTGTTTGAATTTTGCTGTGTCAGCGCATTGGAAATTCGTTGGACAAGAATAATGAATCTATTGCTCCTGGTGGCCACCGCGGCCTCCGTGGCGGCACTCACGTCCGGTGAGCCGTCACTGCTCTCGGATGAGTTCATCG
HD3A1002	K24	HD3100552	probe	FBgn0263197	Patronin	Patronin	225	CATCGACGCCTTCACAATAC	ATGTCTTAATGCGCAATCTTGT	CATCGACGCCTTCACAATACACAACTCCCTGTGGCAGGGCAAGCGGGTACAGTTGCCCAGCAAAAAAGACATGGCGCTTGTAATCTAAGCGGTGGGCTGAGTATTCTGAGTGGCATCTCGATTCGGATGCAGAAGGGTGGCGGCAGTGGAGCGGTTTGGCCAACGGGCGCTTGGCGCGGTTTTGGTCGCAACCACACTATTCTACAAGATTGCGCATTAAGACAT
HD3A1002	L01	HD3100637	probe	FBgn0010768	squeeze	sqz	215	TGTGTGTATTTTTGGCGTGC	TGATTTGTTTGTGGTCTGCG	TGTGTGTATTTTTGGCGTGCGCGGCCATTTTTTCTTGTTGCCACTCGAGAGTCTCTTCTGTGTGCGAAAGAGAGGCCCGACGGCAAAGCAGAACGTAGCAAACTACGCAAATCCCCACTAAATTCGCTAATTTTCGCTAAATAAATCAATCGCAAGGGGTGCCCAAAAACAAACAAAAGTACGAAAATAGAGTGCCGCAGACCACAAACAAATCA
HD3A1002	L02	HD3100733	empty
HD3A1002	L03	HD3100638	probe	FBgn0005655	Proliferating cell nuclear antigen	PCNA	224	CTACCTGAACGCCTTCACAA	AGGAATGAAGTGAACGTGGG	CTACCTGAACGCCTTCACAAAGGCGACGCCATTGTCCACCCAAGTGCAGCTGTCGATGTGCGCAGATGTTCCGCTGGTAGTCGAGTATGCGATCAAGGATCTGGGTCACATTCGCTACTACCTGGCACCCAAGATCGAGGACAACGAGACATAAGTCAGCTGTGTTCCTCATATTTATGTCCCCGCATCGTCACCACTCATCTTCCCACGTTCACTTCATTCCT
HD3A1002	L04	HD3100734	probe	FBgn0000152	Abnormal X segregation	Axs	212	CGGGCCAAGATACACTCATA	GTTTACGGGTGACGACGAGT	CGGGCCAAGATACACTCATACACGCAATTAGCACACACACGCACACCGCAAGTGCGAGCGAGATAGCAAGCACTTACTCATGCGAGCGGAGAAGAAAAGCAAAAACAAAATAAACGAAACTGAGAGAATTCTGCAATATCATATTCGGATGTGGATGTGATTGTTATATTTTGTTATTAGTTCAGCGACGCCACTCGTCGTCACCCGTAAAC
HD3A1002	L05	HD3100639	probe	FBgn0005777	Protein phosphatase D3	PpD3	212	TGGCTTTAGAAGTCGGATGC	GGTTTTTGAACAAAACTGGGG	TGGCTTTAGAAGTCGGATGCTAAGTTTTATCGGTGCCAAGCATCTGGGGTTCCACTTGTAAGTAAAAATTGAAAGAAAATGTTTGTTTATGCATAGCATTTAGTTATGGCTACCAAAACATAATATACGATTACATATATACAATTTTTCATCAATTTTGTTTGTTCCGAACGCTTTATTTGTGTATAAAACCCCAGTTTTGTTCAAAAACC
HD3A1002	L06	HD3100735	probe	FBgn0003042	Polycomb	Pc	203	CGAGTTGGCTATCCCAATGT	CCATAAAGGCAGCACTTGAG	CGAGTTGGCTATCCCAATGTTGTAATTGTTTAATATTATATTTCCTCGCGCCGACTGATTTTACAAAAGAAAACCCCAAAAACATATATACAATTGTAGATTTACAAATATTTTTAGACTTTAGCTAACCAAAATCTCTACGTAATATTTATTTTAACATGTTCTCTTAGCAGTCATTCAAGACTCAAGTGCTGCCTTTATGG
HD3A1002	L07	HD3100640	probe	FBgn0033316		CG14749	206	CAATAAACCTGCCCCTCAAC	GCATATGGCAGTCTCCGTTT	CAATAAACCTGCCCCTCAACGCCATTTCAGCAGTTAGTCCGCAGCATCTAGCCCAGAACTTTGACAAGCTGTACAGCTTCTTTGCCGGCCAGCCTACCAAGGTGATGAATGGCACCATAACTATTAACGACCATCCGCTGGCCCGAGACTATTGCATGCTACTTATGGCCAAGAAGTTTGTCAGTCAAACGGAGACTGCCATATGC
HD3A1002	L08	HD3100736	probe	FBgn0034879	Rrp4	Rrp4	204	GAGGGAGGATTCGCTCAGA	CTGGCCGATGTCGTAGATG	GAGGGAGGATTCGCTCAGAACCTGAACGAGCATGTGCCGCGCGCGGATCGGGAGGTGATCGCCCGGCTGAGGAACTCCATCCTCGCGCTGGCCAAGTGCAAGCTGATGATTTACGACACCAGCATCCAGTACGCCTACGAGGAGTCCCTGCGCTACGAGGCCCACGAGCTGCTCCAGCAGAACGCCATCTACGACATCGGCCAG
HD3A1002	L09	HD3100641	probe	FBgn0033052	SREBP cleavage activating protein	SCAP	201	CGGCTTTTCTACGCCAATAA	GCATGACTAAGGCGAATGGT	CGGCTTTTCTACGCCAATAAAAGCTCCTCTAGCGATCGATATAAACGAAACGGCCGAGGAAATGATGAGACTTCGATATCCCAGCTTCGACCTAAACTATTTCCTTTCAAACTTCCACTGGTCCACGATTATGAAACAGTACAACATCTCACTAAGTGGGCACTACGTTACCCTGCTACCGACCATTCGCCTTAGTCATGC
HD3A1002	L10	HD3100737	probe	FBgn0262103	Salt-inducible kinase 3	Sik3	223	GAACTGCGCGACAAAAGAA	ATATCTTGCTGGTCGATGGC	GAACTGCGCGACAAAAGAAAATGCATATTAAGTGAATTTCCTGTGCGCGAAAAGCCAATTACGCATCCGCAAGAATCCTCATCCTCCTACGGCAAAAAGAGAAAAAGGGAATACACCGACGCAGCTGCGACGATGGCCACCACACCAACGGCTGGGCCAGCAGCAGCTCCTCCAACGTCCTCAACGCCGCAGAACTACAAGGTGCCATCGACCAGCAAGATAT
HD3A1002	L11	HD3100642	probe	FBgn0004855	RNA polymerase II 15kD subunit	RpII15	207	TAGCCATGACGACTGCCTTT	CGTCGATCTCGTGCATAATC	TAGCCATGACGACTGCCTTTGATGCCGCACACACTGAGGGGCCGGGATTCGTGGGCATTCGGTTCTGCCAGGAGTGCAACAACATGCTGTACCCCAAGGAGGACAAGGAGAACAAGATCCTGCTGTACGCCTGCCGGAATTGCGATTACAAACAGGAGGCGGACTCCAACTGCATCTACGTGAACAAGATTATGCACGAGATCGACG
HD3A1002	L12	HD3100738	probe	FBgn0032929	Sensitized chromosome inheritance modifier 19	Mcm10	203	AATGAAATGGGTCCTGCTCA	TCGAAGGTGAAGGCATTAGC	AATGAAATGGGTCCTGCTCAGAAATCCGGAACAGATATTAGTATCGATGATGAGGAGGAAATACTGGCTCTGGAAAAACTACTGGGTGCAGCAGAAAACGAAAATACAAAATCTGCAGAGTCAGAAAAAGCAAAACCCACCGCACCCATTTTGGTGCCAAAACTACGAGAAGACAACAGTTTTGCTAATGCCTTCACCTTCGA
HD3A1002	L13	HD3100643	probe	FBgn0026417	Hus1-like	Hus1-like	211	GATTCAAGGAAAGCCTCGG	CACCTGAATACATCAAGTCGC	GATTCAAGGAAAGCCTCGGCCTTCTTTGGAGCACTTCAACTCCCTAACGAAGAACTGACTATTGGCATTGACCGTGAGCATTCCATCCATCTGCAGATCGATGTACGACAGGATGTGGTTCTGCACTCTATTCTGCCAGCTGTTTGTATGTAGCCTAAGAGCTGGTATGTTTATCATAGCTGTAATAAATGCGACTTGATGTATTCAGGTG
HD3A1002	L14	HD3100739	probe	FBgn0020510	Abelson interacting protein	Abi	215	AGCGATTTCTGTTTGCCTTG	CTTTGCTGGCAATTCCATTT	AGCGATTTCTGTTTGCCTTGCGCTTTGATATGCCCGGCTATTATACACCAATACTACCCGAACCTATGCCCCCAGCAATACTGTAGGTTATATAAATTTCAGTTAGCATTTAATACTTAAGTATTGGCCAGTTGGAACTTTTGTTTATACTTTTACGAACCGCAACGATGTCTTTTTTTTGCGAACGTTTAGTTAAAATGGAATTGCCAGCAAAG
HD3A1002	L15	HD3100644	probe	FBgn0002716	meiotic W68	mei-W68	202	GACGTTCTGGACAGCAGCTT	AGCAATCGGGGTATCCTTTT	GACGTTCTGGACAGCAGCTTGTATGGTGGACCTCTGACATTGCCCACGGATCCCGAGAAGATAGATCGAATCGAAACGCTGGCGGAATTTGTGCTAATCGTTGAAAAGGAGTCGGTTTTTGAGAGTCTCTTATCCAGAAATGTATTTGGTACTTTTGAACGACGCTTCATCCTTATAACTGGAAAAGGATACCCCGATTGCT
HD3A1002	L16	HD3100740	probe	FBgn0030891	diskette	dik	201	TTTCCTCGAGTTTTGGCATT	AACGCTACTCTCCGCCACT	TTTCCTCGAGTTTTGGCATTCGTTTTCCCCAAATCGAACGCCACTTTTGAGTCGTTTTCGACTAGCTTCCAAACCCGTATTCTTATCTTCGTCACCAGACTGTACATTAACAAAGATACATTAGCTCATAGAATGTAGTGTTCAAGATTAAAGTGAAATTAATTATTTAGATAAGATCTTCAAGTGGCGGAGAGTAGCGTT
HD3A1002	L17	HD3100645	probe	FBgn0032924	Nibbler	Nbr	223	GCTGGCCTCTGTTATACCCA	ATATCCTGCTCGCAGTCACA	GCTGGCCTCTGTTATACCCATGCTCCTTTTGATGGATAGCGATTATCACGAAGACGACAAAGGCGTTCGCCCAACATTTATTAAGTGCAAATGTTATATGTAGTTGCAAAGAGTATTTAACATATATTTAGTGACTAGCCAGGCAGCTGGGTTAGTGCCGAGTTAGGCAGTTTGTACACATGTTACAAATCAGAAGGAAACTATGTGACTGCGAGCAGGATAT
HD3A1002	L18	HD3100741	probe	FBgn0014388	sprouty	sty	202	CGTTAAGTGGTGTCGACCAT	AAGGTCAGGTGGTGGATCTG	CGTTAAGTGGTGTCGACCATAACGCAGGAGCAACTGCATCCGCACTAGCATCAGGAGCATCATCTGCAGCACCCGTAGCAATCCATAACAACAATTCACAGCAGCAACTTAGTATTAGCGCCGCCGCGAGCAACAACAATACGATATCGATAATACCCGCATCGCCGGACTTCGACGACTACCAGATCCACCACCTGACCTT
HD3A1002	L19	HD3100646	probe	FBgn0001990	weckle	wek	218	CGAACCAGACGACAATGCTA	AGGTCTTCAAACCCTTTCCG	CGAACCAGACGACAATGCTAAATCCAAACAAGATGACAAGACATCCGAATTGAGCATGTCACCCCATGGCTCCCAGAGTTCGAATTTCGTCGATTATCCCTGCAAAATCTGCAACGAAACCTTTATGTCCTTCATGGCTCTGCGCAGGCACAAGCACGACATGCACGGCGGTCCGAAGAAATACGTTTGCGATCACTGCGGAAAGGGTTTGAAGACCT
HD3A1002	L20	HD3100742	probe	FBgn0263237	Cyclin-dependent kinase 7	Cdk7	201	TACGTTGTTCACCGCAGACA	TCGCTTTCAATCACATCTTTAAT	TACGTTGTTCACCGCAGACATGCACAATAAGTTCTATTGAAAGGCTTAAGGATGCATTGCATCCACTCCAAAAGCTCCACTCCATTCTAATTGATATGAATTTTTCTCGCTTGGCAAAACCTTTTCGCCACCCAACATGAGTTGTTAAGACTATGCTTAAGATGATTGAGGATGATCTATTAAAGATGTGATTGAAAGCGA
HD3A1002	L21	HD3100647	probe	FBgn0086347	Myosin 31DF	Myo31DF	202	GAAGCCTACAACGGAAGCAT	TAATGGTGCGTTTCATGTCC	GAAGCCTACAACGGAAGCATAAAGAACATAAGGAACCACCCCGCCGACGGCGAGACCTTCCAGCAAGTGCTCTTCTCCTCATTCGTCAAGAAGTTCAACCATTTCAACAAGCAGGCTAATCGCGCCTTCATCGTTTCCGATTCGACCATCCACAAACTGGACGGTATCAAGAATAAATTTAAGGACATGAAACGCACCATTA
HD3A1002	L22	HD3100743	probe	FBgn0031456	Transportin-Serine/Arginine rich	Trn-SR	222	GCGGTCAAGAGATCCTCACA	CTTCCAGCCCAATGTCTTGT	GCGGTCAAGAGATCCTCACAGAATTTAGCAGTAAGTTATTTACATCAGCGTGCACTCCTAGCTCTAAGTTTAAAACCTAAAATGACTCACAAACAAGCATAGGCATAAGGCAAACCATTAAATATATACCATTTAGATATAATTGACCACATTTGTTCTGCAAAACACTTGAGTATAATATTTATTTATTGAAAAAGCAATCACAAGACATTGGGCTGGAAG
HD3A1002	L23	HD3100648	probe	FBgn0003206	Ras oncogene at 64B	Ras64B	203	AAGCCCAGAACGTTTGTTTC	TAGTACAAAAATGCCGTGGG	AAGCCCAGAACGTTTGTTTCGATTAAGCCAAAACGTAATAATGTGTTATTGTAATTTGTATTGTTATTTACTACTAATATATACGTATACATATATTAACTGCTTACAAACCGATTTTGTTGTAACAAATTGAGTGCCTCGTTCTCGCGCGTAGAAATCTAAAACATCAAACTCTGTATTACACCCACGGCATTTTTGTACTA
HD3A1002	L24	HD3100744	probe	FBgn0039544		CG12877	214	GAGGTGTGCATTCAGCTCAT	TTTTTCGCTGTCATCGCTT	GAGGTGTGCATTCAGCTCATCAAGTATTATCTGCGCAACAAAATCAGTTGAGCTGCTATCACGCACCATCGCAAGCATTCAGTTCAAAAGCATTACGTACATCTGTTAATATGTATATCATGCCCATCAAAAATCAAAGCCTTAGCCTTTAAGCTAACCATATTATGTAAAATCAAACTGTATAAATATATCACCAAGCGATGACAGCGAAAAA
HD3A1002	M01	HD3100457	probe	FBgn0034503	Mediator complex subunit 8	MED8	220	CGGTCACACTTTCCACTTTG	GGCAAAGTTGTCCAGGAAAG	CGGTCACACTTTCCACTTTGTGTCCATCCGACTGAAGTTAAAAATAATAGTTTAATTGGGAGTTTCCAAAATGCAGCGCGACGAAAAGCTTTTTGAGCTGACGCTGGATACGGTCCTTCAGCGTCTGAACGACCTGAAGCTGGCGGTTCTCTCGATGATCCAAAAACTTGAGCTAGAGTACGAGACCATCAACTGGCCGACTTTCCTGGACAACTTTGCC
HD3A1002	M02	HD3100553	empty
HD3A1002	M03	HD3100458	probe	FBgn0000618	enhancer of yellow 2	e(y)2	204	ATCCTGATGGAGAAGGGCAC	TACAAATCCAATGACGCTGAG	ATCCTGATGGAGAAGGGCACCAACAACAGCTTCACCGTAGAGCAGCTGATCGCCGAGGTAACACCCAAGGCACGCACCCTGGTCCCGGATGCCGTCAAAAAGGAGCTGCTTATGAAGATACGCACCATTCTCACGGAAATTGAGGAGGAACCCGATGAGCCAGAGGACGAATCCTAACTTTAACTCAGCGTCATTGGATTTGTA
HD3A1002	M04	HD3100554	probe	FBgn0051365		CG31365	209	ATACCGACCCCGCAAATAAT	GTTGTCCTGGTCAAATTCGG	ATACCGACCCCGCAAATAATAGCGATGTAAACATAGATGGCCTCGAACTGGACGAGGAAGTGCCCGCGGAAAGCGGTGAAGACTTCAGGGAAATCAACATGGTTGGATCAGATGTAGTGCACACAGACAATGGAGAGATTTACATCATAAACTCTGCCAGCTCAGAGGATCAAAACCAGGACTCCACTCCCGAATTTGACCAGGACAAC
HD3A1002	M05	HD3100459	probe	FBgn0003654	short wing	sw	225	TTCGGAATCCCGCTAAGAAT	TGTCTTTACTCGTTGTTCGGC	TTCGGAATCCCGCTAAGAATCCTAGTCTTCCACACCCTTTGGGCATCTATGTAAACCAGCCGCGCCCATTATCTCCTTCGTGTGCCAATAACTGTGCGAAGTAACTGGCCGTGGGCGATGTTCCATCTCTAGTTAGTCAAAACATTAAAAGTCAGTCGCATTTTTACATTGTTGAAAAATGATGATTTAAGTACTTAAAAAGCAGCCGAACAACGAGTAAAGACA
HD3A1002	M06	HD3100555	probe	FBgn0000405	Cyclin B	CycB	208	GTGAAAAAGGATGCGACCAG	GCTCCAGCTCCACCTGATAC	GTGAAAAAGGATGCGACCAGGATGCCCCTTATTAGGGGCAACAGTGCAGTCACTACGACCACATCTACGATGCCCACCACCATGTCCCTTTCCAGCAAGCGCTTGGCTGGAATCGAGGACATTGATGCCAATGACAAGGAGAACCTGGTACTGGTCTCCGAATATGTAAACGACATCTACGACTACTTGTATCAGGTGGAGCTGGAGC
HD3A1002	M07	HD3100460	probe	FBgn0031635	tank	tank	220	GTGCATCTGTGCCTGCTCTA	CATTGCCGCTGAGTATGAAC	GTGCATCTGTGCCTGCTCTACTCACTGTACTCCTTCGAGTACAAGTGGTTCAACATGGGCTGGGAGCTACATAGACGACTCACGTACATTGAAAAGAACTGGCCCTATTTCTTCGGCTTCGGAATACCGCTCACCGTGCTGACAAATCTGTCCAGCTCGGTGATCGTCAGTAGCTGCATCTTCTCCATCTTTTTTCCCCTGTTCATACTCAGCGGCAATG
HD3A1002	M08	HD3100556	probe	FBgn0034299		CG5757	204	CCGACCTCTGGACACGTTAT	AATGCATTTCGCTCAACACC	CCGACCTCTGGACACGTTATCGTAGCACACGTCCTCGCGTCGCCATTCATTAGAGGGGATTTACATTGATTTATGCAATACACGAATGTTTGTTATAAATGTTTTAAATGCCGCTTAACTTTTAATTTACGATAAAGCCGCAGGCAATAAATCCTAGCATCGGGCGATTGGAAGGATATCGTTAGGTGTTGAGCGAAATGCATT
HD3A1002	M09	HD3100461	control_th	FBgn0260635	thread	th	173	CGGTGAAGGTCTTTAATCGC	ACAACCAGAACACAAAATGGC	CGGTGAAGGTCTTTAATCGCGTCTCCTCGCGGTTTAAATCGTTCATTCTGGTTTTGTTTATATTATTTTTGAATAGCTGGGTCGCGTTCGTGTTGTTATCCACCTGATCAAAAGCGATAGGTCCATAAGACGGAAGATCAGCTACAACAGATGCCATTTTGTGTTCTGGTTGT
HD3A1002	M10	HD3100557	control_th	FBgn0260635	thread	th	173	CGGTGAAGGTCTTTAATCGC	ACAACCAGAACACAAAATGGC	CGGTGAAGGTCTTTAATCGCGTCTCCTCGCGGTTTAAATCGTTCATTCTGGTTTTGTTTATATTATTTTTGAATAGCTGGGTCGCGTTCGTGTTGTTATCCACCTGATCAAAAGCGATAGGTCCATAAGACGGAAGATCAGCTACAACAGATGCCATTTTGTGTTCTGGTTGT
HD3A1002	M11	HD3100462	probe	FBgn0000146	aubergine	aub	204	TACACGACTGCGACGGTCT	GCATCCGTAGATTGCACAGA	TACACGACTGCGACGGTCTTTCTTGTATGAACATAAAGGGATCCTGGGCGGCTACATCTTTGACGGAACCAATATGTTTTGCATCAATCAGTTCAAAGCTGTTCAAGATAGCCCCTATGTTTTGGAACTGGTTACGAAGAGTCGTGCTGGCGAAAACATTGAAATTAAGATCAAGGCTGTTGGATCTGTGCAATCTACGGATGC
HD3A1002	M12	HD3100558	probe	FBgn0004432	Cyclophilin 1	Cyp1	206	GAATGGAACGCACGGAAC	CAAACTGCAACTGACCCCTA	GAATGGAACGCACGGAACGATATCGTAGTATCGTACATGCGGTCGCAAGCCATACACGATGGTCTCTTTTTGTGCAACTCTGATTCGACAGTTTCGGCACAGGTCGGCAGCGGCATTTCAGATTGCGGAGTCCGCCATTTTAGCTAACAAATCTATAACCCTAGCTTCGTCAGCGTGCAGTGTGAATAGGGGTCAGTTGCAGTTTG
HD3A1002	M13	HD3100463	probe	FBgn0030878		CG6769	208	ATTGTGTGTGGATGGTGCC	AGTTCAGGCAGGTGAAGTGC	ATTGTGTGTGGATGGTGCCGACGTGAGTGCCGTCTGGTCACACTGTCAAGAACGTGGTTTTGTTTTTTAATCATCACCATTAAATTGAGCAGCCTTACTTTCCATTGTGAAATACGCCATTCCAGAGTGCCAACGAAAACGAGAGTGCCAGTCAAGCGATCATCGAATCCACTCAGCGCCACAATGTCGCACTTCACCTGCCTGAACT
HD3A1002	M14	HD3100559	probe	FBgn0039731	Spindle assembly abnormal 6 ortholog (C. elegans)	Sas-6	203	CACACGGGATCAGAACCTTT	TTTGCTGCATACTTTGCTCG	CACACGGGATCAGAACCTTTCATCCGGCAGGGAGGTCCACGACTATTATCTTCAGTTTGTTGAAATTCGGTCCTTTAAGAACCTAGTTCACCTTAGCCTGCCTTGTCGTTCTGCTCCCTTGAACACCGTACTCTTCTACATAAACAGCATGCTGGAAGCCTCCCACAAAAAGCAATATATTCTCGAGCAAAGTATGCAGCAAA
HD3A1002	M15	HD3100464	probe	FBgn0264325	Autophagy-specific gene 6	Atg6	206	ACTGGCGCGAGTATACCAAG	GGATACAGAGGGCAATCGAC	ACTGGCGCGAGTATACCAAGCACAGGCGTGAGCTAATGCTCACCGAGGATGACAAACGAAGTCTGGAGTGTCAGATCGCCTACTCGAAACAGCAGCTGGACAAACTGCGCGACACCAACATATTCAACATCACCTTTCACATCTGGCATGCCGGGCATTTCGGTACCATTAATAACTTTAGGCTGGGTCGATTGCCCTCTGTATCC
HD3A1002	M16	HD3100560	probe	FBgn0263979	Chromatin assembly factor 1 subunit	Caf1	222	TCGACAATCTTTAGCATTGCAT	GCAAAACGTGTGCAGAAAAA	TCGACAATCTTTAGCATTGCATCTCTATCATCGACGACGCGCTTGCAAAAAAACGAAGGAAATTAGCCAATTTCTATTTTGCCCTGACGTTACGCCGTTTAAAGTGTAAGTTCCCGGCCAGGATTCGACTCAATCCCTGCCACAACGACTTTCGGTCAAGTGTTCGTTGCGAGAGCTTTAACTACGTAGCGAACTTTCGTAGTTTTTCTGCACACGTTTTGC
HD3A1002	M17	HD3100465	probe	FBgn0050273		CG30273	84	AACCAAATCGAACCGATCAA	ACCTGACCAAAAATGTTCGC	AACCAAATCGAACCGATCAACGCTCACAACCTCAACACACCCACACACAAAATCATCCACGAATGCGAACATTTTTGGTCAGGT
HD3A1002	M18	HD3100561	probe	FBgn0033994		CG7544	202	GAATCGAAACCGCAAAACAT	CGCCTAAGGGATTTGGTAAG	GAATCGAAACCGCAAAACATAGAATACGCCAAGGAGAATGTAAAGAGAAATCACATGGAAAGCCTTATAGAAGTCTATGCTCAACCAGACAACACGAACATCTTTAAGAGCTATTTTGAGCAGGATCAGCAACAGTTGCAGTATCAATTTTGCCTGTGCAATCCACCCTTCTTCGACTCGAACTTACCAAATCCCTTAGGCG
HD3A1002	M19	HD3100466	probe	FBgn0261286	Maternal transcript 89Ba	Mat89Ba	225	GACGGTCTGCTCGTACTCAA	CAGCACAGTGGAACCAAATG	GACGGTCTGCTCGTACTCAAGCAAGGTTACTGCTTCCTTATAGAGCTGGCACACAACAAGGAGCTGGCGCTGCTGAAGCAGGAAGTTACTGAGCGTGGCATAACTACATATATAGACAATGCAGCCAGTCGTTCCTTAGAGCGTCAACATTATATTCTACCCAAAGTAAGTGGGGCTCTACATTCGCTTCATCAAACTTACAGCGCATTTGGTTCCACTGTGCTG
HD3A1002	M20	HD3100562	probe	FBgn0031711		CG6907	203	CCTACCCAGAACTTGCGAAT	CGGAAACTGGTCATCTTCGT	CCTACCCAGAACTTGCGAATTAACAGCTGTTTTGACTATCGATACACAATTGGAGAGTGTGCCCCCATTGGCAGCCATCGAGAATAGATAATATCGAAAGTATCGAAATAGAAGTTTACGCGAAGAGAAGGAAACACATAGCAAAAAAGAACGCAAAAAATAAAGGTTAGCGAAATCTGTGCGACGAAGATGACCAGTTTCCG
HD3A1002	M21	HD3100467	probe	FBgn0036918		CG7770	202	ATTTGGGCACACTGCACG	ATTTTTGCAGGTTCTGGTACG	ATTTGGGCACACTGCACGGTTTATTCACATGCAAAAGACGAAATTTAGTTAAAATTATTAGCAACCGGTGAAGCAACTGTTTCATTAAACACCCTATTCCGAACAAACACCTGCTGTATCTAAACCAAAATGGACAAGAAGAGCGCAGCGTTGTACAAAAAGATGCAGGCCGAGATTGAGTCGTACCAGAACCTGCAAAAAT
HD3A1002	M22	HD3100563	probe	FBgn0031947		CG7154	222	CGCCCGGTTACTCTTCAATA	TCATGAGGTTCTCAGGTTGC	CGCCCGGTTACTCTTCAATAATCAGCAGACCCATGGACTTCTCCACTATGCGACAGAAAATTGATGATCACGAGTATACCGCTTTAACCGAGTTCACTGATGACTTTAAGCTGATGTGCGAAAATGCCATCAAGTACAACCACGTGGATACGGTTTATAACAAGGCAGCTAAACGTCTACTCCAAGTTGGAATGAAACATCTGCAACCTGAGAACCTCATGA
HD3A1002	M23	HD3100468	probe	FBgn0003977	virilizer	vir	221	CTGGACACCAGGATGGGTAT	ATTTGATCGCGATTACCAGG	CTGGACACCAGGATGGGTATCGAACACTTTATGGGAGCGAAGAACAACGGCTATCAGATGATTGTTGAAGCCATCAAGACAGCCAAGCTGACCAGGACGAAGTACGCACTGCAGGCGATTATAAAGAAGCTGCATTTGTGGGAAGGCCTGGAGAGTGTACAGATCTGGTGCCGTCGTCTCTTCGTGGACCGAATAATCATACCTGGTAATCGCGATCAAAT
HD3A1002	M24	HD3100564	probe	FBgn0038167	lkb1	lkb1	202	CGACCAGTGTGACCGTATTG	CGCCCGTCGTCTATTCTG	CGACCAGTGTGACCGTATTGCGGCGAACTTACTTTGGCCAAAAACTAATTGTTAAACAATTTTTCGGAAGGGGAAAAGAACAAATTGAACGGCGAGAGTAAACACAGGAATTCACAAATTTCTATGAGAAACAGATCGCACGACGGTGAAACGAAAGGGGGGAACGCCTTTCCAGCGGACATCGCAGAATAGACGACGGGCG
HD3A1002	N01	HD3100649	probe	FBgn0040298	Myt1	Myt1	201	GTTCCGACGCAAAAAGCTC	GGAACTTCGTACAACACTACGG	GTTCCGACGCAAAAAGCTCTTCGTCCTGGAATATGACGACGAGTGAGTGAGTACGGTGCCAGCGAGCAACGTAAACCGAATGAATTTATGATAAACCCAATATATATCAGTTACGAAACGAATACCAGATACATATGGCAACAGAATATATCGTTAATTGTATTTTGATTAGTTCTAGACCGTAGTGTTGTACGAAGTTCC
HD3A1002	N02	HD3100745	empty
HD3A1002	N03	HD3100650	probe	FBgn0265605	Ras-related protein interacting with calmodulin	Ric	201	GCTGCACTGCGTCATTACAT	CCGCCTCCTGGTCTAGTTAAG	GCTGCACTGCGTCATTACATCGACGAGGCATTCTACACGTTGGTCCGCGAGATTCGACGCAAGGAAATGCACAAGGCCCTGGGCACGGACTCCAATTCGGAAAAGATTCACACGGGGCGACGAAGTCGCTGGTGGCGCATCCGATCCATTTTCGCATTGGTTTTCCGGCGCAGACGAAACCTTAACTAGACCAGGAGGCGG
HD3A1002	N04	HD3100746	probe	FBgn0000541	Enhancer of bithorax	E(bx)	203	GCTGAATCTCCTCAGCCAAC	ACGCCAAGAGCTCCATTAGT	GCTGAATCTCCTCAGCCAACCGAGCCACAAATTACCGAGGAATGGGTCGACGAAGATAAATTGGAGTTATGGGAAATTAAATTTATGGGAGAAAAACAAGAAAAGGCACGCCTATCAGCTGTTACGCGATCTGTAGCATCCCGTCAATTGGAGGCAAGTGGTAGTAATGGTTCCAACACTTCAACTAATGGAGCTCTTGGCGT
HD3A1002	N05	HD3100651	probe	FBgn0040078	pontin	pont	222	ACTCGCACGGTCACACTGTA	CTCTAAATCCGTGTCCTGCC	ACTCGCACGGTCACACTGTAAACAACGGCTGCGGAAACAAAGTGTGCTTCTAATTTCCAATCAAAACGCCGGCAGAAAAACAAATTTTATCCACGGCAACGAAACAATAGTTTGTTTGATCGTTGCAACGCTTGACTTCACATTTCCTCTCCCTCGGGCGAAAAACAGCTGAAACCGGAAACGGATCAGAGTATTAGCATCAGGCAGGACACGGATTTAGAG
HD3A1002	N06	HD3100747	probe	FBgn0035194	Psf1	Psf1	203	CTGGCCTACCTATACGAGCG	GGACGCAGATTGTTGGTTAGA	CTGGCCTACCTATACGAGCGGTGCAGGAGGATCAAGGCCCTCAGGTGGGAGTTTGGACCCATTATCCCCGGGGACATCAAGCAGGCACTCTGCGAACCGGAGGTCACCTTCTTCAACAACTACTCCAAGTCCCTGGCTGCCTACATGTGCAGTGCGGGCTACAACCAGGGCTTGCCCATTGATCTAACCAACAATCTGCGTCC
HD3A1002	N07	HD3100652	probe	FBgn0035532		CG15014	205	CGAAAATGGGTAAAAACGTGA	TTTTCCGGTTCATTCTCTGG	CGAAAATGGGTAAAAACGTGAAGTTTAACAACAACAAGAAGAAGTATTTCCACGCCAAGAGGCAGACGCTCCAACCTGGGCAACGTGGATTCTTCGCCACGTGCAACATCAACGAGAAGGCATGTGTTCGCGAATGCTACAATTTGTTGAACCACTATGCTGACATACTTTACGGTTCGGAAAAGCCAGAGAATGAACCGGAAAA
HD3A1002	N08	HD3100748	probe	FBgn0038869		CG3353	204	GACGACACACATCCCATCAA	GCCCAGCATTTTGTGATAGA	GACGACACACATCCCATCAATGTACTGAATGAGACTTGGAAAAAGATGCACTATCCGCCCGAGACGGGTAGCATAATGCTGATTGTCCGCCTGATGGCTCTTTACCAGCAGAGCACCAAGAAGGAGGAGTTCCTCGAGCAATTGCAGTCCTTCCAGTCGCTGATTGTGAATCGCGAGCAGAAGATCTATCACAAAATGCTGGGC
HD3A1002	N09	HD3100653	control_th	FBgn0260635	thread	th	173	CGGTGAAGGTCTTTAATCGC	ACAACCAGAACACAAAATGGC	CGGTGAAGGTCTTTAATCGCGTCTCCTCGCGGTTTAAATCGTTCATTCTGGTTTTGTTTATATTATTTTTGAATAGCTGGGTCGCGTTCGTGTTGTTATCCACCTGATCAAAAGCGATAGGTCCATAAGACGGAAGATCAGCTACAACAGATGCCATTTTGTGTTCTGGTTGT
HD3A1002	N10	HD3100749	control_th	FBgn0260635	thread	th	173	CGGTGAAGGTCTTTAATCGC	ACAACCAGAACACAAAATGGC	CGGTGAAGGTCTTTAATCGCGTCTCCTCGCGGTTTAAATCGTTCATTCTGGTTTTGTTTATATTATTTTTGAATAGCTGGGTCGCGTTCGTGTTGTTATCCACCTGATCAAAAGCGATAGGTCCATAAGACGGAAGATCAGCTACAACAGATGCCATTTTGTGTTCTGGTTGT
HD3A1002	N11	HD3100654	probe	FBgn0037555	transcriptional Adaptor 2b	Ada2b	201	CCCTTCGATTAAGAGCCACA	CCGACATCTCACACAAAGGA	CCCTTCGATTAAGAGCCACATGCATTTCCAAGGACTTCACTTTATTTTTGTATTAGTTAGAATAGGTTAAAGACATTTTTATACTGTTCAACTGTCGTTGGCATTTTCATCAAGGTAAAAACTACAAAACTGAAAATCAATTTACTTGTATCAAGTCAAGCTCAATTACAATAAGTGTTGTTCCTTTGTGTGAGATGTCGG
HD3A1002	N12	HD3100750	probe	FBgn0016696	Pitslre	Pitslre	95	CACGCTGAATTTCACATTTCC	TTTTTCGGTGGTATCTCACG	CACGCTGAATTTCACATTTCCACCACAAGAAAAAAGAAGAGAAGAAAGAAACGCAGACGACCTTTTGCTGAAGTGCGTGAGATACCACCGAAAAA
HD3A1002	N13	HD3100655	probe	FBgn0028690	Regulatory particle non-ATPase 5	Rpn5	215	CAGATGCGCCTTTGTCTGT	GTAAGGCCAGTCTTCTTGCG	CAGATGCGCCTTTGTCTGTTGAAGGAGGATTACGTATCCACGCAGATCATTGCCAAGAAGATCAGTATAAAGTTCTTTGACGATCCGGCACAGCATGATCTGAAGCTGAAGTTCTACTATCTAATGATTCAGTTGAACAGAGACACCTCCTTCCTGAATACTTCGCGCCATTATCAGGCCATAGCGGAGCCTCCGCGCAAGAAGACTGGCCTTAC
HD3A1002	N14	HD3100751	probe	FBgn0011648	Mothers against dpp	Mad	210	GTCTACGCCGAATGCCTATC	GATCGTGCACATCTTTGTCAG	GTCTACGCCGAATGCCTATCCGACTCCGCCATTTTCGTGCAGTCGCGCAACTGCAACTACCACCACGGATTCCATCCGAGCACCGTGTGCAAAATACCGCCGGGCTGCTCGCTGAAGATCTTCAACAATCAGGAATTTGCTCAGCTGCTGTCGCAGTCGGTGAACAATGGATTCGAGGCCGTCTACGAGCTGACAAAGATGTGCACGATC
HD3A1002	N15	HD3100656	probe	FBgn0015391	gluon	glu	204	GGAGAAGGTCAACACGGCTA	CTGGCAATTTCGGTCTTCAT	GGAGAAGGTCAACACGGCTAAAGGAGAGGTTCAAGTGTTCGAGTCGCAGCTCAAGATCCTTAAACAGGCAGAGACCACTGAGTCTAGGAAATATGAAACCCTAAAAAGTTCGTACGAGCAGTCGCAGAAAAGTCTGGAGGAGAAAGTAACAAGGGTGGACGAGCTGAAAGAAAGCATTCCACGGATGAAGACCGAAATTGCCAG
HD3A1002	N16	HD3100752	probe	FBgn0036581	Mediator complex subunit 10	MED10	206	GCAGGACGTCTATGTGCCA	CGCGGTAGTTGTTCATCTCA	GCAGGACGTCTATGTGCCATTTGAAGTGTTTTTTGACTACATCGACCAAGACAAGAATCCTCAGCTGTACACCAAGGATTGCGTGGAGAAGGCACTGGCCAAGAACGAGGAGGTCAAGGGCAAGATCGAGGGCCTGAAGAAGTTCAAAACGAATCTGCTGCTGGAGCTGTATAAAACATTTCCCAATGAGATGAACAACTACCGCG
HD3A1002	N17	HD3100657	probe	FBgn0037561		CG9630	201	CATGCCGGAGCTAAAGAACT	GCCTTCTTTGTCTGATCCCA	CATGCCGGAGCTAAAGAACTACCAGGGCGGCGGCTATGTGGCGCCTGCTTTTGAAGTGGATTTATCCAAACTTACCTACAAAAACGCCCAGAAAGAACAAGTCCGGCAAAAGAAAATGGAAACTTACGAGCAAACGGGAAGCTGGCCGGGCCAAAAGCAGCACAAAAAGCGTGTTGAGTCCTGGGATCAGACAAAGAAGGC
HD3A1002	N18	HD3100753	probe	FBgn0016131	Cyclin-dependent kinase 4	Cdk4	87	TGTGAAACGATTCTCGAGGG	TTTTGAAATTGTATAATGCATTCCTG	TGTGAAACGATTCTCGAGGGCGTTTGAAGGCCCTCCAAATCGAAATGTGATACACAAAGTTCAGGAATGCATTATACAATTTCAAAA
HD3A1002	N19	HD3100658	probe	FBgn0086445	lethal (2) 37Cd	l(2)37Cd	218	AGGCAGACTCCCAAAACCTT	GCCGAAGCGAACATACAAAG	AGGCAGACTCCCAAAACCTTAAACGACTCAAGGTCAAGTACGTTTCGGATGAGCAGCTGGCATTGGTCAAAAAACTTTTCGATGACTGCCCAATTTGGACCCGAATCGCGCTGCAATATGAATCGGGTTTGACCAACGACAAACTCAAGTGCATCACTCCATCGCTGGCATTTTACTTTAGCAACGGCCCGTGGCGCACTTTGTATGTTCGCTTCGGC
HD3A1002	N20	HD3100754	probe	FBgn0032194		CG4901	221	GGGAAATAAGCGAGCACTTG	CTGCACAATTTCGGTGAAGA	GGGAAATAAGCGAGCACTTGCATTTGGCTCTAAATAGCTCGGATGACATTGAAATGTTGAAGAAATGCATTTTAAATGGATTCTTTGAAAATATTGCCGTTCTGCAACGCGATGGCTTCTACATAACCGCTTCCGGCAACATCAGGTCCAAAATCCATCCGTCGAGCGTTCTGCACGGAAAGTACAAGCCGAGCTACATACTCTTCACCGAAATTGTGCAG
HD3A1002	N21	HD3100659	probe	FBgn0261573	CoRest	CoRest	201	AGTACATTTCGGTGGCCAAG	GGATGCGGTGGAAGCTCT	AGTACATTTCGGTGGCCAAGGAAAAGTACGGCTACAACGGCGAACAGGCATTGGGCATGCTGTTCTGGCACAAACACGATCTGGAGCGTGCCGTAATGGACCTGGCCAACTTCACGCCCTTCCCGGACGAGTGGACCATCGAGGACAAGGTGCTGTTCGAACAGGCCTTCCAGTTCCACGGGAAGAGCTTCCACCGCATCC
HD3A1002	N22	HD3100755	probe	FBgn0040929		CG12659	203	GATGCCTTTGGATGCCTACT	CGCTCCATGTTGCTTATCTG	GATGCCTTTGGATGCCTACTACTCTCGATAGACTCACCGTGGCATAAGTTGCCATCTCTAAATTTCTGGCCATCTCAATTGCAAGCTTGAAACGTGTGAAATATGGAACAAAATGCGAAGCCTAAACGCTCCTTTAAGCGTCCGTTTACCTTTCCAAAGAACTGTGTTTACCGCCCTCTACGTCAGATAAGCAACATGGAGCG
HD3A1002	N23	HD3100660	probe	FBgn0023181	Origin recognition complex subunit 4	Orc4	213	GAGGGCGACGACAAGATAGA	GATGCGTAAATGCTCGAAGG	GAGGGCGACGACAAGATAGAGCTGCTTTGCGGGCTCTCAGTCCTAGAGCTGTGCCTGATCATCGCCATCAAGCACCATTCGCAGATTTACGATCGCGATTCCTTCAACTTCGAGATCATTTACGCGCGCTTTTCCAAGTTTGCCAAAGTGTCCACCACAATGCAGGCCGTGGAGCGGTCCATTGTCCTGAAGGCCTTCGAGCATTTACGCATC
HD3A1002	N24	HD3100756	probe	FBgn0017550	Regena	Rga	202	GATACCACGTGGAGGAGAAAA	TATACAGACTGTCCATTCATAAACGC	GATACCACGTGGAGGAGAAAATATGGATAACTCGAATTCCTGGCATTGATCAATATGAAAAAAATGGTACAAAAGAGCGCGGCACCTTCTACTACTTTGATGCGCAAAGTTGGAAACGTTTGTCCAAGGTTTTCCAAATAGATCCCGAGAAATTAGATAAATGTCCCAATATAAGTGCGTTTATGAATGGACAGTCTGTATA
HD3A1002	O01	HD3100469	probe	FBgn0021768	nudC	nudC	202	GCAAGACAGCAAAACCGTG	GGGAAGACCCAACTCCTTCT	GCAAGACAGCAAAACCGTGATGATCACTCTTGATAAGATCAATAAGATGAACTGGTGGAGCCGCCTGGTCACAACCGATCCAGAGATCTCGACGCGCAAGATCAATCCAGAGTCTTCCAAGCTTTCTGATCTGGATGGGGAGACTCGCAGTATGGTGGAGAAGATGATGTATGATCAGCGACAGAAGGAGTTGGGTCTTCCC
HD3A1002	O02	HD3100565	empty
HD3A1002	O03	HD3100470	probe	FBgn0037747		CG8481	201	CACCGATAAGCAACCATTCA	TGCACACACTTGAGCAAAACT	CACCGATAAGCAACCATTCATTCACCAAGCGCTTGTGTTGATTTTTAAATATTACTTTCCGCATGTATTTTTTAAACTTTTTGGTTCTTTTTGTATGACAAAAGTGATCCGGGCTGTTCGGTACATCTATAAGGCTAATGTTAACCTAATCCTAACTGTTTAGCAATTATGATTTGTTATAGTTTTGCTCAAGTGTGTGCA
HD3A1002	O04	HD3100566	probe	FBgn0003044	Polycomblike	Pcl	201	CTGGTGGGCATATGTTGAAA	ACTTCTAGTTTCGGTTGCCG	CTGGTGGGCATATGTTGAAAAATGGCTGACACAAATTAATTTTCAAGTGATTTGTTTTGTGCATTTTCGCTGGTGTTAAAGATGAACTTGGGACAACGACGTTCAAAGCCGATAGCCGAATCAATAAGAGCAAAATGCTAATTTAATGCACGATTCGAAACACACTTAAAGGTGGGTAAATCGGCAACCGAAACTAGAAGT
HD3A1002	O05	HD3100471	probe	FBgn0038055	toys are us	trus	209	CAATTCCATCGCAGCCTTTA	CCACTACACCAGCTGATAGCC	CAATTCCATCGCAGCCTTTACGTTTTTGGATGCATGAACCCAGTTTGCTCTCAGAATTCAAAGAGCTGGTGTTGTGTGCGCACTCAGCACCTGGACCACCAGTACGAGGTGATCAGTGAGCATTCGCCGAAGGCAACGCCAACTAAGAAGCAGAACTCCAAAAAAAAGGGGAAGTCGAGCGGATTGCAGGCTATCAGCTGGTGTAGTGG
HD3A1002	O06	HD3100567	probe	FBgn0010762	simjang	simj	208	ATTCTGCAGTGCGTGTAAAA	CTCGATTTTTCCAATTTCGC	ATTCTGCAGTGCGTGTAAAATATTTCGAAAAGTAGCCGCAAAAAGGCAGCGGCGTCGACGTCAGCAGAGCGCGGGCTGCAAGTGTGTTGGTGAGGCGTATATACATACATACCAACGCATAAGTGCATATATAAGGTGGTACATAAGCAGTGTAATTAATTAAGTGAAATCCAAATAGTTTTGTGCATGCGAAATTGGAAAAATCGAG
HD3A1002	O07	HD3100472	probe	FBgn0032884	Pomp	Pomp	89	GCATCGACACAAGTACCAGC	CTTTTAGAATAAAAATGCGGCG	GCATCGACACAAGTACCAGCTCTAATTCGCACGGAATTTGTTTGTCATTCAAGAAACAATTATAATTCGCCGCATTTTTATTCTAAAAG
HD3A1002	O08	HD3100568	probe	FBgn0011586	enhancer of rudimentary	e(r)	118	GGCGATGCGACAAGATACAT	GTTGCTATTGCACGCATTGT	GGCGATGCGACAAGATACATACATATAAAACCAAATAACACGATGATGCATGCATCAATGCGTGCAACACTAACGACAACAACACGTTGATGTATGCAACAATGCGTGCAATAGCAAC
HD3A1002	O09	HD3100473	probe	FBgn0037794		CG6254	205	GTCTTCCCCAGAATGACGAA	ATTTCCTCTTCCACCCCAGA	GTCTTCCCCAGAATGACGAAGTATTCATCAGCGAGGAACAACCAATAGTCTGCCAAACAGAAACATCCAGTAAAATGAAAAGTGAAATCCTAATGATACCAAATTTTTTGGTGGAAAAACAATGTCTTCAGGAAAAACAAGACTTTCCTAAAGAGGAAGATGTTATTGAAGAAGAAATGCAAATTTCTGGGGTGGAAGAGGAAAT
HD3A1002	O10	HD3100569	probe	FBgn0001961	Actin-related protein 2/3 complex, subunit 1	Arpc1	201	CCAGAGTCCGCGATTAAAAC	TGCCAAAGGTGTATGTCTCG	CCAGAGTCCGCGATTAAAACGAGAGCGAAGCTAAAATCCAGCGGAAACAACGCCCAATTGCTACACAGCGATATCCAAAATCCGAAAATCCGGCGAACCGAACCGAAGAAACTACGCGTGTGGTTGGATTTGGACGAGCGAACACTGCACATTCCGAGCGCATTTAGCCACCCACGATGGCCGAGACATACACCTTTGGCA
HD3A1002	O11	HD3100474	probe	FBgn0028402	Sex-lethal interactor	Sin	204	CACCTACAAACGTGGCATCA	TCCGTTTGAGCCTTCAGTTC	CACCTACAAACGTGGCATCATGGACAAACAGGCCTTCACAAGCTCGCGTTCCATAACCGATGTGGCCAAGTACATAGTGGGCATCTTTACGGATCGGGAGGTGCATCTGTCGCCACTTACATCCATAGTCCAAATGCGACCCGTTCTCAGTCACTTCGATAAGGACGACAAGCGCAAGAAGGCGGAACTGAAGGCTCAAACGGA
HD3A1002	O12	HD3100570	probe	FBgn0033183		CG1620	201	CACATCGCAACTGGAGAAAC	GCCAGATCGACGAAGGATT	CACATCGCAACTGGAGAAACACGACGGCATAGACCAGGAGGAGGAACCCAAGGAGGAGGCCGATAAGCTAGCATCACCCCCAGAATCAGGAGAAGCTTCGTCCGTGGACACGGAGGATGCGCAAAAGTATGAGGGGATCAAGAAGCAGCATCGCTCACATTTGCTGGACCTGTATCCAGATGAATCCTTCGTCGATCTGGC
HD3A1002	O13	HD3100475	probe	FBgn0029896		CG3168	218	AGAAGCTGCTGGAGAGCAAT	TGGGAATGCCTTCTCGTACT	AGAAGCTGCTGGAGAGCAATGGCAATGTGAAGAACAAATATAGCCGCATGATCAGCGGAATGGTTGACCACAGTCGCGCCCTGTTCAAGTCGCCCATACTGCGTTTCACTATCGTTTCGATTACGATCAACTTTACATTCCACATTGGCTACTATGGCCTGTTGATGTGGTTCCCGGAGCTCTTCAATCGCTTCGAGGAGTACGAGAAGGCATTCCCA
HD3A1002	O14	HD3100571	probe	FBgn0036973		Rbbp5	202	CGGATTCCATCTCCAAAATC	TGTACATATATGGGCGTCCG	CGGATTCCATCTCCAAAATCAAGTACAGGAAGGGAAAACTCGCCATTCTGCTGCTCATCAAAGACATTGTCACAGCTGCGACAGTGGTTCCCTCTTCATCGGCAATTATTTGGTAGTTTGTTTGCAGGAGTACATTTCCGGTGCCATTCGGTCCAGTTTGCCCTTTTTTATTGAACAAATATCGGACGCCCATATATGTACA
HD3A1002	O15	HD3100476	probe	FBgn0010379	Akt1	Akt1	214	CAGCACTCACACAGCCACTT	TTTTGCATAAAGCACAGCACA	CAGCACTCACACAGCCACTTAGCATATAGCGAACATGAAGTTTAGTTAACTTGACAGCAACAAATCGAAATACACATATTCAACAACCGCCCCCACATGCAACACTCGTATATATAAATTATTTATACTCCAAAGAAGCAAAAAAGAAACAGAAACAATTACAAGTTATATATAATGTTAAAATTGCCTCTAATGTGCTGTGCTTTATGCAAAA
HD3A1002	O16	HD3100572	probe	FBgn0263048		CG43343	202	CCTGGATTTGAGTTGCGAAT	ATCACCGAGAGCCTGAATTG	CCTGGATTTGAGTTGCGAATCTGAGCCACTACATTCGTCAAAACAAAATAGCCAGCTGATGGAAGATGCGGAGACAAATTTCACGGAGCGTTTAAAAGTGAATCAACTTAAAGAGCAGATTGATAAACAAGAAGCGGCCAATTTTAAAGCCCAAGAAAATCTTATAAAATCTATAAGACAAACAATTCAGGCTCTCGGTGAT
HD3A1002	O17	HD3100477	probe	FBgn0026575	hangover	hang	209	CCAACCACAACTACCAACCA	ACACACGCATCTCGTGCTAT	CCAACCACAACTACCAACCACACCTCATCATCTCAATGCAAAATCACTTGAAATGTACAAAGCCAATCCAATCAGACACCGCCATCATCCATCTCATCATACTCGTAATCATCATTCGAACAATGAATACATCAGCAGCCACATAAACATCAGCAACGCATTCCATCAACAAATCAGCCACGTTTATGTATAGCACGAGATGCGTGTGT
HD3A1002	O18	HD3100573	probe	FBgn0035766	eco	eco	215	CACGTCGGCGGATATAAACT	CAACTTCGGAAGATTTCGCT	CACGTCGGCGGATATAAACTGCAAGACGCTGAAGGCTGCTGCCCATCTACATGAGAACATGAGGTCGTATGATGAAGAAAAAACAGCAGCAGTTAAGCTAGAAAACAGCAGAAGCAGATCCAAGTCCCCGGTAGAAGTGTTCAAGTCAAATGACGATGCAGTAAAACGAAACACAGGAAACACCAACAATAAAACAGCGAAATCTTCCGAAGTTG
HD3A1002	O19	HD3100478	probe	FBgn0011741	Actin-related protein 6	Arp6	220	GCTGACCAACCAGCTAAAGG	GGGAACACGAACATAGCCC	GCTGACCAACCAGCTAAAGGAGCTAATCTCTTATCGCCACCTAAACGTCATGGACGAGAGTCATGTAGTTAACCAGATCAAGGAAGATGTCTGCTTTGTGGCGGAGGACTTCAAGCAGGCGATGCAGGTGCATTATTCGGAGGAGAAGCGACGCGAAGTCACAGTTGATTATGTCCTTCCAGACTTCACCACCGTCAAACGGGGCTATGTTCGTGTTCCC
HD3A1002	O20	HD3100574	probe	FBgn0033342		CG8258	204	GAGCTGCTGCGTCTAGGAAT	GCTCACCAAATCGTTGAGGA	GAGCTGCTGCGTCTAGGAATCACCACTGCCGAGATCTCCGACGGCTATGAAAAGGCCTTGGAGAAGGCTCTGGAGATTCTGCCCAATCTGGTGAGCCACAAGATCGAGGACTATCGCAATGTGGAGAAGGTCAAGGAGGTACTCCGCACATCGATCATGTCGAAGCAGTACGGCCAGGAGGACTTCCTCAACGATTTGGTGAGC
HD3A1002	O21	HD3100479	probe	FBgn0263112	Mitf	Mitf	213	CTTTAACTGCTGAGGCGAAA	TGGTAAGAAATCCATATTGTCGTT	CTTTAACTGCTGAGGCGAAATTATGTGAACTTCATAATTAGTAAAAAATAAAAATTGTTCTATGTATATTGTTAGTTGGGTATATAAAATTTCCTAAGTATAAAAAATTTAATCCTAAATATGACGGAATCTGGAATCGATTTGGGCTTTGATATGGAGTTTGATCTAAATATAAACTTGTTGAATGATAACGACAATATGGATTTCTTACCA
HD3A1002	O22	HD3100575	probe	FBgn0010280	TBP-associated factor 4	Taf4	225	GCAGGGCAATACCAAAGAAA	CGTAGCAGAGGCAAACTCTTC	GCAGGGCAATACCAAAGAAAAGTGTCGCAAGTTTCTAGCCAATTTAATTGAATTGTCGACACGGGAACCGAAGCCGGTGGAGAAGAACGTGCGCACCCTCATCCAGGAGCTGGTCAATGCGAATGTCGAGCCGGAGGAGTTTTGTGACCGCCTGGAGCGCTTGCTCAACGCCAGCCCGCAGCCGTGTTTGATTGGATTCCTTAAGAAGAGTTTGCCTCTGCTACG
HD3A1002	O23	HD3100480	probe	FBgn0035238		CG12104	202	GAGCAAGCCAGTGCTTGAA	CGTGTCGGTCAGCTCAAAC	GAGCAAGCCAGTGCTTGAAAATACTGTCCCAACGCATTTAGCACATACCCGCCGGCGGTCACACTAATTAAGGCCCACGATAATAAAACGCCTGGCATTGTTTAATTTTATTTGTAAATAAGCCTGGGAGAATTGCAGGAGCGTCATGAATCAGTTCCACACTCCCTCATTCGGCGACGAGGTGTTTGAGCTGACCGACACG
HD3A1002	O24	HD3100576	probe	FBgn0038889		CG7922	205	CCTGATCCTCGTAAGACTCCA	CACGAAGGTAAATAGCATGAGTG	CCTGATCCTCGTAAGACTCCAACGAGACCTCGACACAAACGCAGTAAATTCAATTCCTTTATTTTGGATGAGGCTGAAAAAAGCGGATCGGACCATGAGGAGGAAGGGGAGACTACCATAGGCACATATCTGAAGGACTCCATGATCGTTTCAAGCGATGATGAGGACCATAACGACACAAACACTCATGCTATTTACCTTCGTG
HD3A1002	P01	HD3100661	probe	FBgn0010173	Replication Protein A 70	RpA-70	225	CCTTCAAGGAACAGTGCGAT	CCGACACATCGGAAATAGGA	CCTTCAAGGAACAGTGCGATAAGTTCTACGACCTCATTCAAGTGGATAGCGTGTACTATATATCAAAGTGTCAATTGAAACCGGCAAACAAGCAGTACTCTTCGCTGAACAACGCCTACGAGATGACTTTTTCCGGTGAAACAGTTGTCCAGCTTTGTGAGGATACCGACGATGATCCCATACCGGAAATTAAGTACAACCTTGTTCCTATTTCCGATGTGTCGG
HD3A1002	P02	HD3100757	empty
HD3A1002	P03	HD3100662	probe	FBgn0033859		CG6197	222	GAGGAGTCATTCGGCACATT	GCGCTCCAAAAATTTGGTTA	GAGGAGTCATTCGGCACATTCAAGACGTGCAAAGCCGTCTACGAGCGGATTATTGATCTGAAAATCTGTACGCCACAGATCATTATCAATTACGGAATGTTCCTCGAGGAGCACAACTACTTTGAGGAAGCCTACCGAGCCTATGAGAAGGGCATCTCTCTGTTCAAGTGGCCCAATGTCTACGACATTTGGAACTCTTATCTAACCAAATTTTTGGAGCGC
HD3A1002	P04	HD3100758	probe	FBgn0050291		CG30291	205	ACACTTTGCTGGACTCACCC	TGCTGGATTATTTTCTCCACG	ACACTTTGCTGGACTCACCCAACTATCGCGATCGCTTCCTGGACGAAATCTACGAACTGGAATCCTTTCTACGCATGCGTATCTACGAGCTCAAGCAGCTTGAATCCTCCAGCGACATCATGTTCTCGCTGATGGACAACATTGCCACCCACGACGGTGAGAGCATCTGGAAGATACTCGTGTCCGTGGAGAAAATAATCCAGCA
HD3A1002	P05	HD3100663	probe	FBgn0052685		ZAP3	214	AGGACCATCAGCAGCAAAAC	CCATAATTGCCAAAATCGGA	AGGACCATCAGCAGCAAAACAATAGCAGCCAGAATGCCCGCTCGAGTCGCTGGCAAGGAATCAATTCCGACATCGATACACCGCCAATGAGGACTAACAACAAGCCAAATAGCATCCAGAATAGCCGCAATAGTTGGGGTGATGGAGGTGGAGATGGAAACCAAAGCAAGAACCCATTCATTAAGAATCCACAGTCCGATTTTGGCAATTATGG
HD3A1002	P06	HD3100759	probe	FBgn0032202		CG18619	204	GAGCGAAAGCAACACTCCA	AAACAATAAAAAGCTGTAAAATGCAA	GAGCGAAAGCAACACTCCAACCAACAATGACCAGTTACTTCAGGAACTCGGAATCCTCAAACAAGAATAACCTACATTCTTATTTTTAGCTTAAGAATATTACTTTTATAATAAATGTACGACGGTTACTATTTATATTATTACGAAAATACTGCAGAAATTTTTGTTATTTTCTATATTGCATTTTACAGCTTTTTATTGTTT
HD3A1002	P07	HD3100664	probe	FBgn0011764	Dorsal switch protein 1	Dsp1	111	CGGTAACAGAACACCGTCAC	AAAGATTAACCATTCCACCATGA	CGGTAACAGAACACCGTCACAATTTGTTCAGAAATTTGTCTGGAAAAGTTAATATCAATCGTATTTTGATCAAAGAATAAGTTAAAAATCATGGTGGAATGGTTAATCTTT
HD3A1002	P08	HD3100760	probe	FBgn0004367	meiotic 41	mei-41	209	TCCCAGCCAGGTAAATTGAG	TGCTGGGCAATACATTCAAA	TCCCAGCCAGGTAAATTGAGTGTCTTTAAAGTCAAAGATCGCATTGAGCTATACTGCCCGAAATGCAGGCCACTGCCAAAGAAACTGCCAGGTATTTACCTCGGAAAATGCAAGCAACAGCTGCCATGTCCAGACTTTTCAAGCACCAACCTCGAAATGATAGCAAATGATTTATTGTTTTATCCCGATTTTGAATGTATTGCCCAGCA
HD3A1002	P09	HD3100665	probe	FBgn0026262	bip2	bip2	222	TACCGAACAGCCCTCGAATA	GCATTTGACAAAGCATTGGA	TACCGAACAGCCCTCGAATAATTTTTTGTCAAACCTGTATGCAAAAGAAAAAAAGGACAGAAAAAAGTACAAATCATTACCAGAAAATGTAATGCAATTAGACAAGAGCTGTTCTCCTGAAAAGGCATCAACACTACATAATTCTATTCGACCCACAAAACAAAATAATGATGTACAATGTTCAGATAAATTTGTGACTATATCCAATGCTTTGTCAAATGC
HD3A1002	P10	HD3100761	probe	FBgn0031607		CG15440	220	GGACAAACTGAACCGAGAGG	GGAGCATAAAAGTTTATAGCAGGC	GGACAAACTGAACCGAGAGGCCATTGATGCCGACCGCCGTCTGTACGATGCTCTGGAGAGCTCTAAGTGGCTGCCCATTGAGCAGCTGGAAGTCTTTTAGGATACTTATCTACTATATTTATAGCTTACTATAATTACAGCTTAGATATAAGCAAAAAATATAAAAGCCTGACTTGTAGCGTATTATTGTTTTTGAGCCTGCTATAAACTTTTATGCTCC
HD3A1002	P11	HD3100666	probe	FBgn0035227		CG12090	214	CATCACGGAGGACACCAAG	GTAGAAGGTGCGGGAGAACA	CATCACGGAGGACACCAAGATTGTCTTCCGCAGCAGCACTTCGATGGTGTACCTCTTCCTGCAGATGTCCTCCGAGATGTGGGACTTTGACATCCACGGAGACCTGTACTTCGAAAAGGCAGTCAATGGGTTTCTCACTGAGCTCTTTCAAAAGTGGCGAAAATTGAGCTGTAACCACGAGGTGACCATCGTGCTGTTCTCCCGCACCTTCTAC
HD3A1002	P12	HD3100762	probe	FBgn0039115		CG10214	215	ATTCTGGATTCCGCTCCC	GCTTAACAATACAACGCGGA	ATTCTGGATTCCGCTCCCAAAAAATCTTTCACGCATCGTAGTCTGGACGACATCCGAGAAAGCATCAAAGAGCTTGCGTATTACAAAGCGAACTTATTTAAATAAATTAAAGCAAGAATTTAAAGCACCCTAGGAATTCTTTCAATACCTAATGCTTTATTGGCAATATGAGTCTATAATAATTTTGGATAAAAGTCCGCGTTGTATTGTTAAGC
HD3A1002	P13	HD3100667	probe	FBgn0265351	neuronally altered carbohydrate	nac	201	CTGACGGAGGTCTTCTCCTG	GATAATGCTCTCCAGCTCGC	CTGACGGAGGTCTTCTCCTGGCGGGGAACCATCTTTGGAGTGCTTAGTTCGCTTGCTTTGGCCATGTTTTCTATTCAGACGAAGAAATCATTGGGTTATGTCAACCAGGAGGTATGGCTGCTTAGCTACTACAATAATCTCTACTCCACGTTGCTCTTCCTGCCCCTGATCATCATCAATGGCGAGCTGGAGAGCATTATC
HD3A1002	P14	HD3100763	probe	FBgn0026533	Dek	Dek	207	CCCTCGCCGGTAATAAAGA	CGATTTTGGCTTGGACTCAT	CCCTCGCCGGTAATAAAGAAGTCCAACAATAAGGATGCTAAAAAGGAGGACAACTCCGAAAAGGACGAGGAGAACTCGGAAGACGGCGATGAGCCAGAAGATGAGGCTGATGAGAAAGCTAGCGATGAAGAGAGCGAGAAGAAGAAACCGAAATTAGATGCAGAGGACAAGATAAAGGATGCCACTGATGAGTCCAAGCCAAAATCG
HD3A1002	P15	HD3100668	probe	FBgn0004889	twins	tws	218	CGTCCAGGGACATCATCAA	TCTTGTGAGGAGTGTTGGCT	CGTCCAGGGACATCATCAAACCGAAAACGGTGCTTAAGCCACGGAAAGTTTGCACTGGCGGCAAACGAAAGAAGGATGAGATCAGCGTGGACTGTCTAGATTTCAACAAGAAGATCCTGCACACCGCCTGGCACCCCGAAGAAAATATCATCGCCGTGGCTGCGACCAATAACCTCTTCATATTTCAGGATAAATTTTAGCCAACACTCCTCACAAGA
HD3A1002	P16	HD3100764	probe	FBgn0031020	Nat1	Nat1	202	GCTGCATTATTCGCTTCGTT	AGTTCGTACAGACTGCGTGC	GCTGCATTATTCGCTTCGTTAAATCGTTGACCAGCGCCGCCAAGGAGCAGCCGTTCAATGAGCACGTGCAGCAGGTGCTGGAGAAGGCCACCAAAGAACTGATAGGCAGCAAGACGCCCCAGCAGCTCAACGATGAGTTTATTGCCAAACACAACGCTTCCATACTGCATTTATACGAGGGCGCACGCAGTCTGTACGAACT
HD3A1002	P17	HD3100669	probe	FBgn0031392	Apoptosis inducing factor	AIF	206	CCCAAAAGCAAGGAGGGATA	CTCATCGTGATTTGCACTGG	CCCAAAAGCAAGGAGGGATAAAGGAGTCGAGATCAATTAAACACCGCCGGACTTCACACGGAGAAATTTGTCATAGAAATTGGTTTTTTTGTAAATAAAACACGAACTCGCAAAACACACGTTTCTTTCGCCGCACAACGTTGTTACGTTACACAATTGTGGATTGTGGTGTCACCTACTCCGCAGCCAGTGCAAATCACGATGAG
HD3A1002	P18	HD3100765	probe	FBgn0003189	rudimentary	r	208	TCCAGACGTTAATTGGAGCC	GATTCCGTGTACTTTCAAGCG	TCCAGACGTTAATTGGAGCCAATTTGCAAGCAAACACAGTTAAATGCTCAAACTAAACATATCCGAGCAGTGCGAAGTTAACCAGCTCTAAAAGCGGTGTCGCAAAGTAAACAAATCAAGTTGTCAATCGAATTAAAGTCGAAACCAAAACGTGTTCACAACTACAAGTGCAGCAAAGAGAGAGCTTCGCTTGAAAGTACACGGAATC
HD3A1002	P19	HD3100670	probe	FBgn0027375	homolog of RecQ	RecQ5	213	AAAGGGAAGGGGACGATAAG	GGGATGCTTTGTCTTTACGG	AAAGGGAAGGGGACGATAAGTCAAGCAACAAACTCGAAAAACTGGGATTTATTTCAGCCCGGGAAATGCTGGAGAAAAACAAACTTAACGAAAGATGTTTGGACAAAAAAGACGTTAAGGAAAAGAAATTAGAAAGTAGGGAAACCAAAAGATCGCTACAAAACAACGAATTACAACATAAGCAAGAGGAAGACCGTAAAGACAAAGCATCCC
HD3A1002	P20	HD3100766	probe	FBgn0035025	unconventional prefoldin RPB5 interactor	uri	201	TCAGAAGGGAGGAGACCGTT	CCTGGACACTCTGGTTTTCC	TCAGAAGGGAGGAGACCGTTGCCGAAATGTTGCCCAATGCGAAAAAGAACTCGAGGGATATCATCAAGCTAAATGCACCTCTTAAACCGGCAGGAGATCCACAACCCGCATCCATTAAAACAAAACGTCAAACAACCCAGGATATCTTGCAAAAAGTAGAACGAAACATTGAGTTTGTCAAGGAAAACCAGAGTGTCCAGG
HD3A1002	P21	HD3100671	probe	FBgn0037008		mTerf3	203	AGGATATGGGCCTTCCACAT	ATCACTTTTAGCCACATTTCGG	AGGATATGGGCCTTCCACATGCCCAGATTGTCCAGTGCCCGGAGCTTTTGGCCTCACGCGAATTTAGACTGCGGGAACGTCATGAGTTCCTGAAATTGCTTGGAAGAGCGCAATATGATCCGCAAAAAGACCTGTATATATCGCCAAAAACTATAGTGGAAGGCAATAACTTTTATTTCGTCCGAAATGTGGCTAAAAGTGAT
HD3A1002	P22	HD3100767	probe	FBgn0026080	Tip60	Tip60	202	GTTGCCCAGCAGTTGTGGT	AAAAACGCTGAGAAGGTCAGA	GTTGCCCAGCAGTTGTGGTCACAATTACCCAGTAACTGAAGTTTTCCGCGGATCACAGTAGTCATTTATTGATAAATACGCCAGTCGATGACAGCTGTATAACTTTCTGCGCACTCACACGAGCGCACACGAATGTACGCACCCACACACACGCACACAAATTTACGCCTGTGTACATTTCTCTGACCTTCTCAGCGTTTTT
HD3A1002	P23	HD3100672	probe	FBgn0039165		CG6204	221	TGCTCTGTTCGGAGTCAGTG	TATTTGGCCATTGTAAGGGG	TGCTCTGTTCGGAGTCAGTGAAGGAATACGAGGACATCCGCCTGATGTCTAAGAACTTGTACTTCGTTCAGCACAACCAACCTGAGCACTGCATGTCTGATATGTCCATTGGGAATCTTTATGAAGCTGGAGTGTTGGCTAAATTAACTGAGTTCCTAATCCAGAAGGCCCAATATAAGCACAGCGATATTGTGATATTATCCCCTTACAATGGCCAAATA
HD3A1002	P24	HD3100768	probe	FBgn0030945	Ing3	Ing3	212	GGATTAACTTCGTTTCGCCA	AGATCTAGTTCGCGCATCTC	GGATTAACTTCGTTTCGCCATCCGGTCACACACATACCCGCAACAATACACGAATTTTCATTAATAAACACACAAAGTAGTTAAAATTTTGGGTTTACACCGCGGCCCATTCGCATCGCCATCATGCTTTACCTCGAAGACTATCTGGAGATGATCGAGCACCTGCCGCAGGAGCTGCGCGACCGCTTTACCGAGATGCGCGAACTAGATCT
HD3A1003	A01	HD3100769	empty
HD3A1003	A02	HD3100865	empty
HD3A1003	A03	HD3100770	probe	FBgn0029693		CG6379	223	CAGCCTGTGCACAACAATTC	CCGAAGGTTCGTCCATCTT	CAGCCTGTGCACAACAATTCCAAACAGTCGCTCACATATCTTTGTAAACACAAAAATCGCCACAGAAAGAAAAGTCCCATTAATTTATAAATCCATCCAGCTGATTTAATTGTTATTGTATATAATCAATTAATACGCTGCACAAACTCGAGCATCGCGCCGCCTACAATTCCAGAGCATAGATCAGATTCCATCGCGGCCTTCAAGATGGACGAACCTTCGG
HD3A1003	A04	HD3100866	probe	FBgn0003444	smoothened	smo	224	CCGGATTGGATCCCTCTATT	TGCCACCTGTTTGCTATTTG	CCGGATTGGATCCCTCTATTCTTAATGAATTCCTGCAGAAAAATGGCGATTTTATATTCCCATTCCTCCAAAATCAAGATATGAGCTCTAGTTCGGAGGAGGATAATTCCAGAGCATCCCAAAAGATTCAGGATCTTAACGTGGTTGTAAAGCAGCAGGAAATAAGTGAGGATGATCACGACGGAATAAAGATTGAAGAACTGCCAAATAGCAAACAGGTGGCA
HD3A1003	A05	HD3100771	probe	FBgn0032690		CG10333	202	GACATTGGTCCGAGAAGGAA	ATAGCTTGCCTCTGAATGGG	GACATTGGTCCGAGAAGGAAAATGATGAAATGACTGAACGCGATTGGCGTATCTTCAGGGAGGACTACAATGTTACAATTAAGGGTGGGAGAATTCCCAATCCCATCCGAAGTTGGAATGAGTCCGGATTTCCCAAGGAGATCATCGACATTATCGACAAAGTGGGCTACAAGGAACCAACGCCCATTCAGAGGCAAGCTAT
HD3A1003	A06	HD3100867	probe	FBgn0026598	Adenomatous polyposis coli tumor suppressor homolog 2	Apc2	216	CAGCACAACTGGCTTTCTGA	GGCTGATCCAAGTCGATCTC	CAGCACAACTGGCTTTCTGAACAGAAAATGTGAGAGCCGAGAGTCCATTTACTCGGGCAAATCCGATTCCACTAAATACTCAACCAAGTCGGAGGGAGCGAAGAATCCCTTCGAAATTGTGACACCCACTGAAGAGCAGCCCATTGACTACTCCATGAAGTACATGGAGCACAAACCCAATAGCAGTAAGACCTTTGAGATCGACTTGGATCAGCC
HD3A1003	A07	HD3100772	control_rh3	FBgn0003249	Rhodopsin 3	Rh3	171	GTCTTCTCCGCAGCCAAAT	GGAGCCAATGATTCCAAAGA	GTCTTCTCCGCAGCCAAATCGCTGCGAACTCCCTCCAATATACTGGTCATCAATCTGGCCTTCTGCGACTTCATGATGATGGTCAAGACTCCGATATTCATCTACAATAGCTTCCACCAGGGATATGCGCTGGGTCATCTGGGATGCCAGATCTTTGGAATCATTGGCTCC
HD3A1003	A08	HD3100868	control_th	FBgn0260635	thread	th	173	CGGTGAAGGTCTTTAATCGC	ACAACCAGAACACAAAATGGC	CGGTGAAGGTCTTTAATCGCGTCTCCTCGCGGTTTAAATCGTTCATTCTGGTTTTGTTTATATTATTTTTGAATAGCTGGGTCGCGTTCGTGTTGTTATCCACCTGATCAAAAGCGATAGGTCCATAAGACGGAAGATCAGCTACAACAGATGCCATTTTGTGTTCTGGTTGT
HD3A1003	A09	HD3100773	probe	FBgn0028509	Centaurin gamma 1A	CenG1A	201	GGAGCCAAAGAGCAGTGAAC	TACTGCAGCGGAATCTCCTT	GGAGCCAAAGAGCAGTGAACTGGGCAGTGGACGTTCCATACCCATTAAACAGGGCTACCTGTACAAACGCTCTAGCAAATCCTTGAACAAGGAGTGGAAGAAGAAGTATGTGACCCTGTGCGACGACGGCAGGCTTACCTATCATCCCTCTTTGCACGACTATATGGACGATGTGCACGGCAAGGAGATTCCGCTGCAGTA
HD3A1003	A10	HD3100869	probe	FBgn0027529		CG8920	201	CTAACGGGCATCATAACCCA	GCGGGTTTCTTTTTCCTTCT	CTAACGGGCATCATAACCCAAGAGCTGTTTGAAAGTTTCAATAATATTCAAGGTCCGTTTTCGGAAAACCTGCAGGTTTTCAACAAAAATCCAGAATATATCACAAGGCGAAAGAAAGAGCTTAAGAAAGAAGACGATCTAGATCGTGGTCAAATAACGAAGGAAGTCGCTAGGGAAAAACAGAAGGAAAAAGAAACCCGC
HD3A1003	A11	HD3100774	probe	FBgn0032921	M-phase phosphoprotein 6	Mpp6	208	CTGATGGTTTCGCCCTAGTT	TTCTGGTTGATCTCGTTGGA	CTGATGGTTTCGCCCTAGTTTTTAAACTCAAAGGACTTCTACTATATTAGATTCAAAAATAAATAAGGAAAATGCCATCCAAATCAAAGCCGAGACTTTCGCGTGGTGTCCTGGACATGAAGTTCATGCAGCGCACAAAAGTTAAAGTGGAAAAGGAGGCAGACGATGAGCAGAGCAGGGCACTGTACTCCAACGAGATCAACCAGAA
HD3A1003	A12	HD3100870	probe	FBgn0033972	Ciao1	Ciao1	220	GCATCCAACCAAGGACATTT	TGTATTTCCGGGATGGTAGG	GCATCCAACCAAGGACATTTTGGCCTCCGCCTCGTACGACAATACCATAAAAATGTTCGCAGAGGAGCCCATAGACAACGACTGGGATTGCACAGCCACTCTTACTTCACACACAAGCACGGTTTGGGGCATTGACTTCGATGCTGATGGCGAGCGCCTGGTTTCCTGTAGCGATGACACCACAATAAAGATTTGGAGGGCCTACCATCCCGGAAATACA
HD3A1003	A13	HD3100775	probe	FBgn0264089	slit	sli	203	AAAACGCCTCGAACTCGATA	TGGCACATTTATGAAGCAGC	AAAACGCCTCGAACTCGATATCGAATCGAAAGGATTAATCCAGTGAAATCAGTGAAGTGAAAGTGCCTGCGAACGCATCATCAATCCTTTATCCTTTCTCCCTCAAATATTTACCCAGTGGTGATTGCTGTTGACAAAGTGGATTGGCATATACGGGGGCCACTTTCAATTAGGCACGTTGCCGCTGCTTCATAAATGTGCCA
HD3A1003	A14	HD3100871	probe	FBgn0024491	Bicoid interacting protein 1	Bin1	215	ACTGACCTCTCTGGTGCGAG	GCGGAGTAATCGAGATGTCC	ACTGACCTCTCTGGTGCGAGACGTCAATCCGGACACCCGGAAGAAGGGCACCTACTTTGACTTTGCTGTCGTGTACCCCAACTTCCGGAGTAATCACTTCCAGATGCGCGAAATCGGAGTGACCTGCACGGGTCAAAAAGGAATCGATGATAATAAGACACTTGCTCAGGCCAAATTCAGCATTGGAGACTTTCTGGACATCTCGATTACTCCGC
HD3A1003	A15	HD3100776	probe	FBgn0035838	lariat debranching enzyme	ldbr	219	TTATCCCTGCCAGCACCTAC	CACGGAATTTGTTTGGGTTT	TTATCCCTGCCAGCACCTACAACTGCAGCAGCTGATACCACCGATGAAAACGTGATAGACCTGCCCGAGGAGGAAGCTGAAGAAGCAATTATAGCAACGGAAACGCCTCATGTAGAGGAACCTGCATCAGTGCCCGCTAGTCCCAATGTGAAAAAACTTAAGCGACGCAATCAGAACATTTACCAAGCGCAAGAAGATTAAACCCAAACAAATTCCGTG
HD3A1003	A16	HD3100872	probe	FBgn0265574	Cell division cycle 5 ortholog	Cdc5	225	GGCTACGGGTGTCGTCAATA	TCTGAGTTGGTCTCAATGCG	GGCTACGGGTGTCGTCAATACACCTGCCTACGTGAGGGACAAGCTAAGCATCAATCCTGAGGAGAGTATGGGCGTCACCGAGACCCCAGCACATTACAAAAACTACCAAAAGCAACTAAAGTCTACACTGCGTGACGGTCTCTCCACGCTGCCCGCTCCACGGAATGACTATGAGATCGTGGTGCCTGAGCAGGAGGAAAGCGAACGCATTGAGACCAACTCAGA
HD3A1003	A17	HD3100777	probe	FBgn0022361	Purine-rich binding protein-alpha	Pur-alpha	203	TCCAGAGAAATGTTGGATTCG	ATATATTGGTTGGTCAATCGCC	TCCAGAGAAATGTTGGATTCGCTTTCGAGATATTTTTAATGATTATTGCGAGAAAATGAAAAAATCGTCCGACTCAATTACTGCCGAAATTAACTTACCTACATCTTCAAATAGTCTTAAATAAACAACATACCGTGATTTACTAAGTTATATAAGAAGGCGCGAAAATAAAATTTTTAATGGCGATTGACCAACCAATATAT
HD3A1003	A18	HD3100873	probe	FBgn0010504	kermit	kermit	206	GCTGTGGGGTGCCATAAC	AACAATTGGCAAAGGCAGAC	GCTGTGGGGTGCCATAACGGATGCCCGGCGCAAGTCCACGACCAGTCCCAAGTAATTGGGTAACCATACCAGACGCTTTTCCAATAAATGAGGAGTGCTATTATCTACTATTTGAGAACGTTTTGTTTTAGAGCCTAGTTTTATTTACCACATATCATGCTACAATCCCATATACAAACATATGTCGTCTGCCTTTGCCAATTGTT
HD3A1003	A19	HD3100778	probe	FBgn0014022	Rlb1	Rlb1	223	CAGAACAAAGTGGTGGATGC	TTATCTCCGGGTTGATCTGC	CAGAACAAAGTGGTGGATGCAGATGTTAATGGAGCAACTGCGGAAACGCCCACTCTTCAAGTCAGCAAAGTAAATGATCAGGAAATACCACAGTCTTTTGCAAAAACTGAAAATTCTCCAGTTCTCAAAGTCAAAAAGGAAAAGACACCTAAAACACCAGCCAAAAAAGAAAGAAACCTTCAGAAAAAACAAGCTTTTGATGAGCAGATCAACCCGGAGATAA
HD3A1003	A20	HD3100874	probe	FBgn0034761		CG4250	216	CCTACGTGGGCACCTACAAG	CGCCAACAATTTGTGTGATT	CCTACGTGGGCACCTACAAGAACTAGAAGTGCTATCTCAACACCAAATATTACAGGGATAGATCCCACTTTGTATCTCCACACCTATTGATGGGATCAGATTTGGCACGAATATTCACGAAATACAACTCTGGTTCAAATCAATTGAATATATGTATGTAATTTTCGCATTGGTTTACTTTTCAAAATAAATTTCTAATCACACAAATTGTTGGCG
HD3A1003	A21	HD3100779	probe	FBgn0034726	Mesoderm-expressed 4	Mes4	217	GGCCAGGATACGGAACATAA	GGCTCCATCAAGGAATAGCA	GGCCAGGATACGGAACATAATGAAACTAGATCCGGATCTGCATATGGCCAACAATGAGGCCGTGTTCATAGTGGCGAAGGCAGTGGAACTATTCATAGCCTCGTTGTCACGGGAATCATATACCTACACGGCGCAGTCCAAAAAGAAAACCATACAAAAGAGGGACGTGGATATGGCCATTTCTGCTGTGGACAGTTTGCTATTCCTTGATGGAGCC
HD3A1003	A22	HD3100875	probe	FBgn0029912		CG4557	204	GATTCGGTGGATCTGCTGTC	ATTGTCGGATGTGTCATTGC	GATTCGGTGGATCTGCTGTCCTCCCCAACCTCGCCCATCTCGCCCTGCGGCGGCGATGTCCCCTCGGTGGCCAAGCGCTTGTCTGAATCCTCGCTAGAACTCATAACGGCCACCACGGCCAGCGAAGTGGAGATGTCACCGGACACGGAGCCCTCCTTGCCCGACAGCATTGTGATAATCGCCAGCAATGACACATCCGACAAT
HD3A1003	A23	HD3100780	probe	FBgn0004856	Bx42	Bx42	212	AGAAGGAGAGGGAGCGTGAC	CTTGCTGGGTCGGTAGATGT	AGAAGGAGAGGGAGCGTGACATTTCTGAGCAAATCGCTTTGGGTCTGCCCGCCAAGAGTGCCGGCAACGGTGAAACGCTCTTCGATCAGCGTCTATTCAACACCACCAAGGGCATGGACTCCGGTTACGGTGATGACGAAGCGTACAATGTGTACGACAAGCCGTGGCGCGATTCCAATACACTGGGCGCTCACATCTACCGACCCAGCAAG
HD3A1003	A24	HD3100876	probe	FBgn0035644	Pole2	Pole2	204	GCACTGGGACTACGATCCTG	TCCAATTCGTCCGGTATCTC	GCACTGGGACTACGATCCTGCTCTGTGGTTGTATCCACTGCCGGATCTGATTGTCATGGGCGATTCGTGTCAGAGCTTTAGCAGCAGTCAACATGGCTGCACTGTTCTCAATACCGGCTCCTTTGTCAAGTCCAAGTTCGCATTCAAAGTGTATATACCAGCGACGCGAACGATTGAGGACTCGGAGATACCGGACGAATTGGA
HD3A1003	B01	HD3100961	empty
HD3A1003	B02	HD3101057	empty
HD3A1003	B03	HD3100962	probe	FBgn0040207	katanin 80	kat80	218	TGCGTTTTGTTGTTCGTTTC	TCTTGGATATCAGTTTTCTGGG	TGCGTTTTGTTGTTCGTTTCGTAAATAAGTGGGCTTCATTTTGCCCAAAAAAGACGGGAGCCCAGACAGCTGATCACAGACTTTGGCTCACACCTGCTACAAAAAGATAATATTTATTCGAAAACCTGGCATTCGGATCGAATTTAGCAGCTGCCAGCGTATTTATATAAGAACAATTTGATTGATTATGGCGCTGCCCAGAAAACTGATATCCAAGA
HD3A1003	B04	HD3101058	probe	FBgn0051155	Rpb7	Rpb7	207	GGATTCGTGATAGCGGTGAC	ATGATGCGAAATGAAGCAGG	GGATTCGTGATAGCGGTGACGACGATAGATCAAATCGGATCGGGTGTCATCCAGCCGGGCCAGGGATTTGTGGTGTATCCGGTCAAGTACAAAGCTATCGTCTTTCGGCCATTTAAGGGCGAAGTTCTGGACGCAGTGGTCAAGCAGATCAACAAAGTGGGCATGTTTGCAGAGATCGGCCCGCTGTCCTGCTTCATTTCGCATCAT
HD3A1003	B05	HD3100963	probe	FBgn0011656	Myocyte enhancer factor 2	Mef2	201	CTGGGGACAATTTATACGGAAA	AAACTCCGTTAGTTGCTGCC	CTGGGGACAATTTATACGGAAACACAATTATATAAAATTATATACACAACTATATACAAGTAGAACTTGCCGTTTTAACAAGCCGTCCACTTATAAAACAAACAGAAGGGATTATATATAGACAACCTATATAAATATGCCCCACGTCTGCCACGCCAGGAAGAGCCACAGCAATTCGCAGGGCAGCAACTAACGGAGTTT
HD3A1003	B06	HD3101059	probe	FBgn0031399	missing oocyte	mio	220	CCAAGCCGAACACATTGAG	AAATGCAATTGAGCAGCTAAAAG	CCAAGCCGAACACATTGAGAGACATTTCCTAGCTGTCCGGAGCACCCACCATACACAGCCCTTACTCGCCCAGGCCATATGCATATGCATTAAGTTGTTGATTTGTTCCAAACGCGTGCGCCTTAAACAAACTCAGAAGTGTTCATTGTACTTAGACAAGGGATGTGCCCGTAGCATTAGTGTTTATGACCTACCAGCTTTTAGCTGCTCAATTGCATTT
HD3A1003	B07	HD3100964	control_th	FBgn0260635	thread	th	173	CGGTGAAGGTCTTTAATCGC	ACAACCAGAACACAAAATGGC	CGGTGAAGGTCTTTAATCGCGTCTCCTCGCGGTTTAAATCGTTCATTCTGGTTTTGTTTATATTATTTTTGAATAGCTGGGTCGCGTTCGTGTTGTTATCCACCTGATCAAAAGCGATAGGTCCATAAGACGGAAGATCAGCTACAACAGATGCCATTTTGTGTTCTGGTTGT
HD3A1003	B08	HD3101060	control_rh3	FBgn0003249	Rhodopsin 3	Rh3	171	GTCTTCTCCGCAGCCAAAT	GGAGCCAATGATTCCAAAGA	GTCTTCTCCGCAGCCAAATCGCTGCGAACTCCCTCCAATATACTGGTCATCAATCTGGCCTTCTGCGACTTCATGATGATGGTCAAGACTCCGATATTCATCTACAATAGCTTCCACCAGGGATATGCGCTGGGTCATCTGGGATGCCAGATCTTTGGAATCATTGGCTCC
HD3A1003	B09	HD3100965	probe	FBgn0029941		CG1677	202	GCAGCTGCCATATTCTTTAGG	CGCTTTCCTCCTTCAATCTTT	GCAGCTGCCATATTCTTTAGGCAAACGTTTTCTGTCGGAAACAGTTTTTTCATTAACACAAAAAAAGGCATCCAGAGCATTTGCTGTAGCACAAAAACATCGAATTTCCAACGCTACCAGGTAAACCAGTCGCCGCCGAGCCGCCGGAAAAACGGGCTTTCCAGTTCGTCTTTAGCGGTAAAAAGATTGAAGGAGGAAAGCG
HD3A1003	B10	HD3101061	probe	FBgn0039227	polybromo	polybromo	215	TCTAACGCCTCCCATACACC	TTCATGTCAATGGGGTTTTG	TCTAACGCCTCCCATACACCAAATAACTCGAATTCACCCAAATCAAATCGCATTGCCATCAACGCGGCTATTAAAAAGAAGATTCTGAGCATACAGAAATATTTGGTGGACTACTCCTTGGGCAATCGTCGTCCCATCGAAATGTTTATGGAAAAGCCGCCTCGCAAGATTTATCCGGACTACTACGATATCATTCAAAACCCCATTGACATGAA
HD3A1003	B11	HD3100966	probe	FBgn0040283	SMC1	SMC1	206	GAGGAGCACATCCAGGAAAT	TTCTGTTTCTCGAAGTCCAGC	GAGGAGCACATCCAGGAAATCAAAGAAAACATGAACAATGTGGAGGACAAAGTATATGCCTCTTTCTGCCGTCGCTTGGGCGTGAAGAACATACGACAATACGAGGAGCGTGAGCTCGTCATGCAGCAAGAGCGAGCGCGTAAACGGGCTGAGTTCGAGCAGCAGATTGATTCCATAAACTCGCAGCTGGACTTCGAGAAACAGAA
HD3A1003	B12	HD3101062	probe	FBgn0001169	Hairless	H	214	GGCCAACCATTCGAGTTAAG	TGGAACGGGTTTAAAAACAAA	GGCCAACCATTCGAGTTAAGAACATTTTCGCACTAGTAGCGCTTAAGACGACATTCAATACACGTAATATAATTTGATAAGTTCGCTGATAGTTTAGTTGTAACCCGATTGTTTAATCCTAAGCCTAATCCTAGGTTCTCAATTAGGGCCGAACATTTAGAAATCGCATACAAAAAGAGATGAAAAACTCAACTTTGTTTTTAAACCCGTTCCA
HD3A1003	B13	HD3100967	probe	FBgn0019968	Kinesin heavy chain 73	Khc-73	204	CTCATTCATGGACGTCAGCA	TCATCAATGCTCATGGAACG	CTCATTCATGGACGTCAGCAGCCATTCGAACCAAAGCTACTTGAGCTACACGTCCAGTGCCAACGCTAACATGAAGCACCTGACCGGCCTGGCGACTTTGAGCATGAGCTCATCCACCAGCAGTGGCTACGGTTCCCAGGCTGTCTCCTGCAATAATCTGAGCAACGAGGATATTGCTTCAATGCGTTCCATGAGCATTGATGA
HD3A1003	B14	HD3101063	probe	FBgn0011202	diaphanous	dia	210	ATGCGAAGAGATCCGGAATA	TCTGGGAATTTCTTTTCCACC	ATGCGAAGAGATCCGGAATAGCAAAAAGTTCTCAAAGATCTTGGAGCTGATTCTGCTGCTTGGAAATTACATGAACTCGGGCTCCAAAAACGAGGCCGCCTTTGGCTTTGAGATCAGTTATTTAACCAAACTGTCCAATACGAAGGATGCGGATAATAAGCAGACATTGCTGCACTACCTGGCTGACCTGGTGGAAAAGAAATTCCCAGA
HD3A1003	B15	HD3100968	probe	FBgn0033528	translin	trsn	218	GAGCTCTCCCGATTCGCTAC	TTTTCCTTGCTGGACAGACC	GAGCTCTCCCGATTCGCTACCAATTCCGTCACCATGGGCGACTACGAGCGTCCCCTGAATATCTCCCATTTTATTGGTGACCTGAACACGGGCTTCCGTCTGCTGAACCTGAAGAACGATGGCTTGCGAAAGCGCTTCGATGCCTTAAAGTATGATGTCAAGAAGATCGAGGAGGTCGTCTACGATGTCAGCATACGCGGTCTGTCCAGCAAGGAAAA
HD3A1003	B16	HD3101064	probe	FBgn0034795	Mediator complex subunit 23	MED23	201	AGGACAAACACTTGTCATTCCA	TCAGATGATCCAAAATGAAGC	AGGACAAACACTTGTCATTCCATCAAAAGTATCCAGAGAAGTTCGCGTTGGACGAGTCAGCTTCACAGATTCCGCTGCCCGTGTACTTCAGCAATGTCTGTCTGCGATTCCTTCCCGTTCTGGATGTGGTAGTGCACAGATTTATCGAACTTACCATTACAAATGTCCACCAGATATTGGGCTTCATTTTGGATCATCTGA
HD3A1003	B17	HD3100969	probe	FBgn0017577	Minichromosome maintenance 5	Mcm5	221	GAACGCACGGTAATGAAGGT	TGATTCAATTTGGTTTATTGGG	GAACGCACGGTAATGAAGGTAATTCATACCATGATCCGACGTGGAGAGCTGCAGCACCGGATGCAACGGAAGATGCTCTATCGAATTTGCTAAACACTGTTAATCACTTCATTTCTTGTCCATCGTTGAATATGTCTTCAATCATTTCGTCACATTATTTGTATTTCCATTTATAGTATTAAGATAAACTACATTCTTTCCCAATAAACCAAATTGAATCA
HD3A1003	B18	HD3101065	probe	FBgn0030871		CG8142	203	CTGCAACTATGTGTCCCGAA	ACTGCAAGGTGGTGATAGCG	CTGCAACTATGTGTCCCGAATTATCGTGCCAATCACGTCGCGTTGCTCTAAATTTCGCTTCAAGGCGCTGGGCGAAGACAAGGTGATCGATCGTTTGAAGTACATTTGCGAGATGGAGGGAGTAAAGATAGAGGACGATGCCTATAAATCCATTGTCAAAATTTCCGGCGGAGATCTGCGACGCGCTATCACCACCTTGCAGT
HD3A1003	B19	HD3100970	probe	FBgn0005427	erect wing	ewg	202	AAAGCGAAAGAGACCCCATT	CAACACATCTTCCAGGGGTT	AAAGCGAAAGAGACCCCATTGTTTCGAAACGAATCCCTCGGTTAGAAAAAGGCAACAAAATCGATTGTTGCGCAAGCTGAGAGCTATTATCTATGAGTTTACGGGCAGAGTGGGCAAACAAGCGGTAGTTTTGGTGGCAACACCGGGTAAACCCAACACAAGCTATAAGGTTTTTGGAGCCAAACCCCTGGAAGATGTGTTG
HD3A1003	B20	HD3101066	probe	FBgn0040273	Spt5	Spt5	212	GCCACAGCGCTTCTTCTAAT	GTCATCTCCTTGATGGGCAC	GCCACAGCGCTTCTTCTAATGCGAAAGTACTTAACCTACCTGAACACAGACGATCCATTGCAAATCAAATCTATTATTGCACCAGAGGGCGTCAAGGGATACATTTACCTGGAGGCCTATAAGCAGACTCATGTTAAAACTTGCATTGATAACGTGGGTAATCTTCGGATGGGCAAATGGAAACAGGAAATGGTGCCCATCAAGGAGATGAC
HD3A1003	B21	HD3100971	probe	FBgn0037981	Spt3	Spt3	205	GGCAAATGAGCAGCCGTA	TAGAGCGCGTTAATTGTTGG	GGCAAATGAGCAGCCGTAAGATTGGGCGGTATCGCAACTCTTGCGACATCGATTTCCGGCGCAGTTTTCTAGCCATTTAAGTTTTAATGATCTTAATATCCTCGCCTATTTTTATTTGCGTCAATTATTGATTTTATTCACAAAAAATAGACTGTACAATTAATTCATTTAAAGTAATTCAATCCCCAACAATTAACGCGCTCTA
HD3A1003	B22	HD3101067	probe	FBgn0041092	taiman	tai	219	CGTCTAAAAGAAATCGCGAAA	GGCCAGCACTTAACGCATAA	CGTCTAAAAGAAATCGCGAAAACATAAATACCAGACACAAGCTCTAGTTAAATATTTTGAAAACAGCATAATAACTTCATAAGAAGATGCAAACATGATATAAGTAATGCATATTTATTACGTTTAAAGATAAAGCCTAGTACTAAGAGCTATATATACAAAAGAATGAAAGCAGAAACAAAGCATAAAACATAAATAATTATGCGTTAAGTGCTGGCC
HD3A1003	B23	HD3100972	probe	FBgn0036516		CG7656	216	GTCAAGCTGATCAACGACGA	CACCGGCGGATGTAGTATG	GTCAAGCTGATCAACGACGACAATCTGTTCGAATGGGAGGTGGCAATCTTCGGGCCACCGGACACCCTCTACCAGGGCGGCTACTTCAAGGCGCACATGAAGTTCCCGCACGACTATCCATACTCACCGCCATCCATACGCTTCCTGACGAAGGTCTGGCATCCGAATGTTTACGAGAACGGTGATCTGTGCATATCCATACTACATCCGCCGGTG
HD3A1003	B24	HD3101068	probe	FBgn0032006	PDGF- and VEGF-receptor related	Pvr	224	CATTGAGACCAGCCATACCA	TTTGGCTTAGTTTGCGCTTT	CATTGAGACCAGCCATACCAAGTACTCCTACAAGAGCACTGTACACATCACAACGATATCCGACAGGGATCGTGGAACCTATGAGTGCCGGGCCTACCACAACGACAAGGATGCCGTTTACAGCAGCCGGGAGATAGACTTGTACGTCCACGATCCCTCTGCTCCTCAGTGGACAAACGGCGGACAGGAGGGTCACTCGAAAATAAAGCGCAAACTAAGCCAAA
HD3A1003	C01	HD3100781	probe	FBgn0002638	Regulator of chromosome condensation 1 ortholog (H. sapiens)	Rcc1	212	GGTCAGCACGCAATCTTTTT	GGCGTCTTGTTCTTTTTGCT	GGTCAGCACGCAATCTTTTTGGTCAAAGCGGACAAACAGGACCAGAAGGAGAATGTTCCAGTGAAGGTGTCTGGCAGCAGCAGCATCAGTAAAAAGGACAAGACCCCGCCGCAGGATAATGTCGACAAGGAAGCCGAGAATGTAGATAAGCAGGAGCAGAAGGAAAACTTGCCGGCGAAGGCGTCAACCAGCAGCAAAAAGAACAAGACGCC
HD3A1003	C02	HD3100877	empty
HD3A1003	C03	HD3100782	probe	FBgn0003334	Sex comb on midleg	Scm	201	CTCGGTTCGGGTTTGACTTA	TAGGGAATTTCATGTCTTCGC	CTCGGTTCGGGTTTGACTTATATAGAAATTGTTAACAAATTAGTACCTCCCTTTAACGTAAAGCAAAGCAAACATGAACGATATTCATAGATGTGTTATGTGTTGGCCATTCATGAAGAAAAAACCCCTACCCTATTTTATTATATTGATAATATAAAACACGCTATAACAAATGTAATCGCGAAGACATGAAATTCCCTA
HD3A1003	C04	HD3100878	probe	FBgn0263198	Acinus	Acn	212	ACCCGCTGTAGTCAAGGATG	CTTCTTCGTCCCTTTCATCG	ACCCGCTGTAGTCAAGGATGATGATGTTGAGAAAGAGGACTTAAAACCGCAGCAGGAGGTCCCCACTTCCACTGATGATGACACCAAGCAGAGCGAGCCAGAACAAGAGGTAAAGGTTCCTTCTCCTTCCAGCAAGGATGAGGAACATCTAAAAACGACTAGTGATGTATTAGACATTCAGACAGAAGAGGTCGATGAAAGGGACGAAGAAG
HD3A1003	C05	HD3100783	control_rh3	FBgn0003249	Rhodopsin 3	Rh3	171	GTCTTCTCCGCAGCCAAAT	GGAGCCAATGATTCCAAAGA	GTCTTCTCCGCAGCCAAATCGCTGCGAACTCCCTCCAATATACTGGTCATCAATCTGGCCTTCTGCGACTTCATGATGATGGTCAAGACTCCGATATTCATCTACAATAGCTTCCACCAGGGATATGCGCTGGGTCATCTGGGATGCCAGATCTTTGGAATCATTGGCTCC
HD3A1003	C06	HD3100879	control_rh3	FBgn0003249	Rhodopsin 3	Rh3	171	GTCTTCTCCGCAGCCAAAT	GGAGCCAATGATTCCAAAGA	GTCTTCTCCGCAGCCAAATCGCTGCGAACTCCCTCCAATATACTGGTCATCAATCTGGCCTTCTGCGACTTCATGATGATGGTCAAGACTCCGATATTCATCTACAATAGCTTCCACCAGGGATATGCGCTGGGTCATCTGGGATGCCAGATCTTTGGAATCATTGGCTCC
HD3A1003	C07	HD3100784	probe	FBgn0052823	Sperm-specific dynein intermediate chain 3	Sdic3	81	TGGTCGCTAAAGCTACCCAT	AAAGGAGTACAGCGGCTTATTT	TGGTCGCTAAAGCTACCCATTTCAAGTTGCCAGTTCTCTGTCGTCTCCGGAATTAATTCAAATAAGCCGCTGTACTCCTTT
HD3A1003	C08	HD3100880	probe	FBgn0039735		CG7911	81	CACAGTTCGAGGTCCCAGAT	GGCCGAGGGAAATCTGTT	CACAGTTCGAGGTCCCAGATGTACCCGAGGAGTACATCGTCCACTCGCACAAGCTCATCATCAAACAGATTTCCCTCGGCC
HD3A1003	C09	HD3100785	probe	FBgn0028579	phtf	phtf	202	GTCGAACAGCGTGCTCAAG	GCCTTGCATAGGTTACTTGATCTT	GTCGAACAGCGTGCTCAAGCTGGCCGCCGATCTGCTAAAGGAACTCGAAACGCCATTCAAGCTCTCTGGCCTTAGTGCCAATCCATATCTATTCACAACCATCAAGGTGGTAATCCTGTCGGCCCTATCGGGCGTGCTTAGCGAAGTTTTAGGCTTTAAACTGAAGCTGCATAAAATCAAGATCAAGTAACCTATGCAAGGC
HD3A1003	C10	HD3100881	probe	FBgn0034985		CG3328	201	GATTTGCTGTCGAACCGACT	GCACGAATCGGCGTTACT	GATTTGCTGTCGAACCGACTTGGTGCATTCGCTCCGCGGATCCAATATCGCGGTTAATCGGGGGAATCGAGAGAGGCGGCTAGTTGGCGCGACTTTAGAGTCAGTGCATCGAGTATACGGAGCGTAAAACACCGACTATAACCGACATCGACACAGTGAAGCTACAGATTCGTAAACAATCCCAGTAACGCCGATTCGTGC
HD3A1003	C11	HD3100786	probe	FBgn0040075	reptin	rept	91	AGCAGGCCGGTAATTTCATA	TTGTGCGATCTTTTCAGTGG	AGCAGGCCGGTAATTTCATATACGAATTTTATGCTTAGCAACTTATTTAAGCCCAGTAAACAACTAGTAAGCCACTGAAAAGATCGCACAA
HD3A1003	C12	HD3100882	probe	FBgn0052581		CG32581	81	GGGCCCTGTCAAAACTGTTC	GGGATGATCCGTGCACTATT	GGGCCCTGTCAAAACTGTTCTGGCATTTTGTCGTTTTTGTGATATATGGGCTGCTCGTTCCAATAGTGCACGGATCATCCC
HD3A1003	C13	HD3100787	probe	FBgn0003391	shotgun	shg	205	CCATGAAAATGCAGTCCAAA	GCCATCGCAGACTCTCTTTT	CCATGAAAATGCAGTCCAAACAAACGGTACACTGAGAGAAACGAAACAAGAAGAAGAGTGCAAATAGAATAGAATAAAAAAGAAGTGGAAGTAGAAGTGGGCAACACAAACAAAAGTAAAAGGTGTGTGAGTGAAATAATACTGGGTGATTCACGAAGAAGTGCTCAAAAGTGTTGCGGTTGAAAAAAAGAGAGTCTGCGATGGC
HD3A1003	C14	HD3100883	probe	FBgn0261617	nejire	nej	207	CGGCGTGTGTATATTGCCTA	CTTGGGTATCTTCTGGTCCG	CGGCGTGTGTATATTGCCTATTTGGATTCCGTTCATTTCTTCCGGCCAAGACAGTACCGTACAGCGGTATATCACGAAATCCTGCTCGGCTATATGGACTACGTGAAACAGCTGGGCTACACAATGGCCCATATCTGGGCCTGTCCGCCATCCGAGGGCGATGACTACATCTTTCACTGCCATCCCACGGACCAGAAGATACCCAAG
HD3A1003	C15	HD3100788	probe	FBgn0023094	cycle	cyc	201	GCTGCGCTGATGGAGTCT	TCGGAACGTTCGTATGCCT	GCTGCGCTGATGGAGTCTCACAAGATGGTGATGCAGGTGCCGGAAAAGGTGACCACTCAGGTCTACCGCTTCCGGTGCAAGGACAACAGCTACATTCAGCTGCAGAGCGAGTGGCGGGCCTTCAAGAATCCCTGGACGAGCGAGATTGACTATATAATCGCCAAGAATTCCGTGTTCTTATAAGGCATACGAACGTTCCGA
HD3A1003	C16	HD3100884	probe	FBgn0031378		CG15362	207	GCCGGTTTGGGCTTAATAGT	CTTGGGAATCGCCAGATAGT	GCCGGTTTGGGCTTAATAGTTTTGGTATCGATCTACAAATGTGCCAGTGGCGAGGTTCGCCAGGCGGAAAGCGAAAAGTGCTTCTTCTGCGACTTCGCCCACCGCCGCCAAGGACCGCCGCCCATCCTGGAGGTGGAGACGGACGAGTACGTGATCTTCAAGGACAAGTATCCGGCAGCCAGACTCCACTATCTGGCGATTCCCAAG
HD3A1003	C17	HD3100789	probe	FBgn0010278	Structure specific recognition protein	Ssrp	202	GATCCACGCGATCTTTCG	GCATCTGGTTCGTTCTCGTT	GATCCACGCGATCTTTCGACTTCGAAGTGACGCTCAAGAACGGAACTGTTCACATCTTCTCCTCCATCGAGAAGGAGGAGTATGCCAAGCTCTTCGACTACATCACACAGAAGAAGTTGCATGTCAGCAACATGGGCAAGGACAAGAGCGGCTACAAGGACGTGGACTTTGGTGATTCGGACAACGAGAACGAACCAGATGC
HD3A1003	C18	HD3100885	probe	FBgn0038608	WRN exonuclease	WRNexo	202	GCAATGGGTGGAAAAACAAA	TCGCACTTTGGGATGATTG	GCAATGGGTGGAAAAACAAAAAGATGAGGTAGTGCCCATGGCCTTCGACATGGAGTGGCCCTTCTCTTTCCAAACAGGACCTGGCAAGTCTGCCGTCATCCAGATATGCGTGGATGAAAAGTGCTGCTACATATACCAGCTGACTAATGTGAAGAAACTGCCTGCGGCCCTGGTGGCCCTTATCAATCATCCCAAAGTGCGA
HD3A1003	C19	HD3100790	probe	FBgn0033349		CG8243	207	CCACTGGACGCATCACTTTT	ATTCGAGGAGCTCATTTTGG	CCACTGGACGCATCACTTTTTCGGTAGCAAAAACTTGTAGAAAATTGTCAATTCAATTCGCTGGTAGTTGTATATCCATGTGAAGCAGAGATAAGCTCCGCCAACTCTACCCGTCGCCCACGCCACGTCGCACAGTTGCGCCCCGCCACAAATATCGAAACCAGGCCTCACAGACCGCAAGCATACCCCAAAATGAGCTCCTCGAAT
HD3A1003	C20	HD3100886	probe	FBgn0001491	lethal (1) 10Bb	l(1)10Bb	206	GATTCCATGTGGACGCATTA	CGATGCCTTGTCGTTTACAT	GATTCCATGTGGACGCATTATTGGCATCTTTATTCGACACAAATAATCCTCATAATACATAGTTCAGTAGGTTCAACTTTAGATTTCGCCTGATTTCTTCATAGTATGTAAATACATTTAAATACAAGCCACAATTATGGTTAATGGCATGCTAAACATCTAAATAGATGCTGCAATAAACCGATTATGTAAACGACAAGGCATCG
HD3A1003	C21	HD3100791	probe	FBgn0035849	estrogen-related receptor	ERR	222	AATTCATATGAGCCGGATGC	GCTGACCAATTCCTTGTCGT	AATTCATATGAGCCGGATGCCTTGAGCGTCCAAACGCCGCCGCCGCAAGTCCACACGACTAGCATAACTAATGATGAGGCCTCATCCTCCTCGGGCAGCATAAAACTGGAGTCCAGCGTTGTTACGCCCAATGGGACTTGCATTTTCCAAAACAACAACAACAATGATCCCAATGAGATACTAAGCGTCCTTAGTGATATTTACGACAAGGAATTGGTCAGC
HD3A1003	C22	HD3100887	probe	FBgn0035993	Nuclear factor Y-box A	Nf-YA	223	GCCAGTGCTGCAGTCAATAA	GATGACGAGATTCGTGCAGAT	GCCAGTGCTGCAGTCAATAATATAAGCGCCGATGTCAGCACAAGTACAACTGGAACGAATACGAACAGCGAGGACGAGAGCTCCAAGGGCGAGGCGGACGAGGAGCCGCTCTATGTGAATGCCAAGCAGTACAAACGTATTCTCATTCGGCGGCAGGCCAGGGCCAAGCTAGAGTCGCGCATACCCAAGGAACGGTGCAAGTATCTGCACGAATCTCGTCATC
HD3A1003	C23	HD3100792	probe	FBgn0010314	Cyclin-dependent kinase subunit 30A	Cks30A	223	CCCCGCATTATTCCCTTTTA	CGTTTCGAAATGGCAACATA	CCCCGCATTATTCCCTTTTATATATATAGCACCTAGAGCTAATGATAAGTTTGCCATTTGTAATACTCTCTTTTTACCATGTTTGCCCCGCATTATCCCCTTTTATATATGTAGCACCTAGAGCTAATGATGTTTGCCATTTTCGTACACCTTAGTGCCGTTTCCGAATCATTCCTCAAGTTCGCACGAATTTTATCATACTTTATGTTGCCATTTCGAAACG
HD3A1003	C24	HD3100888	probe	FBgn0039863		CG1815	211	GCGAACACAAACGAAAGTCA	ACAGAAACCACAGACGCAGA	GCGAACACAAACGAAAGTCAAAGCATGCTAGGAAACAACACGATAATCAGGATAATCAAATTGAAGAGGCAGAAAAAACTGGCCAAGAGCCCCCAAAATCTCCTACAATCTCAAAACAGAATGAAAATTTACGAGATGAAGAGAATGTCATAGAAAATGCTGCCAATGATACTTCCTCGGCATCCCCGGTATCTGCGTCTGTGGTTTCTGT
HD3A1003	D01	HD3100973	probe	FBgn0262737	mushroom-body expressed	mub	207	AGAGTTAACGCAGCGAGCTT	CTTGCGATTATGTTGTGGGA	AGAGTTAACGCAGCGAGCTTAAGCCAACAACGTAGTACGACTAGCAAAAGAAACCACCAATTTAATTTTATCTAGAGAAACATACAATACGCATACGCAAGCAAAGTAGCCAAAATATCTATATGTTTAGTACGTGTATCGCTCATTTATGATTGATATACTCGCATAGCAAAGTTATATTTACAAATCCCACAACATAATCGCAAG
HD3A1003	D02	HD3101069	empty
HD3A1003	D03	HD3100974	probe	FBgn0004406	tamas	tam	224	TCGCAGGTTGGACTTCAGTT	CTTGACCAGATTTTCCGCAT	TCGCAGGTTGGACTTCAGTTGCCTTAAAGGATGTTTCCTTTATTAAAACGAGGATGCAGTTCCACCTGATCAGAAAGTACGCCAGCAAAGTTAGCCGGGAGCACTACGCCAGCAGTAGCGTGAAGATCTTTCGGCGGGTCAAGCCTCCGCAAAAGGTAAACAAACCAAAGAAGCCGGAGAATGTGGAGAATGGCCCAACGGAATATGCGGAAAATCTGGTCAAG
HD3A1003	D04	HD3101070	probe	FBgn0036580	PDCD-5	PDCD-5	202	AAAACTTGATGACGCCCAGT	CATGATTTAGCGGATGTGAGG	AAAACTTGATGACGCCCAGTTCGTCAGCATCCTCGAAAGCGTCAATGCTCAGATGCCGCAGAGCAAGTCCTCCGTGAAATACGATCGGCGGCGGGCGGCCATCGATAGCGACGACGACGAGGATTACGGCTGCTGATTCGTCCGAAATTCCGCCCAACATCTAATTTAAGTTATGCCCGCTCCTCACATCCGCTAAATCATG
HD3A1003	D05	HD3100975	control_rh3	FBgn0003249	Rhodopsin 3	Rh3	171	GTCTTCTCCGCAGCCAAAT	GGAGCCAATGATTCCAAAGA	GTCTTCTCCGCAGCCAAATCGCTGCGAACTCCCTCCAATATACTGGTCATCAATCTGGCCTTCTGCGACTTCATGATGATGGTCAAGACTCCGATATTCATCTACAATAGCTTCCACCAGGGATATGCGCTGGGTCATCTGGGATGCCAGATCTTTGGAATCATTGGCTCC
HD3A1003	D06	HD3101071	control_rh3	FBgn0003249	Rhodopsin 3	Rh3	171	GTCTTCTCCGCAGCCAAAT	GGAGCCAATGATTCCAAAGA	GTCTTCTCCGCAGCCAAATCGCTGCGAACTCCCTCCAATATACTGGTCATCAATCTGGCCTTCTGCGACTTCATGATGATGGTCAAGACTCCGATATTCATCTACAATAGCTTCCACCAGGGATATGCGCTGGGTCATCTGGGATGCCAGATCTTTGGAATCATTGGCTCC
HD3A1003	D07	HD3100976	probe	FBgn0004177	microtubule star	mts	203	GCAATCGAACGCAACAGTAG	GGTGCGAACTTGTGTCTCTG	GCAATCGAACGCAACAGTAGTTGCTAATTTTCCTGCACCCCTGAGTTATAATAAAAGCCGTCAAAATTGAATCGACAAAGATTGACGAGACTTTTTCTTCCACCACAACTGCGATGGAGGATAAAGCAACAACAAAAGATCTTGATCAATGGATTGAGCAGTTGAACGAATGCAATCAGTTGACAGAGACACAAGTTCGCACC
HD3A1003	D08	HD3101072	probe	FBgn0032870		CG2608	207	CAAGACTGTCGCAACCAAAA	CCAAATACGATTAATGTGGGC	CAAGACTGTCGCAACCAAAAAAAAGGATTATACTTCTTAAATCAGAATCAGAGAATCAGACATGACATGCTCGTCTTGTTCGCAAACTCCTGCTCGATAACATCGACAATATTTGACAAAACAGAGCAGTAATCATCTTCAGGGAGCCAAAGATTTTTAAATTTATAGTATTCATACTATGTTTTTGCCCACATTAATCGTATTTGG
HD3A1003	D09	HD3100977	probe	FBgn0033029		Not3	201	CAGCGAAAGAAGGAGGGATT	TTGATCTTTCTCGCGCTTTT	CAGCGAAAGAAGGAGGGATTCACCTTTGAATACAAGTACTTAGAGGACAAGGAGCTGAATTGAAAATGTTGCGATGTTTGTTGCTTCGTCTGTCTAAAAGAAAACCAATCCATTAAAATAATAAAATAAATCAATCCAATTTTCATAAAAAATCACACAATCATAACACAAATCAAAATCGAAAAGCGCGAGAAAGATCAA
HD3A1003	D10	HD3101073	probe	FBgn0034008		CG8152	213	TCTTTTGGAATCCCTACCCA	AGTCCTCGATTTTTGGCAGA	TCTTTTGGAATCCCTACCCATTTTAGAGGAAACTAGCGAAGAGGATGAGTCAGTTGATGGCAACAACCCCTTTTACTGTGAAATCTGTAAGAGGGACTACAAAGAAACCCCCTGGCCAATTCATCAAACATCCACAGTGCATCAGTTCAATCTAAAGGCTCTGCCCGCTCATAAGCTCCACAAATTTAACATATCTGCCAAAAATCGAGGACT
HD3A1003	D11	HD3100978	probe	FBgn0262656	diminutive	dm	208	GTGGAATTGCCACTAGCACA	ATATTTACCTTGGGAGCCCG	GTGGAATTGCCACTAGCACAAGCTCCAACAGCAGTGTCCATCGGAAGGACTTTGTTTTGGGCTTTGATGAGGCCGATACGATCGAGAAGCGCAATCAGCACAATGATATGGAGCGTCAGCGACGCATTGGACTCAAGAACCTCTTTGAGGCTCTAAAGAAACAGATTCCCACAATTAGGGACAAGGAGCGGGCTCCCAAGGTAAATAT
HD3A1003	D12	HD3101074	probe	FBgn0033379	Mystery 45A	Mys45A	225	CCACACGTGCGTTTACTTTG	ATTCAGCGCAAAAACTTCCA	CCACACGTGCGTTTACTTTGCGAACCAAACAGAACGTGGTTGAAAATAATCGTAGTTTTTATACTGTTATAACGGCTCACCATGGTGCGGCCCAACAACAACCAGCTGCCGGAGAACCTTCCGCAGTTGCAGAACCTCATCAAGCGGGATCCGGAGTCGTATAGCGATGAGTTCCACATCCAGTACCAACACTTTCTTAGCTTGCTGGAAGTTTTTGCGCTGAAT
HD3A1003	D13	HD3100979	probe	FBgn0040232	CENP-meta	cmet	201	TAGCGACCCTTGATCAGGAA	CGTTAAATTCGAACAAATGCC	TAGCGACCCTTGATCAGGAATGTTAATGCAGCCCTGTGGGATAAGAACATAATGTGTTTCTGTTTTTATTTTTGCAGCCCTATTTGGAACTATGATAACAATCGATGAACCGATTTATCTATCGAGTCGTTAGCGCCACTCGAAGATATCGAAGCATATACATCCCTGATTTTGCAAAGCGGCATTTGTTCGAATTTAACG
HD3A1003	D14	HD3101075	probe	FBgn0014949	buttonless	btn	214	ACGCGAACGTCTACCAAGAA	TGGCTTGGAAGTTCTTGACC	ACGCGAACGTCTACCAAGAATCCTATTGCTACGAGGATATTACGAAATCGTGGCTGAACCAAACGGAGGGCTATACGGACTGCAGCTATGTATATGACCACAGTGCGTCTTCTTCCTACGCGGATTACAATAAACTAGAAACTAATTGGTGCAACGAAGCGAACGATCAATGGTTACAAAATGAGGCACCTACTGGTCAAGAACTTCCAAGCCA
HD3A1003	D15	HD3100980	probe	FBgn0002525	Lamin	Lam	223	CCAACGAGCTGAACAACAAA	ATCTCCTGCGAATGGATCTG	CCAACGAGCTGAACAACAAATACAACCAGGCCAACGCCGATCGGAAGAAGCTTAACGAAGACCTGAATGAGGCGCTAAAGGAGCTGGAGAGACTGCGTAAGCAGTTCGAGGAAACGCGGAAGAACCTGGAACAGGAGACACTGTCGCGCGTTGACCTGGAGAACACCATTCAGAGTCTGCGCGAGGAGCTCTCGTTCAAGGATCAGATCCATTCGCAGGAGAT
HD3A1003	D16	HD3101076	probe	FBgn0028693	Regulatory particle non-ATPase 12	Rpn12	204	CCCTACAACAATTGCCATCTC	CTTCACGAGCGCTACTTTCA	CCCTACAACAATTGCCATCTCTAAAAAAAAGCGAAAATCATCTTGGGAATTTGCAGAAAACATTTAAGCTTCAATATACCAATCTAAAGAATGGCCAACGTGGAATCGCTGTACAAAGAACTGACCGCCGAGTGGTCAAAGCGGCCACCAAACACCGTCAAATGCGGCCAGCTGCTGGATCAACTGAAAGTAGCGCTCGTGAAG
HD3A1003	D17	HD3100981	probe	FBgn0001994	cropped	crp	214	GGACGGATATCGCATCTTCC	TTAGCGCGTCCAAAAGTTCT	GGACGGATATCGCATCTTCCGATCGGAAAAATCGTACAGTGCAGCCAATTCGCCGTCTACAGAAATCTATTAGCGCGCGTGTGTTGGTGCCAGTGCGGTGGCAAATTAAAACAAAAAACATCTGCGAATTTGAATACGCAAATCTCATGCTCACTAAGAGCGCAAAAGTCATAGAGTGCAGAATAGTGAATTGAAGAACTTTTGGACGCGCTAA
HD3A1003	D18	HD3101077	probe	FBgn0086707	nucampholin	ncm	205	ATATGGGACTGGGCAAACTG	ATTTCAGCATTTATTGCGGG	ATATGGGACTGGGCAAACTGAATGCCAAGCTGAAGGATGATGTTTTGGTAGAGAGCATAGCTGGTTTGTTTCCCAAGGATAATCCACGGAATACCCGCTTCTCCATTAACTTTTTCACCTCGATTGGTTTGGGTGGTCTCACCGACGATTTGAGAAGATTCCTAAAAAACGCCCCCAAATCTGTGCCCGCAATAAATGCTGAAAT
HD3A1003	D19	HD3100982	probe	FBgn0021875	Zinc finger protein RP-8	Zfrp8	214	CCGTTCCCTGCCTAAAGAA	GGGTTGCTGTCCATTACAATC	CCGTTCCCTGCCTAAAGAAACTATGCGCCGCCTGCGGTTGCCATGCTCCTCACGCCTGCAGCAAATGCAAGGCAATCCACTACTGCTCACCAGAGCATCAAAGGGCCCACTGGCCACAACACAAGCCAAACTGCGGAGCACCAGAAGTAGCCACTGAGAAGCCCTTAACACAAATCGTTTTCCCAGAATTTGAGATTGTAATGGACAGCAACCC
HD3A1003	D20	HD3101078	probe	FBgn0029666		CG10803	207	GCTGTTGGAGGATATGCGTT	TCCAGATTGAGGGTAATGTGC	GCTGTTGGAGGATATGCGTTTGAGGAAGCCCAAAAAGGTGGTTAATCAGTTGGTACTACCTTCGTCACTCAAAAACAAGAATACATTTAAATTCCAGTGTGCAACTACTTCGTTCCAAAAGGCGAGTTTCCTGCATAGCGTCTACGAAATATCCTTTGGCCTGAACAAGGCACTCGGTAGGCGACTGCACATTACCCTCAATCTGGA
HD3A1003	D21	HD3100983	probe	FBgn0015240	Hormone receptor-like in 96	Hr96	201	CTTCTGCGAAGATATCTGGAGAGT	ACACGCATCGGTTGTCTAGT	CTTCTGCGAAGATATCTGGAGAGTGTTTATTCTGGCTGTGAGGCGAGAAACGCGTTTATCAAGCTAATCCAAAAGATTTCAGATGTGGAGCGTCTGAACAAGTTCATAATTAATGTCTATTTGAATGTTAACCCATCCCAGGTGGAGCCCTTGCTGCGTGAAATATTCGATTTGAAAAATCACTAGACAACCGATGCGTGT
HD3A1003	D22	HD3101079	probe	FBgn0039908	Asator	Asator	208	CCTAGCACATCGTCCGTTTT	TGCAACAGTTGTTTTCCTGG	CCTAGCACATCGTCCGTTTTAAGGAATAGGCTACCATCTCCTTTTAAAAAGGATTCAGCACTTCAACTTAATAGTACTAATGACAGTCTAGATAAATCGAGACATCGGAACAGCCTTCCCAATGTTTCAGTTAACGATATTTTTGACGACCTACAAATGAAACTAAATTTAGATTTAGGATCAGCGATCCAGGAAAACAACTGTTGCA
HD3A1003	D23	HD3100984	probe	FBgn0003870	tramtrack	ttk	202	CGCCTGCAGTCCCTACTTTA	GACCTCGGTGAGGCCCTT	CGCCTGCAGTCCCTACTTTAATACCCTCTTTGTAAGTCATCCGGAAAAGCATCCGATTGTCATACTTAAGGATGTGCCCTACTCGGACATGAAGTCGTTGCTAGACTTTATGTACAGGGGCGAGGTCTCAGTGGACCAGGAGCGACTCACTGCATTCCTGCGCGTGGCCGAGAGCCTGCGCATCAAGGGCCTCACCGAGGTC
HD3A1003	D24	HD3101080	probe	FBgn0014861	Minichromosome maintenance 2	Mcm2	207	GAAGCGGGTGTCCACTGTAT	GTGGTGAACTGGGATTGTCC	GAAGCGGGTGTCCACTGTATGACCCAGACGTTAACAGCACTGCTTATCGGAACTAGACCGCAGCCCTGAGTTGGCTCGATTAGCAAACATTTTCCCGCGCATTTTCGCACGCGTCGTCACAACAAGATCGGCGGTACAAAACAAAACATATTACAGATAAACGCTAAGCACAACAGACGCACGTAATGGACAATCCCAGTTCACCAC
HD3A1003	E01	HD3100793	probe	FBgn0031050	Actin-related protein 10	Arp10	205	CTCACCGAGGATCCGTTCTA	TATTATCGCACAGGTTGCTCC	CTCACCGAGGATCCGTTCTACGCCGAACGCTTCCATGGCGAGCTGCAGTTCAAGTTTTTCAATGCTGTCGGCAAGCAAAACTTTACTGCCTGGCTGGGCGGCGCCTTGTGCGGCGCGACGGATCTCATCCAGACACGATCGCTGGTCAAGGAGACGTATCTAAAGAGCGAGCACGTTCCCGACTGGAGCAACCTGTGCGATAATA
HD3A1003	E02	HD3100889	empty
HD3A1003	E03	HD3100794	probe	FBgn0033934		CG17385	201	TTTTCGAATGCATGGTGTGT	AATGTGTAGTCTCAATTATGATTTCGT	TTTTCGAATGCATGGTGTGTCGGGCCATCTTTGATACCTTCGCTGACTATGAGAAGCACGAAGCCAAGTGCCATGAGGACCACGAAAGGGCCCAGCTGGAGGTTAACCAGATGTCCCACATGCATCCAGACGACTATTTGCCCATGAAGTTTGCCGTGCCCGATCTGGATACGCACGAAATCATAATTGAGACTACACATT
HD3A1003	E04	HD3100890	probe	FBgn0263600	DNA-polymerase-delta	DNApol-delta	201	GTTCCAAGTTCGTGCATCCT	GTTTCTGCAGGCAGGAGTTC	GTTCCAAGTTCGTGCATCCTATTAAATTGGAATTCGAGAAAGTTTACTATCCTTACCTGCTGATTAACAAGAAACGCTATGCGGGATTATACTTTACGCGCCCAGATACCTACGATAAAATGGATTGCAAGGGCATAGAAACCGTGAGGAGAGATAACTCTCCGCTGGTGGCCAACCTGATGAACTCCTGCCTGCAGAAAC
HD3A1003	E05	HD3100795	probe	FBgn0086361	alphabet	alph	214	GCAGGATCACAAACCCATTC	GAACTCATCGCTATCCTGGC	GCAGGATCACAAACCCATTCTGCCGGAGGAGAAAGAGCGCATCTATAATGCGGGTGGCAGTGTTATGATAAAGCGCGTAAATGGTACCCTGGCAGTGTCGAGAGCCCTTGGGGATTACGACTTTAAGAACGTCAAGGAGAAGGGACAGTGCGAGCAGTTGGTATCGCCGGAACCGGAGATATTCTGTCAGAGCCGCCAGGATAGCGATGAGTTC
HD3A1003	E06	HD3100891	probe	FBgn0011205	fumble	fbl	88	CTTCGAGCCCAAGGACATAA	CGAGTTTTTGGTCAAGTAGCG	CTTCGAGCCCAAGGACATAACGCCGGATGAGCAGGATCGCGAGGCTGGCATTTTGCGGAATATCCGACGCTACTTGACCAAAAACTCG
HD3A1003	E07	HD3100796	probe	FBgn0036188		CG7339	221	CCTTCTTAACGTGGGATTATGC	CATGCGGAATGAGGATGTC	CCTTCTTAACGTGGGATTATGCATTGCGCTGAAGGATATTGTTTCACTGAAGGATTCCATCATCCTGCCGGGAGACGGAGCCTCGCACACGGAGGTTCTGTTCCGGTACGTGGTCTTCCGGCCGATGGTGGGCACCGTGATTACCGGAAAGATTCGAAACTGCAGCCGCGAAGGAGTCCATGTGACACTTGGTTTCTTCGACGACATCCTCATTCCGCATG
HD3A1003	E08	HD3100892	probe	FBgn0037141	DNApol-eta	DNApol-eta	210	ATCAGTGCCCCGAGTGTAAG	CGCTTGAAGATGCAGAAATG	ATCAGTGCCCCGAGTGTAAGGCTTTCATCAAGTGTGTAGACATGCCGGAACACTTAGACTACCACGTAGCCAGAAACCTTCAACGTGAACTAAACCAGCAGGATCTGCGAACTCGAACCGCAGCTCTGAATAAAGAAAAAATATCTCCAGTTCAGCCAAAGAAACAATCTCAGAAGAAACTGAACTCAACCATTTCTGCATCTTCAAGCG
HD3A1003	E09	HD3100797	probe	FBgn0020305	dribble	dbe	205	CTTACAAGGGCCTTCAGCAG	TTTTGCTTCTTGACCTTCGG	CTTACAAGGGCCTTCAGCAGGTGCGGGATATAGTCCTGGAGACCATGAACAATGTGCACCCCATATACAACATTAAGGCTCTGATGATCAAGCGGGAGCTGATGAAGGATCCGCGTCTGGCCAACGAGGACTGGTCCCGATTCCTGCCCAAGTTCAAGAACAAAAACATTAGCAAACGCAAGCAGCCGAAGGTCAAGAAGCAAAA
HD3A1003	E10	HD3100893	probe	FBgn0000228	Blastoderm-specific gene 25D	Bsg25D	201	ACAAACCTGAGGAGGGAGTG	TTATTGCTGCTGTGCTCTCG	ACAAACCTGAGGAGGGAGTGGTGCTCAGCATCGGCAGACATCGAACATGCACCTAACCATAGATCCTTATGAATGTTTAGACATATACAATTCTCGGTAGATTAAGTTTGCATACCCGTCGTATTCGTATTCGTACGTTGCGTTTTTTTTGTGAATGAATGTGAATCCATGTTGTTCGACACGAGAGCACAGCAGCAATAA
HD3A1003	E11	HD3100798	probe	FBgn0004087	Dihydrofolate reductase	Dhfr	82	ATTTTCAAGCTTATGCTTTCTCA	TTCCGAAATTCTCGCAAACT	ATTTTCAAGCTTATGCTTTCTCAGTAAGGATTAAGGATGCTTCGATTCAATTTAATCGTGGCAGTTTGCGAGAATTTCGGAA
HD3A1003	E12	HD3100894	probe	FBgn0037802	Sirt6	Sirt6	209	ACTTTGCAGATCGTTCCCAG	TGCTTTGTAGGATCGGAAGC	ACTTTGCAGATCGTTCCCAGCGGAGACCTTCCTTTAAAGAATCTAAAATGCGGTGGAAAATTTGTCATTTGTAATCTGCAGCCCACAAAACATGACAAAAAGGCTAACTTAATCATATCCAGTTATGTGGATGTGGTTTTGTCCAAAGTTTGTAAACTATTGGGTGTTGAGATACCCGAATATTCGGAGGCTTCCGATCCTACAAAGCA
HD3A1003	E13	HD3100799	probe	FBgn0003716	thickveins	tkv	220	TACTAAGGCCCCTTGCAAAA	TCAAAGAATGGGCGACTTAAC	TACTAAGGCCCCTTGCAAAATCTTTGGTTAGAAAAATGCTTTAACTATTTGAGAAATATAGGGAGTATTTTGGATGACACCTATTCATGTCGATGTACATAAATATGAGATCAAAACAAAAAATCAATCGAAAGAATCGAAATTTATATGTAACATACATTAATTTTTGTGCCAGCTTTTGTACGCTTTAACTAAACGAGTTAAGTCGCCCATTCTTTGA
HD3A1003	E14	HD3100895	probe	FBgn0033557		CG12325	202	GATGCGTTGAAGGAGGAATC	TGAAGGCTACCACCAAAACC	GATGCGTTGAAGGAGGAATCTACCAAGGAAGCCGAAGATGTCAACCATATAAAAAATGAGGACGAGACGAAGAGTCACCCCTTCTTTTACAAAAAAATAACTCGTCATTACTTGGCCGATGAGCCGCGAAAAGAACAGCGGGATGTACAACTGACCGCGGCAAACTACAACACTCGTACCAAGGTTTTGGTGGTAGCCTTCA
HD3A1003	E15	HD3100800	probe	FBgn0029905	Nuclear factor Y-box C	Nf-YC	212	CATATCGAAAGCATCGGGAG	GGAGGGTCAGCAATAAATTACAA	CATATCGAAAGCATCGGGAGGCATTGGAATCGGGCATTGGCAAGCGGGCATTGATTGCGCCATCCCCTGTCATCCAGCACAATGTATAATATTATAGTTTACGTAGGTGTATACGATTGTATATCGCGGGGGAGATTATATATAGCTAGTGTCTAAGTCGTAGGCATCTGTGTAGAAACGATTTCTCAATTGTAATTTATTGCTGACCCTCC
HD3A1003	E16	HD3100896	probe	FBgn0010575	scribbler	sbb	202	CTCCAGCTCCTCCAGTGGTA	ATCCTCGTTGGCCGAGTTAT	CTCCAGCTCCTCCAGTGGTAAATCGAGCGCAAAGATGTCCATAGACCACCAAGCGACGCTCGACAAAGGACTCAAAATGAAGATCAAGCGCACCAAGCCGGGCACCAAAAGCTCGGAGGCCAAACACGAGATTGTGAAGGCCACCGATCAGCAACAGAACGGAGCCCTGGGCGCCGGATCCAATAACTCGGCCAACGAGGAT
HD3A1003	E17	HD3100801	control_rho1	FBgn0014020	Rho1	Rho1	156	TTTGCAGAACTTCCAATGACG	CTCGATGTCGGCCACATAAT	TTTGCAGAACTTCCAATGACGACGATTCGCAAGAAATTGGTAATTGTCGGCGACGGTGCCTGCGGTAAAACTTGCCTTCTGATTGTCTTCAGCAAAGATCAGTTCCCCGAGGTCTATGTGCCCACCGTATTCGAGAATTATGTGGCCGACATCGAG
HD3A1003	E18	HD3100897	control_rho1	FBgn0014020	Rho1	Rho1	156	TTTGCAGAACTTCCAATGACG	CTCGATGTCGGCCACATAAT	TTTGCAGAACTTCCAATGACGACGATTCGCAAGAAATTGGTAATTGTCGGCGACGGTGCCTGCGGTAAAACTTGCCTTCTGATTGTCTTCAGCAAAGATCAGTTCCCCGAGGTCTATGTGCCCACCGTATTCGAGAATTATGTGGCCGACATCGAG
HD3A1003	E19	HD3100802	probe	FBgn0003346	Ran GTPase activating protein	RanGAP	222	CACCCTTCAGCAACCCTTT	GGCGAAGTTAAAGGTGGACA	CACCCTTCAGCAACCCTTTTGCCTTGAGCATCACTGTTTTTATTAGTGTGACCACCCTTGCCGGCAAATAATACCAAGCAATGCCAAAATTCTAGCGCCCATTTTTGCGAGGTTAAAATAAATTTCGCAAGCCGGCTGCAATCGCAAAGTACAGTGCGACTTATATACACTCGTATAAAATAATTCCATTTAAAAGCAAGCATGTCCACCTTTAACTTCGCC
HD3A1003	E20	HD3100898	probe	FBgn0028387	chameau	chm	219	CTTGGCTCCGAATTCTTGAT	GGCTGGCCTTAAGATCTACCA	CTTGGCTCCGAATTCTTGATTTCAACGATTTTATTTTTGGGTAGACATCTGAAGAACCACATCTCCAGTCCTTCCTTTGCATTTATCCTAGCGGATATATGCATTAATGTAGAATATGTTTTGTAACCACTTTCATAAACATGATACAATTGGAGAATGGTTTTTAGGGAGCTTGTAACTCAATTTTTTAATATTTGTTGGTAGATCTTAAGGCCAGCC
HD3A1003	E21	HD3100803	probe	FBgn0030241	fascetto	feo	207	CTGTCTAGCGTCATCGATTCA	CTTGCGTAAATGCTCACTGG	CTGTCTAGCGTCATCGATTCATTCAGTTCGAAATTTCGTGCAGTGATGCACTCTAAATAAACCACTAAATAAATCCGCACATTCCCGAGCAATCCTGCCCAGCGTTGTGGGTCTGCGACACAACTGTCAAGTTAACTCAGATATGCTGGTTAAATAGTCCCCAAGTGAACACAACGAAAAAACAAAGCCAGTGAGCATTTACGCAAG
HD3A1003	E22	HD3100899	probe	FBgn0264326	DNA polymerase epsilon	DNApol-epsilon	207	TCCGCAGGAGTTTACCATTC	AGGTAGGGTCCATCCACCTC	TCCGCAGGAGTTTACCATTCACACGAGCCATGAGAAGAAAAAGAAGATTAACATATCATATCCGAATGCAGTGCTAAACACTATGGTTAAAGATCATTTTACCAACGATCAGTACCACGAGTTGAGGAAGGATAAGGAAAACAATCTACCCAAATACGATATTCGAGATGAGAACTCTATATTCTTCGAGGTGGATGGACCCTACCT
HD3A1003	E23	HD3100804	probe	FBgn0026713	lethal (1) G0007	l(1)G0007	210	AGGACATCGAGGTGACGTG	TAACGTAGATGATGCCGTCG	AGGACATCGAGGTGACGTGCGAGGTGCTCGAGGAGCGACTGGCGGAGATCGATAATGCGCCGGCACTAAGCATACTGCCCATCTATTCGCAATTGCCGTCCGATTTGCAAGCAAAGATCTTTCAGAAATCCAGCGATGGATTGCGCAAGTGTGTGGTGGCCACGAACATAGCGGAAACATCGCTAACCGTCGACGGCATCATCTACGTTA
HD3A1003	E24	HD3100900	probe	FBgn0011726	twinstar	tsr	212	GCTCCTTCGATGCTCTCAAG	ACAAATTGGCGATCTCAACA	GCTCCTTCGATGCTCTCAAGAAGTCGCTCGTGGGCGTCCAAAAGTATATACAAGCCACTGATCTTTCCGAAGCCTCCCGGGAAGCCGTCGAGGAGAAACTCCGGGCCACCGACCGCCAATAAACTGTACGAGCACTGTGCATTGCATTTAACAAACAAGGCATGCATGAAACAGCGATGGAAACACGTATCCTGTTGAGATCGCCAATTTGT
HD3A1003	F01	HD3100985	probe	FBgn0011837	Tis11 homolog	Tis11	221	GGCGTAACTTCGTTGCAGA	TCGTTTGCTTGGATTGTTTG	GGCGTAACTTCGTTGCAGAATAAGTGTATATCAAGTATACGCCAAACACAGACACCCCTTAATTATGAACCGATCCTTGATATCAATTCTCTCATTGCTGTGACAGTCAAACGTAATCGTTATACAATAATCGTTATATGAGAAGGACCGAATTACGGACTACTACGGGACAATTAGTTAGATAGATACGTAAATGACAAACAAACAATCCAAGCAAACGA
HD3A1003	F02	HD3101081	empty
HD3A1003	F03	HD3100986	probe	FBgn0035370		CG1240	217	CATCTCAAGCCGCACTTTCT	AAGTGCATAATGTGCAAACCC	CATCTCAAGCCGCACTTTCTCGATTAGATCAGATCCGCCCTCCGATCCTCTCCAGATGCAAATATATGTGTATGCCTCTCCGCCAGCCTGGTTTACCAATCCCCTGTAACTTTCGGCTCCGCCTGGATTTGTTTGTTCCACAACCTTTGATTAAGATTTAGTTGACGCATGTGTTTAGCATTACCCTAATTAGGACGGGTTTGCACATTATGCACTT
HD3A1003	F04	HD3101082	probe	FBgn0039938	Sox102F	Sox102F	205	CGATAGCATGACCGACATTG	AAGGAACGGCATCAAGTTTC	CGATAGCATGACCGACATTGATGCGAGTGCTCAACAGCAACAACAACTTCAGAACGTGCAGAGACTGCAGCACGAAAGCTGCCTTCAGGAATTGCACAATCATCTGAGCAGCCAGTACGGGGCAGTTCGCTTTACTGCAGCAAACCCCCAACATCAAAATCAACAGGCAGTTTCCGTATCTTCCGGAAACTTGATGCCGTTCCTT
HD3A1003	F05	HD3100987	probe	FBgn0034065	Rrp42	Rrp42	208	CAGGCATTCCTTTCGGGTA	TTCATTACAAGACTTTGCCGC	CAGGCATTCCTTTCGGGTACACACTTGACCGGCGGCGGAGCCATGCACCGGGACACCATGCGCAACTGTCTGGAGCTGGGTCTGGCCATTGGCGAGCATCTGGACCGGCTGCTCACTAAAATGCTAAATCTGGAGCAGCAGCGCGTCGGACTCAAGCGACCGCAAATAGTAGGATTTCTTAAATAAAGCGGCAAAGTCTTGTAATGAA
HD3A1003	F06	HD3101083	probe	FBgn0038057		CG12267	207	ATGCCTAGCCGAGAATGAAA	TGTATCTTGGCCAGCAACTG	ATGCCTAGCCGAGAATGAAAACAAGGCAGAAAGTCCGGAGTCCTACCGCAACACCTTTCTCGAAATGATCACCGATCACTATATCATCAAGAGACCAGAACTGCTGGTGGGCGACGACCAGGATGAGAATGTGCCAAAGTTTGAGACCAACGAGTGCGATTTCTTTAGGCATCCCAATATTGATCTTCAGTTGCTGGCCAAGATACA
HD3A1003	F07	HD3100988	probe	FBgn0038951		CG5380	209	GAAAAGCTGGTGTACCGTGC	GCCTTGATGAGCTTCTTGGT	GAAAAGCTGGTGTACCGTGCCAAGGACCCGGAAAAGAAGAGTGCCCTGCCCAAGGATGCGGACAATGAGGAGAAGGTCGTCTACGGCATTGTTGAGGAGGGCGGCAACAAAGGCATCTGGATTAGGGATATACGTATGAAGTCCAACCTGAACATGATACAGCTCAACAAGATCCTCAAGAACCTAGAAACCAAGAAGCTCATCAAGGC
HD3A1003	F08	HD3101084	probe	FBgn0029979		CG10777	202	TTCACATGCAACTTTCTGCTG	CGCGAACTTCTCTTTTTGCT	TTCACATGCAACTTTCTGCTGAGCGCGTTTTTTTTTGTTATAAAAATCTAAAATACAAGAATTAGATTTAGCGAACTGGCTCCTAGTGTTTAACCAAGTACACCTTTAGTTAGCATTACGGTTACTTTCCCGTGGCGAAGGAATAATTGCAAAACCATTAGCTCTCGACAAAAGTTGTGCGAAGCAAAAAGAGAAGTTCGCG
HD3A1003	F09	HD3100989	probe	FBgn0261451	terribly reduced optic lobes	trol	216	CCGCAATGCCTACACGATTA	ACCTGACAGTGCACATCCAA	CCGCAATGCCTACACGATTAAAAACAGGCTGGAGATTGTGCGCGTGGAACAGCAAAATCTGGGCCAGTACCGCTGCAATGGAATCGGTCGCGATGGCAACGTTAAGACCTATTTCGTTAAAGAGCTGGTCCTTATGCCCCTGCCCCGAATCAGGTTCTACCCGAATATTCCGCTGACCGTGGAGGCGGGTCAGAATTTGGATGTGCACTGTCAGGT
HD3A1003	F10	HD3101085	probe	FBgn0030063		CG1789	206	CAACTGAACCAAACCCCATC	CTATTTCTTGCGTTCGTAGCG	CAACTGAACCAAACCCCATCAAACAGCAGCGCATCAACGAGCTGAAGAAACGCGAGCAGCGTGAAAGGGAACTCGGCATCGTCCAGCAGAAGATTCAGCTGAAGAACACCCTCAAGCAGCCACGCCTACTGAAGCCGAGGAAAATAAAGCCGGGAACCAAGGACAGTGCGCCCGTCTACAAATTCCGCTACGAACGCAAGAAATAG
HD3A1003	F11	HD3100990	probe	FBgn0036486	Msh6	Msh6	207	AAGAGGCAGCTATGCTGGAA	TTAAACGGTGGCAAATAATGG	AAGAGGCAGCTATGCTGGAATTTGATGTATACGAAGCTTTTTAAGACTTTTTCACCATTTCAGTATGCATTTTTTTTGTAGTTTTTATAAGGAATTTGAATCAAAACCTGTGCCATTCTCAACATTCTCAATTAAGCAAAATGGAACTATTCCATTTACAGCCCAGAAAACATTTTAAATTGTTTGCCATTATTTGCCACCGTTTAA
HD3A1003	F12	HD3101086	probe	FBgn0033475		CG12129	221	GAGTTGCCAGGCATCGATAA	GCATACAGAATGCGAGTGGA	GAGTTGCCAGGCATCGATAAGGAGCTTTTCACTCCGGAGTGCTGCATTCATCTTACCTTAGGCGTCTATGTGCTGCTAGATGACATTGAACGCCAAGAAGCCCTGAAGAATCTGGAATCATGTCGTCGTTTACTGGATGGCCTTAAAATACCTTTCCAAATTAAAGTTAAGGGCCTGGAGATTATGAACGACGATCCAAGCTCCACTCGCATTCTGTATGC
HD3A1003	F13	HD3100991	probe	FBgn0004378	Kinesin-like protein at 61F	Klp61F	213	CGCCAAGAACATTCAAAACA	AGCAGCAGCATTTTCTCGTT	CGCCAAGAACATTCAAAACAAGCCCGAAGTCAATCAGAAGCTGACCAAAAAGACTGTGCTCAAGGAATACACCGAAGAAATCGACAAGCTTAAAAGAGATCTTATGGCGGCCAGGGACAAGAATGGCATCTATTTGGCCGAGGAAACCTACGGGGAGATAACTTTGAAGTTAGAATCCCAGAACCGCGAGCTTAACGAGAAAATGCTGCTGCT
HD3A1003	F14	HD3101087	probe	FBgn0020386	Phosphoinositide-dependent kinase 1	Pdk1	221	AGCGTCTCGAGCAACAAAAG	GAAGTTTTTGTACTCCGCTCG	AGCGTCTCGAGCAACAAAAGACTGACAAGTGGCACGTTTTTGCCGACGGCGAAGTGATCCTCAAGAAGGGGTTTGTCAACAAGCGCAAGGGTCTGTTTGCCCGCAAGCGAATGCTCCTTCTGACCACGGGACCGCGACTCATCTATATCGATCCCGTGCAGATGATCAAAAAAGGAGAAATTCCGTGGAGCCCAGATCTCCGAGCGGAGTACAAAAACTTC
HD3A1003	F15	HD3100992	probe	FBgn0000043	Actin 42A	Act42A	82	AAAAAGTAGGCGTCGGTCAA	GGAGTAGTTTCTAGTTATCCGCTGC	AAAAAGTAGGCGTCGGTCAATTCAATCTTAAAGCGTCTGTCATTGTGCTAAGTGTGTGCAGCGGATAACTAGAAACTACTCC
HD3A1003	F16	HD3101088	probe	FBgn0032240		CG17768	208	CCTCCACTTCAAGCTCCAAA	TATGGCAAAAAGGACAGTCG	CCTCCACTTCAAGCTCCAAAATAAGGAATATCGAACTTTAGAATTGCCACTGTCCATGTTTCAACAAGTGCGCTATAATATTGCTCTCTTACTAAATGAATTGCAGTCATTGCAAAGCCGGTTGGCTTTAAAATAAGTTACATGTTTTTTTTATCCATTTGGTGAAGTATTTAATCCGACTGTCCCGCCGACTGTCCTTTTTGCCATA
HD3A1003	F17	HD3100993	control_rho1	FBgn0014020	Rho1	Rho1	156	TTTGCAGAACTTCCAATGACG	CTCGATGTCGGCCACATAAT	TTTGCAGAACTTCCAATGACGACGATTCGCAAGAAATTGGTAATTGTCGGCGACGGTGCCTGCGGTAAAACTTGCCTTCTGATTGTCTTCAGCAAAGATCAGTTCCCCGAGGTCTATGTGCCCACCGTATTCGAGAATTATGTGGCCGACATCGAG
HD3A1003	F18	HD3101089	control_rho1	FBgn0014020	Rho1	Rho1	156	TTTGCAGAACTTCCAATGACG	CTCGATGTCGGCCACATAAT	TTTGCAGAACTTCCAATGACGACGATTCGCAAGAAATTGGTAATTGTCGGCGACGGTGCCTGCGGTAAAACTTGCCTTCTGATTGTCTTCAGCAAAGATCAGTTCCCCGAGGTCTATGTGCCCACCGTATTCGAGAATTATGTGGCCGACATCGAG
HD3A1003	F19	HD3100994	probe	FBgn0030693		CG8974	109	CAGACCCTGTCCAAGCTGTT	GGTTCTTCTTATCGGGGTGA	CAGACCCTGTCCAAGCTGTTTTCGTATTTGGCCGTTGTGTGGATATTGTGGCTGTTCTATGCATAGCAATCTGCGAACGCATAAAGACATCACCCCGATAAGAAGAACC
HD3A1003	F20	HD3101090	probe	FBgn0265623	Suppressor of zeste 2	Su(z)2	212	AACACGAACACACACGCATT	GGTTTTTCTTTTTGCTCCCC	AACACGAACACACACGCATTATGCAAATATTGATAAACTTCTTCTTATATTTACGATATTCGTACACTCGAAAAAGGCTTTAGATTTTCGTACATTTATTCTCAACTTGCTCTTAGCTGATATTTTTTGTTTTGTTATCTTGTATATGGTCTGTACATATTTTAAGCAAAGAAAAAACTTTAAAGTTTATGAGGGGAGCAAAAAGAAAAACC
HD3A1003	F21	HD3100995	probe	FBgn0032634	Rpb11	Rpb11	87	AAGGAGAAGAAGGAGGGCG	GGAAGAAGAAGCTTTTATTGGG	AAGGAGAAGAAGGAGGGCGGCGATTAATCATATAATTACCAATTAATTCCTTAGTCTTATGAAAACCCAATAAAAGCTTCTTCTTCC
HD3A1003	F22	HD3101091	probe	FBgn0037894	Ranbp9	Ranbp9	210	ACTGGACGGATGACGATGAT	GGCATTTGACAATGATGTCG	ACTGGACGGATGACGATGATGTTAAAAGGAAAGCCAACGGTTGTATGGCCAGCGAGCAGGCCAAGCGAACCATACGAAACATTCTGCCAAACGGACTGTATGATCCCAATTCAAAGATACGCTCCTCAGTCGCGCATACCATCTCCACCATAGCCGCCACGGATTACCCACATTGTTGGGCGGAGCTGTTCGACATCATTGTCAAATGCC
HD3A1003	F23	HD3100996	probe	FBgn0039631	Sirt7	Sirt7	221	GGTGGAGCATGTGAAAACAA	GCTCTGGAAAACCATTGCTC	GGTGGAGCATGTGAAAACAAATGGGGAGGTTAAAACAGAGAAGGACTTAATCACGCTGGAGTCGTCCATTAAAATAGAGACTGAAGTTAAGCTGGAGAAATTAGAGTGCTCGGACACCAATTTTCAGCAGGAGTTGAAACTTTTGGAGCTGCTACCAAAGCTAGAACCACTTTCGCTCAAAGAAGAGACGGAGGAAACGCCGAGCAATGGTTTTCCAGAGC
HD3A1003	F24	HD3101092	probe	FBgn0014342	meiosis I arrest	mia	209	CTCCCAGAGGGCACACATTA	GGTCCACAATTTGGTAGCTAGG	CTCCCAGAGGGCACACATTACACAAAAAAGTCTAAAAACGCGGTTTATTAAATGAACAGTTTTATTTTTATATTAAGTAAGTTTGTACAAAATCAACAATGATGGGAAGTGAATCTGTGCTATTAGGGATATATTGTTTTTTAAGTGTATCCGGAGTGCAACCGTCAATGATGATTAACCTAATTAACCTAGCTACCAAATTGTGGACC
HD3A1003	G01	HD3100805	probe	FBgn0037369		CG2100	221	TACACGACCCTGCGTGACTA	GCCCACAAAAGTTTCAGTTCA	TACACGACCCTGCGTGACTATCAGAAGTTGTGCTTACAAAAGTACATTCAAAGGGATTTCGTAGAACAGTTGCTGAAATACTCTGGCAAACTGGAACTTTACAACCAGCTCAAGTCGTGGGTCAAGCCGGACTTCCCGATCAGGGGAAATGCTTTGGCTCAGCGTGGTCTGAACGGAATGAGGCTTGGTTTGGTGATGGATGAACTGAAACTTTTGTGGGC
HD3A1003	G02	HD3100901	empty
HD3A1003	G03	HD3100806	probe	FBgn0051852	Two A-associated protein of 42kDa	Tap42	205	GTCGGCATCTTGCACATTATT	AAATTCGCTGCCATTGAAGG	GTCGGCATCTTGCACATTATTTTCGCAATATTATTTATATTATTGAAAATACCCATTAACTATAAACTTATATCCAAATCTTTAAATGGCTGAGGGTAATACCGCTGGCGGAGAGGACCAAAAGCTGACGGACATCTTTCTAAAGGGCTGGAACATATTCGACGAGCTAGAAGTTACCGAACTGCCCTTCAATGGCAGCGAATTT
HD3A1003	G04	HD3100902	probe	FBgn0000546	Ecdysone receptor	EcR	209	AGGTGATGATGCTGCGTATG	CGAGAAGATCACAATGGCAG	AGGTGATGATGCTGCGTATGGCACGACGCTATGACCACAGCTCGGACTCAATATTCTTCGCGAATAATAGATCATATACGCGGGATTCTTACAAAATGGCCGGAATGGCTGATAACATTGAAGACCTGCTGCATTTCTGCCGCCAAATGTTCTCGATGAAGGTGGACAACGTCGAATACGCGCTTCTCACTGCCATTGTGATCTTCTCG
HD3A1003	G05	HD3100807	probe	FBgn0031652	jetlag	jet	211	GAGCAGTGGACGCTTTGAC	ATCACGTTGATGTGCTCCAG	GAGCAGTGGACGCTTTGACGCTGCACCAAAGCAAGCTGGTGGAGTTCGACATCTCCTATTGCGGCGCAATTGGAGAGCGCTGCTTGATTATCTTCTTCAGGAAACTTAACAAGCTCACCGTCCTGTCGCTGGCAAATACGCCCAGTGTCACCGATCAGGTGCTCATCCAAATCGGGAACTATTGCCGCGAACTGGAGCACATCAACGTGAT
HD3A1003	G06	HD3100903	probe	FBgn0026401	Nipped-B	Nipped-B	208	TTCAGCAACAAGAAGCCAAT	TCAATTGAAGAGTGGTGTGCTT	TTCAGCAACAAGAAGCCAATTATAATTTAAAACATGATTTAAACCAAGTATCAACAAATGTTGGTCAAATTCAAAATATTTCTGATACTTTTCCCCAAGAGCCGTCAAATTTTAATTTAAATTCTGTAAATATCCCAAACATGTTATATGTACAAAGTCCACCTTTCACTGAATCAGAACCAACTCAAGCACACCACTCTTCAATTGA
HD3A1003	G07	HD3100808	probe	FBgn0000629	Enhancer of zeste	E(z)	214	GGTGCGCAAAAGAATGAGTT	CCATCATAACCTTGGCATAGC	GGTGCGCAAAAGAATGAGTTCATTTCGGAATATTGTGGCGAGATCATATCCCAAGATGAAGCCGATCGCCGTGGCAAGGTTTACGACAAGTACATGTGCTCATTTCTTTTCAATCTGAACAACGATTTTGTTGTGGATGCCACTCGGAAGGGCAACAAGATTCGGTTTGCCAATCATTCCATTAATCCCAATTGCTATGCCAAGGTTATGATGG
HD3A1003	G08	HD3100904	probe	FBgn0036398	upSET	upSET	203	CGTTCGAAACAACGTCGC	TATTTTGAATTTTCACTTCATTTTGC	CGTTCGAAACAACGTCGCGCCATCACTTAAATGCTGCAAATCAACAATGTGCAACGGAACAAAAAAGAACCAGTGTTAAAGTGTATACAAATTTAATTTGTATTTATAAAATTGAAATATAAAGTTTCGAAATAAAAAATAAACCACGTAGCTTGTCGTTAAATTAAATTAAGTTGTGCAAAATGAAGTGAAAATTCAAAATA
HD3A1003	G09	HD3100809	probe	FBgn0260768		CG42566	95	CCCCCATTACTTATCCCCAC	CCGGCACTACAATGATTTGTT	CCCCCATTACTTATCCCCACTTGATCTATTTTTAACTCTCTCACATTTATTACTACGCACTATTTTGATAACAAAACAAATCATTGTAGTGCCGG
HD3A1003	G10	HD3100905	probe	FBgn0030061		CG1785	202	GGACGAGGAGGAGGGTAGTG	CGTCTGTTGCTTGAGCTTCC	GGACGAGGAGGAGGGTAGTGAGCTCGATGAGGATGTCCAAACGAATGGGAAGAAAAAGGAGGACGATGATGAAAAGCCATATCACACAATCAACGCTCCCGTGGAGAACAAAAAGAAGAGCAAGCAGGCTCGCCGCAACGAGCTCAAGCAAAAGGAGCTGGCGCGTCAAACAGAGCTCAAGAGGAAGCTCAAGCAACAGACG
HD3A1003	G11	HD3100810	probe	FBgn0025641	Dishevelled Associated Activator of Morphogenesis	DAAM	203	CCACTTCCAGGTCTTCGCTA	TACCGAGCATGAGAAACTCG	CCACTTCCAGGTCTTCGCTACGGAACGCACCCGTTTCCAGAGCATTGTCAACGACCTGGACCGCTCGACCTATGCGTACAGGGACAATGTCAATCTAAAGACCGCCCTTATGTCATTCGTAAATGCGGTGCTTAATTACGGACCTGGACAGGAGAACCTCGAGTTCCGACTGCACTTGAGGTACGAGTTTCTCATGCTCGGTA
HD3A1003	G12	HD3100906	probe	FBgn0037087		CG7519	202	ATCGGGAGGGACTCAACG	TTTAAAGGCGGTCGTTATATTTTT	ATCGGGAGGGACTCAACGATGAGGCTTACGAGAAGCACAAGCCCGCCAGAAAGGTACCCGAAGAGGAACAGTAATCCCTCGCTCTAGCTTAGATTAAGTTGTAAAGACTGGATGCATATTTAGCTGCAGTTCGTCTATCTACTTTAGTAAACAATCAAATTATTTTTATACAAAAAATAAAAATATAACGACCGCCTTTAAA
HD3A1003	G13	HD3100811	probe	FBgn0003978	valois	vls	208	CCATCTTCCACGTGCCTCTA	TTAATAACTGGGCGACATGG	CCATCTTCCACGTGCCTCTATGCGGATGCCAGCCACGTGCTGAGCTTCACCAGTGCCGCCTGGGCAGCTGCCTCGGAGCTGCAGGGTGACAATCACATCTATCTCGGGGACTATGACGGCAAAGTTCATACTCTGGACATTCGAGTGCCACGAAAACTGGCGGAAACCAGGGAATACTTCGACAAGGGCCATGTCGCCCAGTTATTAA
HD3A1003	G14	HD3100907	probe	FBgn0027784	Prp18	Prp18	218	CCAACTACAGCAAGCACGAA	GTTTCCGATGGCCATTTCTA	CCAACTACAGCAAGCACGAAAAGATGTCCACAAAGGTGAAAATGACCCGCGTCATTTACACGCAGACTAAGGAATACGTTAAGCCGCTGTTTCGCAAGTTAAAGCATCACACCCTGCCAGAGGACATTCTGGACAGTCTGCGAGACATCTGCAAGCACCTGCTCAACCGCAACTATATCACAGCAAGCGATGCCTACCTAGAAATGGCCATCGGAAAC
HD3A1003	G15	HD3100812	probe	FBgn0026373	RNA polymerase II 33kD subunit	RpII33	203	ACTGGAGGACGACCAGTACG	ATGTAAATCAAACGGCCAATG	ACTGGAGGACGACCAGTACGAGGCGCCCTACAACTGGGAAGCCAAGCCAAACAAGTTCTTCTTCAACGTCGAATCCGCCGGTGCCCTTAAGCCTGAGAACATTGTGGTCATGGGTGTGCAGGTGCTGAAGAACAAGCTGTCAAACCTGCAGACGCAACTCAGCCACGAGTCCCAAAACGATGCATTGGCCGTTTGATTTACAT
HD3A1003	G16	HD3100908	probe	FBgn0261268	Cullin-3	Cul-3	201	GGCAACACGAATCCCATAAC	GCCACCCTTTTTCAGTTTGT	GGCAACACGAATCCCATAACATTCGTGCAGAACTTGCTGGATCTCAAGGACCGCTTCGACCAGTTTCTGGTGCACTCGTTCGCCAACGATCGCATATTCAAAAACGTCATCTCATCCGATTTTGAACATTTCTTGAACCTAAATAACAAATCCCCGGAGTATCTATCGCTATTCATCGATGACAAACTGAAAAAGGGTGGC
HD3A1003	G17	HD3100813	probe	FBgn0261565	Limpet	Lmpt	180	ACCTCGGGAGGTGTTACCTA	TGTTATGGGCTTCACACAGG	ACCTCGGGAGGTGTTACCTACAAGAACGAGCCGTGGCATCGCGAGTGCTTCACCTGCACCCACTGCAACATCACGCTAGCTGGCCAGCGATTCACCAGCCGCGACGAGAAGCCCTATTGTGCGGAGTGCTTTGGCGAGCTCTTTGCCAAAAGGTGCACGGCCTGTGTGAAGCCCATAACA
HD3A1003	G18	HD3100909	probe	FBgn0004919	goliath	gol	217	CGGAGATACAGGGGCAGTCT	CCCCCTCACTCACAAACAAT	CGGAGATACAGGGGCAGTCTATTAAAAGAATACACATATCTGAATACATATATTTTAATCGCGTTCGCGTAACAAAAGCCAAATAGATAAGATAGCTACAACAAAAATTATTTCGAAAATGCGTCGAGAAAATTAAGAAATGCAGATATATTTCAATAGTGCTATAGGGAAGATGTATCTACTGTTTTCTTACATATATTGTTTGTGAGTGAGGGGG
HD3A1003	G19	HD3100814	probe	FBgn0010109	deadpan	dpn	212	AACGCGTACCGCTTGTTAAG	CGTCGTCGGAATTAATATCGTT	AACGCGTACCGCTTGTTAAGTTTTTGTTGTTCGGACATTACTAAGAAGTACGTGCAATAATTGTTATAACTATTTTCGTACTCGAACCAAAGTTATTGTGTTGTGAAAAAGACCAAATCGAAATCGAACTATCTTGGATTATCTCCCACTTGGATATACAAATTAAAATCGTTACAAAATGGATTACAAAAACGATATTAATTCCGACGACG
HD3A1003	G20	HD3100910	probe	FBgn0020616	Stromalin	SA	210	AGATCGTCGTGCTTCTGACC	TCGTCAAGAAAGTTTTGCGG	AGATCGTCGTGCTTCTGACCGTTTGGACTCGCTTATGACTAAACGTTCCGAATTGGAAGAGAATATGGACGAGATAAAGAGCATGTTGACCTACATGTTCAAGTCGGTGTTCGTTCACCGCTACAGAGACAGTCTGCCTGATATACGAGCCATATGTATGGCCGAGATCGGCATCTGGATGGAAAACTATCCGCAAAACTTTCTTGACGA
HD3A1003	G21	HD3100815	control_pvr	FBgn0032006	PDGF- and VEGF-receptor related	Pvr	175	AGGTATCCATCTGACGGTCG	AAGTACGCCAATGTCGGTTT	AGGTATCCATCTGACGGTCGTAGCTGTAGGTGGCTGTTCCGGATCCGGTTCGTCCGGCTCGGGTGCCCGATCGGGGATCATTGTCCGAATTTCTGCGATGAGTTGGCGGTTGCGTGTTATTGTTGTGCGGCTCATTAATGTAAGAGTGGATCGGGAAACCGACATTGGCGTACTT
HD3A1003	G22	HD3100911	control_pvr	FBgn0032006	PDGF- and VEGF-receptor related	Pvr	175	AGGTATCCATCTGACGGTCG	AAGTACGCCAATGTCGGTTT	AGGTATCCATCTGACGGTCGTAGCTGTAGGTGGCTGTTCCGGATCCGGTTCGTCCGGCTCGGGTGCCCGATCGGGGATCATTGTCCGAATTTCTGCGATGAGTTGGCGGTTGCGTGTTATTGTTGTGCGGCTCATTAATGTAAGAGTGGATCGGGAAACCGACATTGGCGTACTT
HD3A1003	G23	HD3100816	probe	FBgn0265487		mbl	204	GCGGAAAAGTGAATTATACCAGA	ATTTTTGACAAATTTTTCCGC	GCGGAAAAGTGAATTATACCAGAGCCTGCCTGAAAAACTCAAGAAAACCCCATCAAAGAAATAGCAGCTCTCAGCTAAATAATAACAAACACAATACTTTCTGCTCAGTCACCGCAAACAGAAATAATCACAATTCTGCAAAACGCCGTCATCAAAAAAGTTTTAGCCTACAACTCTAGAAACGCGGAAAAATTTGTCAAAAAT
HD3A1003	G24	HD3100912	probe	FBgn0032244	Replication factor C subunit 3	RfC3	205	CCATTTTCTGCGACACCTTT	TGATCCTGGGATAATGGAGC	CCATTTTCTGCGACACCTTTAAGCTGATCATTTTGGACGAGGCCGATGCCATGACCAACGATGCCCAGAATGCCCTGCGCCGCATAATTGAGAAATATACGGACAACGTGCGCTTCTGTGTGATTTGCAATTATTTGAGCAAAATCATTCCGGCGCTGCAGTCGCGTTGCACCCGTTTTCGGTTCGCTCCATTATCCCAGGATCA
HD3A1003	H01	HD3100997	probe	FBgn0027508	tankyrase	Tnks	216	CTGCACAATGCCTGCTCTTA	TTCCTTAACCAAATCCGCTG	CTGCACAATGCCTGCTCTTATGGGCACTATGAGGTAACCGAACTGCTGGTCAAGCACGGAGCCAATGTAAATGTATCGGATTTGTGGAAGTTTACTCCTCTTCATGAAGCTGCCGCCAAGGGAAAGTATGATATTTGCAAGCTGCTCTTGAAACATGGCGCTGATCCAATGAAGAAGAATCGGGATGGCGCGACACCAGCGGATTTGGTTAAGGAA
HD3A1003	H02	HD3101093	empty
HD3A1003	H03	HD3100998	probe	FBgn0028978	tribbles	trbl	207	TAATCGGAGACTAAACGGCG	TGCTGTTTTGACCGCTACTG	TAATCGGAGACTAAACGGCGCGTCGCTAAATGTCAAAACAATTAACAGCCAAGTACAGCCAGGCTAAAGCGGAGTAACAAAATTAGTAAGAAGAAGCATTAGCAGAGAATAAGACGAAGAAAACGTAGCGAGAGCAAGAACTGTGATAAAGTTAAGTGAAGTGGTAAACACAAGCAAGCATGGATAACAGTAGCGGTCAAAACAGCA
HD3A1003	H04	HD3101094	probe	FBgn0027592	Mediator complex subunit 15	MED15	209	CCACTTTGGAGCTGCTCTTT	ATCCAGGCAACAAATCAAGC	CCACTTTGGAGCTGCTCTTTGGTACGGATATAACAGCTCCAGTGCCCGCAAAGCGACCTCGGGTGGAAGAAAAGTCCACGTCTTTTGAGCAGGAAGTGCCACATGTGCTTCAAGGGGAAATTGCTAGGCTCGATACCAAGTTTAAAGTGAAATTGGACACCACGTCACAGATCAACAACAAGGCCATTCGCTTGATTTGTTGCCTGGAT
HD3A1003	H05	HD3100999	probe	FBgn0026079	NOP2-Sun domain family, member 2 ortholog	Nsun2	203	GGCGAGAATGATCCTGACTA	CAGCGCACGAATGTCTTAAC	GGCGAGAATGATCCTGACTACCAGGCGATCAAGGAGTTCTACCAGCTGGACGAATCCCTTAGTCAACGATGTCTCTTAACTCGCTGTGTCACGGAGAAAAAGAAGAACATCTATTACTGCTCTGAACCCATCCGCGATTTGGTGCTTAACAACGAAAACAACATTAAGATCATCAACACGGGCGTTAAGACATTCGTGCGCTG
HD3A1003	H06	HD3101095	probe	FBgn0037262	Mediator complex subunit 31	MED31	89	GCAGCAGCAGCAAATCAAT	TTTATTGGTAAACTTTTAGTTGCCAG	GCAGCAGCAGCAAATCAATGGCGTGGCATCGGGGGCCAACATAAAACTAGAGTTAAACTAGCGCTGGCAACTAAAAGTTTACCAATAAA
HD3A1003	H07	HD3101000	probe	FBgn0028397	Tob	Tob	204	TAAACGAACGCATAAAGGGC	CTTATCACTTTCGCTTCACGG	TAAACGAACGCATAAAGGGCACAAAAGCCCACTTTTCCAAATTGCCGTCAATGTGTTGATGATCTACAGAAACCGTCTTTGAACGCTCTTAATCAGTAGGATATCGCCATAAACTGCACTCCCCAACGACAGGCAGCGATCCGGAAACAGATCGGCTAACATAACCGGATTCCGAGCCGGAGTCCGTGAAGCGAAAGTGATAAG
HD3A1003	H08	HD3101096	probe	FBgn0035720		CG10077	217	GTCAGCTACCTGGCCCAAAG	GGTTTCCACGAAAATGATGG	GTCAGCTACCTGGCCCAAAGAGGTGCGCCAGCTGGCCGAGGAATTCCTTAATAACTACATACAGGTGAACATTGGTTCGCTTTCGCTGAGCGCCAATCACAACATCCTCCAGATCGTGGACGTGTGCGATGAGAATGAGAAATTGATGAAGCTGATCAAGCTGCTAACAGACATCTCGGCGGAGAACGAGACCAAGACCATCATTTTCGTGGAAACC
HD3A1003	H09	HD3101001	probe	FBgn0032216		CG5384	210	GTACAATTCGTGCGCTTTCA	CTCTTCGTTGGGTTCATTGC	GTACAATTCGTGCGCTTTCAATACAAAGGAAAGGAGGGCATAAATGCCAAGGTGTTGAAGGATATCAAATTCCCCATTGACTTCGATGCCTTTGAGTTGTGTACCCCCGAATTGCAAAACAAGCTCTGCCCAATGCGTTCGAAATTCAAGGATCTGGAAGACAAGAAAATGGAAGTTGACGTTGTCAAACGCAATGAACCCAACGAAGAG
HD3A1003	H10	HD3101097	probe	FBgn0036448	myopic	mop	222	CCATTCGAGCAGTTTTGCAT	AACAATTTCGCAATGGTGGT	CCATTCGAGCAGTTTTGCATTCCAATCCGAAACTTTTACGGACGAAAAAACGACAAAATATTTCCAAAAGGAGGTGGAGAGCTATGAAAAATTACTAGAGAATTTGCACGTGAAAATGTTGAATGGAAAAACACAACTGGGCGCCAAATGGCAAGAGCTGCAGCAAAAGTTGGATAAAGAAGCCGCTGCCAACAAGCGATCCACCACCATTGCGAAATTGTT
HD3A1003	H11	HD3101002	probe	FBgn0039635		CG11876	210	CGGCAACGATAGCGATAGAC	CTCGCCCAGGATGAAGAC	CGGCAACGATAGCGATAGACCCATAGGAAAGCGAACCGCAAACCGACGATGCTCCGAACCCGACTCATCCAGGCGGCCAGCTCCGCCCAGCGAGCGTTCTCCACCAGCCAGAAGGCCCTGGCGGCCAAGCAGATGACCGTGCGAGATGCCCTCAACAGCGCATTGGACGATGAGCTGGCCCGCGACGACCGCGTCTTCATCCTGGGCGAG
HD3A1003	H12	HD3101098	probe	FBgn0260399	greatwall	gwl	223	GACGCGCTGTTTTAAATGTG	GGGTTTTGTAGTCGATGTGGA	GACGCGCTGTTTTAAATGTGTGTTTGAAATAAAAATTGTGCAATAAACAAGCTAATAGCATTCAGGTCTATATCGAATTCTATACATTGTATATCTCTGTACGATAATTGTATATATTGTGCGAAACCGCGAGAAAATCGCACTCTGACCGTCGGAAACCTGGAAGATATGGAAAACGCCGATGCGACTTCGCAATCGGATGTCCACATCGACTACAAAACCC
HD3A1003	H13	HD3101003	probe	FBgn0027495		CG8378	201	TTCCCTCTGTGCTGGGTTAT	AATGTTCTTTTGGCCCACTG	TTCCCTCTGTGCTGGGTTATATATTCGCAGGCTATACTCCACACTGCTTCCAGCGGAATCGTCAAAAAAATAACATTAAAATCGCCGTGTGCATAATTAGAATATTTCCGAATAGTAATCGCCCGTGAAATCGCTAATTAGCGGTCAGCACTTGCGCCAGTTAAAGAAATCGCGGCACCGGCAGTGGGCCAAAAGAACATT
HD3A1003	H14	HD3101099	probe	FBgn0011236	ken and barbie	ken	207	CAGCAGGAAAAGCCAAAGAG	GTTGGATGTTCAGCAGTTGG	CAGCAGGAAAAGCCAAAGAGAAATTTTAAAATCTGCTCCTGTGAAAATATAAACAAACCATGGTCAATGAAATCGAAAGTTTCCACTAAGCAAGCAGCCAGCAGTAAATGGCCGATCGCAGGGATTAGGCGATCAGAACAGAAAGTGCGCAAGTGAATAGCAGTGACTATATTCATCCTGGGATTAACCAACTGCTGAACATCCAAC
HD3A1003	H15	HD3101004	probe	FBgn0001104	G protein alpha i subunit	Galphai	201	CTGTGAACTTCGGCAAACAG	GCACACACACTGGCTTGAAA	CTGTGAACTTCGGCAAACAGTCACACCAATCCGACGCGAAGTGAATCATATTGCGCACAGCAAAATCAGCGGATAAGCAAATTAAAGCGACAAAAGAATATTAAATCGGCTCTGCCGCTGCAGCAAGAAGCGTGAAAACAGCAATGCAATCGGGCTAATCTCCAAAAAAAACCCAAAAACGTTTCAAGCCAGTGTGTGTGC
HD3A1003	H16	HD3101100	probe	FBgn0037382	Hpr1	Hpr1	208	CCTCAACATCGTCTCCGAAT	CTTCCACTGCGGCTTATTGT	CCTCAACATCGTCTCCGAATTCAACCTGGACAACTTTACGGAGTACGGTCTGGACAGCAAAGACCACGACGAAAGCGACAACAAGGAGCTGGAGGATACCGCTGAGGACATCCCCCTAAAGATCGACTACGACCTGTACTGCAAGTTTTGGTCGCTGCAGGACTTTTTCCGAAATCCCAACCAGTGTTACAATAAGCCGCAGTGGAAG
HD3A1003	H17	HD3101005	probe	FBgn0030121		Cfp1	203	TGCCATCAAGCATATGGAGA	AACCACACACATCCGTATCG	TGCCATCAAGCATATGGAGAAGTGCTTCAACAAATACGAATCGCAGGCCAGCTTCGGGAGCATATTCAAAACGCGAATGGAGGGAAACAATATGTTTTGTGATTTCTACAATCCGGCAAGTAAGACTTACTGTAAGCGATTGAGAGTATTGTGTCCGGAGCACAGCAAGGATCCGAAGGTGAACGATACGGATGTGTGTGGTT
HD3A1003	H18	HD3101101	probe	FBgn0025140	pitchoune	pit	214	TGCTCTTCACGTTCCTCAAA	GCAGCCACATCCGTACATAA	TGCTCTTCACGTTCCTCAAAAAGAATCGTAAGAAGAAGGTGATGGTGTTCTTCTCGTCCTGCATGTCCGTCAAATACCACCACGAGCTCTTCAACTACATTGATCTGCCAGTGACCTCCATCCACGGTAAACAAAAGCAAACGAAACGAACGACCACCTTCTTCCAGTTCTGCAACGCGGAATCTGGGATTCTCTTATGTACGGATGTGGCTGC
HD3A1003	H19	HD3101006	probe	FBgn0035106	rhinoceros	rno	210	CCTGTCGAGCACTTACCCAT	CTTTGTTTTGCGCAGTTTCTC	CCTGTCGAGCACTTACCCATCGTTGAGACAATACTTGAGATGGAGGACAGTAAGTTTGCTAACAACTTCGCGTCAAACTTAGCCAGTGTGTTAAATCCTCCCAATCAGATGAGTCTAATCGGGTCTAGTATAGACAGGAGTAAGCAAATAAGTGAGGAGGATAGCATCCAAGCAACCCGAAATCTCTTAGAGAAACTGCGCAAAACAAAG
HD3A1003	H20	HD3101102	probe	FBgn0036263	thoc6	thoc6	216	CGCGTGCATCTATGTGACTT	GAGGAAGCGAAAATCCTTGA	CGCGTGCATCTATGTGACTTTGTGGACGATTGTGTCTTAATCGGTGGAGAGCACAATCATGTGCAATCCTACACTCTAAATGGAGTACTGCAAGCCAATATTCCCGTGGAGCACACTGCCTGCTACTCTGCTGTTTGGCAAACATCGCCCATTAAATTCATTTCCATTGCTGGTTTCAGCAACAAGTTGCATATCCTCAAGGATTTTCGCTTCCTC
HD3A1003	H21	HD3101007	control_pvr	FBgn0032006	PDGF- and VEGF-receptor related	Pvr	175	AGGTATCCATCTGACGGTCG	AAGTACGCCAATGTCGGTTT	AGGTATCCATCTGACGGTCGTAGCTGTAGGTGGCTGTTCCGGATCCGGTTCGTCCGGCTCGGGTGCCCGATCGGGGATCATTGTCCGAATTTCTGCGATGAGTTGGCGGTTGCGTGTTATTGTTGTGCGGCTCATTAATGTAAGAGTGGATCGGGAAACCGACATTGGCGTACTT
HD3A1003	H22	HD3101103	control_pvr	FBgn0032006	PDGF- and VEGF-receptor related	Pvr	175	AGGTATCCATCTGACGGTCG	AAGTACGCCAATGTCGGTTT	AGGTATCCATCTGACGGTCGTAGCTGTAGGTGGCTGTTCCGGATCCGGTTCGTCCGGCTCGGGTGCCCGATCGGGGATCATTGTCCGAATTTCTGCGATGAGTTGGCGGTTGCGTGTTATTGTTGTGCGGCTCATTAATGTAAGAGTGGATCGGGAAACCGACATTGGCGTACTT
HD3A1003	H23	HD3101008	probe	FBgn0023216	Poly(ADP-ribose) glycohydrolase	Parg	214	GGCGGTGACTCCTATCTGAA	GCTCCTTGGAGCTCTTCTCC	GGCGGTGACTCCTATCTGAAAGCCCTGCTGCAACTTATGGTCTGCGCCCAGTTGGGCAGACCTTTGGCCTACTATACCTTTGGAAATGTGGAGTTTAGGGATGATTTTCATGAAATGTGGCTGTTGTTTCGAAATGACGGGACTACGGTGCAGCAGCTTTGGAGTATTTTAAGGTCGTACAGTAGGCTTATTAAGGAGAAGAGCTCCAAGGAGC
HD3A1003	H24	HD3101104	probe	FBgn0015527	penguin	pen	214	GGAGCACCTGCTAAAGATCG	AATGAACTCTGGATGGAAGCA	GGAGCACCTGCTAAAGATCGCCAACCATGAGCACGGCCACGTGTTCCTCATCTCGCTGCTAAACGCACTGGACGACACTAAGGCGACCAAGAAGGCAATTTACGATCACCTACACGGAGATCTAAAGGCGCTAATGAGCAGCCCGTACGGCCGACGAGTGATTCAATGGCTGGTGGCTCCGGGTGATACGACATGCTTCCATCCAGAGTTCATT
HD3A1003	I01	HD3100817	probe	FBgn0036386		CG8833	224	GCTGAAAAGTGGGTGGAAAA	GCCTTGTGCTTGGATTCTTC	GCTGAAAAGTGGGTGGAAAAGAAATGCATATCCGGCAGCGAAGATAGCGATGCTAGTTCTAGCAACGAATCCTCATCATCCGATTCTTCTGATGACAATGACAAGAGATCCAAACTCAGTAAGCCCAAGAAATCGCACAAGGGCTCCAGCTCGAAAAAGTCTAAGAAATCGAAGCTGAAGTCCAAGAAAAAATCGAAAAAGAGCGAAGAATCCAAGCACAAGGC
HD3A1003	I02	HD3100913	empty
HD3A1003	I03	HD3100818	probe	FBgn0263391	hu li tai shao	hts	207	ATGCTGCCCGTCCAGATATT	GAATCACCTTGGAGTTGGGA	ATGCTGCCCGTCCAGATATTCGATGCGCCATCTATATCGGCTGCAGTCCAGTCGTGGCTATTTCCTCACTAAAGACGGGTCTATTGCCCTTGACCAAGGATGCCTGTGTGCTGGGCGAGATCACCACTCACGCTTATACTGGTCTATTCGACGAGGAGGAGCGCAATCGATTGGTCCGCAGCCTTGGTCCCAACTCCAAGGTGATTC
HD3A1003	I04	HD3100914	probe	FBgn0038961		CG13850	210	TGGTGTCACAGCTACCTCCA	GCAGTTTGTAAATGATTGCTGG	TGGTGTCACAGCTACCTCCAAAATGAGGCTACTCAACTTGAATAGCTATGCCCAGTTAATAGCCACAGATTACAAGGGTCCACTATTGCCCACTGACAGTCCTGTCTATCAGGTGCCCATGGCTCATCCTAAAGCAAAGCAAGTGCTTGTAAATGGAATGCTAGATGCCCTGAAAAGTCTGCTGCCGGCCAGCAATCATTTACAAACTGC
HD3A1003	I05	HD3100819	probe	FBgn0034351		CG5190	204	AAGGAGCGCGAGGAGAATAC	CATCAATTGCTTTGCTGCAT	AAGGAGCGCGAGGAGAATACGCACATTATCTATGGCCTGGGACACACATCGTTGTTTCTGCGTATCTATGATACCACTATTAATCACTGGCAGAACAACCGACTCACACGGGCCATGCAGTTTGCCCCCAAAATGGTTTTGGATTGCTCCTACGATGAGCACATGAACAATCGGGAGGCTACCTATGCAGCAAAGCAATTGATG
HD3A1003	I06	HD3100915	probe	FBgn0013347	Transcription-factor-IIA-S	TfIIA-S	212	GTGAAGATCGTGGCCTGC	TGTATTTCTTGCAATGCCTGC	GTGAAGATCGTGGCCTGCGACGGCAAGAGCGGCGAGTTCTGAACACCACCGACCCGATCTGAACACCCAATGTAACCCCACTAAACACACCATGTAACCCCACAAAACACACCATTATAACCATTACAAATAGCTGTAAGATTCGTAGGCGATAAGCTGGGTTGGAAAACGAAAACCGACCGTGCGATGCAGCAGGCATTGCAAGAAATACA
HD3A1003	I07	HD3100820	probe	FBgn0003480	spindle B	spn-B	201	AATTCGCTCGCAAGTCGT	CTGCTCGGCGATTTCTCT	AATTCGCTCGCAAGTCGTCGCATGGCTCGGCTGTTTGATCAATAATCCCCCGGAATACTTCCAATTCCGGAGGTGTTGAGACACCTTTCGTGTTTCGGGGAGCCATTATATCACGCAATCCCATCGAGGACATGCCATCGCATCGCGATGACAAACTTTCTGGATCAATTGCCCAAGCATATCAGAGAAATCGCCGAGCAG
HD3A1003	I08	HD3100916	probe	FBgn0004832	Xeroderma pigmentosum group A-like	Xpac	225	TCGGCAAAAAGAAGCATTTTA	CCTTGAATGGATGCGAAAC	TCGGCAAAAAGAAGCATTTTATAAACAAAATTTCTGAGAAGTTGCGCGCACAAAAAACTAAAACTTGTGAAATCGCCATGTCTGCGGAGGTCTCTACCAACGAATCTGCTCCGCCGGCGGAGAAGAAGTCCAAGCTGACCAATGCCCAAAAGGCGCGGATCGAAAGGAACCAGGCCAAGGCGCAGAAATTGCGGGAGGCCAAGTTGGTTTCGCATCCATTCAAGG
HD3A1003	I09	HD3100821	probe	FBgn0010282	Transcription factor IIFalpha	TfIIFalpha	203	TCCGGAGGAGGCTAAGCTA	TCTTTTTCTTTTTCTTGTCTGCG	TCCGGAGGAGGCTAAGCTAATTAAGGCAGCCACCAAAAAATCCAAGGAGCTCAAGATCACTGACATGGATGAATGGATTGATTCCGAGGATGAGTCGGATTCGGAGGACGAGGAGGATAAAAAGAAGAAGGAGCAGGAAGACAGCGACGATGGCAAGGCCAAGGGAAAGGGCAAGAAGGGCGCAGACAAGAAAAAGAAAAAGA
HD3A1003	I10	HD3100917	probe	FBgn0035424		CG11505	209	GTGGCATGCAAAAGAACCT	CGGTGCAGTGGTTACATAGG	GTGGCATGCAAAAGAACCTAGACAAGAGCTATAGCGGTGGTGTGGCCACCCATCATCACTACACCACCCAGGTGCAGGCTCTGCCCGCCCACAGCCATCATCTACAGGCTCAGCAGCAGCTGCAGGGACAGACCCAGCAGCAGCACTATCAATTGGCTTCCTCCAGCGCTGCAAGCGCTCCGCAAGTTACCTATGTAACCACTGCACCG
HD3A1003	I11	HD3100822	control_rh6	FBgn0019940	Rhodopsin 6	Rh6	167	CCTGCGGCACTGACTACTTT	TGAAAGGCCAAAATCAATCC	CCTGCGGCACTGACTACTTTGCCAAGGACTGGTGGAACAGGTCCTACATCATCGTCTACTCCCTGTGGGTCTATCTCACGCCGCTGCTGACCATCATCTTCTAATATGACATTCGTTACTAATTATCCAAGGATTCTGTTTGATTAAGGATTGATTTTGGCCTTTCA
HD3A1003	I12	HD3100918	control_rh6	FBgn0019940	Rhodopsin 6	Rh6	167	CCTGCGGCACTGACTACTTT	TGAAAGGCCAAAATCAATCC	CCTGCGGCACTGACTACTTTGCCAAGGACTGGTGGAACAGGTCCTACATCATCGTCTACTCCCTGTGGGTCTATCTCACGCCGCTGCTGACCATCATCTTCTAATATGACATTCGTTACTAATTATCCAAGGATTCTGTTTGATTAAGGATTGATTTTGGCCTTTCA
HD3A1003	I13	HD3100823	probe	FBgn0010825	Grunge	Gug	210	CCGCTAAGGTGGATGGATT	TTTGTCGTTTGTGTGCCATT	CCGCTAAGGTGGATGGATTCAATGGTAAACAAAAGTGTGAATTATACTAAACAAAATGAGAATCCACAAAGTAAAAATATTTTTAAATACGGTTTTTTATTTCACATTTTGAATATACACATTGATATAAATATATTGTAGCTATATACTAATTATGAAAGTTTATCGTAGGAGTCTCGCAAGCATATTCAATGGCACACAAACGACAAA
HD3A1003	I14	HD3100919	probe	FBgn0032600		CG17912	210	AGAAGGCCAAGCACTTCAAA	CACCATTCTTCTGACGTTCG	AGAAGGCCAAGCACTTCAAATGCCACATCTGCCACAAGAAGTTGTACACCGGACCCGGACTATCCATACACTGCATGCAGGTGCACAAGGAAACGGTGGACAAGGTCCCCAACTCGCTGCCCAATCGCTCAAATATTGAAGTCGAAATCTTTGGCATGGACGGCATTCCCGCCGAGGATCTCAGGGATCACGAACGTCAGAAGAATGGTG
HD3A1003	I15	HD3100824	probe	FBgn0086134	Proteasome alpha2 subunit	Prosalpha2	201	AAGATCTGGAGCTGGACGAC	TTAGCTTGTGGTAATCTTAGCGG	AAGATCTGGAGCTGGACGACGCTGTTCACACCGCCATCCTTACGCTGAAAGAAGGTTTTGAGGGAAAAATGACTGCCGACAACATTGAGATCGGAATCTGCGATCAGAACGGATTCCAGCGTCTGGACCCCGCCTCAATCAAGGACTACTTGGCCAGCATCCCCTAAACTTAAACGCCCCGCTAAGATTACCACAAGCTAA
HD3A1003	I16	HD3100920	probe	FBgn0027574		CG5815	206	GTGCACAGGAAGAAGCGAAT	TTCCAAATGTTCCTATGGCAG	GTGCACAGGAAGAAGCGAATTCTGATGAAGATTGGTTTGCTGAAAATAGCTTATTTTTATATCATATTTTAGTCGAATATCCATGGTTAATGCCACAATGATTATAGCGGGCTCATATTTGGTATATGTACAAGTACATATGTAAACAATATATAATTTTGTGTGCGGACGACTACATCGTGTAGCTGCCATAGGAACATTTGGAA
HD3A1003	I17	HD3100825	probe	FBgn0039858	Cyclin G	CycG	203	GCGTGCGAGTGTAGTAGTGC	GGCGCTACTCTCGGGTAACT	GCGTGCGAGTGTAGTAGTGCTGGTTGAGGTAGAGTGTGTATATTTTGCTAAAGTGCATCATAATTCTTTTGGCATACACACAAATGTGTATTTGGTAGCGCGCTGGTTCTAACATTTAAGAAACTATTGAGATACGGAAATGTGGGCGCCAAGGTGACGCAGCCACGCCCACCCCTTTTGAAAAGTTACCCGAGAGTAGCGCC
HD3A1003	I18	HD3100921	probe	FBgn0000524	deltex	dx	216	CAATAAAAATTTCTCGCCTGC	CGAAGATGGGCACAAAATAAA	CAATAAAAATTTCTCGCCTGCGCTTGCGCTAAATGCTAGAAAAACTGTTTTTACCATCAAACGTGAATTCTTAAGCTGCGCCTAAACGAAACCGAGTGACTAAAGAACCAGAACGAAAACTTCGGGAAAATGGAAGCCAGGGAAAATCAGGGATAACTAACGCTGGCAGCGGGTCCACCATTTTTAATTTCTTTGTTTATTTTGTGCCCATCTTCG
HD3A1003	I19	HD3100826	probe	FBgn0024732	DNA fragmentation factor-related protein 1	Drep-1	213	GTGCAGCTTGTGGAAGGAA	TGAAAGGCTTTTTGGAGTCG	GTGCAGCTTGTGGAAGGAAATTCCAAGTTTGTTTGTTCGGACGCCGAGTGCAAGTGCAAGAAGCAAGCGAAAAGTAATCAAATCTATAGAAAAGTCATTTAATGTGGAGCAATTAAGCCTGGAAATAAAGTGCATAGTGAATAAGTAATTTAGTTGGAGCAAACAAAGCCATGGAGACTGCAGCGAACTCGGGCGACTCCAAAAAGCCTTTCA
HD3A1003	I20	HD3100922	probe	FBgn0031657		CG3756	211	GAAGGCGGTCTTATTGATTCC	TGACGATTTTGATGTGCAGC	GAAGGCGGTCTTATTGATTCCAACACGTGCGGTTCAATTTTGTTAAATTATTTAATAAAAACACCGGGGCAAATGGCAAGCAAAAATCGCAAGGAGCCGCTTCTGTACATGGAGGAGTATCGGGTGAAGCAGGATCCGCAGGACTATGGACTGGCGGACGATGTATTTTCCGTTCAGGCTTTCAAGGAAAAGCTGCACATCAAAATCGTCA
HD3A1003	I21	HD3100827	probe	FBgn0038244		CG7987	201	TAGATGCTGCTCTGCTCAGG	GATCCGGAGAAGTTGGTTCA	TAGATGCTGCTCTGCTCAGGGAGAAGACTTATGAGAAGTTTAATCCGAGCATTGTTAATGATCTGGAGGAGATCCTCCGCTCTCCACTGAAGCACGAGAGAAATTCTCGTCTTCGCTTTACCAGCGAGTCATCCACCACGCCACAATATTTGCACGAAGAGGAGCAAAACCTTATAAAAATTGAACCAACTTCTCCGGATC
HD3A1003	I22	HD3100923	probe	FBgn0031779		CG9175	219	GTTAACAGCCGGAGTGTGC	GCTGGTTAGCATGTCCACG	GTTAACAGCCGGAGTGTGCCAGCGGTAGACCCAATTAGATGTGCCTGCCCCGCGGCCAGAGCTGATAAACTCGAGTCAATCACTCAGCCCCAATCCCTCCGCCCCCAGCGTCCGGTCGATTGTGATATATTATTGATAATGGCCCACACCCGCCGTCCCAGCGACGGCCTGCTGGCCCGCGTGAACTTCCCGCTGTACGCCGTGGACATGCTAACCAGC
HD3A1003	I23	HD3100828	probe	FBgn0035449		CG14971	224	GCTGGCTTTTCTCATGGAGT	GCTGCATCTCCTTCATATTGG	GCTGGCTTTTCTCATGGAGTTCAGCGAATTCTTGGTGCTCTGCAAGACCTCCAGTCTGACGCTCTCGATAGCCGGCATTTTCAAGGATATCTGCCAGTTGGCACTAGCCGTGACTATCAGAAAAGACCACCTGAGTGTCATCAACTACATTGGCTTGATCATTTGCCTGGCTGGTATCGTTTGCCACCTACTGCACAAGTACTCCAATATGAAGGAGATGCAGC
HD3A1003	I24	HD3100924	probe	FBgn0001086	fizzy	fzy	208	CGACCGGCAGAAACTCAT	ATCAGGTGCATCCAGAATCC	CGACCGGCAGAAACTCATCTCTGAAGTGGCCCAGGTCGGTGACTCCAAGGGCGGGCGCATTTTGTGCTACCAAAACAAGGCTCCCGCTGCTCCAGAAACACACAACAATCCCCTGAAGGTCGTGTACTCCATTAAGACACCCATATCCACAAAGAGTGGCTCACGCTATATACCCACCACATCCGAGAGGATTCTGGATGCACCTGAT
HD3A1003	J01	HD3101009	probe	FBgn0260648		Rrp40	216	ATCTGTACCGCGTGGACATC	AGAAGAATCCATCGGTGAGG	ATCTGTACCGCGTGGACATCGGAGCAACGGACACAGCCTCCATATCGTATCTCGCCTTTGAGGCGGCCAGCAAGAAGAATCGCCCGGATCTGATCCCCGGTGATCTGATTTACGCGAGAGTCCTGAATGCAAGCGCGGACATTGAACCGGAGCTGGTCTGCGTCAACTCGGTGGGCAAAAGTGGCAAACTGGGCGTCCTCACCGATGGATTCTTCT
HD3A1003	J02	HD3101105	empty
HD3A1003	J03	HD3101010	probe	FBgn0041171	archipelago	ago	208	AGCAGTCGCAAGTACACGAA	GAGCCAGACTGGGGTAATCA	AGCAGTCGCAAGTACACGAATAGCCGGCTAAGCAAGTCCACTGCCAAATTAAATCTGGGATCCTCGTTGGGCGCCTCCAGCTGCAGCCAGCACCGGAGTGGTTCCAGTTCCACTTCAAAATCCATGGAGTCATCGACCAGTTGCACTGGAGCTGCCCGAACGGACGTTTACACAAACACCAACTCGAATGATTACCCCAGTCTGGCTC
HD3A1003	J04	HD3101106	probe	FBgn0037018		CG4042	224	CTGCCTGGACTCCCTTAAGTT	CCGTGGACAATTCCAGTTCT	CTGCCTGGACTCCCTTAAGTTCCTGTCCTTTCACAATGTGAAAAGCTTTGATGACTGGTGTCTGGATAGGATTTCGGGAGGTGGCTTCCCTAACCTGGAAGTGCTCGACCTCTCGTGCACTCAAATCACCAGCAATGGATTGGCCTGTCTGTATCGTTTTCCTAAACTTAAATTACTGATTTTGAATGATCCAAAGGAGACCCTAGAACTGGAATTGTCCACGG
HD3A1003	J05	HD3101011	probe	FBgn0037363		Atg17	221	CGTCTCCTCCCCCTAAACTC	CGGCACTTGTCCTTGTTAAG	CGTCTCCTCCCCCTAAACTCTGAATCTGTGATGGCCAACGTGGGCATATTAAAGGACATGTTGGCCGACAAGGAACGGCAGCTAGATCAGCTGCGGGAGCAGAATAAGATTCTCACCCAAGAGACATACCAGCTGAAGACACGACTGGAGATGATCACCAACGAGGATGGCAACAGCTGGCTTAAGGAGAAGATCGACTATCTTAACAAGGACAAGTGCCG
HD3A1003	J06	HD3101107	probe	FBgn0035707		CG8368	207	GGCGAGCTACACACTCGTTT	GTCGGTGATCCGGTTATTTG	GGCGAGCTACACACTCGTTTCCAAAACTTTAAGTTTACCAAGGATCTGTATGCACCGGTAACCAATCGCAGTCCTATGTTCGGCGTTGATTGTGAAATGTGTCACACGGAGGCGGGTTGTAACGAGCTAACCCGAATCTCTATTGTCAACGAAAATTACGAGACCGTTTATGAAACGCTAGTGTTGCCAAATAACCGGATCACCGAC
HD3A1003	J07	HD3101012	probe	FBgn0000018	abnormal oocyte	abo	218	TGGAGAGAATGCATCTGGTG	CGATCGATCATTGCTCATGT	TGGAGAGAATGCATCTGGTGAACAATGAACTTCTAATGTTGCGCTATGAAGAGCGGCCAAATGGTACCGATACCATGCCCATGGCTACATCACCGCGCCGCTTGTATGTATTCTACACCATAACTGGCGAAGAAGTGGTTGGCGTTTATCCGGAATATTCCGTCAACCTGCTGCAAATCTTACTGCAATTCAATGACTACATGAGCAATGATCGATCG
HD3A1003	J08	HD3101108	probe	FBgn0034002		CG8079	202	GAGTCGCTGAAAGTGGGAAG	ACATTGGGGATCCATTGAGA	GAGTCGCTGAAAGTGGGAAGCCTGCATCTAATCACATACAAAGGTGGATCTCTTGGACGGGAGGGCGCTCACGATGTTATCATTCCGGACGTGAACGTCAGCAAGTGCCACTTAAAGTTTAAGTATGAGAACAAGTTGGGAATCTACCAATGTCTTGATCTGGGCTCCCGAAACGGTACCATTCTCAATGGATCCCCAATGT
HD3A1003	J09	HD3101013	probe	FBgn0024985		CG11448	204	AGTGGGTGAAGACCACGAAA	CACCCTGGTACGCTTTGAAT	AGTGGGTGAAGACCACGAAAAGAAGATGGAGAGAAATTGAGTATTTGGTGAATTAATGTTAACTAAATTTATATACACATATACACATGCATTATACATAATATACTTTACTATATACTATGTAATACCGTATTATATGGAACTATGACTAACCAAAAAGGCAACAAGGCAACAATTATACAAAATTCAAAGCGTACCAGGGTG
HD3A1003	J10	HD3101109	probe	FBgn0029157	slingshot	ssh	201	CCGCCTACAACACCATGTAA	TGGTGTTCGATTGTTGGACA	CCGCCTACAACACCATGTAAAGGCCATGCTCTGCTTAACAACATGCTAACTGCAAACTGCAACATTCACATACCACTTGCAACTTGCAATCCATACCCTGTAGCCACTAAGGATCGTCCTCATCCTATCGCCTGCTTTACTTATTTATATACTCGCCCGCTTTCGACCATTTTGTGTTTTTTGTCCAACAATCGAACACCA
HD3A1003	J11	HD3101014	control_rh6	FBgn0019940	Rhodopsin 6	Rh6	167	CCTGCGGCACTGACTACTTT	TGAAAGGCCAAAATCAATCC	CCTGCGGCACTGACTACTTTGCCAAGGACTGGTGGAACAGGTCCTACATCATCGTCTACTCCCTGTGGGTCTATCTCACGCCGCTGCTGACCATCATCTTCTAATATGACATTCGTTACTAATTATCCAAGGATTCTGTTTGATTAAGGATTGATTTTGGCCTTTCA
HD3A1003	J12	HD3101110	control_rh6	FBgn0019940	Rhodopsin 6	Rh6	167	CCTGCGGCACTGACTACTTT	TGAAAGGCCAAAATCAATCC	CCTGCGGCACTGACTACTTTGCCAAGGACTGGTGGAACAGGTCCTACATCATCGTCTACTCCCTGTGGGTCTATCTCACGCCGCTGCTGACCATCATCTTCTAATATGACATTCGTTACTAATTATCCAAGGATTCTGTTTGATTAAGGATTGATTTTGGCCTTTCA
HD3A1003	J13	HD3101015	probe	FBgn0032679	bicoid stability factor	bsf	204	ACTCCGCATTAGTGACCCAC	CCTGCTCAACTTCCTCATCC	ACTCCGCATTAGTGACCCACCAGATTGCCGAAGCAGCCAAGATTATGGAGAAGAACAGAGCTTACTACGTGCCCTTCTTGTTCAAACAACCTTTGATTCTGGCCCTCAGCCATACGAACGATTATGCCTCCTTCATCCGATGTGTCCGCCAAATTCACGAAGGATTGCAATTCAGGCAAGGCAAGGATGAGGAAGTTGAGCAGG
HD3A1003	J14	HD3101111	probe	FBgn0034933		CG3735	206	CTCCAGTGTGGAGACGACCT	CCCGGGAAATCTTTTCTTTC	CTCCAGTGTGGAGACGACCTTCGACGATCGGTTCCAGTACTTCGTCAAGAATATTATGCCCCAATTCAGTAAGCCCGGTTTCTCGCACTGTATGCTATACGTGCCCAGCTACTTTGACTACGTACGGATACGCAACCATTTCAAGACCGAAATGGTCAGTTTTGTGCAGATAAATGAGTACACCAAGAAAGAAAAGATTTCCCGGG
HD3A1003	J15	HD3101016	probe	FBgn0037911		CG10898	221	GACGGAGACGGAGACACATT	CCAATAAAATGGCCAAGACG	GACGGAGACGGAGACACATTCCGATGCACTTTCTCCTGAAGAAAACCCGTCGAGCGGCTTATTTGACATCCATTTCGATATCAATACAGAGAAATAGAGAGAAATAGCAAGAAATAGAGGCCACAGCACCACCAGCCAGCCACCTGTGTAGCGACAACAAGCGACGAGCTGCAAAAACAACAACAAAAAGTTGATTGCCATCGTCTTGGCCATTTTATTGG
HD3A1003	J16	HD3101112	probe	FBgn0002899	mutagen-sensitive 301	mus301	221	ACGCCGACAAGCTGTTTAAG	GCCCTCAATCACAGATTTGG	ACGCCGACAAGCTGTTTAAGAAAATCAACCTCAACGATCTGAGCATTGCCGAAATGGAGGATATTTTCCATGGCGCCGATGATTTTAGTGATCCCATGGTTCAAAACACACAACTCTTCTTGGACGCAATGACCTTTAAGAAGCCCAAAACACCAGAGAAGCTACTGGCCCCCCTTAAAGACGATTCCATGTCTTTCATTTCCAAATCTGTGATTGAGGGC
HD3A1003	J17	HD3101017	probe	FBgn0027524		CG3909	201	TGCCAGTAGTTCTCTGGACTC	GCATCCAATGTCTGCTCTGC	TGCCAGTAGTTCTCTGGACTCCACCATGTGTTTGTGGGATGCCCGTTCGGGCGACAAGAAACACCTACTTAGCTTTGGGCCTGTTGATCTCTGGACGGTGCAATTTTCACCCTGCAACAAATATGTGATATCCGGACTGAACGACGGCAAAATCTCCATGTACAGTGTGGAAACCGGAAAGGCAGAGCAGACATTGGATGC
HD3A1003	J18	HD3101113	probe	FBgn0022699	D19B	D19B	219	CACACGCGAGTACACACAAA	ACTCGGAACAGATCGTAGGC	CACACGCGAGTACACACAAATGTGTGTTGTATTGGATTTTTTTCTCGGCGAAAGAACATTTCGAATTGCTGTGGTTTTCGCGATTTCTGGCTTTCGGGATCGTCCAGCATCGAATTGAGTGTCCAAAATGAATGAGGAGAGCCAGTACTCCATACACACGGTGTGCCGCACCTGCCTGTCCACGGTGGACGACTCGGCGGCCTACGATCTGTTCCGAGT
HD3A1003	J19	HD3101018	probe	FBgn0034181		CG8963	210	CATCACGCTTCCTGACCATT	CCTCCTGGTGGTAGTCAAGC	CATCACGCTTCCTGACCATTTTCGATGGCATGGAGAACAACCAATTCGTGCTCTCCATCGCCATGGAGGACATCTTCGAGAAGTCGATCGAGCAGCCGAACTTCCGGTACATGGGCGCCAAGCTGTACAACCTGCTGCACATGCTCAACTCGAAGCCGGACTCGCTGTTCCACACGCTGCTCAAGTGCAAGCTTGACTACCACCAGGAGG
HD3A1003	J20	HD3101114	probe	FBgn0265523	Smrter	Smr	219	CAGGCGTTGGAGGATAAAAA	AATGGCTCCAAAGTTTTTCG	CAGGCGTTGGAGGATAAAAAGATGCGATCCTATGCGGTTATACCGCCTCTGATGCACGATGCCCGCCAGAGGCGATGCGCCTATCATAATGAAAATGGACTTATCGAGGATATGGTGGCAGTTCATCAACAGCGTAAGGCCCTCAACATGTGGACCGCCGGCGAGAAGGAGACCTTTAAGGAGAAGTATTTGCAGCATCCGAAAAACTTTGGAGCCATT
HD3A1003	J21	HD3101019	probe	FBgn0030530	Ajuba LIM protein	jub	205	GGTGGAGCAGATACAGCACA	CAGATAGCCGTTCAATATGGC	GGTGGAGCAGATACAGCACACGCACAACGGAAGTGCACAAATCTATGCACCGACCGCACAGATTCTGGGCCAGCGGATTGCACCGCAGAAGCATTCGCCGGTATATGAGAACTTGGAGTTCTACGGTCAATTCGATTCAAACCACAAGAGGGCTCAGCCTCAAAGTCCCGGGAGCAGGCAGAGCGCCATATTGAACGGCTATCTG
HD3A1003	J22	HD3101115	probe	FBgn0051224		CG31224	201	AGTGCACCAATATGCACGAA	GCCATCGCTGCGTTTATCT	AGTGCACCAATATGCACGAATTGTACACCAAATTGTAGATGAAAGTGGCGTTTATTCGTTTTCTATGCGGCAATAGACAAAAAACGGCTCGAAGTGCATGAAAAACGTGCTTGAAAATATTACTTTGTGTGTAGCCACACGCACTCCAACACACACAAACGCACACACACACAGACAGAGGGAGATAAACGCAGCGATGGC
HD3A1003	J23	HD3101020	probe	FBgn0086758	Chronologically inappropriate morphogenesis	chinmo	203	AATTAAATGCAATCCGGCTG	ACTCCCTCAACACACACGAA	AATTAAATGCAATCCGGCTGAAAAATCGTTTTCAGGGTGCTAATCAAACAATGAAAAACAAGTGAAACTTACGAAACTAACGAAATAGTAATGCAAAAAGTTTGAACGTTTTTGATTGGTACCGCCCAAAAAGAGAGAGAGTAGCCAGCATATAGCAAAAACAAAACGTTGAGAATTTGTTTATTCGTGTGTGTTGAGGGAGT
HD3A1003	J24	HD3101116	probe	FBgn0013733	short stop	shot	216	AATTCTAGCCAGGAGTGGCA	TGTGTGTGTGTGTTTGTCGC	AATTCTAGCCAGGAGTGGCACGTGGCAGAGGCGGAACGGCCAAAAAAATAATAACTAAACCCGTTAAAGAGATAAAATTTGATTTTGTTCTGTTATTAAACTAATAGGAAAGTGAAAATTGTAAGCCGCATAAAGAAAATATTTAATTATATACTAAAAGTCATTACTATAAGTTTAATTAATATTTAACTGTTAAGCGACAAACACACACACACA
HD3A1003	K01	HD3100829	probe	FBgn0033273	GASZ ortholog	Gasz	206	CCCCTCTCAGAATCCCTTGT	AAGGAAAACCACGTTCTTCG	CCCCTCTCAGAATCCCTTGTTCATTGACTTCAACGAAATACTCGCAGAGCGAAAACGCAAAAAGGTGCGCAGCTACTTCAAGTACACCACCATTATACTTGGAATCTCAGTTTTCATTTGCCTCAAGTGCAAGTGGTTCTCATAGTATCCGCTCAAGAACATTCCTCATATTATTTCCAACGTTTACGAAGAACGTGGTTTTCCTT
HD3A1003	K02	HD3100925	empty
HD3A1003	K03	HD3100830	probe	FBgn0023211	Elongin C	Elongin-C	222	CCCACGTCCTACAAAAGGTC	GGCAAATTAAGCTTTACGCA	CCCACGTCCTACAAAAGGTCTGCATGTACTTCACCTATAAAGTGCGTTACACCAACAGTTCTACCGAAATACCCGAATTCCCGATCGCTCCGGAGATCGCATTAGAACTTTTGATGGCGGCTAATTTCCTAGACTGCTAAAGAAAATAATATTGGTTAATTTGAATTTACATTATTTACAAGTGAACGAAGAAGGGCCAGACTGCGTAAAGCTTAATTTGCC
HD3A1003	K04	HD3100926	probe	FBgn0027503		CG11970	209	GCCAATTGGAGGAACGATTA	AAACCAATATGGGCGTGGTA	GCCAATTGGAGGAACGATTATATCAGCCTCATCGAATATAAATGCAAATCAAATCCCCATGCAGCAGATACAGAAATCTCTGTTAAAGCCTGTGGTAGTGCCCAATTCCGCTCCATCCCCCGTACAACGGCAATTGGCAACTGGTAAATCTGGCACCTTTGCGATCTCCAAGATCAGTCCCACGAGAAATACCACGCCCATATTGGTTT
HD3A1003	K05	HD3100831	probe	FBgn0020887	Su(z)12	Su(z)12	203	GTACGAGAAGTCCAGCGGAT	GCTCATTGGATAGCGTCAGA	GTACGAGAAGTCCAGCGGATTCATAACCGAAGGCGAGTACGAGGCCATGCTGCAGCCTCTTAATTCCACCAGCATCAAGTCCTTCTCACCAAAGAAATGCACATGGGAAACGATGCCGGATAGCTACATTCCACTCTCGTTGACCTACGACGTCTACCAGCAGAGTCCCATGCTCAAGTTCCATCTGACGCTATCCAATGAGC
HD3A1003	K06	HD3100927	probe	FBgn0032250	hole-in-one	holn1	204	GGAGTCTATGTGCGAAAGTGC	TTTAAGTCCAAACCAAGTGCAA	GGAGTCTATGTGCGAAAGTGCGGCGAAAACACAAATTTCTATACAAGCAACCGCATAGATTTCGATTTGTACTTGTAGGCCTTAGTTAACAAATGTTAAATTCTTTGGGTTTTAACATGTTTTCTGCAAATACTTTGTTCTATAATTGTATACTGTATACTTTACAAGAGGTTTCAATTAGTTTGCACTTGGTTTGGACTTAAA
HD3A1003	K07	HD3100832	probe	FBgn0016977	split ends	spen	202	GCTATGAGTCAAGCGCCTCT	ATCGCACTGCAGGCATTAGT	GCTATGAGTCAAGCGCCTCTTCTTTGCAATCTCGATCTCGTGCATCTTCCTTTAGCCGCCATCAAAACAACTCTAACGATGACTGCTCTCCCATTAACACGCCAGGAGGAGCAAGCAGTGGAATCTCCAGCGCGAGCAATTTAATTAACCAAAGCACCAGCATCAACATTTCAAACATTGGTACTAATGCCTGCAGTGCGAT
HD3A1003	K08	HD3100928	probe	FBgn0029174	FK506-binding protein FKBP59	FKBP59	202	GGCTGAGGCCAAGGTGTA	GGCTTCGAAGTGATCGTTG	GGCTGAGGCCAAGGTGTACAAGGAGAAGGGCACCAACTACTTTAAGAAGGAGAACTGGGCTCTAGCCATTAAGATGTACACCAAGTGCAAGAACATTTTGCCCACCACTGTCCATACCAATGAGGAGGTGAAGAAGATTAAGGTGGCCACGCACAGCAACATTGCTCTGTGCCACCAAAAGTCCAACGATCACTTCGAAGCC
HD3A1003	K09	HD3100833	probe	FBgn0264848	vihar	vih	201	ATCTGAAAAAGCAACAGACGC	TGATATTCTGCGCCATGACT	ATCTGAAAAAGCAACAGACGCGTATTCCGACCGATCAAACTAAATTTCCACTATACAGTACATATAATCACAATTGAGAATCGAAAACCCGACCGCCACGAAGCGCGCTAAATTACACGCACATACTGAAAGCCAAACAGCGGATAGCACTAGCATCCTACATATATAGACGTAGATATATAGTCATGGCGCAGAATATCA
HD3A1003	K10	HD3100929	probe	FBgn0038183		CG9286	201	ACCAACGCTGAGGATGAGTT	TTCGCCATTAATAAAGCGTTG	ACCAACGCTGAGGATGAGTTGCTTTCGGATCGGGCTAAGTTCTCCTTCGAGTATTCCATGGCCTCTGAAACCGATTCGGGCATGTCTGGCGATTGGCTGGAAGGCGATGCCGTGATGACGCCCTACAGGAAACTCCTGGTCCTGGAGGCCAAAAAACTTCCGCAGCTTATTGACGATATACAACGCTTTATTAATGGCGAA
HD3A1003	K11	HD3100834	probe	FBgn0033015	d4	d4	210	CATGGGAGCATCAGGAGATAA	TCTACGTTTGCATTTGTTCGTC	CATGGGAGCATCAGGAGATAATGATAGTAAGGACTCACATGCAAACGTCGAAAAAGAATGGTTCCACGATGAAATGGACACATCACATTTTCATCATGGCGATGAATTTGAGGATGACTTTGATTCAGATAACGATTTTGATGAGTCTTACACCAGCCGGGGCAAACGCAAAAAGTGTTCGCGTCCTAGACGAACAAATGCAAACGTAGA
HD3A1003	K12	HD3100930	probe	FBgn0040290	RecQ4	RecQ4	213	GGAACCACAAGAATATCGGC	TTGCGCTTTGCCTTATCTTT	GGAACCACAAGAATATCGGCAACTATCAAAACGTCGCAAAATTGTTTCAACAGCATCAGGAAAAGTGGAAGTAGCCGCCCCAGTTGAAATTCCCAACAAAGTCGAACCAGAGACAGAAACATTTGCTCAAGAGAATCCAGATTTCTCTGCAGATGAAGACCAGGATGCTACATATGTACCAGAGAATAAAAAGAAAGATAAGGCAAAGCGCAA
HD3A1003	K13	HD3100835	probe	FBgn0003360	stress-sensitive B	sesB	201	AAAATGGGCAAGGATTTCG	CTCCTTTGGAATGCGGATAA	AAAATGGGCAAGGATTTCGATGCTGTTGGATTCGTCAAGGATTTCGCTGCCGGAGGCATCTCCGCAGCTGTCTCCAAGACTGCCGTCGCCCCCATTGAGCGTGTGAAACTGCTCCTGCAGGTTCAGCACATCTCGAAACAAATCAGCCCCGACAAGCAGTACAAGGGCATGGTTGATTGCTTTATCCGCATTCCAAAGGAG
HD3A1003	K14	HD3100931	probe	FBgn0023509	Myb-interacting protein 130	mip130	223	CATCCCCGACTACGAGATTG	GTAGAGTGATCCCGCTCCAG	CATCCCCGACTACGAGATTGTGTCGGAGAACTTTCACGAGATGCTGCCTCTGCACAGCTTCACGAAGGATTTCCGGCCGAACTTGATGAGCATCTATCAAACGAATAACCTCGGCTTCACCACCAATCTGGGCTTCACGGCAAATCTTACCAACAACTATCTGCAGAAGAAGGAAAAAATAGACGGCGGTGCAGGAGCGGCAGCTGGAGCGGGATCACTCTAC
HD3A1003	K15	HD3100836	probe	FBgn0020620	Related to the N terminus of tre oncogene	RN-tre	216	TAGTTTGAGTCTGCGCGTGT	AGCTTCTTCATCACGCGTTC	TAGTTTGAGTCTGCGCGTGTGGGATATATTCATGTTAGACGGCGATCGCGTCATACTGTCCATGGCCATCACCATTCTGTACCTTCACAAAGACGAACTATTGCGCCTGAAGGACATGGACGCCATCATTGAGTACTTGCAAGTACGGCTGCACAAGAACTTTGGCTACAGCGACGATGATGCCATTCAGGCTCTGGAACGCGTGATGAAGAAGCT
HD3A1003	K16	HD3100932	probe	FBgn0033571	Rpb5	Rpb5	214	AAGCGGCATACACTGGTCTT	GCCGAACATTTCCTTGAACT	AAGCGGCATACACTGGTCTTACTACATTATCCGCGTGCTCTGTTTATAATTTAGAAATTGTTAATTTTTGGAAATAGCCATGGATGACGAAGCGGAAACCTACAAGCTGTGGCGCATTCGCAAGACCATCATGCAGCTGAGCCACGATCGGGGCTACCTGGTGACCCAAGACGAGTTGGACCAGACCTTGGAGCAGTTCAAGGAAATGTTCGGC
HD3A1003	K17	HD3100837	probe	FBgn0034802		CG3800	205	GAAGAATCAGGCGGCTAGAA	GTCTTGGCTGATGGGTGTGT	GAAGAATCAGGCGGCTAGAAGATCAGGCCACGTTACCACTCGACTCCACTCAACTCCACTCCATCCAGCTGCTGCCGGCGAGCCTTGGGAATTATCCAGGATCTAAGACTGTAAGACAGGATCTGTAGACAGTAACCAGTATCCCACCCCTATACCATTAACTCCATCCACATCCATACCATACCACACACCCATCAGCCAAGAC
HD3A1003	K18	HD3100933	probe	FBgn0025186	ariadne 2	ari-2	225	AGTAGGCCCAACGACGTGTA	GGTATCGGTATCGCTAGGGC	AGTAGGCCCAACGACGTGTAGCTAATTTTTAAATTAAACTAATAATCAAGTGCATATAGACTAGAAAACGTAGCATAGAGCATAGTCGACTACTCGAAGTATAATTACTATAGTTGTGACATTCGAAATCACTCAAAATGATCGGTGTAACTGCAATACAACGCCTTGCGCAGAACGTTAACGATATACAGTATCTATAGCTAAAGCCCTAGCGATACCGATACC
HD3A1003	K19	HD3100838	probe	FBgn0038767	trade embargo	trem	209	GAAGGCCTACAAATTGCGTT	ATGGAAGAACTTAAACAACGGC	GAAGGCCTACAAATTGCGTTTGCATCGGGAAACGCATAATAGACGTATCACCTGGAGAAATGACGCAGAAGAGAGCACCAAAGCAGAAGATGTCAAGGGGGAAACGCCGGAGTTTCTCAATGAACTCCCCAAAGAGTGACATGTTCTTTTTAGTTCTTATGCAAAGTTTAGTCTAAGTATTTAGTAAGCCGTTGTTTAAGTTCTTCCAT
HD3A1003	K20	HD3100934	probe	FBgn0037236		Skp2	212	CCCGCATTTGCACCATATAC	GCCATAGTCAGATTGACCGC	CCCGCATTTGCACCATATACAGAAGTGTTTAGGACCCGATTACAATATCTTGACCTGAGTATGGCTTCCATCACCCGAAGCTCACTGCTGACACTATTGTCCCACTGCCGCCAGCTAAAGAAAATAAGCTTAGAGAATATTGAGCTCGATGATGACATCTGTGCAGAGATCGCAAAGAATGAAGCTTTGGAGGCGGTCAATCTGACTATGGC
HD3A1003	K21	HD3100839	probe	FBgn0003862	trithorax	trx	225	CGGTCGTTTTGCTTTGCTAT	TTTACGACGATGAAAAATGCC	CGGTCGTTTTGCTTTGCTATTTCCATTTCGCTCGTCGAAAAAACGCAGAAAATGTGGAAAATAATTGATAAACTGTGCTAAATAGTGTGTGTGAATATGGTATGCAGTGTCTGCCAATGAAATTACATCGAATTTGTGGCGTTCAATTGTTAAAAAAGTGTGAAAATCGAGAGCAGAAAACCTGATTTCTGTGAAGAAGAAGCAGGCATTTTTCATCGTCGTAAA
HD3A1003	K22	HD3100935	probe	FBgn0004643	mitotic 15	mit(1)15	208	CCCGAACTACAAGCAGGTCT	CTCACACAGCGTGGATGTCT	CCCGAACTACAAGCAGGTCTTGGAGAACCTCAGGCTGCTGCTGCACACGCTGGCCGGGATCAACTGCAGTGTGTCCAGGGACCAACATGTTTTTGGCATTATTGGCGATCATGTGAAGGATAAAATGCTGAAATTACTGGTGGACGAGTGCCTGATACCAGCTGTGCCCGAAAGCACGGAGGAGTATCAGACATCCACGCTGTGTGAG
HD3A1003	K23	HD3100840	probe	FBgn0016917	Signal-transducer and activator of transcription protein at 92E	Stat92E	215	GAGCTGTACGAGGTGCAACA	TCGTGCAGCGATTCGTAGTA	GAGCTGTACGAGGTGCAACATCAGATCATGCAGTCCCTCAATGAGTTTGGCAACTGTGCCAATGCCTTGAAGCTGCTTGCCCAAAACTACAGTTACATGCTAAACTCCACATCCTCGCCGAACGCAGAAGCTGCCTACAGAAGTCTTATCGATGAAAAGGCGGCCATCGTACTCACAATGCGTCGCAGCTTTATGTACTACGAATCGCTGCACGA
HD3A1003	K24	HD3100936	probe	FBgn0039044	p53	p53	205	TCCTTGTTCGTAAGGCGTTT	TGTTTGCAAAATATGACAACTCTTT	TCCTTGTTCGTAAGGCGTTTAACGGTGATATTCCCCTTTTGGCATGTTCGATGGCCGAAAAGAAAACATTTTTATATTTTTGATAGTATACTGTTGTTAACTGCAGTTCTATGTGACTACGTAACTTTTGTCTACCACAACAAACATACTCTGTACAAAAAAGCCAAAAGTGAATTTATTAAAGAGTTGTCATATTTTGCAAACA
HD3A1003	L01	HD3101021	probe	FBgn0025874	Meiotic central spindle	Meics	217	AGCTCCTCCAGCTCGATAAA	TGCAATGGTTCACTCTCCTG	AGCTCCTCCAGCTCGATAAATCAAACTCAAATCTGAGTAGATCCCATTGCAGAAGAGGTACTATGAACCCATTAATACCCTTCGAGATAGTTGGTTGCGAGGATCCATTGGACACAAATGTAACCAAATTGGACGCTAATCGGCCTGATGTAAAAACTGATATCGATGAGCCAACCGATGGAAAGGCAACTAATGGTCAGGAGAGTGAACCATTGCA
HD3A1003	L02	HD3101117	empty
HD3A1003	L03	HD3101022	probe	FBgn0045852	hamlet	ham	202	CGTCTTTCTTTCCCGGATTT	TGCGATTCACTGTTCTCACC	CGTCTTTCTTTCCCGGATTTCCGCCTTACGGATTTCCCCCCTTTCTACCACAAAATCCGCTGCATCCTACGAACATTCCGATGTTTTTCTCGAAAAATCCCATGGATTTGGGTTGCGGTGGTCCGGAGATCACTTCTCCCGTTTCCGCCTTTGATCAGAAACTACCATTTGGCTTTCTAAAGGGTGAGAACAGTGAATCGCA
HD3A1003	L04	HD3101118	probe	FBgn0011710	Septin 1	Sep1	207	CCAACCATCAGCGAACTCAT	GCTCGCTTTGAGACAACACA	CCAACCATCAGCGAACTCATATCACTTCTATCAAGCGAAACCACACACGAAAACAATTGTATTCCTATTATGTATTTAGACGCGATTAACAATGAATTATTATTGTAATACGCATCTAGGCTAAGCGAATCCAATCCGATTTATATTGTATGTTAATTCATTTTTGTCTGTTTACCTTACCCTTATCTGTGTTGTCTCAAAGCGAGC
HD3A1003	L05	HD3101023	probe	FBgn0039117	twister	tst	201	TTCAGAGACGTGGACGATCA	GAGAATGGCCTGCTTTTGAA	TTCAGAGACGTGGACGATCACATTATGAAGGCTGACCTAAAGCCTGTGCTAAACATTTCCACCACAACCAAGAACTTCAAGAGCGATTGGGCCGAAATGGTGGACATAAGCCAACCCATCAATAACTTTAAAGAGCAGATACCATGCCCCGCCATGGATTTCCCCTTCGAACTGGATGTCTTTCAAAAGCAGGCCATTCTC
HD3A1003	L06	HD3101119	probe	FBgn0039274		CG11920	207	GACACATGAGCGAGCAGAAG	CTTCGGTAAGCTCCAACTCC	GACACATGAGCGAGCAGAAGCCACACTTAATTTTTAATAACTTTAAAACGCCCATTGGCCTGAGAACTGTTAAGATACTCAAACACTTGTTCCCAGTGCCCAAGGAGAACTCCCAAAGAGTTATGTCTTTCCTAAACCACAATGACTCGATTATATTCAGACATCATCAGTACAAATATGTGAACAAGGAGTTGGAGCTTACCGAAG
HD3A1003	L07	HD3101024	probe	FBgn0002707	meiotic 9	mei-9	212	TCTCTGAATTCGGGCAGATT	GACCAAATGAGTCGCAGCTT	TCTCTGAATTCGGGCAGATTGTACAACCAATGCGTGCAAATGCAGCGGCATTATGCAAAGCCCATCCTTTTGATTGAGTTCGATCAGAATAAGCCCTTTCACCTGCAGGGCAAATTTATGTTATCGCAGCAGACCAGCATGGCCAATGCAGATATTGTGCAGAAACTGCAACTTCTTACGTTACATTTTCCCAAGCTGCGACTCATTTGGTC
HD3A1003	L08	HD3101120	probe	FBgn0040534		CG11985	222	GCAAAATGGGTGAACGCTAC	GCATTCGCTCCATCAGATTA	GCAAAATGGGTGAACGCTACAATATCCACAGCCAGCTGGAGCATCTACAAAGCAAGTACATCGGAACAGGACACGCGGATACCACAAAGTTCGAGTGGCTAACAAATCAACATCGCGACTCCTTGGCCAGCTACATGGGTCACTACGATATTCTCAACTACTTTGCCATAGCGGAAAATGAATCGAAGGCACGAGTGCGATTTAATCTGATGGAGCGAATGC
HD3A1003	L09	HD3101025	probe	FBgn0022772	Origin recognition complex subunit 1	Orc1	213	GCGCTCGAAGAAAACAGTTC	TGTTGCATGCTGGGACTAAG	GCGCTCGAAGAAAACAGTTCAAGACAATGACGAGGACTATTCGCCAAAGAAATCGGTCCAAAAGACGCCAACACGAACGCGTCGGTCAAGCACCACCACCAAAACAGCGACGACACCCAGCAAAGGGATCACAACCGCAACTGCAACCCCGATGACGCCCTCCCAAAAGATGAAGAAGATACGAGCCGGTGAACTTAGTCCCAGCATGCAACA
HD3A1003	L10	HD3101121	probe	FBgn0040268	Topoisomerase 3alpha	Top3alpha	217	GTCACCGTTAAGCCCAAACA	GACCCGTTTGCATCTCAACT	GTCACCGTTAAGCCCAAACACAAATGGCGCCCAACTCCGCTGGATACCGTGGAAATGGAGAAGCTTGGCTCGAGGAAACTCAAGCTATCTGCCAAGGAGACGATGACAATAGCCGAAAAATTATATACCAAGGGTTTCATCAGCTATCCCCGTACGGAAACCAACCAGTTCTCCAAGGAGTTCGCTCTGGCACCACTAGTTGAGATGCAAACGGGTC
HD3A1003	L11	HD3101026	probe	FBgn0039337	Mediator complex subunit 28	MED28	222	CCCGAAATTGTGTTGCTGAT	CCAGATCGATTTCCTCCTTG	CCCGAAATTGTGTTGCTGATTTTTTTGTTGTTTCCGCTGAACCGGCGAAGTTATTTGTATTTAATTGTTTATTCGACTTCCAAGCTCACGAAATCATGGCCAGCAATGAGTCCGGCGGCGGTAACCTGATGGACGAGTTCGAGGAGGCCTTCCAGTCGTGCCTGCTGACGCTGACCAAACAGGAGCCGAATTCCGGGACAAACAAGGAGGAAATCGATCTGG
HD3A1003	L12	HD3101122	probe	FBgn0031287		CG4291	213	GACTGGCAGCTACCCAAAAC	CACATGGAGTACTTCTTAATCCTCG	GACTGGCAGCTACCCAAAACGGATTACTACAGTGCTGCGCCCGTGGTTTCCGCCTCGAGTGAACCAGAACCTCCAGTCAAGAAGTTCAAGGAAAAGACGATTGGCGGTCTGGATGAGGAGATAGCCGCCACTGCGCCCGCCACGTTCAAGCGGAAATTCATCAGGAAGGGAAACAGCCGCCAGCGCGCCGAGGATTAAGAAGTACTCCATGTG
HD3A1003	L13	HD3101027	probe	FBgn0011481	Sequence-specific single-stranded DNA-binding protein	Ssdp	207	CGACGACGAAGAAGCTGAAG	GCTGTTGTTGCTATTGGTGC	CGACGACGAAGAAGCTGAAGCTGAAACAACCGAAGAGGAGGCAGCAAGACAGCAAGAGCCTCGAAAAGTACATAAAAAAAGTATAAAAATTTAAATACGCTCGAAGTCGGTAGACAAAAAGCGAACTAGCGACGAAAGAGAGGCGAGAAAACCCAAACTCCGAAATCTTAAAACCACCTTACCCAGCGCACCAATAGCAACAACAGC
HD3A1003	L14	HD3101123	probe	FBgn0033549	Methyl methanesulfonate sensitivity 4 ortholog (S. cerevisiae)	mms4	205	GTGGCCGAGTCCATAATAGC	GAGTATTGGGATCCTTGGCA	GTGGCCGAGTCCATAATAGCGCAGTATCCCTGTCCCAAGAAACTGATCGATCATTTCTCCAGCGATCCACTGGCTGTCCAAAGTCTCGCCGATTTGAAGATCAAGCGATGCAATGGACCACAGCCTCTTCACACCGAGCGACGTATTGGAAATGTTCTCAGCAACAAACTGTATACATTGTATACTGCCAAGGATCCCAATACTC
HD3A1003	L15	HD3101028	probe	FBgn0028926	Negative Cofactor 2beta	NC2beta	221	GGCCAGCATCAACAAGATCA	CCTCCGCCTCTTGTTTGTAG	GGCCAGCATCAACAAGATCATCAAGGAGCTGGTGCCCACGGTGCGGGTGGCCAACGAGAGTCGCGAGCTGATACTCAACTGCTGCTCAGAGTTCATTCATCTGATCAGTTCGGAGGCCAACGAGGTGTGCAACATGCGCAACAAGAAGACGATAAACGCAGAGCACGTCCTGGAGGCGTTGGAACGCTTGGGTTTTCACGACTACAAACAAGAGGCGGAGG
HD3A1003	L16	HD3101124	probe	FBgn0263749		CG43674	210	CTGAGCTGGGCCGAAAAA	AAAAGATTGTTGCGGTGTTTG	CTGAGCTGGGCCGAAAAAAAAACAGTCTTGAAGAAAACACCTTTCATCGATCAACGTTGAAATAGTTTGTTATTCCAAATACAATTTGAAAATTGTTTGTATTTAGCTAAAAATCCAACAAACAACACACGGCCACATTTGCAACGACAACAAGCACACAACAAACAACAAACCTTTGTTTCATGTTATCAAACACCGCAACAATCTTTT
HD3A1003	L17	HD3101029	probe	FBgn0024330	Mediator complex subunit 6	MED6	220	GTCAGTCGACCAAGCGAAA	AACTGTCGCTGGCAGTTTTT	GTCAGTCGACCAAGCGAAAATAACAAACAAATCGGTTTTTTAGCGAGCGCAAGGCAAATCACGAGTAGAAAACACAATAAAAGCTCGCTACAAAGGACAGTTAATCAGCAAAACACTTACAGTATTAACGTGAAGGTGGAGCAGCGAGAGCAGCGTGCACCACGGCCTGCTAAATTAATTATTACACAACAAATAAATCAAAAAACTGCCAGCGACAGTT
HD3A1003	L18	HD3101125	probe	FBgn0001219	Heat shock protein cognate 4	Hsc70-4	86	TACAAACGGGTCAAACGACA	AGCAGTGTGTTTGGTTTTGTTC	TACAAACGGGTCAAACGACAACTGCTCCCCGTAGTTCATTTATATAAATTATAAATTCATACTAGAACAAAACCAAACACACTGCT
HD3A1003	L19	HD3101030	probe	FBgn0061515	endosulfine	endos	209	AGTTCTCCGTTCCCCACTTC	GGCCTGAGAGATGGACTGAT	AGTTCTCCGTTCCCCACTTCAAATGCTCTATACCTAATTTTAATGAAAAACCTAATGCTAAGATGGCTGCTGCCGGATTGTGCGGGCATTTCGCGACAGTTTAAACTGAAATTCTAGCACCATGTTCCGTGTTTCCCCCGTTAAATTCAATCGCCATCCGCACTGGCCAATCAATCTCAAGATCAACTCATCAGTCCATCTCTCAGGCC
HD3A1003	L20	HD3101126	probe	FBgn0027602		CG8611	206	ATGTGGACAAGCCCAAAGTC	CGTTGGGCTAACATTGAACA	ATGTGGACAAGCCCAAAGTCAAGGCAATCGTTGTGCGAAGAAGGGCGCCTCCTTCGAAAGTTGAACCTACAAATTCATCAGTTCCCAATACCACGAAATCGCCGACGCCTTCAGTTTCCTCCAGCAAATCCGCAATTTCCACTCTTTCAGCATCCCCCAAAGCAAATGCATCCAACGATGATCTTATGTTCAATGTTAGCCCAACG
HD3A1003	L21	HD3101031	probe	FBgn0026371	Sak kinase	SAK	213	GGCAATGTACCCAATTCCAA	GTCATCCGATATGCGACAAA	GGCAATGTACCCAATTCCAAACAGGCATCTCTTAAGGAAGATCGCATTTCGGTGCCACCATTGAATACTAAAAGACTGCTTCCGACGCGTTATAAGACGAAGAATGCTATAATGAGTATTTTGCGCAATGGAGAGGTAGTTCTCGAGTTTCTTAAGTTTCGGCCAACCTATAATGAAGATCGCATTAATGATATTTGTCGCATATCGGATGAC
HD3A1003	L22	HD3101127	probe	FBgn0031952	cdc14	cdc14	216	ACTTTGTGGCCTTCAAGAAGAA	CCGGATTCATGGAGGTGTAG	ACTTTGTGGCCTTCAAGAAGAACATCAAGCCAAAGAACACGGTCAACACCCACTACTTCAGCGTCGATGAGGAATTCATCTATGAGAACTTCTACAATGACTTTGGTCCGCTCAACATATGCATGCTCTACAGATACTGCATGAAACTGAACACCAAGCTGAATGCCAAGTGCCATGCCAACAAAAAGATAGTTCACTACACCTCCATGAATCCGG
HD3A1003	L23	HD3101032	probe	FBgn0004655	wings apart-like	wapl	221	GACTTCTGCAGACCGGTGAT	GGATGCAGCATTATTTGTCG	GACTTCTGCAGACCGGTGATTGCCTGCGACACGGAGATTGACTGGCAGCCGACGCTGCTGGATAACATGCAAACGGTGGCGCGTTGTCTGCGAGTCCTCGAAAACGTGACGCAGCACAATGAGACGAACCAGCGCTACATGCTCACCTCTGGCCAGGGAAAAGCAGTGGAGACGCTTTGCCAACTGTACCGTCTTTGCAGCCGACAAATAATGCTGCATCC
HD3A1003	L24	HD3101128	probe	FBgn0002521	pleiohomeotic	pho	204	GAATGCAACGCTCAGGAAAC	TTTCTGATTGACTTTTGTGTTGC	GAATGCAACGCTCAGGAAACATACAAATCTTACCTAACACATGTGCCTACAATTATCCTGGCATTTGAAATGCTTTAATACTAACTTTAAACTCATGCGTATGTGGATTATAGTATTGTAAATATGGCATACGAACGTTTTGGAATTATTCTTCAAAGTGAACAGTACGATGAAGATATAGGCAACACAAAAGTCAATCAGAAA
HD3A1003	M01	HD3100841	probe	FBgn0029800	lin-52	lin-52	89	CTCCCTCCCGAGGATCTG	CGAGTCATCTCCATTGCCTC	CTCCCTCCCGAGGATCTGATCGATAAAATAAAGTCAATGCATGATGAAATTTACCAGCTGGGACTGCGTGAGGCAATGGAGATGACTCG
HD3A1003	M02	HD3100937	empty
HD3A1003	M03	HD3100842	probe	FBgn0039270	Poly-glutamine tract binding protein 1	PQBP1	214	GGCTGGAAGGATGTCTACGA	CGTCGGGTTCATTTTGGTTA	GGCTGGAAGGATGTCTACGATAAGGGCTGCAAGGCGTTTTACTTCTATAACTCGACCACACAGACTGTTTCGTGGCTACCTCCTTCGCATCCCAAAGCACGGATCACCAACAGCGCCGCAGTGTTTCGCAGACAACTGGCCAACTCCAACGATGAGTTCAACTTCGATACCAACATGGTTCAGCCCAAGTCTTCTAACCAAAATGAACCCGACG
HD3A1003	M04	HD3100938	probe	FBgn0011573	Cdc37	Cdc37	201	AAGCCGGATGAGAATCTGTC	CTCCATTTCCAGGTTGATGG	AAGCCGGATGAGAATCTGTCCGAGGAAGAGCGAGAGCAGCGCATGAAGCAATTCGTCAAGGAGAACGAGAAGCTCTGCCAGCAGTATGGCATGCTGCGCAAGTACGACGATTCGAAGCGGTTTCTGCAGGAGCATCTTCACTTGGTGGGCGAGGAGACGGCCAACTACCTAGTCATTTGGTCCATCAACCTGGAAATGGAG
HD3A1003	M05	HD3100843	probe	FBgn0034534	maf-S	maf-S	211	GTCGTACGAGTGGACGGAAC	TTTTTCCGTTTTGGGTTTATTG	GTCGTACGAGTGGACGGAACTGGAGCAGATGCACGAGGACAACGAGCAGGTGCGCCGCGAGGTGTCCAACTGGAAGAACAAGTACAAGGCGCTGCTGCAGTTCGCCATCCAGAACGAGATACCCATTCCCAGCGAGCTGGAGGGCTGCTGAACGATTGCCCAGTCACATTCCTGTTTCTGTCAAAATTACAATAAACCCAAAACGGAAAAA
HD3A1003	M06	HD3100939	probe	FBgn0000063	altered disjunction	ald	213	CTGCAGAGCTACACCACCAA	CGAGAATTTGATGATGCTCGT	CTGCAGAGCTACACCACCAACCTTCCTCTCTATAGCCTGATGAACATCCTGTACCAAATGCTGCAAGCGGTCAACTACATTCACCAACACGGTGTCATCCATTCGGATCTCAAGCCGGCAAATTTCCTGATGGTCAGCGGCAGACTGAAGTTGATCGATTTTGGCATAGCCAGCAATATCGCTGTGGACTCGACGAGCATCATCAAATTCTCG
HD3A1003	M07	HD3100844	probe	FBgn0037301	Mms19	Mms19	214	ACACTGACGGTTAGCCTTGG	GGACGGGCTCTGCAGTAGTA	ACACTGACGGTTAGCCTTGGAGCCCTGCAACCGGTGGAGGTGCAGTCAAATTTCATTGATGTTTGCGTGCGAAATTTCGAGATTTTCTCCACATTTGTCAAACGAAAGATATACACAAATTTATTGCCGCTCATGCCTCAAATAGCGTTCACTCAACGCATTCTAGATTTGGTTATGACACAGACGTTTAACGATACTACTGCAGAGCCCGTCC
HD3A1003	M08	HD3100940	probe	FBgn0010638	Sec61beta	Sec61beta	218	CTCAACGAGCGTGAACAATG	TTGTGGAATGAATTCTCAGCC	CTCAACGAGCGTGAACAATGTCGACGTCATCATTTCTTTTGCGGCGAGATAAGAAGAGATCCATTCCGCTTGTTGAGGCATTGGTGTGTTTCCACATGAAATTAATTATACCTAAGCTTAAGTTAAAAACCTGTTTAAACGTAATGCATATTTTCAAAATTTAATCGTTTTCCCCCAATCCGTTCGTTCATCCGGCGGGCTGAGAATTCATTCCACAA
HD3A1003	M09	HD3100845	control_th	FBgn0260635	thread	th	173	CGGTGAAGGTCTTTAATCGC	ACAACCAGAACACAAAATGGC	CGGTGAAGGTCTTTAATCGCGTCTCCTCGCGGTTTAAATCGTTCATTCTGGTTTTGTTTATATTATTTTTGAATAGCTGGGTCGCGTTCGTGTTGTTATCCACCTGATCAAAAGCGATAGGTCCATAAGACGGAAGATCAGCTACAACAGATGCCATTTTGTGTTCTGGTTGT
HD3A1003	M10	HD3100941	control_th	FBgn0260635	thread	th	173	CGGTGAAGGTCTTTAATCGC	ACAACCAGAACACAAAATGGC	CGGTGAAGGTCTTTAATCGCGTCTCCTCGCGGTTTAAATCGTTCATTCTGGTTTTGTTTATATTATTTTTGAATAGCTGGGTCGCGTTCGTGTTGTTATCCACCTGATCAAAAGCGATAGGTCCATAAGACGGAAGATCAGCTACAACAGATGCCATTTTGTGTTCTGGTTGT
HD3A1003	M11	HD3100846	probe	FBgn0003139	Protein phosphatase V	PpV	201	GATAACGGATGCTAATGGAAGC	GTTTTAATCATATCGTTTTGATCGG	GATAACGGATGCTAATGGAAGCAAGAAGTATATAGAGATTCACTTTGTTATTTTGTATTCCAAACCTACATATTTATTTCTGTGAACAAACACAAAAATCATATACTTTGTACATTTTGTATTAGTAATGCTTTGAAGGAAATAAGAATAACTAAGAATAACCCAATTGTGTGATCCCGATCAAAACGATATGATTAAAAC
HD3A1003	M12	HD3100942	probe	FBgn0038964	Nop56	Nop56	206	TGCCAAGGTCAAGTTCAATG	GGTTCTTGCGATCCTTGATG	TGCCAAGGTCAAGTTCAATGTTCATCGTTCCGACAACATGATCATCCAGTCGATTGCTTTGCTGGATCAGTTGGATAAGGACGTAAATACCTTCTCTATGCGGATACGCGAGTGGTACTCGTATCACTTCCCAGAACTGGTCAAAATCGTTCCCGACAATTACATGTTCGCCAAGGCGGCCAAGTTCATCAAGGATCGCAAGAACC
HD3A1003	M13	HD3100847	probe	FBgn0038903	RpI12	RpI12	205	GGCGAGAAGTCCGAGTTTAC	TAAGGCAGGTAAAGAACACCG	GGCGAGAAGTCCGAGTTTACCATACACTTCAACACCTACGATCCCAGCAAGGTGTTCAACAGGACGAAAAGGGAGTCGGAATCGGACGCGGATGGCCCCGTTGTGGAGAGGAAGTGTCCCAAGTGCAACCACGACAAGATGTCCTATGCCACCCTGCAGCTTCGATCGGCGGACGAAGGCCAGACGGTGTTCTTTACCTGCCTTA
HD3A1003	M14	HD3100943	probe	FBgn0021995	Rs1	Rs1	202	GATGACCAAGATCGCTGCTA	AAATTAAATGCCTTAAAGAAGAAAAAG	GATGACCAAGATCGCTGCTAAGAAAAAGGCGAGCAGTGTGAAGCTGACAAACAAGGCGGGAAAGAATAAGTTCAACAAGGGCAAGAACTTCGGAGGACCTCGTCACGCCAAGAAGGATAAAAAGAAGTAGAGCTGCAAACTACGCTATGTTAAATCGTATACTTGTAAAATAAAACTTTTTCTTCTTTAAGGCATTTAATTT
HD3A1003	M15	HD3100848	probe	FBgn0014127	barren	barr	218	AACGGCAAAAGAAACCCATA	GGACTCTTCGCTGTTCCAAA	AACGGCAAAAGAAACCCATATCCACCGTGACCAAAAACAGAGAAACGCTGAACAGCCGGCTGGATACGGCTCCCTTGCAGGATCCTGTGTTTGGCAAGCTGAACTCCACTGTGGGCTCTATAAATGCTTCCAATCGTCTGATGCACAACATTCTTCCTAGTTTCGACTCTGAATTGCGCTTGCGTACCACCTACAATTTTTGGAACAGCGAAGAGTCC
HD3A1003	M16	HD3100944	probe	FBgn0000611	extradenticle	exd	212	CAAAGGAAATCGAGCGAATG	CTCTTCGGATGGATATGGGTT	CAAAGGAAATCGAGCGAATGGTGCAGATCATCCACAAAAAGTTTAGTTCCATACAAATGCAGCTGAAGCAGTCGACCTGCGAGGCTGTAATGATACTTCGTTCGCGTTTCCTGGACGCACGCCGCAAACGCCGCAATTTCAGCAAGCAGGCATCCGAGATTCTCAACGAGTACTTCTACAGTCACTTGAGCAACCCATATCCATCCGAAGAG
HD3A1003	M17	HD3100849	probe	FBgn0011290	TBP-associated factor 12	Taf12	213	CTTACCAAACCGCGTCTCAC	TATCCACATGTTGTACTTCCGC	CTTACCAAACCGCGTCTCACAGAGCTCGTCCGAGAGGTGGATACCACCACGCAGCTGGACGAGGATGTTGAGGAGCTTCTGCTTCAGATCATCGACGACTTTGTCGAGGACACCGTCAAGTCGACGAGCGCCTTCGCCAAGCACCGAAAGTCTAACAAGATCGAGGTGCGCGACGTGCAGCTGCACTTTGAGCGGAAGTACAACATGTGGATA
HD3A1003	M18	HD3100945	probe	FBgn0038742	Arc42	Arc42	223	GTCGGTGAACAACTCCCTGT	GAAGGCATTTGTGATCCAGG	GTCGGTGAACAACTCCCTGTATCTGGGACCGCTTCTCTCTTTCGGAAACGATGCCCAGAAGAAGGACTACATCACACCGTTTACCACCGGCGAACGAGTGGGCTGCTTCGCGCTCTCTGAACCTGGAAACGGATCCGATGCTGGAGCTGCTTCCACCATAGCAACCGACAAGGGAGATCACTTCGTGCTGAATGGCACCAAGGCCTGGATCACAAATGCCTTC
HD3A1003	M19	HD3100850	probe	FBgn0053051		CG33051	203	CACAGCACAACCCGATTTTA	GTTCGGAATCGGACTCTTGT	CACAGCACAACCCGATTTTAACTACAAAGCCATGCCCCAAGAGCTAAACATCTCCAGTCGAAAACGTCGTGGAGCAGATGCAAGGCCGAATCTGCTGACCAAGAAGACAAACATCGAGGACAGACTGAAGGTTCTGGAGCAGAAAGAACTGAAATCAGGTGGCGGTGAGCAGGACGAGAACAAACAAGAGTCCGATTCCGAAC
HD3A1003	M20	HD3100946	probe	FBgn0026361	Septin 5	Sep5	214	GTTCACGCCTGCCTGTACTT	CGTCCATGGGAAACTGGTAT	GTTCACGCCTGCCTGTACTTCATCTGTCCCACGGGCCATGGTCTGAAAGCTATGGATTTGGTGTGCATGAAGCAGCTTGACACTAGGGTGAACATCATTCCCGTGATCGCGAAGGCCGACACCATCTCCAAGTCGGAGCTGTCGGGGTTTAAGGAACGCATAATGGACGAACTACGGCGGAACAATGTGAGCATATACCAGTTTCCCATGGACG
HD3A1003	M21	HD3100851	probe	FBgn0031610		CG15436	212	GTCCTCACTGTGCCAGTTTCT	CATTACCAACCAATTTTATGCC	GTCCTCACTGTGCCAGTTTCTATAAGCAGAGAAAAACACTTGCTAGACATATCCTCGAGATACACAAGTGACCACTACTTTAAAAACACTTGGAAGACATATCTTCCATGTGCACTACTTTAAAATGGACAAAAATGATTTTGCTAGATGATAAAATAAGCTAACATATTCATAGGTATTGTAAGAATAAGGCATAAAATTGGTTGGTAATG
HD3A1003	M22	HD3100947	probe	FBgn0259984	kuzbanian	kuz	219	CTCGAAAAGAAGTTGCAACAAA	CGAAGGTCGTTGATTGGTCT	CTCGAAAAGAAGTTGCAACAAATAGCAAAAATAATTCGTGCGTGCGAAAAAGTGCTGCGAAGTTTTATGGCCCATGCAAAAAGTGCTAAATTTGTAAATGGCATGGAAAGTGCAAAGCTCTGATTAAAAAACCCGCGAAGATTGGAGTGCGAGGTGCCGCCCAATAACGCAACCAACTACTGCCACAAGGAAATTATTAAGACCAATCAACGACCTTCG
HD3A1003	M23	HD3100852	probe	FBgn0011225	jaguar	jar	204	CGAATCATCTACCGCAACAA	CCTATAGATATCGTTTACCCCGC	CGAATCATCTACCGCAACAAGTGTGTTCTAATAGCCCAGCGTATTGCACGTGGTTTCCTGGCCCGGAAGCAGCATCGCCCACGCTACCAGGGTATTGGCAAGATCAACAAGATCCGGACTAACACCCTCAAGACAATCGAAATAGCAAGTGGACTGAAGATGGGTCGTGAAGAGATTATTAGCGGGGTAAACGATATCTATAGG
HD3A1003	M24	HD3100948	probe	FBgn0039698		CG7789	214	GTTGCATTATCGCCTCCTTG	TGTGTATACTCCGCTGTGCC	GTTGCATTATCGCCTCCTTGGCCAAAAAGTTCCCCACCGTCAAGATCATTGGCGAGGAGGGTGGATCCGATCTGAATGTCTGCGACGACTGGCTGGTGAACGAGTTGGATGAGGAATTCCTGCAGCACAGTTGCCCCGCTGAGTGGAAGGATGTCAAGCCCGAGGACTTTGTCATATGGGTAGATCCCCTAGACGGCACAGCGGAGTATACACA
HD3A1003	N01	HD3101033	probe	FBgn0032346	Csl4	Csl4	211	GCTGGAGCGAGATGCAGT	CCATATTCAGCGTCCTCTGG	GCTGGAGCGAGATGCAGTGCCCCCAGACCACGATCAAGGAGCCACGGAAAGTGGCTAAAGTTCTGCCTGAGAGTTCAATAAATGCTGTGAAATAAGGTCAATCGCATGTTAATCAGAAGCTTAAATTCATTTGTGGAACTAAAAATGTTTTAGTAAGTGATTATTAGCCAAATAATTATATGTCTTGGCAACCAGAGGACGCTGAATATGG
HD3A1003	N02	HD3101129	empty
HD3A1003	N03	HD3101034	probe	FBgn0033752		CG8569	201	AGGGCCAACCTTACCAGTTT	TTTGTTCGCACACAAAGAAGA	AGGGCCAACCTTACCAGTTTCCCGTCAACGAATTGGACAATCAGCCCCTGAATAACACTCAGAACTTGGAGACTCCCCAAACGCCAACGCCCCTGCTCGATCATAATAGCAACATCAATCAGACTTTGCTAGCCACTACGGATTTCCTGAAGCACGAGAACATCGAGTGGGACGACGACGTCTTCTTTGTGTGCGAACAAA
HD3A1003	N04	HD3101130	probe	FBgn0033169		CG11123	206	GATTATGAGCGTAGCGGGAG	CGGTGTATCCCATTTTCAGC	GATTATGAGCGTAGCGGGAGCCAAATTGATGATCCAGCTGTATGCGATGCTCTTCTGCAACCGAATAGGTTACCTAGCTCGGCAGCCAGGAACGAACTTTTCAGTCCAGCGTCTCCTTCAGCACATCAAAGAGGTGCCTGATTTCGAGTCCGTTTTCACCGAACTCCAGCCGCATGTGGAGGAGCTGCTGAAAATGGGATACACCG
HD3A1003	N05	HD3101035	probe	FBgn0003887	beta-Tubulin at 56D	betaTub56D	146	GGCTGAGGTCGACGAGAACT	TGGATCCGACTTTATTGATTACG	GGCTGAGGTCGACGAGAACTAAATTCGAATCGGAAATCAATCGAATTCTCGATCAATGTTTTGCGAAAAAAAATGAAACGAGAACAAATGAATTCAGTTGTAAAAGATTTGTTCTCTTAACAACGTAATCAATAAAGTCGGATCCA
HD3A1003	N06	HD3101131	probe	FBgn0038046		CG5641	225	TCAGCACACCGTACAGATCC	TTGAGAATGCGAATGAGCAC	TCAGCACACCGTACAGATCCATGAGCGGGGCTTCGACATCGCCAACGTGCATGCCAAGGTGCGCATTCTGATCGCCACCTTGCCGCAGAATCTTCGCAAGCTGGAGCCTGAGATCCATTTGGATCACAAACTGATGCAGAGCCATCTGGCTGCCATTCGGCACACGCGCTGGTTTGAGGAAAATGCCCACCACTCCTCGATAAAGGTGCTCATTCGCATTCTCAA
HD3A1003	N07	HD3101036	probe	FBgn0027329	T-cp1zeta	Tcp-1zeta	201	CCCCATCTGGTCACACTTG	TGATATTGATGGCCAGAGCC	CCCCATCTGGTCACACTTGCCATCTGATTTCTTCGATTCGCCTAACTTTAAGCGTGCTTGGATTTGTGCCGATTCCTATTGATTTATTTTGCCGAGCTAAGAAAATCTCTGTTTAATTGCGACACGCGATGGCTTCGATTAGCTTGCTGAACCCCAAGGCCGAGTTTGCCCGCGCCGCCCAGGCTCTGGCCATCAATATCA
HD3A1003	N08	HD3101132	probe	FBgn0027378	MRG15	MRG15	216	TGTCCGAGCTTTACGGATCT	TTGCTTACTGTGCATTTCGC	TGTCCGAGCTTTACGGATCTTTTCACCTGCTGCGTCTGTTTGTCCGCCTTGGCTCAATGCTCAGCTACTCTGCGTTGGATCAGCAGTCCATGCAGAACCTACTCACGCACGTGCAGGATTTCCTTAAATTCCTCGTAAAGAACAGCTCAATATTTTTCAGCATGAGCAACTTTATCAACGTTGATCCCGAGTACGTGCGAAATGCACAGTAAGCAA
HD3A1003	N09	HD3101037	control_th	FBgn0260635	thread	th	173	CGGTGAAGGTCTTTAATCGC	ACAACCAGAACACAAAATGGC	CGGTGAAGGTCTTTAATCGCGTCTCCTCGCGGTTTAAATCGTTCATTCTGGTTTTGTTTATATTATTTTTGAATAGCTGGGTCGCGTTCGTGTTGTTATCCACCTGATCAAAAGCGATAGGTCCATAAGACGGAAGATCAGCTACAACAGATGCCATTTTGTGTTCTGGTTGT
HD3A1003	N10	HD3101133	control_th	FBgn0260635	thread	th	173	CGGTGAAGGTCTTTAATCGC	ACAACCAGAACACAAAATGGC	CGGTGAAGGTCTTTAATCGCGTCTCCTCGCGGTTTAAATCGTTCATTCTGGTTTTGTTTATATTATTTTTGAATAGCTGGGTCGCGTTCGTGTTGTTATCCACCTGATCAAAAGCGATAGGTCCATAAGACGGAAGATCAGCTACAACAGATGCCATTTTGTGTTCTGGTTGT
HD3A1003	N11	HD3101038	probe	FBgn0024432	Dynein light chain 90F	Dlc90F	209	TAGAGTGGAGGAATGGCAGG	TTGCTTGCTAATTGCTTGGA	TAGAGTGGAGGAATGGCAGGACTGCCGGAATTCGCGATGAAGATGACTTAAAAGGGGGAGGGACTAACAAGATTGCCGTCGTACACCAGCACACACCAACAACACAAATACCATACTTTTTTGATCGGCCATCCATCCTGCTGTAATAACAAAATTTATTATGGAGCACTTGAAAACCTTGTCGTCACTTCCAAGCAATTAGCAAGCAA
HD3A1003	N12	HD3101134	probe	FBgn0262937	Rabaptin-5-associated exchange factor for Rab5 ortholog (H. sapiens)	Rabex-5	204	AGCTTGAAATCCAGCGTTTG	GCGTCATCACCACTTTCTCA	AGCTTGAAATCCAGCGTTTGGACAGCGACATCCGCAAGTATATGAACGGAAATGGCGGCAAAAACATCAACGAACTATCAGATTTGGTTCAAAACGCCTACACCAAAGTCTCAGACATTGTGCACAACGATCCCAGCTTCGAGATAGCCACCAACGAGGATCGCGATAGTGCCATTGACTTCTTTGAGAAAGTGGTGATGACGC
HD3A1003	N13	HD3101039	probe	FBgn0260439	Protein phosphatase 2A at 29B	Pp2A-29B	214	AGAGGTCTGCGGCACAGATA	TGCAGCAAAATGCTTGACAT	AGAGGTCTGCGGCACAGATATCACCACCAAGTTGCTGCTGCCCACAGTTCTCCTGCTTGCCGCTGATCCCGTTGCCAATGTTCGTTTCAACGTGGCAAAGACCCTGCAGAAGATCTCGCCCTTCCTGGAGGCCAGCGTCATTGATGCCCAAGTAAAGCCCACACTCGACAAACTGAACACAGACACAGATGTGGATGTCAAGCATTTTGCTGCA
HD3A1003	N14	HD3101135	probe	FBgn0016641	Protein tyrosine phosphatase-ERK/Enhancer of Ras1	PTP-ER	225	CCTAAGGAATCGCCTTTCAA	ATTGCAGCTGGACTTGGAGT	CCTAAGGAATCGCCTTTCAAGCAGAAGTCAATGGATTTGCCGATGCCGACACTCCAGGCAAAGACCACAGTGTCTACATCATCGATGAATCTCCTTCAGCGTCGGGGATCCAATCACAGTTTAACGCTCAACCTGCACAGCTCTTGTGGCAACCTAATGAACAGTGGACTAAGTCATTCCAACTATAGCCTGGGCTCAATACTCAACTCCAAGTCCAGCTGCAAT
HD3A1003	N15	HD3101040	probe	FBgn0000308	chickadee	chic	201	AAAAATCGTCGGTGTTGCG	GAGGCCAGGAGTTGGTTGT	AAAAATCGTCGGTGTTGCGGTTTTTCTTTGTCTCCCTGCCAATTTCGTGTGACCCCCGAAACGAAAGTGCGACTCGCCGTGCGGTAAAGCAACAGCGATCCATATCCAGATCCATATATATCAGTTCAACTTAATCCGCACCCACGACAAACAAAGCACCATGAGCTGGCAAGATTATGTGGACAACCAACTCCTGGCCTC
HD3A1003	N16	HD3101136	probe	FBgn0004198	cut	ct	210	CAGAGGATCTTGAGGAGAACAAG	CGGTGTTGCTGGTATTGTTG	CAGAGGATCTTGAGGAGAACAAGGATGCGGGGGAGGCTAGTTTAAATGTTAGCAATAATCACAATACAACCGATAGCAATAATAGTTGTAGTCGAAAGAACAACAATGGCGGCAATGAAAGTGAGCAACATGTGGCCAGTTCGGCGGAGGACGATGATTGCGCCAACAACAATACAAATACCAGCAATAACAACAATACCAGCAACACCG
HD3A1003	N17	HD3101041	probe	FBgn0003525	string	stg	201	AGCCAAAAACCAAGGACTACC	TCCACAATAGTTTCCCACAGC	AGCCAAAAACCAAGGACTACCATCTCAAATTCTAAAAACAAACTGTAAATGAGTGCAGAGTGACCAAGAACAAATTGTGTTTTAGCAATTTCTTCGGCTTCAGACTCGCCAGCGAAATCAAACATCTTCGGCTCTTCGAAGCAACCAACGCAACACATAACACAACAAAACCAACAAAATGCTGTGGGAAACTATTGTGGA
HD3A1003	N18	HD3101137	probe	FBgn0011703	Ribonucleoside diphosphate reductase large subunit	RnrL	218	GTGCAGCAACTTGTGTACGG	TCAAATTGGATTTCCTTGCC	GTGCAGCAACTTGTGTACGGAAATCGTAGAATACTCCGCACCGGATGAGATAGCAGTCTGCAACTTGGCCTCCATTGCCCTCAACATGTTTGTAACGCCGGAGAAGACGTATGATTTCAAGAAGCTCAAGGAAGTCACCAAGATAGTTACCAAAAATCTAAACAAGATAATTGATATCAACTATTATCCTCTGCCAGAGGCAAGGAAATCCAATTTGA
HD3A1003	N19	HD3101042	probe	FBgn0000588	extra sexcombs	esc	208	CCGTGACTGGGGTCACAC	CATGATTCCTCCGACTCCTC	CCGTGACTGGGGTCACACCATTGCCGCCAAAAAAAAACATTTTCATTCGCCTCGTTATTTAAACATTTAAAAAAAGCATTATCGAATAGTTCATTGAAGTCGCGGCCTAATTTGGGTTTCATTTAACCGTACAAACGTGCCGCGCGTTCGAAATGAGCAGTGATAAAGTGAAAAACGGCAACGAGCCCGAGGAGTCGGAGGAATCATG
HD3A1003	N20	HD3101138	probe	FBgn0032883		CG9323	203	CGGCTGCCTTGTCCTTTA	CAGTGTCATGGAGCTGAGGA	CGGCTGCCTTGTCCTTTAAGTCCCCCTTCTACTCGCCTTTGGGTAAAGAGAGCCGAGTGGATGAAATCAAGCGGAGAATGGCCCGAAATATGCGGAGCGATCACCTGATGGTGCACAATACCATTATTGCGTACCGCGATAGCCGCTATTCGCACGCGGAACGAGACTTCTGCTATAAGAATTTCCTCAGCTCCATGACACTG
HD3A1003	N21	HD3101043	probe	FBgn0014029	Septin 2	Sep2	209	GACCTGGTGTGCATGAAGAA	AAGGGAATGTGCGAGTTCAT	GACCTGGTGTGCATGAAGAAGCTGGACAGCAAGGTGAACATAATTCCGGTGATTGCCAAGGCGGATACCATTTCCAAGGTTGAGCTACAGCGCTTCAAGGCGAAGATCATTCAGGAGCTAAACGCCAATGGAGTGCACATCTACCAGTTCCCCACCGACGATGAGACGGTGGCCGAGACCAACACCAGCATGAACTCGCACATTCCCTT
HD3A1003	N22	HD3101139	probe	FBgn0086451	lethal (2) k09022	l(2)k09022	205	GATCGATGCACCAGAGCC	ATTGCTTGTGGAGGATTTCG	GATCGATGCACCAGAGCCCATGGAAACTAACTCAAACGAAGATGACGATACCATTGTAATTGATTCGGATGATGAGATCGAGACGGAAAAGACCACCTTTCAAGCCTGGTATTCCACTTACCTCGAGAAGCTGGAGAGACGCTATCCAGAAGCTTTTGATCTGAGCGTTAAAGAGGCCTTGAGATCGAAATCCTCCACAAGCAAT
HD3A1003	N23	HD3101044	probe	FBgn0260959	Microcephalin	MCPH1	202	CACTCCCGCAAAGTCTTCAT	AATCCGTGTACGTGATTTGC	CACTCCCGCAAAGTCTTCATCATCAGAGTTGTGTGCCACGACTCCTCTTTCCAAAGCCGTCACAAACAAGGAGGCAGAAAAGTCCAAGAGCAATACAGAAATATCTGAGGCTTCGTTGGATGCCGTTCCGGAAGTGAAGAAATCTACATCAAACGCCGGGGAAGAGAATGAGAAACCAAAGGGCAAATCACGTACACGGATT
HD3A1003	N24	HD3101140	probe	FBgn0037202	Suppressor of Stem-Loop mutation ortholog (S. cerevisiae)	Ssl1	203	ACTTACCCAGGGTTGCCA	TCTTTTCATAGCCCGTTTCC	ACTTACCCAGGGTTGCCACCCAGTGTATTGTATTTAACGTAGGCCCTGTGTGTACACACTGTTACATTAGCCGGCGCATTTTATTTAGCGTTAATTGCTTTTCTTTCTTGATTTGACTTGGTAGTGCATCAGGACTGCAAGTATGGCCGACGATGAGCAAGAGGACCAGAAGGAGTACCGCTGGGAAACGGGCTATGAAAAGA
HD3A1003	O01	HD3100853	probe	FBgn0029911		CG14435	217	CCAGAGCAACTGAACACCTG	TGTGTTTTGGTGTTTGTGCC	CCAGAGCAACTGAACACCTGAGCATCTGAAACATCTGAAACATCTGAGTCCCCGGAATCAGCAGGCGGAGGACAAGAAAACGGGGCAGCAACAATAACAATCGCGACTCAACTACGCACCGATTGACGCCCGCCCCCCGTCCTTGCCACCTACTCCCACCCCCGCCCCCCATCCACTCCACGAGCACCATCACTTTTGGCACAAACACCAAAACACA
HD3A1003	O02	HD3100949	empty
HD3A1003	O03	HD3100854	probe	FBgn0016984	skittles	sktl	210	TCTTCTGCGCGAACGACT	GTGCGGCAATCTTGGATATT	TCTTCTGCGCGAACGACTCATCAACAGTTTTCTCTTGCCGAGAAATATTTGATTTTCGCCTGGTTTTAAAGTTCGCGGAGTGGATACATTGCAGCGGAAGGCTCTCGAAAAATCGGGTTAACTTTTGGCGGACGACGATCGCCGATTGAAGTGGGTGTGGGAAAATGCAAAATGCGGCACTTCGATGAGGAATATCCAAGATTGCCGCAC
HD3A1003	O04	HD3100950	probe	FBgn0043884	multiple ankyrin repeats single KH domain	mask	202	CACACACAAACCCACACACC	TTCGACATTCATTTGTTGCC	CACACACAAACCCACACACCCGCATATACACAAATACATTTACGTTAGGATAAAAGTCAGTCTTATGAATGAAACATTAAATTGAAATGTTTAGCGCCAGCTAAAGTTAAAATACACACAAACTTTTATTACAACACTTATACATAAATACATCTATATATATATTTAATAACATTAATAAAGGCAACAAATGAATGTCGAA
HD3A1003	O05	HD3100855	probe	FBgn0035714		CG8549	207	TGCCATTCATCGTTTGGTT	GCTCCTCCACGAAAGAACCT	TGCCATTCATCGTTTGGTTCGATCGAAAGTGTTTTGGTTTACTTGCACATCGCTAATTCCGCAGCTTGTATTTTAACAACAATGTCCAAAATATTCACGCCCACAAATCAAATACGCCTCACAAATGTCGCCATTGTGAGGCTAAAAAAAGGTGGCAAGCGATTTGAGATCGCCTGCTATAAAAATAAGGTTCTTTCGTGGAGGAGC
HD3A1003	O06	HD3100951	probe	FBgn0023171	ribonuclease H1	rnh1	202	TGGAAGGACGCGTTACAAAT	TCAACAACGTTTTTAACAGGC	TGGAAGGACGCGTTACAAATAATGTAGGTGAAATACAAGCGGCCATTCATGCCATTAAAACAGCTCTTGACTTGGGAATACAGAAGCTGTGCATCAGCACAGACTCTCAGTTTTTGATCAACTCCATAACGCTGTGGGTTGCGGGTTGGAAAAAAAGGGATTGGAAGCTAAAGAACAATCAGCCTGTTAAAAACGTTGTTGA
HD3A1003	O07	HD3100856	probe	FBgn0034646	Rae1	Rae1	222	CCGGGGAATCCAAAAGATAA	AAATCCGCATTTGGTAATGG	CCGGGGAATCCAAAAGATAACTTCACCTTCAAGTGCCACCGTACTACGGGCACCTCAGGCTACCAGGATATTTATGCAGTAAATGACATCGCATTCCACCCTGTGCACGGCACCCTGGTGACCGTTGGCTCAGATGGCACCTTCAGTTTCTGGGACAAGGATGCCCGGACCAAGCTCAAGTCCAGCGAGACCATGGATCAGTCCATTACCAAATGCGGATTT
HD3A1003	O08	HD3100952	probe	FBgn0033690	Endonuclease G	EndoG	212	GCTGTTCCCACCCACTTCTA	TTCTTGCCATTGATGGTGGT	GCTGTTCCCACCCACTTCTACAAGGTTATTGTGGGCGAGTCCGCGGACCACAAACTCCACATGGAGTCGTACGTGATGCCCAATCAGGTGATCAGCAACGACACTCCCATCAGTGTGTTTCAGGTGCCGCCAGAGAGCGTGGAACGCTCGGCGGGATTGCTCTTCTTCGATCAAATCAATCGCAAGCAGCTAACCACCATCAATGGCAAGAA
HD3A1003	O09	HD3100857	probe	FBgn0004893	brother of odd with entrails limited	bowl	206	GGATCCCTATTTGCCCATTC	TCCTCTTTCGCATGGGTATC	GGATCCCTATTTGCCCATTCTGCACGTTCGACGCGACTTGCACCACAAGAGCTTGAACCTTTCGAAGGCTGGTGTTCCACCGCCACCACATACACCACCCACTATAATAACCCAGCCGGAGTCGGGTAAACCACCCAATCAACCTTTGCATTCACCGCATGAAGCTATGCCCAGCTTCCTGGGATCGATACCCATGCGAAAGAGGA
HD3A1003	O10	HD3100953	probe	FBgn0027864	Ogg1	Ogg1	220	TCAGCGAGTTTGTTTCTTTCG	GCATTCTTCGAGGGATAAGC	TCAGCGAGTTTGTTTCTTTCGATTTAAACTCGAGTTTTAATGTGGTTTACTATTTAAACGTGACAAAGTACTATTGTTAAGTATGCCAAAACACGGCTTAAGTTGTTTATAAAACCGGATGCTGGCTCATAACCTAGGTTTCCATAAAAAGCGCCTTTTTTCAAACATGAAGGCTGTTTTACAGGATCGGGGTGTCATAGGCTTATCCCTCGAAGAATGC
HD3A1003	O11	HD3100858	probe	FBgn0013343	Syntaxin 1A	Syx1A	210	CCAAGGGAAAGAGCCAAATA	TGGAGAGCGGCTAATCTGTC	CCAAGGGAAAGAGCCAAATAACAACGAAGCATAAAAAACAATATTTAAAAAAATCCAACAAATTTTGAAAACTGCACCGTAAACAAGGATAGTCCCAGAAATTCGAAACTCCCCAATTATCAAATCGAGAATAATCTTCTCGCACACCCTTCAAAAACCAGGATAATACCCCGACACAAAGATGACTAAAGACAGATTAGCCGCTCTCCA
HD3A1003	O12	HD3100954	probe	FBgn0015331	abstrakt	abs	205	GGATTTGAAGAGGACGTTCG	CCTTTGCCTCTTGCTTAACG	GGATTTGAAGAGGACGTTCGTACGATATTCTCTTTCTTCAAAGGCCAGCGACAGACACTTTTATTCTCTGCCACCATGCCAAAAAAGATCCAGAACTTTGCTCGATCAGCTCTCGTGAAGCCTGTCACAATAAATGTGGGTCGCGCAGGTGCTGCGTCAATGAACGTCACCCAACAGGTTGAGTACGTTAAGCAAGAGGCAAAGG
HD3A1003	O13	HD3100859	probe	FBgn0260632	dorsal	dl	224	AGCAGCAATTGGCACAGTC	CTTTGTGACGCAGGAGACAA	AGCAGCAATTGGCACAGTCCACGAAAAATGTGCGAAAGAAGCCCTACGTAAAGATCACCGAACAACCGGCAGGAAAGGCGCTAAGGTTTCGCTACGAGTGCGAGGGACGCTCGGCGGGATCCATTCCGGGCGTGAACTCTACGCCGGAGAACAAGACCTATCCGACAATCGAAATTGTGGGCTACAAGGGACGCGCCGTAGTTGTTGTCTCCTGCGTCACAAAG
HD3A1003	O14	HD3100955	probe	FBgn0261385	scraps	scra	222	GTTGAGGGTCCTATGGCATT	CAAATGCAAATGCGAGTTGT	GTTGAGGGTCCTATGGCATTTGCGCGTCGTTTTGAAATTATTCAACACATCTGAAAAGCCAACCGCCGAAACGAGCAGAAGCGACGCGCAGAATTTCGAATGCAAACGGACGCGCAACCCGCCAGTGAAAAACAAACATCAAATATCGCCAACGTGGAGTGTCGAGCAGTACAGTGAATTCAATAGCATAGTGCGCGCAATCACAACTCGCATTTGCATTTG
HD3A1003	O15	HD3100860	probe	FBgn0051251		CG31251	209	CAAAGGAGCTCTGGTGGGAT	TTTCAGGCGATCCAGGTTTA	CAAAGGAGCTCTGGTGGGATCGGCTCTTCGAAGGTGATCCAGAAATCGATTCCAAGAAGATTGAATGCGAACGCTATATAGATGATTTGCCGGAGGAAACCCAGGCCACCATAGAAAAGCTTAGGGTCCAGCAGTTGGCAGCAGACAAGCAACAAAATGAAATTCAGACCTCAAGTCCCGACCAAGCTATAAACCTGGATCGCCTGAAA
HD3A1003	O16	HD3100956	probe	FBgn0263510	no child left behind	nclb	222	TCACACAACCTGCCTTGTTT	TTGCGTATCACCGATAATCCT	TCACACAACCTGCCTTGTTTGAACTGCACGTGTTTATCAATTCGTTTGGTGTATCAAACTAAGTTGAAAAATATAATCATAATGGCTGAGGAAGGACCACCGGAGCCGAGCATTGATTTTGTCCCAGCTCTTTGCTTTGTACCACGCGGCGTGGCTAAGGATCGTCCCGACAAGATCGTGCTGACGCAGGCGGAGCTGGCCAGGATTATCGGTGATACGCAA
HD3A1003	O17	HD3100861	probe	FBgn0026430	gamma-tubulin ring protein 84	Grip84	210	TAGGCGCTTTGATCTGGAAT	TCCACATCCACATCCTTTCC	TAGGCGCTTTGATCTGGAATTTACCCAACTGCTGATATCGTTCCTCAAGCAGATCAACAGCATGGCGAAGAAGAACACCGCCGATTGCTTCATGAATCTGGTGCACCGCATCAACTTCAATGCCTTCTACACCGATCAAATGGACAAGATGTGTGTAGAGGATGCCATTGGCTAAGCCAGCACGTCTAGAGGAAAGGATGTGGATGTGGA
HD3A1003	O18	HD3100957	probe	FBgn0004107	cdc2c	cdc2c	203	CACCAAAGAAGAAGAATTTCCC	TTCTAGCCGAATCTTTTTGAGG	CACCAAAGAAGAAGAATTTCCCTCCAAAATATTAGTTTATTTTGCCAACATCGATCTCAAGGATTGTTTACGAGGTTATGACCACCATTCTAGATAACTTTCAACGCGCCGAAAAGATTGGCGAGGGCACCTACGGTATAGTTTACAAAGCGCGTAGCAACTCCACCGGCCAGGATGTGGCCCTCAAAAAGATTCGGCTAGAA
HD3A1003	O19	HD3100862	probe	FBgn0067861	Sperm-specific dynein intermediate chain 1	Sdic1	88	TGCTAAGCTTACAGGATCGTC	TGAGTTTTGAGTTCTGGGTTCT	TGCTAAGCTTACAGGATCGTCCTAGAACAAAATTTAAGTTGTATTTTTGGGATCCCGCTACTGTATAGAACCCAGAACTCAAAACTCA
HD3A1003	O20	HD3100958	probe	FBgn0038769		CG10889	223	CGTGTGTCCTGCTACGATGA	AGCACAGGAAGAGGTCCAGA	CGTGTGTCCTGCTACGATGATCGCTTCATACTCAAGCTGGCAGTGGAAACTGACGGCATTGTAGTCTCCAACGACAACTACAGGGATCTGATCCTGGAGAGTAACGAGTTTAGGCGCGTGGTGCAGGAGCGCCTGTTGATGTACTCTTTTGTAAATGACATCTTCATGCCACCCGACGATCCGCTGGGCAGATCGGGTCCAAATCTGGACCTCTTCCTGTGCT
HD3A1003	O21	HD3100863	probe	FBgn0011297	lethal (2) neighbor of tid	l(2)not	202	AAAAGCAGTGGATGTGTTTCAA	AATATTTGGGCCATAAAATCG	AAAAGCAGTGGATGTGTTTCAAAATGCAATTGTCAAACTCATTGCTATTCAATAAAATTCAAGCAAATCCTCAAATAATGATATTTCTATTGTACTGTATTGAATCATTAACTCTTTTTGGCCAAATTATGAAGGTGAACCCTTAAATCAACCAAAAAATACGTATTTTGGCCAAAACAATCGATTTTATGGCCCAAATATT
HD3A1003	O22	HD3100959	probe	FBgn0004913	Germ line transcription factor 1	Gnf1	216	CAGGAGCTGATTGCCTTGAT	AGCCGCTATGATTTCTTCCA	CAGGAGCTGATTGCCTTGATCAAGGATAGCTCTATTCCAATTATTTGCATGTGTAATGATCGCAACCATCCAAAAATTCGATCCCTGGTTAACTATTGCTACGATCTGCGATTTCAGAGGCCTCGCCTCGAGCAAATCAAAGGGAAAATAATGAGCATCTGCTTTAAGGAAAAAGTAAAGATATCACCGGCCAAAGTGGAAGAAATCATAGCGGCT
HD3A1003	O23	HD3100864	probe	FBgn0032401	Promyelocytic leukemia zinc finger ortholog	Plzf	202	GCCGCTACACTCCAAGGTAT	GATGGTGATCTTCAGCGGAT	GCCGCTACACTCCAAGGTATCGAACTATCTAAACAATCAGCGAAGAACCGGACAATTCTGTGACCTGCTCCTCGAACTGGATTCGGATGATTCCCTCAGCTTAAGCGTCCATTTCTGCGTACTGGCTGCTCAGAGCCAGTTTATAAACTCTAACCAGAAGCAACAGCAGTTCTCCATTCACAATCCGCTGAAGATCACCATC
HD3A1003	O24	HD3100960	probe	FBgn0000711	flapwing	flw	201	CCTCGTGCAACATCAGTGAA	CGACGCCCGTTAGCTTAT	CCTCGTGCAACATCAGTGAACATCAGCGGCCCACCGTACAAAATCTCAATAAGAAAAAAAGAGAGCATAAAGTGAAATTGCCTTTTGCGGCAAGTAAGAAAACGACCAAAAAAGAGAAAAGAATATAACGACTATTTGAATTAAACAAAGTTTATTGTTTACAATAGCATACAATACAAGTTTATAAGCTAACGGGCGTCG
HD3A1003	P01	HD3101045	probe	FBgn0024889	karyopherin alpha1	Kap-alpha1	207	GGCATGACGAGATTGCTTTC	GCGATTCGCATAACAAAATG	GGCATGACGAGATTGCTTTCATTTAGTTCGATTGTACTAATTTAATATGTTATACAGAACCCATTGTATATGTTTTTGCTTTCCTCAAATTGAGTCTGTAAATATTTTCCATTTTATATATATATTTTCCAGCCCAAGTACGATGAGATCCTCACATGGTGTTGTTATACATTCTGATTCATTTGATCATTTTGTTATGCGAATCGC
HD3A1003	P02	HD3101141	empty
HD3A1003	P03	HD3101046	probe	FBgn0050389		CG30389	207	AACGACGCTAGCTCGGTATC	TGATTTGCTGGTGAGATTGG	AACGACGCTAGCTCGGTATCATCTTCAGCGAGCTCCACCTCCAGCAATGCCATCGCGAACCTGGCCAGCAAGGTGGTCTCCAAGATCTGTGAAACGTGTCTCAAACTGGAGGCCGATGTGAAAAAGTATCGAGCTGAAATCAGCCATATGAAGCAAATCGAAAACGAATTGCGGCAAAAGCTGGACGCCAATCTCACCAGCAAATCA
HD3A1003	P04	HD3101142	probe	FBgn0025807	Rad9	Rad9	225	GATCACAAGCTGTTGACGGA	TGCTCGGAATTCCTTAATGC	GATCACAAGCTGTTGACGGATATATCCAATAACTTTAACTCCTCAGAGGAGGAACTTACTTTGGAGGCAAACTCGGGCAGTGTGGTGGCCAAAAACTACATAGAAGGAGCCCGAGTTAATGATAAGTTCATGCGCACGCAGCTGAAACTTAAGCCCAGTGAATTTGAGCAGTACCAGGTAACGAAGGAGACGGTCATTACATTCTGCATTAAGGAATTCCGAGCA
HD3A1003	P05	HD3101047	probe	FBgn0003371	shaggy	sgg	201	AGCTCTCAATACAGCCCAGC	CAGCTGCTGCTGTACCCT	AGCTCTCAATACAGCCCAGCCTAGTGCCGCAGTTGTTGCCCAAGCATCTGCAGAACGCATCCGGACCTGGCGGCAATCGACCCTCGGCCGGCGGAGCAGCCTCCATTGCGGCCAGCGGCTCCACCAGCGTCTCGTCAACGGGCAGTGGTGCCTCGGTGGAAGGATCCGCCCAGCCACAGTCGCAGGGTACAGCAGCAGCTG
HD3A1003	P06	HD3101143	probe	FBgn0033351		CG8235	202	CAGCTCAACCCCAAGAAGAA	GCGGTGATGTTTCGTTTATTG	CAGCTCAACCCCAAGAAGAAGATCTTTGAGTCGTGCGCCCCGGATCTGAAGACCAACGGCGAACTGGTTGCCTGCTACAAGGGCGCCGCTCTCCATGTTCCTGGCAAGGGCAACGTGGTGGCCCAAACCCTGAAGAACGTCAATGTGAAGTGAGCCAATAAACGAAACTAAAGCTTTGAGCCAATAAACGAAACATCACCGC
HD3A1003	P07	HD3101048	probe	FBgn0015553	tosca	tos	223	AGCTGAGCTCTCACTCAGGC	CCTTCAGTTGGTATTTGGGG	AGCTGAGCTCTCACTCAGGCCATAAGAAACTAAGACTAGTATGTAAAGACATTCCAGGGAAGAACCCAATAAGACAACGTTGTAGTTCACAAATCAGTGACGGTGAAACAGATACAGATACCACAGCCTCTTCTCTTTTGGAATCACAAGATAAAGGTGTTCCTTCGCCTTTAGAATCCCAAGAAGATCTCAACAACTCTCAACCCCAAATACCAACTGAAGG
HD3A1003	P08	HD3101144	probe	FBgn0052396		CG32396	204	CTCCGGCTTGACCTCTCTAA	TTGCAGATTTGGAACAGTGC	CTCCGGCTTGACCTCTCTAATAATGGAGGCCCTGGTGGAGCAGTATCCGGATAATTTACTCTGCAACTATGTGACCATTCCGTCGCCGAATATGTCGCAGGTGGTTGTGGAACCCTATAATGCCCTACTTAGTACTCCCGCCTTGGTTAACAATTCGCATTTAACCTTCTGCCTTGATAACGAGGCACTGTTCCAAATCTGCAA
HD3A1003	P09	HD3101049	probe	FBgn0024887	kin17	kin17	205	CTGGACGAGATCATCAAGCA	CCACTTTTAGCTTTTCCCCA	CTGGACGAGATCATCAAGCAGGAGGAAAGCAAAAAGGAGCGTGCCAACCGCAAGGACTACTGGCTGCACAAGGGTATCGTGGTCAAATTTATTTCCAAATCCATGGGCGAAAAGTTCTTCAAACAAAAAGCGGTTGTCCTGGACGTAATTGACAGATATCAGGGCAAAATCAAGTTCTTGGAGACTGGGGAAAAGCTAAAAGTGG
HD3A1003	P10	HD3101145	probe	FBgn0026428	HDAC6	HDAC6	205	GGCTCCACCATCGAATTG	CATGATGCACATCGTAGTCG	GGCTCCACCATCGAATTGGTGGACCATCTGGTCGCCGGAAAGGCGCAGAATGGCATGGCCATCATCCGGCCACCGGGTCACCATGCGATGAAGGCCGAGTACAACGGTTATTGCTTCTTCAACAACGTGGCACTGGCCACCCAGCACGCCCTCGATGTTCACAAGCTGCAGCGCATCCTGATCATCGACTACGATGTGCATCATG
HD3A1003	P11	HD3101050	probe	FBgn0015799	Retinoblastoma-family protein	Rbf	203	GGACCTGGTGACATCCTACAA	CCTTCATGGCTTTAGCCTCC	GGACCTGGTGACATCCTACAATCTGATGATTTGCTGCATAGACCTGATATACAACAATGTGCTGGCCGAGAAGCGCACCGATCTCATCAACCCCAAATTCGAGGGCCTGCCGAGCAACTGGACGGAGCTGGACTTTCGTCACAATCCGCACTGCATTTTGTCCAACTTCTGTGACATGACCGAGGAGGCTAAAGCCATGAAGG
HD3A1003	P12	HD3101146	probe	FBgn0031637		CG2950	211	AGGTGCGGAAACAGCTTCTA	CTCAATGTTTTTCACGGCG	AGGTGCGGAAACAGCTTCTACGATTCATTTTTGATCAATTCTTCAACAACATTTAAACGAACGAATAAGTTAGCAGACCATATAGACTGAAATCAGCAGATCCGGACACCAGGCGGGACAACCTTAAGACTTCTTCACGAGACGATATCGAATCCAACGAATCCCGAGAATGGCTCACACACACCTGGGACGCGCCGTGAAAAACATTGAG
HD3A1003	P13	HD3101051	probe	FBgn0020261	pacman	pcm	200	CCTCGCCTACTTGCAACTTT	GCCAATTCGCTGAGGCAC	CCTCGCCTACTTGCAACTTTTGTGTCAATCAATACATGTTGAAAACAGATAAAGACACAAATTTTTCAGTTCATCTAAATTGCCACTGATCCAGGCAGAACAGCACGGCGGCAGAACAGTCCCATCCAGAACAGCGACATGGGCGTTCCCAAGTTCTTTCGCTACATCAGCGAGCGATATCCGTGCCTCAGCGAATTGGC
HD3A1003	P14	HD3101147	probe	FBgn0034176	prenyl protease type I	ste24a	202	GGCTTCCCCGTTTACGAT	AGCTTGTTGGGGTAAGTCCC	GGCTTCCCCGTTTACGATTGGCTGTACTCGACTTGGAACCACTCACATCCGACTCTTCTCCAGCGCCTGAATCGACTCAAGGAGCTCAAGGAAGAGAAGAAACTGAACTAAGACAGCTCACTTCACATAAGACCAAAGTTTACACTATTCCCTTTGATTTAACGTACACAAAATAAAGTAAGGGGACTTACCCCAACAAGCT
HD3A1003	P15	HD3101052	probe	FBgn0032157	Etl1 homologue	Etl1	209	TCGTCCTACCGCTGTCAAAT	GCCTTGGTTTATCGTGGAAA	TCGTCCTACCGCTGTCAAATCCTGTTAACATCGTTTGAATTATTCTAACAATATTGTATTTGTATATTTTTTAAACTTGTATGCAAGGAGAGATTTGGTGTATGGTATGCCAAAAGTGGATCATAAATCGAGTTAGTAATTTTTCACCGTTGAGGCGACATTAGTTTTTCTTCATTAGTAACAGCAACATTTCCACGATAAACCAAGGC
HD3A1003	P16	HD3101148	probe	FBgn0082831	protein partner of snf	pps	205	GCAGGGTAACTGCCATCAAT	CTGACGCGAGTCCAGGTATT	GCAGGGTAACTGCCATCAATTGGGTAACCTGATGCCAAGTCAGATGGACGTAATCGGTCGCATAACCCGCGTTAATGTCTGGGAATATATCAAGAAGCTAAAGAAGAGTCCCACAAAGGAAGTGGTCATTGTGAACATATTCCCCGCCTCGCCCAGCGAAACGTATAAGTTTGATCTCTTCTTCGAATACCTGGACTCGCGTCAG
HD3A1003	P17	HD3101053	probe	FBgn0029903	pod1	pod1	210	GAGCCACCGGACTAGTGACA	CGGCATTTTTGTACTTGGAA	GAGCCACCGGACTAGTGACACTCGACCATCAGGCATCAAGCATCGGGCATATACAATCCACAATCGACTCTCTACACTCGAGCAGAGAACGTCCATATCCATATCCACATCCGCATCGGATCGCCATCACATCGGATCGAAGCCCTCCCAGCTCAACCAAGTAGCCAACCATGGCCTGGCGATTCAAGGCTTCCAAGTACAAAAATGCCG
HD3A1003	P18	HD3101149	probe	FBgn0003205	Ras oncogene at 85D	Ras85D	201	ACAAACAAGCAAAAGCCGAT	GGCTGTTTGTTTTCTCTCCG	ACAAACAAGCAAAAGCCGATAAGCTCACAGCAACTTTCGCACAAACGAGTAAATTCGCTAGCCCCAAACTAGATTTATGTTCGGTTAAACACATATCTGTGGTGCTACGATGATGAAATTATAATCCGTATGAGTTCTTGAGATTTGCCTTTCTTTCTACTTACCATACTGACAGATCAATCGGAGAGAAAACAAACAGCC
HD3A1003	P19	HD3101054	probe	FBgn0086358	TAK1-associated binding protein 2	Tab2	206	ACAACAGGAAGCCAGCAGTG	GCACTGGGATAGGATGAAGC	ACAACAGGAAGCCAGCAGTGGCAAGGCCAAGCCGAGCTGCCATTGCACCAACATTAGTATTATGCACCTGTTTCATGAGATGAAGCAGGAGTTCCCCACGATACCCGATGCCATAGTGACGCAATGCGTCAATGAGAATTGCCATCAGCGCGAAAACTGTATCCAGATGTTGAGGAAGGAGCTCGCGCTTCATCCTATCCCAGTGC
HD3A1003	P20	HD3101150	probe	FBgn0010328	without children	woc	225	CAAGGAGCGAGAGTTGTGCT	TGCGTTTGTATGTGAGTGGG	CAAGGAGCGAGAGTTGTGCTATATTATAAATTGTTTTAAACTTATTTGTACGCATATTTCGATTGTCTCTAGTTGCGATAACGCTGATGGAGGTGACCTTGTATAAAATGTGAACGCCAACCAAGCACATCTCACTTTCGATTGACTAAACTTAATCTAGGAATCAAAAAAATCCAAGCAGCAATATACACAACTAAACTTAACACCCACTCACATACAAACGCA
HD3A1003	P21	HD3101055	probe	FBgn0032907		CG9272	207	GGTTCGGCTACTGTGGTCAT	CGCAGTTCTGGAGTTTCTCA	GGTTCGGCTACTGTGGTCATATGCAAGGTGGTCCCTGATGCTGTGGACTCCCCAGTGAGAGTGGATAAGATAAGAGAGGAGGTGGAACCCCAAATAAAACAGGAAGCTCCGGAGGATTCCCCTTCTTTTTCTGAGGTGCAAGCACCACATCCTTTGTGGTTTAACCACCTAGAAAACATTCGCATTATGAGAAACTCCAGAACTGCG
HD3A1003	P22	HD3101151	probe	FBgn0037703	JmjC domain-containing histone demethylase 2	JHDM2	205	CCCCACATCAGGTTCAAAAT	ACAGCTCTGGTCAGGATGGT	CCCCACATCAGGTTCAAAATCTCCACAACTGTATTAAGGTGGCCGAGGATTTTGTATCGCCGGAAAATATCACGCACTGCTATCATCTAACTCACGAGTTTAGAAGGCTTTCGCACTCGCACACAAATCACGAGGACAAGCTTCAGATCAAGAATATTATCTACCATGCCATCAAGGACTGTTGCACCATCCTGACCAGAGCTGT
HD3A1003	P23	HD3101056	probe	FBgn0029152	Makorin 1	Mkrn1	210	CAAAACCAGAAGGAACCTTGA	GATTGGTGTGTGCGTTTCAC	CAAAACCAGAAGGAACCTTGATATATCATTAAATTTCAATACACAACTTTAAGAGTTAAGCAGGAAACAGTACATTTTCAAAACTGGTGACTGTAAATTATGGCTTTCAGACTGAATTGTAAAGATAAAAATGCATACATTCTTTAATCGGTTTTCTACTCATTTTTTGAAGTTTAACAACTACAACTAAGTGAAACGCACACACCAATC
HD3A1003	P24	HD3101152	probe	FBgn0015269	Neurofibromin 1	Nf1	225	ACCGCATCTGACTCTGGAAT	GCCTGCACTGAGGGATACAT	ACCGCATCTGACTCTGGAATTCCTTGAGGAGTCCATTCAGGGCTTCCAGCGCAGCACCATAGAGCTGAAACATTTGTGTTTGGAGTACATGACGCCATGGTTAAAGAACCTAGTCAAATTTTGCAAGTCCAACGATGACTCCAAAAAGCTTAAGGTCTCCCAAATTCTGGACAAGCTCATCAATTTAACTATTGACCAAAAGGAAATGTATCCCTCAGTGCAGGC
HD3A1004	A01	HD3101153	empty
HD3A1004	A02	HD3101249	empty
HD3A1004	A03	HD3101154	probe	FBgn0034814		CG9890	211	GCGGTCACACTTATTCGTGG	GCTCCATATACAAATGCGCC	GCGGTCACACTTATTCGTGGAGCACCAGGAGAACGTAAACAAATGGAGCACGAGGTGGCTGTTTCAGGAGGGGATTCCTCGCTGGAGGAGATCACTGGCAGTTCGAAACTCAAGCCCTCCAAGAACACGGCCATCAAGTGCCTGAAATGCGACAAGGTGTACATATTTCCGTCAGATAAAGATGACTGCCTGGCGCATTTGTATATGGAGC
HD3A1004	A04	HD3101250	probe	FBgn0028931		CG16863	203	GTGTCGACAAGGAGCAGTCA	TGTATGGAATCCAGTTGGGG	GTGTCGACAAGGAGCAGTCAACTACTGGAGGATGCGGTGACATCGTTCATGGGCGCTCATCATCATGTTCCCTGCTTCGCAGACCAATTGAATTCTATTTTAGAGGAGGTGGTGCAGCGCCCAGAAATACGTCATTTGCGCGACAAGGTGCGTTCCCATGTGCAGTCCACATTGCAGCTGAATCCCCAACTGGATTCCATACA
HD3A1004	A05	HD3101155	probe	FBgn0027053	COP9 complex homolog subunit 5	CSN5	212	GCTCCACCATTGAACTGATACA	CAGCCTATGAGGCGGTTTTA	GCTCCACCATTGAACTGATACACGGCTTGATGGCTCAGATTGTTAAGGACAAACTTTTCAACAAGGTCGGACTGGGCAAATAGTTCAACACTAAAATTCGCAATGAATTTTAAAATGCATTGTGAATTTTCTTTTCATTTCCCTGGGAAATATTTAAGTAAGTCAAGCTTATCCAAAAGAAAAAGGAAATTATAAAACCGCCTCATAGGCTG
HD3A1004	A06	HD3101251	probe	FBgn0261530	nbs	nbs	205	GCCTTGAGCTGCTAAACGAA	CTTTCCGTTTCGGGTACAAA	GCCTTGAGCTGCTAAACGAAAGCGACAGCGATGATTGTGATAATCTTTTTAACTTTGCAGACAGCAAAAAGAAACGAAAGACGCAAGAGGCTCAGAGAAATGATGACTCCACGGATGGCTTGTTTAACTTCAACTCTGAAAGACCGTCTGATCATGATGACGAGGATTCCCGGTTAACCGAACCATTTGTACCCGAAACGGAAAG
HD3A1004	A07	HD3101156	probe	FBgn0015806	RPS6-p70-protein kinase	S6k	225	CAAGAAGACCATCGAGACCA	AAGAGCGGTTTTATAGGCGG	CAAGAAGACCATCGAGACCATTCTGAAAGCCAAGCTCAATCTGCCAGCCTACCTCACACCGGAAGCCAGGGATCTGGTGCGTCGCCTGATGAAGCGGCAGGAACCTCAGCGCCTTGGCAGCGGACCCGAGGATGCGGCGGCTGTTCAAATACACCCATTCTTCAAACACGTCAACTGGGACGATGTGCTCGCCAGACGCCTCGAGCCGCCTATAAAACCGCTCTT
HD3A1004	A08	HD3101252	probe	FBgn0036661		CG9705	222	GGAAAACCGGAACAGAACAA	AAGGCAATATTTGTGACTGCG	GGAAAACCGGAACAGAACAATAACCATGAAAGTAAACGAAAGCACAGCAATCGAAGCAGCCAGGAAAAAGCCGAAACCAGACCAGAACGTAATAGAATGGAACAACAGGCCTGCCATCCAGCCAGCCAGCGAGCAGCATCACAAGAGTTTCAATTGAACACTTAATTAGAATTTAAGCTAAGCTATGGAAGTCAAACAAAACGCAGTCACAAATATTGCCTT
HD3A1004	A09	HD3101157	control_rh3	FBgn0003249	Rhodopsin 3	Rh3	171	GTCTTCTCCGCAGCCAAAT	GGAGCCAATGATTCCAAAGA	GTCTTCTCCGCAGCCAAATCGCTGCGAACTCCCTCCAATATACTGGTCATCAATCTGGCCTTCTGCGACTTCATGATGATGGTCAAGACTCCGATATTCATCTACAATAGCTTCCACCAGGGATATGCGCTGGGTCATCTGGGATGCCAGATCTTTGGAATCATTGGCTCC
HD3A1004	A10	HD3101253	control_th	FBgn0260635	thread	th	173	CGGTGAAGGTCTTTAATCGC	ACAACCAGAACACAAAATGGC	CGGTGAAGGTCTTTAATCGCGTCTCCTCGCGGTTTAAATCGTTCATTCTGGTTTTGTTTATATTATTTTTGAATAGCTGGGTCGCGTTCGTGTTGTTATCCACCTGATCAAAAGCGATAGGTCCATAAGACGGAAGATCAGCTACAACAGATGCCATTTTGTGTTCTGGTTGT
HD3A1004	A11	HD3101158	probe	FBgn0029006	lethal with a checkpoint kinase	lack	202	GATGGAACTGGGCAGGTGTA	CAGCTCCTTTGAGGCTCTGT	GATGGAACTGGGCAGGTGTACTCGACGGAAATAAGCAAATCCTCTCTGGATCCAAAATGGAATGCACATTACGATTTGTTTTTGGGCATTGGGGATGCCATTACGATAACTGTGTGGAATCAGCGAAAGATACACAAGGGCAGTGGATTCCTGGGCTGTGTGAGGATACCGGCGTTCAACATACAGAGCCTCAAAGGAGCTG
HD3A1004	A12	HD3101254	probe	FBgn0033092		CG9422	217	AAAGCCAAATACGTCCACTGA	ACCTTGACTCTAACTGGCGG	AAAGCCAAATACGTCCACTGATTTTTGGGATGGCGGAGGAGCACAGCAACAGCCACATCCACGTTCCCAGCCCCGCCATCAGCAGCAGCCACATAAACCAGGGGCTGGGCGTGGGGGTCGGCCGAACAAACGGACCAGACCCGGACGCAATAAACCAGGCCAACAACCCGAAAAACCTGCCGCTGAAGAGAATTTACCCGCCAGTTAGAGTCAAGGT
HD3A1004	A13	HD3101159	probe	FBgn0004362	High mobility group protein D	HmgD	212	TCATCGACAACTTGAACAACG	CTCAACGCACATCCTGCTAA	TCATCGACAACTTGAACAACGAGATCTGTTGAACATTGTATCCACAATCACATACGCGAGAGAACAAAAATACGCGATAATAAGGAAAATTGTATTTATACACACGAGTTTTTAAGTTTATAGTAGTCGTTTATTTTATAATGCCCATATACAAAGAAGAGGACAACCGGCAGGAAAGGAGAAGAAATAAGATTAGCAGGATGTGCGTTGAG
HD3A1004	A14	HD3101255	probe	FBgn0040239	bc10	bc10	201	CCCATTGCATTATTTCCAGC	GTGGGTTGGATAGGGGTTTT	CCCATTGCATTATTTCCAGCCCTCTATATGTTACCTTCATAATTCTCTTGATTATGAATTGTAATTGTATTGTATGTTTTGTTTTTAAAGCTTAGACGAATTTAGTTTATACGAAGAAAGCGCTACGAAAACGTATTGTACATCACCCCACCCAAAAGCCCTACCCTTCAAATCAAAAGAAAAAACCCCTATCCAACCCAC
HD3A1004	A15	HD3101160	probe	FBgn0014037	Su(Tpl)	Su(Tpl)	218	GCCACCTTCCACACAACAAT	TCGAATTGGTCATAACGTGC	GCCACCTTCCACACAACAATAACTAGCACAGCCCAGCCCCTTCCACAATTTCCAAGCTGGCCCAAACAACACAACCAAGTGCAACTTTCCAAACTACAACAACTACTACTGATCCGATCCATCACAATCCGTTTCATAAATTTTCCGGAAACAATCGAGTGGCTATCTAATTGCTATCTAATTAGCGGCTAGTTGCGCGCACGTTATGACCAATTCGA
HD3A1004	A16	HD3101256	probe	FBgn0266411	similar	sima	216	TGTGTGTGTGCGTAGTGACAA	GTCTCCGGATTTCAAAGTGC	TGTGTGTGTGCGTAGTGACAACAATACAAACGCAGAAACCAATACAAGCGCACAATAGTTTTCATACATAGGAAAACAACGAAAGTAACAGCGATAAATAATAGAAAACAACAACGAAGAGTCTCAAAAAGTGCTGGAAAAACTCGCGATAAGGAAAACAGGAACCTCCACATCGGCAGATCTTTTGAATGCTGCCGCACTTTGAAATCCGGAGAC
HD3A1004	A17	HD3101161	probe	FBgn0032956	Cullin-2	Cul-2	205	CCAAGCGGCTTATTTTGTCT	CAATTGAATAGGACACACGCA	CCAAGCGGCTTATTTTGTCTAAAAAGAACTACCTACAATGTTAAAAAAAGAAATCAAAAGGTCAAGCAATTTGAGTTTTGTTATTTTTGTGGTCATAGCATATTGGTATGAAAGGTGTGTGGAAATCAAACGACGTTACTGATACTTTTAATTTAGCTTAGTTAGTTGATCCATTTTGATTTAATGCGTGTGTCCTATTCAATTG
HD3A1004	A18	HD3101257	probe	FBgn0031252		CG13690	216	GCGTCAATATAGCCGAGGTT	TGTCCTTAATGACCAAGCCC	GCGTCAATATAGCCGAGGTTTATGTGGATACGGTGGGTCCGCCGGAGAAGTACCAGGAGAAGTTGCTCAAACGTTTCCCCAGCTTTAAAATCACCGTGGCGAAAAAAGCTGACTCCACCTATCCAATAGTCTCTGCTGCTAGTATATGCGCCAAAGTTACCCGTGATCATGCCCTCAAGGTGTGGAGCTTCCCCGAGGGCTTGGTCATTAAGGACA
HD3A1004	A19	HD3101162	probe	FBgn0025111	Adenine nucleotide translocase 2	Ant2	225	ACGGCCTGATCGATTGTCTA	GATAGGAGGCAATACCGGC	ACGGCCTGATCGATTGTCTAATGAAGGTGATCAAGAGTGACGGACCCATCGGTCTGTACCGTGGATTCATCGTGTCGGTGCAGGGCATCGTCATCTACCGAGCAGCATACTTTGGATTCTATGACACTTGCCGCGACTTTCTGCCGAATCCGAAGAGCACACCGTTCTATGTGAGCTGGGCGATTGCCCAGGTGGTCACAACCGTTGCCGGTATTGCCTCCTATC
HD3A1004	A20	HD3101258	probe	FBgn0043364	cabut	cbt	204	CGCCAGCTAAACAGAGATGA	TCCTGGAAAGAAGTGGCATC	CGCCAGCTAAACAGAGATGAATTCCCACCAAATTTCAAAACAAATTAACATCTGAGTCAAATTCGAAATGCCTTCTCGCTCTCATGTAGCTGGTGTAGACTTAAGCTTAGTTAGGAGCTAGATCTTGTCACCGTTTTGTGCATATATCAACTTCAAATTCAATACGTAATACCCAAATCGGATAGATGCCACTTCTTTCCAGGA
HD3A1004	A21	HD3101163	probe	FBgn0028411	NTF2-related export protein 1	Nxt1	203	CCATCCTCAAACCACCAGTT	TCCTGCATTCGGTAGCAATC	CCATCCTCAAACCACCAGTTGAACACCCTGGACGCGCAGCCTATTGTGGATCAGGCTGTGTCCAACCAGCTGGCCTACCTCATCATGGCCAGCGGCTCCGTCAAGTTCGCAGATCAGCAGTTACGCAAATTTCAGCAGACTTTCATCGTTACCGCCGAGAATGATAAATGGAAGGTCGTCTCCGATTGCTACCGAATGCAGGA
HD3A1004	A22	HD3101259	probe	FBgn0037121	Rpb8	Rpb8	204	CGGACAGCTTTGAGTACGTG	AGAAAATTCAGAAGGCCAGC	CGGACAGCTTTGAGTACGTGATGTACGGCAAGATCTACAGGATCGAGGGCGACGAAGCACACAATGAGGCCTCCCGGCTCTCCGCCTACGTGTCATTCGGCGGCTTGCTGATGCGACTTCAGGGTGACGCCAACAATCTTCATGGCTTCGAGGTGGACCAGCACATGTACCTGCTGATGAAGCGGCTGGCCTTCTGAATTTTCT
HD3A1004	A23	HD3101164	probe	FBgn0086129	something that sticks like glue	snama	203	AGGACCAGCAAGAGGTCAAA	GTCACAAAAGGAACTTCCGC	AGGACCAGCAAGAGGTCAAACGGAATACTGGTATTCCGCGGTCTTTCCGCGACAAGCCAGATGCGGCTGAGAACGAATCAGCCGATTTTGTGCTGCCTGCTGTACAAAACCAAGAGATACCGGAGGATCTGATATGCGGCATATGCCGAGATATATTCGTCGATGCTGTCATGATACCCTGCTGCGGAAGTTCCTTTTGTGAC
HD3A1004	A24	HD3101260	probe	FBgn0022764	Sin3A	Sin3A	212	GGACCTGGTCATCGAGGTTA	CAAACGGATTTTTCTTCATTCC	GGACCTGGTCATCGAGGTTAATAGTGCCACGATTCGAGTGCTGGAGAACTTACAGAAGAAAATGTCACGAATGTCCACCGAGGAATTGAGCAAATTCCATCTGGACGATCATCTGGGCGGCACATCTCAAACGATACACCAGCGGGCCATTCATCGCATCTACGGCGACAAGTCGGGAGAGATAATCACGGGAATGAAGAAAAATCCGTTTG
HD3A1004	B01	HD3101345	empty
HD3A1004	B02	HD3101441	empty
HD3A1004	B03	HD3101346	probe	FBgn0032847	TBP-associated factor 13	Taf13	223	GGATTCGGAGACGACAAAAA	CCTTTCGTGCCTTTTTCAAC	GGATTCGGAGACGACAAAAATCCATACACGGAAACCGTAGATCTGCTGGAAGACCTGGTCATTGAGTATATAGCTGAGACCACTCACCGGGCAATGGAGATCGGTCGAACAGGCCGTGTTCAAGTCGAAGACATTATCTTCCTGGTGCGCAAAGATCCCCGAAAGTACGCTAGGGTGAAGGATCTTCTGACCATGAACGAGGAGTTGAAAAAGGCACGAAAGG
HD3A1004	B04	HD3101442	probe	FBgn0024291	Sir2	Sir2	221	TGCAGCCTGGAACATTCTATT	CGGTAGCAATGGTGACAATG	TGCAGCCTGGAACATTCTATTCGCACACCAACAACTATTCGTATGTGTTTCCAGGAGCCCAGGTATTCTGGGACAACGATTACAGCGATGATGATGACGAAGAAGAGGAAAGATCACACAATAGACACAGTGATCTCTTTGGCAATGTGGGGCACAATTATAAGGATGATGATGAGGATGCATGTGATCTGAACGCCGTTCCATTGTCACCATTGCTACCG
HD3A1004	B05	HD3101347	probe	FBgn0038585		CG7993	202	TGAAGAACGATGCTGCTTTG	CATTTCGGACCATTGAACAC	TGAAGAACGATGCTGCTTTGTTCACGTTCGGTTCCACGTCCAAGAAGCGACCCGATAACATTATACTGGGCAGGATCTTCGAGAACGAGGTGCTGGACATGTTTGAACTGGGCATCAAGCGGTATCAGGCGATTTCCGAGTTTAAGAACGAGAAAATCGGAGCCTGCGTCAAGCCCTGCCTGGTGTTCAATGGTCCGAAATG
HD3A1004	B06	HD3101443	probe	FBgn0030354	Upf1	Upf1	207	GAGCGGAGCTTGAATCAGTT	CTTAGGTCGCATTGTTTCCC	GAGCGGAGCTTGAATCAGTTCTCACAGCCTTATTGAGAATCCGGTTGGAGGTGCAACAACTACAAACGATAACAAGCAACACAAACGAAACAACAACAAACTCAACTTTGAAGTCATCATCAAGGAGTAGCATCAGTAGGCAGCAGGAAAAAGCAGAGAGGACCATCACGGGAACAACGACAGATGCGGGAAACAATGCGACCTAAG
HD3A1004	B07	HD3101348	probe	FBgn0005198	gigas	gig	201	ATCATGAAGAACCTCTTGGGC	GAAGGCTGTCAGCACATTCG	ATCATGAAGAACCTCTTGGGCACCCAGTTGGGATACCATTCCATGAAGATGATGTGCAGTATCCTCAACGATCGAGCTCTTTACGATGATGCCCACCTGTTGCGTGGGGCCGTGTTCCATCTAAACATGAACATCTTTGGCTCGAACATTATTTTCCAGGTTTCGCCTATGACCTATGCAACGAATGTGCTGACAGCCTTC
HD3A1004	B08	HD3101444	probe	FBgn0035150	Rev1	Rev1	214	ATCCAGAACCAAATGCTTACG	TGGCTCGAATTAATGGATGG	ATCCAGAACCAAATGCTTACGATTGAGGGTTACAGTCTGTTATTCATTGAGTACATTCGTTGCATAAAGTGCTCCTAAGACCCTGGACATTTAGAACGGATATTGGGTGTCATTGAGAATAGTTATTATAATAATGTAACGCCAAGCTATGAATGCGGCCAGCTGATAATGTTAATGAGCCATTAGTTTATAAGCCATCCATTAATTCGAGCCA
HD3A1004	B09	HD3101349	control_th	FBgn0260635	thread	th	173	CGGTGAAGGTCTTTAATCGC	ACAACCAGAACACAAAATGGC	CGGTGAAGGTCTTTAATCGCGTCTCCTCGCGGTTTAAATCGTTCATTCTGGTTTTGTTTATATTATTTTTGAATAGCTGGGTCGCGTTCGTGTTGTTATCCACCTGATCAAAAGCGATAGGTCCATAAGACGGAAGATCAGCTACAACAGATGCCATTTTGTGTTCTGGTTGT
HD3A1004	B10	HD3101445	control_rh3	FBgn0003249	Rhodopsin 3	Rh3	171	GTCTTCTCCGCAGCCAAAT	GGAGCCAATGATTCCAAAGA	GTCTTCTCCGCAGCCAAATCGCTGCGAACTCCCTCCAATATACTGGTCATCAATCTGGCCTTCTGCGACTTCATGATGATGGTCAAGACTCCGATATTCATCTACAATAGCTTCCACCAGGGATATGCGCTGGGTCATCTGGGATGCCAGATCTTTGGAATCATTGGCTCC
HD3A1004	B11	HD3101350	probe	FBgn0027889	ballchen	ball	201	CGTACTCCCAATGCCAAGAT	CTTATCCTGGTCCGCTTTCTT	CGTACTCCCAATGCCAAGATCAATTTCAGCCCGTCTATTTCGCTGCGTGGACGTCCCGGTGGCAAAACCGTGATCAACGATGACCTCACTCCACAGCCGCGTTCCAAGAAGACCTATGAGTTTAACTTCGAGCTCGACGTTAGCATGGATGCCAACGTAATTGTGAATGTCAAACGCAAAAAGAAAGCGGACCAGGATAAG
HD3A1004	B12	HD3101446	probe	FBgn0261283	Helix loop helix protein 106	HLH106	208	GGAAGTCCAGGGCAAGGTA	TTGCAGATCCCGAATCTTGT	GGAAGTCCAGGGCAAGGTACCTATCAACCGGGTTCAACCCAAGGTGAAGGAAGTAAAGCGCTCGGCCCACAACGCCATCGAGCGGCGCTATCGCACCTCAATCAACGACAAGATTAACGAGTTGAAGAACTTGGTAGTGGGAGAGCAGGCCAAGCTGAACAAGTCCGCAGTGTTGCGGAAATCCATAGACAAGATTCGGGATCTGCAA
HD3A1004	B13	HD3101351	probe	FBgn0028434	Ercc1	Ercc1	207	CACTGCGTCCTTGTTCACAG	CAGCTCATACATCTTGCCCA	CACTGCGTCCTTGTTCACAGCAAACAGCGCGGTAACCCCATCCTGAAATCCATACTTAATGTCCCGCTGGAATTCCGCGACGACATCGTGCCCGATTATGTGGTCGGTCGAACATCCTGCGTGCTGTACCTCTCGCTAAAGTACCATAATCTCAATCCCGACTACATTTGCCAGCGTTTGAAGGCTCTGGGCAAGATGTATGAGCTG
HD3A1004	B14	HD3101447	probe	FBgn0003118	pointed	pnt	224	AGGAGCTGGTGGCCAAGTAT	TTAATCTCGTTGCAAGATCGC	AGGAGCTGGTGGCCAAGTATGATCTTAAGATTGAGAAAAAAGATGTGGATTAGCAGCGGAGCAGCGGAGAAGCTGCCTAAAACGGGAACAGCTCCAGGAGATCTGCGCCCAGCCACGGATTGTACTCAACCAACCGCAAAATACTTTCGAGCGTTATTGTTTACCAAGCGTGATGTTAGCTTTTAAGCAGCTACCCCCGATCTGCGATCTTGCAACGAGATTAA
HD3A1004	B15	HD3101352	probe	FBgn0037554	DNApol-iota	DNApol-iota	216	GCCCAGGATAAACTCCTCAA	TGTGGGACTTGTGAGACTCG	GCCCAGGATAAACTCCTCAAGATTGTGATGCGACTTTTTGAGCGAATTGTTGATATGAGCAAGCCCTTCAACATCACTCTACTAGGCCTCGCATTCTCCAAGTTCCAGGAGCGCAAGGTTGGCTCCTCATCAATTGCTAATTTCCTGATCAAAAAGGCGGATCTGGAGGTGCAGTCTATCACCTCACTGACAAATACGAGTCTCACAAGTCCCACA
HD3A1004	B16	HD3101448	probe	FBgn0011826	Protein phosphatase 2B at 14D	Pp2B-14D	211	GAAATATCGAGGCGCAGTG	TCAATGTTTAATTCGTATAAGGAACA	GAAATATCGAGGCGCAGTGCCGAGATGCAACCGAAAGTGTAATGAAATTTGAAATGAGCAAAGGTCATTTTTTGTAATAATCGTAATCCTTGAACTCTAGAAATGTAATCTTGCATAGAAGAAACGAATGAAACAAGCAAACAAATTCGAAACCATTTGCAATATGTGCCGCAATAGTCCATAAATGTTCCTTATACGAATTAAACATTGA
HD3A1004	B17	HD3101353	probe	FBgn0003891	tudor	tud	201	AATCCAAAAGCGAAACGAGA	GCATCCTCTTGGGAGTAGCA	AATCCAAAAGCGAAACGAGAACTCTGAATGCATTATCTCATATGGAAACTCACCCAAGAGTTTTTATGTGCAAATGAAGCACAATTCAGCGGATTTGGACTTGATTGTGAAGACACTGCAGTCCTTAAAAAAGGAGAAACTGAAGAAATTAATCGATCCTACTACAAATTCAAATGGTGTTTGCTACTCCCAAGAGGATGC
HD3A1004	B18	HD3101449	probe	FBgn0005694	Adult enhancer factor 1	Aef1	201	CACCCCATCTCACATTCACA	AATCTGAAACGGGTTGCACT	CACCCCATCTCACATTCACAACCCTCTCAGCCCCGGAAATAGATTAAACCCCTCTCTACTCACTTATAAAATAACCTAACCCTAACTAGAGTGAAAATAGTTTGCTAATAGCAAGAGCAAACTAAACCCAAAAGGCAAAAAGCATTACGTGTACGAAGAACTTAATTAAAATATTTCCCAAAGTGCAACCCGTTTCAGATT
HD3A1004	B19	HD3101354	probe	FBgn0030789	Rrp45	Rrp45	219	TTCGTTGCAAGTCTCTGTTGA	GCGTCTCACTGCTCTCGTTA	TTCGTTGCAAGTCTCTGTTGAATTTCGTACGCAAAGCTTTGGCGCTGGACGAAGAGTGTCGATCGCAGGGCGATCAATCGGTCGATGGGCTGGTGGCACTGATTTTAAATACGGAGCACAAGTTGAGCTACAACAAACTGATGGGCAGACAGAAACAGGAGCAGCAACCTCCGCCAAGCGAGAAAATGCAGTTGGATAATAACGAGAGCAGTGAGACGC
HD3A1004	B20	HD3101450	probe	FBgn0011737	wee	wee	201	CTCTTCCGAATCGAACGTGA	CAAGGGGCTTTTCTTAAAACG	CTCTTCCGAATCGAACGTGAACTAAGCTCACATTGTGTTACCTTTTAAGCGTATTCATATAATCGATACATATTTCTAACTATTCGCTTTCGTTTAAGCTCATGGATTTTGAAGCATTCGTAAATATAATCTATATATTTTTCAAGCTCAGTGAACTTTTCCCTGTTAAGAAAGCACAATCGTTTTAAGAAAAGCCCCTTG
HD3A1004	B21	HD3101355	probe	FBgn0024238	Fimbrin	Fim	201	GCCGATGGTCTGGTCATTT	GGCATTGCCATCGTTTAGAT	GCCGATGGTCTGGTCATTTTCCAGCTGTTCGACGTCATCAAGCCGGGTATTGTCAACTGGAGCCGTGTGCACAAGCGTTTCAGCCCGCTGCGCAAGTTCATGGAAAAGCTGGAGAACTGCAACTATGCGGTGGATCTGGGCAAGCAGCTCAAATTCTCGCTGGTCGGAATCGCAGGCCAGGATCTAAACGATGGCAATGCC
HD3A1004	B22	HD3101451	probe	FBgn0052438	Smc5	Smc5	218	GCAGCTATCAAGGACTGCAA	TTTGTCGGTTTTGGATAACACA	GCAGCTATCAAGGACTGCAAAATGAAGTCAAGCAACTGGAGGAAGGAATTCAAGAGTCTGTTAACCAAGCAAAGAGCATCGAGTCTGGCATGTCCAATTTATACGACAAATGGGAGCCCAAACTTAATAGCTTGGTAGAAACAATCAGTACCAAGTTCAGCGAATTTATGGAGTCCATTGAATACGTGGGAGAAGTTGTGTTATCCAAAACCGACAAA
HD3A1004	B23	HD3101356	probe	FBgn0053526	PNUTS	PNUTS	203	AGTTCCGGACTCTGCCTCTT	CCTTTTCCAGATGTTCCACC	AGTTCCGGACTCTGCCTCTTCTTCAGACAGCACTGATAGCGCCGGAGCACCTGTGACGTATACCATCACCTCGGCGGCCAACAGTAGCAATTCCAACAGCATTACCATCAAGTGGAAGCCTTTGTTGGACAACCCAGATGGTGGCGACGAAACGGATTCTGGCACACAATCGAAAGACAACGAGGTGGAACATCTGGAAAAGG
HD3A1004	B24	HD3101452	probe	FBgn0000150	abnormal wing discs	awd	202	TTTTGCAACGGCGAACAC	AGGTGAACTTCAGGGCGAC	TTTTGCAACGGCGAACACATGAAGCTCCTGATGCTCGGCACAATTTTGGCATTCTTTTCTGTAATCTCGGCGACAATGGCGGCTAACAAGGAGAGGACTTTCATCATGGTCAAGCCCGATGGCGTCCAGCGCGGGCTCGTCGGCAAGATCATCGAGCGCTTCGAGCAGAAGGGCTTCAAGCTGGTCGCCCTGAAGTTCACCT
HD3A1004	C01	HD3101165	probe	FBgn0034051	Myelodysplasia/myeloid leukemia factor	Mlf	212	CAACCACATGAACCACACTATG	ACAGGCGATTAAAGTTTGGC	CAACCACATGAACCACACTATGAACGCGATGAACATGCAGATGCGCTCGATGAATCGCCTGATGAACAGCTTTATGCCCGATCCCTTCATGCAGGTCTCGCCCTTTGACCAGGGATTCCAGCAGAACGCTCTCATGGAGCGTCCGCAGATGCCGGCCATGCCAGCCATGGGCCTCTTCGGCATGCCCATGATGCCAAACTTTAATCGCCTGT
HD3A1004	C02	HD3101261	empty
HD3A1004	C03	HD3101166	probe	FBgn0001276	intersex	ix	210	GCAGCAGAACTCCTCCAATC	TAATGCTACTACAACTATCAATCAGCC	GCAGCAGAACTCCTCCAATCACTATCTCCCCGGTCCGGTGACTCCCATGCGCATGGAGACCTTTATGCCGGACAACGCCGGCCCCATTTCGTATCCCACTTACTTGAACACGGTCCGCGTTCACATACAGTCCGCCAAGGATATACACGACACTCTGATTAGTGCCGCGCAGAACATTTCGCAGGCTGATTGATAGTTGTAGTAGCATTA
HD3A1004	C04	HD3101262	probe	FBgn0020633	Minichromosome maintenance 7	Mcm7	209	GTTTCGATCTGCTGTGGCTC	TCCCACAATGTAGTCGGTGA	GTTTCGATCTGCTGTGGCTCATCCAGGATAAACCGGATCGCGATAATGATTTGCGCTTGGCCAAGCACATAACCTATGTGCATAGCCACAGCAAACAGCCACCCACTCGAGTAAAGGCTCTGGACATGAATCTTATGCGGCGCTACATTAACCTGTGCAAGCGCAAGAATCCAACTATTCCGGATGAGCTCACCGACTACATTGTGGGA
HD3A1004	C05	HD3101167	control_rh3	FBgn0003249	Rhodopsin 3	Rh3	171	GTCTTCTCCGCAGCCAAAT	GGAGCCAATGATTCCAAAGA	GTCTTCTCCGCAGCCAAATCGCTGCGAACTCCCTCCAATATACTGGTCATCAATCTGGCCTTCTGCGACTTCATGATGATGGTCAAGACTCCGATATTCATCTACAATAGCTTCCACCAGGGATATGCGCTGGGTCATCTGGGATGCCAGATCTTTGGAATCATTGGCTCC
HD3A1004	C06	HD3101263	control_rh3	FBgn0003249	Rhodopsin 3	Rh3	171	GTCTTCTCCGCAGCCAAAT	GGAGCCAATGATTCCAAAGA	GTCTTCTCCGCAGCCAAATCGCTGCGAACTCCCTCCAATATACTGGTCATCAATCTGGCCTTCTGCGACTTCATGATGATGGTCAAGACTCCGATATTCATCTACAATAGCTTCCACCAGGGATATGCGCTGGGTCATCTGGGATGCCAGATCTTTGGAATCATTGGCTCC
HD3A1004	C07	HD3101168	probe	FBgn0086370	sarah	sra	213	CGCATACTTATCGGGTTTTAGTTT	AGTAATTTGCAAGTGCACCG	CGCATACTTATCGGGTTTTAGTTTAATCGATGTTTCCAGAAGCACCAAAATTCGCCGTTTCTCAGCTCTAGTCCGAAAACAAAATTCGCTGTGAGCGGTTGTGTCGTCGAACGTGAAACTACGCGTCTCCGCGAATGACGCAGACTGGAAGCTTCCACTGGCATGACAATCGTCTAAAAACATTCAACAATAGCGGTGCACTTGCAAATTACT
HD3A1004	C08	HD3101264	probe	FBgn0030170		CG2990	209	CCAGCTCTTCTTTGGCTCAT	CAGTTGTGGAACCCAGAGGT	CCAGCTCTTCTTTGGCTCATTTACTCTATGCCAGCAATCTCATCCAGGTGGAAATGGAGGATCATCTGATGAAATTCATTGATCCCATTGTCAGTTTTGTGGCCCAATATGTGAAGGGTGAACCGCCAAGTGTTTTGCTGCCCGAAGTCTATAGAGGTCAAATCCACGAGATATGCGATATAGAGGAGAACCTCTGGGTTCCACAACTG
HD3A1004	C09	HD3101169	probe	FBgn0030646		CG9203	222	GGCTACAGTCTTGGTGGCTC	CGTATGAACATCCCTGACCA	GGCTACAGTCTTGGTGGCTCTAGCGCTATAGAACACATAGATCTTAGTGACACTGATGTTCCCGATTCCGCTAAACTTCGTCAAATTCGACTTCAGCGTTTTAGCGAAGATGCTTCCAACAAGCGACAGAATAAGAAAAAGAGGCGTCGTGTTTCCAGCGACAGCGAGATAATCAACTGGGAGTCCTACGATGATGACGTAATGGTCAGGGATGTTCATACG
HD3A1004	C10	HD3101265	probe	FBgn0262975	cap-n-collar	cnc	224	TGGAGGAAGAGCATCTGACA	CAGGATCTGGTCCAATTTGC	TGGAGGAAGAGCATCTGACACGCGATGAAAAGCGCGCTCGATCCCTGAACATACCCATTTCAGTGCCGGACATCATTAACCTGCCCATGGACGAGTTCAACGAGCGCTTGTCGAAGTACGACCTTAGCGAGAACCAGTTGTCGCTGATTCGCGACATTCGTCGGCGTGGAAAGAACAAGGTCGCTGCCCAGAATTGCAGGAAACGCAAATTGGACCAGATCCTG
HD3A1004	C11	HD3101170	probe	FBgn0037279		CG1129	223	CCAGCTCAGAGCCATTTTTC	CCGGCATTGATCTTATTGCT	CCAGCTCAGAGCCATTTTTCGTGCTCAATTCGGACGTTATATGCGATTTTCCATTTAAACAACTAGTGCAATTCCATTGTAATCACGGAAAAGAAGGCACAATTGTTGTCACAAAGGTCGAAGAACCATCCAAATACGGAGTTGTGCTGTACGATGAGAACGGCTGTATAAAAAACTTTATTGAAAAGCCACAAGAGTTCGTTAGCAATAAGATCAATGCCGG
HD3A1004	C12	HD3101266	probe	FBgn0003567	suppressor of Hairy wing	su(Hw)	206	AGCCGTGGAAACTACCAAGA	TCTCCTGGCCGTTGTTATTT	AGCCGTGGAAACTACCAAGATCAAGACGTCTCCCAGTAAAAGAAAGAAAATGGAGCACTATGTACTTCAGGCTGTGAAATCAGAAAATACCAAGGCGGACACCACGGTTACCGTGGTCACCGAAGAAGATGACACCATTGATTTCATTCTAGCGGATGATGAGGAAGTAGTTCCGGGCAGAATAGAAAATAACAACGGCCAGGAGA
HD3A1004	C13	HD3101171	probe	FBgn0002787	Regulatory particle non-ATPase 8	Rpn8	204	AATTCAGAAAGCGAGGCGT	GTGCTTTTTCTGGGTTTTCG	AATTCAGAAAGCGAGGCGTCGGCCACACTGTAAATCGTTTCTGCTTGTCATTTTGGCCTGAGTTTTTTGCCGCAAATTGCAGGTAATTTAGCGAAAAACAGGAGTCGCAGGAAGCCAAACCCGTCGAAAACAAATCAGTCCGGTACCTATCAATCGGCGCAGAGGTCATAGTAAGCCCCCGAACCGAAAACCCAGAAAAAGCAC
HD3A1004	C14	HD3101267	probe	FBgn0263604	lethal (3) 72Dh	l(3)72Dh	202	GAATGCCTTCTATCGCATCA	TTCATTGGTTTCGGGTCTTC	GAATGCCTTCTATCGCATCAACACACCCATTAAATCTCCGATGTTTGAGAAGAAGTCGGAGATCTTTGGTCGGAAGTATTTGTTATCATAAATTTGTTAAAACCTGTAGCCATTAAGTAATTGTGTAATATAAAACTTGAAATAATTTAAAAGCATAACTTTACCCTTTCTTATACAGTTGAGAAGACCCGAAACCAATGAA
HD3A1004	C15	HD3101172	probe	FBgn0039056	Centaurin beta 1A	CenB1A	225	GCCGCAAGAGTTAGGACCTT	ATTCGAATGCCAAATGCAA	GCCGCAAGAGTTAGGACCTTACTGGATATTATGGAATAATTTGTTCCAATTATTAGGATAGCGTGATATTGGATTGTTATTGGCTTTATAACGCATTAACCAGGAATGTTAAACGGTTTCGACCTCTAAGGATGTCGTTGCGGGCTTGTTTCCCTTGGTAATCTCATTTGAAAAGCGCTTCCGATTATACAAGAAAATATTATTCATTGCATTTGGCATTCGAAT
HD3A1004	C16	HD3101268	probe	FBgn0025800	Smad on X	Smox	202	CACACTGCAACTTTGCGAATA	CACAAACACACAGAGGCACA	CACACTGCAACTTTGCGAATAGCAAAATCGCGAAACGCAAAAAATTATATTACTCCCATAAAGCACAATTCGAACGTAAAGTGAACTACTAACGTATAGAAAATAAACACAAAGAGCATAACATAAGAACAAACAACAAGGAGGCGTTTAAATATTTATCAAAATAAGTTCTCTGTTCTTGTTGTGCCTCTGTGTGTTTGTG
HD3A1004	C17	HD3101173	probe	FBgn0036640	nuclear RNA export factor 2	nxf2	216	TGGGTGCCTTTCTTGAAAAC	CATCGCTTGCCTTGGAATAG	TGGGTGCCTTTCTTGAAAACTATCTCCGGGAGTTCGAAAACGATGAGTTTCGCCACAATCTGTACAAGTATTACTCTGAAAACTCGATTTTTACTCTAACGTGCAACTACAACGTGGTTCAAAATCACCAGACTCCAAAGATATTGCAGCGTTTATCAAAGTACAACAGGCATGCACGAAATCTGCGCAACAAGGACTATTCCAAGGCAAGCGATG
HD3A1004	C18	HD3101269	probe	FBgn0004583	expanded	ex	217	TCGTGGAAGTGGAAGAGGTC	TCGGCATTGTTAATGCTGTATC	TCGTGGAAGTGGAAGAGGTCAGAAAGTAACAACAACGAAACGAAAATTTTACTGTTAGGCACTTATCGATAGCCAAATCAATAGATCGGTTTTAAGAGTGCACGAAGAGTGAGCTTTAGTTAAACAAAACTACCAAACCAAAATTAAAAAGCCAGTTATTGTGGATTACGCGAAACCGAAACAGAAGCAGATACAGATACAGCATTAACAATGCCGA
HD3A1004	C19	HD3101174	probe	FBgn0041147	imaginal discs arrested	ida	202	AAGCTCATTCAGGAGCAGGA	GGCTAATGCCGTAGTTTTCG	AAGCTCATTCAGGAGCAGGACAAGAGTTACAATGAGCTACATAGTTTGTTGACCACGGGGAAATACAAACTGGATACTCTGATGCTGGAATCCTTCGAAAAAGCCATGTCCGAGTTTTGTGCGGGCAGCATTGAGGCTTTGTTTGACTTCTCGGAGATCCAGAACATCGACGAGATCCTAAACGAAAACTACGGCATTAGCC
HD3A1004	C20	HD3101270	probe	FBgn0026876		CG11403	203	GCGAGCAAAAGCTGAAAGAG	CACCAAAATTCTGCCATCCT	GCGAGCAAAAGCTGAAAGAGAAAACCAAGTCGGTCAAAAGAAGAGTGGAAGACATCAATAAGGAAGATAAAGCGGAGGAGTTGCAAGAACAGCAGAAGCCAACGAAGAAGCCGGTCGAGGAAGTAGCTCCTTCGCCAATCAGACCATTGCTGGCATTTCTGGAAACCCTCACCAGCAATGCTGAGGATGGCAGAATTTTGGTG
HD3A1004	C21	HD3101175	probe	FBgn0013799	Deformed epidermal autoregulatory factor-1	Deaf1	217	CGTCTCGGTAGACGTCGAAT	CTCTTCTTTCACAACATCCTCG	CGTCTCGGTAGACGTCGAATAATATACATATATCGCAATAATCCAATTGCAAGTGGTAATCCGATGAACAATTCAAGTGCATTACTATCGTTGGACCGCAGAATAAGTGAAAGTGAACTGGCATAACAATACTATGGAACAGGTTGACTCCTCCACCGAGCTGCACCTGAATAGGAAAGATCTGGCCGCGCTGGCCGAGGATGTTGTGAAAGAAGAG
HD3A1004	C22	HD3101271	probe	FBgn0001332	Lobe	L	208	CAGGCAAACAACCTCCTGAT	TCCTTTAAATCACTTTCCCGC	CAGGCAAACAACCTCCTGATATCGGAGACAGTCGACAAAAAAATTGAACGGTTGTGGGTGTATGCTATGTTCGATTGTTTTCGGTCACCAGAAGAAAACTCGTAAAATCTCGGAATACCCGCAAATGCCCGTCGACTTCTGACTCGAGGGGTTCTTGAATTGCACTCGAAGTATCGAACAACATTGAGCGGGAAAGTGATTTAAAGGA
HD3A1004	C23	HD3101176	probe	FBgn0036134	forkhead domain 68A	fd68A	201	CTGTTCCAGACTCCCTCCAC	ATTATGACGTATGGAATTCTGCC	CTGTTCCAGACTCCCTCCACAGCCAGCTACAATCACAACGAGAAGCCGCCGTATAGCTATGCCCAGCTCATCGTTCAGGCCATATCTGCCGCACCGGACAAGCAGCTAACGCTCTCGGGCATTTATTCGTTTATAGTCAAGCATTACCCGTATTACCGCAAGGAGACGAACAAGGGCTGGCAGAATTCCATACGTCATAAT
HD3A1004	C24	HD3101272	probe	FBgn0004373	four wheel drive	fwd	217	GCTCTGGAACCGTACAGAATC	CTTGGCAATTTCTATGCGCT	GCTCTGGAACCGTACAGAATCTCCGAAAACGCTTTCATATGAATTTAACCGAACAAGAAATGGAGCGAAAGGTTGAGCAGCTTGTACAGGACTCGTTAAAAAGTCTGTCAACCAAACTGTACGACGGTTATCAATACTACACTAATGGCATATTGTGAGAACGGTTTTTTATGAAGATCTAAATGGGTAATCATAATAGCGCATAGAAATTGCCAAG
HD3A1004	D01	HD3101357	probe	FBgn0034520	lateral muscles scarcer	lms	217	GCGTCGCTATCCACACAGT	GTTTCCATCATCTGAGGCCA	GCGTCGCTATCCACACAGTTTTTCCATCGAACAAATTCTGGCCAAGCCGGAAATGCGCAGCTCCACTTCCTTTGAGGACTCCGTGCAGGATGAAAGCGGTCGCGGTGGCAATTGTCTCGGTGCTTCACGGGCTTCCAGTCCGGCAACATCGAGTTGCTTGGATGACAACATGGACGACGGCAAAAGTGATATCGATTTGGCCTCAGATGATGGAAAC
HD3A1004	D02	HD3101453	empty
HD3A1004	D03	HD3101358	probe	FBgn0037263	nuclease slx1	slx1	212	CGTCGCTTTCAACTAGGCTT	CTTGCCACTCACAATTTCCA	CGTCGCTTTCAACTAGGCTTAAAATGTACCCTGAATTAAAACGAAAACTGCCCAGGGAGACGTTCTTTGACTACAACTTTAGGATCCTTAGTAATATGCTGGGGGTTGGCCCTTGGAATAGATTACCGCTCACCGTTCGCTGGCTAGAAACGGATTACGAGAGGCCATTCAGCAAGGCACTGCCTAAACACATGGAAATTGTGAGTGGCAAG
HD3A1004	D04	HD3101454	probe	FBgn0003479	spindle A	spn-A	221	CTGAATGAATCCGAGGTGCT	TGAAGCATGCGCAGAAATAA	CTGAATGAATCCGAGGTGCTGGACAATGTGGCCTTCACCCGTGCCCACAACTCAGATCAGCAGACCAAGCTCATCCAGATGGCGGCGGGCATGCTCTTTGAGTCCAGATACGCTTTGCTGATTGTGGACAGTGCCATGGCGCTCTACAGATCCGATTATATTGGTCGCGGGGAGCTGGCCGCCAGGCAAAACCATTTGGGCTTATTTCTGCGCATGCTTCA
HD3A1004	D05	HD3101359	control_rh3	FBgn0003249	Rhodopsin 3	Rh3	171	GTCTTCTCCGCAGCCAAAT	GGAGCCAATGATTCCAAAGA	GTCTTCTCCGCAGCCAAATCGCTGCGAACTCCCTCCAATATACTGGTCATCAATCTGGCCTTCTGCGACTTCATGATGATGGTCAAGACTCCGATATTCATCTACAATAGCTTCCACCAGGGATATGCGCTGGGTCATCTGGGATGCCAGATCTTTGGAATCATTGGCTCC
HD3A1004	D06	HD3101455	control_rh3	FBgn0003249	Rhodopsin 3	Rh3	171	GTCTTCTCCGCAGCCAAAT	GGAGCCAATGATTCCAAAGA	GTCTTCTCCGCAGCCAAATCGCTGCGAACTCCCTCCAATATACTGGTCATCAATCTGGCCTTCTGCGACTTCATGATGATGGTCAAGACTCCGATATTCATCTACAATAGCTTCCACCAGGGATATGCGCTGGGTCATCTGGGATGCCAGATCTTTGGAATCATTGGCTCC
HD3A1004	D07	HD3101360	probe	FBgn0266450	Kruppel homolog 1	Kr-h1	213	TTCAGCCACAACCAAAATGG	TGTAGCTGCAGTTGCATTTGT	TTCAGCCACAACCAAAATGGTTTACTATTCCGCCAACCAGCTGCTTATAAAAACGGAACAATCTAGTCAGGCGCAGTTCTGCCTCCAGGTTCCGCCTCCACTAACAGCGACGACCACGAGCGTGGGCCTAGGAGTTCCGCCATCCGGCGGCCAACAGGAGCACTTCGAGCTGCTGCAGACGCCGCAGCAGCGACAAATGCAACTGCAGCTACA
HD3A1004	D08	HD3101456	probe	FBgn0033948		CG12863	203	CTGCGCAGCCTTAGAAAACT	GGTGATCCACAAAACCGACT	CTGCGCAGCCTTAGAAAACTGCATAATCAAATCAACCGATTGCCATCCACTCCACTGTCCATATTCTGGATATATCCCTATTATTCAGCTAACCACATCAGGCAGGAAATGCCTGAGCTTGAAATGTGTGAATACAGGATCAATTACACTAATCACCTTAGATATACGAATGTGGGCAAGCAGAGTCGGTTTTGTGGATCACC
HD3A1004	D09	HD3101361	probe	FBgn0016685	Nucleoplasmin	Nlp	216	CCGATGGTAAAAATGCCAAG	GAAACACGACCGAGCACAC	CCGATGGTAAAAATGCCAAGAACAACAAGAAGAAGTAAACTGCTGACCGCCAATCATCCATCGAGGTTTAAGCTATGAACGTGTAGATTTTAAAGCAAAAACAGTTTTAGGCCCTATAATACAATACGATGCATACTGAGAATACAATCTAGTTCCTTTTGAACAGCTCCTTTTACATTCAATTCAAAGACAACGTTGTGTGCTCGGTCGTGTTTC
HD3A1004	D10	HD3101457	probe	FBgn0035997	pleiohomeotic like	phol	207	GCCGCGGTATTTACAGCTAA	GTGTGTGTGTAGTGTGCAGCG	GCCGCGGTATTTACAGCTAATAAATGGTTTGCCAGTTGGAGGTTAATAAAATGCAATTTTTGAATAGTAGTTAAGATTACATTTGTGCTGTTTTGCGAAGTAATGCGAAGAGAATAACCAATCTCCGCTGAATAAACCGCTTAAGATATACACAAAGCGCGCGCAGGGTTGCATTGTGGCGCCTGTCGCTGCACACTACACACACAC
HD3A1004	D11	HD3101362	probe	FBgn0005355	Suppressor of fused	Su(fu)	214	GGTGGTGGTTTAAAGCTATATGGA	GGAATACCACCGCTTGAATA	GGTGGTGGTTTAAAGCTATATGGATATATATTTTCACTGTTTTTCTCTACATTTTAAAAATAAGCAGAAAAAAGTAAGAAAGTAATAATTATTATAAAAAAGGTTTTAAAAATAAATAATGGTTTTAAAAGAAACTCATGTAAGTTTCCATTGTCAAATCCGCACTTTACATGGCAGTATTTTTATTCATGGTATATTCAAGCGGTGGTATTCC
HD3A1004	D12	HD3101458	probe	FBgn0010501	Death caspase-1	Dcp-1	211	CGAACAAAAGGCAAGAGGAA	CAACAACAAGAGACTCCGGC	CGAACAAAAGGCAAGAGGAAACACAAGGAGAAACGCAAACAATCAAAACAAGAACTTAAGCAAGAAAAGGGGCGCAAGATGACCGACGAGTGCGTAACCAGAAACTACGGAGTAGGCATTCGCAGCCCAAATGGATCGGAAAATCGGGGCAGCTTTATAATGGCTGATAATACCGATGCCAAGGGCTGTACGCCGGAGTCTCTTGTTGTTG
HD3A1004	D13	HD3101363	probe	FBgn0037717		CG8301	223	TTCCGTAGGGCATAAACCAT	GCGAAGCTTAGATTGCTCGT	TTCCGTAGGGCATAAACCATATAGCTATATCTCTGTCCATTTCTTCGATCGGTCCCTAAGGCACTCCAGCCGCATATCTCTTTCTAACTCTGAGCCATATTAATCTCACAGAACGCCTTTAAACACTACCAGCACATACATACATATATCCATTTGACCACTTAGCGATAAGAAATAAGCAATGAGAACATACAAGATGTTATACGAGCAATCTAAGCTTCGC
HD3A1004	D14	HD3101459	probe	FBgn0019949	Cyclin-dependent kinase 9	Cdk9	206	AGCACGAGAACGTGGTGAAT	GCTGTGGATGTAATACAAACCG	AGCACGAGAACGTGGTGAATCTGATCGAGATCTGCCGCACCAAGGCCACCGCCACGAATGGTTACAGATCCACCTTCTATTTGGTCTTTGATTTCTGCGAACACGATTTGGCAGGTCTTCTGTCCAACATGAACGTCAAGTTCAGTCTGGGCGAGATTAAGAAGGTTATGCAGCAGCTTTTAAACGGTTTGTATTACATCCACAGC
HD3A1004	D15	HD3101364	probe	FBgn0052133		ptip	209	ACAGCAAGGTGGTCCTCAAG	GCTGCATTAGTTGCATTTGG	ACAGCAAGGTGGTCCTCAAGCACCTACTCCTGCACCACACCCGCAGCATCAACAACAATTAATAATTCAGCAGCAGAAGATTATCCCCGCCAACCTGCAGCAGCAACCACAAAACCAGCAGCAAATCAAAAATATCCTACAGCAGAGACAAATGAAAACAACGCAGCAGTCTCAGCAACAGCAACAAATCCAAATGCAACTAATGCAGC
HD3A1004	D16	HD3101460	probe	FBgn0029134	Proteasome beta5 subunit	Prosbeta5	113	GCCTACTCCGGTGGTATCAT	TGCTTCAACTGCTCCTGGTA	GCCTACTCCGGTGGTATCATTCGCGTGTATCACATTAAGGAGGACGGCTGGGTAAACATCTCCAACACCGACTGCATGGAGCTGCACTACATGTACCAGGAGCAGTTGAAGCA
HD3A1004	D17	HD3101365	probe	FBgn0038546		CG7379	215	CACATACACGCACACACGAG	GGATGCAATGGGGTTTATCA	CACATACACGCACACACGAGTACAGTCGCAAGTTGCGACTCGCAACGCCATACAAAAAGTTGGAACTGAGTGGAATCGGAGTACTATATAGCCAGCCGATCCCTTCCAGAGCGCCGGAAGAGTAGCTCACATCCGAACCCACGTCCCCGAGCCGATGTCGCGGCGGGAATAGAGCGATTCGCAGTCCAAACACGATGATAAACCCCATTGCATCC
HD3A1004	D18	HD3101461	probe	FBgn0003885	alpha-Tubulin at 84D	alphaTub84D	201	ACCGGCGGTCACACTTAAT	CGCTTTTTGGTTTGTTTGTTT	ACCGGCGGTCACACTTAATCTACTGAACAAGCGTGCTTGTGCTAAATAATTTTACTGATCTTTAAATCTCGTAAATACCGCCATTTAGCCGCATCTGAACACTCTTGCCGATGGTAATCAATTATTGGCCAAGAGCTAGCAATGTTGTGTAAAAATCAGCGTGAAACTAAAGCCGAATTCAAACAAACAAACCAAAAAGCG
HD3A1004	D19	HD3101366	probe	FBgn0086444	lethal (2) 37Cb	l(2)37Cb	201	GCCACCGCTGGTTACTTTTA	CAACCACTTGCTCTCGATCTC	GCCACCGCTGGTTACTTTTACCATGTGGCGCGACTCTCGAAGGGCGGTCACTACAAGACCATCAAGCACAATCAGACCGTGATGATACATCCGAACTCCTCGCTCTTTGAGGAGCTGCCGCGCTGGGTGCTCTATCACGAGCTGGTGTTCACCTCCAAGGAGTACATGCGTCAGGTTATAGAGATCGAGAGCAAGTGGTTG
HD3A1004	D20	HD3101462	probe	FBgn0261641		CG42724	202	CCTTAGTAGCGGACTGGCAA	TCTCCTCTAAGCTCGCATCC	CCTTAGTAGCGGACTGGCAACGACATTCATGTGCTGCCACATAGCCTTTCTTATTCGATAATTCGATAAGTCGAGTAAACTGGATTGTATTCACATCTCTAGCGGCAGAAAAGTGTAGAAAATTTTCAGGGGTTTTTAAAACGAAAAGTAAGAGGTTGCGTACAGTTAGATTTGTGTGCCATGGATGCGAGCTTAGAGGAGA
HD3A1004	D21	HD3101367	probe	FBgn0020622	Pi3K21B	Pi3K21B	209	CAAGTGGCATGGCAACAAC	CGCTTTTGATTCTTATTTTCGTG	CAAGTGGCATGGCAACAACAGCGCTGTTCAACACCGCACGATTTCTACCCGAAAATAATGGTGTGCTGATATATTGTGATTAAACCCCAATTTCTGTCGTCCAAAAGCTCCGCACGGGAATGTTTTGATCCAGCTACAACTGAAACAATTGCACGCCAATTAAAAGAACCAATGAGTGGGTAAAACCACGAAAATAAGAATCAAAAGCG
HD3A1004	D22	HD3101463	probe	FBgn0002526	Laminin A	LanA	203	CCTGCAACTGTCATGGTCAC	GACATCGGTCTCGTTCCAGT	CCTGCAACTGTCATGGTCACAGCAACGAGTGCAAGTACGATGAGGAAGTGAACCGCAAGGGACTGTCCCTGGACATTCACGGACACTACGATGGTGGTGGTGTTTGCCAGAACTGTCAGCACAATACCGTGGGAATTAACTGCAACAAGTGCAAGCCGAAATACTATAGACCCAAGGGCAAGCACTGGAACGAGACCGATGTC
HD3A1004	D23	HD3101368	probe	FBgn0262160		CG9932	202	GTCTACGTCGCCTCATCCAC	GTGGAGCATGATTTTGGTCA	GTCTACGTCGCCTCATCCACCAACAATACCACAACACCACCACCACCTCCCACCAACTCAGTCAGCAAGCCCAATGCATCGCCTTTGCCAGTAACTACCACTCCTACTCCTATTTCTACTGCCACACCGCTGGCTCATCCATTGGGTGCGGGTAACCACAGATCATCCTCATCCCATCACAATGACCAAAATCATGCTCCAC
HD3A1004	D24	HD3101464	probe	FBgn0035024		CG11414	214	GTGTTGCCTTGCTTTCGAGT	GGTTTTCCGTTCTGCATTTC	GTGTTGCCTTGCTTTCGAGTTGGCGTTGCAAAAATTCCCCTTTATTTTGCTGACGAGATATTCCAAAAGAGTAAACAAACCGGGGGATCCAAGAAACCCCAGCTTTTATCCGAAAGCAGTCGTTACACGTACATTTTCAAGTGCCCGTGGCAACAAGTAAATTCCCCCCCTCCATTCACTGCAAAATCTCTAGTGAAATGCAGAACGGAAAACC
HD3A1004	E01	HD3101177	probe	FBgn0051040	Cog7	Cog7	209	ACACGGGATGCCCATATTT	CGCGGGTACTGTTGGATAAA	ACACGGGATGCCCATATTTTGCAGCTTTTGAAGACCTCCAATGAAAGATTAGAGATGCTGGCCTTGTTCGCCAAGGTTAATCACAGTTTTGTGCTGCACTTAAACTCCCTTCTTGAGCAATCGCACATAACCTTGTCCGAGGAATTGCATCGCCTGCTCGGTGAGGCGATTTTCGAGTATTTCCACAAGTTTATCCAACAGTACCCGCG
HD3A1004	E02	HD3101273	empty
HD3A1004	E03	HD3101178	probe	FBgn0053554	Nipped-A	Nipped-A	205	CGGGAGTATCATTTCGAGCA	TGCCAACAATTTTTAAGGGC	CGGGAGTATCATTTCGAGCAGTTATTAAAAGTAGTCGGTATAATAATTTAATACATTATTTAAATACACACACAGAATTTCCAGAAGCACTCAAATATGAAATTCAGCACCAAGCCGTTTTAATAATTTTTACATTAATGGAATCAGACGATCAATGGATACCAACACGACAAGATATTGTTGACGCCCTTAAAAATTGTTGGCA
HD3A1004	E04	HD3101274	probe	FBgn0032156		CG13124	220	CCCCATATGCGGACTATTTG	TAGATGGGTTTGTTTGTGCG	CCCCATATGCGGACTATTTGGGCGTGGAGGGACGCTTCGAAATATTAATTATTTCTGACACTGTTTACGGCTTGACTTGGCGCATGCCAAGCATGATTAAACGAGACACGAAAGAGCGTATCTACGAAGTAGATAAATATCTTTATACGAACAACTAAGCTGCGGCACCAAGCAACAATCGAATCGACGAATAGCAACAACGCACAAACAAACCCATCTA
HD3A1004	E05	HD3101179	probe	FBgn0264493	roadkill	rdx	221	GGTTTAATTGCACCCACCAC	TTGCGCTTAACAAAGAGAAACA	GGTTTAATTGCACCCACCACCCACCAAAATCGAAGAACTCCCCCATGAAATTGAGGAGAATGTAAAAATTTATTGTTTACCCGAGTTCTAAACTTTAATTTACTTTTCATCGCTGAATTCATGCCTGAACTTTTGTTTTTCGATTCCCCTCGTCTTTTCTTAAGTATCTAAAAGTATCTAAATTTCAATATCAGACGCCTGTTTCTCTTTGTTAAGCGCAA
HD3A1004	E06	HD3101275	probe	FBgn0001108	Glued	Gl	203	GCCGGGCCTCTCTACTTATG	CCAGTTCATCAATCTTGGCA	GCCGGGCCTCTCTACTTATGAATTCAAACAGCTGGAGCAACAGAACATTCGTTTGAAGGAAACACTAGTGCGTCTGAGGGATCTATCTGCTCACGACAAGCACGACATCCAAAAGTTGAGCAAGGAACTGGAGATGAAGCGCTCTGAAGTCACCGAACTGGAGCGCACCAAGGAGAAGCTTAGTGCCAAGATTGATGAACTGG
HD3A1004	E07	HD3101180	probe	FBgn0261383	Integrator 6	IntS6	224	GAAACTGGGAAGGGGAAGAG	TGTTGCTTGTTTGGTATGCG	GAAACTGGGAAGGGGAAGAGCAGCCGCGGAAGCCAAGAATTCTCGTCAATTTCCATATACTGTAAATAATTGCCAGGACAGGTAGCCCACAGGATCTGGATGGGGATCAACGCATACCAAACAAGCAACAATAATATTAACAATTTCCATATACTGTAAATAATTGCCAGGACAGGTAGCCCACAGGATCTGGATGGGGATCAACGCATACCAAACAAGCAACA
HD3A1004	E08	HD3101276	probe	FBgn0011217	effete	eff	202	TGGCACGAGAGTGGACTAGA	CCACTTACAATGACGCTGCT	TGGCACGAGAGTGGACTAGAAAGTATGCTATGTGATGCGTTCCAGATTGCAGCAGTCCAACAGAATCAGCAAATTCAACATCAACAATAGCAGAAGTAAAAGCAGATGCAACAACAACAGTAAAAGCAACAAAGATAACATCAACAGTTTACAATAGTCAGATTCAGAAGAGGAGGAGCTGCAGCAGCGTCATTGTAAGTGG
HD3A1004	E09	HD3101181	probe	FBgn0034975	enoki mushroom	enok	221	CGGTGTCGAAATTACCCAAC	CTGGTTTTCCCTTTCGTCAA	CGGTGTCGAAATTACCCAACATAATCAAGCCCATTTCTAATCGTGAATATTTGAGCAACCAAATGGAGACAAATTCTAGTTTCAAGGAAATTAATGAAGACAAAATCAGCGTAAAGCAGGGTGTTTCCACGTCCTCAAAGGTGAATCAGGAGTCTTCCGAGTTGTCTACCAAGAATCGGGGACCCAGCTCGGAAAAGTTAATTGACGAAAGGGAAAACCAG
HD3A1004	E10	HD3101277	probe	FBgn0027903		CG12018	218	GGAGAATCAGTTAGCGCCAC	GCTTCTGAGGTCCACTTTCG	GGAGAATCAGTTAGCGCCACAGCCGCCAAGACAGAACTACTCGGATCCGGAGGACAAGATTGTTCTGGAGGATGAACTGCAGCGGGTTCGACTTCAGGGCAAGCTAAATGGACAGCTCTTAGCCACTGGAGTTGTGTGCGCTGCCCTCGGTGGAACAGACAGTGACGGATTTTTTAACGTGGAGGATATACTCTTCTACGAAAGTGGACCTCAGAAGC
HD3A1004	E11	HD3101182	probe	FBgn0031115		CG11710	207	GCTGCCACTGAAAACTCACA	ATGTTTAAAATATTCCAATCCACTTT	GCTGCCACTGAAAACTCACACGGCCGCCTGCAAAACGCTTCTAAGGGCTCGGGCCAACAAGGGTTAAGGTTGGGATTCAGTTTCAAAACACATTCTTATTAGTTTAATGCCTGTATGAAAACAGCCCTATTTTGATGATTTGCTAATTTACATTTGAAGCTCCTAGAGTTTCTGAGAAATTAAAGTGGATTGGAATATTTTAAACAT
HD3A1004	E12	HD3101278	probe	FBgn0027620	ATP-dependent chromatin assembly factor large subunit	Acf1	201	GTCGCTTGGCGTTGTAAAAT	TCGTTGTCGTGGAATGTTTC	GTCGCTTGGCGTTGTAAAATTTATCAGTTGCTCCGCGGTTGTTTTTATTGTGAACTGTTAAACGTGCACTTCGAAGGACTGCCATTTAAACTTAAGGACATTCAAGAGCAAAAGGAAAACACCAAACATGCCCATTTGCAAGCGGGAAGGATTCGACCTGAATCAGAAGGAGGGCAAGAACGAAACATTCCACGACAACGA
HD3A1004	E13	HD3101183	probe	FBgn0030787		CG9609	203	TGGTCCTCGAAAAGATCACC	AGTTGTTTCTCTTTTAGAAGTTGTGG	TGGTCCTCGAAAAGATCACCCAGTCGCTGAAGGATGACCCCGTCGAGGAGCTGCTGGCACAGACCCTGCAGGATGAAGAGGAAAAGGAGCAGGAGTAGAGCAAAAGGCCATTCAAAGGGACGGGAGTGAGAAGGTCTGGTCAAGAGGCTAACAATTGAATGACTACTTTAATTTAAACCACAACTTCTAAAAGAGAAACAACT
HD3A1004	E14	HD3101279	probe	FBgn0036356		CG10222	207	GATTCCCATTACTGCTCGGA	ATCATCGTCCAGTTTGTCCAG	GATTCCCATTACTGCTCGGAGCCTGCCAAATTCATTGCCACTTTGCTGATGGCATTGAACACCATGTTGCGGATGAGTCTACCCCACGTTAATGTGCTTTCCAAGGCCGATCTGCTAAAGAAGCACGAGACCAAGTTACACTTTAACGTGGACTATTATACGGACGTCCTGGACCTCAAGTATCTGCTGGACAAACTGGACGATGAT
HD3A1004	E15	HD3101184	probe	FBgn0019938	RNA polymerase I subunit	RpI1	221	AAAGCTGTCGATTCGTGGAC	CAGCAATCTTGGCAAATGAA	AAAGCTGTCGATTCGTGGACGATTCTTTAATCGTGAAGACTACCAGCAATTGGTGTTTCAGGGACTATCTCAACTTAAAAAGGATATCAAGCTGCTGCCACCGACTATTTTAAAGCCAGCTGTGCTTTGGTCTGGAAAGCAGATCTTGTCCACCATTATCATCAACATAATTCCCGAGGGATACGAAAGAATTAATCTGGATTCATTTGCCAAGATTGCTG
HD3A1004	E16	HD3101280	probe	FBgn0265598	Beadex	Bx	209	CTAGCGGAAAGGATGCAGAA	GTTTAAAAACAAATGGGGCG	CTAGCGGAAAGGATGCAGAAATCCAGAATCGATATTCAAATCTTCGTTTGCTTTGACTGAGTTCAAGTTTTATAGTTTTAAAGGCCTAGTTTAGTTAGCCTACAGAAAAGTACTTGCTGAATTTGCAGACATTTTTAGATCCTAACATTTAAGAGACAATATGTTTACTTAGTTCTATTCGAGAATAACCGCCCCATTTGTTTTTAAAC
HD3A1004	E17	HD3101185	control_rho1	FBgn0014020	Rho1	Rho1	156	TTTGCAGAACTTCCAATGACG	CTCGATGTCGGCCACATAAT	TTTGCAGAACTTCCAATGACGACGATTCGCAAGAAATTGGTAATTGTCGGCGACGGTGCCTGCGGTAAAACTTGCCTTCTGATTGTCTTCAGCAAAGATCAGTTCCCCGAGGTCTATGTGCCCACCGTATTCGAGAATTATGTGGCCGACATCGAG
HD3A1004	E18	HD3101281	control_rho1	FBgn0014020	Rho1	Rho1	156	TTTGCAGAACTTCCAATGACG	CTCGATGTCGGCCACATAAT	TTTGCAGAACTTCCAATGACGACGATTCGCAAGAAATTGGTAATTGTCGGCGACGGTGCCTGCGGTAAAACTTGCCTTCTGATTGTCTTCAGCAAAGATCAGTTCCCCGAGGTCTATGTGCCCACCGTATTCGAGAATTATGTGGCCGACATCGAG
HD3A1004	E19	HD3101186	probe	FBgn0039305		CG11858	202	GAGGTAGCGGCTGCTTACAG	TTCATTTCTTTCCCTCCACC	GAGGTAGCGGCTGCTTACAGCGAGGACAAGGCGCGACAAGGCGGCGATCTCGGATGGCAGATCCGAGGAGCGATGGTGGGCCCATTTCAGGACGCCGCCTTCGCATTGCCCATCTCCACTGTCAACAATCCCGTGTACACAGATCCCCCGATTAAGACCAAGTTTGGCTACCACATCATCATGGTGGAGGGAAAGAAATGAA
HD3A1004	E20	HD3101282	probe	FBgn0031817		CG9531	220	CCATGTCCTTGTCCATGCTA	TTCACATACGGAGGATTGGAG	CCATGTCCTTGTCCATGCTACACAGTCTGCCGCAGGTGGTGGCCACTGCCATTGAGCGTAGCAAGGCGGCAACCGTTCTGGCTGCGGAGAATGCCAAAATGCTGGGGCTGCTGAATCGATTTGAGGTACACAACCACACCATGGAGGAGGACAAGTACCTGCCGGAGGCGCTGAAGGACAAGAAGTACGATTTGATCATCTCCAATCCTCCGTATGTGAA
HD3A1004	E21	HD3101187	probe	FBgn0035851	Mediator complex subunit 24	MED24	224	TGTCGACGAGCTTTTGCTTA	CGCATAGAAAACTAGTGGCG	TGTCGACGAGCTTTTGCTTAGCTTCAGTAAACCAGAGGCATCACAACTTAAGCCAAACAACTTAAGTTGGCAGGAGACTTGCCTTAATCTGCCCGGAGTGCTTCATCATGTGCTAATAGCTTGGGAGCAGGAAACGCTATCCTCGGCGGACGTTAAAAGTATTCTGGACAATATTAAGAGAAGACTTTTCAGTTTTTCCGTTTGCGCCACTAGTTTTCTATGCG
HD3A1004	E22	HD3101283	probe	FBgn0052296	Myocardin-related transcription factor	Mrtf	202	CTAGCGGACCAGCTCAACTC	AGCTCAGGGAATCATCATCG	CTAGCGGACCAGCTCAACTCTCAGATTCAACACCGTCCTGGTCCACTGGAGCTAATCAAAAAGAACATCCTGCATACGGAGAAGCCGATCGAGAAGATAGTCAAGGAGGGACTCGTATCCTTCAAGGCAACCAGCGAGGGCCTGCTCACGAGGCCGCAGCATCCGCACAGTTATGTGACCTTCGATGATGATTCCCTGAGCT
HD3A1004	E23	HD3101188	probe	FBgn0031094		CG9578	209	GAGCAGACAATGGAGGAGAAG	ACGCTCATCACCGATATTCC	GAGCAGACAATGGAGGAGAAGTTCAAGCCTTTCGACTGGACATTCACCTCCACCTACCAGGGCACCATGAACGAAAAAGTGCGATCGGAGACCACGAATCAGACGCTGAACAAGTTCAAGCTGATGCAGCGCGAGAACATCATCTTCTACCACGATTTAACTCTGTTCGAGGATGAGCTGCACGACCACGGAATATCGGTGATGAGCGT
HD3A1004	E24	HD3101284	probe	FBgn0264492	casein kinase IIalpha	CkIIalpha	210	TGAGCACGTCAACAACACAG	TGGTAAAATTCGGCAAGTCC	TGAGCACGTCAACAACACAGATTTCAAGCAACTTTACCAAACATTAACTGATTATGAGATTCGTTACTACTTGTTTGAGCTTCTTAAGGCACTTGACTACTGCCACAGCATGGGAATAATGCATCGTGATGTAAAGCCCCACAATGTTATGATAGATCACGAAAATCGAAAATTGCGCCTTATAGATTGGGGACTTGCCGAATTTTACCA
HD3A1004	F01	HD3101369	probe	FBgn0004379	Kinesin-like protein at 67A	Klp67A	217	GTCAAATTCAATCGTGCTGC	TGGGTCAAAAGAACGAAAAA	GTCAAATTCAATCGTGCTGCTTCGTTCCGCCTGAAGAAGTAGAAAACATGAACTCATTCAGTTAGTTTCAACTTGTGTTTGCCTTGAAGTAACAACTATTCCGCCAGGACCGAGACAGATTCATGTTCAAATTAACCATAGCTATAACCATATATATAGATAGAACACTAACTCCTCCAAACCCTAAGCTCGTTCGTTTTTTCGTTCTTTTGACCCA
HD3A1004	F02	HD3101465	empty
HD3A1004	F03	HD3101370	probe	FBgn0010772	Xe7	Xe7	208	GACGAGTTCAGGGGCAATAA	GATCCAATTCCTCTTCCTGC	GACGAGTTCAGGGGCAATAAGTTGGTCCGAAAGTTTGTGGACAAGACTCAAGCCATCAACATTTGTGTGAGCTTCGACAAACAGAAGCATCTCAGTGACTCGAACATACAGCGCCGAGAACGGATTCGGAAAAAGTTCATCGCGAAAGCCAAGGCCGAGGACGAGGAGCGGGAAAAACTTAAAAAACAGCAGGAAGAGGAATTGGATC
HD3A1004	F04	HD3101466	probe	FBgn0037659	Lysine (K)-specific demethylase 2	Kdm2	213	CTTTGTCCACCGCTTCAAAC	CCGCAGATACGGTAACGACT	CTTTGTCCACCGCTTCAAACTCTGGATCTCAGCTTTGTGAGAGGATTGAACGATGCTGCAATAAGGGACATCCTTTCACCTCCAAAGGATTCGCGACCTGGCTTAAGTGACTCGAAGACGCGTCTAAGGGATCTTAAAGTAATGAAGCTGGCCGGAACAGATATCTCCGATGTGGCTGTGCGCTATATCACGCAGTCGTTACCGTATCTGCGG
HD3A1004	F05	HD3101371	probe	FBgn0034577	capping protein alpha	cpa	221	GTCATCGTCTTGGCCCATTA	TGATCGGTGTCTGCTCCATA	GTCATCGTCTTGGCCCATTAATTGCGGAGAAAAAAGATTGCAGCGCCGAAAAAACGGTCAAGGAAGAGTTCCAGCGACACCGCAACTTCCAACCACTCCACAAGAAGATCCCGTCGAAAGGTAGAACCCTAGGAACCGGAGGGGAAACCAGACCAAACCAAACAACCGCCCAGCCCCGATTTCGTGAATCACCAGTGGAACTATGGAGCAGACACCGATCA
HD3A1004	F06	HD3101467	probe	FBgn0051368		CG31368	212	TTTGGGCTATGGTGATCCTG	CTCCATCGCTTTCCTTTTGA	TTTGGGCTATGGTGATCCTGGAGCTGCCCACTACAGTAATATGCCCAATCAGGAACGCAGTCTGGAGTTTAACGATACCTTCATGGATTACAATCATCTTGAGGCCAGTTTCCCCCAATATAATTTGAAGTGTGAGGTGCCAGTGGAAAACCGCCAACCTCCTTTTAGGCTAATATTTGAGGATGTGCCTATTCAAAAGGAAAGCGATGGAG
HD3A1004	F07	HD3101372	probe	FBgn0032256	RluA-2	RluA-2	207	TGGCAAGTGGTGTTTGTGTT	CATTTTCAACAGCCACGAGA	TGGCAAGTGGTGTTTGTGTTATGAATTAAAGTAACATTTAACTCATTCAATTGAATCATCGCATAAAGCAGAGTGTTTTTGTGTTTGAAACTGAAATCTGCGCACGTGTTGACTAACTTGTTGTTATTATTATAGCGTTGCTTAGATATTCTAGTAAATTGGCCGCAAATCAAAAACTATAAACAATTCTCGTGGCTGTTGAAAATG
HD3A1004	F08	HD3101468	probe	FBgn0037901		CG6744	206	TTTTGGCATAGCACATTCAAA	CCAGGACGTATACCAAGCCA	TTTTGGCATAGCACATTCAAATTACGGTTATAAATATTCCGAAACTTGTTTAGACCGGCTTTTACGGTTTGTGAAAACGTAAGTTGGCAGGCCAGCCAATCAGCTGCTGAACTCCGAAAGGAGAACAATGACTCGGGAATCGGCAGTCGCCACCAAAAGAAATTGGGCGATTCTGGCCGCAGGAGTTGGCTTGGTATACGTCCTGG
HD3A1004	F09	HD3101373	probe	FBgn0011745	Actin-related protein 1	Arp1	205	AAGCCGTGCACAGAAAGACT	ATTTTCTAGGCTGGGAAAGCA	AAGCCGTGCACAGAAAGACTTTTTAGCCTGTTTATAAGCTTAAACGCCATTTGTAAAAGGCTAATTAAAATGTATATCAAATCCTTGTGTCAGCTAACATGAAGTACCCTATAAATTGAAAAGTAAAATGTGTATGTTTTACGCATCAAGGGCGCAAAGTATTTAAAATGCTATTTATTGAAACTGCTTTCCCAGCCTAGAAAAT
HD3A1004	F10	HD3101469	probe	FBgn0039788	Regulatory particle triple-A ATPase 6-related	Rpt6R	117	ATGGCCGTCTCCAAGGTAAT	TCAGTCTGATAATGGAGCTTTCA	ATGGCCGTCTCCAAGGTAATGATGAAGGACTCCGAGAAGAACATGTCCATCAGAAAGTTCTGGAAATAGCTTATATAACTAATTTTAAAACATTTGAAAGCTCCATTATCAGACTGA
HD3A1004	F11	HD3101374	probe	FBgn0031183		CG14621	206	TCAAAGCCACAATGCCACTA	TTTTGAGAAAATGTTTTGCATGG	TCAAAGCCACAATGCCACTATTCACCGTCGTCCTGACACGCGTTTTTTTTGGTGAGAAACAACCGACACTCGTGTACCTGAGCCTGCTGCCCATTATCACCGGCGTGGGAATAGCCACAGTTACGGAGATCTCCTTTGATATGATGGGCCTTATCAGCGCCCTCATCTCCACAATGGGCTTCTCCATGCAAAACATTTTCTCAAAA
HD3A1004	F12	HD3101470	probe	FBgn0029504	Checkpoint suppressor homologue	CHES-1-like	218	TCCCAATGGCAATCTGTGTA	AATTTTGTTGCTGCTGATTGG	TCCCAATGGCAATCTGTGTATAGTCAGCGATTTAATAGAAGAGCTACCCACTAATCTGAGTGAAACCAGTGAACAGGAGTCGACCGGAGGAGCAGCAAGTGGATCGGCACCAGCAGCATCAACTGTGTACAGCACCACAACGGTGCACAAAGGAGCCAGTGGCACCACCACCGTGGTGGAGTACAAGGCCAGCAAAGCCAATCAGCAGCAACAAAATT
HD3A1004	F13	HD3101375	probe	FBgn0035640	mad2	mad2	201	GCATCTGCACCTTCGACATA	AAACATTAGGATGAGGCGGT	GCATCTGCACCTTCGACATAATGATTCACACGCTGCAGAACACCGAATTACCGGCCAAATGGGACGAAACGGGTGCCATTGTCATACAGAATCCGCAGGCCGTCCAGCTGCGCTCCTTTTCTACAGGACTGCACAAGGTGGACACCGTGGTCAACTACAAGATGAGCACTTAAAAGGCAGTACCGCCTCATCCTAATGTTT
HD3A1004	F14	HD3101471	probe	FBgn0004914	Hepatocyte nuclear factor 4	Hnf4	216	AACCCTGTCGCATGACACTT	AAGTATCAAAATGGTTCAAGGCA	AACCCTGTCGCATGACACTTAAACAGGAGCCAGAGACTGGTTACTAGAAGAATAACGAACGGTGCAATATGCAGTTTGCAATAGGACACCCCTTAAGCACACAACCCATACACATACAGGCCCTCTCTTGCTGTACTCCCCACCAAGTGCTATATAGAGATGAAATTGAAATGAAGAACTTACTTAATTGTTATGCCTTGAACCATTTTGATACTT
HD3A1004	F15	HD3101376	probe	FBgn0015374	courtless	crl	209	TGTGCGTCACCGTCAATACT	TTCAGGTAATAGGCCCTCCA	TGTGCGTCACCGTCAATACTTTCTACCCTGAACAACACGATTCCAACAACTCGCTAACCCATAGTTTTCTCAAAAATCCCTCGTTGAGCTAACCGACACAAGTTTCAAATTAGCAAAAATGAAGAACCTAACGTCAAAATCGACTAACTCAAGTTTATCTAGCACACTGACTGCCTCACCGGACTTAACTGGAGGGCCTATTACCTGAA
HD3A1004	F16	HD3101472	probe	FBgn0000273	cAMP-dependent protein kinase 1	Pka-C1	214	ATCGCGATCATAAGCAACCT	GCTTCTCACTGGAGCTCTCTC	ATCGCGATCATAAGCAACCTTAAAGTGTGAAACCAAATGTTAGTCTAAGCCTAAAGTGTATAACTAGTTTAAGACCTCACAAATTAAAGAAACCAATACGTGCTAAAACCATAACTTAAACGCGTCTTAACCAAGCGCCTTTAAAACGCAACCTAAACACCAATTTAAAAGGATATTCAGCGAATAAGAGAGTGAGAGAGCTCCAGTGAGAAGC
HD3A1004	F17	HD3101377	control_rho1	FBgn0014020	Rho1	Rho1	156	TTTGCAGAACTTCCAATGACG	CTCGATGTCGGCCACATAAT	TTTGCAGAACTTCCAATGACGACGATTCGCAAGAAATTGGTAATTGTCGGCGACGGTGCCTGCGGTAAAACTTGCCTTCTGATTGTCTTCAGCAAAGATCAGTTCCCCGAGGTCTATGTGCCCACCGTATTCGAGAATTATGTGGCCGACATCGAG
HD3A1004	F18	HD3101473	control_rho1	FBgn0014020	Rho1	Rho1	156	TTTGCAGAACTTCCAATGACG	CTCGATGTCGGCCACATAAT	TTTGCAGAACTTCCAATGACGACGATTCGCAAGAAATTGGTAATTGTCGGCGACGGTGCCTGCGGTAAAACTTGCCTTCTGATTGTCTTCAGCAAAGATCAGTTCCCCGAGGTCTATGTGCCCACCGTATTCGAGAATTATGTGGCCGACATCGAG
HD3A1004	F19	HD3101378	probe	FBgn0035121	Tudor-SN	Tudor-SN	201	TTGTCGAAGAGGGTCTTGCT	CGTAGTTGACTTTACGCTCCG	TTGTCGAAGAGGGTCTTGCTGAAGTGCACTTTAGTGCTGAAAAATCTGAATACTACCGCCAGTTGAAGATTGCTGAAGACCGTGCCAAGGCCGCCAAAAAGAACATCTGGACAAACTACGTAGAAGAAGTGCCTAAAGAAAAAACTGTCACCGAGGAAGAAAAGGAGGACAAGGTAGTGGCGGAGCGTAAAGTCAACTACG
HD3A1004	F20	HD3101474	probe	FBgn0036811	Mediator complex subunit 11	MED11	107	GGCGGAGACTCCTCAATGT	AATTGGTTGACAAAATGTGCC	GGCGGAGACTCCTCAATGTCAACCAACTAATCTTGCGCTATCTTTAAGGGTAAGGGTTTTAAATTTTTTAGAGTGCATTCCGAAAAGGCACATTTTGTCAACCAATT
HD3A1004	F21	HD3101379	probe	FBgn0022786	Hira	Hira	205	CAAGCCCACAAAATTTCCAC	CGCCGAGCAAGAAGTTAAAG	CAAGCCCACAAAATTTCCACTTAGTAACAATAACGAGGCCAACCAGCGACCCATTAGTAAACAAACGGAAACGAGGACGAAGGATGGCAAACGTAGAATCACTCCCATGTTTATACCTCTCCACGAAGATGGACCCACATCGCTGAGCATGAACATTGTGTCCAGTAGTGGATCGTCTACAACAGCTTTAACTTCTTGCTCGGCG
HD3A1004	F22	HD3101475	probe	FBgn0029868		CG3446	140	CCTAAGCACGCACCTTTTTG	GTCCAGCACAGGATTTGGAT	CCTAAGCACGCACCTTTTTGTTTGTAGATCATCCGCCTAAGCGCCAAAAAAAGAAAGTATCGACCAATTATAATGTCAGATCAGATTGGCTGAAATACCGATTCTCTTTGTGTGTGTTTAATCCAAATCCTGTGCTGGAC
HD3A1004	F23	HD3101380	probe	FBgn0034704		CG6758	208	GAGAAGGGCCTCATCGACTT	GCATGTGCGTCAAATCAAAG	GAGAAGGGCCTCATCGACTTTCGACTGCGCTGGGAGGTGTTTTCCCAGCAGACAGTCAATGGCGGGGCAGGAGCACTATTATCCTTTATTGCCGGAAGATTTGCTCATTCGGCTGTGCGGCAAGACAACTCCATGTACGTATTCGGCGGTGGATCCTCGTCGGACACCACCTTCAACGATCTGTGGCGCTTTGATTTGACGCACATGC
HD3A1004	F24	HD3101476	probe	FBgn0000382	corkscrew	csw	225	CGCTGGTTACAAACCACAAA	GTTGAATTTGGAGGAGGTGG	CGCTGGTTACAAACCACAAAAGTTGCTTAACTTTAAATTTTACGAATCGACATTTATGATATTTCGCATGCTTGAAAATAGTTGTAGTTTCCTATTTGGGAATCATTGAAAAATCCATTTATAAAGCGAAATCCAGTTCTGGCACGTTCAATTTGAATCGGTTAATTTCTAATCTAGTTGGCGAAAAAGTGAAGAAAAGTGAAGTCCACCTCCTCCAAATTCAAC
HD3A1004	G01	HD3101189	probe	FBgn0025638	Roc1a	Roc1a	201	TTGGGTCATTGGGTTCCATA	AAACGCAGCTCTTTCTTTGC	TTGGGTCATTGGGTTCCATAAATGTAGCTCTGCTTAGTTATCCTTGGATGGCATTTGAAGAGGATCTGGCTAGTTCAAACTAGTTTAGTTTTGCTTAACTATATGCGTCATGACCAGCTCCAGATCAGGTTGTTCAGATATATGAAAGTAGTTTCGTAAAAACAAATCAAAATCAGTCGATGCAAAGAAAGAGCTGCGTTT
HD3A1004	G02	HD3101285	empty
HD3A1004	G03	HD3101190	probe	FBgn0086356	tumbleweed	tum	205	GCACCATTAAGAAGCGGAAG	CGAACGCATAAATTATAAAGAAAAGC	GCACCATTAAGAAGCGGAAGTTTTACGGCACACCGCCGGCATCTGCGCACAAGAAATAACGAGACTTTCCTTGTTGGAAAGCATTTGACGTGTTACTTAAGTTTACTTCAAGTATTTTGCAAGTTTTTTGTTTCCGGCCAGCCAACCCCGAGCTGTATTTGTACCCAACCCAACCATAAGCTTTTCTTTATAATTTATGCGTTCG
HD3A1004	G04	HD3101286	probe	FBgn0263593	Lipin	Lpin	202	CGACCGAGCAACAAGTGAAC	CACAAAATTTGCAGCACAGC	CGACCGAGCAACAAGTGAACGGAAGAATCCGAGCAGTGAAGAATCAGAAAGACCGAGGAAACACTCGAGAACTCTTTAATAACATTGTGAACCAAAAAACCAGAAACAGCCACTGAAAATACACGGAAAGCAGAGTGATTCGCCATAGTTTTGCTAGTGTTTTCAAGGGCACCCATCATACAGCTGTGCTGCAAATTTTGTG
HD3A1004	G05	HD3101191	probe	FBgn0025832	Flap endonuclease 1	Fen1	202	GTTGGAAGGTCTGGCCATTA	CGCCACCTTGTAGTTCCAGT	GTTGGAAGGTCTGGCCATTAACAATCGAGAGTTCATTGATCTATGTATTCTGCTGGGTTGCGATTACTGTGAGAGCATCAAGGGTATTGGACCCAAGCGAGCGATCGAACTGATCAACACCTATCGGGATATAGAGACTATTCTGGATAACCTGGACTCTAGCAAATACACCGTGCCCGAGAACTGGAACTACAAGGTGGCG
HD3A1004	G06	HD3101287	probe	FBgn0033081	geminin	geminin	221	ACACGAAATCGAGGGATGAA	TCTTCGGAGATGTGTATTGTGC	ACACGAAATCGAGGGATGAAATTGCATGTGATGCAGCCCCTTGAGCAAACAGTGTTGGACAACAGCGCGCGGCATCGGCATTTTTTGGCGGCCATTACAACGAATGGAAAACTGTGAAGCGTTGCGCACAAATTAATGCATAAACAACAGACAAGCAAGTAGCACACGCTCTGCCGCCTGACAACCAAACCCACCGAAAGCACAATACACATCTCCGAAGA
HD3A1004	G07	HD3101192	probe	FBgn0002905	mutagen-sensitive 308	mus308	207	GACGACAAGGAGAATGCACA	CTGATTGGAAACAACTGCCA	GACGACAAGGAGAATGCACAGCCAGGAAACGGAAATATCCAAGTCCAAAGTGCCGGCAATGAGGTAAATAGCGAGATCCAGGAAATTAACTCGGAGTTTTTCCGGGACGAGTTCTCCTACGAAGTGAATCAGGCCCATAAGCCAGCTGAACAATCAGTGGTCAATGTGTCTCAGGTTCAGCAGCATATGGCAGTTGTTTCCAATCAG
HD3A1004	G08	HD3101288	probe	FBgn0015270	Origin recognition complex subunit 2	Orc2	202	GCCGATCGTGTTTTCAGTTT	GCTTATGCAAAACTTCCCGA	GCCGATCGTGTTTTCAGTTTGCTGTCGGAAATCAAGACATCGGCGGAGCATGAGGGTTCTATTAATGCCATTATGGAGGAGTATCGATCGTACTTTCCCAAGTGGATGTGTATTCTGAACGAAGGCTTCAATATACTTCTATATGGATTGGGCTCCAAGCACCAGCTGCTGCAGTCATTCCATCGGGAAGTTTTGCATAAGC
HD3A1004	G09	HD3101193	probe	FBgn0037897		CG5270	216	TGGAGATGTTTCCACCCAAT	GCAAAGGATGACGGATTAGC	TGGAGATGTTTCCACCCAATCCATTGGTGAATTTCCTGGATACACATAAGGATAAGTTTAGATCGCTGCCACTTCTGCAGTGGGTGATCGATTACCTGGAGGGTCACGCCCGTGATCCACGTCTATACAGGAACTATCAGCTATCCCTTGAATTCCTACGACAAATGGATACCAACGAGCGATCTCCGTTTTGGAAGCTAATCCGTCATCCTTTGC
HD3A1004	G10	HD3101289	probe	FBgn0053193	salvador	sav	223	CACATACTCGCCAGCAGCTA	TCACATTACAAACAAACGCCA	CACATACTCGCCAGCAGCTATATGCACATCATAGTGCTCCTGTAATCGACCTTTAACTTATTTAACCATCGACTCATCGCGAAATCAGTGCCTTATACGAAACCAGACGAGATGGTAGCCAAGCAGATCCATGACAGTTCGAATGCCTTGATGAAACGTAGAATTGTGCTACGTTCTATATAACCTTAATGTGATTTGAGCTTGGCGTTTGTTTGTAATGTGA
HD3A1004	G11	HD3101194	probe	FBgn0004436	Ubiquitin conjugating enzyme	UbcD6	204	TTTGAATCCGCTTGAAAACC	TCACATACCGTGTGGATTGG	TTTGAATCCGCTTGAAAACCTAGTAAACAATTGTCCAGTGTCGTCATTTATGTGAACTATATGTATCTACCAAACCCCAACATAAACATACACATGCTACCTAGATCGAATTATAAGTTTATTGGCTACAAATTGTGAAATTACTAGAAATTGATAATTAAATGTTAGTTTTTAGCAATGTAAACCAATCCACACGGTATGTGA
HD3A1004	G12	HD3101290	probe	FBgn0003866	teashirt	tsh	219	ACGGATAGAGCCACTGGATG	AACTGAACGTGGCAGGAATC	ACGGATAGAGCCACTGGATGCATCTGTCTTTAAAAGTATGGCGGGCATGATTTGTTTTAACTGGACAAAGGAACAAGTATAAACAGAAGAATCCGCCTTGGAAACTGGGAAATTTTGCGATGATTGTGACGATTGTGTTAACGACTGTACAGAATGGTATAATACTCGATACAGTGAGGGTGCTATCTTGGCCCAGCATGATTCCTGCCACGTTCAGTT
HD3A1004	G13	HD3101195	probe	FBgn0039920		CG11360	201	GAAGTTTCTGTGCCTTTGGC	TGTATTGGCGCTATTGTTGG	GAAGTTTCTGTGCCTTTGGCCAAAGCTAATGTTGCTAATATTGTTTTTCGCACTACGTCTAGTAAAACATTGTCTTTCTGTCCTCCCACATCTACATCGGCATCGTTTCATTCCAACTGTAATGCAAATATTTTAACAAGATCTTGTTCATCCGCTTCTTCTACCACTTCTACAAAAAGTACCAACAATAGCGCCAATACA
HD3A1004	G14	HD3101291	probe	FBgn0030208	Protein phosphatase 4 regulatory subunit 2-related protein	PPP4R2r	201	GGAGATCGATGACACCAGC	ACCACTGCTTGCCTTATTGG	GGAGATCGATGACACCAGCCAGGAGGTGATGATGCAGTAGATTGGGCCCATTCAGGAGCCGTAAACACCTTTATTTAACTACTACTCCATATAACTAGTATTTTAAGACAAAAGCCGCAAATAATGTAGATGTAATCCTGCCCTGCTTTCCCTTTTATATCCCAACAGATCCCAATACTTTCCAATAAGGCAAGCAGTGGT
HD3A1004	G15	HD3101196	probe	FBgn0039802	dj-1beta	dj-1beta	122	TCTGCATGGTTTTCTTTGGA	GGCTATGATGAACTCCATCTCC	TCTGCATGGTTTTCTTTGGATTTCCTCAAATTTCAAGGCACTTTTCTAAGTTTACCAAGATGTCGAAAAGCGCGCTGGTGATTTTGGCTCCCGGAGCGGAGGAGATGGAGTTCATCATAGCC
HD3A1004	G16	HD3101292	probe	FBgn0035232		CG12099	205	GAAGAATCGAGCCGCAAGT	CCTAGGTCTCCACACGGAGT	GAAGAATCGAGCCGCAAGTCCAAGTACTTAAAAAAGTACTTTCGCCTCGAATTTAACTGCACTTACTCGCAAAAGCCGCATTTGATTTTTTGGAAATATTACGCAAGTACTATTTCTAGTCGTACCCGTTGGATAATCATGGCTCAGTAAACATGAATCCGCAACGAGAATACTTTGCTCAGCGCACTCCGTGTGGAGACCTAGG
HD3A1004	G17	HD3101197	probe	FBgn0030269		CG18292	207	CGCCGGACCATAGTTAAAGA	CGGTTGCCATTAGATACTCG	CGCCGGACCATAGTTAAAGAATGTTTAGACTAGCTCAGGTTACAATCGGTTAAATCGACAATGCTACAAGTATAGCTGCAGCCCAAGTTATTGGACTTGTGTATCTCTACCGTATACCCATTAATTTGTATCCGTTAATGCAAGACCCAGTTGCTCCTGTGTCTGCGTTAGTGAATGCAATCAATTACGAGTATCTAATGGCAACCG
HD3A1004	G18	HD3101293	probe	FBgn0032348		CG4751	215	CGGTATTCTGGGTAGAAAAAGC	TTCACCGTCACCATCACAGT	CGGTATTCTGGGTAGAAAAAGCAGCTACCTTACTGCATCCATCAGTTTTTTTTCGCAAAACTTAAGTATCTTGGAAGTAAAATATCCGTAGAATTGCACAGAATTCGCGACAAGAACGCATGGAGAACGGAGTGGAACATGGTGTGGACGAGTCAGGCGAGAACCAGGTGCTGAGCAGTTCCGATGGCGAGGGAGACTGTGATGGTGACGGTGAA
HD3A1004	G19	HD3101198	probe	FBgn0051922		CG31922	106	TGCGACTACTGCTGTTGCTT	CGTAACGCTTCAAATAGTTGCTC	TGCGACTACTGCTGTTGCTTTCTGAAAAACGATCTGAATGTGAGGAAATTGCACAATGGTGGTATTGCACACGCAATTGCAAAGAGCAACTATTTGAAGCGTTACG
HD3A1004	G20	HD3101294	probe	FBgn0028683	spt4	spt4	81	CTTGGTTTTGCACGGATTTT	CTTGGGTATCGCGTCAAAG	CTTGGTTTTGCACGGATTTTGTATTTTTAGTTTTAAACCCATAATTGATAAGTAAATATGGCCTTTGACGCGATACCCAAG
HD3A1004	G21	HD3101199	control_pvr	FBgn0032006	PDGF- and VEGF-receptor related	Pvr	175	AGGTATCCATCTGACGGTCG	AAGTACGCCAATGTCGGTTT	AGGTATCCATCTGACGGTCGTAGCTGTAGGTGGCTGTTCCGGATCCGGTTCGTCCGGCTCGGGTGCCCGATCGGGGATCATTGTCCGAATTTCTGCGATGAGTTGGCGGTTGCGTGTTATTGTTGTGCGGCTCATTAATGTAAGAGTGGATCGGGAAACCGACATTGGCGTACTT
HD3A1004	G22	HD3101295	control_pvr	FBgn0032006	PDGF- and VEGF-receptor related	Pvr	175	AGGTATCCATCTGACGGTCG	AAGTACGCCAATGTCGGTTT	AGGTATCCATCTGACGGTCGTAGCTGTAGGTGGCTGTTCCGGATCCGGTTCGTCCGGCTCGGGTGCCCGATCGGGGATCATTGTCCGAATTTCTGCGATGAGTTGGCGGTTGCGTGTTATTGTTGTGCGGCTCATTAATGTAAGAGTGGATCGGGAAACCGACATTGGCGTACTT
HD3A1004	G23	HD3101200	probe	FBgn0031575		Cep97	210	GCTCACCGATCAGGTTCAAA	AAGGTTGAGGGCCTTGTTTT	GCTCACCGATCAGGTTCAAATGCTGCAAAGCTCGATTGGAACCATCGTCAACTGCCTCACAATGGTGTGCAATCTGCCGCAGGACGCTATTAAGAAGCAGGCCGAGATCATTGATTGCAGCTCCACTCAGACGGACCTCATTGCCGTACACACGCCGCAAATAGAGGACCTCACCAATTTTCCATTCACCAAAACAAGGCCCTCAACCTT
HD3A1004	G24	HD3101296	probe	FBgn0021825	Dynamitin	Dmn	202	CAAACAATTTCGCCAAGATCA	GCATGGTATGCATCCACTCAT	CAAACAATTTCGCCAAGATCATCGCAGAGATTGAGCAGAAGCAGGGAACCATCACCACTAGCTTGGTGAACAACAAGGAGCTGCTGCATTCCGTACAGGAGACTTTCGCCCAGAATCTGGAGACTATCAACAGCAAGGTGGCCAAGGTGGAGCAGCGTGTGGCGGCCATATCGTCTGCCAAATGAGTGGATGCATACCATGC
HD3A1004	H01	HD3101381	probe	FBgn0025682	supercoiling factor	scf	208	ATGAATCTCCCACTTCGCAT	GGGGTTTCGTTCCAGTGAC	ATGAATCTCCCACTTCGCATGCCAAATAACTTGTAATCTTGTCTAGCCCTTAAGACCTTAAGAAAGTGCATTATAAACCGACTCGAATGATGGGCCTTCCTTTTGTATGTGGCACCACGACCAATTGATTTGAGGTGATTTGTTTAATTGAAAGGCGTCCACGTCAGCTCTTGGAGCATCAATGGCCACGTCACTGGAACGAAACCCC
HD3A1004	H02	HD3101477	empty
HD3A1004	H03	HD3101382	probe	FBgn0026317	Tsc1	Tsc1	222	ACTCTGCTGCCGATCATACC	GTTGCCTCGCTTGATGAACT	ACTCTGCTGCCGATCATACCGAATTCTGTGCCCAACTTTCTTAACGATCTGTTTGAGGTGTTCGGGCATTTGGCCTCGTGGAAGCTGCAGAATAGCAATAAACTGCCGGACGAGAAGCTCGTCCACCTGCAGTTGGGTCTACAGATGCTATTTCACCGCCTGTACGGCATGTATCCGTGCAGCTTTATTGCCTATTTAGTGGAGTTCATCAAGCGAGGCAAC
HD3A1004	H04	HD3101478	probe	FBgn0263594	lost	lost	202	CGATCAGTCTGGTGTGGAAG	CTTCCAAGAAATTGACATCGG	CGATCAGTCTGGTGTGGAAGCAGGTGCTAAAACTGATGATCGTAAGTTACCAGAGGCTGGCACTGATGAGCGTCGTTCAAAGAAGAACAAGAACAGTGATTTTTGCATTAAGTTGACAAATCTGTCTCGTGATATTCGCGTCAAGGACTTAAAGTCGGAGCTCCGCAAACGCGAATGCACTCCGATGTCAATTTCTTGGAAG
HD3A1004	H05	HD3101383	probe	FBgn0029833		CG5941	207	AGTCGAAGCCCGTGAAGTAG	TTTCAATCCCTCTCTGCTCG	AGTCGAAGCCCGTGAAGTAGGCGAAATAGGAATCTGCACTTGCACTTTTTAGTCTTCTATGTCATGAGAGCAAAGAATGGTTTTTGATATACGCAACTGAGTCCTGATTATTATTTTTTTCTACTAATTTTACTCTGTCAGTTAAACTATTTAAAACATTGCGAAATATAATTAATGGCATTTCAAGCGAGCAGAGAGGGATTGAAA
HD3A1004	H06	HD3101479	probe	FBgn0030053		CG12081	203	ACCTGCAGATGCTGACACAG	CCTCCATTCGTCATCTCTCC	ACCTGCAGATGCTGACACAGCCGAACAGTATTAGCCGGCCCATCAACCAAGCTGGCTAGCGTCCAAAGCCGTAAGGAATAAGCCGGAGTCGACTGCCACAAAATGGAATGAGGTGGAAAAATGGTGTTGAATCACGGAGCCACTAGTCCGGTTCTTTGTATTGGAGCTCGAATAACACTTTCGGGAGAGATGACGAATGGAGG
HD3A1004	H07	HD3101384	probe	FBgn0003964	ultraspiracle	usp	209	AACGAAAAACAAACAAAATCCAA	AGATATGCGCCTGCTGACAT	AACGAAAAACAAACAAAATCCAAAACTTGAAAAGAACACAAAACACGAACGAGAAAATGCACACAAGCAAAGTAAAAGTAAAAGTTAAACTAAAGCTAAACGAGTAAAGATATTAAAATAACGGTTAAAATTAATGCATAGTTATGATCTACAGACGTATGTAAACATACAAATTCAGCATAAATATATATGTCAGCAGGCGCATATCT
HD3A1004	H08	HD3101480	probe	FBgn0004390	Ras GTPase activating protein 1	RasGAP1	211	GTGTAAACCCGCAAAGCAAA	AATATGAGTCGATTTGCCGC	GTGTAAACCCGCAAAGCAAATAAACTCGGAGAACCAAGTTTTTGCGATTCTGATTCAAGCAACCGAATTACTTTCCATACTTCGATAATATAATCCCACGTCTGCTAGTGCGTGCAAAAAACAGTTTGTAGTTAAAACGAAATACTAAAATCAGTCGAGCCCTGAAGCAACAGGGAAAGTGCATTTCGTGAGCGGCAAATCGACTCATATT
HD3A1004	H09	HD3101385	probe	FBgn0266369	Microsomal triacylglycerol transfer protein	Mtp	219	CGCTCTACACTCTCCCACAA	TGCATTTGAAAATTAAATGGTCTT	CGCTCTACACTCTCCCACAAAACTGCCGGCTGCACTTTTGCCCTCAACCAAAAAAACAACGAAATGTGCAACCTCATTTTTAGGGACTTGTAGATTCTACTCAAGAGATTATTGGAGATTCCTTGCATAAAAACTATATTTCTATGTGAAAACTCAGAGATTAAGACTCGATATAGTTGTAAACTTAAACGAACAAAGACCATTTAATTTTCAAATGCA
HD3A1004	H10	HD3101481	probe	FBgn0035918	Cdc6	Cdc6	222	CAGCAGGAGAAACCTCCAAC	TTCCAGGTGATTGCTGAAGA	CAGCAGGAGAAACCTCCAACAAAGCAGCCGAATAAAAACCAAACTAAAGAAAAAAGCAATATCCAAACCAATGAGGAAACCCAACAGAATAACCTGCCATCTCCCTCACGCAACAAATACCAAAACGCCAGACGAGTGCTCAACAGCGCCGAGACACAAAACTTGCCAGGACGTGAGTCCCAGCTCCAAGAGCTACGTGAATTCTTCAGCAATCACCTGGAA
[truncated: 1,742 more rows]
