# Supplementary material for: A map of directional genetic interactions in a metazoan cell
Source: eLife. 2015 Mar 6;4:e05464. doi: 10.7554/eLife.05464 (PMC4384530; doi:10.7554/eLife.05464)
Supplement: Supplementary file 2. — A table of query genes. DOI: http://dx.doi.org/10.7554/eLife.05464.020 [file elife05464s002.xlsx]

## Sheet: Table_S2_QueryGenes
Supplemental Table S2.Query genes
PlateID	384-well plate identifier [whole combinatorial experiment]
TargetPlateNum384	384-well plate number [target set]
ID	dsRNA identifier
Design	dsRNA design number
Content	Query dsRNA content ('probe' or controls targeting Fluc)
FBgnID	Current CG gene identifier
Name	Current gene name
Symbol	Current gene symbol
Batch	processing batch number
PlateID	TargetPlateNum384	ID	Design	Content	FBgnID	Name	Symbol	Batch
A1001BD001	HD3A1001	HD3100004	1	probe	FBgn0051156		CG31156	1
A1002BD001	HD3A1002	HD3100004	1	probe	FBgn0051156		CG31156	1
A1003BD001	HD3A1003	HD3100004	1	probe	FBgn0051156		CG31156	1
A1004BD001	HD3A1004	HD3100004	1	probe	FBgn0051156		CG31156	1
A2001BD001	HD3A2001	HD3100004	1	probe	FBgn0051156		CG31156	1
A2002BD001	HD3A2002	HD3100004	1	probe	FBgn0051156		CG31156	1
A2003BD001	HD3A2003	HD3100004	1	probe	FBgn0051156		CG31156	1
A2004BD001	HD3A2004	HD3100004	1	probe	FBgn0051156		CG31156	1
A1001BD002	HD3A1001	HD3200004	2	probe	FBgn0051156		CG31156	1
A1002BD002	HD3A1002	HD3200004	2	probe	FBgn0051156		CG31156	1
A1003BD002	HD3A1003	HD3200004	2	probe	FBgn0051156		CG31156	1
A1004BD002	HD3A1004	HD3200004	2	probe	FBgn0051156		CG31156	1
A2001BD002	HD3A2001	HD3200004	2	probe	FBgn0051156		CG31156	1
A2002BD002	HD3A2002	HD3200004	2	probe	FBgn0051156		CG31156	1
A2003BD002	HD3A2003	HD3200004	2	probe	FBgn0051156		CG31156	1
A2004BD002	HD3A2004	HD3200004	2	probe	FBgn0051156		CG31156	1
A1001BD003	HD3A1001	HD3100013	1	probe	FBgn0041111	lilliputian	lilli	1
A1002BD003	HD3A1002	HD3100013	1	probe	FBgn0041111	lilliputian	lilli	1
A1003BD003	HD3A1003	HD3100013	1	probe	FBgn0041111	lilliputian	lilli	1
A1004BD003	HD3A1004	HD3100013	1	probe	FBgn0041111	lilliputian	lilli	1
A2001BD003	HD3A2001	HD3100013	1	probe	FBgn0041111	lilliputian	lilli	1
A2002BD003	HD3A2002	HD3100013	1	probe	FBgn0041111	lilliputian	lilli	1
A2003BD003	HD3A2003	HD3100013	1	probe	FBgn0041111	lilliputian	lilli	1
A2004BD003	HD3A2004	HD3100013	1	probe	FBgn0041111	lilliputian	lilli	1
F1001BD001	HD3A1001	control_fluc	1	control_fluc				1
F1002BD001	HD3A1002	control_fluc	1	control_fluc				1
F1003BD001	HD3A1003	control_fluc	1	control_fluc				1
F1004BD001	HD3A1004	control_fluc	1	control_fluc				1
A1001BD004	HD3A1001	HD3200013	2	probe	FBgn0041111	lilliputian	lilli	1
A1002BD004	HD3A1002	HD3200013	2	probe	FBgn0041111	lilliputian	lilli	1
A1003BD004	HD3A1003	HD3200013	2	probe	FBgn0041111	lilliputian	lilli	1
A1004BD004	HD3A1004	HD3200013	2	probe	FBgn0041111	lilliputian	lilli	1
A2001BD004	HD3A2001	HD3200013	2	probe	FBgn0041111	lilliputian	lilli	1
A2002BD004	HD3A2002	HD3200013	2	probe	FBgn0041111	lilliputian	lilli	1
A2003BD004	HD3A2003	HD3200013	2	probe	FBgn0041111	lilliputian	lilli	1
A2004BD004	HD3A2004	HD3200013	2	probe	FBgn0041111	lilliputian	lilli	1
A1001BD005	HD3A1001	HD3100026	1	probe	FBgn0263968	no-on-and-no-off transient C	nonC	1
A1002BD005	HD3A1002	HD3100026	1	probe	FBgn0263968	no-on-and-no-off transient C	nonC	1
A1003BD005	HD3A1003	HD3100026	1	probe	FBgn0263968	no-on-and-no-off transient C	nonC	1
A1004BD005	HD3A1004	HD3100026	1	probe	FBgn0263968	no-on-and-no-off transient C	nonC	1
A2001BD005	HD3A2001	HD3100026	1	probe	FBgn0263968	no-on-and-no-off transient C	nonC	1
A2002BD005	HD3A2002	HD3100026	1	probe	FBgn0263968	no-on-and-no-off transient C	nonC	1
A2003BD005	HD3A2003	HD3100026	1	probe	FBgn0263968	no-on-and-no-off transient C	nonC	1
A2004BD005	HD3A2004	HD3100026	1	probe	FBgn0263968	no-on-and-no-off transient C	nonC	1
A1001BD006	HD3A1001	HD3200026	2	probe	FBgn0263968	no-on-and-no-off transient C	nonC	1
A1002BD006	HD3A1002	HD3200026	2	probe	FBgn0263968	no-on-and-no-off transient C	nonC	1
A1003BD006	HD3A1003	HD3200026	2	probe	FBgn0263968	no-on-and-no-off transient C	nonC	1
A1004BD006	HD3A1004	HD3200026	2	probe	FBgn0263968	no-on-and-no-off transient C	nonC	1
A2001BD006	HD3A2001	HD3200026	2	probe	FBgn0263968	no-on-and-no-off transient C	nonC	1
A2002BD006	HD3A2002	HD3200026	2	probe	FBgn0263968	no-on-and-no-off transient C	nonC	1
A2003BD006	HD3A2003	HD3200026	2	probe	FBgn0263968	no-on-and-no-off transient C	nonC	1
A2004BD006	HD3A2004	HD3200026	2	probe	FBgn0263968	no-on-and-no-off transient C	nonC	1
A1001BD007	HD3A1001	HD3100028	1	probe	FBgn0026597	Axin	Axn	1
A1002BD007	HD3A1002	HD3100028	1	probe	FBgn0026597	Axin	Axn	1
A1003BD007	HD3A1003	HD3100028	1	probe	FBgn0026597	Axin	Axn	1
A1004BD007	HD3A1004	HD3100028	1	probe	FBgn0026597	Axin	Axn	1
A2001BD007	HD3A2001	HD3100028	1	probe	FBgn0026597	Axin	Axn	1
A2002BD007	HD3A2002	HD3100028	1	probe	FBgn0026597	Axin	Axn	1
A2003BD007	HD3A2003	HD3100028	1	probe	FBgn0026597	Axin	Axn	1
A2004BD007	HD3A2004	HD3100028	1	probe	FBgn0026597	Axin	Axn	1
A1001BD008	HD3A1001	HD3200028	2	probe	FBgn0026597	Axin	Axn	1
A1002BD008	HD3A1002	HD3200028	2	probe	FBgn0026597	Axin	Axn	1
A1003BD008	HD3A1003	HD3200028	2	probe	FBgn0026597	Axin	Axn	1
A1004BD008	HD3A1004	HD3200028	2	probe	FBgn0026597	Axin	Axn	1
A2001BD008	HD3A2001	HD3200028	2	probe	FBgn0026597	Axin	Axn	1
A2002BD008	HD3A2002	HD3200028	2	probe	FBgn0026597	Axin	Axn	1
A2003BD008	HD3A2003	HD3200028	2	probe	FBgn0026597	Axin	Axn	1
A2004BD008	HD3A2004	HD3200028	2	probe	FBgn0026597	Axin	Axn	1
A1001BD009	HD3A1001	HD3100030	1	probe	FBgn0030276	Dynein light intermediate chain	Dlic	1
A1002BD009	HD3A1002	HD3100030	1	probe	FBgn0030276	Dynein light intermediate chain	Dlic	1
A1003BD009	HD3A1003	HD3100030	1	probe	FBgn0030276	Dynein light intermediate chain	Dlic	1
A1004BD009	HD3A1004	HD3100030	1	probe	FBgn0030276	Dynein light intermediate chain	Dlic	1
A2001BD009	HD3A2001	HD3100030	1	probe	FBgn0030276	Dynein light intermediate chain	Dlic	1
A2002BD009	HD3A2002	HD3100030	1	probe	FBgn0030276	Dynein light intermediate chain	Dlic	1
A2003BD009	HD3A2003	HD3100030	1	probe	FBgn0030276	Dynein light intermediate chain	Dlic	1
A2004BD009	HD3A2004	HD3100030	1	probe	FBgn0030276	Dynein light intermediate chain	Dlic	1
F2001BD001	HD3A2001	control_fluc	1	control_fluc				1
F2002BD001	HD3A2002	control_fluc	1	control_fluc				1
F2003BD001	HD3A2003	control_fluc	1	control_fluc				1
F2004BD001	HD3A2004	control_fluc	1	control_fluc				1
A1001BD010	HD3A1001	HD3200030	2	probe	FBgn0030276	Dynein light intermediate chain	Dlic	1
A1002BD010	HD3A1002	HD3200030	2	probe	FBgn0030276	Dynein light intermediate chain	Dlic	1
A1003BD010	HD3A1003	HD3200030	2	probe	FBgn0030276	Dynein light intermediate chain	Dlic	1
A1004BD010	HD3A1004	HD3200030	2	probe	FBgn0030276	Dynein light intermediate chain	Dlic	1
A2001BD010	HD3A2001	HD3200030	2	probe	FBgn0030276	Dynein light intermediate chain	Dlic	1
A2002BD010	HD3A2002	HD3200030	2	probe	FBgn0030276	Dynein light intermediate chain	Dlic	1
A2003BD010	HD3A2003	HD3200030	2	probe	FBgn0030276	Dynein light intermediate chain	Dlic	1
A2004BD010	HD3A2004	HD3200030	2	probe	FBgn0030276	Dynein light intermediate chain	Dlic	1
A1001BD011	HD3A1001	HD3100036	1	probe	FBgn0000617	enhancer of yellow 1	e(y)1	1
A1002BD011	HD3A1002	HD3100036	1	probe	FBgn0000617	enhancer of yellow 1	e(y)1	1
A1003BD011	HD3A1003	HD3100036	1	probe	FBgn0000617	enhancer of yellow 1	e(y)1	1
A1004BD011	HD3A1004	HD3100036	1	probe	FBgn0000617	enhancer of yellow 1	e(y)1	1
A2001BD011	HD3A2001	HD3100036	1	probe	FBgn0000617	enhancer of yellow 1	e(y)1	1
A2002BD011	HD3A2002	HD3100036	1	probe	FBgn0000617	enhancer of yellow 1	e(y)1	1
A2003BD011	HD3A2003	HD3100036	1	probe	FBgn0000617	enhancer of yellow 1	e(y)1	1
A2004BD011	HD3A2004	HD3100036	1	probe	FBgn0000617	enhancer of yellow 1	e(y)1	1
A1001BD012	HD3A1001	HD3200036	2	probe	FBgn0000617	enhancer of yellow 1	e(y)1	1
A1002BD012	HD3A1002	HD3200036	2	probe	FBgn0000617	enhancer of yellow 1	e(y)1	1
A1003BD012	HD3A1003	HD3200036	2	probe	FBgn0000617	enhancer of yellow 1	e(y)1	1
A1004BD012	HD3A1004	HD3200036	2	probe	FBgn0000617	enhancer of yellow 1	e(y)1	1
A2001BD012	HD3A2001	HD3200036	2	probe	FBgn0000617	enhancer of yellow 1	e(y)1	1
A2002BD012	HD3A2002	HD3200036	2	probe	FBgn0000617	enhancer of yellow 1	e(y)1	1
A2003BD012	HD3A2003	HD3200036	2	probe	FBgn0000617	enhancer of yellow 1	e(y)1	1
A2004BD012	HD3A2004	HD3200036	2	probe	FBgn0000617	enhancer of yellow 1	e(y)1	1
A1001BD013	HD3A1001	HD3100064	1	probe	FBgn0002914	Myb oncogene-like	Myb	2
A1002BD013	HD3A1002	HD3100064	1	probe	FBgn0002914	Myb oncogene-like	Myb	2
A1003BD013	HD3A1003	HD3100064	1	probe	FBgn0002914	Myb oncogene-like	Myb	2
A1004BD013	HD3A1004	HD3100064	1	probe	FBgn0002914	Myb oncogene-like	Myb	2
A2001BD013	HD3A2001	HD3100064	1	probe	FBgn0002914	Myb oncogene-like	Myb	2
A2002BD013	HD3A2002	HD3100064	1	probe	FBgn0002914	Myb oncogene-like	Myb	2
A2003BD013	HD3A2003	HD3100064	1	probe	FBgn0002914	Myb oncogene-like	Myb	2
A2004BD013	HD3A2004	HD3100064	1	probe	FBgn0002914	Myb oncogene-like	Myb	2
A1001BD014	HD3A1001	HD3200064	2	probe	FBgn0002914	Myb oncogene-like	Myb	2
A1002BD014	HD3A1002	HD3200064	2	probe	FBgn0002914	Myb oncogene-like	Myb	2
A1003BD014	HD3A1003	HD3200064	2	probe	FBgn0002914	Myb oncogene-like	Myb	2
A1004BD014	HD3A1004	HD3200064	2	probe	FBgn0002914	Myb oncogene-like	Myb	2
A2001BD014	HD3A2001	HD3200064	2	probe	FBgn0002914	Myb oncogene-like	Myb	2
A2002BD014	HD3A2002	HD3200064	2	probe	FBgn0002914	Myb oncogene-like	Myb	2
A2003BD014	HD3A2003	HD3200064	2	probe	FBgn0002914	Myb oncogene-like	Myb	2
A2004BD014	HD3A2004	HD3200064	2	probe	FBgn0002914	Myb oncogene-like	Myb	2
A1001BD015	HD3A1001	HD3100068	1	probe	FBgn0024188	separation anxiety	san	2
A1002BD015	HD3A1002	HD3100068	1	probe	FBgn0024188	separation anxiety	san	2
A1003BD015	HD3A1003	HD3100068	1	probe	FBgn0024188	separation anxiety	san	2
A1004BD015	HD3A1004	HD3100068	1	probe	FBgn0024188	separation anxiety	san	2
A2001BD015	HD3A2001	HD3100068	1	probe	FBgn0024188	separation anxiety	san	2
A2002BD015	HD3A2002	HD3100068	1	probe	FBgn0024188	separation anxiety	san	2
A2003BD015	HD3A2003	HD3100068	1	probe	FBgn0024188	separation anxiety	san	2
A2004BD015	HD3A2004	HD3100068	1	probe	FBgn0024188	separation anxiety	san	2
F1001BD002	HD3A1001	control_fluc	1	control_fluc				2
F1002BD002	HD3A1002	control_fluc	1	control_fluc				2
F1003BD002	HD3A1003	control_fluc	1	control_fluc				2
F1004BD002	HD3A1004	control_fluc	1	control_fluc				2
A1001BD016	HD3A1001	HD3200068	2	probe	FBgn0024188	separation anxiety	san	2
A1002BD016	HD3A1002	HD3200068	2	probe	FBgn0024188	separation anxiety	san	2
A1003BD016	HD3A1003	HD3200068	2	probe	FBgn0024188	separation anxiety	san	2
A1004BD016	HD3A1004	HD3200068	2	probe	FBgn0024188	separation anxiety	san	2
A2001BD016	HD3A2001	HD3200068	2	probe	FBgn0024188	separation anxiety	san	2
A2002BD016	HD3A2002	HD3200068	2	probe	FBgn0024188	separation anxiety	san	2
A2003BD016	HD3A2003	HD3200068	2	probe	FBgn0024188	separation anxiety	san	2
A2004BD016	HD3A2004	HD3200068	2	probe	FBgn0024188	separation anxiety	san	2
A1001BD017	HD3A1001	HD3100092	1	probe	FBgn0027783	SMC2	SMC2	2
A1002BD017	HD3A1002	HD3100092	1	probe	FBgn0027783	SMC2	SMC2	2
A1003BD017	HD3A1003	HD3100092	1	probe	FBgn0027783	SMC2	SMC2	2
A1004BD017	HD3A1004	HD3100092	1	probe	FBgn0027783	SMC2	SMC2	2
A2001BD017	HD3A2001	HD3100092	1	probe	FBgn0027783	SMC2	SMC2	2
A2002BD017	HD3A2002	HD3100092	1	probe	FBgn0027783	SMC2	SMC2	2
A2003BD017	HD3A2003	HD3100092	1	probe	FBgn0027783	SMC2	SMC2	2
A2004BD017	HD3A2004	HD3100092	1	probe	FBgn0027783	SMC2	SMC2	2
A1001BD018	HD3A1001	HD3200092	2	probe	FBgn0027783	SMC2	SMC2	2
A1002BD018	HD3A1002	HD3200092	2	probe	FBgn0027783	SMC2	SMC2	2
A1003BD018	HD3A1003	HD3200092	2	probe	FBgn0027783	SMC2	SMC2	2
A1004BD018	HD3A1004	HD3200092	2	probe	FBgn0027783	SMC2	SMC2	2
A2001BD018	HD3A2001	HD3200092	2	probe	FBgn0027783	SMC2	SMC2	2
A2002BD018	HD3A2002	HD3200092	2	probe	FBgn0027783	SMC2	SMC2	2
A2003BD018	HD3A2003	HD3200092	2	probe	FBgn0027783	SMC2	SMC2	2
A2004BD018	HD3A2004	HD3200092	2	probe	FBgn0027783	SMC2	SMC2	2
A1001BD019	HD3A1001	HD3100103	1	probe	FBgn0260012		pds5	2
A1002BD019	HD3A1002	HD3100103	1	probe	FBgn0260012		pds5	2
A1003BD019	HD3A1003	HD3100103	1	probe	FBgn0260012		pds5	2
A1004BD019	HD3A1004	HD3100103	1	probe	FBgn0260012		pds5	2
A2001BD019	HD3A2001	HD3100103	1	probe	FBgn0260012		pds5	2
A2002BD019	HD3A2002	HD3100103	1	probe	FBgn0260012		pds5	2
A2003BD019	HD3A2003	HD3100103	1	probe	FBgn0260012		pds5	2
A2004BD019	HD3A2004	HD3100103	1	probe	FBgn0260012		pds5	2
A1001BD020	HD3A1001	HD3200103	2	probe	FBgn0260012		pds5	2
A1002BD020	HD3A1002	HD3200103	2	probe	FBgn0260012		pds5	2
A1003BD020	HD3A1003	HD3200103	2	probe	FBgn0260012		pds5	2
A1004BD020	HD3A1004	HD3200103	2	probe	FBgn0260012		pds5	2
A2001BD020	HD3A2001	HD3200103	2	probe	FBgn0260012		pds5	2
A2002BD020	HD3A2002	HD3200103	2	probe	FBgn0260012		pds5	2
A2003BD020	HD3A2003	HD3200103	2	probe	FBgn0260012		pds5	2
A2004BD020	HD3A2004	HD3200103	2	probe	FBgn0260012		pds5	2
A1001BD021	HD3A1001	HD3100126	1	probe	FBgn0030855		CG5800	2
A1002BD021	HD3A1002	HD3100126	1	probe	FBgn0030855		CG5800	2
A1003BD021	HD3A1003	HD3100126	1	probe	FBgn0030855		CG5800	2
A1004BD021	HD3A1004	HD3100126	1	probe	FBgn0030855		CG5800	2
A2001BD021	HD3A2001	HD3100126	1	probe	FBgn0030855		CG5800	2
A2002BD021	HD3A2002	HD3100126	1	probe	FBgn0030855		CG5800	2
A2003BD021	HD3A2003	HD3100126	1	probe	FBgn0030855		CG5800	2
A2004BD021	HD3A2004	HD3100126	1	probe	FBgn0030855		CG5800	2
F2001BD002	HD3A2001	control_fluc	1	control_fluc				2
F2002BD002	HD3A2002	control_fluc	1	control_fluc				2
F2003BD002	HD3A2003	control_fluc	1	control_fluc				2
F2004BD002	HD3A2004	control_fluc	1	control_fluc				2
A1001BD022	HD3A1001	HD3200126	2	probe	FBgn0030855		CG5800	2
A1002BD022	HD3A1002	HD3200126	2	probe	FBgn0030855		CG5800	2
A1003BD022	HD3A1003	HD3200126	2	probe	FBgn0030855		CG5800	2
A1004BD022	HD3A1004	HD3200126	2	probe	FBgn0030855		CG5800	2
A2001BD022	HD3A2001	HD3200126	2	probe	FBgn0030855		CG5800	2
A2002BD022	HD3A2002	HD3200126	2	probe	FBgn0030855		CG5800	2
A2003BD022	HD3A2003	HD3200126	2	probe	FBgn0030855		CG5800	2
A2004BD022	HD3A2004	HD3200126	2	probe	FBgn0030855		CG5800	2
A1001BD029	HD3A1001	HD3100208	1	probe	FBgn0030711		Rrp47	2
A1002BD029	HD3A1002	HD3100208	1	probe	FBgn0030711		Rrp47	2
A1003BD029	HD3A1003	HD3100208	1	probe	FBgn0030711		Rrp47	2
A1004BD029	HD3A1004	HD3100208	1	probe	FBgn0030711		Rrp47	2
A2001BD029	HD3A2001	HD3100208	1	probe	FBgn0030711		Rrp47	2
A2002BD029	HD3A2002	HD3100208	1	probe	FBgn0030711		Rrp47	2
A2003BD029	HD3A2003	HD3100208	1	probe	FBgn0030711		Rrp47	2
A2004BD029	HD3A2004	HD3100208	1	probe	FBgn0030711		Rrp47	2
A1001BD030	HD3A1001	HD3200208	2	probe	FBgn0030711		Rrp47	2
A1002BD030	HD3A1002	HD3200208	2	probe	FBgn0030711		Rrp47	2
A1003BD030	HD3A1003	HD3200208	2	probe	FBgn0030711		Rrp47	2
A1004BD030	HD3A1004	HD3200208	2	probe	FBgn0030711		Rrp47	2
A2001BD030	HD3A2001	HD3200208	2	probe	FBgn0030711		Rrp47	2
A2002BD030	HD3A2002	HD3200208	2	probe	FBgn0030711		Rrp47	2
A2003BD030	HD3A2003	HD3200208	2	probe	FBgn0030711		Rrp47	2
A2004BD030	HD3A2004	HD3200208	2	probe	FBgn0030711		Rrp47	2
A1001BD023	HD3A1001	HD3100138	1	probe	FBgn0015396	jumeau	jumu	3
A1002BD023	HD3A1002	HD3100138	1	probe	FBgn0015396	jumeau	jumu	3
A1003BD023	HD3A1003	HD3100138	1	probe	FBgn0015396	jumeau	jumu	3
A1004BD023	HD3A1004	HD3100138	1	probe	FBgn0015396	jumeau	jumu	3
A2001BD023	HD3A2001	HD3100138	1	probe	FBgn0015396	jumeau	jumu	3
A2002BD023	HD3A2002	HD3100138	1	probe	FBgn0015396	jumeau	jumu	3
A2003BD023	HD3A2003	HD3100138	1	probe	FBgn0015396	jumeau	jumu	3
A2004BD023	HD3A2004	HD3100138	1	probe	FBgn0015396	jumeau	jumu	3
A1001BD024	HD3A1001	HD3200138	2	probe	FBgn0015396	jumeau	jumu	3
A1002BD024	HD3A1002	HD3200138	2	probe	FBgn0015396	jumeau	jumu	3
A1003BD024	HD3A1003	HD3200138	2	probe	FBgn0015396	jumeau	jumu	3
A1004BD024	HD3A1004	HD3200138	2	probe	FBgn0015396	jumeau	jumu	3
A2001BD024	HD3A2001	HD3200138	2	probe	FBgn0015396	jumeau	jumu	3
A2002BD024	HD3A2002	HD3200138	2	probe	FBgn0015396	jumeau	jumu	3
A2003BD024	HD3A2003	HD3200138	2	probe	FBgn0015396	jumeau	jumu	3
A2004BD024	HD3A2004	HD3200138	2	probe	FBgn0015396	jumeau	jumu	3
A1001BD025	HD3A1001	HD3100156	1	probe	FBgn0032863	Cell division cycle 23 ortholog	Cdc23	3
A1002BD025	HD3A1002	HD3100156	1	probe	FBgn0032863	Cell division cycle 23 ortholog	Cdc23	3
A1003BD025	HD3A1003	HD3100156	1	probe	FBgn0032863	Cell division cycle 23 ortholog	Cdc23	3
A1004BD025	HD3A1004	HD3100156	1	probe	FBgn0032863	Cell division cycle 23 ortholog	Cdc23	3
A2001BD025	HD3A2001	HD3100156	1	probe	FBgn0032863	Cell division cycle 23 ortholog	Cdc23	3
A2002BD025	HD3A2002	HD3100156	1	probe	FBgn0032863	Cell division cycle 23 ortholog	Cdc23	3
A2003BD025	HD3A2003	HD3100156	1	probe	FBgn0032863	Cell division cycle 23 ortholog	Cdc23	3
A2004BD025	HD3A2004	HD3100156	1	probe	FBgn0032863	Cell division cycle 23 ortholog	Cdc23	3
F1001BD003	HD3A1001	control_fluc	1	control_fluc				3
F1002BD003	HD3A1002	control_fluc	1	control_fluc				3
F1003BD003	HD3A1003	control_fluc	1	control_fluc				3
F1004BD003	HD3A1004	control_fluc	1	control_fluc				3
A1001BD026	HD3A1001	HD3200156	2	probe	FBgn0032863	Cell division cycle 23 ortholog	Cdc23	3
A1002BD026	HD3A1002	HD3200156	2	probe	FBgn0032863	Cell division cycle 23 ortholog	Cdc23	3
A1003BD026	HD3A1003	HD3200156	2	probe	FBgn0032863	Cell division cycle 23 ortholog	Cdc23	3
A1004BD026	HD3A1004	HD3200156	2	probe	FBgn0032863	Cell division cycle 23 ortholog	Cdc23	3
A2001BD026	HD3A2001	HD3200156	2	probe	FBgn0032863	Cell division cycle 23 ortholog	Cdc23	3
A2002BD026	HD3A2002	HD3200156	2	probe	FBgn0032863	Cell division cycle 23 ortholog	Cdc23	3
A2003BD026	HD3A2003	HD3200156	2	probe	FBgn0032863	Cell division cycle 23 ortholog	Cdc23	3
A2004BD026	HD3A2004	HD3200156	2	probe	FBgn0032863	Cell division cycle 23 ortholog	Cdc23	3
A1001BD027	HD3A1001	HD3100190	1	probe	FBgn0036124		CG7839	3
A1002BD027	HD3A1002	HD3100190	1	probe	FBgn0036124		CG7839	3
A1003BD027	HD3A1003	HD3100190	1	probe	FBgn0036124		CG7839	3
A1004BD027	HD3A1004	HD3100190	1	probe	FBgn0036124		CG7839	3
A2001BD027	HD3A2001	HD3100190	1	probe	FBgn0036124		CG7839	3
A2002BD027	HD3A2002	HD3100190	1	probe	FBgn0036124		CG7839	3
A2003BD027	HD3A2003	HD3100190	1	probe	FBgn0036124		CG7839	3
A2004BD027	HD3A2004	HD3100190	1	probe	FBgn0036124		CG7839	3
A1001BD028	HD3A1001	HD3200190	2	probe	FBgn0036124		CG7839	3
A1002BD028	HD3A1002	HD3200190	2	probe	FBgn0036124		CG7839	3
A1003BD028	HD3A1003	HD3200190	2	probe	FBgn0036124		CG7839	3
A1004BD028	HD3A1004	HD3200190	2	probe	FBgn0036124		CG7839	3
A2001BD028	HD3A2001	HD3200190	2	probe	FBgn0036124		CG7839	3
A2002BD028	HD3A2002	HD3200190	2	probe	FBgn0036124		CG7839	3
A2003BD028	HD3A2003	HD3200190	2	probe	FBgn0036124		CG7839	3
A2004BD028	HD3A2004	HD3200190	2	probe	FBgn0036124		CG7839	3
A1001BD031	HD3A1001	HD3100211	1	probe	FBgn0026722	drosha	drosha	3
A1002BD031	HD3A1002	HD3100211	1	probe	FBgn0026722	drosha	drosha	3
A1003BD031	HD3A1003	HD3100211	1	probe	FBgn0026722	drosha	drosha	3
A1004BD031	HD3A1004	HD3100211	1	probe	FBgn0026722	drosha	drosha	3
A2001BD031	HD3A2001	HD3100211	1	probe	FBgn0026722	drosha	drosha	3
A2002BD031	HD3A2002	HD3100211	1	probe	FBgn0026722	drosha	drosha	3
A2003BD031	HD3A2003	HD3100211	1	probe	FBgn0026722	drosha	drosha	3
A2004BD031	HD3A2004	HD3100211	1	probe	FBgn0026722	drosha	drosha	3
A1001BD032	HD3A1001	HD3200211	2	probe	FBgn0026722	drosha	drosha	3
A1002BD032	HD3A1002	HD3200211	2	probe	FBgn0026722	drosha	drosha	3
A1003BD032	HD3A1003	HD3200211	2	probe	FBgn0026722	drosha	drosha	3
A1004BD032	HD3A1004	HD3200211	2	probe	FBgn0026722	drosha	drosha	3
A2001BD032	HD3A2001	HD3200211	2	probe	FBgn0026722	drosha	drosha	3
A2002BD032	HD3A2002	HD3200211	2	probe	FBgn0026722	drosha	drosha	3
A2003BD032	HD3A2003	HD3200211	2	probe	FBgn0026722	drosha	drosha	3
A2004BD032	HD3A2004	HD3200211	2	probe	FBgn0026722	drosha	drosha	3
A1001BD033	HD3A1001	HD3100213	1	probe	FBgn0032723	short spindle 3	ssp3	3
A1002BD033	HD3A1002	HD3100213	1	probe	FBgn0032723	short spindle 3	ssp3	3
A1003BD033	HD3A1003	HD3100213	1	probe	FBgn0032723	short spindle 3	ssp3	3
A1004BD033	HD3A1004	HD3100213	1	probe	FBgn0032723	short spindle 3	ssp3	3
A2001BD033	HD3A2001	HD3100213	1	probe	FBgn0032723	short spindle 3	ssp3	3
A2002BD033	HD3A2002	HD3100213	1	probe	FBgn0032723	short spindle 3	ssp3	3
A2003BD033	HD3A2003	HD3100213	1	probe	FBgn0032723	short spindle 3	ssp3	3
A2004BD033	HD3A2004	HD3100213	1	probe	FBgn0032723	short spindle 3	ssp3	3
F2001BD003	HD3A2001	control_fluc	1	control_fluc				3
F2002BD003	HD3A2002	control_fluc	1	control_fluc				3
F2003BD003	HD3A2003	control_fluc	1	control_fluc				3
F2004BD003	HD3A2004	control_fluc	1	control_fluc				3
A1001BD034	HD3A1001	HD3200213	2	probe	FBgn0032723	short spindle 3	ssp3	3
A1002BD034	HD3A1002	HD3200213	2	probe	FBgn0032723	short spindle 3	ssp3	3
A1003BD034	HD3A1003	HD3200213	2	probe	FBgn0032723	short spindle 3	ssp3	3
A1004BD034	HD3A1004	HD3200213	2	probe	FBgn0032723	short spindle 3	ssp3	3
A2001BD034	HD3A2001	HD3200213	2	probe	FBgn0032723	short spindle 3	ssp3	3
A2002BD034	HD3A2002	HD3200213	2	probe	FBgn0032723	short spindle 3	ssp3	3
A2003BD034	HD3A2003	HD3200213	2	probe	FBgn0032723	short spindle 3	ssp3	3
A2004BD034	HD3A2004	HD3200213	2	probe	FBgn0032723	short spindle 3	ssp3	3
A1001BD035	HD3A1001	HD3100223	1	probe	FBgn0040339	Mediator complex subunit 22	MED22	3
A1002BD035	HD3A1002	HD3100223	1	probe	FBgn0040339	Mediator complex subunit 22	MED22	3
A1003BD035	HD3A1003	HD3100223	1	probe	FBgn0040339	Mediator complex subunit 22	MED22	3
A1004BD035	HD3A1004	HD3100223	1	probe	FBgn0040339	Mediator complex subunit 22	MED22	3
A2001BD035	HD3A2001	HD3100223	1	probe	FBgn0040339	Mediator complex subunit 22	MED22	3
A2002BD035	HD3A2002	HD3100223	1	probe	FBgn0040339	Mediator complex subunit 22	MED22	3
A2003BD035	HD3A2003	HD3100223	1	probe	FBgn0040339	Mediator complex subunit 22	MED22	3
A2004BD035	HD3A2004	HD3100223	1	probe	FBgn0040339	Mediator complex subunit 22	MED22	3
A1001BD036	HD3A1001	HD3200223	2	probe	FBgn0040339	Mediator complex subunit 22	MED22	3
A1002BD036	HD3A1002	HD3200223	2	probe	FBgn0040339	Mediator complex subunit 22	MED22	3
A1003BD036	HD3A1003	HD3200223	2	probe	FBgn0040339	Mediator complex subunit 22	MED22	3
A1004BD036	HD3A1004	HD3200223	2	probe	FBgn0040339	Mediator complex subunit 22	MED22	3
A2001BD036	HD3A2001	HD3200223	2	probe	FBgn0040339	Mediator complex subunit 22	MED22	3
A2002BD036	HD3A2002	HD3200223	2	probe	FBgn0040339	Mediator complex subunit 22	MED22	3
A2003BD036	HD3A2003	HD3200223	2	probe	FBgn0040339	Mediator complex subunit 22	MED22	3
A2004BD036	HD3A2004	HD3200223	2	probe	FBgn0040339	Mediator complex subunit 22	MED22	3
A1001BD037	HD3A1001	HD3100271	1	probe	FBgn0037102		CG7172	4
A1002BD037	HD3A1002	HD3100271	1	probe	FBgn0037102		CG7172	4
A1003BD037	HD3A1003	HD3100271	1	probe	FBgn0037102		CG7172	4
A1004BD037	HD3A1004	HD3100271	1	probe	FBgn0037102		CG7172	4
A2001BD037	HD3A2001	HD3100271	1	probe	FBgn0037102		CG7172	4
A2002BD037	HD3A2002	HD3100271	1	probe	FBgn0037102		CG7172	4
A2003BD037	HD3A2003	HD3100271	1	probe	FBgn0037102		CG7172	4
A2004BD037	HD3A2004	HD3100271	1	probe	FBgn0037102		CG7172	4
A1001BD038	HD3A1001	HD3200271	2	probe	FBgn0037102		CG7172	4
A1002BD038	HD3A1002	HD3200271	2	probe	FBgn0037102		CG7172	4
A1003BD038	HD3A1003	HD3200271	2	probe	FBgn0037102		CG7172	4
A1004BD038	HD3A1004	HD3200271	2	probe	FBgn0037102		CG7172	4
A2001BD038	HD3A2001	HD3200271	2	probe	FBgn0037102		CG7172	4
A2002BD038	HD3A2002	HD3200271	2	probe	FBgn0037102		CG7172	4
A2003BD038	HD3A2003	HD3200271	2	probe	FBgn0037102		CG7172	4
A2004BD038	HD3A2004	HD3200271	2	probe	FBgn0037102		CG7172	4
A1001BD039	HD3A1001	HD3100278	1	probe	FBgn0025781	Cell division cycle 16 ortholog	Cdc16	4
A1002BD039	HD3A1002	HD3100278	1	probe	FBgn0025781	Cell division cycle 16 ortholog	Cdc16	4
A1003BD039	HD3A1003	HD3100278	1	probe	FBgn0025781	Cell division cycle 16 ortholog	Cdc16	4
A1004BD039	HD3A1004	HD3100278	1	probe	FBgn0025781	Cell division cycle 16 ortholog	Cdc16	4
A2001BD039	HD3A2001	HD3100278	1	probe	FBgn0025781	Cell division cycle 16 ortholog	Cdc16	4
A2002BD039	HD3A2002	HD3100278	1	probe	FBgn0025781	Cell division cycle 16 ortholog	Cdc16	4
A2003BD039	HD3A2003	HD3100278	1	probe	FBgn0025781	Cell division cycle 16 ortholog	Cdc16	4
A2004BD039	HD3A2004	HD3100278	1	probe	FBgn0025781	Cell division cycle 16 ortholog	Cdc16	4
F1001BD004	HD3A1001	control_fluc	1	control_fluc				4
F1002BD004	HD3A1002	control_fluc	1	control_fluc				4
F1003BD004	HD3A1003	control_fluc	1	control_fluc				4
F1004BD004	HD3A1004	control_fluc	1	control_fluc				4
A1001BD040	HD3A1001	HD3200278	2	probe	FBgn0025781	Cell division cycle 16 ortholog	Cdc16	4
A1002BD040	HD3A1002	HD3200278	2	probe	FBgn0025781	Cell division cycle 16 ortholog	Cdc16	4
A1003BD040	HD3A1003	HD3200278	2	probe	FBgn0025781	Cell division cycle 16 ortholog	Cdc16	4
A1004BD040	HD3A1004	HD3200278	2	probe	FBgn0025781	Cell division cycle 16 ortholog	Cdc16	4
A2001BD040	HD3A2001	HD3200278	2	probe	FBgn0025781	Cell division cycle 16 ortholog	Cdc16	4
A2002BD040	HD3A2002	HD3200278	2	probe	FBgn0025781	Cell division cycle 16 ortholog	Cdc16	4
A2003BD040	HD3A2003	HD3200278	2	probe	FBgn0025781	Cell division cycle 16 ortholog	Cdc16	4
A2004BD040	HD3A2004	HD3200278	2	probe	FBgn0025781	Cell division cycle 16 ortholog	Cdc16	4
A1001BD041	HD3A1001	HD3100280	1	probe	FBgn0030093	dalao	dalao	4
A1002BD041	HD3A1002	HD3100280	1	probe	FBgn0030093	dalao	dalao	4
A1003BD041	HD3A1003	HD3100280	1	probe	FBgn0030093	dalao	dalao	4
A1004BD041	HD3A1004	HD3100280	1	probe	FBgn0030093	dalao	dalao	4
A2001BD041	HD3A2001	HD3100280	1	probe	FBgn0030093	dalao	dalao	4
A2002BD041	HD3A2002	HD3100280	1	probe	FBgn0030093	dalao	dalao	4
A2003BD041	HD3A2003	HD3100280	1	probe	FBgn0030093	dalao	dalao	4
A2004BD041	HD3A2004	HD3100280	1	probe	FBgn0030093	dalao	dalao	4
A1001BD042	HD3A1001	HD3200280	2	probe	FBgn0030093	dalao	dalao	4
A1002BD042	HD3A1002	HD3200280	2	probe	FBgn0030093	dalao	dalao	4
A1003BD042	HD3A1003	HD3200280	2	probe	FBgn0030093	dalao	dalao	4
A1004BD042	HD3A1004	HD3200280	2	probe	FBgn0030093	dalao	dalao	4
A2001BD042	HD3A2001	HD3200280	2	probe	FBgn0030093	dalao	dalao	4
A2002BD042	HD3A2002	HD3200280	2	probe	FBgn0030093	dalao	dalao	4
A2003BD042	HD3A2003	HD3200280	2	probe	FBgn0030093	dalao	dalao	4
A2004BD042	HD3A2004	HD3200280	2	probe	FBgn0030093	dalao	dalao	4
A1001BD043	HD3A1001	HD3100294	1	probe	FBgn0013746	alien	alien	4
A1002BD043	HD3A1002	HD3100294	1	probe	FBgn0013746	alien	alien	4
A1003BD043	HD3A1003	HD3100294	1	probe	FBgn0013746	alien	alien	4
A1004BD043	HD3A1004	HD3100294	1	probe	FBgn0013746	alien	alien	4
A2001BD043	HD3A2001	HD3100294	1	probe	FBgn0013746	alien	alien	4
A2002BD043	HD3A2002	HD3100294	1	probe	FBgn0013746	alien	alien	4
A2003BD043	HD3A2003	HD3100294	1	probe	FBgn0013746	alien	alien	4
A2004BD043	HD3A2004	HD3100294	1	probe	FBgn0013746	alien	alien	4
A1001BD044	HD3A1001	HD3200294	2	probe	FBgn0013746	alien	alien	4
A1002BD044	HD3A1002	HD3200294	2	probe	FBgn0013746	alien	alien	4
A1003BD044	HD3A1003	HD3200294	2	probe	FBgn0013746	alien	alien	4
A1004BD044	HD3A1004	HD3200294	2	probe	FBgn0013746	alien	alien	4
A2001BD044	HD3A2001	HD3200294	2	probe	FBgn0013746	alien	alien	4
A2002BD044	HD3A2002	HD3200294	2	probe	FBgn0013746	alien	alien	4
A2003BD044	HD3A2003	HD3200294	2	probe	FBgn0013746	alien	alien	4
A2004BD044	HD3A2004	HD3200294	2	probe	FBgn0013746	alien	alien	4
A1001BD045	HD3A1001	HD3100295	1	probe	FBgn0028662	Vacuolar H[+] ATPase PPA1 subunit 1	VhaPPA1-1	4
A1002BD045	HD3A1002	HD3100295	1	probe	FBgn0028662	Vacuolar H[+] ATPase PPA1 subunit 1	VhaPPA1-1	4
A1003BD045	HD3A1003	HD3100295	1	probe	FBgn0028662	Vacuolar H[+] ATPase PPA1 subunit 1	VhaPPA1-1	4
A1004BD045	HD3A1004	HD3100295	1	probe	FBgn0028662	Vacuolar H[+] ATPase PPA1 subunit 1	VhaPPA1-1	4
A2001BD045	HD3A2001	HD3100295	1	probe	FBgn0028662	Vacuolar H[+] ATPase PPA1 subunit 1	VhaPPA1-1	4
A2002BD045	HD3A2002	HD3100295	1	probe	FBgn0028662	Vacuolar H[+] ATPase PPA1 subunit 1	VhaPPA1-1	4
A2003BD045	HD3A2003	HD3100295	1	probe	FBgn0028662	Vacuolar H[+] ATPase PPA1 subunit 1	VhaPPA1-1	4
A2004BD045	HD3A2004	HD3100295	1	probe	FBgn0028662	Vacuolar H[+] ATPase PPA1 subunit 1	VhaPPA1-1	4
F2001BD004	HD3A2001	control_fluc	1	control_fluc				4
F2002BD004	HD3A2002	control_fluc	1	control_fluc				4
F2003BD004	HD3A2003	control_fluc	1	control_fluc				4
F2004BD004	HD3A2004	control_fluc	1	control_fluc				4
A1001BD046	HD3A1001	HD3200295	2	probe	FBgn0028662	Vacuolar H[+] ATPase PPA1 subunit 1	VhaPPA1-1	4
A1002BD046	HD3A1002	HD3200295	2	probe	FBgn0028662	Vacuolar H[+] ATPase PPA1 subunit 1	VhaPPA1-1	4
A1003BD046	HD3A1003	HD3200295	2	probe	FBgn0028662	Vacuolar H[+] ATPase PPA1 subunit 1	VhaPPA1-1	4
A1004BD046	HD3A1004	HD3200295	2	probe	FBgn0028662	Vacuolar H[+] ATPase PPA1 subunit 1	VhaPPA1-1	4
A2001BD046	HD3A2001	HD3200295	2	probe	FBgn0028662	Vacuolar H[+] ATPase PPA1 subunit 1	VhaPPA1-1	4
A2002BD046	HD3A2002	HD3200295	2	probe	FBgn0028662	Vacuolar H[+] ATPase PPA1 subunit 1	VhaPPA1-1	4
A2003BD046	HD3A2003	HD3200295	2	probe	FBgn0028662	Vacuolar H[+] ATPase PPA1 subunit 1	VhaPPA1-1	4
A2004BD046	HD3A2004	HD3200295	2	probe	FBgn0028662	Vacuolar H[+] ATPase PPA1 subunit 1	VhaPPA1-1	4
A1001BD047	HD3A1001	HD3100305	1	probe	FBgn0041781	SCAR	SCAR	4
A1002BD047	HD3A1002	HD3100305	1	probe	FBgn0041781	SCAR	SCAR	4
A1003BD047	HD3A1003	HD3100305	1	probe	FBgn0041781	SCAR	SCAR	4
A1004BD047	HD3A1004	HD3100305	1	probe	FBgn0041781	SCAR	SCAR	4
A2001BD047	HD3A2001	HD3100305	1	probe	FBgn0041781	SCAR	SCAR	4
A2002BD047	HD3A2002	HD3100305	1	probe	FBgn0041781	SCAR	SCAR	4
A2003BD047	HD3A2003	HD3100305	1	probe	FBgn0041781	SCAR	SCAR	4
A2004BD047	HD3A2004	HD3100305	1	probe	FBgn0041781	SCAR	SCAR	4
A1001BD048	HD3A1001	HD3200305	2	probe	FBgn0041781	SCAR	SCAR	4
A1002BD048	HD3A1002	HD3200305	2	probe	FBgn0041781	SCAR	SCAR	4
A1003BD048	HD3A1003	HD3200305	2	probe	FBgn0041781	SCAR	SCAR	4
A1004BD048	HD3A1004	HD3200305	2	probe	FBgn0041781	SCAR	SCAR	4
A2001BD048	HD3A2001	HD3200305	2	probe	FBgn0041781	SCAR	SCAR	4
A2002BD048	HD3A2002	HD3200305	2	probe	FBgn0041781	SCAR	SCAR	4
A2003BD048	HD3A2003	HD3200305	2	probe	FBgn0041781	SCAR	SCAR	4
A2004BD048	HD3A2004	HD3200305	2	probe	FBgn0041781	SCAR	SCAR	4
A1001BD049	HD3A1001	HD3100323	1	probe	FBgn0263231	belle	bel	5
A1002BD049	HD3A1002	HD3100323	1	probe	FBgn0263231	belle	bel	5
A1003BD049	HD3A1003	HD3100323	1	probe	FBgn0263231	belle	bel	5
A1004BD049	HD3A1004	HD3100323	1	probe	FBgn0263231	belle	bel	5
A2001BD049	HD3A2001	HD3100323	1	probe	FBgn0263231	belle	bel	5
A2002BD049	HD3A2002	HD3100323	1	probe	FBgn0263231	belle	bel	5
A2003BD049	HD3A2003	HD3100323	1	probe	FBgn0263231	belle	bel	5
A2004BD049	HD3A2004	HD3100323	1	probe	FBgn0263231	belle	bel	5
A1001BD050	HD3A1001	HD3200323	2	probe	FBgn0263231	belle	bel	5
A1002BD050	HD3A1002	HD3200323	2	probe	FBgn0263231	belle	bel	5
A1003BD050	HD3A1003	HD3200323	2	probe	FBgn0263231	belle	bel	5
A1004BD050	HD3A1004	HD3200323	2	probe	FBgn0263231	belle	bel	5
A2001BD050	HD3A2001	HD3200323	2	probe	FBgn0263231	belle	bel	5
A2002BD050	HD3A2002	HD3200323	2	probe	FBgn0263231	belle	bel	5
A2003BD050	HD3A2003	HD3200323	2	probe	FBgn0263231	belle	bel	5
A2004BD050	HD3A2004	HD3200323	2	probe	FBgn0263231	belle	bel	5
A1001BD051	HD3A1001	HD3100331	1	probe	FBgn0261797	Dynein heavy chain 64C	Dhc64C	5
A1002BD051	HD3A1002	HD3100331	1	probe	FBgn0261797	Dynein heavy chain 64C	Dhc64C	5
A1003BD051	HD3A1003	HD3100331	1	probe	FBgn0261797	Dynein heavy chain 64C	Dhc64C	5
A1004BD051	HD3A1004	HD3100331	1	probe	FBgn0261797	Dynein heavy chain 64C	Dhc64C	5
A2001BD051	HD3A2001	HD3100331	1	probe	FBgn0261797	Dynein heavy chain 64C	Dhc64C	5
A2002BD051	HD3A2002	HD3100331	1	probe	FBgn0261797	Dynein heavy chain 64C	Dhc64C	5
A2003BD051	HD3A2003	HD3100331	1	probe	FBgn0261797	Dynein heavy chain 64C	Dhc64C	5
A2004BD051	HD3A2004	HD3100331	1	probe	FBgn0261797	Dynein heavy chain 64C	Dhc64C	5
F1001BD005	HD3A1001	control_fluc	1	control_fluc				5
F1002BD005	HD3A1002	control_fluc	1	control_fluc				5
F1003BD005	HD3A1003	control_fluc	1	control_fluc				5
F1004BD005	HD3A1004	control_fluc	1	control_fluc				5
A1001BD052	HD3A1001	HD3200331	2	probe	FBgn0261797	Dynein heavy chain 64C	Dhc64C	5
A1002BD052	HD3A1002	HD3200331	2	probe	FBgn0261797	Dynein heavy chain 64C	Dhc64C	5
A1003BD052	HD3A1003	HD3200331	2	probe	FBgn0261797	Dynein heavy chain 64C	Dhc64C	5
A1004BD052	HD3A1004	HD3200331	2	probe	FBgn0261797	Dynein heavy chain 64C	Dhc64C	5
A2001BD052	HD3A2001	HD3200331	2	probe	FBgn0261797	Dynein heavy chain 64C	Dhc64C	5
A2002BD052	HD3A2002	HD3200331	2	probe	FBgn0261797	Dynein heavy chain 64C	Dhc64C	5
A2003BD052	HD3A2003	HD3200331	2	probe	FBgn0261797	Dynein heavy chain 64C	Dhc64C	5
A2004BD052	HD3A2004	HD3200331	2	probe	FBgn0261797	Dynein heavy chain 64C	Dhc64C	5
A1001BD053	HD3A1001	HD3100345	1	probe	FBgn0038454		CG10324	5
A1002BD053	HD3A1002	HD3100345	1	probe	FBgn0038454		CG10324	5
A1003BD053	HD3A1003	HD3100345	1	probe	FBgn0038454		CG10324	5
A1004BD053	HD3A1004	HD3100345	1	probe	FBgn0038454		CG10324	5
A2001BD053	HD3A2001	HD3100345	1	probe	FBgn0038454		CG10324	5
A2002BD053	HD3A2002	HD3100345	1	probe	FBgn0038454		CG10324	5
A2003BD053	HD3A2003	HD3100345	1	probe	FBgn0038454		CG10324	5
A2004BD053	HD3A2004	HD3100345	1	probe	FBgn0038454		CG10324	5
A1001BD054	HD3A1001	HD3200345	2	probe	FBgn0038454		CG10324	5
A1002BD054	HD3A1002	HD3200345	2	probe	FBgn0038454		CG10324	5
A1003BD054	HD3A1003	HD3200345	2	probe	FBgn0038454		CG10324	5
A1004BD054	HD3A1004	HD3200345	2	probe	FBgn0038454		CG10324	5
A2001BD054	HD3A2001	HD3200345	2	probe	FBgn0038454		CG10324	5
A2002BD054	HD3A2002	HD3200345	2	probe	FBgn0038454		CG10324	5
A2003BD054	HD3A2003	HD3200345	2	probe	FBgn0038454		CG10324	5
A2004BD054	HD3A2004	HD3200345	2	probe	FBgn0038454		CG10324	5
A1001BD055	HD3A1001	HD3100353	1	probe	FBgn0035769	CTCF	CTCF	5
A1002BD055	HD3A1002	HD3100353	1	probe	FBgn0035769	CTCF	CTCF	5
A1003BD055	HD3A1003	HD3100353	1	probe	FBgn0035769	CTCF	CTCF	5
A1004BD055	HD3A1004	HD3100353	1	probe	FBgn0035769	CTCF	CTCF	5
A2001BD055	HD3A2001	HD3100353	1	probe	FBgn0035769	CTCF	CTCF	5
A2002BD055	HD3A2002	HD3100353	1	probe	FBgn0035769	CTCF	CTCF	5
A2003BD055	HD3A2003	HD3100353	1	probe	FBgn0035769	CTCF	CTCF	5
A2004BD055	HD3A2004	HD3100353	1	probe	FBgn0035769	CTCF	CTCF	5
A1001BD056	HD3A1001	HD3200353	2	probe	FBgn0035769	CTCF	CTCF	5
A1002BD056	HD3A1002	HD3200353	2	probe	FBgn0035769	CTCF	CTCF	5
A1003BD056	HD3A1003	HD3200353	2	probe	FBgn0035769	CTCF	CTCF	5
A1004BD056	HD3A1004	HD3200353	2	probe	FBgn0035769	CTCF	CTCF	5
A2001BD056	HD3A2001	HD3200353	2	probe	FBgn0035769	CTCF	CTCF	5
A2002BD056	HD3A2002	HD3200353	2	probe	FBgn0035769	CTCF	CTCF	5
A2003BD056	HD3A2003	HD3200353	2	probe	FBgn0035769	CTCF	CTCF	5
A2004BD056	HD3A2004	HD3200353	2	probe	FBgn0035769	CTCF	CTCF	5
A1001BD057	HD3A1001	HD3100379	1	probe	FBgn0027948	mini spindles	msps	5
A1002BD057	HD3A1002	HD3100379	1	probe	FBgn0027948	mini spindles	msps	5
A1003BD057	HD3A1003	HD3100379	1	probe	FBgn0027948	mini spindles	msps	5
A1004BD057	HD3A1004	HD3100379	1	probe	FBgn0027948	mini spindles	msps	5
A2001BD057	HD3A2001	HD3100379	1	probe	FBgn0027948	mini spindles	msps	5
A2002BD057	HD3A2002	HD3100379	1	probe	FBgn0027948	mini spindles	msps	5
A2003BD057	HD3A2003	HD3100379	1	probe	FBgn0027948	mini spindles	msps	5
A2004BD057	HD3A2004	HD3100379	1	probe	FBgn0027948	mini spindles	msps	5
F2001BD005	HD3A2001	control_fluc	1	control_fluc				5
F2002BD005	HD3A2002	control_fluc	1	control_fluc				5
F2003BD005	HD3A2003	control_fluc	1	control_fluc				5
F2004BD005	HD3A2004	control_fluc	1	control_fluc				5
A1001BD058	HD3A1001	HD3200379	2	probe	FBgn0027948	mini spindles	msps	5
A1002BD058	HD3A1002	HD3200379	2	probe	FBgn0027948	mini spindles	msps	5
A1003BD058	HD3A1003	HD3200379	2	probe	FBgn0027948	mini spindles	msps	5
A1004BD058	HD3A1004	HD3200379	2	probe	FBgn0027948	mini spindles	msps	5
A2001BD058	HD3A2001	HD3200379	2	probe	FBgn0027948	mini spindles	msps	5
A2002BD058	HD3A2002	HD3200379	2	probe	FBgn0027948	mini spindles	msps	5
A2003BD058	HD3A2003	HD3200379	2	probe	FBgn0027948	mini spindles	msps	5
A2004BD058	HD3A2004	HD3200379	2	probe	FBgn0027948	mini spindles	msps	5
A1001BD059	HD3A1001	HD3100488	1	probe	FBgn0262716	Actin-related protein 3	Arp3	5
A1002BD059	HD3A1002	HD3100488	1	probe	FBgn0262716	Actin-related protein 3	Arp3	5
A1003BD059	HD3A1003	HD3100488	1	probe	FBgn0262716	Actin-related protein 3	Arp3	5
A1004BD059	HD3A1004	HD3100488	1	probe	FBgn0262716	Actin-related protein 3	Arp3	5
A2001BD059	HD3A2001	HD3100488	1	probe	FBgn0262716	Actin-related protein 3	Arp3	5
A2002BD059	HD3A2002	HD3100488	1	probe	FBgn0262716	Actin-related protein 3	Arp3	5
A2003BD059	HD3A2003	HD3100488	1	probe	FBgn0262716	Actin-related protein 3	Arp3	5
A2004BD059	HD3A2004	HD3100488	1	probe	FBgn0262716	Actin-related protein 3	Arp3	5
A1001BD060	HD3A1001	HD3200488	2	probe	FBgn0262716	Actin-related protein 3	Arp3	5
A1002BD060	HD3A1002	HD3200488	2	probe	FBgn0262716	Actin-related protein 3	Arp3	5
A1003BD060	HD3A1003	HD3200488	2	probe	FBgn0262716	Actin-related protein 3	Arp3	5
A1004BD060	HD3A1004	HD3200488	2	probe	FBgn0262716	Actin-related protein 3	Arp3	5
A2001BD060	HD3A2001	HD3200488	2	probe	FBgn0262716	Actin-related protein 3	Arp3	5
A2002BD060	HD3A2002	HD3200488	2	probe	FBgn0262716	Actin-related protein 3	Arp3	5
A2003BD060	HD3A2003	HD3200488	2	probe	FBgn0262716	Actin-related protein 3	Arp3	5
A2004BD060	HD3A2004	HD3200488	2	probe	FBgn0262716	Actin-related protein 3	Arp3	5
A1001BD061	HD3A1001	HD3100492	1	probe	FBgn0261456	hippo	hpo	6
A1002BD061	HD3A1002	HD3100492	1	probe	FBgn0261456	hippo	hpo	6
A1003BD061	HD3A1003	HD3100492	1	probe	FBgn0261456	hippo	hpo	6
A1004BD061	HD3A1004	HD3100492	1	probe	FBgn0261456	hippo	hpo	6
A2001BD061	HD3A2001	HD3100492	1	probe	FBgn0261456	hippo	hpo	6
A2002BD061	HD3A2002	HD3100492	1	probe	FBgn0261456	hippo	hpo	6
A2003BD061	HD3A2003	HD3100492	1	probe	FBgn0261456	hippo	hpo	6
A2004BD061	HD3A2004	HD3100492	1	probe	FBgn0261456	hippo	hpo	6
A1001BD062	HD3A1001	HD3200492	2	probe	FBgn0261456	hippo	hpo	6
A1002BD062	HD3A1002	HD3200492	2	probe	FBgn0261456	hippo	hpo	6
A1003BD062	HD3A1003	HD3200492	2	probe	FBgn0261456	hippo	hpo	6
A1004BD062	HD3A1004	HD3200492	2	probe	FBgn0261456	hippo	hpo	6
A2001BD062	HD3A2001	HD3200492	2	probe	FBgn0261456	hippo	hpo	6
A2002BD062	HD3A2002	HD3200492	2	probe	FBgn0261456	hippo	hpo	6
A2003BD062	HD3A2003	HD3200492	2	probe	FBgn0261456	hippo	hpo	6
A2004BD062	HD3A2004	HD3200492	2	probe	FBgn0261456	hippo	hpo	6
A1001BD063	HD3A1001	HD3100510	1	probe	FBgn0013762	Cyclin-dependent kinase 5	Cdk5	6
A1002BD063	HD3A1002	HD3100510	1	probe	FBgn0013762	Cyclin-dependent kinase 5	Cdk5	6
A1003BD063	HD3A1003	HD3100510	1	probe	FBgn0013762	Cyclin-dependent kinase 5	Cdk5	6
A1004BD063	HD3A1004	HD3100510	1	probe	FBgn0013762	Cyclin-dependent kinase 5	Cdk5	6
A2001BD063	HD3A2001	HD3100510	1	probe	FBgn0013762	Cyclin-dependent kinase 5	Cdk5	6
A2002BD063	HD3A2002	HD3100510	1	probe	FBgn0013762	Cyclin-dependent kinase 5	Cdk5	6
A2003BD063	HD3A2003	HD3100510	1	probe	FBgn0013762	Cyclin-dependent kinase 5	Cdk5	6
A2004BD063	HD3A2004	HD3100510	1	probe	FBgn0013762	Cyclin-dependent kinase 5	Cdk5	6
F1001BD006	HD3A1001	control_fluc	1	control_fluc				6
F1002BD006	HD3A1002	control_fluc	1	control_fluc				6
F1003BD006	HD3A1003	control_fluc	1	control_fluc				6
F1004BD006	HD3A1004	control_fluc	1	control_fluc				6
A1001BD064	HD3A1001	HD3200510	2	probe	FBgn0013762	Cyclin-dependent kinase 5	Cdk5	6
A1002BD064	HD3A1002	HD3200510	2	probe	FBgn0013762	Cyclin-dependent kinase 5	Cdk5	6
A1003BD064	HD3A1003	HD3200510	2	probe	FBgn0013762	Cyclin-dependent kinase 5	Cdk5	6
A1004BD064	HD3A1004	HD3200510	2	probe	FBgn0013762	Cyclin-dependent kinase 5	Cdk5	6
A2001BD064	HD3A2001	HD3200510	2	probe	FBgn0013762	Cyclin-dependent kinase 5	Cdk5	6
A2002BD064	HD3A2002	HD3200510	2	probe	FBgn0013762	Cyclin-dependent kinase 5	Cdk5	6
A2003BD064	HD3A2003	HD3200510	2	probe	FBgn0013762	Cyclin-dependent kinase 5	Cdk5	6
A2004BD064	HD3A2004	HD3200510	2	probe	FBgn0013762	Cyclin-dependent kinase 5	Cdk5	6
A1001BD065	HD3A1001	HD3100512	1	probe	FBgn0004606	Zn finger homeodomain 1	zfh1	6
A1002BD065	HD3A1002	HD3100512	1	probe	FBgn0004606	Zn finger homeodomain 1	zfh1	6
A1003BD065	HD3A1003	HD3100512	1	probe	FBgn0004606	Zn finger homeodomain 1	zfh1	6
A1004BD065	HD3A1004	HD3100512	1	probe	FBgn0004606	Zn finger homeodomain 1	zfh1	6
A2001BD065	HD3A2001	HD3100512	1	probe	FBgn0004606	Zn finger homeodomain 1	zfh1	6
A2002BD065	HD3A2002	HD3100512	1	probe	FBgn0004606	Zn finger homeodomain 1	zfh1	6
A2003BD065	HD3A2003	HD3100512	1	probe	FBgn0004606	Zn finger homeodomain 1	zfh1	6
A2004BD065	HD3A2004	HD3100512	1	probe	FBgn0004606	Zn finger homeodomain 1	zfh1	6
A1001BD066	HD3A1001	HD3200512	2	probe	FBgn0004606	Zn finger homeodomain 1	zfh1	6
A1002BD066	HD3A1002	HD3200512	2	probe	FBgn0004606	Zn finger homeodomain 1	zfh1	6
A1003BD066	HD3A1003	HD3200512	2	probe	FBgn0004606	Zn finger homeodomain 1	zfh1	6
A1004BD066	HD3A1004	HD3200512	2	probe	FBgn0004606	Zn finger homeodomain 1	zfh1	6
A2001BD066	HD3A2001	HD3200512	2	probe	FBgn0004606	Zn finger homeodomain 1	zfh1	6
A2002BD066	HD3A2002	HD3200512	2	probe	FBgn0004606	Zn finger homeodomain 1	zfh1	6
A2003BD066	HD3A2003	HD3200512	2	probe	FBgn0004606	Zn finger homeodomain 1	zfh1	6
A2004BD066	HD3A2004	HD3200512	2	probe	FBgn0004606	Zn finger homeodomain 1	zfh1	6
A1001BD067	HD3A1001	HD3100518	1	probe	FBgn0034310	Nucleoporin 75kD	Nup75	6
A1002BD067	HD3A1002	HD3100518	1	probe	FBgn0034310	Nucleoporin 75kD	Nup75	6
A1003BD067	HD3A1003	HD3100518	1	probe	FBgn0034310	Nucleoporin 75kD	Nup75	6
A1004BD067	HD3A1004	HD3100518	1	probe	FBgn0034310	Nucleoporin 75kD	Nup75	6
A2001BD067	HD3A2001	HD3100518	1	probe	FBgn0034310	Nucleoporin 75kD	Nup75	6
A2002BD067	HD3A2002	HD3100518	1	probe	FBgn0034310	Nucleoporin 75kD	Nup75	6
A2003BD067	HD3A2003	HD3100518	1	probe	FBgn0034310	Nucleoporin 75kD	Nup75	6
A2004BD067	HD3A2004	HD3100518	1	probe	FBgn0034310	Nucleoporin 75kD	Nup75	6
A1001BD068	HD3A1001	HD3200518	2	probe	FBgn0034310	Nucleoporin 75kD	Nup75	6
A1002BD068	HD3A1002	HD3200518	2	probe	FBgn0034310	Nucleoporin 75kD	Nup75	6
A1003BD068	HD3A1003	HD3200518	2	probe	FBgn0034310	Nucleoporin 75kD	Nup75	6
A1004BD068	HD3A1004	HD3200518	2	probe	FBgn0034310	Nucleoporin 75kD	Nup75	6
A2001BD068	HD3A2001	HD3200518	2	probe	FBgn0034310	Nucleoporin 75kD	Nup75	6
A2002BD068	HD3A2002	HD3200518	2	probe	FBgn0034310	Nucleoporin 75kD	Nup75	6
A2003BD068	HD3A2003	HD3200518	2	probe	FBgn0034310	Nucleoporin 75kD	Nup75	6
A2004BD068	HD3A2004	HD3200518	2	probe	FBgn0034310	Nucleoporin 75kD	Nup75	6
A1001BD069	HD3A1001	HD3100520	1	probe	FBgn0015615	Chromosome-associated protein	Cap	6
A1002BD069	HD3A1002	HD3100520	1	probe	FBgn0015615	Chromosome-associated protein	Cap	6
A1003BD069	HD3A1003	HD3100520	1	probe	FBgn0015615	Chromosome-associated protein	Cap	6
A1004BD069	HD3A1004	HD3100520	1	probe	FBgn0015615	Chromosome-associated protein	Cap	6
A2001BD069	HD3A2001	HD3100520	1	probe	FBgn0015615	Chromosome-associated protein	Cap	6
A2002BD069	HD3A2002	HD3100520	1	probe	FBgn0015615	Chromosome-associated protein	Cap	6
A2003BD069	HD3A2003	HD3100520	1	probe	FBgn0015615	Chromosome-associated protein	Cap	6
A2004BD069	HD3A2004	HD3100520	1	probe	FBgn0015615	Chromosome-associated protein	Cap	6
F2001BD006	HD3A2001	control_fluc	1	control_fluc				6
F2002BD006	HD3A2002	control_fluc	1	control_fluc				6
F2003BD006	HD3A2003	control_fluc	1	control_fluc				6
F2004BD006	HD3A2004	control_fluc	1	control_fluc				6
A1001BD070	HD3A1001	HD3200520	2	probe	FBgn0015615	Chromosome-associated protein	Cap	6
A1002BD070	HD3A1002	HD3200520	2	probe	FBgn0015615	Chromosome-associated protein	Cap	6
A1003BD070	HD3A1003	HD3200520	2	probe	FBgn0015615	Chromosome-associated protein	Cap	6
A1004BD070	HD3A1004	HD3200520	2	probe	FBgn0015615	Chromosome-associated protein	Cap	6
A2001BD070	HD3A2001	HD3200520	2	probe	FBgn0015615	Chromosome-associated protein	Cap	6
A2002BD070	HD3A2002	HD3200520	2	probe	FBgn0015615	Chromosome-associated protein	Cap	6
A2003BD070	HD3A2003	HD3200520	2	probe	FBgn0015615	Chromosome-associated protein	Cap	6
A2004BD070	HD3A2004	HD3200520	2	probe	FBgn0015615	Chromosome-associated protein	Cap	6
A1001BD071	HD3A1001	HD3100556	1	probe	FBgn0034299		CG5757	6
A1002BD071	HD3A1002	HD3100556	1	probe	FBgn0034299		CG5757	6
A1003BD071	HD3A1003	HD3100556	1	probe	FBgn0034299		CG5757	6
A1004BD071	HD3A1004	HD3100556	1	probe	FBgn0034299		CG5757	6
A2001BD071	HD3A2001	HD3100556	1	probe	FBgn0034299		CG5757	6
A2002BD071	HD3A2002	HD3100556	1	probe	FBgn0034299		CG5757	6
A2003BD071	HD3A2003	HD3100556	1	probe	FBgn0034299		CG5757	6
A2004BD071	HD3A2004	HD3100556	1	probe	FBgn0034299		CG5757	6
A1001BD072	HD3A1001	HD3200556	2	probe	FBgn0034299		CG5757	6
A1002BD072	HD3A1002	HD3200556	2	probe	FBgn0034299		CG5757	6
A1003BD072	HD3A1003	HD3200556	2	probe	FBgn0034299		CG5757	6
A1004BD072	HD3A1004	HD3200556	2	probe	FBgn0034299		CG5757	6
A2001BD072	HD3A2001	HD3200556	2	probe	FBgn0034299		CG5757	6
A2002BD072	HD3A2002	HD3200556	2	probe	FBgn0034299		CG5757	6
A2003BD072	HD3A2003	HD3200556	2	probe	FBgn0034299		CG5757	6
A2004BD072	HD3A2004	HD3200556	2	probe	FBgn0034299		CG5757	6
A1001BD073	HD3A1001	HD3100563	1	probe	FBgn0031947		CG7154	7
A1002BD073	HD3A1002	HD3100563	1	probe	FBgn0031947		CG7154	7
A1003BD073	HD3A1003	HD3100563	1	probe	FBgn0031947		CG7154	7
A1004BD073	HD3A1004	HD3100563	1	probe	FBgn0031947		CG7154	7
A2001BD073	HD3A2001	HD3100563	1	probe	FBgn0031947		CG7154	7
A2002BD073	HD3A2002	HD3100563	1	probe	FBgn0031947		CG7154	7
A2003BD073	HD3A2003	HD3100563	1	probe	FBgn0031947		CG7154	7
A2004BD073	HD3A2004	HD3100563	1	probe	FBgn0031947		CG7154	7
A1001BD074	HD3A1001	HD3200563	2	probe	FBgn0031947		CG7154	7
A1002BD074	HD3A1002	HD3200563	2	probe	FBgn0031947		CG7154	7
A1003BD074	HD3A1003	HD3200563	2	probe	FBgn0031947		CG7154	7
A1004BD074	HD3A1004	HD3200563	2	probe	FBgn0031947		CG7154	7
A2001BD074	HD3A2001	HD3200563	2	probe	FBgn0031947		CG7154	7
A2002BD074	HD3A2002	HD3200563	2	probe	FBgn0031947		CG7154	7
A2003BD074	HD3A2003	HD3200563	2	probe	FBgn0031947		CG7154	7
A2004BD074	HD3A2004	HD3200563	2	probe	FBgn0031947		CG7154	7
A1001BD107	HD3A1001	HD3100908	1	probe	FBgn0261268	Cullin-3	Cul-3	7
A1002BD107	HD3A1002	HD3100908	1	probe	FBgn0261268	Cullin-3	Cul-3	7
A1003BD107	HD3A1003	HD3100908	1	probe	FBgn0261268	Cullin-3	Cul-3	7
A1004BD107	HD3A1004	HD3100908	1	probe	FBgn0261268	Cullin-3	Cul-3	7
A2001BD107	HD3A2001	HD3100908	1	probe	FBgn0261268	Cullin-3	Cul-3	7
A2002BD107	HD3A2002	HD3100908	1	probe	FBgn0261268	Cullin-3	Cul-3	7
A2003BD107	HD3A2003	HD3100908	1	probe	FBgn0261268	Cullin-3	Cul-3	7
A2004BD107	HD3A2004	HD3100908	1	probe	FBgn0261268	Cullin-3	Cul-3	7
F1001BD007	HD3A1001	control_fluc	1	control_fluc				7
F1002BD007	HD3A1002	control_fluc	1	control_fluc				7
F1003BD007	HD3A1003	control_fluc	1	control_fluc				7
F1004BD007	HD3A1004	control_fluc	1	control_fluc				7
A1001BD108	HD3A1001	HD3200908	2	probe	FBgn0261268	Cullin-3	Cul-3	7
A1002BD108	HD3A1002	HD3200908	2	probe	FBgn0261268	Cullin-3	Cul-3	7
A1003BD108	HD3A1003	HD3200908	2	probe	FBgn0261268	Cullin-3	Cul-3	7
A1004BD108	HD3A1004	HD3200908	2	probe	FBgn0261268	Cullin-3	Cul-3	7
A2001BD108	HD3A2001	HD3200908	2	probe	FBgn0261268	Cullin-3	Cul-3	7
A2002BD108	HD3A2002	HD3200908	2	probe	FBgn0261268	Cullin-3	Cul-3	7
A2003BD108	HD3A2003	HD3200908	2	probe	FBgn0261268	Cullin-3	Cul-3	7
A2004BD108	HD3A2004	HD3200908	2	probe	FBgn0261268	Cullin-3	Cul-3	7
A1001BD075	HD3A1001	HD3100586	1	probe	FBgn0040918	schlank	schlank	7
A1002BD075	HD3A1002	HD3100586	1	probe	FBgn0040918	schlank	schlank	7
A1003BD075	HD3A1003	HD3100586	1	probe	FBgn0040918	schlank	schlank	7
A1004BD075	HD3A1004	HD3100586	1	probe	FBgn0040918	schlank	schlank	7
A2001BD075	HD3A2001	HD3100586	1	probe	FBgn0040918	schlank	schlank	7
A2002BD075	HD3A2002	HD3100586	1	probe	FBgn0040918	schlank	schlank	7
A2003BD075	HD3A2003	HD3100586	1	probe	FBgn0040918	schlank	schlank	7
A2004BD075	HD3A2004	HD3100586	1	probe	FBgn0040918	schlank	schlank	7
A1001BD076	HD3A1001	HD3200586	2	probe	FBgn0040918	schlank	schlank	7
A1002BD076	HD3A1002	HD3200586	2	probe	FBgn0040918	schlank	schlank	7
A1003BD076	HD3A1003	HD3200586	2	probe	FBgn0040918	schlank	schlank	7
A1004BD076	HD3A1004	HD3200586	2	probe	FBgn0040918	schlank	schlank	7
A2001BD076	HD3A2001	HD3200586	2	probe	FBgn0040918	schlank	schlank	7
A2002BD076	HD3A2002	HD3200586	2	probe	FBgn0040918	schlank	schlank	7
A2003BD076	HD3A2003	HD3200586	2	probe	FBgn0040918	schlank	schlank	7
A2004BD076	HD3A2004	HD3200586	2	probe	FBgn0040918	schlank	schlank	7
A1001BD077	HD3A1001	HD3100665	1	probe	FBgn0026262	bip2	bip2	7
A1002BD077	HD3A1002	HD3100665	1	probe	FBgn0026262	bip2	bip2	7
A1003BD077	HD3A1003	HD3100665	1	probe	FBgn0026262	bip2	bip2	7
A1004BD077	HD3A1004	HD3100665	1	probe	FBgn0026262	bip2	bip2	7
A2001BD077	HD3A2001	HD3100665	1	probe	FBgn0026262	bip2	bip2	7
A2002BD077	HD3A2002	HD3100665	1	probe	FBgn0026262	bip2	bip2	7
A2003BD077	HD3A2003	HD3100665	1	probe	FBgn0026262	bip2	bip2	7
A2004BD077	HD3A2004	HD3100665	1	probe	FBgn0026262	bip2	bip2	7
A1001BD078	HD3A1001	HD3200665	2	probe	FBgn0026262	bip2	bip2	7
A1002BD078	HD3A1002	HD3200665	2	probe	FBgn0026262	bip2	bip2	7
A1003BD078	HD3A1003	HD3200665	2	probe	FBgn0026262	bip2	bip2	7
A1004BD078	HD3A1004	HD3200665	2	probe	FBgn0026262	bip2	bip2	7
A2001BD078	HD3A2001	HD3200665	2	probe	FBgn0026262	bip2	bip2	7
A2002BD078	HD3A2002	HD3200665	2	probe	FBgn0026262	bip2	bip2	7
A2003BD078	HD3A2003	HD3200665	2	probe	FBgn0026262	bip2	bip2	7
A2004BD078	HD3A2004	HD3200665	2	probe	FBgn0026262	bip2	bip2	7
A1001BD079	HD3A1001	HD3100672	1	probe	FBgn0039165		CG6204	7
A1002BD079	HD3A1002	HD3100672	1	probe	FBgn0039165		CG6204	7
A1003BD079	HD3A1003	HD3100672	1	probe	FBgn0039165		CG6204	7
A1004BD079	HD3A1004	HD3100672	1	probe	FBgn0039165		CG6204	7
A2001BD079	HD3A2001	HD3100672	1	probe	FBgn0039165		CG6204	7
A2002BD079	HD3A2002	HD3100672	1	probe	FBgn0039165		CG6204	7
A2003BD079	HD3A2003	HD3100672	1	probe	FBgn0039165		CG6204	7
A2004BD079	HD3A2004	HD3100672	1	probe	FBgn0039165		CG6204	7
F2001BD007	HD3A2001	control_fluc	1	control_fluc				7
F2002BD007	HD3A2002	control_fluc	1	control_fluc				7
F2003BD007	HD3A2003	control_fluc	1	control_fluc				7
F2004BD007	HD3A2004	control_fluc	1	control_fluc				7
A1001BD080	HD3A1001	HD3200672	2	probe	FBgn0039165		CG6204	7
A1002BD080	HD3A1002	HD3200672	2	probe	FBgn0039165		CG6204	7
A1003BD080	HD3A1003	HD3200672	2	probe	FBgn0039165		CG6204	7
A1004BD080	HD3A1004	HD3200672	2	probe	FBgn0039165		CG6204	7
A2001BD080	HD3A2001	HD3200672	2	probe	FBgn0039165		CG6204	7
A2002BD080	HD3A2002	HD3200672	2	probe	FBgn0039165		CG6204	7
A2003BD080	HD3A2003	HD3200672	2	probe	FBgn0039165		CG6204	7
A2004BD080	HD3A2004	HD3200672	2	probe	FBgn0039165		CG6204	7
A1001BD081	HD3A1001	HD3100688	1	probe	FBgn0015019	Cctgamma	Cctgamma	7
A1002BD081	HD3A1002	HD3100688	1	probe	FBgn0015019	Cctgamma	Cctgamma	7
A1003BD081	HD3A1003	HD3100688	1	probe	FBgn0015019	Cctgamma	Cctgamma	7
A1004BD081	HD3A1004	HD3100688	1	probe	FBgn0015019	Cctgamma	Cctgamma	7
A2001BD081	HD3A2001	HD3100688	1	probe	FBgn0015019	Cctgamma	Cctgamma	7
A2002BD081	HD3A2002	HD3100688	1	probe	FBgn0015019	Cctgamma	Cctgamma	7
A2003BD081	HD3A2003	HD3100688	1	probe	FBgn0015019	Cctgamma	Cctgamma	7
A2004BD081	HD3A2004	HD3100688	1	probe	FBgn0015019	Cctgamma	Cctgamma	7
A1001BD082	HD3A1001	HD3200688	2	probe	FBgn0015019	Cctgamma	Cctgamma	7
A1002BD082	HD3A1002	HD3200688	2	probe	FBgn0015019	Cctgamma	Cctgamma	7
A1003BD082	HD3A1003	HD3200688	2	probe	FBgn0015019	Cctgamma	Cctgamma	7
A1004BD082	HD3A1004	HD3200688	2	probe	FBgn0015019	Cctgamma	Cctgamma	7
A2001BD082	HD3A2001	HD3200688	2	probe	FBgn0015019	Cctgamma	Cctgamma	7
A2002BD082	HD3A2002	HD3200688	2	probe	FBgn0015019	Cctgamma	Cctgamma	7
A2003BD082	HD3A2003	HD3200688	2	probe	FBgn0015019	Cctgamma	Cctgamma	7
A2004BD082	HD3A2004	HD3200688	2	probe	FBgn0015019	Cctgamma	Cctgamma	7
A1001BD157	HD3A1001	HD3101230	1	probe	FBgn0036277		CG10418	14
A1002BD157	HD3A1002	HD3101230	1	probe	FBgn0036277		CG10418	14
A1003BD157	HD3A1003	HD3101230	1	probe	FBgn0036277		CG10418	14
A1004BD157	HD3A1004	HD3101230	1	probe	FBgn0036277		CG10418	14
A2001BD157	HD3A2001	HD3101230	1	probe	FBgn0036277		CG10418	14
A2002BD157	HD3A2002	HD3101230	1	probe	FBgn0036277		CG10418	14
A2003BD157	HD3A2003	HD3101230	1	probe	FBgn0036277		CG10418	14
A2004BD157	HD3A2004	HD3101230	1	probe	FBgn0036277		CG10418	14
A1001BD158	HD3A1001	HD3201230	2	probe	FBgn0036277		CG10418	14
A1002BD158	HD3A1002	HD3201230	2	probe	FBgn0036277		CG10418	14
A1003BD158	HD3A1003	HD3201230	2	probe	FBgn0036277		CG10418	14
A1004BD158	HD3A1004	HD3201230	2	probe	FBgn0036277		CG10418	14
A2001BD158	HD3A2001	HD3201230	2	probe	FBgn0036277		CG10418	14
A2002BD158	HD3A2002	HD3201230	2	probe	FBgn0036277		CG10418	14
A2003BD158	HD3A2003	HD3201230	2	probe	FBgn0036277		CG10418	14
A2004BD158	HD3A2004	HD3201230	2	probe	FBgn0036277		CG10418	14
A1001BD159	HD3A1001	HD3101235	1	probe	FBgn0026379	Pten	Pten	14
A1002BD159	HD3A1002	HD3101235	1	probe	FBgn0026379	Pten	Pten	14
A1003BD159	HD3A1003	HD3101235	1	probe	FBgn0026379	Pten	Pten	14
A1004BD159	HD3A1004	HD3101235	1	probe	FBgn0026379	Pten	Pten	14
A2001BD159	HD3A2001	HD3101235	1	probe	FBgn0026379	Pten	Pten	14
A2002BD159	HD3A2002	HD3101235	1	probe	FBgn0026379	Pten	Pten	14
A2003BD159	HD3A2003	HD3101235	1	probe	FBgn0026379	Pten	Pten	14
A2004BD159	HD3A2004	HD3101235	1	probe	FBgn0026379	Pten	Pten	14
F1001BD014	HD3A1001	control_fluc	1	control_fluc				14
F1002BD014	HD3A1002	control_fluc	1	control_fluc				14
F1003BD014	HD3A1003	control_fluc	1	control_fluc				14
F1004BD014	HD3A1004	control_fluc	1	control_fluc				14
A1001BD160	HD3A1001	HD3201235	2	probe	FBgn0026379	Pten	Pten	14
A1002BD160	HD3A1002	HD3201235	2	probe	FBgn0026379	Pten	Pten	14
A1003BD160	HD3A1003	HD3201235	2	probe	FBgn0026379	Pten	Pten	14
A1004BD160	HD3A1004	HD3201235	2	probe	FBgn0026379	Pten	Pten	14
A2001BD160	HD3A2001	HD3201235	2	probe	FBgn0026379	Pten	Pten	14
A2002BD160	HD3A2002	HD3201235	2	probe	FBgn0026379	Pten	Pten	14
A2003BD160	HD3A2003	HD3201235	2	probe	FBgn0026379	Pten	Pten	14
A2004BD160	HD3A2004	HD3201235	2	probe	FBgn0026379	Pten	Pten	14
A1001BD161	HD3A1001	HD3101265	1	probe	FBgn0262975	cap-n-collar	cnc	14
A1002BD161	HD3A1002	HD3101265	1	probe	FBgn0262975	cap-n-collar	cnc	14
A1003BD161	HD3A1003	HD3101265	1	probe	FBgn0262975	cap-n-collar	cnc	14
A1004BD161	HD3A1004	HD3101265	1	probe	FBgn0262975	cap-n-collar	cnc	14
A2001BD161	HD3A2001	HD3101265	1	probe	FBgn0262975	cap-n-collar	cnc	14
A2002BD161	HD3A2002	HD3101265	1	probe	FBgn0262975	cap-n-collar	cnc	14
A2003BD161	HD3A2003	HD3101265	1	probe	FBgn0262975	cap-n-collar	cnc	14
A2004BD161	HD3A2004	HD3101265	1	probe	FBgn0262975	cap-n-collar	cnc	14
A1001BD162	HD3A1001	HD3201265	2	probe	FBgn0262975	cap-n-collar	cnc	14
A1002BD162	HD3A1002	HD3201265	2	probe	FBgn0262975	cap-n-collar	cnc	14
A1003BD162	HD3A1003	HD3201265	2	probe	FBgn0262975	cap-n-collar	cnc	14
A1004BD162	HD3A1004	HD3201265	2	probe	FBgn0262975	cap-n-collar	cnc	14
A2001BD162	HD3A2001	HD3201265	2	probe	FBgn0262975	cap-n-collar	cnc	14
A2002BD162	HD3A2002	HD3201265	2	probe	FBgn0262975	cap-n-collar	cnc	14
A2003BD162	HD3A2003	HD3201265	2	probe	FBgn0262975	cap-n-collar	cnc	14
A2004BD162	HD3A2004	HD3201265	2	probe	FBgn0262975	cap-n-collar	cnc	14
A1001BD163	HD3A1001	HD3101275	1	probe	FBgn0001108	Glued	Gl	14
A1002BD163	HD3A1002	HD3101275	1	probe	FBgn0001108	Glued	Gl	14
A1003BD163	HD3A1003	HD3101275	1	probe	FBgn0001108	Glued	Gl	14
A1004BD163	HD3A1004	HD3101275	1	probe	FBgn0001108	Glued	Gl	14
A2001BD163	HD3A2001	HD3101275	1	probe	FBgn0001108	Glued	Gl	14
A2002BD163	HD3A2002	HD3101275	1	probe	FBgn0001108	Glued	Gl	14
A2003BD163	HD3A2003	HD3101275	1	probe	FBgn0001108	Glued	Gl	14
A2004BD163	HD3A2004	HD3101275	1	probe	FBgn0001108	Glued	Gl	14
A1001BD119	HD3A1001	HD3100971	1	probe	FBgn0037981	Spt3	Spt3	14
A1002BD119	HD3A1002	HD3100971	1	probe	FBgn0037981	Spt3	Spt3	14
A1003BD119	HD3A1003	HD3100971	1	probe	FBgn0037981	Spt3	Spt3	14
A1004BD119	HD3A1004	HD3100971	1	probe	FBgn0037981	Spt3	Spt3	14
A2001BD119	HD3A2001	HD3100971	1	probe	FBgn0037981	Spt3	Spt3	14
A2002BD119	HD3A2002	HD3100971	1	probe	FBgn0037981	Spt3	Spt3	14
A2003BD119	HD3A2003	HD3100971	1	probe	FBgn0037981	Spt3	Spt3	14
A2004BD119	HD3A2004	HD3100971	1	probe	FBgn0037981	Spt3	Spt3	14
A1001BD120	HD3A1001	HD3200971	2	probe	FBgn0037981	Spt3	Spt3	14
A1002BD120	HD3A1002	HD3200971	2	probe	FBgn0037981	Spt3	Spt3	14
A1003BD120	HD3A1003	HD3200971	2	probe	FBgn0037981	Spt3	Spt3	14
A1004BD120	HD3A1004	HD3200971	2	probe	FBgn0037981	Spt3	Spt3	14
A2001BD120	HD3A2001	HD3200971	2	probe	FBgn0037981	Spt3	Spt3	14
A2002BD120	HD3A2002	HD3200971	2	probe	FBgn0037981	Spt3	Spt3	14
A2003BD120	HD3A2003	HD3200971	2	probe	FBgn0037981	Spt3	Spt3	14
A2004BD120	HD3A2004	HD3200971	2	probe	FBgn0037981	Spt3	Spt3	14
F2001BD014	HD3A2001	control_fluc	1	control_fluc				14
F2002BD014	HD3A2002	control_fluc	1	control_fluc				14
F2003BD014	HD3A2003	control_fluc	1	control_fluc				14
F2004BD014	HD3A2004	control_fluc	1	control_fluc				14
A1001BD164	HD3A1001	HD3201275	2	probe	FBgn0001108	Glued	Gl	14
A1002BD164	HD3A1002	HD3201275	2	probe	FBgn0001108	Glued	Gl	14
A1003BD164	HD3A1003	HD3201275	2	probe	FBgn0001108	Glued	Gl	14
A1004BD164	HD3A1004	HD3201275	2	probe	FBgn0001108	Glued	Gl	14
A2001BD164	HD3A2001	HD3201275	2	probe	FBgn0001108	Glued	Gl	14
A2002BD164	HD3A2002	HD3201275	2	probe	FBgn0001108	Glued	Gl	14
A2003BD164	HD3A2003	HD3201275	2	probe	FBgn0001108	Glued	Gl	14
A2004BD164	HD3A2004	HD3201275	2	probe	FBgn0001108	Glued	Gl	14
A1001BD165	HD3A1001	HD3101296	1	probe	FBgn0021825	Dynamitin	Dmn	14
A1002BD165	HD3A1002	HD3101296	1	probe	FBgn0021825	Dynamitin	Dmn	14
A1003BD165	HD3A1003	HD3101296	1	probe	FBgn0021825	Dynamitin	Dmn	14
A1004BD165	HD3A1004	HD3101296	1	probe	FBgn0021825	Dynamitin	Dmn	14
A2001BD165	HD3A2001	HD3101296	1	probe	FBgn0021825	Dynamitin	Dmn	14
A2002BD165	HD3A2002	HD3101296	1	probe	FBgn0021825	Dynamitin	Dmn	14
A2003BD165	HD3A2003	HD3101296	1	probe	FBgn0021825	Dynamitin	Dmn	14
A2004BD165	HD3A2004	HD3101296	1	probe	FBgn0021825	Dynamitin	Dmn	14
A1001BD166	HD3A1001	HD3201296	2	probe	FBgn0021825	Dynamitin	Dmn	14
A1002BD166	HD3A1002	HD3201296	2	probe	FBgn0021825	Dynamitin	Dmn	14
A1003BD166	HD3A1003	HD3201296	2	probe	FBgn0021825	Dynamitin	Dmn	14
A1004BD166	HD3A1004	HD3201296	2	probe	FBgn0021825	Dynamitin	Dmn	14
A2001BD166	HD3A2001	HD3201296	2	probe	FBgn0021825	Dynamitin	Dmn	14
A2002BD166	HD3A2002	HD3201296	2	probe	FBgn0021825	Dynamitin	Dmn	14
A2003BD166	HD3A2003	HD3201296	2	probe	FBgn0021825	Dynamitin	Dmn	14
A2004BD166	HD3A2004	HD3201296	2	probe	FBgn0021825	Dynamitin	Dmn	14
A1001BD167	HD3A1001	HD3101327	1	probe	FBgn0014010	Rab5	Rab5	15
A1002BD167	HD3A1002	HD3101327	1	probe	FBgn0014010	Rab5	Rab5	15
A1003BD167	HD3A1003	HD3101327	1	probe	FBgn0014010	Rab5	Rab5	15
A1004BD167	HD3A1004	HD3101327	1	probe	FBgn0014010	Rab5	Rab5	15
A2001BD167	HD3A2001	HD3101327	1	probe	FBgn0014010	Rab5	Rab5	15
A2002BD167	HD3A2002	HD3101327	1	probe	FBgn0014010	Rab5	Rab5	15
A2003BD167	HD3A2003	HD3101327	1	probe	FBgn0014010	Rab5	Rab5	15
A2004BD167	HD3A2004	HD3101327	1	probe	FBgn0014010	Rab5	Rab5	15
A1001BD168	HD3A1001	HD3201327	2	probe	FBgn0014010	Rab5	Rab5	15
A1002BD168	HD3A1002	HD3201327	2	probe	FBgn0014010	Rab5	Rab5	15
A1003BD168	HD3A1003	HD3201327	2	probe	FBgn0014010	Rab5	Rab5	15
A1004BD168	HD3A1004	HD3201327	2	probe	FBgn0014010	Rab5	Rab5	15
A2001BD168	HD3A2001	HD3201327	2	probe	FBgn0014010	Rab5	Rab5	15
A2002BD168	HD3A2002	HD3201327	2	probe	FBgn0014010	Rab5	Rab5	15
A2003BD168	HD3A2003	HD3201327	2	probe	FBgn0014010	Rab5	Rab5	15
A2004BD168	HD3A2004	HD3201327	2	probe	FBgn0014010	Rab5	Rab5	15
A1001BD169	HD3A1001	HD3101337	1	probe	FBgn0026192	par-6	par-6	15
A1002BD169	HD3A1002	HD3101337	1	probe	FBgn0026192	par-6	par-6	15
A1003BD169	HD3A1003	HD3101337	1	probe	FBgn0026192	par-6	par-6	15
A1004BD169	HD3A1004	HD3101337	1	probe	FBgn0026192	par-6	par-6	15
A2001BD169	HD3A2001	HD3101337	1	probe	FBgn0026192	par-6	par-6	15
A2002BD169	HD3A2002	HD3101337	1	probe	FBgn0026192	par-6	par-6	15
A2003BD169	HD3A2003	HD3101337	1	probe	FBgn0026192	par-6	par-6	15
A2004BD169	HD3A2004	HD3101337	1	probe	FBgn0026192	par-6	par-6	15
F1001BD015	HD3A1001	control_fluc	1	control_fluc				15
F1002BD015	HD3A1002	control_fluc	1	control_fluc				15
F1003BD015	HD3A1003	control_fluc	1	control_fluc				15
F1004BD015	HD3A1004	control_fluc	1	control_fluc				15
A1001BD170	HD3A1001	HD3201337	2	probe	FBgn0026192	par-6	par-6	15
A1002BD170	HD3A1002	HD3201337	2	probe	FBgn0026192	par-6	par-6	15
A1003BD170	HD3A1003	HD3201337	2	probe	FBgn0026192	par-6	par-6	15
A1004BD170	HD3A1004	HD3201337	2	probe	FBgn0026192	par-6	par-6	15
A2001BD170	HD3A2001	HD3201337	2	probe	FBgn0026192	par-6	par-6	15
A2002BD170	HD3A2002	HD3201337	2	probe	FBgn0026192	par-6	par-6	15
A2003BD170	HD3A2003	HD3201337	2	probe	FBgn0026192	par-6	par-6	15
A2004BD170	HD3A2004	HD3201337	2	probe	FBgn0026192	par-6	par-6	15
A1001BD171	HD3A1001	HD3101339	1	probe	FBgn0023212	Elongin B	Elongin-B	15
A1002BD171	HD3A1002	HD3101339	1	probe	FBgn0023212	Elongin B	Elongin-B	15
A1003BD171	HD3A1003	HD3101339	1	probe	FBgn0023212	Elongin B	Elongin-B	15
A1004BD171	HD3A1004	HD3101339	1	probe	FBgn0023212	Elongin B	Elongin-B	15
A2001BD171	HD3A2001	HD3101339	1	probe	FBgn0023212	Elongin B	Elongin-B	15
A2002BD171	HD3A2002	HD3101339	1	probe	FBgn0023212	Elongin B	Elongin-B	15
A2003BD171	HD3A2003	HD3101339	1	probe	FBgn0023212	Elongin B	Elongin-B	15
A2004BD171	HD3A2004	HD3101339	1	probe	FBgn0023212	Elongin B	Elongin-B	15
A1001BD172	HD3A1001	HD3201339	2	probe	FBgn0023212	Elongin B	Elongin-B	15
A1002BD172	HD3A1002	HD3201339	2	probe	FBgn0023212	Elongin B	Elongin-B	15
A1003BD172	HD3A1003	HD3201339	2	probe	FBgn0023212	Elongin B	Elongin-B	15
A1004BD172	HD3A1004	HD3201339	2	probe	FBgn0023212	Elongin B	Elongin-B	15
A2001BD172	HD3A2001	HD3201339	2	probe	FBgn0023212	Elongin B	Elongin-B	15
A2002BD172	HD3A2002	HD3201339	2	probe	FBgn0023212	Elongin B	Elongin-B	15
A2003BD172	HD3A2003	HD3201339	2	probe	FBgn0023212	Elongin B	Elongin-B	15
A2004BD172	HD3A2004	HD3201339	2	probe	FBgn0023212	Elongin B	Elongin-B	15
A1001BD173	HD3A1001	HD3101347	1	probe	FBgn0038585		CG7993	15
A1002BD173	HD3A1002	HD3101347	1	probe	FBgn0038585		CG7993	15
A1003BD173	HD3A1003	HD3101347	1	probe	FBgn0038585		CG7993	15
A1004BD173	HD3A1004	HD3101347	1	probe	FBgn0038585		CG7993	15
A2001BD173	HD3A2001	HD3101347	1	probe	FBgn0038585		CG7993	15
A2002BD173	HD3A2002	HD3101347	1	probe	FBgn0038585		CG7993	15
A2003BD173	HD3A2003	HD3101347	1	probe	FBgn0038585		CG7993	15
A2004BD173	HD3A2004	HD3101347	1	probe	FBgn0038585		CG7993	15
A1001BD174	HD3A1001	HD3201347	2	probe	FBgn0038585		CG7993	15
A1002BD174	HD3A1002	HD3201347	2	probe	FBgn0038585		CG7993	15
A1003BD174	HD3A1003	HD3201347	2	probe	FBgn0038585		CG7993	15
A1004BD174	HD3A1004	HD3201347	2	probe	FBgn0038585		CG7993	15
A2001BD174	HD3A2001	HD3201347	2	probe	FBgn0038585		CG7993	15
A2002BD174	HD3A2002	HD3201347	2	probe	FBgn0038585		CG7993	15
A2003BD174	HD3A2003	HD3201347	2	probe	FBgn0038585		CG7993	15
A2004BD174	HD3A2004	HD3201347	2	probe	FBgn0038585		CG7993	15
A1001BD121	HD3A1001	HD3100972	1	probe	FBgn0036516		CG7656	15
A1002BD121	HD3A1002	HD3100972	1	probe	FBgn0036516		CG7656	15
A1003BD121	HD3A1003	HD3100972	1	probe	FBgn0036516		CG7656	15
A1004BD121	HD3A1004	HD3100972	1	probe	FBgn0036516		CG7656	15
A2001BD121	HD3A2001	HD3100972	1	probe	FBgn0036516		CG7656	15
A2002BD121	HD3A2002	HD3100972	1	probe	FBgn0036516		CG7656	15
A2003BD121	HD3A2003	HD3100972	1	probe	FBgn0036516		CG7656	15
A2004BD121	HD3A2004	HD3100972	1	probe	FBgn0036516		CG7656	15
F2001BD015	HD3A2001	control_fluc	1	control_fluc				15
F2002BD015	HD3A2002	control_fluc	1	control_fluc				15
F2003BD015	HD3A2003	control_fluc	1	control_fluc				15
F2004BD015	HD3A2004	control_fluc	1	control_fluc				15
A1001BD122	HD3A1001	HD3200972	2	probe	FBgn0036516		CG7656	15
A1002BD122	HD3A1002	HD3200972	2	probe	FBgn0036516		CG7656	15
A1003BD122	HD3A1003	HD3200972	2	probe	FBgn0036516		CG7656	15
A1004BD122	HD3A1004	HD3200972	2	probe	FBgn0036516		CG7656	15
A2001BD122	HD3A2001	HD3200972	2	probe	FBgn0036516		CG7656	15
A2002BD122	HD3A2002	HD3200972	2	probe	FBgn0036516		CG7656	15
A2003BD122	HD3A2003	HD3200972	2	probe	FBgn0036516		CG7656	15
A2004BD122	HD3A2004	HD3200972	2	probe	FBgn0036516		CG7656	15
A1001BD175	HD3A1001	HD3101352	1	probe	FBgn0037554	DNApol-iota	DNApol-iota	15
A1002BD175	HD3A1002	HD3101352	1	probe	FBgn0037554	DNApol-iota	DNApol-iota	15
A1003BD175	HD3A1003	HD3101352	1	probe	FBgn0037554	DNApol-iota	DNApol-iota	15
A1004BD175	HD3A1004	HD3101352	1	probe	FBgn0037554	DNApol-iota	DNApol-iota	15
A2001BD175	HD3A2001	HD3101352	1	probe	FBgn0037554	DNApol-iota	DNApol-iota	15
A2002BD175	HD3A2002	HD3101352	1	probe	FBgn0037554	DNApol-iota	DNApol-iota	15
A2003BD175	HD3A2003	HD3101352	1	probe	FBgn0037554	DNApol-iota	DNApol-iota	15
A2004BD175	HD3A2004	HD3101352	1	probe	FBgn0037554	DNApol-iota	DNApol-iota	15
A1001BD176	HD3A1001	HD3201352	2	probe	FBgn0037554	DNApol-iota	DNApol-iota	15
A1002BD176	HD3A1002	HD3201352	2	probe	FBgn0037554	DNApol-iota	DNApol-iota	15
A1003BD176	HD3A1003	HD3201352	2	probe	FBgn0037554	DNApol-iota	DNApol-iota	15
A1004BD176	HD3A1004	HD3201352	2	probe	FBgn0037554	DNApol-iota	DNApol-iota	15
A2001BD176	HD3A2001	HD3201352	2	probe	FBgn0037554	DNApol-iota	DNApol-iota	15
A2002BD176	HD3A2002	HD3201352	2	probe	FBgn0037554	DNApol-iota	DNApol-iota	15
A2003BD176	HD3A2003	HD3201352	2	probe	FBgn0037554	DNApol-iota	DNApol-iota	15
A2004BD176	HD3A2004	HD3201352	2	probe	FBgn0037554	DNApol-iota	DNApol-iota	15
A1001BD177	HD3A1001	HD3101399	1	probe	FBgn0001612	lethal (1) discs degenerate 4	l(1)dd4	16
A1002BD177	HD3A1002	HD3101399	1	probe	FBgn0001612	lethal (1) discs degenerate 4	l(1)dd4	16
A1003BD177	HD3A1003	HD3101399	1	probe	FBgn0001612	lethal (1) discs degenerate 4	l(1)dd4	16
A1004BD177	HD3A1004	HD3101399	1	probe	FBgn0001612	lethal (1) discs degenerate 4	l(1)dd4	16
A2001BD177	HD3A2001	HD3101399	1	probe	FBgn0001612	lethal (1) discs degenerate 4	l(1)dd4	16
A2002BD177	HD3A2002	HD3101399	1	probe	FBgn0001612	lethal (1) discs degenerate 4	l(1)dd4	16
A2003BD177	HD3A2003	HD3101399	1	probe	FBgn0001612	lethal (1) discs degenerate 4	l(1)dd4	16
A2004BD177	HD3A2004	HD3101399	1	probe	FBgn0001612	lethal (1) discs degenerate 4	l(1)dd4	16
A1001BD178	HD3A1001	HD3201399	2	probe	FBgn0001612	lethal (1) discs degenerate 4	l(1)dd4	16
A1002BD178	HD3A1002	HD3201399	2	probe	FBgn0001612	lethal (1) discs degenerate 4	l(1)dd4	16
A1003BD178	HD3A1003	HD3201399	2	probe	FBgn0001612	lethal (1) discs degenerate 4	l(1)dd4	16
A1004BD178	HD3A1004	HD3201399	2	probe	FBgn0001612	lethal (1) discs degenerate 4	l(1)dd4	16
A2001BD178	HD3A2001	HD3201399	2	probe	FBgn0001612	lethal (1) discs degenerate 4	l(1)dd4	16
A2002BD178	HD3A2002	HD3201399	2	probe	FBgn0001612	lethal (1) discs degenerate 4	l(1)dd4	16
A2003BD178	HD3A2003	HD3201399	2	probe	FBgn0001612	lethal (1) discs degenerate 4	l(1)dd4	16
A2004BD178	HD3A2004	HD3201399	2	probe	FBgn0001612	lethal (1) discs degenerate 4	l(1)dd4	16
A1001BD179	HD3A1001	HD3101408	1	probe	FBgn0011289	Transcription factor IIA L	TfIIA-L	16
A1002BD179	HD3A1002	HD3101408	1	probe	FBgn0011289	Transcription factor IIA L	TfIIA-L	16
A1003BD179	HD3A1003	HD3101408	1	probe	FBgn0011289	Transcription factor IIA L	TfIIA-L	16
A1004BD179	HD3A1004	HD3101408	1	probe	FBgn0011289	Transcription factor IIA L	TfIIA-L	16
A2001BD179	HD3A2001	HD3101408	1	probe	FBgn0011289	Transcription factor IIA L	TfIIA-L	16
A2002BD179	HD3A2002	HD3101408	1	probe	FBgn0011289	Transcription factor IIA L	TfIIA-L	16
A2003BD179	HD3A2003	HD3101408	1	probe	FBgn0011289	Transcription factor IIA L	TfIIA-L	16
A2004BD179	HD3A2004	HD3101408	1	probe	FBgn0011289	Transcription factor IIA L	TfIIA-L	16
F1001BD016	HD3A1001	control_fluc	1	control_fluc				16
F1002BD016	HD3A1002	control_fluc	1	control_fluc				16
F1003BD016	HD3A1003	control_fluc	1	control_fluc				16
F1004BD016	HD3A1004	control_fluc	1	control_fluc				16
A1001BD180	HD3A1001	HD3201408	2	probe	FBgn0011289	Transcription factor IIA L	TfIIA-L	16
A1002BD180	HD3A1002	HD3201408	2	probe	FBgn0011289	Transcription factor IIA L	TfIIA-L	16
A1003BD180	HD3A1003	HD3201408	2	probe	FBgn0011289	Transcription factor IIA L	TfIIA-L	16
A1004BD180	HD3A1004	HD3201408	2	probe	FBgn0011289	Transcription factor IIA L	TfIIA-L	16
A2001BD180	HD3A2001	HD3201408	2	probe	FBgn0011289	Transcription factor IIA L	TfIIA-L	16
A2002BD180	HD3A2002	HD3201408	2	probe	FBgn0011289	Transcription factor IIA L	TfIIA-L	16
A2003BD180	HD3A2003	HD3201408	2	probe	FBgn0011289	Transcription factor IIA L	TfIIA-L	16
A2004BD180	HD3A2004	HD3201408	2	probe	FBgn0011289	Transcription factor IIA L	TfIIA-L	16
A1001BD181	HD3A1001	HD3101425	1	probe	FBgn0029755	Something about silencing 10 ortholog (S. cerevisiae)	Sas10	16
A1002BD181	HD3A1002	HD3101425	1	probe	FBgn0029755	Something about silencing 10 ortholog (S. cerevisiae)	Sas10	16
A1003BD181	HD3A1003	HD3101425	1	probe	FBgn0029755	Something about silencing 10 ortholog (S. cerevisiae)	Sas10	16
A1004BD181	HD3A1004	HD3101425	1	probe	FBgn0029755	Something about silencing 10 ortholog (S. cerevisiae)	Sas10	16
A2001BD181	HD3A2001	HD3101425	1	probe	FBgn0029755	Something about silencing 10 ortholog (S. cerevisiae)	Sas10	16
A2002BD181	HD3A2002	HD3101425	1	probe	FBgn0029755	Something about silencing 10 ortholog (S. cerevisiae)	Sas10	16
A2003BD181	HD3A2003	HD3101425	1	probe	FBgn0029755	Something about silencing 10 ortholog (S. cerevisiae)	Sas10	16
A2004BD181	HD3A2004	HD3101425	1	probe	FBgn0029755	Something about silencing 10 ortholog (S. cerevisiae)	Sas10	16
A1001BD182	HD3A1001	HD3201425	2	probe	FBgn0029755	Something about silencing 10 ortholog (S. cerevisiae)	Sas10	16
A1002BD182	HD3A1002	HD3201425	2	probe	FBgn0029755	Something about silencing 10 ortholog (S. cerevisiae)	Sas10	16
A1003BD182	HD3A1003	HD3201425	2	probe	FBgn0029755	Something about silencing 10 ortholog (S. cerevisiae)	Sas10	16
A1004BD182	HD3A1004	HD3201425	2	probe	FBgn0029755	Something about silencing 10 ortholog (S. cerevisiae)	Sas10	16
A2001BD182	HD3A2001	HD3201425	2	probe	FBgn0029755	Something about silencing 10 ortholog (S. cerevisiae)	Sas10	16
A2002BD182	HD3A2002	HD3201425	2	probe	FBgn0029755	Something about silencing 10 ortholog (S. cerevisiae)	Sas10	16
A2003BD182	HD3A2003	HD3201425	2	probe	FBgn0029755	Something about silencing 10 ortholog (S. cerevisiae)	Sas10	16
A2004BD182	HD3A2004	HD3201425	2	probe	FBgn0029755	Something about silencing 10 ortholog (S. cerevisiae)	Sas10	16
A1001BD183	HD3A1001	HD3101428	1	probe	FBgn0024196	roadblock	robl	16
A1002BD183	HD3A1002	HD3101428	1	probe	FBgn0024196	roadblock	robl	16
A1003BD183	HD3A1003	HD3101428	1	probe	FBgn0024196	roadblock	robl	16
A1004BD183	HD3A1004	HD3101428	1	probe	FBgn0024196	roadblock	robl	16
A2001BD183	HD3A2001	HD3101428	1	probe	FBgn0024196	roadblock	robl	16
A2002BD183	HD3A2002	HD3101428	1	probe	FBgn0024196	roadblock	robl	16
A2003BD183	HD3A2003	HD3101428	1	probe	FBgn0024196	roadblock	robl	16
A2004BD183	HD3A2004	HD3101428	1	probe	FBgn0024196	roadblock	robl	16
A1001BD184	HD3A1001	HD3201428	2	probe	FBgn0024196	roadblock	robl	16
A1002BD184	HD3A1002	HD3201428	2	probe	FBgn0024196	roadblock	robl	16
A1003BD184	HD3A1003	HD3201428	2	probe	FBgn0024196	roadblock	robl	16
A1004BD184	HD3A1004	HD3201428	2	probe	FBgn0024196	roadblock	robl	16
A2001BD184	HD3A2001	HD3201428	2	probe	FBgn0024196	roadblock	robl	16
A2002BD184	HD3A2002	HD3201428	2	probe	FBgn0024196	roadblock	robl	16
A2003BD184	HD3A2003	HD3201428	2	probe	FBgn0024196	roadblock	robl	16
A2004BD184	HD3A2004	HD3201428	2	probe	FBgn0024196	roadblock	robl	16
A1001BD139	HD3A1001	HD3101169	1	probe	FBgn0030646		CG9203	16
A1002BD139	HD3A1002	HD3101169	1	probe	FBgn0030646		CG9203	16
A1003BD139	HD3A1003	HD3101169	1	probe	FBgn0030646		CG9203	16
A1004BD139	HD3A1004	HD3101169	1	probe	FBgn0030646		CG9203	16
A2001BD139	HD3A2001	HD3101169	1	probe	FBgn0030646		CG9203	16
A2002BD139	HD3A2002	HD3101169	1	probe	FBgn0030646		CG9203	16
A2003BD139	HD3A2003	HD3101169	1	probe	FBgn0030646		CG9203	16
A2004BD139	HD3A2004	HD3101169	1	probe	FBgn0030646		CG9203	16
F2001BD016	HD3A2001	control_fluc	1	control_fluc				16
F2002BD016	HD3A2002	control_fluc	1	control_fluc				16
F2003BD016	HD3A2003	control_fluc	1	control_fluc				16
F2004BD016	HD3A2004	control_fluc	1	control_fluc				16
A1001BD140	HD3A1001	HD3201169	2	probe	FBgn0030646		CG9203	16
A1002BD140	HD3A1002	HD3201169	2	probe	FBgn0030646		CG9203	16
A1003BD140	HD3A1003	HD3201169	2	probe	FBgn0030646		CG9203	16
A1004BD140	HD3A1004	HD3201169	2	probe	FBgn0030646		CG9203	16
A2001BD140	HD3A2001	HD3201169	2	probe	FBgn0030646		CG9203	16
A2002BD140	HD3A2002	HD3201169	2	probe	FBgn0030646		CG9203	16
A2003BD140	HD3A2003	HD3201169	2	probe	FBgn0030646		CG9203	16
A2004BD140	HD3A2004	HD3201169	2	probe	FBgn0030646		CG9203	16
A1001BD185	HD3A1001	HD3101432	1	probe	FBgn0010602	lesswright	lwr	16
A1002BD185	HD3A1002	HD3101432	1	probe	FBgn0010602	lesswright	lwr	16
A1003BD185	HD3A1003	HD3101432	1	probe	FBgn0010602	lesswright	lwr	16
A1004BD185	HD3A1004	HD3101432	1	probe	FBgn0010602	lesswright	lwr	16
A2001BD185	HD3A2001	HD3101432	1	probe	FBgn0010602	lesswright	lwr	16
A2002BD185	HD3A2002	HD3101432	1	probe	FBgn0010602	lesswright	lwr	16
A2003BD185	HD3A2003	HD3101432	1	probe	FBgn0010602	lesswright	lwr	16
A2004BD185	HD3A2004	HD3101432	1	probe	FBgn0010602	lesswright	lwr	16
A1001BD186	HD3A1001	HD3201432	2	probe	FBgn0010602	lesswright	lwr	16
A1002BD186	HD3A1002	HD3201432	2	probe	FBgn0010602	lesswright	lwr	16
A1003BD186	HD3A1003	HD3201432	2	probe	FBgn0010602	lesswright	lwr	16
A1004BD186	HD3A1004	HD3201432	2	probe	FBgn0010602	lesswright	lwr	16
A2001BD186	HD3A2001	HD3201432	2	probe	FBgn0010602	lesswright	lwr	16
A2002BD186	HD3A2002	HD3201432	2	probe	FBgn0010602	lesswright	lwr	16
A2003BD186	HD3A2003	HD3201432	2	probe	FBgn0010602	lesswright	lwr	16
A2004BD186	HD3A2004	HD3201432	2	probe	FBgn0010602	lesswright	lwr	16
A1001BD097	HD3A1001	HD3100856	1	probe	FBgn0034646	Rae1	Rae1	18
A1002BD097	HD3A1002	HD3100856	1	probe	FBgn0034646	Rae1	Rae1	18
A1003BD097	HD3A1003	HD3100856	1	probe	FBgn0034646	Rae1	Rae1	18
A1004BD097	HD3A1004	HD3100856	1	probe	FBgn0034646	Rae1	Rae1	18
A2001BD097	HD3A2001	HD3100856	1	probe	FBgn0034646	Rae1	Rae1	18
A2002BD097	HD3A2002	HD3100856	1	probe	FBgn0034646	Rae1	Rae1	18
A2003BD097	HD3A2003	HD3100856	1	probe	FBgn0034646	Rae1	Rae1	18
A2004BD097	HD3A2004	HD3100856	1	probe	FBgn0034646	Rae1	Rae1	18
A1001BD098	HD3A1001	HD3200856	2	probe	FBgn0034646	Rae1	Rae1	18
A1002BD098	HD3A1002	HD3200856	2	probe	FBgn0034646	Rae1	Rae1	18
A1003BD098	HD3A1003	HD3200856	2	probe	FBgn0034646	Rae1	Rae1	18
A1004BD098	HD3A1004	HD3200856	2	probe	FBgn0034646	Rae1	Rae1	18
A2001BD098	HD3A2001	HD3200856	2	probe	FBgn0034646	Rae1	Rae1	18
A2002BD098	HD3A2002	HD3200856	2	probe	FBgn0034646	Rae1	Rae1	18
A2003BD098	HD3A2003	HD3200856	2	probe	FBgn0034646	Rae1	Rae1	18
A2004BD098	HD3A2004	HD3200856	2	probe	FBgn0034646	Rae1	Rae1	18
A1001BD099	HD3A1001	HD3100861	1	probe	FBgn0026430	gamma-tubulin ring protein 84	Grip84	18
A1002BD099	HD3A1002	HD3100861	1	probe	FBgn0026430	gamma-tubulin ring protein 84	Grip84	18
A1003BD099	HD3A1003	HD3100861	1	probe	FBgn0026430	gamma-tubulin ring protein 84	Grip84	18
A1004BD099	HD3A1004	HD3100861	1	probe	FBgn0026430	gamma-tubulin ring protein 84	Grip84	18
A2001BD099	HD3A2001	HD3100861	1	probe	FBgn0026430	gamma-tubulin ring protein 84	Grip84	18
A2002BD099	HD3A2002	HD3100861	1	probe	FBgn0026430	gamma-tubulin ring protein 84	Grip84	18
A2003BD099	HD3A2003	HD3100861	1	probe	FBgn0026430	gamma-tubulin ring protein 84	Grip84	18
A2004BD099	HD3A2004	HD3100861	1	probe	FBgn0026430	gamma-tubulin ring protein 84	Grip84	18
F1001BD018	HD3A1001	control_fluc	1	control_fluc				18
F1002BD018	HD3A1002	control_fluc	1	control_fluc				18
F1003BD018	HD3A1003	control_fluc	1	control_fluc				18
F1004BD018	HD3A1004	control_fluc	1	control_fluc				18
A1001BD100	HD3A1001	HD3200861	2	probe	FBgn0026430	gamma-tubulin ring protein 84	Grip84	18
A1002BD100	HD3A1002	HD3200861	2	probe	FBgn0026430	gamma-tubulin ring protein 84	Grip84	18
A1003BD100	HD3A1003	HD3200861	2	probe	FBgn0026430	gamma-tubulin ring protein 84	Grip84	18
A1004BD100	HD3A1004	HD3200861	2	probe	FBgn0026430	gamma-tubulin ring protein 84	Grip84	18
A2001BD100	HD3A2001	HD3200861	2	probe	FBgn0026430	gamma-tubulin ring protein 84	Grip84	18
A2002BD100	HD3A2002	HD3200861	2	probe	FBgn0026430	gamma-tubulin ring protein 84	Grip84	18
A2003BD100	HD3A2003	HD3200861	2	probe	FBgn0026430	gamma-tubulin ring protein 84	Grip84	18
A2004BD100	HD3A2004	HD3200861	2	probe	FBgn0026430	gamma-tubulin ring protein 84	Grip84	18
A1001BD101	HD3A1001	HD3100867	1	probe	FBgn0026598	Adenomatous polyposis coli tumor suppressor homolog 2	Apc2	18
A1002BD101	HD3A1002	HD3100867	1	probe	FBgn0026598	Adenomatous polyposis coli tumor suppressor homolog 2	Apc2	18
A1003BD101	HD3A1003	HD3100867	1	probe	FBgn0026598	Adenomatous polyposis coli tumor suppressor homolog 2	Apc2	18
A1004BD101	HD3A1004	HD3100867	1	probe	FBgn0026598	Adenomatous polyposis coli tumor suppressor homolog 2	Apc2	18
A2001BD101	HD3A2001	HD3100867	1	probe	FBgn0026598	Adenomatous polyposis coli tumor suppressor homolog 2	Apc2	18
A2002BD101	HD3A2002	HD3100867	1	probe	FBgn0026598	Adenomatous polyposis coli tumor suppressor homolog 2	Apc2	18
A2003BD101	HD3A2003	HD3100867	1	probe	FBgn0026598	Adenomatous polyposis coli tumor suppressor homolog 2	Apc2	18
A2004BD101	HD3A2004	HD3100867	1	probe	FBgn0026598	Adenomatous polyposis coli tumor suppressor homolog 2	Apc2	18
A1001BD102	HD3A1001	HD3200867	2	probe	FBgn0026598	Adenomatous polyposis coli tumor suppressor homolog 2	Apc2	18
A1002BD102	HD3A1002	HD3200867	2	probe	FBgn0026598	Adenomatous polyposis coli tumor suppressor homolog 2	Apc2	18
A1003BD102	HD3A1003	HD3200867	2	probe	FBgn0026598	Adenomatous polyposis coli tumor suppressor homolog 2	Apc2	18
A1004BD102	HD3A1004	HD3200867	2	probe	FBgn0026598	Adenomatous polyposis coli tumor suppressor homolog 2	Apc2	18
A2001BD102	HD3A2001	HD3200867	2	probe	FBgn0026598	Adenomatous polyposis coli tumor suppressor homolog 2	Apc2	18
A2002BD102	HD3A2002	HD3200867	2	probe	FBgn0026598	Adenomatous polyposis coli tumor suppressor homolog 2	Apc2	18
A2003BD102	HD3A2003	HD3200867	2	probe	FBgn0026598	Adenomatous polyposis coli tumor suppressor homolog 2	Apc2	18
A2004BD102	HD3A2004	HD3200867	2	probe	FBgn0026598	Adenomatous polyposis coli tumor suppressor homolog 2	Apc2	18
A1001BD103	HD3A1001	HD3100890	1	probe	FBgn0263600	DNA-polymerase-delta	DNApol-delta	18
A1002BD103	HD3A1002	HD3100890	1	probe	FBgn0263600	DNA-polymerase-delta	DNApol-delta	18
A1003BD103	HD3A1003	HD3100890	1	probe	FBgn0263600	DNA-polymerase-delta	DNApol-delta	18
A1004BD103	HD3A1004	HD3100890	1	probe	FBgn0263600	DNA-polymerase-delta	DNApol-delta	18
A2001BD103	HD3A2001	HD3100890	1	probe	FBgn0263600	DNA-polymerase-delta	DNApol-delta	18
A2002BD103	HD3A2002	HD3100890	1	probe	FBgn0263600	DNA-polymerase-delta	DNApol-delta	18
A2003BD103	HD3A2003	HD3100890	1	probe	FBgn0263600	DNA-polymerase-delta	DNApol-delta	18
A2004BD103	HD3A2004	HD3100890	1	probe	FBgn0263600	DNA-polymerase-delta	DNApol-delta	18
A1001BD104	HD3A1001	HD3200890	2	probe	FBgn0263600	DNA-polymerase-delta	DNApol-delta	18
A1002BD104	HD3A1002	HD3200890	2	probe	FBgn0263600	DNA-polymerase-delta	DNApol-delta	18
A1003BD104	HD3A1003	HD3200890	2	probe	FBgn0263600	DNA-polymerase-delta	DNApol-delta	18
A1004BD104	HD3A1004	HD3200890	2	probe	FBgn0263600	DNA-polymerase-delta	DNApol-delta	18
A2001BD104	HD3A2001	HD3200890	2	probe	FBgn0263600	DNA-polymerase-delta	DNApol-delta	18
A2002BD104	HD3A2002	HD3200890	2	probe	FBgn0263600	DNA-polymerase-delta	DNApol-delta	18
A2003BD104	HD3A2003	HD3200890	2	probe	FBgn0263600	DNA-polymerase-delta	DNApol-delta	18
A2004BD104	HD3A2004	HD3200890	2	probe	FBgn0263600	DNA-polymerase-delta	DNApol-delta	18
A1001BD263	HD3A1001	HD3100510	1	probe	FBgn0013762	Cyclin-dependent kinase 5	Cdk5	18
A1002BD263	HD3A1002	HD3100510	1	probe	FBgn0013762	Cyclin-dependent kinase 5	Cdk5	18
A1003BD263	HD3A1003	HD3100510	1	probe	FBgn0013762	Cyclin-dependent kinase 5	Cdk5	18
A1004BD263	HD3A1004	HD3100510	1	probe	FBgn0013762	Cyclin-dependent kinase 5	Cdk5	18
A2001BD263	HD3A2001	HD3100510	1	probe	FBgn0013762	Cyclin-dependent kinase 5	Cdk5	18
A2002BD263	HD3A2002	HD3100510	1	probe	FBgn0013762	Cyclin-dependent kinase 5	Cdk5	18
A2003BD263	HD3A2003	HD3100510	1	probe	FBgn0013762	Cyclin-dependent kinase 5	Cdk5	18
A2004BD263	HD3A2004	HD3100510	1	probe	FBgn0013762	Cyclin-dependent kinase 5	Cdk5	18
F2001BD018	HD3A2001	control_fluc	1	control_fluc				18
F2002BD018	HD3A2002	control_fluc	1	control_fluc				18
F2003BD018	HD3A2003	control_fluc	1	control_fluc				18
F2004BD018	HD3A2004	control_fluc	1	control_fluc				18
A1001BD264	HD3A1001	HD3200510	2	probe	FBgn0013762	Cyclin-dependent kinase 5	Cdk5	18
A1002BD264	HD3A1002	HD3200510	2	probe	FBgn0013762	Cyclin-dependent kinase 5	Cdk5	18
A1003BD264	HD3A1003	HD3200510	2	probe	FBgn0013762	Cyclin-dependent kinase 5	Cdk5	18
A1004BD264	HD3A1004	HD3200510	2	probe	FBgn0013762	Cyclin-dependent kinase 5	Cdk5	18
A2001BD264	HD3A2001	HD3200510	2	probe	FBgn0013762	Cyclin-dependent kinase 5	Cdk5	18
A2002BD264	HD3A2002	HD3200510	2	probe	FBgn0013762	Cyclin-dependent kinase 5	Cdk5	18
A2003BD264	HD3A2003	HD3200510	2	probe	FBgn0013762	Cyclin-dependent kinase 5	Cdk5	18
A2004BD264	HD3A2004	HD3200510	2	probe	FBgn0013762	Cyclin-dependent kinase 5	Cdk5	18
A1001BD105	HD3A1001	HD3100907	1	probe	FBgn0027784	Prp18	Prp18	18
A1002BD105	HD3A1002	HD3100907	1	probe	FBgn0027784	Prp18	Prp18	18
A1003BD105	HD3A1003	HD3100907	1	probe	FBgn0027784	Prp18	Prp18	18
A1004BD105	HD3A1004	HD3100907	1	probe	FBgn0027784	Prp18	Prp18	18
A2001BD105	HD3A2001	HD3100907	1	probe	FBgn0027784	Prp18	Prp18	18
A2002BD105	HD3A2002	HD3100907	1	probe	FBgn0027784	Prp18	Prp18	18
A2003BD105	HD3A2003	HD3100907	1	probe	FBgn0027784	Prp18	Prp18	18
A2004BD105	HD3A2004	HD3100907	1	probe	FBgn0027784	Prp18	Prp18	18
A1001BD106	HD3A1001	HD3200907	2	probe	FBgn0027784	Prp18	Prp18	18
A1002BD106	HD3A1002	HD3200907	2	probe	FBgn0027784	Prp18	Prp18	18
A1003BD106	HD3A1003	HD3200907	2	probe	FBgn0027784	Prp18	Prp18	18
A1004BD106	HD3A1004	HD3200907	2	probe	FBgn0027784	Prp18	Prp18	18
A2001BD106	HD3A2001	HD3200907	2	probe	FBgn0027784	Prp18	Prp18	18
A2002BD106	HD3A2002	HD3200907	2	probe	FBgn0027784	Prp18	Prp18	18
A2003BD106	HD3A2003	HD3200907	2	probe	FBgn0027784	Prp18	Prp18	18
A2004BD106	HD3A2004	HD3200907	2	probe	FBgn0027784	Prp18	Prp18	18
A1001BD111	HD3A1001	HD3100934	1	probe	FBgn0037236		Skp2	19
A1002BD111	HD3A1002	HD3100934	1	probe	FBgn0037236		Skp2	19
A1003BD111	HD3A1003	HD3100934	1	probe	FBgn0037236		Skp2	19
A1004BD111	HD3A1004	HD3100934	1	probe	FBgn0037236		Skp2	19
A2001BD111	HD3A2001	HD3100934	1	probe	FBgn0037236		Skp2	19
A2002BD111	HD3A2002	HD3100934	1	probe	FBgn0037236		Skp2	19
A2003BD111	HD3A2003	HD3100934	1	probe	FBgn0037236		Skp2	19
A2004BD111	HD3A2004	HD3100934	1	probe	FBgn0037236		Skp2	19
A1001BD112	HD3A1001	HD3200934	2	probe	FBgn0037236		Skp2	19
A1002BD112	HD3A1002	HD3200934	2	probe	FBgn0037236		Skp2	19
A1003BD112	HD3A1003	HD3200934	2	probe	FBgn0037236		Skp2	19
A1004BD112	HD3A1004	HD3200934	2	probe	FBgn0037236		Skp2	19
A2001BD112	HD3A2001	HD3200934	2	probe	FBgn0037236		Skp2	19
A2002BD112	HD3A2002	HD3200934	2	probe	FBgn0037236		Skp2	19
A2003BD112	HD3A2003	HD3200934	2	probe	FBgn0037236		Skp2	19
A2004BD112	HD3A2004	HD3200934	2	probe	FBgn0037236		Skp2	19
A1001BD113	HD3A1001	HD3100955	1	probe	FBgn0261385	scraps	scra	19
A1002BD113	HD3A1002	HD3100955	1	probe	FBgn0261385	scraps	scra	19
A1003BD113	HD3A1003	HD3100955	1	probe	FBgn0261385	scraps	scra	19
A1004BD113	HD3A1004	HD3100955	1	probe	FBgn0261385	scraps	scra	19
A2001BD113	HD3A2001	HD3100955	1	probe	FBgn0261385	scraps	scra	19
A2002BD113	HD3A2002	HD3100955	1	probe	FBgn0261385	scraps	scra	19
A2003BD113	HD3A2003	HD3100955	1	probe	FBgn0261385	scraps	scra	19
A2004BD113	HD3A2004	HD3100955	1	probe	FBgn0261385	scraps	scra	19
F1001BD019	HD3A1001	control_fluc	1	control_fluc				19
F1002BD019	HD3A1002	control_fluc	1	control_fluc				19
F1003BD019	HD3A1003	control_fluc	1	control_fluc				19
F1004BD019	HD3A1004	control_fluc	1	control_fluc				19
A1001BD114	HD3A1001	HD3200955	2	probe	FBgn0261385	scraps	scra	19
A1002BD114	HD3A1002	HD3200955	2	probe	FBgn0261385	scraps	scra	19
A1003BD114	HD3A1003	HD3200955	2	probe	FBgn0261385	scraps	scra	19
A1004BD114	HD3A1004	HD3200955	2	probe	FBgn0261385	scraps	scra	19
A2001BD114	HD3A2001	HD3200955	2	probe	FBgn0261385	scraps	scra	19
A2002BD114	HD3A2002	HD3200955	2	probe	FBgn0261385	scraps	scra	19
A2003BD114	HD3A2003	HD3200955	2	probe	FBgn0261385	scraps	scra	19
A2004BD114	HD3A2004	HD3200955	2	probe	FBgn0261385	scraps	scra	19
A1001BD187	HD3A1001	HD3101471	1	probe	FBgn0004914	Hepatocyte nuclear factor 4	Hnf4	19
A1002BD187	HD3A1002	HD3101471	1	probe	FBgn0004914	Hepatocyte nuclear factor 4	Hnf4	19
A1003BD187	HD3A1003	HD3101471	1	probe	FBgn0004914	Hepatocyte nuclear factor 4	Hnf4	19
A1004BD187	HD3A1004	HD3101471	1	probe	FBgn0004914	Hepatocyte nuclear factor 4	Hnf4	19
A2001BD187	HD3A2001	HD3101471	1	probe	FBgn0004914	Hepatocyte nuclear factor 4	Hnf4	19
A2002BD187	HD3A2002	HD3101471	1	probe	FBgn0004914	Hepatocyte nuclear factor 4	Hnf4	19
A2003BD187	HD3A2003	HD3101471	1	probe	FBgn0004914	Hepatocyte nuclear factor 4	Hnf4	19
A2004BD187	HD3A2004	HD3101471	1	probe	FBgn0004914	Hepatocyte nuclear factor 4	Hnf4	19
A1001BD188	HD3A1001	HD3201471	2	probe	FBgn0004914	Hepatocyte nuclear factor 4	Hnf4	19
A1002BD188	HD3A1002	HD3201471	2	probe	FBgn0004914	Hepatocyte nuclear factor 4	Hnf4	19
A1003BD188	HD3A1003	HD3201471	2	probe	FBgn0004914	Hepatocyte nuclear factor 4	Hnf4	19
A1004BD188	HD3A1004	HD3201471	2	probe	FBgn0004914	Hepatocyte nuclear factor 4	Hnf4	19
A2001BD188	HD3A2001	HD3201471	2	probe	FBgn0004914	Hepatocyte nuclear factor 4	Hnf4	19
A2002BD188	HD3A2002	HD3201471	2	probe	FBgn0004914	Hepatocyte nuclear factor 4	Hnf4	19
A2003BD188	HD3A2003	HD3201471	2	probe	FBgn0004914	Hepatocyte nuclear factor 4	Hnf4	19
A2004BD188	HD3A2004	HD3201471	2	probe	FBgn0004914	Hepatocyte nuclear factor 4	Hnf4	19
A1001BD189	HD3A1001	HD3101480	1	probe	FBgn0004390	Ras GTPase activating protein 1	RasGAP1	19
A1002BD189	HD3A1002	HD3101480	1	probe	FBgn0004390	Ras GTPase activating protein 1	RasGAP1	19
A1003BD189	HD3A1003	HD3101480	1	probe	FBgn0004390	Ras GTPase activating protein 1	RasGAP1	19
A1004BD189	HD3A1004	HD3101480	1	probe	FBgn0004390	Ras GTPase activating protein 1	RasGAP1	19
A2001BD189	HD3A2001	HD3101480	1	probe	FBgn0004390	Ras GTPase activating protein 1	RasGAP1	19
A2002BD189	HD3A2002	HD3101480	1	probe	FBgn0004390	Ras GTPase activating protein 1	RasGAP1	19
A2003BD189	HD3A2003	HD3101480	1	probe	FBgn0004390	Ras GTPase activating protein 1	RasGAP1	19
A2004BD189	HD3A2004	HD3101480	1	probe	FBgn0004390	Ras GTPase activating protein 1	RasGAP1	19
A1001BD190	HD3A1001	HD3201480	2	probe	FBgn0004390	Ras GTPase activating protein 1	RasGAP1	19
A1002BD190	HD3A1002	HD3201480	2	probe	FBgn0004390	Ras GTPase activating protein 1	RasGAP1	19
A1003BD190	HD3A1003	HD3201480	2	probe	FBgn0004390	Ras GTPase activating protein 1	RasGAP1	19
A1004BD190	HD3A1004	HD3201480	2	probe	FBgn0004390	Ras GTPase activating protein 1	RasGAP1	19
A2001BD190	HD3A2001	HD3201480	2	probe	FBgn0004390	Ras GTPase activating protein 1	RasGAP1	19
A2002BD190	HD3A2002	HD3201480	2	probe	FBgn0004390	Ras GTPase activating protein 1	RasGAP1	19
A2003BD190	HD3A2003	HD3201480	2	probe	FBgn0004390	Ras GTPase activating protein 1	RasGAP1	19
A2004BD190	HD3A2004	HD3201480	2	probe	FBgn0004390	Ras GTPase activating protein 1	RasGAP1	19
A1001BD307	HD3A1001	HD3100908	1	probe	FBgn0261268	Cullin-3	Cul-3	19
A1002BD307	HD3A1002	HD3100908	1	probe	FBgn0261268	Cullin-3	Cul-3	19
A1003BD307	HD3A1003	HD3100908	1	probe	FBgn0261268	Cullin-3	Cul-3	19
A1004BD307	HD3A1004	HD3100908	1	probe	FBgn0261268	Cullin-3	Cul-3	19
A2001BD307	HD3A2001	HD3100908	1	probe	FBgn0261268	Cullin-3	Cul-3	19
A2002BD307	HD3A2002	HD3100908	1	probe	FBgn0261268	Cullin-3	Cul-3	19
A2003BD307	HD3A2003	HD3100908	1	probe	FBgn0261268	Cullin-3	Cul-3	19
A2004BD307	HD3A2004	HD3100908	1	probe	FBgn0261268	Cullin-3	Cul-3	19
F2001BD019	HD3A2001	control_fluc	1	control_fluc				19
F2002BD019	HD3A2002	control_fluc	1	control_fluc				19
F2003BD019	HD3A2003	control_fluc	1	control_fluc				19
F2004BD019	HD3A2004	control_fluc	1	control_fluc				19
A1001BD308	HD3A1001	HD3200908	2	probe	FBgn0261268	Cullin-3	Cul-3	19
A1002BD308	HD3A1002	HD3200908	2	probe	FBgn0261268	Cullin-3	Cul-3	19
A1003BD308	HD3A1003	HD3200908	2	probe	FBgn0261268	Cullin-3	Cul-3	19
A1004BD308	HD3A1004	HD3200908	2	probe	FBgn0261268	Cullin-3	Cul-3	19
A2001BD308	HD3A2001	HD3200908	2	probe	FBgn0261268	Cullin-3	Cul-3	19
A2002BD308	HD3A2002	HD3200908	2	probe	FBgn0261268	Cullin-3	Cul-3	19
A2003BD308	HD3A2003	HD3200908	2	probe	FBgn0261268	Cullin-3	Cul-3	19
A2004BD308	HD3A2004	HD3200908	2	probe	FBgn0261268	Cullin-3	Cul-3	19
A1001BD191	HD3A1001	HD3101483	1	probe	FBgn0020496	C-terminal Binding Protein	CtBP	19
A1002BD191	HD3A1002	HD3101483	1	probe	FBgn0020496	C-terminal Binding Protein	CtBP	19
A1003BD191	HD3A1003	HD3101483	1	probe	FBgn0020496	C-terminal Binding Protein	CtBP	19
A1004BD191	HD3A1004	HD3101483	1	probe	FBgn0020496	C-terminal Binding Protein	CtBP	19
A2001BD191	HD3A2001	HD3101483	1	probe	FBgn0020496	C-terminal Binding Protein	CtBP	19
A2002BD191	HD3A2002	HD3101483	1	probe	FBgn0020496	C-terminal Binding Protein	CtBP	19
A2003BD191	HD3A2003	HD3101483	1	probe	FBgn0020496	C-terminal Binding Protein	CtBP	19
A2004BD191	HD3A2004	HD3101483	1	probe	FBgn0020496	C-terminal Binding Protein	CtBP	19
A1001BD192	HD3A1001	HD3201483	2	probe	FBgn0020496	C-terminal Binding Protein	CtBP	19
A1002BD192	HD3A1002	HD3201483	2	probe	FBgn0020496	C-terminal Binding Protein	CtBP	19
A1003BD192	HD3A1003	HD3201483	2	probe	FBgn0020496	C-terminal Binding Protein	CtBP	19
A1004BD192	HD3A1004	HD3201483	2	probe	FBgn0020496	C-terminal Binding Protein	CtBP	19
A2001BD192	HD3A2001	HD3201483	2	probe	FBgn0020496	C-terminal Binding Protein	CtBP	19
A2002BD192	HD3A2002	HD3201483	2	probe	FBgn0020496	C-terminal Binding Protein	CtBP	19
A2003BD192	HD3A2003	HD3201483	2	probe	FBgn0020496	C-terminal Binding Protein	CtBP	19
A2004BD192	HD3A2004	HD3201483	2	probe	FBgn0020496	C-terminal Binding Protein	CtBP	19
