# Supplementary material for: A map of directional genetic interactions in a metazoan cell
Source: eLife. 2015 Mar 6;4:e05464. doi: 10.7554/eLife.05464 (PMC4384530; doi:10.7554/eLife.05464)
Supplement: Supplementary file 3. — A table of extracted features. DOI: http://dx.doi.org/10.7554/eLife.05464.021 [file elife05464s003.xlsx]

## Sheet: Table_S3_ExtractedFeatures
Supplemental Table S3. Extracted features
ID	systematic feature identifier
Name	feature name as used in the paper
Mag	features extracted from images with 4x or 10x magnification
Summary	function to aggregate single cell features to experiment wide features
Mask	segmentation mask used for feature extraction (nucleus, mitoticNucleus, 10xnucleus, 10xcell)
Channel	feature extracted from fluorescence channel (DAPI, pH3, Tub, and BDAPITub, a scalar product of DAPI channel and Tubulin channel )
Set	grouping of features
Type	Type of feature
Param	Feature specific parameter used
QC	quality control outcome
ID	Name	Mag	Summary	Mask	Channel	Set	Type	Param	QC
4x.count	cell number	4x	nrNuclei	nucleus	DAPI	M			passed
4x.countpH3	number of mitotic objects	4x	nrNuclei	mitoticNuclei	pH3	M			passed
4x.isMitotic	number of mitotic nuclei	4x	nrNuclei	nucleus	DAPI	M			passed
4x.ratioMitotic	mitotic index	4x	mitoticRatio	nucleus	DAPI	M			passed
4x.areaNuc	4x.areaNuc	4x	mean	nucleus	DAPI	M	area		passed
4x.areaNucSD	4x.areaNucSD	4x	stddev	nucleus	DAPI	M	area		passed
4x.areapH3	4x.areapH3	4x	mean	mitoticNuclei	pH3	M	area		passed
4x.areapH3SD	area of mitotic nuclei, stddev	4x	stddev	mitoticNuclei	pH3	M	area		passed
4x.intNuc	4x.intNuc	4x	mean	nucleus	DAPI	M	int		passed
4x.intNucSD	4x.intNucSD	4x	stddev	nucleus	DAPI	M	int		passed
4x.intpH3	4x.intpH3	4x	mean	mitoticNuclei	pH3	M	int		passed
4x.intpH3SD	pH3 intensity, stddev	4x	stddev	mitoticNuclei	pH3	M	int		passed
4x.countAll	4x.countAll	4x	nrNucleiAll	nucleus	DAPI	M			passed
4x.countpH3All	4x.countpH3All	4x	nrNucleiAll	mitoticNuclei	pH3	M			passed
4x.isMitoticAll	4x.isMitoticAll	4x	nrNucleiAll	nucleus	DAPI	M			passed
4x.ratioMitoticAll	4x.ratioMitoticAll	4x	mitoticRatioAll	nucleus	DAPI	M			passed
4x.areaNucAll	area of nuclei	4x	meanAll	nucleus	DAPI	M	area		passed
4x.areaNucSDAll	area of nuclei, stddev	4x	stddevAll	nucleus	DAPI	M	area		passed
4x.areapH3All	area of mitotic nuclei	4x	meanAll	mitoticNuclei	pH3	M	area		passed
4x.areapH3SDAll	4x.areapH3SDAll	4x	stddevAll	mitoticNuclei	pH3	M	area		passed
4x.intNucAll	4x.intNucAll	4x	meanAll	nucleus	DAPI	M	int		passed
4x.intNucSDAll	4x.intNucSDAll	4x	stddevAll	nucleus	DAPI	M	int		passed
4x.intpH3All	4x.intpH3All	4x	meanAll	mitoticNuclei	pH3	M	int		passed
4x.intpH3SDAll	4x.intpH3SDAll	4x	stddevAll	mitoticNuclei	pH3	M	int		passed
4x.LCD1	local cell density 1	4x	LocalCellDensity	nucleus	DAPI	LCD		1	passed
4x.LCD2	local cell density 2	4x	LocalCellDensity	nucleus	DAPI	LCD		2	passed
4x.LCD3	4x.LCD3	4x	LocalCellDensity	nucleus	DAPI	LCD		3	passed
4x.LCD4	4x.LCD4	4x	LocalCellDensity	nucleus	DAPI	LCD		4	passed
4x.LCD5	4x.LCD5	4x	LocalCellDensity	nucleus	DAPI	LCD		5	passed
4x.LCD6	4x.LCD6	4x	LocalCellDensity	nucleus	DAPI	LCD		6	passed
4x.LCD7	4x.LCD7	4x	LocalCellDensity	nucleus	DAPI	LCD		7	passed
4x.LCD8	4x.LCD8	4x	LocalCellDensity	nucleus	DAPI	LCD		8	passed
4x.LCDratio.LCD4	local cell density 3	4x	LCDratio	nucleus	DAPI	LCD		4 / 8	passed
4x.intNucQ0.03	nuclei intensity, 3-percentile	4x	quantile	nucleus	DAPI	Q	int	q0.03	passed
4x.intNucQ0.10	4x.intNucQ0.10	4x	quantile	nucleus	DAPI	Q	int	q0.10	passed
4x.intNucQ0.25	4x.intNucQ0.25	4x	quantile	nucleus	DAPI	Q	int	q0.25	passed
4x.intNucQ0.50	4x.intNucQ0.50	4x	quantile	nucleus	DAPI	Q	int	q0.50	passed
4x.intNucQ0.75	4x.intNucQ0.75	4x	quantile	nucleus	DAPI	Q	int	q0.75	passed
4x.intNucQ0.90	4x.intNucQ0.90	4x	quantile	nucleus	DAPI	Q	int	q0.90	passed
4x.intNucQ0.97	nuclei intensity, 97-percentile	4x	quantile	nucleus	DAPI	Q	int	q0.97	passed
4x.intH3pQ0.03	pH3 intensity, 3-percentile	4x	quantile	mitoticNuclei	pH3	Q	int	q0.03	passed
4x.intH3pQ0.10	4x.intH3pQ0.10	4x	quantile	mitoticNuclei	pH3	Q	int	q0.10	passed
4x.intH3pQ0.25	4x.intH3pQ0.25	4x	quantile	mitoticNuclei	pH3	Q	int	q0.25	passed
4x.intH3pQ0.50	4x.intH3pQ0.50	4x	quantile	mitoticNuclei	pH3	Q	int	q0.50	passed
4x.intH3pQ0.75	4x.intH3pQ0.75	4x	quantile	mitoticNuclei	pH3	Q	int	q0.75	passed
4x.intH3pQ0.90	4x.intH3pQ0.90	4x	quantile	mitoticNuclei	pH3	Q	int	q0.90	passed
4x.intH3pQ0.97	4x.intH3pQ0.97	4x	quantile	mitoticNuclei	pH3	Q	int	q0.97	passed
4x.areaNucQ0.03	area of nuclei, 3-percentile	4x	quantile	nucleus	DAPI	Q	area	q0.03	passed
4x.areaNucQ0.10	area of nuclei, 10-percentile	4x	quantile	nucleus	DAPI	Q	area	q0.10	passed
4x.areaNucQ0.25	area of nuclei, 25-percentile	4x	quantile	nucleus	DAPI	Q	area	q0.25	passed
4x.areaNucQ0.50	area of nuclei, median	4x	quantile	nucleus	DAPI	Q	area	q0.50	passed
4x.areaNucQ0.75	area of nuclei, 75-percentile	4x	quantile	nucleus	DAPI	Q	area	q0.75	passed
4x.areaNucQ0.90	area of nuclei, 90-percentile	4x	quantile	nucleus	DAPI	Q	area	q0.90	passed
4x.areaNucQ0.97	area of nuclei, 97-percentile	4x	quantile	nucleus	DAPI	Q	area	q0.97	passed
4x.intNucH1	4x.intNucH1	4x	histogram	nucleus	DAPI	H	int	1	passed
4x.intNucH2	nuclei intensity, bin 2	4x	histogram	nucleus	DAPI	H	int	2	passed
4x.intNucH3	4x.intNucH3	4x	histogram	nucleus	DAPI	H	int	3	passed
4x.intNucH4	nuclei intensity, bin 4	4x	histogram	nucleus	DAPI	H	int	4	passed
4x.intNucH5	4x.intNucH5	4x	histogram	nucleus	DAPI	H	int	5	passed
4x.intNucH6	4x.intNucH6	4x	histogram	nucleus	DAPI	H	int	6	passed
4x.intNucH7	nuclei intensity, bin 7	4x	histogram	nucleus	DAPI	H	int	7	passed
4x.intNucH8	4x.intNucH8	4x	histogram	nucleus	DAPI	H	int	8	passed
4x.intNucH9	nuclei intensity, bin 9	4x	histogram	nucleus	DAPI	H	int	9	passed
4x.intNucH10	4x.intNucH10	4x	histogram	nucleus	DAPI	H	int	10	passed
4x.intNucH11	4x.intNucH11	4x	histogram	nucleus	DAPI	H	int	11	passed
4x.intNucH12	4x.intNucH12	4x	histogram	nucleus	DAPI	H	int	12	passed
4x.intH3pH1	4x.intH3pH1	4x	histogram	mitoticNuclei	pH3	H	int	1	passed
4x.intH3pH2	pH3 intensity, bin 2	4x	histogram	mitoticNuclei	pH3	H	int	2	passed
4x.intH3pH3	pH3 Intensity, bin 3	4x	histogram	mitoticNuclei	pH3	H	int	3	passed
4x.intH3pH4	pH3 intensity, bin 4	4x	histogram	mitoticNuclei	pH3	H	int	4	passed
4x.intH3pH5	pH3 intensity, bin 5	4x	histogram	mitoticNuclei	pH3	H	int	5	passed
4x.intH3pH6	pH3 intensity, bin 6	4x	histogram	mitoticNuclei	pH3	H	int	6	passed
4x.areaNucH1	area of nuclei, bin 1	4x	histogram	nucleus	DAPI	H	area	1	passed
4x.areaNucH2	area of nuclei, bin 2	4x	histogram	nucleus	DAPI	H	area	2	passed
4x.areaNucH3	area of nuclei, bin 3	4x	histogram	nucleus	DAPI	H	area	3	passed
4x.areaNucH4	area of nuclei, bin 4	4x	histogram	nucleus	DAPI	H	area	4	passed
4x.areaNucH5	4x.areaNucH5	4x	histogram	nucleus	DAPI	H	area	5	passed
4x.areaNucH6	area of nuclei, bin 6	4x	histogram	nucleus	DAPI	H	area	6	passed
4x.areaNucH7	4x.areaNucH7	4x	histogram	nucleus	DAPI	H	area	7	passed
4x.areaNucH8	area of nuclei, bin 8	4x	histogram	nucleus	DAPI	H	area	8	passed
4x.areaNucH9	area of nuclei, bin 9	4x	histogram	nucleus	DAPI	H	area	9	passed
4x.areaNucH10	4x.areaNucH10	4x	histogram	nucleus	DAPI	H	area	10	passed
4x.areaNucH11	area of nuclei, bin 11	4x	histogram	nucleus	DAPI	H	area	11	passed
4x.areaNucH12	4x.areaNucH12	4x	histogram	nucleus	DAPI	H	area	12	passed
10x.meanMitotic.nucleus.0.m.majoraxis	10x.meanMitotic.nucleus.0.m.majoraxis	10x	meanMitotic	10xnucleus	0	m	majoraxis		failed
10x.meanMitotic.nucleus.0.m.eccentricity	10x.meanMitotic.nucleus.0.m.eccentricity	10x	meanMitotic	10xnucleus	0	m	eccentricity		passed
10x.meanMitotic.nucleus.0.s.area	10x.meanMitotic.nucleus.0.s.area	10x	meanMitotic	10xnucleus	0	s	area		passed
10x.meanMitotic.nucleus.0.s.perimeter	10x.meanMitotic.nucleus.0.s.perimeter	10x	meanMitotic	10xnucleus	0	s	perimeter		failed
10x.meanMitotic.nucleus.0.s.radius.mean	10x.meanMitotic.nucleus.0.s.radius.mean	10x	meanMitotic	10xnucleus	0	s	radius	mean	passed
10x.meanMitotic.nucleus.0.s.radius.min	10x.meanMitotic.nucleus.0.s.radius.min	10x	meanMitotic	10xnucleus	0	s	radius	min	passed
10x.meanMitotic.nucleus.0.s.radius.max	10x.meanMitotic.nucleus.0.s.radius.max	10x	meanMitotic	10xnucleus	0	s	radius	max	failed
10x.meanMitotic.nucleus.DAPI.b.mean	10x.meanMitotic.nucleus.DAPI.b.mean	10x	meanMitotic	10xnucleus	DAPI	b	mean		passed
10x.meanMitotic.nucleus.DAPI.b.sd	nuclei intensity, stddev	10x	meanMitotic	10xnucleus	DAPI	b	sd		passed
10x.meanMitotic.nucleus.DAPI.b.mad	10x.meanMitotic.nucleus.DAPI.b.mad	10x	meanMitotic	10xnucleus	DAPI	b	mad		passed
10x.meanMitotic.nucleus.DAPI.b.q001	10x.meanMitotic.nucleus.DAPI.b.q001	10x	meanMitotic	10xnucleus	DAPI	b	q001		passed
10x.meanMitotic.nucleus.DAPI.b.q005	10x.meanMitotic.nucleus.DAPI.b.q005	10x	meanMitotic	10xnucleus	DAPI	b	q005		passed
10x.meanMitotic.nucleus.DAPI.b.q05	10x.meanMitotic.nucleus.DAPI.b.q05	10x	meanMitotic	10xnucleus	DAPI	b	q05		passed
10x.meanMitotic.nucleus.DAPI.b.q095	10x.meanMitotic.nucleus.DAPI.b.q095	10x	meanMitotic	10xnucleus	DAPI	b	q095		passed
10x.meanMitotic.nucleus.DAPI.b.q099	10x.meanMitotic.nucleus.DAPI.b.q099	10x	meanMitotic	10xnucleus	DAPI	b	q099		passed
10x.meanMitotic.nucleus.DAPI.m.majoraxis	10x.meanMitotic.nucleus.DAPI.m.majoraxis	10x	meanMitotic	10xnucleus	DAPI	m	majoraxis		failed
10x.meanMitotic.nucleus.DAPI.m.eccentricity	eccentricity (mitotic nuclei)	10x	meanMitotic	10xnucleus	DAPI	m	eccentricity		passed
10x.meanMitotic.nucleus.DAPI.h.asm.s1	10x.meanMitotic.nucleus.DAPI.h.asm.s1	10x	meanMitotic	10xnucleus	DAPI	h	asm	s1	failed
10x.meanMitotic.nucleus.DAPI.h.con.s1	10x.meanMitotic.nucleus.DAPI.h.con.s1	10x	meanMitotic	10xnucleus	DAPI	h	con	s1	failed
10x.meanMitotic.nucleus.DAPI.h.cor.s1	10x.meanMitotic.nucleus.DAPI.h.cor.s1	10x	meanMitotic	10xnucleus	DAPI	h	cor	s1	failed
10x.meanMitotic.nucleus.DAPI.h.var.s1	10x.meanMitotic.nucleus.DAPI.h.var.s1	10x	meanMitotic	10xnucleus	DAPI	h	var	s1	failed
10x.meanMitotic.nucleus.DAPI.h.idm.s1	10x.meanMitotic.nucleus.DAPI.h.idm.s1	10x	meanMitotic	10xnucleus	DAPI	h	idm	s1	failed
10x.meanMitotic.nucleus.DAPI.h.sav.s1	10x.meanMitotic.nucleus.DAPI.h.sav.s1	10x	meanMitotic	10xnucleus	DAPI	h	sav	s1	failed
10x.meanMitotic.nucleus.DAPI.h.sva.s1	10x.meanMitotic.nucleus.DAPI.h.sva.s1	10x	meanMitotic	10xnucleus	DAPI	h	sva	s1	failed
10x.meanMitotic.nucleus.DAPI.h.sen.s1	10x.meanMitotic.nucleus.DAPI.h.sen.s1	10x	meanMitotic	10xnucleus	DAPI	h	sen	s1	failed
10x.meanMitotic.nucleus.DAPI.h.ent.s1	10x.meanMitotic.nucleus.DAPI.h.ent.s1	10x	meanMitotic	10xnucleus	DAPI	h	ent	s1	failed
10x.meanMitotic.nucleus.DAPI.h.dva.s1	10x.meanMitotic.nucleus.DAPI.h.dva.s1	10x	meanMitotic	10xnucleus	DAPI	h	dva	s1	failed
10x.meanMitotic.nucleus.DAPI.h.den.s1	10x.meanMitotic.nucleus.DAPI.h.den.s1	10x	meanMitotic	10xnucleus	DAPI	h	den	s1	failed
10x.meanMitotic.nucleus.DAPI.h.f12.s1	10x.meanMitotic.nucleus.DAPI.h.f12.s1	10x	meanMitotic	10xnucleus	DAPI	h	f12	s1	failed
10x.meanMitotic.nucleus.DAPI.h.f13.s1	10x.meanMitotic.nucleus.DAPI.h.f13.s1	10x	meanMitotic	10xnucleus	DAPI	h	f13	s1	failed
10x.meanMitotic.nucleus.DAPI.h.asm.s2	10x.meanMitotic.nucleus.DAPI.h.asm.s2	10x	meanMitotic	10xnucleus	DAPI	h	asm	s2	failed
10x.meanMitotic.nucleus.DAPI.h.con.s2	10x.meanMitotic.nucleus.DAPI.h.con.s2	10x	meanMitotic	10xnucleus	DAPI	h	con	s2	failed
10x.meanMitotic.nucleus.DAPI.h.cor.s2	10x.meanMitotic.nucleus.DAPI.h.cor.s2	10x	meanMitotic	10xnucleus	DAPI	h	cor	s2	failed
10x.meanMitotic.nucleus.DAPI.h.var.s2	10x.meanMitotic.nucleus.DAPI.h.var.s2	10x	meanMitotic	10xnucleus	DAPI	h	var	s2	failed
10x.meanMitotic.nucleus.DAPI.h.idm.s2	10x.meanMitotic.nucleus.DAPI.h.idm.s2	10x	meanMitotic	10xnucleus	DAPI	h	idm	s2	failed
10x.meanMitotic.nucleus.DAPI.h.sav.s2	10x.meanMitotic.nucleus.DAPI.h.sav.s2	10x	meanMitotic	10xnucleus	DAPI	h	sav	s2	failed
10x.meanMitotic.nucleus.DAPI.h.sva.s2	10x.meanMitotic.nucleus.DAPI.h.sva.s2	10x	meanMitotic	10xnucleus	DAPI	h	sva	s2	failed
10x.meanMitotic.nucleus.DAPI.h.sen.s2	10x.meanMitotic.nucleus.DAPI.h.sen.s2	10x	meanMitotic	10xnucleus	DAPI	h	sen	s2	failed
10x.meanMitotic.nucleus.DAPI.h.ent.s2	10x.meanMitotic.nucleus.DAPI.h.ent.s2	10x	meanMitotic	10xnucleus	DAPI	h	ent	s2	failed
10x.meanMitotic.nucleus.DAPI.h.dva.s2	10x.meanMitotic.nucleus.DAPI.h.dva.s2	10x	meanMitotic	10xnucleus	DAPI	h	dva	s2	failed
10x.meanMitotic.nucleus.DAPI.h.den.s2	10x.meanMitotic.nucleus.DAPI.h.den.s2	10x	meanMitotic	10xnucleus	DAPI	h	den	s2	failed
10x.meanMitotic.nucleus.DAPI.h.f12.s2	10x.meanMitotic.nucleus.DAPI.h.f12.s2	10x	meanMitotic	10xnucleus	DAPI	h	f12	s2	failed
10x.meanMitotic.nucleus.DAPI.h.f13.s2	10x.meanMitotic.nucleus.DAPI.h.f13.s2	10x	meanMitotic	10xnucleus	DAPI	h	f13	s2	failed
10x.meanMitotic.cell.0.m.majoraxis	10x.meanMitotic.cell.0.m.majoraxis	10x	meanMitotic	10xcell	0	m	majoraxis		passed
10x.meanMitotic.cell.0.m.eccentricity	10x.meanMitotic.cell.0.m.eccentricity	10x	meanMitotic	10xcell	0	m	eccentricity		failed
10x.meanMitotic.cell.0.s.area	10x.meanMitotic.cell.0.s.area	10x	meanMitotic	10xcell	0	s	area		passed
10x.meanMitotic.cell.0.s.perimeter	perimeter	10x	meanMitotic	10xcell	0	s	perimeter		passed
10x.meanMitotic.cell.0.s.radius.mean	10x.meanMitotic.cell.0.s.radius.mean	10x	meanMitotic	10xcell	0	s	radius	mean	passed
10x.meanMitotic.cell.0.s.radius.min	minimum radius	10x	meanMitotic	10xcell	0	s	radius	min	passed
10x.meanMitotic.cell.0.s.radius.max	10x.meanMitotic.cell.0.s.radius.max	10x	meanMitotic	10xcell	0	s	radius	max	passed
10x.meanMitotic.cell.Tub.b.mean	10x.meanMitotic.cell.Tub.b.mean	10x	meanMitotic	10xcell	Tub	b	mean		passed
10x.meanMitotic.cell.Tub.b.sd	tubulin intensity, stddev	10x	meanMitotic	10xcell	Tub	b	sd		passed
10x.meanMitotic.cell.Tub.b.mad	10x.meanMitotic.cell.Tub.b.mad	10x	meanMitotic	10xcell	Tub	b	mad		passed
10x.meanMitotic.cell.Tub.b.q001	10x.meanMitotic.cell.Tub.b.q001	10x	meanMitotic	10xcell	Tub	b	q001		passed
10x.meanMitotic.cell.Tub.b.q005	10x.meanMitotic.cell.Tub.b.q005	10x	meanMitotic	10xcell	Tub	b	q005		passed
10x.meanMitotic.cell.Tub.b.q05	10x.meanMitotic.cell.Tub.b.q05	10x	meanMitotic	10xcell	Tub	b	q05		passed
10x.meanMitotic.cell.Tub.b.q095	10x.meanMitotic.cell.Tub.b.q095	10x	meanMitotic	10xcell	Tub	b	q095		passed
10x.meanMitotic.cell.Tub.b.q099	10x.meanMitotic.cell.Tub.b.q099	10x	meanMitotic	10xcell	Tub	b	q099		passed
10x.meanMitotic.cell.Tub.m.majoraxis	10x.meanMitotic.cell.Tub.m.majoraxis	10x	meanMitotic	10xcell	Tub	m	majoraxis		passed
10x.meanMitotic.cell.Tub.m.eccentricity	10x.meanMitotic.cell.Tub.m.eccentricity	10x	meanMitotic	10xcell	Tub	m	eccentricity		failed
10x.meanMitotic.cell.Tub.h.asm.s1	10x.meanMitotic.cell.Tub.h.asm.s1	10x	meanMitotic	10xcell	Tub	h	asm	s1	failed
10x.meanMitotic.cell.Tub.h.con.s1	10x.meanMitotic.cell.Tub.h.con.s1	10x	meanMitotic	10xcell	Tub	h	con	s1	failed
10x.meanMitotic.cell.Tub.h.cor.s1	10x.meanMitotic.cell.Tub.h.cor.s1	10x	meanMitotic	10xcell	Tub	h	cor	s1	failed
10x.meanMitotic.cell.Tub.h.var.s1	10x.meanMitotic.cell.Tub.h.var.s1	10x	meanMitotic	10xcell	Tub	h	var	s1	failed
10x.meanMitotic.cell.Tub.h.idm.s1	10x.meanMitotic.cell.Tub.h.idm.s1	10x	meanMitotic	10xcell	Tub	h	idm	s1	failed
10x.meanMitotic.cell.Tub.h.sav.s1	10x.meanMitotic.cell.Tub.h.sav.s1	10x	meanMitotic	10xcell	Tub	h	sav	s1	failed
10x.meanMitotic.cell.Tub.h.sva.s1	10x.meanMitotic.cell.Tub.h.sva.s1	10x	meanMitotic	10xcell	Tub	h	sva	s1	failed
10x.meanMitotic.cell.Tub.h.sen.s1	10x.meanMitotic.cell.Tub.h.sen.s1	10x	meanMitotic	10xcell	Tub	h	sen	s1	failed
10x.meanMitotic.cell.Tub.h.ent.s1	10x.meanMitotic.cell.Tub.h.ent.s1	10x	meanMitotic	10xcell	Tub	h	ent	s1	failed
10x.meanMitotic.cell.Tub.h.dva.s1	10x.meanMitotic.cell.Tub.h.dva.s1	10x	meanMitotic	10xcell	Tub	h	dva	s1	failed
10x.meanMitotic.cell.Tub.h.den.s1	10x.meanMitotic.cell.Tub.h.den.s1	10x	meanMitotic	10xcell	Tub	h	den	s1	failed
10x.meanMitotic.cell.Tub.h.f12.s1	10x.meanMitotic.cell.Tub.h.f12.s1	10x	meanMitotic	10xcell	Tub	h	f12	s1	failed
10x.meanMitotic.cell.Tub.h.f13.s1	10x.meanMitotic.cell.Tub.h.f13.s1	10x	meanMitotic	10xcell	Tub	h	f13	s1	failed
10x.meanMitotic.cell.Tub.h.asm.s2	10x.meanMitotic.cell.Tub.h.asm.s2	10x	meanMitotic	10xcell	Tub	h	asm	s2	failed
10x.meanMitotic.cell.Tub.h.con.s2	10x.meanMitotic.cell.Tub.h.con.s2	10x	meanMitotic	10xcell	Tub	h	con	s2	failed
10x.meanMitotic.cell.Tub.h.cor.s2	10x.meanMitotic.cell.Tub.h.cor.s2	10x	meanMitotic	10xcell	Tub	h	cor	s2	failed
10x.meanMitotic.cell.Tub.h.var.s2	10x.meanMitotic.cell.Tub.h.var.s2	10x	meanMitotic	10xcell	Tub	h	var	s2	failed
10x.meanMitotic.cell.Tub.h.idm.s2	10x.meanMitotic.cell.Tub.h.idm.s2	10x	meanMitotic	10xcell	Tub	h	idm	s2	failed
10x.meanMitotic.cell.Tub.h.sav.s2	10x.meanMitotic.cell.Tub.h.sav.s2	10x	meanMitotic	10xcell	Tub	h	sav	s2	failed
10x.meanMitotic.cell.Tub.h.sva.s2	10x.meanMitotic.cell.Tub.h.sva.s2	10x	meanMitotic	10xcell	Tub	h	sva	s2	failed
10x.meanMitotic.cell.Tub.h.sen.s2	10x.meanMitotic.cell.Tub.h.sen.s2	10x	meanMitotic	10xcell	Tub	h	sen	s2	failed
10x.meanMitotic.cell.Tub.h.ent.s2	10x.meanMitotic.cell.Tub.h.ent.s2	10x	meanMitotic	10xcell	Tub	h	ent	s2	failed
10x.meanMitotic.cell.Tub.h.dva.s2	10x.meanMitotic.cell.Tub.h.dva.s2	10x	meanMitotic	10xcell	Tub	h	dva	s2	failed
10x.meanMitotic.cell.Tub.h.den.s2	10x.meanMitotic.cell.Tub.h.den.s2	10x	meanMitotic	10xcell	Tub	h	den	s2	failed
10x.meanMitotic.cell.Tub.h.f12.s2	10x.meanMitotic.cell.Tub.h.f12.s2	10x	meanMitotic	10xcell	Tub	h	f12	s2	failed
10x.meanMitotic.cell.Tub.h.f13.s2	10x.meanMitotic.cell.Tub.h.f13.s2	10x	meanMitotic	10xcell	Tub	h	f13	s2	failed
10x.meanMitotic.cell.BDAPITub.b.mean	10x.meanMitotic.cell.BDAPITub.b.mean	10x	meanMitotic	10xcell	BDAPITub	b	mean		passed
10x.meanMitotic.cell.BDAPITub.b.sd	10x.meanMitotic.cell.BDAPITub.b.sd	10x	meanMitotic	10xcell	BDAPITub	b	sd		passed
10x.meanMitotic.cell.BDAPITub.b.mad	10x.meanMitotic.cell.BDAPITub.b.mad	10x	meanMitotic	10xcell	BDAPITub	b	mad		passed
10x.meanMitotic.cell.BDAPITub.b.q001	10x.meanMitotic.cell.BDAPITub.b.q001	10x	meanMitotic	10xcell	BDAPITub	b	q001		passed
10x.meanMitotic.cell.BDAPITub.b.q005	10x.meanMitotic.cell.BDAPITub.b.q005	10x	meanMitotic	10xcell	BDAPITub	b	q005		passed
10x.meanMitotic.cell.BDAPITub.b.q05	10x.meanMitotic.cell.BDAPITub.b.q05	10x	meanMitotic	10xcell	BDAPITub	b	q05		passed
10x.meanMitotic.cell.BDAPITub.b.q095	10x.meanMitotic.cell.BDAPITub.b.q095	10x	meanMitotic	10xcell	BDAPITub	b	q095		passed
10x.meanMitotic.cell.BDAPITub.b.q099	10x.meanMitotic.cell.BDAPITub.b.q099	10x	meanMitotic	10xcell	BDAPITub	b	q099		passed
10x.meanMitotic.cell.BDAPITub.m.majoraxis	10x.meanMitotic.cell.BDAPITub.m.majoraxis	10x	meanMitotic	10xcell	BDAPITub	m	majoraxis		failed
10x.meanMitotic.cell.BDAPITub.m.eccentricity	10x.meanMitotic.cell.BDAPITub.m.eccentricity	10x	meanMitotic	10xcell	BDAPITub	m	eccentricity		failed
10x.meanMitotic.cell.BDAPITub.h.asm.s1	10x.meanMitotic.cell.BDAPITub.h.asm.s1	10x	meanMitotic	10xcell	BDAPITub	h	asm	s1	failed
10x.meanMitotic.cell.BDAPITub.h.con.s1	10x.meanMitotic.cell.BDAPITub.h.con.s1	10x	meanMitotic	10xcell	BDAPITub	h	con	s1	failed
10x.meanMitotic.cell.BDAPITub.h.cor.s1	10x.meanMitotic.cell.BDAPITub.h.cor.s1	10x	meanMitotic	10xcell	BDAPITub	h	cor	s1	failed
10x.meanMitotic.cell.BDAPITub.h.var.s1	10x.meanMitotic.cell.BDAPITub.h.var.s1	10x	meanMitotic	10xcell	BDAPITub	h	var	s1	failed
10x.meanMitotic.cell.BDAPITub.h.idm.s1	10x.meanMitotic.cell.BDAPITub.h.idm.s1	10x	meanMitotic	10xcell	BDAPITub	h	idm	s1	failed
10x.meanMitotic.cell.BDAPITub.h.sav.s1	10x.meanMitotic.cell.BDAPITub.h.sav.s1	10x	meanMitotic	10xcell	BDAPITub	h	sav	s1	failed
10x.meanMitotic.cell.BDAPITub.h.sva.s1	10x.meanMitotic.cell.BDAPITub.h.sva.s1	10x	meanMitotic	10xcell	BDAPITub	h	sva	s1	failed
10x.meanMitotic.cell.BDAPITub.h.sen.s1	10x.meanMitotic.cell.BDAPITub.h.sen.s1	10x	meanMitotic	10xcell	BDAPITub	h	sen	s1	failed
10x.meanMitotic.cell.BDAPITub.h.ent.s1	10x.meanMitotic.cell.BDAPITub.h.ent.s1	10x	meanMitotic	10xcell	BDAPITub	h	ent	s1	failed
10x.meanMitotic.cell.BDAPITub.h.dva.s1	10x.meanMitotic.cell.BDAPITub.h.dva.s1	10x	meanMitotic	10xcell	BDAPITub	h	dva	s1	failed
10x.meanMitotic.cell.BDAPITub.h.den.s1	10x.meanMitotic.cell.BDAPITub.h.den.s1	10x	meanMitotic	10xcell	BDAPITub	h	den	s1	failed
10x.meanMitotic.cell.BDAPITub.h.f12.s1	10x.meanMitotic.cell.BDAPITub.h.f12.s1	10x	meanMitotic	10xcell	BDAPITub	h	f12	s1	failed
10x.meanMitotic.cell.BDAPITub.h.f13.s1	10x.meanMitotic.cell.BDAPITub.h.f13.s1	10x	meanMitotic	10xcell	BDAPITub	h	f13	s1	failed
10x.meanMitotic.cell.BDAPITub.h.asm.s2	10x.meanMitotic.cell.BDAPITub.h.asm.s2	10x	meanMitotic	10xcell	BDAPITub	h	asm	s2	failed
10x.meanMitotic.cell.BDAPITub.h.con.s2	10x.meanMitotic.cell.BDAPITub.h.con.s2	10x	meanMitotic	10xcell	BDAPITub	h	con	s2	failed
10x.meanMitotic.cell.BDAPITub.h.cor.s2	10x.meanMitotic.cell.BDAPITub.h.cor.s2	10x	meanMitotic	10xcell	BDAPITub	h	cor	s2	failed
10x.meanMitotic.cell.BDAPITub.h.var.s2	10x.meanMitotic.cell.BDAPITub.h.var.s2	10x	meanMitotic	10xcell	BDAPITub	h	var	s2	failed
10x.meanMitotic.cell.BDAPITub.h.idm.s2	10x.meanMitotic.cell.BDAPITub.h.idm.s2	10x	meanMitotic	10xcell	BDAPITub	h	idm	s2	failed
10x.meanMitotic.cell.BDAPITub.h.sav.s2	10x.meanMitotic.cell.BDAPITub.h.sav.s2	10x	meanMitotic	10xcell	BDAPITub	h	sav	s2	failed
10x.meanMitotic.cell.BDAPITub.h.sva.s2	10x.meanMitotic.cell.BDAPITub.h.sva.s2	10x	meanMitotic	10xcell	BDAPITub	h	sva	s2	failed
10x.meanMitotic.cell.BDAPITub.h.sen.s2	10x.meanMitotic.cell.BDAPITub.h.sen.s2	10x	meanMitotic	10xcell	BDAPITub	h	sen	s2	failed
10x.meanMitotic.cell.BDAPITub.h.ent.s2	10x.meanMitotic.cell.BDAPITub.h.ent.s2	10x	meanMitotic	10xcell	BDAPITub	h	ent	s2	failed
10x.meanMitotic.cell.BDAPITub.h.dva.s2	10x.meanMitotic.cell.BDAPITub.h.dva.s2	10x	meanMitotic	10xcell	BDAPITub	h	dva	s2	failed
10x.meanMitotic.cell.BDAPITub.h.den.s2	10x.meanMitotic.cell.BDAPITub.h.den.s2	10x	meanMitotic	10xcell	BDAPITub	h	den	s2	failed
10x.meanMitotic.cell.BDAPITub.h.f12.s2	10x.meanMitotic.cell.BDAPITub.h.f12.s2	10x	meanMitotic	10xcell	BDAPITub	h	f12	s2	failed
10x.meanMitotic.cell.BDAPITub.h.f13.s2	10x.meanMitotic.cell.BDAPITub.h.f13.s2	10x	meanMitotic	10xcell	BDAPITub	h	f13	s2	failed
10x.meanNonmitotic.nucleus.0.m.majoraxis	10x.meanNonmitotic.nucleus.0.m.majoraxis	10x	meanNonmitotic	10xnucleus	0	m	majoraxis		passed
10x.meanNonmitotic.nucleus.0.m.eccentricity	10x.meanNonmitotic.nucleus.0.m.eccentricity	10x	meanNonmitotic	10xnucleus	0	m	eccentricity		passed
10x.meanNonmitotic.nucleus.0.s.area	10x.meanNonmitotic.nucleus.0.s.area	10x	meanNonmitotic	10xnucleus	0	s	area		passed
10x.meanNonmitotic.nucleus.0.s.perimeter	10x.meanNonmitotic.nucleus.0.s.perimeter	10x	meanNonmitotic	10xnucleus	0	s	perimeter		passed
10x.meanNonmitotic.nucleus.0.s.radius.mean	10x.meanNonmitotic.nucleus.0.s.radius.mean	10x	meanNonmitotic	10xnucleus	0	s	radius	mean	passed
10x.meanNonmitotic.nucleus.0.s.radius.min	10x.meanNonmitotic.nucleus.0.s.radius.min	10x	meanNonmitotic	10xnucleus	0	s	radius	min	passed
10x.meanNonmitotic.nucleus.0.s.radius.max	10x.meanNonmitotic.nucleus.0.s.radius.max	10x	meanNonmitotic	10xnucleus	0	s	radius	max	passed
10x.meanNonmitotic.nucleus.DAPI.b.mean	10x.meanNonmitotic.nucleus.DAPI.b.mean	10x	meanNonmitotic	10xnucleus	DAPI	b	mean		passed
10x.meanNonmitotic.nucleus.DAPI.b.sd	10x.meanNonmitotic.nucleus.DAPI.b.sd	10x	meanNonmitotic	10xnucleus	DAPI	b	sd		passed
10x.meanNonmitotic.nucleus.DAPI.b.mad	10x.meanNonmitotic.nucleus.DAPI.b.mad	10x	meanNonmitotic	10xnucleus	DAPI	b	mad		passed
10x.meanNonmitotic.nucleus.DAPI.b.q001	10x.meanNonmitotic.nucleus.DAPI.b.q001	10x	meanNonmitotic	10xnucleus	DAPI	b	q001		passed
10x.meanNonmitotic.nucleus.DAPI.b.q005	10x.meanNonmitotic.nucleus.DAPI.b.q005	10x	meanNonmitotic	10xnucleus	DAPI	b	q005		passed
10x.meanNonmitotic.nucleus.DAPI.b.q05	10x.meanNonmitotic.nucleus.DAPI.b.q05	10x	meanNonmitotic	10xnucleus	DAPI	b	q05		passed
10x.meanNonmitotic.nucleus.DAPI.b.q095	10x.meanNonmitotic.nucleus.DAPI.b.q095	10x	meanNonmitotic	10xnucleus	DAPI	b	q095		passed
10x.meanNonmitotic.nucleus.DAPI.b.q099	10x.meanNonmitotic.nucleus.DAPI.b.q099	10x	meanNonmitotic	10xnucleus	DAPI	b	q099		passed
10x.meanNonmitotic.nucleus.DAPI.m.majoraxis	major axis	10x	meanNonmitotic	10xnucleus	DAPI	m	majoraxis		passed
10x.meanNonmitotic.nucleus.DAPI.m.eccentricity	eccentricity (nonmitotic nuclei)	10x	meanNonmitotic	10xnucleus	DAPI	m	eccentricity		passed
10x.meanNonmitotic.nucleus.DAPI.h.asm.s1	10x.meanNonmitotic.nucleus.DAPI.h.asm.s1	10x	meanNonmitotic	10xnucleus	DAPI	h	asm	s1	failed
10x.meanNonmitotic.nucleus.DAPI.h.con.s1	10x.meanNonmitotic.nucleus.DAPI.h.con.s1	10x	meanNonmitotic	10xnucleus	DAPI	h	con	s1	failed
10x.meanNonmitotic.nucleus.DAPI.h.cor.s1	10x.meanNonmitotic.nucleus.DAPI.h.cor.s1	10x	meanNonmitotic	10xnucleus	DAPI	h	cor	s1	failed
10x.meanNonmitotic.nucleus.DAPI.h.var.s1	10x.meanNonmitotic.nucleus.DAPI.h.var.s1	10x	meanNonmitotic	10xnucleus	DAPI	h	var	s1	failed
10x.meanNonmitotic.nucleus.DAPI.h.idm.s1	10x.meanNonmitotic.nucleus.DAPI.h.idm.s1	10x	meanNonmitotic	10xnucleus	DAPI	h	idm	s1	failed
10x.meanNonmitotic.nucleus.DAPI.h.sav.s1	10x.meanNonmitotic.nucleus.DAPI.h.sav.s1	10x	meanNonmitotic	10xnucleus	DAPI	h	sav	s1	failed
10x.meanNonmitotic.nucleus.DAPI.h.sva.s1	10x.meanNonmitotic.nucleus.DAPI.h.sva.s1	10x	meanNonmitotic	10xnucleus	DAPI	h	sva	s1	failed
10x.meanNonmitotic.nucleus.DAPI.h.sen.s1	10x.meanNonmitotic.nucleus.DAPI.h.sen.s1	10x	meanNonmitotic	10xnucleus	DAPI	h	sen	s1	failed
10x.meanNonmitotic.nucleus.DAPI.h.ent.s1	10x.meanNonmitotic.nucleus.DAPI.h.ent.s1	10x	meanNonmitotic	10xnucleus	DAPI	h	ent	s1	failed
10x.meanNonmitotic.nucleus.DAPI.h.dva.s1	10x.meanNonmitotic.nucleus.DAPI.h.dva.s1	10x	meanNonmitotic	10xnucleus	DAPI	h	dva	s1	failed
10x.meanNonmitotic.nucleus.DAPI.h.den.s1	10x.meanNonmitotic.nucleus.DAPI.h.den.s1	10x	meanNonmitotic	10xnucleus	DAPI	h	den	s1	failed
10x.meanNonmitotic.nucleus.DAPI.h.f12.s1	10x.meanNonmitotic.nucleus.DAPI.h.f12.s1	10x	meanNonmitotic	10xnucleus	DAPI	h	f12	s1	failed
10x.meanNonmitotic.nucleus.DAPI.h.f13.s1	10x.meanNonmitotic.nucleus.DAPI.h.f13.s1	10x	meanNonmitotic	10xnucleus	DAPI	h	f13	s1	failed
10x.meanNonmitotic.nucleus.DAPI.h.asm.s2	10x.meanNonmitotic.nucleus.DAPI.h.asm.s2	10x	meanNonmitotic	10xnucleus	DAPI	h	asm	s2	failed
10x.meanNonmitotic.nucleus.DAPI.h.con.s2	10x.meanNonmitotic.nucleus.DAPI.h.con.s2	10x	meanNonmitotic	10xnucleus	DAPI	h	con	s2	failed
10x.meanNonmitotic.nucleus.DAPI.h.cor.s2	10x.meanNonmitotic.nucleus.DAPI.h.cor.s2	10x	meanNonmitotic	10xnucleus	DAPI	h	cor	s2	failed
10x.meanNonmitotic.nucleus.DAPI.h.var.s2	10x.meanNonmitotic.nucleus.DAPI.h.var.s2	10x	meanNonmitotic	10xnucleus	DAPI	h	var	s2	failed
10x.meanNonmitotic.nucleus.DAPI.h.idm.s2	10x.meanNonmitotic.nucleus.DAPI.h.idm.s2	10x	meanNonmitotic	10xnucleus	DAPI	h	idm	s2	failed
10x.meanNonmitotic.nucleus.DAPI.h.sav.s2	10x.meanNonmitotic.nucleus.DAPI.h.sav.s2	10x	meanNonmitotic	10xnucleus	DAPI	h	sav	s2	failed
10x.meanNonmitotic.nucleus.DAPI.h.sva.s2	10x.meanNonmitotic.nucleus.DAPI.h.sva.s2	10x	meanNonmitotic	10xnucleus	DAPI	h	sva	s2	failed
10x.meanNonmitotic.nucleus.DAPI.h.sen.s2	10x.meanNonmitotic.nucleus.DAPI.h.sen.s2	10x	meanNonmitotic	10xnucleus	DAPI	h	sen	s2	failed
10x.meanNonmitotic.nucleus.DAPI.h.ent.s2	10x.meanNonmitotic.nucleus.DAPI.h.ent.s2	10x	meanNonmitotic	10xnucleus	DAPI	h	ent	s2	failed
10x.meanNonmitotic.nucleus.DAPI.h.dva.s2	10x.meanNonmitotic.nucleus.DAPI.h.dva.s2	10x	meanNonmitotic	10xnucleus	DAPI	h	dva	s2	failed
10x.meanNonmitotic.nucleus.DAPI.h.den.s2	10x.meanNonmitotic.nucleus.DAPI.h.den.s2	10x	meanNonmitotic	10xnucleus	DAPI	h	den	s2	failed
10x.meanNonmitotic.nucleus.DAPI.h.f12.s2	10x.meanNonmitotic.nucleus.DAPI.h.f12.s2	10x	meanNonmitotic	10xnucleus	DAPI	h	f12	s2	failed
10x.meanNonmitotic.nucleus.DAPI.h.f13.s2	10x.meanNonmitotic.nucleus.DAPI.h.f13.s2	10x	meanNonmitotic	10xnucleus	DAPI	h	f13	s2	failed
10x.meanNonmitotic.cell.0.m.majoraxis	10x.meanNonmitotic.cell.0.m.majoraxis	10x	meanNonmitotic	10xcell	0	m	majoraxis		passed
10x.meanNonmitotic.cell.0.m.eccentricity	10x.meanNonmitotic.cell.0.m.eccentricity	10x	meanNonmitotic	10xcell	0	m	eccentricity		passed
10x.meanNonmitotic.cell.0.s.area	cell area	10x	meanNonmitotic	10xcell	0	s	area		passed
10x.meanNonmitotic.cell.0.s.perimeter	10x.meanNonmitotic.cell.0.s.perimeter	10x	meanNonmitotic	10xcell	0	s	perimeter		passed
10x.meanNonmitotic.cell.0.s.radius.mean	10x.meanNonmitotic.cell.0.s.radius.mean	10x	meanNonmitotic	10xcell	0	s	radius	mean	passed
10x.meanNonmitotic.cell.0.s.radius.min	10x.meanNonmitotic.cell.0.s.radius.min	10x	meanNonmitotic	10xcell	0	s	radius	min	passed
10x.meanNonmitotic.cell.0.s.radius.max	10x.meanNonmitotic.cell.0.s.radius.max	10x	meanNonmitotic	10xcell	0	s	radius	max	passed
10x.meanNonmitotic.cell.Tub.b.mean	10x.meanNonmitotic.cell.Tub.b.mean	10x	meanNonmitotic	10xcell	Tub	b	mean		passed
10x.meanNonmitotic.cell.Tub.b.sd	10x.meanNonmitotic.cell.Tub.b.sd	10x	meanNonmitotic	10xcell	Tub	b	sd		passed
10x.meanNonmitotic.cell.Tub.b.mad	10x.meanNonmitotic.cell.Tub.b.mad	10x	meanNonmitotic	10xcell	Tub	b	mad		passed
10x.meanNonmitotic.cell.Tub.b.q001	tubulin intensity, 1-percentile	10x	meanNonmitotic	10xcell	Tub	b	q001		passed
10x.meanNonmitotic.cell.Tub.b.q005	10x.meanNonmitotic.cell.Tub.b.q005	10x	meanNonmitotic	10xcell	Tub	b	q005		passed
10x.meanNonmitotic.cell.Tub.b.q05	10x.meanNonmitotic.cell.Tub.b.q05	10x	meanNonmitotic	10xcell	Tub	b	q05		passed
10x.meanNonmitotic.cell.Tub.b.q095	10x.meanNonmitotic.cell.Tub.b.q095	10x	meanNonmitotic	10xcell	Tub	b	q095		passed
10x.meanNonmitotic.cell.Tub.b.q099	10x.meanNonmitotic.cell.Tub.b.q099	10x	meanNonmitotic	10xcell	Tub	b	q099		passed
10x.meanNonmitotic.cell.Tub.m.majoraxis	10x.meanNonmitotic.cell.Tub.m.majoraxis	10x	meanNonmitotic	10xcell	Tub	m	majoraxis		passed
10x.meanNonmitotic.cell.Tub.m.eccentricity	eccentricity (nonmitotic cells)	10x	meanNonmitotic	10xcell	Tub	m	eccentricity		passed
10x.meanNonmitotic.cell.Tub.h.asm.s1	10x.meanNonmitotic.cell.Tub.h.asm.s1	10x	meanNonmitotic	10xcell	Tub	h	asm	s1	failed
10x.meanNonmitotic.cell.Tub.h.con.s1	10x.meanNonmitotic.cell.Tub.h.con.s1	10x	meanNonmitotic	10xcell	Tub	h	con	s1	failed
10x.meanNonmitotic.cell.Tub.h.cor.s1	10x.meanNonmitotic.cell.Tub.h.cor.s1	10x	meanNonmitotic	10xcell	Tub	h	cor	s1	failed
10x.meanNonmitotic.cell.Tub.h.var.s1	10x.meanNonmitotic.cell.Tub.h.var.s1	10x	meanNonmitotic	10xcell	Tub	h	var	s1	failed
10x.meanNonmitotic.cell.Tub.h.idm.s1	10x.meanNonmitotic.cell.Tub.h.idm.s1	10x	meanNonmitotic	10xcell	Tub	h	idm	s1	failed
10x.meanNonmitotic.cell.Tub.h.sav.s1	10x.meanNonmitotic.cell.Tub.h.sav.s1	10x	meanNonmitotic	10xcell	Tub	h	sav	s1	failed
10x.meanNonmitotic.cell.Tub.h.sva.s1	10x.meanNonmitotic.cell.Tub.h.sva.s1	10x	meanNonmitotic	10xcell	Tub	h	sva	s1	failed
10x.meanNonmitotic.cell.Tub.h.sen.s1	10x.meanNonmitotic.cell.Tub.h.sen.s1	10x	meanNonmitotic	10xcell	Tub	h	sen	s1	failed
10x.meanNonmitotic.cell.Tub.h.ent.s1	10x.meanNonmitotic.cell.Tub.h.ent.s1	10x	meanNonmitotic	10xcell	Tub	h	ent	s1	failed
10x.meanNonmitotic.cell.Tub.h.dva.s1	10x.meanNonmitotic.cell.Tub.h.dva.s1	10x	meanNonmitotic	10xcell	Tub	h	dva	s1	failed
10x.meanNonmitotic.cell.Tub.h.den.s1	10x.meanNonmitotic.cell.Tub.h.den.s1	10x	meanNonmitotic	10xcell	Tub	h	den	s1	failed
10x.meanNonmitotic.cell.Tub.h.f12.s1	10x.meanNonmitotic.cell.Tub.h.f12.s1	10x	meanNonmitotic	10xcell	Tub	h	f12	s1	failed
10x.meanNonmitotic.cell.Tub.h.f13.s1	10x.meanNonmitotic.cell.Tub.h.f13.s1	10x	meanNonmitotic	10xcell	Tub	h	f13	s1	failed
10x.meanNonmitotic.cell.Tub.h.asm.s2	10x.meanNonmitotic.cell.Tub.h.asm.s2	10x	meanNonmitotic	10xcell	Tub	h	asm	s2	failed
10x.meanNonmitotic.cell.Tub.h.con.s2	10x.meanNonmitotic.cell.Tub.h.con.s2	10x	meanNonmitotic	10xcell	Tub	h	con	s2	failed
10x.meanNonmitotic.cell.Tub.h.cor.s2	10x.meanNonmitotic.cell.Tub.h.cor.s2	10x	meanNonmitotic	10xcell	Tub	h	cor	s2	failed
10x.meanNonmitotic.cell.Tub.h.var.s2	10x.meanNonmitotic.cell.Tub.h.var.s2	10x	meanNonmitotic	10xcell	Tub	h	var	s2	failed
10x.meanNonmitotic.cell.Tub.h.idm.s2	10x.meanNonmitotic.cell.Tub.h.idm.s2	10x	meanNonmitotic	10xcell	Tub	h	idm	s2	failed
10x.meanNonmitotic.cell.Tub.h.sav.s2	10x.meanNonmitotic.cell.Tub.h.sav.s2	10x	meanNonmitotic	10xcell	Tub	h	sav	s2	failed
10x.meanNonmitotic.cell.Tub.h.sva.s2	10x.meanNonmitotic.cell.Tub.h.sva.s2	10x	meanNonmitotic	10xcell	Tub	h	sva	s2	failed
10x.meanNonmitotic.cell.Tub.h.sen.s2	10x.meanNonmitotic.cell.Tub.h.sen.s2	10x	meanNonmitotic	10xcell	Tub	h	sen	s2	failed
10x.meanNonmitotic.cell.Tub.h.ent.s2	10x.meanNonmitotic.cell.Tub.h.ent.s2	10x	meanNonmitotic	10xcell	Tub	h	ent	s2	failed
10x.meanNonmitotic.cell.Tub.h.dva.s2	10x.meanNonmitotic.cell.Tub.h.dva.s2	10x	meanNonmitotic	10xcell	Tub	h	dva	s2	failed
10x.meanNonmitotic.cell.Tub.h.den.s2	10x.meanNonmitotic.cell.Tub.h.den.s2	10x	meanNonmitotic	10xcell	Tub	h	den	s2	failed
10x.meanNonmitotic.cell.Tub.h.f12.s2	10x.meanNonmitotic.cell.Tub.h.f12.s2	10x	meanNonmitotic	10xcell	Tub	h	f12	s2	failed
10x.meanNonmitotic.cell.Tub.h.f13.s2	10x.meanNonmitotic.cell.Tub.h.f13.s2	10x	meanNonmitotic	10xcell	Tub	h	f13	s2	failed
10x.meanNonmitotic.cell.BDAPITub.b.mean	tubulin intensity	10x	meanNonmitotic	10xcell	BDAPITub	b	mean		passed
10x.meanNonmitotic.cell.BDAPITub.b.sd	10x.meanNonmitotic.cell.BDAPITub.b.sd	10x	meanNonmitotic	10xcell	BDAPITub	b	sd		passed
10x.meanNonmitotic.cell.BDAPITub.b.mad	10x.meanNonmitotic.cell.BDAPITub.b.mad	10x	meanNonmitotic	10xcell	BDAPITub	b	mad		passed
10x.meanNonmitotic.cell.BDAPITub.b.q001	10x.meanNonmitotic.cell.BDAPITub.b.q001	10x	meanNonmitotic	10xcell	BDAPITub	b	q001		passed
10x.meanNonmitotic.cell.BDAPITub.b.q005	10x.meanNonmitotic.cell.BDAPITub.b.q005	10x	meanNonmitotic	10xcell	BDAPITub	b	q005		passed
10x.meanNonmitotic.cell.BDAPITub.b.q05	10x.meanNonmitotic.cell.BDAPITub.b.q05	10x	meanNonmitotic	10xcell	BDAPITub	b	q05		passed
10x.meanNonmitotic.cell.BDAPITub.b.q095	10x.meanNonmitotic.cell.BDAPITub.b.q095	10x	meanNonmitotic	10xcell	BDAPITub	b	q095		passed
10x.meanNonmitotic.cell.BDAPITub.b.q099	10x.meanNonmitotic.cell.BDAPITub.b.q099	10x	meanNonmitotic	10xcell	BDAPITub	b	q099		passed
10x.meanNonmitotic.cell.BDAPITub.m.majoraxis	10x.meanNonmitotic.cell.BDAPITub.m.majoraxis	10x	meanNonmitotic	10xcell	BDAPITub	m	majoraxis		failed
10x.meanNonmitotic.cell.BDAPITub.m.eccentricity	10x.meanNonmitotic.cell.BDAPITub.m.eccentricity	10x	meanNonmitotic	10xcell	BDAPITub	m	eccentricity		failed
10x.meanNonmitotic.cell.BDAPITub.h.asm.s1	10x.meanNonmitotic.cell.BDAPITub.h.asm.s1	10x	meanNonmitotic	10xcell	BDAPITub	h	asm	s1	failed
10x.meanNonmitotic.cell.BDAPITub.h.con.s1	10x.meanNonmitotic.cell.BDAPITub.h.con.s1	10x	meanNonmitotic	10xcell	BDAPITub	h	con	s1	failed
10x.meanNonmitotic.cell.BDAPITub.h.cor.s1	10x.meanNonmitotic.cell.BDAPITub.h.cor.s1	10x	meanNonmitotic	10xcell	BDAPITub	h	cor	s1	failed
10x.meanNonmitotic.cell.BDAPITub.h.var.s1	10x.meanNonmitotic.cell.BDAPITub.h.var.s1	10x	meanNonmitotic	10xcell	BDAPITub	h	var	s1	failed
10x.meanNonmitotic.cell.BDAPITub.h.idm.s1	10x.meanNonmitotic.cell.BDAPITub.h.idm.s1	10x	meanNonmitotic	10xcell	BDAPITub	h	idm	s1	failed
10x.meanNonmitotic.cell.BDAPITub.h.sav.s1	10x.meanNonmitotic.cell.BDAPITub.h.sav.s1	10x	meanNonmitotic	10xcell	BDAPITub	h	sav	s1	failed
10x.meanNonmitotic.cell.BDAPITub.h.sva.s1	10x.meanNonmitotic.cell.BDAPITub.h.sva.s1	10x	meanNonmitotic	10xcell	BDAPITub	h	sva	s1	failed
10x.meanNonmitotic.cell.BDAPITub.h.sen.s1	10x.meanNonmitotic.cell.BDAPITub.h.sen.s1	10x	meanNonmitotic	10xcell	BDAPITub	h	sen	s1	failed
10x.meanNonmitotic.cell.BDAPITub.h.ent.s1	10x.meanNonmitotic.cell.BDAPITub.h.ent.s1	10x	meanNonmitotic	10xcell	BDAPITub	h	ent	s1	failed
10x.meanNonmitotic.cell.BDAPITub.h.dva.s1	10x.meanNonmitotic.cell.BDAPITub.h.dva.s1	10x	meanNonmitotic	10xcell	BDAPITub	h	dva	s1	failed
10x.meanNonmitotic.cell.BDAPITub.h.den.s1	10x.meanNonmitotic.cell.BDAPITub.h.den.s1	10x	meanNonmitotic	10xcell	BDAPITub	h	den	s1	failed
10x.meanNonmitotic.cell.BDAPITub.h.f12.s1	10x.meanNonmitotic.cell.BDAPITub.h.f12.s1	10x	meanNonmitotic	10xcell	BDAPITub	h	f12	s1	failed
10x.meanNonmitotic.cell.BDAPITub.h.f13.s1	10x.meanNonmitotic.cell.BDAPITub.h.f13.s1	10x	meanNonmitotic	10xcell	BDAPITub	h	f13	s1	failed
10x.meanNonmitotic.cell.BDAPITub.h.asm.s2	10x.meanNonmitotic.cell.BDAPITub.h.asm.s2	10x	meanNonmitotic	10xcell	BDAPITub	h	asm	s2	failed
10x.meanNonmitotic.cell.BDAPITub.h.con.s2	10x.meanNonmitotic.cell.BDAPITub.h.con.s2	10x	meanNonmitotic	10xcell	BDAPITub	h	con	s2	failed
10x.meanNonmitotic.cell.BDAPITub.h.cor.s2	10x.meanNonmitotic.cell.BDAPITub.h.cor.s2	10x	meanNonmitotic	10xcell	BDAPITub	h	cor	s2	failed
10x.meanNonmitotic.cell.BDAPITub.h.var.s2	10x.meanNonmitotic.cell.BDAPITub.h.var.s2	10x	meanNonmitotic	10xcell	BDAPITub	h	var	s2	failed
10x.meanNonmitotic.cell.BDAPITub.h.idm.s2	10x.meanNonmitotic.cell.BDAPITub.h.idm.s2	10x	meanNonmitotic	10xcell	BDAPITub	h	idm	s2	failed
10x.meanNonmitotic.cell.BDAPITub.h.sav.s2	10x.meanNonmitotic.cell.BDAPITub.h.sav.s2	10x	meanNonmitotic	10xcell	BDAPITub	h	sav	s2	failed
10x.meanNonmitotic.cell.BDAPITub.h.sva.s2	10x.meanNonmitotic.cell.BDAPITub.h.sva.s2	10x	meanNonmitotic	10xcell	BDAPITub	h	sva	s2	failed
10x.meanNonmitotic.cell.BDAPITub.h.sen.s2	10x.meanNonmitotic.cell.BDAPITub.h.sen.s2	10x	meanNonmitotic	10xcell	BDAPITub	h	sen	s2	failed
10x.meanNonmitotic.cell.BDAPITub.h.ent.s2	10x.meanNonmitotic.cell.BDAPITub.h.ent.s2	10x	meanNonmitotic	10xcell	BDAPITub	h	ent	s2	failed
10x.meanNonmitotic.cell.BDAPITub.h.dva.s2	10x.meanNonmitotic.cell.BDAPITub.h.dva.s2	10x	meanNonmitotic	10xcell	BDAPITub	h	dva	s2	failed
10x.meanNonmitotic.cell.BDAPITub.h.den.s2	10x.meanNonmitotic.cell.BDAPITub.h.den.s2	10x	meanNonmitotic	10xcell	BDAPITub	h	den	s2	failed
10x.meanNonmitotic.cell.BDAPITub.h.f12.s2	10x.meanNonmitotic.cell.BDAPITub.h.f12.s2	10x	meanNonmitotic	10xcell	BDAPITub	h	f12	s2	failed
10x.meanNonmitotic.cell.BDAPITub.h.f13.s2	10x.meanNonmitotic.cell.BDAPITub.h.f13.s2	10x	meanNonmitotic	10xcell	BDAPITub	h	f13	s2	failed
