# Supplementary material for: A map of directional genetic interactions in a metazoan cell
Source: eLife. 2015 Mar 6;4:e05464. doi: 10.7554/eLife.05464 (PMC4384530; doi:10.7554/eLife.05464)
Supplement: Supplementary file 4. — A table of selected non-redundant features. DOI: http://dx.doi.org/10.7554/eLife.05464.022 [file elife05464s004.xlsx]

## Sheet: Table_S5_SelectedFeatures
Supplemental Table S4. Selected non-redundant features
ID	systematic feature identifier
Name	feature name as used in the paper
Correlation	correlation between replicates (used for quality control)
Residual Correlation	correlation of residuals between replicates (used for feature selection)
RatioPositive	ratio of features with positive correlation
Selected	selected features are marked
ID	Name	Correlation	Residual Correlation	RatioPositive	Selected
4x.count	cell number	0.93302	0.91179	1	Selected
4x.ratioMitotic	mitotic index	0.921945	0.868174	0.956522	Selected
10x.meanNonmitotic.cell.0.s.area	cell area	0.867187	0.558694	0.95	Selected
4x.countpH3	number of mitotic objects	0.92683	0.946317	0.893082	Selected
4x.areaNucAll	area of nuclei	0.97145	0.896399	0.879747	Selected
4x.areapH3All	area of mitotic nuclei	0.869459	0.746086	0.859873	Selected
4x.areaNucH9	area of nuclei, bin 9	0.900452	0.738087	0.846154	Selected
4x.areaNucH1	area of nuclei, bin 1	0.927442	0.664842	0.845161	Selected
4x.areaNucH3	area of nuclei, bin 3	0.961679	0.610991	0.837662	Selected
4x.intH3pH4	pH3 intensity, bin 4	0.778315	0.526364	0.836601	Selected
4x.intNucH4	nuclei intensity, bin 4	0.88152	0.52588	0.835526	Selected
4x.intNucH9	nuclei intensity, bin 9	0.923854	0.513188	0.821192	Selected
10x.meanNonmitotic.cell.Tub.m.eccentricity	eccentricity (nonmitotic cells)	0.773189	0.482932	0.8	Selected
4x.areaNucQ0.75	area of nuclei, 75-percentile	0.953856	0.414682	0.785235	Selected
4x.areaNucH6	area of nuclei, bin 6	0.89919	0.365563	0.783784	Selected
10x.meanNonmitotic.nucleus.DAPI.m.majoraxis	major axis	0.815049	0.363094	0.768707	Selected
4x.intH3pH3	pH3 Intensity, bin 3	0.792831	0.356996	0.691781	Selected
10x.meanMitotic.cell.Tub.b.sd	tubulin intensity, stddev	0.806508	0.356788	0.682759	Selected
4x.LCD2	local cell density 2	0.976506	0.336977	0.541667	Selected
4x.areaNucQ0.10	area of nuclei, 10-percentile	0.891099	0.326971	0.517483	Selected
4x.intNucH7	nuclei intensity, bin 7	0.919525	0.28547	0.507042	Selected
4x.areapH3SD	area of mitotic nuclei, stddev	0.816137	0.248788	0.496454
10x.meanMitotic.cell.0.s.radius.min	minimum radius	0.660451	0.229485	0.457143
4x.intNucQ0.97	nuclei intensity, 97-percentile	0.921806	0.227763	0.402878
4x.areaNucQ0.90	area of nuclei, 90-percentile	0.964303	0.216124	0.268116
4x.areaNucH11	area of nuclei, bin 11	0.96372	0.19995	0.248175
4x.intH3pH5	pH3 intensity, bin 5	0.853768	0.130764	0.213235
4x.isMitotic	number of mitotic nuclei	0.926598	0.125598	0.177778
4x.intNucQ0.03	nuclei intensity, 3-percentile	0.945845	0.121425	0.171642
4x.areaNucQ0.03	area of nuclei, 3-percentile	0.851022	0.0934034	0.157895
10x.meanMitotic.nucleus.DAPI.m.eccentricity	eccentricity (mitotic nuclei)	0.608299	0.0878051	0.143939
10x.meanNonmitotic.cell.Tub.b.q001	tubulin intensity, 1-percentile	0.943437	0.0477655	0.122137
4x.areaNucH2	area of nuclei, bin 2	0.958435	0.0463335	0.0769231
4x.intpH3SD	pH3 intensity, stddev	0.881535	0.044546	0.0620155
4x.areaNucQ0.25	area of nuclei, 25-percentile	0.921468	0.0262858	0.015625
4x.areaNucSDAll	area of nuclei, stddev	0.884735	0.00240982	0.00787402
4x.areaNucH4	area of nuclei, bin 4	0.895492	-0.009223	0
4x.LCDratio.LCD4	local cell density 3	0.936345	-0.0114338	0
4x.intH3pH2	pH3 intensity, bin 2	0.732781	-0.0169833	0
4x.intH3pQ0.03	pH3 intensity, 3-percentile	0.657016	-0.020761	0
10x.meanMitotic.nucleus.DAPI.b.sd	nuclei intensity, stddev	0.632933	-0.0331954	0
4x.intNucH2	nuclei intensity, bin 2	0.92958	-0.034394	0
10x.meanMitotic.cell.0.s.perimeter	perimeter	0.634872	-0.0357415	0
4x.LCD1	local cell density 1	0.965381	-0.037497	0
4x.areaNucH8	area of nuclei, bin 8	0.900883	-0.0452789	0
4x.areaNucQ0.97	area of nuclei, 97-percentile	0.968511	-0.0533176	0
4x.areaNucQ0.50	area of nuclei, median	0.94167	-0.0825232	0
10x.meanNonmitotic.nucleus.DAPI.m.eccentricity	eccentricity (nonmitotic nuclei)	0.783526	-0.0855081	0
10x.meanNonmitotic.cell.BDAPITub.b.mean	tubulin intensity	0.663967	-0.117143	0
4x.intH3pH6	pH3 intensity, bin 6	0.888053	-0.136449	0
