# Supplementary material for: A map of directional genetic interactions in a metazoan cell
Source: eLife. 2015 Mar 6;4:e05464. doi: 10.7554/eLife.05464 (PMC4384530; doi:10.7554/eLife.05464)
Supplement: Supplementary file 5. — A table of genes passed quality control. DOI: http://dx.doi.org/10.7554/eLife.05464.023 [file elife05464s005.xlsx]

## Sheet: Table_S5_QualtiyControl
Supplemental Table S5. Genes passed quality control
FBgnID	FBgn gene identifier
Symbol	Gene symbol
FlybaseID	Symbol
FBgn0263968	nonC
FBgn0030990	CG7556
FBgn0011725	twin
FBgn0010762	simj
FBgn0053182	Kdm4B
FBgn0010602	lwr
FBgn0036534	Dcp2
FBgn0026326	Mad1
FBgn0031452	Cwc25
FBgn0010173	RpA-70
FBgn0025381	rush
FBgn0264493	rdx
FBgn0029157	ssh
FBgn0003275	RpII18
FBgn0003744	trc
FBgn0030711	Rrp47
FBgn0037734	trbd
FBgn0010520	Bka
FBgn0051064	CG31064
FBgn0039338	XNP
FBgn0025463	Bap60
FBgn0035762	CG8605
FBgn0027903	CG12018
FBgn0263237	Cdk7
FBgn0038766	CG4854
FBgn0029504	CHES-1-like
FBgn0034051	Mlf
FBgn0033948	CG12863
FBgn0266377	Pde8
FBgn0039858	CycG
FBgn0032348	CG4751
FBgn0262656	dm
FBgn0025455	CycT
FBgn0000117	arm
FBgn0261976	Psf2
FBgn0004391	shtd
FBgn0262619	DNA-ligI
FBgn0022772	Orc1
FBgn0005777	PpD3
FBgn0001276	ix
FBgn0024291	Sir2
FBgn0013756	Mtor
FBgn0037478	CG2656
FBgn0033934	CG17385
FBgn0028402	Sin
FBgn0261985	Ptpmeg
FBgn0035993	Nf-YA
FBgn0024920	Ts
FBgn0035424	CG11505
FBgn0000253	Cam
FBgn0061200	Nup153
FBgn0001104	Galphai
FBgn0003139	PpV
FBgn0004855	RpII15
FBgn0024238	Fim
FBgn0013762	Cdk5
FBgn0038746	Surf6
FBgn0031484	CG3165
FBgn0260749	Utx
FBgn0032748	CG10492
FBgn0260985	RfC4
FBgn0037659	Kdm2
FBgn0027339	jim
FBgn0002044	swm
FBgn0010747	Srp54k
FBgn0027574	CG5815
FBgn0002525	Lam
FBgn0001179	hay
FBgn0004436	UbcD6
FBgn0003891	tud
FBgn0030877	Arp8
FBgn0004396	CrebA
FBgn0261797	Dhc64C
FBgn0034645	CG10320
FBgn0034310	Nup75
FBgn0263979	Caf1
FBgn0262103	Sik3
FBgn0261617	nej
FBgn0027509	CG7261
FBgn0036746	Crtc
FBgn0026196	nop5
FBgn0040075	rept
FBgn0010339	128up
FBgn0003415	skd
FBgn0040918	schlank
FBgn0030506	Lig4
FBgn0031909	CG5181
FBgn0030891	dik
FBgn0037843	CG4511
FBgn0016696	Pitslre
FBgn0005671	Vha55
FBgn0039004	Nup133
FBgn0263855	BubR1
FBgn0262975	cnc
FBgn0028837	CSN6
FBgn0004856	Bx42
FBgn0010269	Dsor1
FBgn0030269	CG18292
FBgn0012058	Cdc27
FBgn0086895	pea
FBgn0034933	CG3735
FBgn0023215	Mnt
FBgn0266284	Ns3
FBgn0034181	CG8963
FBgn0029941	CG1677
FBgn0260991	Incenp
FBgn0025742	mtm
FBgn0028647	CG11902
FBgn0031399	mio
FBgn0030556	mRNA-cap
FBgn0025457	Bub3
FBgn0038585	CG7993
FBgn0261618	larp
FBgn0010356	Taf5
FBgn0033342	CG8258
FBgn0014018	Rel
FBgn0002431	hyd
FBgn0004656	fs(1)h
FBgn0030354	Upf1
FBgn0040273	Spt5
FBgn0002736	mago
FBgn0033400	CG2063
FBgn0052685	ZAP3
FBgn0013347	TfIIA-S
FBgn0032600	CG17912
FBgn0035295	Cnb
FBgn0000382	csw
FBgn0031759	lid
FBgn0000152	Axs
FBgn0010421	TfIIFbeta
FBgn0010280	Taf4
FBgn0024330	MED6
FBgn0010638	Sec61beta
FBgn0035021	CG4622
FBgn0037554	DNApol-iota
FBgn0037102	CG7172
FBgn0261573	CoRest
FBgn0003042	Pc
FBgn0086444	l(2)37Cb
FBgn0031183	CG14621
FBgn0034299	CG5757
FBgn0045852	ham
FBgn0000017	Abl
FBgn0022724	Taf8
FBgn0021995	Rs1
FBgn0050011	gem
FBgn0026143	CDC45L
FBgn0024909	Taf7
FBgn0031601	Dim1
FBgn0023518	trr
FBgn0031655	Marcal1
FBgn0039260	Smg6
FBgn0262519	Mi-2
FBgn0003189	r
FBgn0030800	CG9104
FBgn0003206	Ras64B
FBgn0038964	Nop56
FBgn0039337	MED28
FBgn0011289	TfIIA-L
FBgn0022069	Nnp-1
FBgn0036775	CG5147
FBgn0035766	eco
FBgn0053554	Nipped-A
FBgn0029800	lin-52
FBgn0031868	Rat1
FBgn0016076	vri
FBgn0031115	CG11710
FBgn0026722	drosha
FBgn0010660	Nup214
FBgn0051992	gw
FBgn0032194	CG4901
FBgn0029094	asf1
FBgn0004606	zfh1
FBgn0026533	Dek
FBgn0032408	CG6712
FBgn0015754	Lis-1
FBgn0031456	Trn-SR
FBgn0020306	dom
FBgn0000405	CycB
FBgn0021796	Tor
FBgn0034534	maf-S
FBgn0038057	CG12267
FBgn0015376	cutlet
FBgn0037262	MED31
FBgn0034722	Rtf1
FBgn0010278	Ssrp
FBgn0024956	Mat1
FBgn0036581	MED10
FBgn0035918	Cdc6
FBgn0022764	Sin3A
FBgn0039846	CG11337
FBgn0011823	Pen
FBgn0038903	RpI12
FBgn0051251	CG31251
FBgn0003044	Pcl
FBgn0005655	PCNA
FBgn0036918	CG7770
FBgn0040078	pont
FBgn0029868	CG3446
FBgn0020655	ArfGAP1
FBgn0011737	wee
FBgn0031873	Gas41
FBgn0037555	Ada2b
FBgn0015805	Rpd3
FBgn0260962	pic
FBgn0003278	RpI135
FBgn0023177	Pp4-19C
FBgn0035900	ZC3H3
FBgn0263755	Su(var)3-9
FBgn0029672	CG2875
FBgn0002413	dco
FBgn0011655	Med
FBgn0002774	mle
FBgn0030787	CG9609
FBgn0031779	CG9175
FBgn0026181	rok
FBgn0086904	Nacalpha
FBgn0028292	ric8a
FBgn0004893	bowl
FBgn0051365	CG31365
FBgn0011020	Sas-4
FBgn0024332	Mcm3
FBgn0036277	CG10418
FBgn0086361	alph
FBgn0265003	koi
FBgn0015268	Nap1
FBgn0033690	EndoG
FBgn0031091	Phf7
FBgn0036104	CG6418
FBgn0004914	Hnf4
FBgn0024985	CG11448
FBgn0035754	MED4
FBgn0052500	CG32500
FBgn0016685	Nlp
FBgn0028398	Taf10
FBgn0038869	CG3353
FBgn0039559	Mes-4
FBgn0000618	e(y)2
FBgn0019949	Cdk9
FBgn0043884	mask
FBgn0030699	CG8578
FBgn0039509	bigmax
FBgn0014879	Set
FBgn0004889	tws
FBgn0051224	CG31224
FBgn0035149	MED30
FBgn0040929	CG12659
FBgn0039305	CG11858
FBgn0029992	Upf2
FBgn0025637	skpA
FBgn0004107	cdc2c
FBgn0038950	CG5382
FBgn0053051	CG33051
FBgn0000099	ap
FBgn0015615	Cap
FBgn0263757	Rpb4
FBgn0032921	Mpp6
FBgn0034503	MED8
FBgn0033052	SCAP
FBgn0003334	Scm
FBgn0034528	CG11180
FBgn0050372	Asap1
FBgn0013343	Syx1A
FBgn0001291	Jra
FBgn0003892	ptc
FBgn0011573	Cdc37
FBgn0037182	ArfGAP3
FBgn0263933	ebi
FBgn0020510	Abi
FBgn0021761	Nup154
FBgn0261885	osa
FBgn0030521	CtsB1
FBgn0026430	Grip84
FBgn0032051	CG13097
FBgn0038805	TFAM
FBgn0043001	Chrac-16
FBgn0011604	Iswi
FBgn0034186	CG8950
FBgn0037561	CG9630
FBgn0031711	CG6907
FBgn0039169	Spps
FBgn0265598	Bx
FBgn0029711	Usf
FBgn0052251	Claspin
FBgn0030086	CG7033
FBgn0040465	Dip3
FBgn0002638	Rcc1
FBgn0050291	CG30291
FBgn0027053	CSN5
FBgn0000568	Eip75B
FBgn0036515	CG12304
FBgn0001986	l(2)35Df
FBgn0010741	l(3)01239
FBgn0036448	mop
FBgn0001168	h
FBgn0036516	CG7656
FBgn0002643	mam
FBgn0020386	Pdk1
FBgn0003870	ttk
FBgn0027055	CSN3
FBgn0003862	trx
FBgn0021825	Dmn
FBgn0040339	MED22
FBgn0004432	Cyp1
FBgn0001965	Sos
FBgn0032796	CG10188
FBgn0086902	kis
FBgn0052823	Sdic3
FBgn0017578	Max
FBgn0011742	Arp2
FBgn0003277	RpII215
FBgn0041781	SCAR
FBgn0039680	Cap-D2
FBgn0261286	Mat89Ba
FBgn0031020	Nat1
FBgn0004837	Su(H)
FBgn0010397	LamC
FBgn0260648	Rrp40
FBgn0026869	Thd1
FBgn0034879	Rrp4
FBgn0036194	CG11652
FBgn0261278	grp
FBgn0015019	Cctgamma
FBgn0010355	Taf1
FBgn0034599	CG9437
FBgn0001330	kz
FBgn0003396	shn
FBgn0264959	Src42A
FBgn0032988	Tif-IA
FBgn0003676	T-cp1
FBgn0011764	Dsp1
FBgn0001324	kto
FBgn0039016	Dcr-1
FBgn0011762	DNApol-alpha50
FBgn0261456	hpo
FBgn0010438	mtSSB
FBgn0003345	sd
FBgn0037613	Cks85A
FBgn0029905	Nf-YC
FBgn0031540	CG3238
FBgn0263993	CG43736
FBgn0020633	Mcm7
FBgn0037359	MED27
FBgn0037093	Cdk12
FBgn0003884	alphaTub84B
FBgn0036059	nudE
FBgn0038475	Keap1
FBgn0036239	Pop2
FBgn0036761	MED19
FBgn0032515	loqs
FBgn0040346	CG3704
FBgn0032516	CG9293
FBgn0000581	E(Pc)
FBgn0029148	NHP2
FBgn0021760	chb
FBgn0038035	lig3
FBgn0263987	spoon
FBgn0027783	SMC2
FBgn0032006	Pvr
FBgn0034650	NC2alpha
FBgn0263231	bel
FBgn0040207	kat80
FBgn0002031	l(2)37Cc
FBgn0003118	pnt
FBgn0051155	Rpb7
FBgn0030789	Rrp45
FBgn0030945	Ing3
FBgn0086445	l(2)37Cd
FBgn0025832	Fen1
FBgn0037376	CG2051
FBgn0086447	l(2)37Cg
FBgn0036500	CG7275
FBgn0036341	Syx13
FBgn0010621	Cct5
FBgn0001565	Hlc
FBgn0027492	wdb
FBgn0025825	Hdac3
FBgn0038462	CG17556
FBgn0265784	CrebB
FBgn0040235	c12.1
FBgn0034897	Sesn
FBgn0034646	Rae1
FBgn0038454	CG10324
FBgn0033859	CG6197
FBgn0265605	Ric
FBgn0004379	Klp67A
FBgn0001086	fzy
FBgn0025674	CycK
FBgn0038301	CG6654
FBgn0086707	ncm
FBgn0034231	APC10
FBgn0003204	ras
FBgn0041191	Rheb
FBgn0027568	Cand1
FBgn0004198	ct
FBgn0013746	alien
FBgn0017414	cag
FBgn0004583	ex
FBgn0032248	CG5343
FBgn0027287	Gmap
FBgn0003507	srp
FBgn0005616	msl-2
FBgn0033155	Br140
FBgn0016694	Pdp1
FBgn0016131	Cdk4
FBgn0035851	MED24
FBgn0020620	RN-tre
FBgn0033754	Ak6
FBgn0032030	Wdr82
FBgn0015396	jumu
FBgn0011290	Taf12
FBgn0035194	Psf1
FBgn0038578	MED17
FBgn0262737	mub
FBgn0010551	l(2)03709
FBgn0262714	Sap130
FBgn0027524	CG3909
FBgn0038768	CG4936
FBgn0002906	Blm
FBgn0025716	Bap55
FBgn0036374	Spt20
FBgn0027329	Tcp-1zeta
FBgn0001139	gro
FBgn0029666	CG10803
FBgn0001491	l(1)10Bb
FBgn0015553	tos
FBgn0032321	YL-1
FBgn0036621	roq
FBgn0001078	ftz-f1
FBgn0015797	Rab6
FBgn0031777	CG9154
FBgn0032634	Rpb11
FBgn0031657	CG3756
FBgn0262955	RpII140
FBgn0002932	neur
FBgn0039908	Asator
FBgn0000617	e(y)1
FBgn0024887	kin17
FBgn0002283	l(3)73Ah
FBgn0037747	CG8481
FBgn0005596	yemalpha
FBgn0032924	Nbr
FBgn0031287	CG4291
FBgn0003479	spn-A
FBgn0004643	mit(1)15
FBgn0261268	Cul-3
FBgn0041147	ida
FBgn0262716	Arp3
FBgn0003482	spn-D
FBgn0005660	Ets21C
FBgn0031051	Ranbp21
FBgn0039183	Dis3
FBgn0031635	tank
FBgn0025864	Crag
FBgn0052438	Smc5
FBgn0043364	cbt
FBgn0011802	Gem3
FBgn0038772	CG4973
FBgn0031977	baf
FBgn0004463	RpIII128
FBgn0010417	Taf6
FBgn0035532	CG15014
FBgn0026441	ear
FBgn0038490	CG5285
FBgn0035714	CG8549
FBgn0029783	Sirt4
FBgn0001987	Gli
FBgn0028411	Nxt1
FBgn0034758	CG13510
FBgn0037345	rev7
FBgn0261109	mrn
FBgn0000150	awd
FBgn0032816	Nf-YB
FBgn0052533	CG32533
FBgn0022787	Hel89B
FBgn0004406	tam
FBgn0030170	CG2990
FBgn0032863	Cdc23
FBgn0051390	MED7
FBgn0038106	CG7488
FBgn0000541	E(bx)
FBgn0030855	CG5800
FBgn0030833	CG8915
FBgn0033352	CG8232
FBgn0011648	Mad
FBgn0023211	Elongin-C
FBgn0030434	Brms1
FBgn0032813	CG10262
FBgn0037384	dgrn
FBgn0050085	Rif1
FBgn0035026	Fcp1
FBgn0031308	CG4749
FBgn0004510	Ets97D
FBgn0037551	Gie
FBgn0002989	okr
FBgn0039270	PQBP1
FBgn0032154	mtDNA-helicase
FBgn0039233	CG7006
FBgn0003977	vir
FBgn0014388	sty
FBgn0031401	papi
FBgn0032929	Mcm10
FBgn0034495	CG11788
FBgn0011836	Taf2
FBgn0011715	Snr1
FBgn0000018	abo
FBgn0030246	CG1582
FBgn0003079	phl
FBgn0030486	Set2
FBgn0033380	Phax
FBgn0261850	Xpd
FBgn0004698	mus210
FBgn0035640	mad2
FBgn0036811	MED11
FBgn0039165	CG6204
FBgn0086451	l(2)k09022
FBgn0002783	mor
FBgn0032956	Cul-2
FBgn0029885	CG3224
FBgn0028406	Drep-4
FBgn0086695	hd
FBgn0019938	RpI1
FBgn0033526	Caf1-105
FBgn0023097	bon
FBgn0001108	Gl
FBgn0033379	Mys45A
FBgn0016054	phr6-4
FBgn0015391	glu
FBgn0010282	TfIIFalpha
FBgn0003687	Tbp
FBgn0265574	Cdc5
FBgn0261394	Prosalpha3
FBgn0030054	Caf1-180
FBgn0030063	CG1789
FBgn0033571	Rpb5
FBgn0027889	ball
FBgn0031851	Aatf
FBgn0032346	Csl4
FBgn0003525	stg
FBgn0011202	dia
FBgn0020497	emb
FBgn0037120	CG11247
FBgn0038055	trus
FBgn0029896	CG3168
FBgn0086613	Ino80
FBgn0033926	Arc1
FBgn0035145	MED14
FBgn0035689	CG7376
FBgn0000524	dx
FBgn0038108	CG7518
FBgn0039829	CG15561
FBgn0032870	CG2608
FBgn0026876	CG11403
FBgn0037569	tex
FBgn0035518	CG15011
FBgn0015828	TfIIEalpha
FBgn0034065	Rrp42
FBgn0030242	sofe
FBgn0021768	nudC
FBgn0263916	Ent2
FBgn0002716	mei-W68
FBgn0026373	RpII33
FBgn0028662	VhaPPA1-1
FBgn0039274	CG11920
FBgn0261530	nbs
FBgn0028931	CG16863
FBgn0086370	sra
FBgn0040068	Vav
FBgn0022936	CycH
FBgn0035227	CG12090
FBgn0025807	Rad9
FBgn0027948	msps
FBgn0263604	l(3)72Dh
FBgn0040233	cana
FBgn0011774	Irbp
FBgn0264325	Atg6
FBgn0027784	Prp18
FBgn0031604	Elp3
FBgn0032444	CG5525
FBgn0030878	CG6769
FBgn0037716	CG8273
FBgn0086130	Dbp21E2
FBgn0263197	Patronin
FBgn0260741	CG3281
FBgn0003654	sw
FBgn0263289	scrib
FBgn0263667	Lpt
FBgn0262732	mbf1
FBgn0030093	dalao
FBgn0040232	cmet
FBgn0000063	ald
FBgn0052344	CG32344
FBgn0002791	mr
FBgn0035720	CG10077
FBgn0026262	bip2
FBgn0051249	CG31249
FBgn0032690	CG10333
FBgn0033183	CG1620
FBgn0041171	ago
FBgn0025634	CG13367
FBgn0263048	CG43343
FBgn0001994	crp
FBgn0034962	MAN1
FBgn0036964	CG6480
FBgn0000546	EcR
FBgn0000259	CkIIbeta
FBgn0038047	CG5245
FBgn0027356	Amph
FBgn0003612	Su(var)2-10
FBgn0035707	CG8368
FBgn0261396	Rpn3
FBgn0023172	RhoGEF2
FBgn0004811	fs(2)ltoPP43
FBgn0013435	cdc2rk
FBgn0036827	CG6843
FBgn0037632	Tcp-1eta
FBgn0033752	CG8569
FBgn0003502	Btk29A
FBgn0001978	stc
FBgn0265523	Smr
FBgn0004367	mei-41
FBgn0265935	coro
FBgn0037263	slx1
FBgn0010315	CycD
FBgn0028691	Rpn9
FBgn0003483	spn-E
FBgn0035702	CG10147
FBgn0032859	Arpc2
FBgn0022935	D19A
FBgn0039731	Sas-6
FBgn0039066	EloA
FBgn0032919	CG9253
FBgn0263600	DNApol-delta
FBgn0000146	aub
FBgn0037121	Rpb8
FBgn0010382	CycE
FBgn0023212	Elongin-B
FBgn0261283	HLH106
FBgn0035624	Eaf6
FBgn0020238	14-3-3epsilon
FBgn0041092	tai
FBgn0011763	Dp
FBgn0261266	zuc
FBgn0261823	Asx
FBgn0031392	AIF
FBgn0003117	pnr
FBgn0015929	dpa
FBgn0051953	CR31953
FBgn0015283	Rpn10
FBgn0000542	ec
FBgn0086359	Invadolysin
FBgn0028683	spt4
FBgn0034946	CG3065
FBgn0030061	CG1785
FBgn0027066	Eb1
FBgn0260397	Su(var)3-3
FBgn0026417	Hus1-like
FBgn0025800	Smox
FBgn0030646	CG9203
FBgn0011474	pr-set7
FBgn0086347	Myo31DF
FBgn0002924	ncd
FBgn0030758	CanA-14F
FBgn0260399	gwl
FBgn0020616	SA
FBgn0033092	CG9422
FBgn0016984	sktl
FBgn0262127	kibra
FBgn0038546	CG7379
FBgn0029755	Sas10
FBgn0003514	sqh
FBgn0015298	Srp19
FBgn0035690	CG10274
FBgn0003346	RanGAP
FBgn0015829	TfIIEbeta
FBgn0035025	uri
FBgn0034975	enok
FBgn0010768	sqz
FBgn0023169	SNF1A
FBgn0031390	tho2
FBgn0032907	CG9272
FBgn0026079	Nsun2
FBgn0051687	CG31687
FBgn0034351	CG5190
FBgn0033929	Tfb1
FBgn0037926	Elp1
FBgn0039544	CG12877
FBgn0025781	Cdc16
FBgn0014189	Hel25E
FBgn0004419	me31B
FBgn0004861	ph-p
FBgn0000289	cg
FBgn0026056	Rlip
FBgn0010246	Myo61F
FBgn0019637	Atu
FBgn0031537	sec5
FBgn0004556	Dbp73D
FBgn0033994	CG7544
FBgn0011818	oaf
FBgn0020255	Ran
FBgn0005617	msl-1
FBgn0036398	upSET
FBgn0028693	Rpn12
FBgn0000307	chif
FBgn0011710	2001-09-01
FBgn0003302	rux
FBgn0025802	Sbf
FBgn0038197	foxo
FBgn0004907	14-3-3zeta
FBgn0011741	Arp6
FBgn0030081	CG7246
FBgn0024188	san
FBgn0001961	Arpc1
FBgn0033884	CG13344
FBgn0050273	CG30273
FBgn0030120	CG17440
FBgn0028897	CG4935
FBgn0032409	Ced-12
FBgn0265487	mbl
FBgn0039654	Brd8
FBgn0011659	Mlh1
FBgn0029970	Nek2
FBgn0033761	CG8778
FBgn0038877	CG3308
FBgn0039861	pasha
FBgn0015806	S6k
FBgn0033194	Vps13
FBgn0026713	l(1)G0007
FBgn0003330	Sce
FBgn0040534	CG11985
FBgn0005683	pie
FBgn0086356	tum
FBgn0053526	PNUTS
FBgn0027503	CG11970
FBgn0263593	Lpin
FBgn0026324	Taf10b
FBgn0028689	Rpn6
FBgn0010379	Akt1
FBgn0032596	Prosbeta4
FBgn0260439	Pp2A-29B
FBgn0034537	DMAP1
FBgn0010220	Dbp45A
FBgn0014127	barr
FBgn0039904	Hcf
FBgn0086757	cbs
FBgn0017550	Rga
FBgn0026433	Grip128
FBgn0040298	Myt1
FBgn0038742	Arc42
FBgn0036134	fd68A
FBgn0031050	Arp10
FBgn0004362	HmgD
FBgn0264326	DNApol-epsilon
FBgn0050077	blos1
FBgn0035111	CG16940
FBgn0037911	CG10898
FBgn0025682	scf
FBgn0015509	lin19
FBgn0052857	CG32857
FBgn0037931	CG18476
FBgn0000212	brm
FBgn0036126	CG6272
FBgn0027495	CG8378
FBgn0011703	RnrL
FBgn0035630	CG10576
FBgn0011232	scat
FBgn0040290	RecQ4
FBgn0038951	CG5380
FBgn0003567	su(Hw)
FBgn0035997	phol
FBgn0025140	pit
FBgn0264848	vih
FBgn0011770	Gip
FBgn0011837	Tis11
FBgn0023509	mip130
FBgn0011586	e(r)
FBgn0002542	lds
FBgn0037338	Snm1
FBgn0001990	wek
FBgn0014184	Oda
FBgn0031817	CG9531
FBgn0031876	Atac1
FBgn0020305	dbe
FBgn0260444	Not10
FBgn0028978	trbl
FBgn0030555	Fbxl4
FBgn0037981	Spt3
FBgn0036124	CG7839
FBgn0010406	RNaseX25
FBgn0032202	CG18619
FBgn0035603	CG10635
FBgn0028690	Rpn5
FBgn0035238	CG12104
FBgn0261385	scra
FBgn0023180	Orc6
FBgn0000996	dup
FBgn0037141	DNApol-eta
FBgn0015239	Hr78
FBgn0015621	Clp
FBgn0036188	CG7339
FBgn0032295	CG12299
FBgn0010109	dpn
FBgn0024321	NK7.1
FBgn0033528	trsn
FBgn0032171	CG5846
FBgn0015282	Rpt2
FBgn0030208	PPP4R2r
FBgn0002891	mus205
FBgn0034577	cpa
FBgn0033233	Kdm4A
FBgn0038889	CG7922
FBgn0015618	Cdk8
FBgn0265351	nac
FBgn0003475	spir
FBgn0025641	DAAM
FBgn0037794	CG6254
FBgn0026428	HDAC6
FBgn0031947	CG7154
FBgn0015299	Ssb-c31a
FBgn0023181	Orc4
FBgn0005427	ewg
FBgn0002673	twe
FBgn0039802	dj-1beta
FBgn0264492	CkIIalpha
FBgn0033741	CG8545
FBgn0022699	D19B
FBgn0039115	CG10214
FBgn0041775	tral
FBgn0014022	Rlb1
FBgn0033890	Ctf4
FBgn0037008	mTerf3
FBgn0029173	fu2
FBgn0024288	Sox100B
FBgn0035520	CG11586
FBgn0038461	CG3678
FBgn0002526	LanA
FBgn0003134	Pp1alpha-96A
FBgn0024227	ial
FBgn0001974	l(2)35Bd
FBgn0037894	Ranbp9
FBgn0037802	Sirt6
FBgn0003360	sesB
FBgn0010772	Xe7
FBgn0003391	shg
FBgn0025630	CG4061
FBgn0011660	Pms2
FBgn0028694	Rpn11
FBgn0032882	Ns4
FBgn0261397	didum
FBgn0003371	sgg
FBgn0263749	CG43674
FBgn0036386	CG8833
FBgn0011745	Arp1
FBgn0004635	rho
FBgn0025635	CG17829
FBgn0026192	par-6
FBgn0038788	Sirt2
FBgn0016977	spen
FBgn0037717	CG8301
FBgn0003268	rod
FBgn0004395	unk
FBgn0039635	CG11876
FBgn0004655	wapl
FBgn0032130	CG3838
FBgn0039019	HP1c
FBgn0004087	Dhfr
FBgn0000723	Fps85D
FBgn0052451	SPoCk
FBgn0032216	CG5384
FBgn0027581	CG6191
FBgn0015527	pen
FBgn0004106	cdc2
FBgn0011300	babo
FBgn0004860	ph-d
FBgn0024889	Kap-alpha1
FBgn0038576	Arp5
FBgn0035449	CG14971
FBgn0003169	put
FBgn0026401	Nipped-B
FBgn0000097	aop
FBgn0037531	CG10445
FBgn0028684	Rpt5
FBgn0050269	CG30269
FBgn0000163	baz
FBgn0262160	CG9932
FBgn0033349	CG8243
FBgn0011726	tsr
FBgn0020496	CtBP
FBgn0037897	CG5270
FBgn0020309	crol
FBgn0037382	Hpr1
FBgn0004647	N
FBgn0026582	CG9418
FBgn0011225	jar
FBgn0041100	park
FBgn0027490	D12
FBgn0030268	Klp10A
FBgn0011704	RnrS
FBgn0023171	rnh1
FBgn0038965	mats
FBgn0036856	CG9666
FBgn0051852	Tap42
FBgn0032517	CG7099
FBgn0011236	ken
FBgn0000181	bic
FBgn0033081	geminin
FBgn0034814	CG9890
FBgn0266111	ana3
FBgn0032475	Sfmbt
FBgn0038167	lkb1
FBgn0030530	jub
FBgn0263831	Gen
FBgn0029133	REG
FBgn0036843	CG6812
FBgn0033557	CG12325
FBgn0033351	CG8235
FBgn0261836	Msp-300
FBgn0031607	CG15440
FBgn0016081	fry
FBgn0027592	MED15
FBgn0041210	HDAC4
FBgn0032699	CG10383
FBgn0037751	topi
FBgn0033846	mip120
FBgn0040283	SMC1
FBgn0023216	Parg
FBgn0015799	Rbf
FBgn0032940	Mio
FBgn0035691	CG7386
FBgn0011656	Mef2
FBgn0028360	l(1)G0148
FBgn0010314	Cks30A
FBgn0030276	Dlic
FBgn0003716	tkv
FBgn0013799	Deaf1
FBgn0038046	CG5641
FBgn0030053	CG12081
FBgn0029861	CG3815
FBgn0030121	Cfp1
FBgn0026577	CG8677
FBgn0042173	CG18853
FBgn0034939	thoc5
FBgn0005640	Eip63E
FBgn0037901	CG6744
FBgn0030871	CG8142
FBgn0037490	CG10053
FBgn0020412	JIL-1
FBgn0034985	CG3328
FBgn0015589	Apc
FBgn0038810	Srp72
FBgn0032244	RfC3
FBgn0025186	ari-2
FBgn0005386	ash1
FBgn0035150	Rev1
FBgn0051301	CG31301
FBgn0002973	numb
FBgn0038183	CG9286
FBgn0263198	Acn
FBgn0034982	CG4065
FBgn0031606	CG15439
FBgn0035121	Tudor-SN
FBgn0037369	CG2100
FBgn0037301	Mms19
FBgn0041164	armi
FBgn0261565	Lmpt
FBgn0264694	mgr
FBgn0038806	CG5412
FBgn0261238	Alh
FBgn0034937	fzr2
FBgn0029977	hdm
FBgn0032723	ssp3
FBgn0031776	CG13993
FBgn0032847	Taf13
FBgn0025382	Rab27
FBgn0003886	alphaTub85E
FBgn0029881	pigs
FBgn0014861	Mcm2
FBgn0263594	lost
FBgn0034520	lms
FBgn0030240	CG2202
FBgn0026777	Rad23
FBgn0015546	spel1
FBgn0035644	Pole2
FBgn0031874	CG13775
FBgn0027950	MBD-like
FBgn0028695	Rpn1
FBgn0260768	CG42566
FBgn0003138	Ptp61F
FBgn0004584	Rrp1
FBgn0015279	Pi3K92E
FBgn0031952	cdc14
FBgn0266450	Kr-h1
FBgn0042085	Bap170
FBgn0020304	drongo
FBgn0025815	Mcm6
FBgn0029833	CG5941
FBgn0261112	APP-BP1
FBgn0034976	CG4049
FBgn0004913	Gnf1
FBgn0031094	CG9578
FBgn0029174	FKBP59
FBgn0086129	snama
FBgn0038961	CG13850
FBgn0019686	lok
FBgn0002441	l(3)mbt
FBgn0000147	aur
FBgn0015374	crl
FBgn0034691	synj
FBgn0030082	HP1b
FBgn0002914	Myb
FBgn0004101	bs
FBgn0033273	Gasz
FBgn0051040	Cog7
FBgn0032391	escl
FBgn0010825	Gug
FBgn0038389	CG5516
FBgn0032169	CG4709
FBgn0038767	trem
FBgn0263930	dally
FBgn0037363	Atg17
FBgn0015240	Hr96
FBgn0038760	MED25
FBgn0027599	CG2790
FBgn0004378	Klp61F
FBgn0005694	Aef1
FBgn0028692	Rpn2
FBgn0033029	Not3
FBgn0027378	MRG15
FBgn0032906	RPA2
FBgn0016917	Stat92E
FBgn0029798	CG4078
FBgn0019972	Ice
FBgn0034763	RYBP
FBgn0033317	CG8635
FBgn0038327	Trax
FBgn0000413	da
FBgn0033540	Elp2
FBgn0034726	Mes4
FBgn0038244	CG7987
FBgn0025874	Meics
FBgn0038769	CG10889
FBgn0027602	CG8611
FBgn0037018	CG4042
FBgn0039044	p53
FBgn0039920	CG11360
FBgn0027508	Tnks
FBgn0037202	Ssl1
FBgn0010316	dap
FBgn0013984	InR
FBgn0033427	CG1868
FBgn0038723	CG6195
FBgn0034707	MED16
FBgn0037816	CG6345
FBgn0266369	Mtp
FBgn0035849	ERR
FBgn0036522	CG7372
FBgn0039227	polybromo
FBgn0000520	dwg
FBgn0040372	G9a
FBgn0040347	mus81
FBgn0027620	Acf1
FBgn0042205	CG18764
FBgn0033122	CG17002
FBgn0004597	CycC
FBgn0032401	Plzf
FBgn0005624	Psc
FBgn0029911	CG14435
FBgn0000588	esc
FBgn0027499	wde
FBgn0020622	Pi3K21B
FBgn0023094	cyc
FBgn0035106	rno
FBgn0263391	hts
FBgn0020887	Su(z)12
FBgn0000228	Bsg25D
FBgn0011606	Klp3A
FBgn0026431	Grip75
FBgn0041627	Ku80
FBgn0262699	rap
FBgn0011291	Taf11
FBgn0052280	CG32280
FBgn0002521	pho
FBgn0010328	woc
FBgn0036004	Jarid2
FBgn0026371	SAK
FBgn0260012	pds5
FBgn0045035	tefu
FBgn0033972	Ciao1
FBgn0039863	CG1815
FBgn0000308	chic
FBgn0015625	CycB3
FBgn0004875	enc
FBgn0034802	CG3800
FBgn0030674	CG8184
FBgn0036356	CG10222
FBgn0032679	bsf
FBgn0017577	Mcm5
FBgn0029936	CG4617
FBgn0027375	RecQ5
FBgn0038524	sll
FBgn0067861	Sdic1
FBgn0034704	CG6758
FBgn0037700	CG8149
FBgn0038976	CG7048
FBgn0013765	cnn
FBgn0011481	Ssdp
FBgn0260639	gammaTub23C
FBgn0000611	exd
FBgn0010501	Dcp-1
FBgn0264075	tgo
FBgn0034002	CG8079
FBgn0035110	thoc7
FBgn0031189	CG14618
FBgn0036450	CG13472
FBgn0051368	CG31368
FBgn0263112	Mitf
FBgn0015331	abs
FBgn0031885	Mnn1
FBgn0033169	CG11123
FBgn0015271	Orc5
FBgn0026873	MED18
FBgn0037578	CG9601
FBgn0014029	2002-09-01
FBgn0034430	mip40
FBgn0014037	Su(Tpl)
FBgn0037051	CG10565
FBgn0005672	spi
FBgn0039117	tst
FBgn0019968	Khc-73
FBgn0002787	Rpn8
FBgn0010228	HmgZ
FBgn0028579	phtf
FBgn0028497	CG3530
FBgn0035232	CG12099
FBgn0037236	Skp2
FBgn0013733	shot
FBgn0024491	Bin1
FBgn0263510	nclb
FBgn0038704	CG5316
FBgn0010504	kermit
FBgn0003964	usp
FBgn0015270	Orc2
FBgn0039698	CG7789
FBgn0003124	polo
FBgn0028387	chm
FBgn0005198	gig
FBgn0035601	Uev1A
FBgn0002899	mus301
FBgn0033539	Git
FBgn0011642	Zyx
FBgn0010575	sbb
FBgn0004919	gol
FBgn0002878	mus101
FBgn0037087	CG7519
FBgn0082831	pps
FBgn0015925	csul
FBgn0003227	rec
FBgn0016641	PTP-ER
FBgn0032256	RluA-2
FBgn0030788	Sap30
FBgn0025111	Ant2
FBgn0031378	CG15362
FBgn0031631	CG3225
FBgn0032157	Etl1
FBgn0026317	Tsc1
FBgn0032961	CG1416
FBgn0000273	Pka-C1
FBgn0085432	pan
FBgn0005355	Su(fu)
FBgn0029134	Prosbeta5
FBgn0034176	ste24a
FBgn0039466	CG5521
FBgn0033010	Atf6
FBgn0032250	holn1
FBgn0036263	thoc6
FBgn0026738	CG7857
FBgn0002121	l(2)gl
FBgn0034878	pita
FBgn0003885	alphaTub84D
FBgn0001941	ifc
FBgn0033549	mms4
FBgn0266282	jnj
FBgn0038577	CG12321
FBgn0036405	CG6833
FBgn0262866	S6kII
FBgn0024732	Drep-1
FBgn0025808	Rad17
FBgn0052581	CG32581
FBgn0086134	Prosalpha2
FBgn0000711	flw
FBgn0039735	CG7911
FBgn0015379	dod
FBgn0031250	Ent1
FBgn0013753	Bgb
FBgn0004832	Xpac
FBgn0052706	CG32706
FBgn0052296	Mrtf
FBgn0040080	raps
FBgn0024196	robl
FBgn0015269	Nf1
FBgn0013726	pnut
FBgn0003866	tsh
FBgn0013764	Chi
FBgn0036661	CG9705
FBgn0037279	CG1129
FBgn0029006	lack
FBgn0014949	btn
FBgn0028992	sds22
FBgn0026086	Adar
FBgn0038608	WRNexo
FBgn0014010	Rab5
FBgn0015075	Ddx1
FBgn0036486	Msh6
FBgn0037703	JHDM2
FBgn0020493	Dad
FBgn0263745	CR43670
FBgn0044020	Roc2
FBgn0034761	CG4250
FBgn0036640	nxf2
FBgn0031652	jet
FBgn0004373	fwd
FBgn0036580	PDCD-5
FBgn0039631	Sirt7
FBgn0027529	CG8920
FBgn0030241	feo
FBgn0038390	Rbf2
FBgn0029152	Mkrn1
FBgn0001332	L
FBgn0003888	betaTub60D
FBgn0014342	mia
FBgn0004390	RasGAP1
FBgn0041111	lilli
FBgn0260959	MCPH1
FBgn0003480	spn-B
FBgn0028397	Tob
FBgn0031344	CG7420
FBgn0020270	mre11
FBgn0002707	mei-9
FBgn0033636	tou
FBgn0265623	Su(z)2
FBgn0000140	asp
FBgn0029912	CG4557
FBgn0024510	dlt
FBgn0026361	2005-09-01
FBgn0050389	CG30389
FBgn0051922	CG31922
FBgn0032883	CG9323
FBgn0051156	CG31156
FBgn0039056	CenB1A
FBgn0039932	fuss
FBgn0011205	fbl
FBgn0011826	Pp2B-14D
FBgn0000043	Act42A
FBgn0022786	Hira
FBgn0001612	l(1)dd4
FBgn0031610	CG15436
FBgn0003978	vls
FBgn0039209	CG13624
FBgn0001169	H
FBgn0040268	Top3alpha
FBgn0023515	CG14814
FBgn0033475	CG12129
FBgn0040344	CG3711
FBgn0086358	Tab2
FBgn0026379	Pten
FBgn0031637	CG2950
FBgn0035838	ldbr
FBgn0259984	kuz
FBgn0040239	bc10
FBgn0029693	CG6379
FBgn0021875	Zfrp8
FBgn0031575	Cep97
FBgn0053193	sav
FBgn0002466	sti
FBgn0266411	sima
FBgn0035024	CG11414
FBgn0024432	Dlc90F
FBgn0261451	trol
FBgn0034008	CG8152
FBgn0028509	CenG1A
FBgn0262937	Rabex-5
FBgn0020261	pcm
FBgn0027864	Ogg1
FBgn0052396	CG32396
FBgn0029903	pod1
FBgn0011297	l(2)not
FBgn0030693	CG8974
FBgn0003444	smo
FBgn0022361	Pur-alpha
FBgn0011739	wts
FBgn0026598	Apc2
FBgn0011692	pav
FBgn0014020	Rho1
