# Supplementary material for: A map of directional genetic interactions in a metazoan cell
Source: eLife. 2015 Mar 6;4:e05464. doi: 10.7554/eLife.05464 (PMC4384530; doi:10.7554/eLife.05464)
Supplement: Supplementary file 6. — A table of directed genetic interactions. DOI: http://dx.doi.org/10.7554/eLife.05464.024 [file elife05464s006.xlsx]

## Sheet: directedEpistaticInteractions.t
Supplemental Table S6. Directed genetic interactions
geneFrom	A depletion of geneFrom is changing the phenotypic effect of geneTo
geneTo	A depletion of geneFrom is changing the phenotypic effect of geneTo
effect	A depletion of geneFrom is alleviating or aggravating the phenotype of geneTo
geneFrom	geneTo	effect
CG31156	Cctgamma	aggravating
CG31156	Cct5	aggravating
CG31156	Rpn2	aggravating
CG31156	Mat89Ba	aggravating
CG31156	alph	alleviating
CG31156	Elongin-C	aggravating
CG31156	Tcp-1zeta	aggravating
CG31156	Sept2	aggravating
CG31156	pps	alleviating
CG31156	CG5525	aggravating
CG31156	Rho1	aggravating
CG31156	CG10418	aggravating
lilli	pav	aggravating
lilli	Rpn11	aggravating
lilli	Hel25E	aggravating
lilli	Hlc	aggravating
lilli	sti	aggravating
lilli	polo	aggravating
lilli	Dis3	aggravating
lilli	Pop2	aggravating
lilli	Rpn2	aggravating
lilli	CG7154	aggravating
lilli	ncm	aggravating
lilli	alph	alleviating
lilli	CG12325	aggravating
lilli	HLH106	aggravating
lilli	Rpn8	aggravating
lilli	Rho1	aggravating
nonC	alien	alleviating
nonC	ial	alleviating
nonC	spen	aggravating
nonC	CSN5	alleviating
Axn	Taf6	alleviating
Axn	Bap60	alleviating
Axn	me31B	alleviating
Axn	ial	alleviating
Axn	brm	alleviating
Axn	Taf1	alleviating
Axn	Upf1	alleviating
Axn	Snr1	alleviating
Axn	Cdk12	alleviating
Axn	mor	alleviating
Dlic	pds5	alleviating
Dlic	pav	alleviating
Dlic	drosha	alleviating
Dlic	pasha	alleviating
Dlic	CenB1A	alleviating
Dlic	Rho1	alleviating
e(y)1	CG6833	alleviating
e(y)1	Taf6	alleviating
e(y)1	Taf2	alleviating
e(y)1	CG6712	alleviating
e(y)1	l(2)37Cc	alleviating
e(y)1	CG10324	alleviating
e(y)1	ial	alleviating
e(y)1	Taf5	alleviating
e(y)1	SMC2	alleviating
e(y)1	Nup75	alleviating
e(y)1	Taf1	alleviating
e(y)1	Mad1	alleviating
e(y)1	Mat89Ba	alleviating
e(y)1	pont	alleviating
e(y)1	Taf4	alleviating
e(y)1	CenG1A	alleviating
e(y)1	l(1)10Bb	alleviating
e(y)1	DNApol-delta	alleviating
e(y)1	Rrp42	alleviating
e(y)1	RpII33	alleviating
e(y)1	Taf12	alleviating
e(y)1	Gnf1	alleviating
e(y)1	Rrp45	alleviating
e(y)1	Mcm7	alleviating
e(y)1	Cdk9	alleviating
e(y)1	MED11	alleviating
e(y)1	Nup133	alleviating
e(y)1	Rho1	alleviating
e(y)1	CG10418	alleviating
Myb	Taf6	alleviating
Myb	skd	alleviating
Myb	pav	alleviating
Myb	alien	alleviating
Myb	sqh	alleviating
Myb	Nnp-1	alleviating
Myb	e(y)1	alleviating
Myb	CG7246	alleviating
Myb	Tor	alleviating
Myb	l(2)37Cc	alleviating
Myb	Elp1	alleviating
Myb	Ssb-c31a	alleviating
Myb	sti	alleviating
Myb	sd	alleviating
Myb	l(2)03709	alleviating
Myb	skpA	alleviating
Myb	Rel	alleviating
Myb	CSN6	alleviating
Myb	Mat89Ba	alleviating
Myb	glu	alleviating
Myb	Sin	alleviating
Myb	CG10333	alleviating
Myb	dia	alleviating
Myb	feo	alleviating
Myb	CG9175	alleviating
Myb	RN-tre	alleviating
Myb	Skp2	alleviating
Myb	mit(1)15	alleviating
Myb	scra	alleviating
Myb	Nxt1	alleviating
Myb	gig	alleviating
Myb	Rrp45	alleviating
Myb	PNUTS	alleviating
Myb	tum	alleviating
Myb	Rho1	alleviating
Myb	Git	alleviating
Myb	CSN3	alleviating
SMC2	RPA2	alleviating
pds5	36038	aggravating
CG5800	pav	aggravating
CG5800	feo	aggravating
CG5800	scra	aggravating
CG5800	Rho1	aggravating
Rrp47	CG8368	aggravating
jumu	SMC1	aggravating
jumu	lin-52	aggravating
jumu	36038	aggravating
jumu	CtBP	alleviating
Cdc23	pds5	alleviating
Cdc23	srp	alleviating
Cdc23	skd	alleviating
Cdc23	pav	alleviating
Cdc23	alien	alleviating
Cdc23	Bka	alleviating
Cdc23	CG8184	alleviating
Cdc23	kz	alleviating
Cdc23	Nnp-1	alleviating
Cdc23	Nap1	alleviating
Cdc23	me31B	alleviating
Cdc23	CG6843	alleviating
Cdc23	Hlc	alleviating
Cdc23	Ssb-c31a	alleviating
Cdc23	CG3224	alleviating
Cdc23	Grip75	alleviating
Cdc23	sti	alleviating
Cdc23	Tif-IA	alleviating
Cdc23	CG13097	alleviating
Cdc23	Dbp73D	alleviating
Cdc23	SMC2	alleviating
Cdc23	CG7839	alleviating
Cdc23	Cdc16	alleviating
Cdc23	CG8545	alleviating
Cdc23	Arpc2	alleviating
Cdc23	CG11180	alleviating
Cdc23	gro	alleviating
Cdc23	CSN6	alleviating
Cdc23	kis	alleviating
Cdc23	Rrp4	alleviating
Cdc23	MED8	alleviating
Cdc23	Mat89Ba	alleviating
Cdc23	glu	alleviating
Cdc23	Mes4	alleviating
Cdc23	dm	alleviating
Cdc23	Mys45A	alleviating
Cdc23	ttk	alleviating
Cdc23	CG7339	alleviating
Cdc23	CG12325	alleviating
Cdc23	CG5380	alleviating
Cdc23	sesB	alleviating
Cdc23	Skp2	alleviating
Cdc23	Rs1	alleviating
Cdc23	CG33051	alleviating
Cdc23	l(2)k09022	alleviating
Cdc23	Rae1	alleviating
Cdc23	scra	alleviating
Cdc23	Rbf	alleviating
Cdc23	CenB1A	alleviating
Cdc23	ida	alleviating
Cdc23	tum	alleviating
Cdc23	spt4	alleviating
Cdc23	mr	alleviating
Cdc23	CG7275	alleviating
Cdc23	Nup133	alleviating
Cdc23	Rho1	alleviating
Cdc23	lin19	alleviating
Cdc23	Pten	alleviating
Cdc23	pr-set7	alleviating
CG7839	pit	alleviating
drosha	CycD	aggravating
drosha	sti	aggravating
drosha	Skp2	aggravating
drosha	CtBP	aggravating
ssp3	CG8605	aggravating
ssp3	baf	aggravating
MED22	DMAP1	alleviating
MED22	RPA2	alleviating
MED22	Taf6	alleviating
MED22	pav	alleviating
MED22	sds22	alleviating
MED22	sqh	alleviating
MED22	CycK	alleviating
MED22	CG5800	alleviating
MED22	Ts	alleviating
MED22	e(y)1	alleviating
MED22	Taf2	alleviating
MED22	Cwc25	alleviating
MED22	Rpb4	alleviating
MED22	mRNA-cap	alleviating
MED22	Sos	alleviating
MED22	gammaTub23C	alleviating
MED22	Hel25E	alleviating
MED22	rok	alleviating
MED22	Taf8	alleviating
MED22	Brms1	alleviating
MED22	l(2)35Df	alleviating
MED22	kto	alleviating
MED22	Grip75	alleviating
MED22	sti	alleviating
MED22	ial	alleviating
MED22	Tif-IA	alleviating
MED22	CG13097	alleviating
MED22	fs(1)h	alleviating
MED22	Taf5	alleviating
MED22	SMC2	alleviating
MED22	Dis3	alleviating
MED22	CG8545	alleviating
MED22	CG6345	alleviating
MED22	Rtf1	alleviating
MED22	l(2)03709	alleviating
MED22	rush	alleviating
MED22	Ced-12	alleviating
MED22	Incenp	alleviating
MED22	Cap-D2	alleviating
MED22	Caf1-180	alleviating
MED22	MED19	alleviating
MED22	Taf7	alleviating
MED22	Dcp2	alleviating
MED22	RpII18	alleviating
MED22	Bub3	alleviating
MED22	Upf2	alleviating
MED22	Rrp4	alleviating
MED22	SCAP	alleviating
MED22	MED8	alleviating
MED22	CG5757	alleviating
MED22	Mat89Ba	alleviating
MED22	glu	alleviating
MED22	MED10	alleviating
MED22	Cdc5	alleviating
MED22	Bx42	alleviating
MED22	Rpb7	alleviating
MED22	Spt5	alleviating
MED22	Rcc1	alleviating
MED22	l(1)10Bb	alleviating
MED22	ncm	alleviating
MED22	DNApol-delta	alleviating
MED22	Rrp42	alleviating
MED22	CG12267	alleviating
MED22	CG5380	alleviating
MED22	CG1789	alleviating
MED22	Rpb11	alleviating
MED22	CG1785	alleviating
MED22	Prp18	alleviating
MED22	RpII33	alleviating
MED22	TfIIFalpha	alleviating
MED22	Elongin-C	alleviating
MED22	spen	alleviating
MED22	sesB	alleviating
MED22	RN-tre	alleviating
MED22	Rpb5	alleviating
MED22	Skp2	alleviating
MED22	CG11985	alleviating
MED22	MED28	alleviating
MED22	Nop56	alleviating
MED22	RpI12	alleviating
MED22	barr	alleviating
MED22	Taf12	alleviating
MED22	CG33051	alleviating
MED22	Csl4	alleviating
MED22	Pp2A-29B	alleviating
MED22	Rae1	alleviating
MED22	Gnf1	alleviating
MED22	kin17	alleviating
MED22	CSN5	alleviating
MED22	Nxt1	alleviating
MED22	Rpb8	alleviating
MED22	Sin3A	alleviating
MED22	Upf1	alleviating
MED22	pnt	alleviating
MED22	Rrp45	alleviating
MED22	Mcm7	alleviating
MED22	CenB1A	alleviating
MED22	Cdk9	alleviating
MED22	l(2)37Cb	alleviating
MED22	Nipped-A	alleviating
MED22	Gl	alleviating
MED22	RpI1	alleviating
MED22	MED11	alleviating
MED22	tum	alleviating
MED22	RpIII128	alleviating
MED22	CtBP	alleviating
MED22	gw	alleviating
MED22	CrebB	alleviating
MED22	MED7	alleviating
MED22	BubR1	alleviating
MED22	pea	alleviating
MED22	CG7275	alleviating
MED22	CG2063	alleviating
MED22	Dsor1	alleviating
MED22	MED17	alleviating
MED22	Snr1	alleviating
MED22	mor	alleviating
MED22	l(2)37Cg	alleviating
MED22	dom	alleviating
MED22	Rho1	alleviating
MED22	RpII140	alleviating
MED22	CG9253	alleviating
MED22	pr-set7	alleviating
MED22	Clp	alleviating
MED22	Ran	alleviating
CG7172	pav	aggravating
CG7172	scra	aggravating
CG7172	S6k	alleviating
CG7172	Rho1	aggravating
Cdc16	pds5	alleviating
Cdc16	pav	alleviating
Cdc16	APC10	alleviating
Cdc16	kz	alleviating
Cdc16	Vps13	alleviating
Cdc16	Br140	alleviating
Cdc16	RfC4	alleviating
Cdc16	dalao	alleviating
Cdc16	kibra	alleviating
Cdc16	koi	alleviating
Cdc16	MED8	alleviating
Cdc16	CG8142	alleviating
Cdc16	feo	alleviating
Cdc16	RecQ4	alleviating
Cdc16	Skp2	alleviating
Cdc16	CG33051	alleviating
Cdc16	sgg	alleviating
Cdc16	Rbf	alleviating
Cdc16	gig	alleviating
Cdc16	CenB1A	alleviating
Cdc16	ida	alleviating
Cdc16	mr	alleviating
Cdc16	CG7275	alleviating
Cdc16	CG31687	alleviating
Cdc16	Tfb1	alleviating
Cdc16	Rho1	alleviating
Cdc16	lin19	alleviating
dalao	pasha	alleviating
dalao	Bap60	alleviating
dalao	brm	alleviating
dalao	Skp2	alleviating
dalao	CSN5	alleviating
dalao	CG2063	alleviating
dalao	mor	alleviating
dalao	Rho1	alleviating
alien	RPA2	alleviating
alien	Taf6	alleviating
alien	Nnp-1	alleviating
alien	l(2)37Cc	alleviating
alien	dup	alleviating
alien	CG10324	alleviating
alien	Taf5	alleviating
alien	CG8605	alleviating
alien	Dis3	alleviating
alien	l(2)03709	alleviating
alien	Incenp	alleviating
alien	Taf7	alleviating
alien	CSN6	alleviating
alien	PCNA	alleviating
alien	CoRest	alleviating
alien	Mys45A	alleviating
alien	Rrp42	alleviating
alien	Nxt1	alleviating
alien	Rrp45	alleviating
alien	Nipped-A	alleviating
alien	CG2063	alleviating
alien	Rho1	alleviating
SCAR	Fcp1	aggravating
SCAR	Taf1	aggravating
SCAR	dia	aggravating
SCAR	tum	aggravating
SCAR	lin19	aggravating
bel	Sos	alleviating
bel	Tif-IA	alleviating
bel	SCAP	alleviating
bel	phl	alleviating
CG10324	Sap130	alleviating
CG10324	srp	alleviating
CG10324	CG5316	alleviating
CG10324	RPA2	alleviating
CG10324	Taf6	alleviating
CG10324	sqh	alleviating
CG10324	Taf2	alleviating
CG10324	Rpb4	alleviating
CG10324	l(2)35Df	alleviating
CG10324	CycD	alleviating
CG10324	Taf5	alleviating
CG10324	CG8605	alleviating
CG10324	Dis3	alleviating
CG10324	CycT	alleviating
CG10324	Rtf1	alleviating
CG10324	l(2)03709	alleviating
CG10324	Bub3	alleviating
CG10324	Upf2	alleviating
CG10324	Rpd3	alleviating
CG10324	CG5757	alleviating
CG10324	MED10	alleviating
CG10324	Taf4	alleviating
CG10324	tws	alleviating
CG10324	Cdc5	alleviating
CG10324	CG4250	alleviating
CG10324	dia	alleviating
CG10324	Spt5	alleviating
CG10324	l(1)10Bb	alleviating
CG10324	ncm	alleviating
CG10324	DNApol-delta	alleviating
CG10324	tsr	alleviating
CG10324	Rpb11	alleviating
CG10324	CG42566	alleviating
CG10324	Rrp40	alleviating
CG10324	CG8368	alleviating
CG10324	Elongin-C	alleviating
CG10324	Taf12	alleviating
CG10324	Csl4	alleviating
CG10324	Gnf1	alleviating
CG10324	kin17	alleviating
CG10324	Nxt1	alleviating
CG10324	Rpb8	alleviating
CG10324	Upf1	alleviating
CG10324	Rrp45	alleviating
CG10324	Cdk9	alleviating
CG10324	l(2)37Cb	alleviating
CG10324	spt4	alleviating
CG10324	RpIII128	alleviating
CG10324	gw	alleviating
CG10324	CrebB	alleviating
CG10324	MED7	alleviating
CG10324	CG2063	alleviating
CG10324	Dsor1	alleviating
CG10324	MED17	alleviating
CG10324	RpII140	alleviating
CG10324	MED14	alleviating
msps	ial	aggravating
msps	Incenp	aggravating
msps	feo	alleviating
Arp3	pav	aggravating
Arp3	Sos	aggravating
Arp3	sti	aggravating
Arp3	Elongin-C	aggravating
Arp3	Skp2	aggravating
Arp3	Cdk9	aggravating
hpo	Rpn11	aggravating
hpo	Ts	aggravating
hpo	Nnp-1	aggravating
hpo	CG7033	aggravating
hpo	gammaTub23C	aggravating
hpo	Hel25E	aggravating
hpo	Hlc	aggravating
hpo	CG13097	aggravating
hpo	CG32344	aggravating
hpo	Dis3	aggravating
hpo	CG11180	aggravating
hpo	brm	aggravating
hpo	Nacalpha	aggravating
hpo	Vha55	aggravating
hpo	kis	alleviating
hpo	Mat89Ba	aggravating
hpo	Sin	aggravating
hpo	CG6197	aggravating
hpo	Cdc5	aggravating
hpo	ncm	aggravating
hpo	CG12325	aggravating
hpo	DAAM	alleviating
hpo	RpII33	aggravating
hpo	CrebB	alleviating
hpo	pea	aggravating
hpo	CG7275	aggravating
hpo	l(2)37Cg	aggravating
hpo	Rho1	aggravating
hpo	Dp	aggravating
Cdk5	sqh	aggravating
Cdk5	Ssb-c31a	alleviating
zfh1	RPA2	alleviating
zfh1	pav	alleviating
zfh1	alien	alleviating
zfh1	sds22	alleviating
zfh1	sqh	alleviating
zfh1	Tcp-1eta	alleviating
zfh1	Bap60	alleviating
zfh1	CycK	alleviating
zfh1	Rheb	alleviating
zfh1	me31B	alleviating
zfh1	CG7033	alleviating
zfh1	Cwc25	alleviating
zfh1	MED22	alleviating
zfh1	Taf10	alleviating
zfh1	Sos	alleviating
zfh1	l(2)37Cc	alleviating
zfh1	gammaTub23C	alleviating
zfh1	Hel25E	alleviating
zfh1	Wdr82	alleviating
zfh1	rok	alleviating
zfh1	RfC4	alleviating
zfh1	Hlc	alleviating
zfh1	CG10324	alleviating
zfh1	Myb	alleviating
zfh1	l(2)35Df	alleviating
zfh1	CycD	alleviating
zfh1	sti	alleviating
zfh1	dpa	alleviating
zfh1	ial	alleviating
zfh1	fs(1)h	alleviating
zfh1	Taf5	alleviating
zfh1	CG8605	alleviating
zfh1	polo	alleviating
zfh1	CG7172	alleviating
zfh1	Su(var)3-9	alleviating
zfh1	SMC2	alleviating
zfh1	CG32344	alleviating
zfh1	dalao	alleviating
zfh1	emb	alleviating
zfh1	Dis3	alleviating
zfh1	Dim1	alleviating
zfh1	CG8545	alleviating
zfh1	Brd8	alleviating
zfh1	Nup214	alleviating
zfh1	Rtf1	alleviating
zfh1	T-cp1	alleviating
zfh1	l(2)03709	alleviating
zfh1	Incenp	alleviating
zfh1	Cap-D2	alleviating
zfh1	skpA	alleviating
zfh1	msl-2	alleviating
zfh1	brm	alleviating
zfh1	Cctgamma	alleviating
zfh1	TfIIFbeta	alleviating
zfh1	ZC3H3	alleviating
zfh1	Nacalpha	alleviating
zfh1	Taf1	alleviating
zfh1	CG7006	alleviating
zfh1	Vha55	alleviating
zfh1	cdc2	alleviating
zfh1	pic	alleviating
zfh1	Upf2	alleviating
zfh1	CSN6	alleviating
zfh1	PCNA	alleviating
zfh1	RpII15	alleviating
zfh1	CG5757	alleviating
zfh1	glu	alleviating
zfh1	MED10	alleviating
zfh1	CoRest	alleviating
zfh1	Sin	alleviating
zfh1	Taf4	alleviating
zfh1	RpA-70	alleviating
zfh1	CG6197	alleviating
zfh1	Cdc5	alleviating
zfh1	Bx42	alleviating
zfh1	Rpb7	alleviating
zfh1	dia	alleviating
zfh1	Spt5	alleviating
zfh1	Pvr	alleviating
zfh1	nej	alleviating
zfh1	Ssrp	alleviating
zfh1	l(1)10Bb	alleviating
zfh1	Lam	alleviating
zfh1	ncm	alleviating
zfh1	DNApol-delta	alleviating
zfh1	feo	alleviating
zfh1	tsr	alleviating
zfh1	Rrp42	alleviating
zfh1	Klp61F	alleviating
zfh1	Rpb11	alleviating
zfh1	RpII33	alleviating
zfh1	CG3756	alleviating
zfh1	Elongin-C	alleviating
zfh1	sesB	alleviating
zfh1	Rpb5	alleviating
zfh1	Skp2	alleviating
zfh1	CG11985	alleviating
zfh1	Cdc37	alleviating
zfh1	barr	alleviating
zfh1	Csl4	alleviating
zfh1	Tcp-1zeta	alleviating
zfh1	stg	alleviating
zfh1	36038	alleviating
zfh1	Rae1	alleviating
zfh1	scra	alleviating
zfh1	Gnf1	alleviating
zfh1	Nxt1	alleviating
zfh1	Rpb8	alleviating
zfh1	Upf1	alleviating
zfh1	HLH106	alleviating
zfh1	Rrp45	alleviating
zfh1	Mcm7	alleviating
zfh1	ida	alleviating
zfh1	Nipped-A	alleviating
zfh1	mad2	alleviating
zfh1	geminin	alleviating
zfh1	Dmn	alleviating
zfh1	RpIII128	alleviating
zfh1	gw	alleviating
zfh1	BubR1	alleviating
zfh1	pea	alleviating
zfh1	CG2063	alleviating
zfh1	Dsor1	alleviating
zfh1	E(Pc)	alleviating
zfh1	MED17	alleviating
zfh1	RpII215	alleviating
zfh1	Snr1	alleviating
zfh1	mor	alleviating
zfh1	l(2)37Cg	alleviating
zfh1	dom	alleviating
zfh1	Rho1	alleviating
zfh1	RpII140	alleviating
zfh1	CG10418	alleviating
zfh1	Dp	alleviating
zfh1	pr-set7	alleviating
zfh1	Ran	alleviating
zfh1	CSN3	alleviating
Nup75	Sap130	aggravating
Nup75	jumu	aggravating
Nup75	Brms1	aggravating
Nup75	swm	aggravating
Nup75	Not3	aggravating
Nup75	Sin3A	aggravating
Nup75	CG7379	aggravating
Cap	Ssb-c31a	aggravating
Cap	EcR	alleviating
Cap	Hpr1	aggravating
Cap	Cdk9	aggravating
Cap	Fen1	aggravating
Cap	PPP4R2r	aggravating
Cap	CrebB	aggravating
CG5757	CycK	alleviating
CG5757	me31B	alleviating
CG5757	skpA	alleviating
CG5757	pont	alleviating
CG5757	Nipped-A	alleviating
CG5757	Rho1	alleviating
CG7154	sti	aggravating
CG7154	ial	aggravating
CG7154	dalao	aggravating
CG7154	Incenp	aggravating
CG7154	CG10333	aggravating
CG7154	dia	aggravating
CG7154	Skp2	aggravating
CG7154	Rpb8	aggravating
CG7154	geminin	aggravating
CG7154	CG2063	aggravating
CG7154	Snr1	aggravating
schlank	pav	alleviating
schlank	SMC2	alleviating
schlank	barr	alleviating
schlank	stg	alleviating
schlank	scra	alleviating
schlank	Gnf1	alleviating
schlank	geminin	alleviating
schlank	Rho1	alleviating
schlank	robl	alleviating
schlank	osa	alleviating
bip2	Sap130	aggravating
bip2	e(y)1	aggravating
bip2	MED30	aggravating
bip2	Nup214	alleviating
bip2	TfIIFbeta	aggravating
bip2	MED10	aggravating
bip2	Rpb7	aggravating
bip2	feo	aggravating
bip2	MED31	aggravating
bip2	ken	aggravating
bip2	Taf13	aggravating
bip2	CkIIalpha	aggravating
bip2	MED11	aggravating
bip2	Tsc1	aggravating
bip2	gw	aggravating
bip2	MED7	aggravating
bip2	CG8578	aggravating
bip2	MED17	aggravating
bip2	TfIIA-L	aggravating
CG6204	ial	aggravating
CG6204	CG32344	aggravating
CG6204	Rpn2	aggravating
CG6204	Mat89Ba	aggravating
CG6204	l(2)k09022	aggravating
Cctgamma	srp	alleviating
Cctgamma	RPA2	alleviating
Cctgamma	pav	alleviating
Cctgamma	sds22	alleviating
Cctgamma	sqh	alleviating
Cctgamma	Bka	alleviating
Cctgamma	APC10	alleviating
Cctgamma	Tcp-1eta	alleviating
Cctgamma	Bap60	alleviating
Cctgamma	CycK	alleviating
Cctgamma	CG7033	alleviating
Cctgamma	Taf2	alleviating
Cctgamma	sec5	alleviating
Cctgamma	MED22	alleviating
Cctgamma	mip120	alleviating
Cctgamma	CG6712	alleviating
Cctgamma	CG7246	alleviating
Cctgamma	l(2)37Cc	alleviating
Cctgamma	nop5	alleviating
Cctgamma	Wdr82	alleviating
Cctgamma	rok	alleviating
Cctgamma	CG4936	alleviating
Cctgamma	san	alleviating
Cctgamma	CG3224	alleviating
Cctgamma	sti	alleviating
Cctgamma	dpa	alleviating
Cctgamma	ial	alleviating
Cctgamma	CG13097	alleviating
Cctgamma	CG8605	alleviating
Cctgamma	CG7172	alleviating
Cctgamma	SMC2	alleviating
Cctgamma	MED30	alleviating
Cctgamma	dalao	alleviating
Cctgamma	CG7048	alleviating
Cctgamma	CG8545	alleviating
Cctgamma	Nup214	alleviating
Cctgamma	T-cp1	alleviating
Cctgamma	l(2)03709	alleviating
Cctgamma	rush	alleviating
Cctgamma	Ced-12	alleviating
Cctgamma	Cap-D2	alleviating
Cctgamma	skpA	alleviating
Cctgamma	brm	alleviating
Cctgamma	TfIIFbeta	alleviating
Cctgamma	Taf7	alleviating
Cctgamma	Pop2	alleviating
Cctgamma	Xpd	alleviating
Cctgamma	CG7006	alleviating
Cctgamma	Vha55	alleviating
Cctgamma	pic	alleviating
Cctgamma	RpI135	alleviating
Cctgamma	Cct5	alleviating
Cctgamma	kis	alleviating
Cctgamma	Rrp4	alleviating
Cctgamma	sw	alleviating
Cctgamma	CG5757	alleviating
Cctgamma	Mat89Ba	alleviating
Cctgamma	glu	alleviating
Cctgamma	CG8258	alleviating
Cctgamma	tws	alleviating
Cctgamma	dia	alleviating
Cctgamma	Rcc1	alleviating
Cctgamma	DNApol-delta	alleviating
Cctgamma	RanGAP	alleviating
Cctgamma	feo	alleviating
Cctgamma	tsr	alleviating
Cctgamma	Rrp42	alleviating
Cctgamma	CG12267	alleviating
Cctgamma	CG5380	alleviating
Cctgamma	CG1789	alleviating
Cctgamma	Rpb11	alleviating
Cctgamma	upSET	alleviating
Cctgamma	RfC3	alleviating
Cctgamma	CG11876	alleviating
Cctgamma	ken	alleviating
Cctgamma	TfIIFalpha	alleviating
Cctgamma	Rrp40	alleviating
Cctgamma	CG8368	alleviating
Cctgamma	CG3735	alleviating
Cctgamma	RecQ4	alleviating
Cctgamma	sesB	alleviating
Cctgamma	RN-tre	alleviating
Cctgamma	Skp2	alleviating
Cctgamma	CG11920	alleviating
Cctgamma	MED28	alleviating
Cctgamma	Sec61beta	alleviating
Cctgamma	Csl4	alleviating
Cctgamma	Tcp-1zeta	alleviating
Cctgamma	chic	alleviating
Cctgamma	36038	alleviating
Cctgamma	Rae1	alleviating
Cctgamma	Syx1A	alleviating
Cctgamma	scra	alleviating
Cctgamma	Gnf1	alleviating
Cctgamma	CSN5	alleviating
Cctgamma	Nxt1	alleviating
Cctgamma	Rrp45	alleviating
Cctgamma	Mcm7	alleviating
Cctgamma	CenB1A	alleviating
Cctgamma	CG7379	alleviating
Cctgamma	Nipped-A	alleviating
Cctgamma	enok	alleviating
Cctgamma	MED11	alleviating
Cctgamma	tum	alleviating
Cctgamma	RpIII128	alleviating
Cctgamma	CrebB	alleviating
Cctgamma	MED7	alleviating
Cctgamma	TfIIEbeta	alleviating
Cctgamma	CG7275	alleviating
Cctgamma	MED17	alleviating
Cctgamma	chb	alleviating
Cctgamma	Snr1	alleviating
Cctgamma	CG5525	alleviating
Cctgamma	mor	alleviating
Cctgamma	l(2)37Cg	alleviating
Cctgamma	dom	alleviating
Cctgamma	Rho1	alleviating
Cctgamma	CG10418	alleviating
Cctgamma	Rab5	alleviating
Cctgamma	lin19	alleviating
Cctgamma	DNApol-alpha50	alleviating
Cctgamma	robl	alleviating
Cctgamma	MED14	alleviating
Cctgamma	Bap55	alleviating
Cctgamma	Dbp45A	alleviating
CG10418	Taf6	alleviating
CG10418	Taf2	alleviating
CG10418	Rpb4	alleviating
CG10418	mRNA-cap	alleviating
CG10418	san	alleviating
CG10418	l(2)03709	alleviating
CG10418	ncm	alleviating
CG10418	RpII33	alleviating
CG10418	Rpb5	alleviating
CG10418	Nxt1	alleviating
CG10418	Cdk9	alleviating
CG10418	gw	alleviating
CG10418	MED7	alleviating
CG10418	pea	alleviating
CG10418	dom	alleviating
Pten	sqh	aggravating
Pten	Bap60	aggravating
Pten	CycK	aggravating
Pten	Cwc25	aggravating
Pten	sti	aggravating
Pten	glu	aggravating
Pten	Elongin-C	aggravating
Pten	CG11985	aggravating
Pten	gig	alleviating
Pten	Nipped-A	aggravating
Pten	BubR1	aggravating
Pten	chb	aggravating
cnc	pav	alleviating
cnc	ial	alleviating
cnc	Incenp	alleviating
cnc	RN-tre	alleviating
cnc	scra	alleviating
cnc	geminin	alleviating
cnc	mor	alleviating
Gl	numb	alleviating
Spt3	srp	aggravating
Spt3	sqh	aggravating
Spt3	Ts	aggravating
Spt3	Hel25E	aggravating
Spt3	ial	aggravating
Spt3	fs(1)h	aggravating
Spt3	Incenp	aggravating
Spt3	Cap-D2	aggravating
Spt3	PCNA	aggravating
Spt3	glu	aggravating
Spt3	Rpb7	aggravating
Spt3	dia	aggravating
Spt3	ncm	aggravating
Spt3	DNApol-delta	aggravating
Spt3	Klp61F	aggravating
Spt3	Skp2	aggravating
Spt3	CG11985	aggravating
Spt3	scra	aggravating
Spt3	Gnf1	aggravating
Spt3	tum	aggravating
Spt3	BubR1	aggravating
Spt3	pea	aggravating
Spt3	Snr1	aggravating
Spt3	Cdk12	aggravating
Spt3	mor	aggravating
Spt3	Rho1	aggravating
Spt3	CG11337	alleviating
Spt3	Nup153	aggravating
Spt3	Bap55	aggravating
Spt3	osa	aggravating
Dmn	numb	alleviating
Dmn	Pop2	alleviating
Dmn	CG8258	alleviating
Dmn	scra	alleviating
Dmn	Rho1	alleviating
Elongin-B	RPA2	alleviating
Elongin-B	Myb	alleviating
Elongin-B	skpA	alleviating
Elongin-B	brm	alleviating
Elongin-B	Cap	alleviating
Elongin-B	Pop2	alleviating
Elongin-B	RpII18	alleviating
Elongin-B	RpII15	alleviating
Elongin-B	glu	alleviating
Elongin-B	Rpb11	alleviating
Elongin-B	RpII33	alleviating
Elongin-B	Elongin-C	alleviating
Elongin-B	barr	alleviating
Elongin-B	Gnf1	alleviating
Elongin-B	Rrp45	alleviating
Elongin-B	Nipped-A	alleviating
Elongin-B	tum	alleviating
Elongin-B	BubR1	alleviating
Elongin-B	mor	alleviating
Elongin-B	Nup153	alleviating
Elongin-B	CG10418	alleviating
CG7656	CenB1A	alleviating
l(1)dd4	ald	aggravating
l(1)dd4	CG11337	alleviating
TfIIA-L	SMC2	alleviating
TfIIA-L	RpA-70	alleviating
TfIIA-L	DNApol-delta	alleviating
TfIIA-L	Prp18	alleviating
TfIIA-L	spen	alleviating
TfIIA-L	barr	alleviating
TfIIA-L	Pp2A-29B	alleviating
TfIIA-L	kin17	alleviating
TfIIA-L	Mcm7	alleviating
TfIIA-L	tum	alleviating
TfIIA-L	Snr1	alleviating
TfIIA-L	mor	alleviating
TfIIA-L	Rho1	alleviating
TfIIA-L	lin19	alleviating
Sas10	Rrp42	alleviating
CG9203	sti	aggravating
lwr	Ts	alleviating
lwr	Pop2	alleviating
lwr	Rpb11	alleviating
lwr	Rpb5	alleviating
lwr	gw	alleviating
lwr	Nup133	alleviating
Rae1	me31B	alleviating
Rae1	Pop2	alleviating
Grip84	Bub3	aggravating
Grip84	feo	alleviating
Apc2	RPA2	aggravating
Apc2	pav	aggravating
Apc2	CG10324	aggravating
Apc2	ial	aggravating
Apc2	fs(1)h	aggravating
Apc2	Incenp	aggravating
Apc2	MED19	aggravating
Apc2	Cdc27	aggravating
Apc2	RpII18	aggravating
Apc2	RpA-70	aggravating
Apc2	Rpb7	aggravating
Apc2	DNApol-delta	aggravating
Apc2	feo	aggravating
Apc2	Rpb5	aggravating
Apc2	Pp2A-29B	aggravating
Apc2	stg	aggravating
Apc2	scra	aggravating
Apc2	RpII215	aggravating
Apc2	dom	aggravating
Apc2	Rho1	aggravating
Apc2	Nup153	aggravating
Apc2	lin19	aggravating
Apc2	Ran	aggravating
DNApol-delta	DMAP1	alleviating
DNApol-delta	sqh	alleviating
DNApol-delta	Cap-D2	alleviating
DNApol-delta	brm	alleviating
DNApol-delta	Taf7	alleviating
DNApol-delta	Taf1	alleviating
DNApol-delta	ncm	alleviating
DNApol-delta	spen	alleviating
DNApol-delta	PPP4R2r	alleviating
DNApol-delta	CG2063	alleviating
DNApol-delta	CG10418	alleviating
Query65	sqh	aggravating
Prp18	Ts	alleviating
Prp18	RfC4	alleviating
Prp18	dia	alleviating
Prp18	Taf12	alleviating
Prp18	Gnf1	alleviating
Prp18	Nxt1	alleviating
Prp18	mor	alleviating
Prp18	DNApol-alpha50	alleviating
Skp2	Sap130	alleviating
scra	RPA2	alleviating
scra	CG7048	alleviating
scra	glu	alleviating
scra	dia	alleviating
scra	feo	alleviating
scra	Skp2	alleviating
Hnf4	pav	alleviating
Hnf4	ial	alleviating
Hnf4	Incenp	alleviating
Hnf4	ncm	alleviating
Hnf4	Klp61F	alleviating
Hnf4	mor	alleviating
Hnf4	Rho1	alleviating
Hnf4	Dp	alleviating
Hnf4	Ran	alleviating
RasGAP1	srp	aggravating
RasGAP1	sqh	aggravating
RasGAP1	Ts	aggravating
RasGAP1	Taf2	aggravating
RasGAP1	Hel25E	aggravating
RasGAP1	RfC4	aggravating
RasGAP1	fs(1)h	aggravating
RasGAP1	SMC2	aggravating
RasGAP1	Dis3	aggravating
RasGAP1	skpA	aggravating
RasGAP1	brm	aggravating
RasGAP1	TfIIFbeta	aggravating
RasGAP1	Nacalpha	aggravating
RasGAP1	PCNA	aggravating
RasGAP1	glu	aggravating
RasGAP1	RpA-70	aggravating
RasGAP1	tsr	aggravating
RasGAP1	Klp61F	aggravating
RasGAP1	Rpb5	aggravating
RasGAP1	Skp2	aggravating
RasGAP1	CG11985	aggravating
RasGAP1	barr	aggravating
RasGAP1	scra	aggravating
RasGAP1	Gnf1	aggravating
RasGAP1	Nxt1	aggravating
RasGAP1	Rrp45	aggravating
RasGAP1	l(2)37Cb	aggravating
RasGAP1	mad2	aggravating
RasGAP1	geminin	aggravating
RasGAP1	BubR1	aggravating
RasGAP1	CG2063	aggravating
RasGAP1	Snr1	aggravating
RasGAP1	mor	aggravating
RasGAP1	Rho1	aggravating
RasGAP1	CG10418	aggravating
RasGAP1	lin19	aggravating
RasGAP1	Ran	aggravating
CtBP	Sap130	aggravating
CtBP	Myb	aggravating
CtBP	Incenp	aggravating
CtBP	Rho1	aggravating
CG42566	CG31156	aggravating
esc	CG31156	aggravating
pnr	nonC	alleviating
Rpn11	Dlic	alleviating
polo	Dlic	alleviating
Bub3	Dlic	alleviating
Mad1	Dlic	alleviating
nej	Dlic	alleviating
vih	Dlic	alleviating
ald	Dlic	alleviating
Pp2A-29B	Dlic	alleviating
pnt	Dlic	alleviating
Rpn8	Dlic	alleviating
Ptp61F	e(y)1	aggravating
bs	e(y)1	aggravating
CG7518	Myb	aggravating
mip120	Myb	alleviating
polo	Myb	alleviating
fzy	Myb	alleviating
mip130	Myb	alleviating
rod	SMC2	aggravating
Dim1	SMC2	alleviating
RnrS	SMC2	alleviating
Rpn10	SMC2	alleviating
PCNA	SMC2	alleviating
Rpn5	SMC2	alleviating
CG8963	SMC2	alleviating
Pp2A-29B	SMC2	alleviating
RnrL	SMC2	alleviating
cdc2c	SMC2	alleviating
CycE	SMC2	alleviating
Rpn9	SMC2	alleviating
Nup153	SMC2	alleviating
Dp	SMC2	alleviating
Taf6	pds5	alleviating
e(y)1	pds5	alleviating
Rpb4	pds5	alleviating
CycT	pds5	alleviating
MED17	pds5	alleviating
MED14	pds5	alleviating
lwr	pds5	alleviating
Rlb1	CG5800	aggravating
CG17829	CG5800	aggravating
aur	CG5800	alleviating
Dlic	jumu	alleviating
Prosalpha3	jumu	alleviating
Rpt5	jumu	alleviating
Cdc27	jumu	alleviating
CkIIbeta	jumu	aggravating
Prosalpha2	jumu	alleviating
RecQ4	jumu	aggravating
RnrL	jumu	alleviating
CycE	jumu	alleviating
Dp	jumu	alleviating
Prosbeta4	jumu	alleviating
CG7420	Cdc23	aggravating
ial	Cdc23	alleviating
polo	Cdc23	alleviating
Dis3	Cdc23	alleviating
Nacalpha	Cdc23	alleviating
Taf1	Cdc23	alleviating
cdc2	Cdc23	alleviating
Taf4	Cdc23	alleviating
CG6197	Cdc23	alleviating
Cdc5	Cdc23	alleviating
Bx42	Cdc23	alleviating
Spt5	Cdc23	alleviating
Pvr	Cdc23	alleviating
ncm	Cdc23	alleviating
Sirt6	Cdc23	aggravating
Klp61F	Cdc23	alleviating
vih	Cdc23	alleviating
CG11985	Cdc23	alleviating
stg	Cdc23	alleviating
RnrL	Cdc23	alleviating
Sin3A	Cdc23	alleviating
tsh	Cdc23	aggravating
pea	Cdc23	alleviating
CG2063	Cdc23	alleviating
RpII215	Cdc23	alleviating
Cdk12	Cdc23	alleviating
RpII140	Cdc23	alleviating
CG10418	Cdc23	alleviating
Pvr	CG7839	alleviating
mgr	drosha	aggravating
CG31687	drosha	alleviating
rdx	ssp3	alleviating
Hcf	MED22	alleviating
mip120	MED22	alleviating
dup	MED22	alleviating
Lpt	MED22	aggravating
tai	MED22	aggravating
Aef1	MED22	aggravating
Rpn11	Cdc16	alleviating
Hel25E	Cdc16	alleviating
Taf1	Cdc16	alleviating
cdc2	Cdc16	alleviating
Cdc5	Cdc16	alleviating
Pvr	Cdc16	alleviating
Klp61F	Cdc16	alleviating
Prosalpha2	Cdc16	alleviating
CG11985	Cdc16	alleviating
pnt	Cdc16	alleviating
Rpn8	Cdc16	alleviating
E(Pc)	Cdc16	alleviating
RpII215	Cdc16	alleviating
Cdk12	Cdc16	alleviating
RpII140	Cdc16	alleviating
Prosbeta4	Cdc16	alleviating
Nup154	dalao	alleviating
shtd	dalao	alleviating
Cdc27	dalao	alleviating
RnrS	dalao	alleviating
Rpn10	dalao	alleviating
rno	dalao	aggravating
fzy	dalao	alleviating
cdc2c	dalao	alleviating
Clp	dalao	alleviating
Vps13	alien	aggravating
cdc2	alien	alleviating
stg	alien	alleviating
pps	alien	aggravating
fwd	alien	aggravating
Cdk8	alien	aggravating
MED18	alien	aggravating
lin19	alien	alleviating
CG5521	SCAR	alleviating
TfIIEbeta	SCAR	aggravating
hyd	CG10324	alleviating
dup	CG10324	alleviating
CG3224	CG10324	alleviating
Tif-IA	CG10324	alleviating
msps	CG10324	alleviating
mbf1	CG10324	aggravating
Klp67A	CG10324	alleviating
Aef1	Arp3	alleviating
CtBP	Cdk5	alleviating
CG10803	zfh1	aggravating
fd68A	zfh1	aggravating
dod	zfh1	aggravating
cdc2	Nup75	alleviating
gwl	Nup75	aggravating
Cog7	Nup75	alleviating
CtBP	Nup75	aggravating
CG3838	Nup75	alleviating
e(y)1	Cap	alleviating
MED27	Cap	alleviating
Prosalpha3	Cap	alleviating
Cap-D2	Cap	alleviating
Ssrp	Cap	alleviating
ncm	Cap	alleviating
RnrL	Cap	alleviating
ida	Cap	alleviating
dom	Cap	alleviating
asf1	Cap	alleviating
CG32344	CG5757	alleviating
RpII140	Cul-3	aggravating
CG5147	Cul-3	aggravating
Su(fu)	schlank	aggravating
spi	schlank	aggravating
CG3224	bip2	alleviating
Cdc16	bip2	alleviating
Klp67A	bip2	alleviating
mip120	CG10418	alleviating
Tor	CG10418	alleviating
CSN6	CG10418	alleviating
Rpn10	CG10418	alleviating
cdc2c	CG10418	alleviating
Rpn11	Gl	alleviating
Hlc	Gl	alleviating
emb	Gl	alleviating
Cdc5	Gl	alleviating
Rpb7	Gl	alleviating
Klp61F	Gl	alleviating
CG11985	Gl	alleviating
RnrL	Gl	alleviating
HLH106	Gl	alleviating
pnt	Gl	alleviating
Rpn8	Gl	alleviating
MED11	Gl	alleviating
BubR1	Gl	alleviating
Nup153	Gl	alleviating
Ran	Gl	alleviating
mRNA-cap	Dmn	alleviating
Mad1	Dmn	alleviating
ncm	Dmn	alleviating
l(3)mbt	par-6	aggravating
kis	CG7993	alleviating
Cdc5	l(1)dd4	alleviating
Pp2A-29B	l(1)dd4	alleviating
Cdc23	TfIIA-L	alleviating
mrn	TfIIA-L	aggravating
emb	Sas10	alleviating
rdx	Sas10	aggravating
RpII140	Sas10	alleviating
Tcp-1eta	robl	alleviating
Rpb4	robl	alleviating
T-cp1	robl	alleviating
Xpd	robl	alleviating
Cct5	robl	alleviating
Caf1	robl	alleviating
l(1)G0007	robl	alleviating
RpI12	robl	alleviating
Csl4	robl	alleviating
Nxt1	robl	alleviating
CG7379	robl	alleviating
MED11	robl	alleviating
MED7	robl	alleviating
TfIIEbeta	robl	alleviating
CG3815	robl	aggravating
MED14	robl	alleviating
c12.1	robl	alleviating
Oda	CG9203	alleviating
Dcr-1	Rae1	alleviating
sty	Rae1	aggravating
CkIIalpha	Rae1	aggravating
polo	Grip84	alleviating
G9a	Apc2	alleviating
dup	DNApol-delta	alleviating
CG32344	DNApol-delta	alleviating
msps	DNApol-delta	alleviating
Rif1	DNApol-delta	aggravating
Ino80	DNApol-delta	aggravating
CoRest	DNApol-delta	alleviating
CG9175	DNApol-delta	alleviating
Rs1	DNApol-delta	alleviating
Cdk8	DNApol-delta	alleviating
cg	Prp18	aggravating
CG31368	Prp18	aggravating
Tudor-SN	Prp18	aggravating
l(2)37Cg	Prp18	aggravating
Pten	Prp18	aggravating
mus210	Skp2	aggravating
Tcp-1eta	Skp2	alleviating
kz	Skp2	alleviating
Nnp-1	Skp2	alleviating
hyd	Skp2	alleviating
hd	Skp2	alleviating
Tor	Skp2	alleviating
CG31301	Skp2	aggravating
CG4065	Skp2	aggravating
msl-1	Skp2	alleviating
Ptp61F	Skp2	aggravating
Rpn6	Skp2	alleviating
CG32344	Skp2	alleviating
swm	Skp2	alleviating
Dim1	Skp2	alleviating
Prosalpha3	Skp2	alleviating
kibra	Skp2	aggravating
shtd	Skp2	alleviating
Cdc27	Skp2	alleviating
ncd	Skp2	alleviating
Rpt2	Skp2	alleviating
CDC45L	Skp2	alleviating
Rpn1	Skp2	alleviating
RpI135	Skp2	alleviating
RnrS	Skp2	alleviating
Sesn	Skp2	aggravating
SCAP	Skp2	alleviating
pont	Skp2	alleviating
Rpn5	Skp2	alleviating
Sin	Skp2	alleviating
Pur-alpha	Skp2	aggravating
Rcc1	Skp2	alleviating
rept	Skp2	alleviating
dm	Skp2	alleviating
Mys45A	Skp2	alleviating
pit	Skp2	alleviating
CG3756	Skp2	alleviating
CG9175	Skp2	alleviating
vih	Skp2	alleviating
RecQ4	Skp2	alleviating
Tcp-1zeta	Skp2	alleviating
RnrL	Skp2	alleviating
cdc2c	Skp2	alleviating
kin17	Skp2	alleviating
HLH106	Skp2	alleviating
PNUTS	Skp2	alleviating
ida	Skp2	alleviating
RpI1	Skp2	alleviating
CycE	Skp2	alleviating
mr	Skp2	alleviating
Rpn9	Skp2	alleviating
CG5525	Skp2	alleviating
CG9253	Skp2	alleviating
Dp	Skp2	alleviating
Elongin-B	Skp2	alleviating
Bap55	Skp2	alleviating
osa	Skp2	alleviating
mus210	scra	aggravating
alien	scra	alleviating
cutlet	scra	aggravating
Zyx	scra	aggravating
fs(2)ltoPP43	scra	aggravating
dup	scra	alleviating
CG9601	scra	aggravating
kibra	scra	aggravating
CG11902	scra	aggravating
Cdc27	scra	alleviating
koi	scra	alleviating
CG15561	scra	aggravating
CSN6	scra	alleviating
Rpn10	scra	alleviating
SCAP	scra	alleviating
Rpn5	scra	alleviating
CG7911	scra	aggravating
fzy	scra	alleviating
cdc2c	scra	alleviating
HLH106	scra	alleviating
Prosbeta5	scra	alleviating
Pka-C1	scra	aggravating
CycE	scra	alleviating
Rpn9	scra	alleviating
CSN3	scra	alleviating
MED15	CtBP	aggravating
