# Supplementary figures and images for: A map of directional genetic interactions in a metazoan cell
Source: eLife journal article supplement (doi:10.7554/elife.05464), 2015-03-06

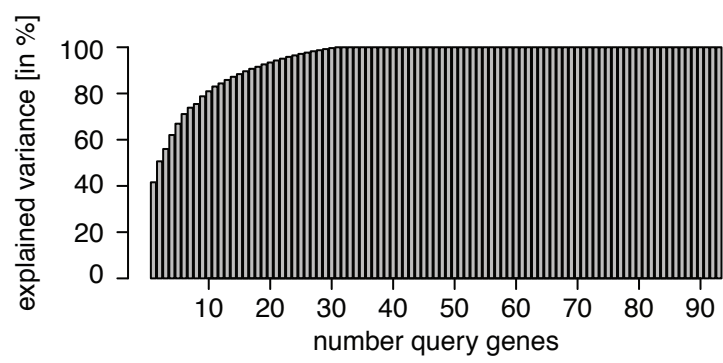

Figure 1 - figure supplement 1

Supplement: supp [file elife_poa_e05464_Figure_1_figure_supplement_1.pdf › elife_poa_e05464_Figure_1_figure_supplement_1.pdf]

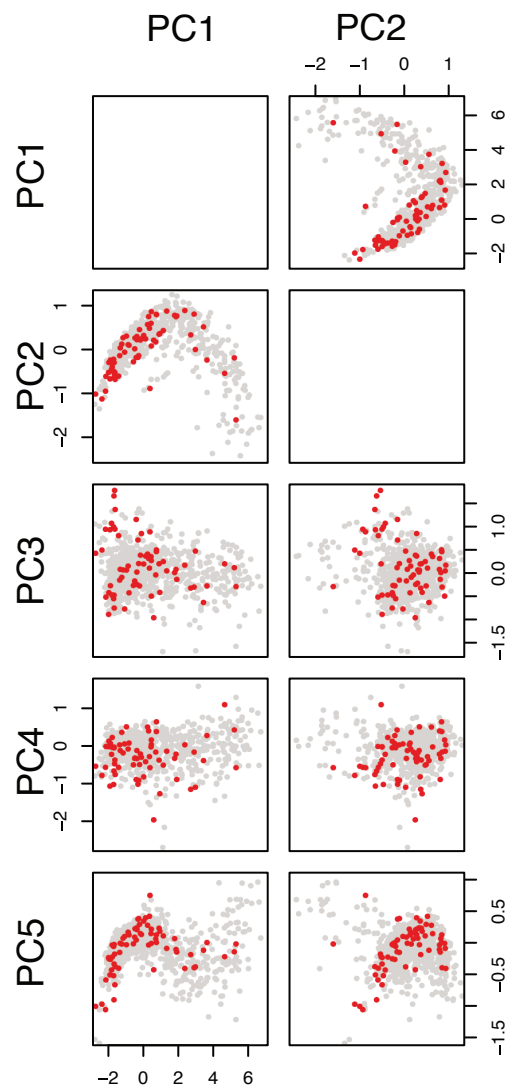

Figure 1 - figure supplement 2

Supplement: supp [file elife_poa_e05464_Figure_1_figure_supplement_2.pdf › elife_poa_e05464_Figure_1_figure_supplement_2.pdf]

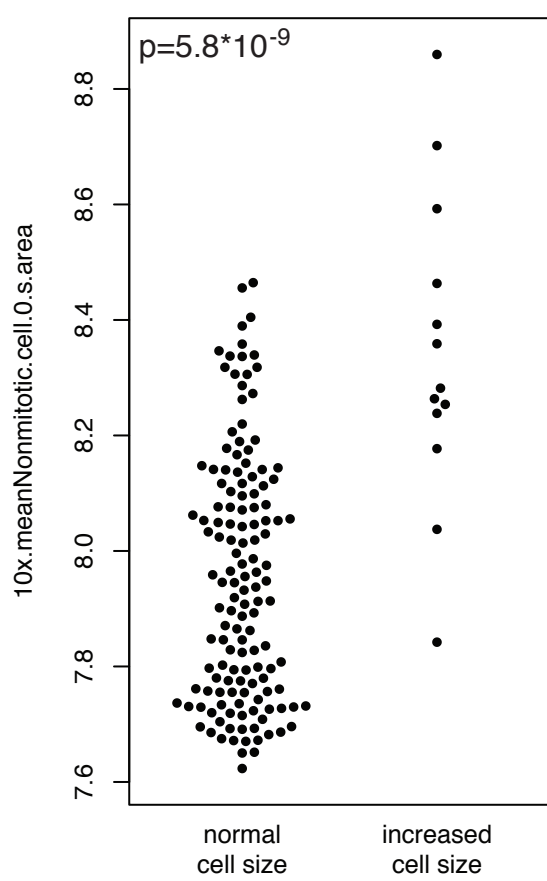

Rohn et al.

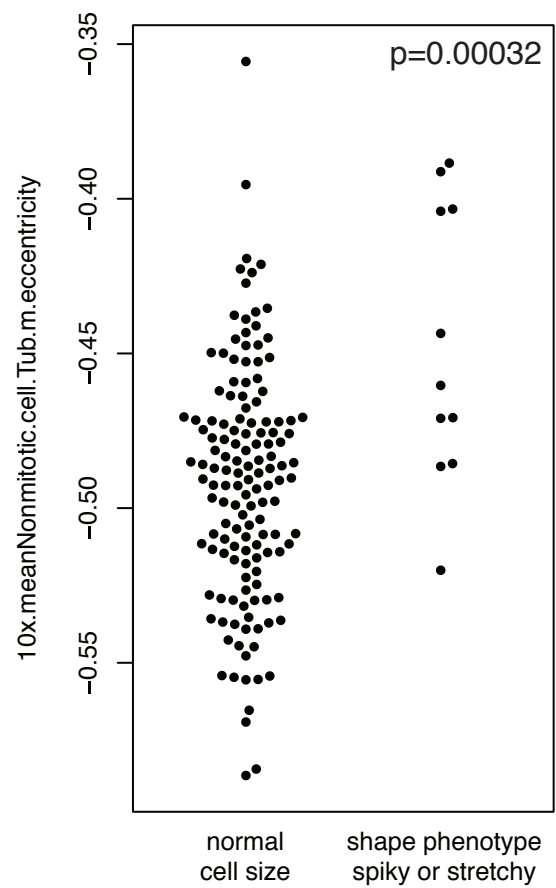

Rohn et al.

Figure 1 - figure supplement 3

Supplement: supp [file elife_poa_e05464_Figure_1_figure_supplement_3.pdf › elife_poa_e05464_Figure_1_figure_supplement_3.pdf]

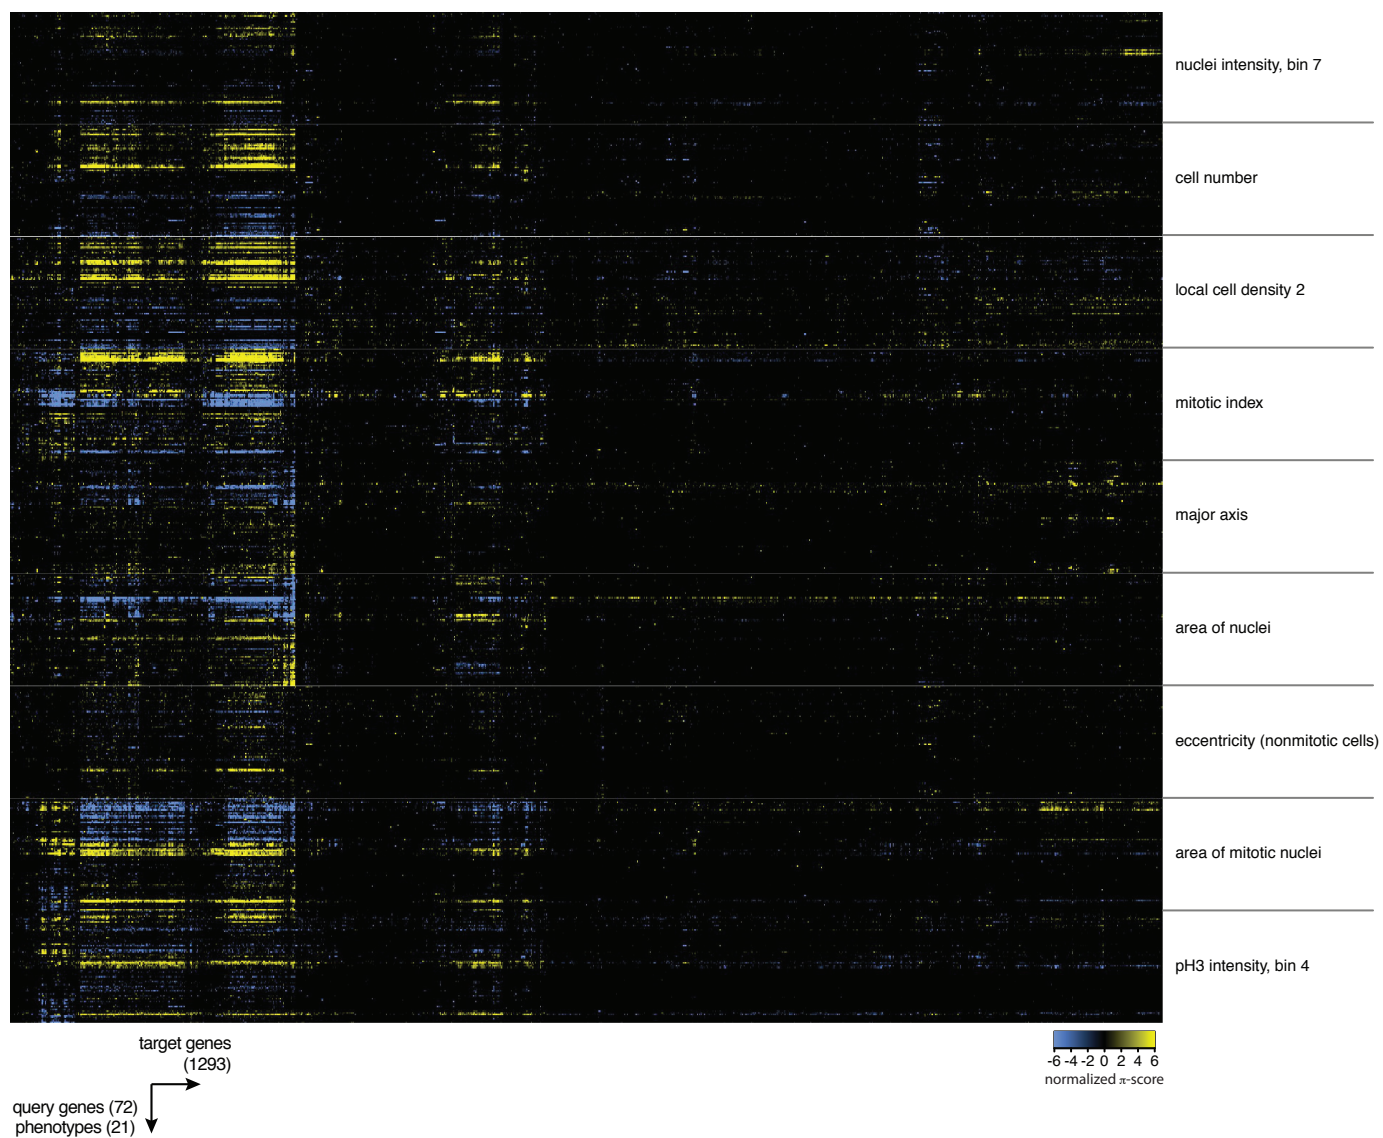

Figure 3 - figure supplement 1

Supplement: supp [file elife_poa_e05464_Figure_3_figure_supplement_1.pdf › elife_poa_e05464_Figure_3_figure_supplement_1.pdf]

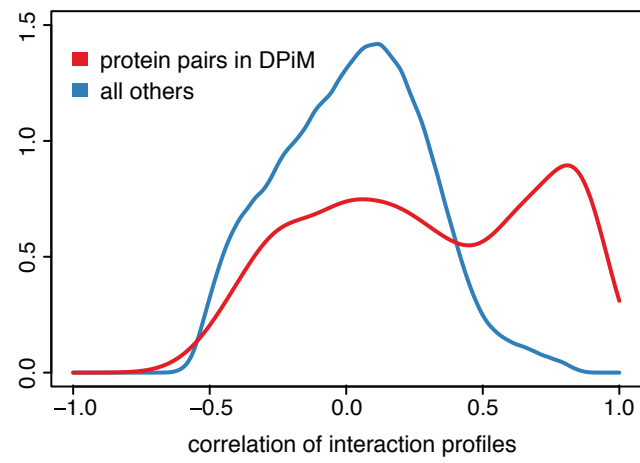

Figure 3 - figure supplement 2

Supplement: supp [file elife_poa_e05464_Figure_3_figure_supplement_2.pdf › elife_poa_e05464_Figure_3_figure_supplement_2.pdf]

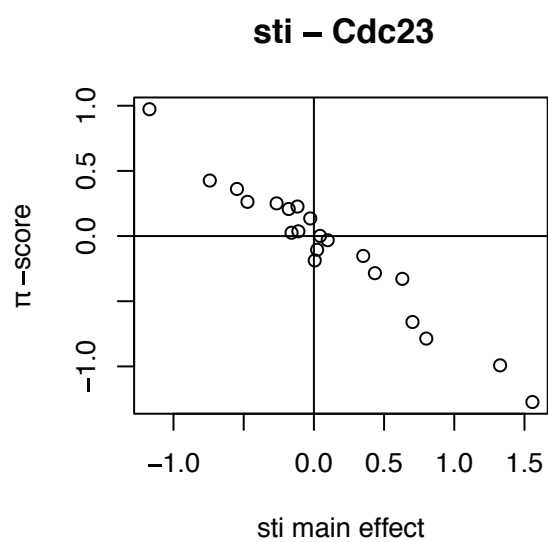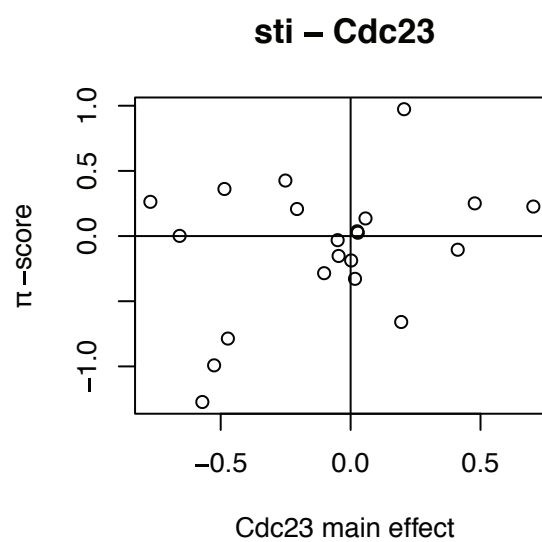

Figure 4 - figure supplement 2

Supplement: supp [file elife_poa_e05464_Figure_4_figure_supplement_2.pdf › elife_poa_e05464_Figure_4_figure_supplement_2.pdf]

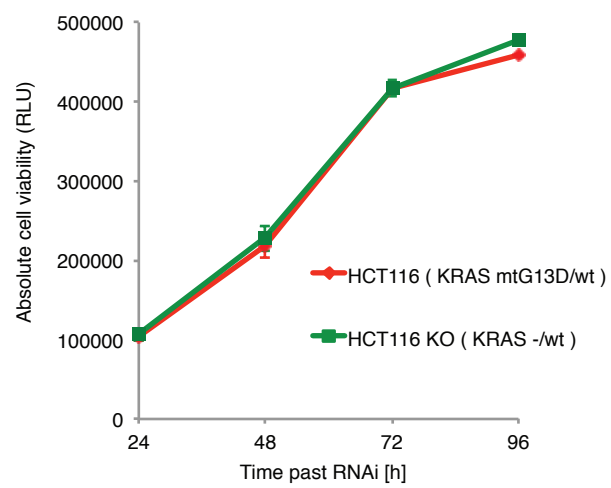

Figure 6 - figure supplement 1

Supplement: supp [file elife_poa_e05464_Figure_6_figure_supplement_1.pdf › elife_poa_e05464_Figure_6_figure_supplement_1.pdf]
